# Supplementary material
Source: PubMed Central journal article supplement (PMC3536153)
Supplement: IAI.01080-12_zii999099943so1.pdf [file IAI.01080-12_zii999099943so1.pdf]

## SUPPLEMENTAL DATA

### Genome expression analysis of non-proliferating intracellular *Salmonella* unravels an acid pH-dependent PhoP-PhoQ response essential for dormancy

Cristina Núñez-Hernández, Alberto Tierrez, Álvaro D. Ortega, M. Graciela Pucciarelli, Marta Godoy, Blanca Eisman, Josep Casadesús, and Francisco García-del Portillo

LPS SMA / 6 h p.i.

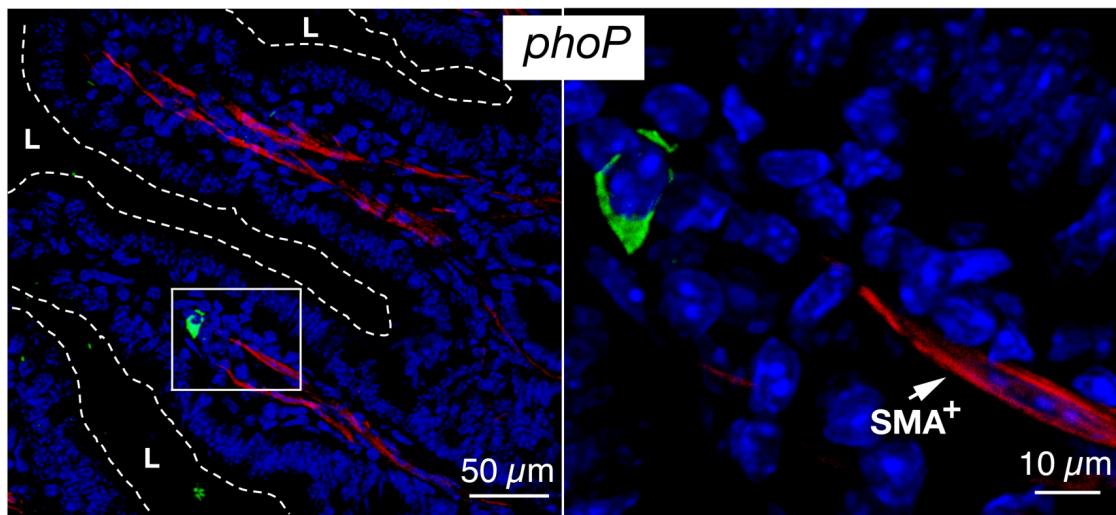

**Figure S1. *S. Typhimurium phoP* bacteria overgrow in stromal cells positioned in the lamina propria of mouse intestinal villi negative for the smooth-muscle actin (SMA) marker.** Samples were processed at 6 h after the oral administration of bacteria. SMA is shown in red and *S. Typhimurium* LPS in green. Nuclei were stained with To-Pro3. The image on the right is a higher magnification of the area outlined with a box in the left image. L: intestinal lumen.



**Table S1.** Gene expression comparison between *S. enterica* serovar Typhimurium wild-type strain SV5015 (SL1344, His<sup>+</sup>) and the isogenic mutant MD1120 (*phoP*::Tn10, His<sup>+</sup>) in active growth conditions (LB-exponential phase)

|                 |         |                                                         | <b>Extracellular<br/>phoP LB-exponential</b><br>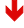<br><b>relative to extracellular<br/>WT, LB-exponential</b> |         |
|-----------------|---------|---------------------------------------------------------|------------------------------------------------------------------------------------------------------------------------------------------------------------------------------------------------|---------|
| Systematic name | Name    | Product                                                 | log2Ratio<br>(M)                                                                                                                                                                               | p value |
| STM0002         | thrA    | bifunctional aspartokinase I/homoserine dehydrogenase I | <b>0.19</b>                                                                                                                                                                                    | 0.76008 |
| STM0002         | thrA    | bifunctional aspartokinase I/homoserine dehydrogenase I | <b>-0.27</b>                                                                                                                                                                                   | 0.62199 |
| STM0003         | thrB    | homoserine kinase                                       | <b>-0.45</b>                                                                                                                                                                                   | 0.31280 |
| STM0003         | thrB    | homoserine kinase                                       | <b>-0.02</b>                                                                                                                                                                                   | 0.96687 |
| STM0004         | thrC    | threonine synthase                                      | <b>-0.35</b>                                                                                                                                                                                   | 0.38919 |
| STM0004         | thrC    | threonine synthase                                      | <b>-0.50</b>                                                                                                                                                                                   | 0.27312 |
| STM0005         | yaaA    | hypothetical protein STM0005                            | <b>-0.36</b>                                                                                                                                                                                   | 0.31280 |
| STM0005         | yaaA    | hypothetical protein STM0005                            | <b>0.21</b>                                                                                                                                                                                    | 0.55956 |
| STM0006         | yaaJ    | putative alanine/glycine transport protein              | <b>-0.22</b>                                                                                                                                                                                   | 0.56759 |
| STM0006         | yaaJ    | putative alanine/glycine transport protein              | <b>0.08</b>                                                                                                                                                                                    | 0.86296 |
| STM0007         | talB    | transaldolase                                           | <b>0.20</b>                                                                                                                                                                                    | 0.62980 |
| STM0007         | talB    | transaldolase                                           | <b>0.35</b>                                                                                                                                                                                    | 0.52101 |
| STM0008         | mogA    | molybdenum cofactor biosynthesis protein                | <b>-0.40</b>                                                                                                                                                                                   | 0.39186 |
| STM0008         | mogA    | molybdenum cofactor biosynthesis protein                | <b>-0.29</b>                                                                                                                                                                                   | 0.56569 |
| STM0009         | yaaH    | putative regulatory protein                             | <b>-0.76</b>                                                                                                                                                                                   | 0.30519 |
| STM0009         | yaaH    | putative regulatory protein                             | <b>-0.20</b>                                                                                                                                                                                   | 0.88198 |
| STM0010         | htgA    | positive regulator                                      | <b>-0.23</b>                                                                                                                                                                                   | 0.69828 |
| STM0010         | htgA    | positive regulator                                      | <b>-0.64</b>                                                                                                                                                                                   | 0.33452 |
| STM0011         | yaal    | putative periplasmic protein                            | <b>0.13</b>                                                                                                                                                                                    | 0.78844 |
| STM0011         | yaal    | putative periplasmic protein                            | <b>0.16</b>                                                                                                                                                                                    | 0.74436 |
| STM0012         | dnaK    | molecular chaperone DnaK                                | <b>-0.92</b>                                                                                                                                                                                   | 0.14154 |
| STM0012         | dnaK    | molecular chaperone DnaK                                | <b>-0.36</b>                                                                                                                                                                                   | 0.38320 |
| STM0013         | dnaJ    | heat shock protein                                      | <b>-0.77</b>                                                                                                                                                                                   | 0.14285 |
| STM0013         | dnaJ    | heat shock protein                                      | <b>-0.12</b>                                                                                                                                                                                   | 0.74361 |
| STM0014         | STM0014 | putative transcriptional regulator                      | <b>-0.32</b>                                                                                                                                                                                   | 0.45629 |
| STM0014         | STM0014 | putative transcriptional regulator                      | <b>-0.65</b>                                                                                                                                                                                   | 0.15799 |
| STM0015         | STM0015 | putative bacteriophage protein                          | <b>-0.09</b>                                                                                                                                                                                   | 0.83949 |
| STM0015         | STM0015 | putative bacteriophage protein                          | <b>-0.05</b>                                                                                                                                                                                   | 0.89675 |
| STM0016         | STM0016 | hypothetical protein STM0016                            | <b>0.36</b>                                                                                                                                                                                    | 0.56101 |
| STM0016         | STM0016 | hypothetical protein STM0016                            | <b>0.26</b>                                                                                                                                                                                    | 0.70137 |
| STM0017         | STM0017 | hypothetical protein STM0017                            | <b>0.57</b>                                                                                                                                                                                    | 0.38729 |
| STM0017         | STM0017 | hypothetical protein STM0017                            | <b>0.91</b>                                                                                                                                                                                    | 0.37342 |
| STM0018         | STM0018 | putative exochitinase                                   | <b>-0.38</b>                                                                                                                                                                                   | 0.59237 |
| STM0018         | STM0018 | putative exochitinase                                   | <b>0.11</b>                                                                                                                                                                                    | 0.86947 |
| STM0019         | STM0019 | putative hydroxymethyltransferase                       | <b>-0.03</b>                                                                                                                                                                                   | 0.96568 |
| STM0019         | STM0019 | putative hydroxymethyltransferase                       | <b>0.55</b>                                                                                                                                                                                    | 0.31139 |
| STM0020         | STM0020 | putative cytoplasmic protein                            | <b>0.15</b>                                                                                                                                                                                    | 0.80843 |
| STM0020         | STM0020 | putative cytoplasmic protein                            | <b>0.69</b>                                                                                                                                                                                    | 0.19927 |
| STM0021         | bcfA    | fimbrial subunit                                        | <b>-0.34</b>                                                                                                                                                                                   | 0.51487 |
| STM0021         | bcfA    | fimbrial subunit                                        | <b>-0.05</b>                                                                                                                                                                                   | 0.92884 |
| STM0022         | bcfB    | fimbrial chaperone                                      | <b>-0.45</b>                                                                                                                                                                                   | 0.35955 |
| STM0022         | bcfB    | fimbrial chaperone                                      | <b>0.23</b>                                                                                                                                                                                    | 0.64838 |
| STM0023         | bcfC    | fimbrial usher                                          | <b>-0.23</b>                                                                                                                                                                                   | 0.66177 |
| STM0023         | bcfC    | fimbrial usher                                          | <b>0.32</b>                                                                                                                                                                                    | 0.61833 |
| STM0024         | bcfD    | fimbrial subunit                                        | <b>-0.27</b>                                                                                                                                                                                   | 0.53840 |
| STM0024         | bcfD    | fimbrial subunit                                        | <b>0.90</b>                                                                                                                                                                                    | 0.29912 |
| STM0025         | bcfE    | fimbrial subunit                                        | <b>0.10</b>                                                                                                                                                                                    | 0.84244 |
| STM0025         | bcfE    | fimbrial subunit                                        | <b>0.48</b>                                                                                                                                                                                    | 0.30813 |
| STM0026         | bcfF    | fimbrial subunit                                        | <b>-0.05</b>                                                                                                                                                                                   | 0.92161 |
| STM0026         | bcfF    | fimbrial subunit                                        | <b>-0.10</b>                                                                                                                                                                                   | 0.87826 |
| STM0027         | bcfG    | fimbrial chaperone                                      | <b>-0.59</b>                                                                                                                                                                                   | 0.34449 |
| STM0027         | bcfG    | fimbrial chaperone                                      | <b>-0.28</b>                                                                                                                                                                                   | 0.51300 |
| STM0028         | bcfH    | putative thiol-disulfide isomerase                      | <b>0.15</b>                                                                                                                                                                                    | 0.77801 |
| STM0028         | bcfH    | putative thiol-disulfide isomerase                      | <b>0.44</b>                                                                                                                                                                                    | 0.45367 |

|            |            |                                                         |              |         |
|------------|------------|---------------------------------------------------------|--------------|---------|
| STM0028,1n | STM0028,1n | hypothetical protein STM0028,1n                         | <b>-0.50</b> | 0.19843 |
| STM0028,1n | STM0028,1n | hypothetical protein STM0028,1n                         | <b>-0.03</b> | 0.97415 |
| STM0029    | STM0029    | putative transcriptional regulator                      | <b>-0.48</b> | 0.41285 |
| STM0029    | STM0029    | putative transcriptional regulator                      | <b>0.59</b>  | 0.40227 |
| STM0030    | STM0030    | putative transcriptional regulator                      | <b>-0.12</b> | 0.81419 |
| STM0030    | STM0030    | putative transcriptional regulator                      | <b>0.25</b>  | 0.69398 |
| STM0031    | STM0031    | putative transcriptional regulator                      | <b>-0.22</b> | 0.70913 |
| STM0031    | STM0031    | putative transcriptional regulator                      | <b>0.62</b>  | 0.51486 |
| STM0032    | STM0032    | putative arylsulfatase                                  | <b>-0.63</b> | 0.20285 |
| STM0032    | STM0032    | putative arylsulfatase                                  | <b>-0.11</b> | 0.84486 |
| STM0033    | STM0033    | putative 5'-nucleotidase                                | <b>-0.33</b> | 0.65130 |
| STM0033    | STM0033    | putative 5'-nucleotidase                                | <b>-0.20</b> | 0.69882 |
| STM0034    | STM0034    | putative outer membrane/exported protein                | <b>0.30</b>  | 0.59096 |
| STM0034    | STM0034    | putative outer membrane/exported protein                | <b>1.09</b>  | 0.19994 |
| STM0035    | STM0035    | putative arylsulfatase                                  | <b>-0.65</b> | 0.26261 |
| STM0035    | STM0035    | putative arylsulfatase                                  | <b>0.44</b>  | 0.36017 |
| STM0036    | STM0036    | putative arylsulfatase regulator                        | <b>0.03</b>  | 0.95892 |
| STM0036    | STM0036    | putative arylsulfatase regulator                        | <b>-0.97</b> | 0.70229 |
| STM0037    | STM0037    | putative cytoplasmic protein                            | <b>0.00</b>  | 0.99452 |
| STM0037    | STM0037    | putative cytoplasmic protein                            | <b>0.42</b>  | 0.36636 |
| STM0038    | STM0038    | putative arylsulfatase                                  | <b>-0.08</b> | 0.88575 |
| STM0038    | STM0038    | putative arylsulfatase                                  | <b>0.09</b>  | 0.82839 |
| STM0039    | nhaA       | Na <sup>+</sup> /H antiporter                           | <b>-0.18</b> | 0.66443 |
| STM0039    | nhaA       | Na <sup>+</sup> /H antiporter                           | <b>0.04</b>  | 0.93582 |
| STM0040    | nhaR       | transcriptional activator                               | <b>-0.45</b> | 0.33531 |
| STM0040    | nhaR       | transcriptional activator                               | <b>0.33</b>  | 0.43219 |
| STM0041    | STM0041    | putative glycosyl hydrolase                             | <b>-0.36</b> | 0.50190 |
| STM0041    | STM0041    | putative glycosyl hydrolase                             | <b>0.07</b>  | 0.89542 |
| STM0042    | STM0042    | putative sodium galactoside symporter                   | <b>-0.23</b> | 0.76074 |
| STM0042    | STM0042    | putative sodium galactoside symporter                   | <b>0.60</b>  | 0.30481 |
| STM0043    | rpsT       | 30S ribosomal protein S20                               | <b>-0.64</b> | 0.38068 |
| STM0043    | rpsT       | 30S ribosomal protein S20                               | <b>-0.47</b> | 0.62054 |
| STM0044    | yaaY       | putative cytoplasmic protein                            | <b>-0.38</b> | 0.29726 |
| STM0044    | yaaY       | putative cytoplasmic protein                            | <b>-0.35</b> | 0.44020 |
| STM0045    | ribF       | hypothetical protein STM0045                            | <b>0.07</b>  | 0.86296 |
| STM0045    | ribF       | hypothetical protein STM0045                            | <b>0.18</b>  | 0.65130 |
| STM0046    | ileS       | isoleucyl-tRNA synthetase                               | <b>-0.14</b> | 0.70726 |
| STM0046    | ileS       | isoleucyl-tRNA synthetase                               | <b>0.11</b>  | 0.79185 |
| STM0047    | lspA       | signal peptidase II                                     | <b>-0.25</b> | 0.52101 |
| STM0047    | lspA       | signal peptidase II                                     | <b>-0.10</b> | 0.87154 |
| STM0048    | slpA       | FKBP-type peptidyl-prolyl cis-trans isomerase           | <b>-0.15</b> | 0.75544 |
| STM0048    | slpA       | FKBP-type peptidyl-prolyl cis-trans isomerase           | <b>0.38</b>  | 0.36092 |
| STM0049    | lytB       | 4-hydroxy-3-methylbut-2-enyl diphosphate reductase      | <b>-0.25</b> | 0.47159 |
| STM0049    | lytB       | 4-hydroxy-3-methylbut-2-enyl diphosphate reductase      | <b>-0.16</b> | 0.67919 |
| STM0050    | STM0050    | putative nitrite reductase                              | <b>-0.28</b> | 0.62174 |
| STM0050    | STM0050    | putative nitrite reductase                              | <b>0.13</b>  | 0.81667 |
| STM0051    | rihC       | putative purine nucleoside hydrolase                    | <b>-0.41</b> | 0.37241 |
| STM0051    | rihC       | putative purine nucleoside hydrolase                    | <b>0.01</b>  | 0.99268 |
| STM0052    | STM0052    | putative transcriptional regulator                      | <b>-0.38</b> | 0.34051 |
| STM0052    | STM0052    | putative transcriptional regulator                      | <b>0.22</b>  | 0.74243 |
| STM0053    | STM0053    | putative transcriptional regulator                      | <b>-0.14</b> | 0.75371 |
| STM0053    | STM0053    | putative transcriptional regulator                      | <b>-0.32</b> | 0.54735 |
| STM0054    | STM0054    | putative oxalacetate decarboxylase subunit beta         | <b>-0.38</b> | 0.55145 |
| STM0054    | STM0054    | putative oxalacetate decarboxylase subunit beta         | <b>0.02</b>  | 0.96595 |
| STM0054    | STM0054    | putative oxalacetate decarboxylase subunit beta         | <b>0.22</b>  | 0.67943 |
| STM0054    | STM0054    | putative oxalacetate decarboxylase subunit beta         | <b>0.40</b>  | 0.40121 |
| STM0056    | STM0056    | putative oxaloacetate decarboxylase subunit gamma       | <b>0.12</b>  | 0.80840 |
| STM0056    | STM0056    | putative oxaloacetate decarboxylase subunit gamma       | <b>1.05</b>  | 0.19946 |
| STM0057    | STM0057    | putative citrate-sodium symporter                       | <b>-0.02</b> | 0.98620 |
| STM0057    | STM0057    | putative citrate-sodium symporter                       | <b>0.71</b>  | 0.35824 |
| STM0058    | citC2      | putative citrate lyase synthetase                       | <b>-0.63</b> | 0.25759 |
| STM0058    | citC2      | putative citrate lyase synthetase                       | <b>-0.15</b> | 0.80976 |
| STM0059    | citD2      | putative citrate lyase acyl carrier protein gamma chain | <b>0.09</b>  | 0.94102 |

|         |         |                                                                 |              |         |
|---------|---------|-----------------------------------------------------------------|--------------|---------|
| STM0059 | citD2   | putative citrate lyase acyl carrier protein gamma chain         | <b>-0.04</b> | 0.97108 |
| STM0060 | citE2   | putative citrate lyase beta chain                               | <b>0.01</b>  | 0.98800 |
| STM0060 | citE2   | putative citrate lyase beta chain                               | <b>0.59</b>  | 0.46720 |
| STM0061 | citF2   | putative citrate lyase alpha chain/citrate-ACP transferase      | <b>0.23</b>  | 0.65795 |
| STM0061 | citF2   | putative citrate lyase alpha chain/citrate-ACP transferase      | <b>0.54</b>  | 0.56129 |
| STM0062 | citX2   | putative cytoplasmic protein                                    | <b>-0.57</b> | 0.18265 |
| STM0062 | citX2   | putative cytoplasmic protein                                    | <b>0.31</b>  | 0.38668 |
| STM0063 | citG2   | triphosphoribosyl-dephospho-CoA synthase                        | <b>-0.50</b> | 0.34070 |
| STM0063 | citG2   | triphosphoribosyl-dephospho-CoA synthase                        | <b>-0.16</b> | 0.68830 |
| STM0064 | dapB    | dihydrodipicolinate reductase                                   | <b>-0.03</b> | 0.95815 |
| STM0064 | dapB    | dihydrodipicolinate reductase                                   | <b>0.17</b>  | 0.73103 |
| STM0066 | carA    | carbamoyl-phosphate synthase small subunit                      | <b>-0.13</b> | 0.78755 |
| STM0066 | carA    | carbamoyl-phosphate synthase small subunit                      | <b>0.24</b>  | 0.62216 |
| STM0067 | carB    | carbamoyl-phosphate synthase large subunit                      | <b>-0.15</b> | 0.79893 |
| STM0067 | carB    | carbamoyl-phosphate synthase large subunit                      | <b>0.05</b>  | 0.93419 |
| STM0068 | caiF    | of cai/fix operon transcriptional regulator                     | <b>0.12</b>  | 0.92074 |
| STM0068 | caiF    | of cai/fix operon transcriptional regulator                     | <b>-0.73</b> | 0.37466 |
| STM0069 | caiE    | carnitine racemase stimulation factor                           | <b>-1.44</b> | 0.04499 |
| STM0069 | caiE    | carnitine racemase stimulation factor                           | <b>0.24</b>  | 0.62617 |
| STM0070 | caiD    | carnitiny-CoA dehydratase                                       | <b>-0.73</b> | 0.25357 |
| STM0070 | caiD    | carnitiny-CoA dehydratase                                       | <b>-0.17</b> | 0.78990 |
| STM0071 | caiC    | crotonobetaine/carnitine-CoA ligase                             | <b>-0.23</b> | 0.65181 |
| STM0071 | caiC    | crotonobetaine/carnitine-CoA ligase                             | <b>0.67</b>  | 0.16696 |
| STM0072 | caiB    | crotonobetainyl-CoA:carnitineCoA-transferase                    | <b>-0.60</b> | 0.19398 |
| STM0072 | caiB    | crotonobetainyl-CoA:carnitineCoA-transferase                    | <b>-0.10</b> | 0.89487 |
| STM0073 | caiA    | crotonobetainyl-CoA dehydrogenase                               | <b>-0.26</b> | 0.66893 |
| STM0073 | caiA    | crotonobetainyl-CoA dehydrogenase                               | <b>0.03</b>  | 0.95703 |
| STM0074 | caiT    | L-carnitine/gamma-butyrobetaine antiporter                      | <b>-0.46</b> | 0.45852 |
| STM0074 | caiT    | L-carnitine/gamma-butyrobetaine antiporter                      | <b>-0.04</b> | 0.94573 |
| STM0075 | fixA    | putative electron transfer flavoprotein subunit beta            | <b>-0.74</b> | 0.24907 |
| STM0075 | fixA    | putative electron transfer flavoprotein subunit beta            | <b>0.92</b>  | 0.28406 |
| STM0076 | fixB    | putative electron transfer flavoprotein subunit alpha           | <b>-0.32</b> | 0.65724 |
| STM0076 | fixB    | putative electron transfer flavoprotein subunit alpha           | <b>0.02</b>  | 0.96687 |
| STM0077 | fixC    | flavoprotein                                                    | <b>0.06</b>  | 0.94765 |
| STM0077 | fixC    | flavoprotein                                                    | <b>0.53</b>  | 0.31458 |
| STM0078 | fixX    | putative ferredoxin                                             | <b>-0.15</b> | 0.85270 |
| STM0078 | fixX    | putative ferredoxin                                             | <b>1.03</b>  | 0.16658 |
| STM0079 | yaaU    | putative transport protein                                      | <b>0.01</b>  | 0.98332 |
| STM0079 | yaaU    | putative transport protein                                      | <b>1.18</b>  | 0.11416 |
| STM0080 | STM0080 | putative outer membrane lipoprotein                             | <b>-0.17</b> | 0.71298 |
| STM0080 | STM0080 | putative outer membrane lipoprotein                             | <b>0.86</b>  | 0.13112 |
| STM0081 | STM0081 | putative secreted protein                                       | <b>-0.96</b> | 0.12727 |
| STM0081 | STM0081 | putative secreted protein                                       | <b>-0.02</b> | 0.97050 |
| STM0082 | STM0082 | putative secreted protein                                       | <b>0.12</b>  | 0.77474 |
| STM0082 | STM0082 | putative secreted protein                                       | <b>0.87</b>  | 0.17276 |
| STM0084 | STM0084 | putative sulfatase                                              | <b>-0.73</b> | 0.19843 |
| STM0084 | STM0084 | putative sulfatase                                              | <b>-0.14</b> | 0.80103 |
| STM0085 | yabF    | glutathione-regulated potassium-efflux system ancillary protein | <b>-0.03</b> | 0.96165 |
| STM0085 | yabF    | glutathione-regulated potassium-efflux system ancillary protein | <b>0.31</b>  | 0.59497 |
| STM0086 | kefC    | glutathione-regulated potassium-efflux system protein           | <b>0.09</b>  | 0.89580 |
| STM0086 | kefC    | glutathione-regulated potassium-efflux system protein           | <b>0.41</b>  | 0.57686 |
| STM0087 | folA    | dihydrofolate reductase type I                                  | <b>-0.01</b> | 0.98555 |
| STM0087 | folA    | dihydrofolate reductase type I                                  | <b>0.21</b>  | 0.62757 |
| STM0088 | apaH    | diadenosinetetraphosphatase                                     | <b>-0.11</b> | 0.84910 |
| STM0088 | apaH    | diadenosinetetraphosphatase                                     | <b>0.23</b>  | 0.64525 |
| STM0089 | apaG    | hypothetical protein STM0089                                    | <b>-0.25</b> | 0.53453 |
| STM0089 | apaG    | hypothetical protein STM0089                                    | <b>-0.08</b> | 0.87740 |
| STM0090 | ksgA    | dimethyladenosine transferase                                   | <b>0.03</b>  | 0.95380 |
| STM0090 | ksgA    | dimethyladenosine transferase                                   | <b>-0.04</b> | 0.92637 |

|         |         |                                                                    |              |         |
|---------|---------|--------------------------------------------------------------------|--------------|---------|
| STM0091 | pdxA    | 4-hydroxythreonine-4-phosphate dehydrogenase                       | <b>-0.16</b> | 0.68240 |
| STM0091 | pdxA    | 4-hydroxythreonine-4-phosphate dehydrogenase                       | <b>-0.39</b> | 0.29044 |
| STM0092 | surA    | peptidyl-prolyl cis-trans isomerase                                | <b>-0.45</b> | 0.26869 |
| STM0092 | surA    | peptidyl-prolyl cis-trans isomerase                                | <b>0.26</b>  | 0.52101 |
| STM0093 | imp     | organic solvent tolerance protein precursor                        | <b>0.04</b>  | 0.93039 |
| STM0093 | imp     | organic solvent tolerance protein precursor                        | <b>0.01</b>  | 0.97994 |
| STM0094 | djlA    | Dna-J like membrane chaperone protein                              | <b>-0.32</b> | 0.62216 |
| STM0094 | djlA    | Dna-J like membrane chaperone protein                              | <b>0.25</b>  | 0.69882 |
| STM0095 | rluA    | 23S rRNA pseudouridylate 746 synthase                              | <b>-0.44</b> | 0.29912 |
| STM0095 | rluA    | 23S rRNA pseudouridylate 746 synthase                              | <b>-0.03</b> | 0.95563 |
| STM0096 | hepA    | ATP-dependent helicase HepA                                        | <b>-0.13</b> | 0.76622 |
| STM0096 | hepA    | ATP-dependent helicase HepA                                        | <b>0.32</b>  | 0.49035 |
| STM0097 | polB    | DNA polymerase II                                                  | <b>-0.01</b> | 0.98581 |
| STM0097 | polB    | DNA polymerase II                                                  | <b>0.29</b>  | 0.47610 |
| STM0098 | STM0098 | putative secreted protein                                          | <b>-0.24</b> | 0.70144 |
| STM0098 | STM0098 | putative secreted protein                                          | <b>-0.03</b> | 0.97050 |
| STM0100 | STM0100 | putative cytoplasmic protein                                       | <b>-0.46</b> | 0.38277 |
| STM0100 | STM0100 | putative cytoplasmic protein                                       | <b>-0.08</b> | 0.89105 |
| STM0101 | araD    | L-ribulose-5-phosphate 4-epimerase                                 | <b>-0.67</b> | 0.31989 |
| STM0101 | araD    | L-ribulose-5-phosphate 4-epimerase                                 | <b>0.18</b>  | 0.81960 |
| STM0102 | araA    | L-arabinose isomerase                                              | <b>-0.76</b> | 0.20285 |
| STM0102 | araA    | L-arabinose isomerase                                              | <b>0.16</b>  | 0.73473 |
| STM0103 | araB    | ribulokinase                                                       | <b>-0.38</b> | 0.62216 |
| STM0103 | araB    | ribulokinase                                                       | <b>-0.57</b> | 0.46088 |
| STM0104 | araC    | arabinose operon transcriptional regulator                         | <b>-0.49</b> | 0.27591 |
| STM0104 | araC    | arabinose operon transcriptional regulator                         | <b>0.82</b>  | 0.34148 |
| STM0105 | yabI    | hypothetical protein STM0105                                       | <b>-0.36</b> | 0.50375 |
| STM0105 | yabI    | hypothetical protein STM0105                                       | <b>-0.22</b> | 0.65974 |
| STM0106 | yabJ    | putative ABC transporter protein                                   | <b>-0.49</b> | 0.46539 |
| STM0106 | yabJ    | putative ABC transporter protein                                   | <b>-0.30</b> | 0.43439 |
| STM0107 | thiP    | thiamin ABC transporter membrane component                         | <b>-0.18</b> | 0.72213 |
| STM0107 | thiP    | thiamin ABC transporter membrane component                         | <b>-0.04</b> | 0.95608 |
| STM0108 | tbpA    | thiamine-binding periplasmic protein                               | <b>-1.05</b> | 0.11849 |
| STM0108 | tbpA    | thiamine-binding periplasmic protein                               | <b>-0.24</b> | 0.61597 |
| STM0109 | yabN    | putative periplasmic binding protein                               | <b>-0.01</b> | 0.99505 |
| STM0109 | yabN    | putative periplasmic binding protein                               | <b>0.09</b>  | 0.83240 |
| STM0110 | leuD    | isopropylmalate isomerase small subunit                            | <b>-0.11</b> | 0.89039 |
| STM0110 | leuD    | isopropylmalate isomerase small subunit                            | <b>0.29</b>  | 0.54510 |
| STM0111 | leuC    | isopropylmalate isomerase large subunit                            | <b>-0.37</b> | 0.55598 |
| STM0111 | leuC    | isopropylmalate isomerase large subunit                            | <b>0.40</b>  | 0.47107 |
| STM0112 | leuB    | 3-isopropylmalate dehydrogenase                                    | <b>-0.06</b> | 0.93586 |
| STM0112 | leuB    | 3-isopropylmalate dehydrogenase                                    | <b>0.12</b>  | 0.79285 |
| STM0113 | leuA    | 2-isopropylmalate synthase                                         | <b>-0.79</b> | 0.18265 |
| STM0113 | leuA    | 2-isopropylmalate synthase                                         | <b>-0.13</b> | 0.79662 |
| STM0115 | leuO    | leucine transcriptional activator                                  | <b>0.40</b>  | 0.48808 |
| STM0115 | leuO    | leucine transcriptional activator                                  | <b>0.91</b>  | 0.18634 |
| STM0116 | ilvI    | acetolactate synthase III large subunit                            | <b>-0.07</b> | 0.90671 |
| STM0116 | ilvI    | acetolactate synthase III large subunit                            | <b>0.80</b>  | 0.24907 |
| STM0117 | ilvH    | acetolactate synthase small subunit                                | <b>-0.16</b> | 0.68032 |
| STM0117 | ilvH    | acetolactate synthase small subunit                                | <b>0.15</b>  | 0.72476 |
| STM0118 | fruR    | fru operon transcriptional repressor                               | <b>-0.22</b> | 0.62477 |
| STM0118 | fruR    | fru operon transcriptional repressor                               | <b>0.12</b>  | 0.81533 |
| STM0119 | yabB    | hypothetical protein STM0119                                       | <b>-0.24</b> | 0.54162 |
| STM0119 | yabB    | hypothetical protein STM0119                                       | <b>-0.02</b> | 0.98132 |
| STM0120 | mraW    | S-adenosyl-methyltransferase                                       | <b>0.10</b>  | 0.83109 |
| STM0120 | mraW    | S-adenosyl-methyltransferase                                       | <b>0.32</b>  | 0.41024 |
| STM0121 | ftsL    | cell division protein                                              | <b>-0.17</b> | 0.71931 |
| STM0121 | ftsL    | cell division protein                                              | <b>0.77</b>  | 0.11671 |
| STM0122 | ftsI    | division specific transpeptidase                                   | <b>-0.69</b> | 0.22087 |
| STM0122 | ftsI    | division specific transpeptidase                                   | <b>-0.16</b> | 0.74231 |
| STM0123 | murE    | UDP-N-acetylmuramoylalanyl-D-glutamate--2,6-diaminopimelate ligase | <b>-0.19</b> | 0.65502 |

|         |         |                                                                    |              |         |
|---------|---------|--------------------------------------------------------------------|--------------|---------|
| STM0123 | murE    | UDP-N-acetylmuramoylalanyl-D-glutamate--2,6-diaminopimelate ligase | <b>0.08</b>  | 0.88045 |
| STM0124 | murF    | D-alanine-D-alanine ligase                                         | <b>-0.13</b> | 0.75721 |
| STM0124 | murF    | D-alanine-D-alanine ligase                                         | <b>0.01</b>  | 0.98140 |
| STM0125 | mraY    | phospho-N-acetylmuramoyl-pentapeptide-transferase                  | <b>-0.31</b> | 0.48062 |
| STM0125 | mraY    | phospho-N-acetylmuramoyl-pentapeptide-transferase                  | <b>0.07</b>  | 0.88156 |
| STM0126 | murD    | UDP-N-acetylmuramoyl-L-alanyl-D-glutamate synthetase               | <b>-0.41</b> | 0.36311 |
| STM0126 | murD    | UDP-N-acetylmuramoyl-L-alanyl-D-glutamate synthetase               | <b>-0.11</b> | 0.81027 |
| STM0127 | ftsW    | essential cell division gene                                       | <b>0.09</b>  | 0.83100 |
| STM0127 | ftsW    | essential cell division gene                                       | <b>-0.02</b> | 0.96027 |
| STM0128 | murG    | N-acetylglucosaminyl transferase                                   | <b>0.00</b>  | 0.99512 |
| STM0128 | murG    | N-acetylglucosaminyl transferase                                   | <b>-0.01</b> | 0.98193 |
| STM0129 | murC    | UDP-N-acetylmuramate--L-alanine ligase                             | <b>-0.10</b> | 0.83443 |
| STM0129 | murC    | UDP-N-acetylmuramate--L-alanine ligase                             | <b>0.08</b>  | 0.86895 |
| STM0130 | ddl     | D-alanylalanine synthetase                                         | <b>-0.02</b> | 0.96785 |
| STM0130 | ddl     | D-alanylalanine synthetase                                         | <b>-0.19</b> | 0.69398 |
| STM0131 | ftsQ    | cell division protein                                              | <b>-0.38</b> | 0.56162 |
| STM0131 | ftsQ    | cell division protein                                              | <b>-0.11</b> | 0.82585 |
| STM0132 | ftsA    | cell division protein                                              | <b>-0.05</b> | 0.91144 |
| STM0132 | ftsA    | cell division protein                                              | <b>0.55</b>  | 0.18706 |
| STM0133 | ftsZ    | cell division protein FtsZ                                         | <b>-0.13</b> | 0.74995 |
| STM0133 | ftsZ    | cell division protein FtsZ                                         | <b>0.15</b>  | 0.69398 |
| STM0134 | lpxC    | UDP-3-O-[3-hydroxymyristoyl] N-acetylglucosamine deacetylase       | <b>-0.09</b> | 0.82656 |
| STM0134 | lpxC    | UDP-3-O-[3-hydroxymyristoyl] N-acetylglucosamine deacetylase       | <b>0.10</b>  | 0.77677 |
| STM0135 | yacA    | SecA regulator SecM                                                | <b>-0.07</b> | 0.87368 |
| STM0135 | yacA    | SecA regulator SecM                                                | <b>0.20</b>  | 0.60936 |
| STM0136 | secA    | translocase                                                        | <b>-0.52</b> | 0.28030 |
| STM0136 | secA    | translocase                                                        | <b>-0.30</b> | 0.44020 |
| STM0137 | mutT    | 7,8-dihydro-8-oxoguanine-triphosphatase                            | <b>-0.16</b> | 0.72247 |
| STM0137 | mutT    | 7,8-dihydro-8-oxoguanine-triphosphatase                            | <b>-0.01</b> | 0.98640 |
| STM0138 | yacG    | zinc-binding protein                                               | <b>-0.40</b> | 0.31989 |
| STM0138 | yacG    | zinc-binding protein                                               | <b>0.38</b>  | 0.43417 |
| STM0139 | yacF    | hypothetical protein STM0139                                       | <b>-0.20</b> | 0.64595 |
| STM0139 | yacF    | hypothetical protein STM0139                                       | <b>-0.03</b> | 0.95855 |
| STM0140 | coaE    | dephospho-CoA kinase                                               | <b>-0.20</b> | 0.71973 |
| STM0140 | coaE    | dephospho-CoA kinase                                               | <b>0.15</b>  | 0.73106 |
| STM0141 | guaC    | guanosine 5'-monophosphate oxidoreductase                          | <b>-0.24</b> | 0.55008 |
| STM0141 | guaC    | guanosine 5'-monophosphate oxidoreductase                          | <b>0.34</b>  | 0.38875 |
| STM0142 | hofC    | putative type IV pilin assembly protein                            | <b>-0.04</b> | 0.94223 |
| STM0142 | hofC    | putative type IV pilin assembly protein                            | <b>-0.39</b> | 0.34148 |
| STM0143 | hofB    | putative type IV fimbrial biosynthetic protein                     | <b>-0.55</b> | 0.20483 |
| STM0143 | hofB    | putative type IV fimbrial biosynthetic protein                     | <b>0.00</b>  | 0.99733 |
| STM0144 | ppdD    | putative type IV pilin major component                             | <b>-0.21</b> | 0.72518 |
| STM0144 | ppdD    | putative type IV pilin major component                             | <b>0.11</b>  | 0.83476 |
| STM0145 | nadC    | nicotinate-nucleotide pyrophosphorylase                            | <b>-0.13</b> | 0.83657 |
| STM0145 | nadC    | nicotinate-nucleotide pyrophosphorylase                            | <b>0.10</b>  | 0.84930 |
| STM0146 | ampD    | N-acetyl-anhydromuramyl-L-alanine amidase                          | <b>0.05</b>  | 0.91783 |
| STM0146 | ampD    | N-acetyl-anhydromuramyl-L-alanine amidase                          | <b>0.31</b>  | 0.52897 |
| STM0147 | ampE    | putative beta lactamase regulator                                  | <b>-0.16</b> | 0.86370 |
| STM0147 | ampE    | putative beta lactamase regulator                                  | <b>-0.34</b> | 0.38389 |
| STM0148 | STM0148 | putative cytoplasmic protein                                       | <b>-0.08</b> | 0.85893 |
| STM0148 | STM0148 | putative cytoplasmic protein                                       | <b>1.08</b>  | 0.15736 |
| STM0149 | STM0149 | Na+/galactoside symporter                                          | <b>-1.12</b> | 0.06780 |
| STM0149 | STM0149 | Na+/galactoside symporter                                          | <b>0.11</b>  | 0.84687 |
| STM0150 | aroP    | aromatic amino acid transporter                                    | <b>-0.39</b> | 0.37657 |
| STM0150 | aroP    | aromatic amino acid transporter                                    | <b>0.44</b>  | 0.42277 |
| STM0151 | pdhR    | transcriptional regulator of pyruvate dehydrogenase complex        | <b>-0.32</b> | 0.40500 |

|         |         |                                                     |              |         |
|---------|---------|-----------------------------------------------------|--------------|---------|
|         |         | transcriptional regulator of pyruvate dehydrogenase |              |         |
| STM0151 | pdhR    | complex                                             | <b>0.11</b>  | 0.84456 |
| STM0152 | aceE    | pyruvate dehydrogenase E1 component                 | <b>-0.12</b> | 0.84187 |
| STM0152 | aceE    | pyruvate dehydrogenase E1 component                 | <b>0.03</b>  | 0.97474 |
| STM0153 | aceF    | dihydrolipoamide acetyltransferase                  | <b>-0.08</b> | 0.85988 |
| STM0153 | aceF    | dihydrolipoamide acetyltransferase                  | <b>-0.52</b> | 0.24571 |
| STM0154 | lpdA    | dihydrolipoamide dehydrogenase                      | <b>-0.39</b> | 0.34070 |
| STM0154 | lpdA    | dihydrolipoamide dehydrogenase                      | <b>0.05</b>  | 0.92183 |
| STM0155 | STM0155 | putative outer membrane protein                     | <b>0.15</b>  | 0.77683 |
| STM0155 | STM0155 | putative outer membrane protein                     | <b>0.71</b>  | 0.27269 |
| STM0156 | STM0156 | putative periplasmic protein                        | <b>-0.25</b> | 0.56095 |
| STM0156 | STM0156 | putative periplasmic protein                        | <b>0.46</b>  | 0.30605 |
| STM0157 | yacH    | putative outer membrane protein                     | <b>0.22</b>  | 0.74807 |
| STM0157 | yacH    | putative outer membrane protein                     | <b>0.77</b>  | 0.13813 |
| STM0158 | acnB    | aconitate hydratase                                 | <b>-0.24</b> | 0.55338 |
| STM0158 | acnB    | aconitate hydratase                                 | <b>-0.24</b> | 0.55956 |
| STM0159 | STM0159 | putative restriction endonuclease                   | <b>-0.19</b> | 0.70458 |
| STM0159 | STM0159 | putative restriction endonuclease                   | <b>0.26</b>  | 0.65413 |
| STM0160 | yacL    | hypothetical protein STM0160                        | <b>0.01</b>  | 0.98032 |
| STM0160 | yacL    | hypothetical protein STM0160                        | <b>0.31</b>  | 0.49336 |
| STM0161 | kdgT    | 2-keto-3-deoxygluconate permease                    | <b>0.09</b>  | 0.91428 |
| STM0161 | kdgT    | 2-keto-3-deoxygluconate permease                    | <b>0.38</b>  | 0.36243 |
| STM0162 | STM0162 | putative inner membrane protein                     | <b>-0.15</b> | 0.78973 |
| STM0162 | STM0162 | putative inner membrane protein                     | <b>0.35</b>  | 0.57019 |
| STM0163 | STM0163 | 4-hydroxythreonine-4-phosphate dehydrogenase        | <b>-0.55</b> | 0.21979 |
| STM0163 | STM0163 | 4-hydroxythreonine-4-phosphate dehydrogenase        | <b>0.38</b>  | 0.36311 |
| STM0164 | STM0164 | putative transcriptional regulator                  | <b>-0.06</b> | 0.87707 |
| STM0164 | STM0164 | putative transcriptional regulator                  | <b>0.29</b>  | 0.40930 |
| STM0165 | speD    | S-adenosylmethionine decarboxylase proenzyme        | <b>-0.13</b> | 0.82521 |
| STM0165 | speD    | S-adenosylmethionine decarboxylase proenzyme        | <b>0.17</b>  | 0.64180 |
| STM0166 | speE    | spermidine synthase                                 | <b>-0.04</b> | 0.93023 |
| STM0166 | speE    | spermidine synthase                                 | <b>0.07</b>  | 0.86385 |
| STM0167 | yacC    | putative periplasmic protein                        | <b>-0.04</b> | 0.93385 |
| STM0167 | yacC    | putative periplasmic protein                        | <b>0.08</b>  | 0.86190 |
| STM0168 | cueO    | putative multicopper oxidase                        | <b>-0.50</b> | 0.28240 |
| STM0168 | cueO    | putative multicopper oxidase                        | <b>0.30</b>  | 0.43550 |
| STM0169 | gcd     | glucose dehydrogenase                               | <b>-0.40</b> | 0.39721 |
| STM0169 | gcd     | glucose dehydrogenase                               | <b>0.40</b>  | 0.43577 |
| STM0170 | hpt     | hypoxanthine-guanine phosphoribosyltransferase      | <b>-0.17</b> | 0.65795 |
| STM0170 | hpt     | hypoxanthine-guanine phosphoribosyltransferase      | <b>-0.04</b> | 0.94087 |
| STM0171 | yadF    | putative carbonic anhydrase                         | <b>0.05</b>  | 0.94990 |
| STM0171 | yadF    | putative carbonic anhydrase                         | <b>0.04</b>  | 0.94050 |
|         |         | putative ABC-type multidrug transport system ATPase |              |         |
| STM0172 | yadG    | component                                           | <b>-0.36</b> | 0.37241 |
|         |         | putative ABC-type multidrug transport system ATPase |              |         |
| STM0172 | yadG    | component                                           | <b>0.26</b>  | 0.63223 |
| STM0173 | yadH    | putative transport protein                          | <b>0.04</b>  | 0.93949 |
| STM0173 | yadH    | putative transport protein                          | <b>0.27</b>  | 0.64174 |
| STM0174 | stiH    | putative fimbrial protein precursors                | <b>-0.88</b> | 0.08679 |
| STM0174 | stiH    | putative fimbrial protein precursors                | <b>0.14</b>  | 0.79936 |
| STM0175 | stiC    | putative fimbrial usher                             | <b>0.02</b>  | 0.97092 |
| STM0175 | stiC    | putative fimbrial usher                             | <b>0.75</b>  | 0.17754 |
| STM0176 | stiB    | putative fimbrial chaperone                         | <b>-0.18</b> | 0.89058 |
| STM0176 | stiB    | putative fimbrial chaperone                         | <b>0.13</b>  | 0.87298 |
| STM0177 | stiA    | putative fimbrial subunit                           | <b>0.20</b>  | 0.72143 |
| STM0177 | stiA    | putative fimbrial subunit                           | <b>-0.12</b> | 0.79213 |
| STM0178 | yadI    | putative PTS enzyme                                 | <b>-0.12</b> | 0.76970 |
| STM0178 | yadI    | putative PTS enzyme                                 | <b>-0.13</b> | 0.82521 |
| STM0179 | yadE    | putative xylanase/chitin deacetylase                | <b>-0.16</b> | 0.70472 |
| STM0179 | yadE    | putative xylanase/chitin deacetylase                | <b>-0.36</b> | 0.52861 |
| STM0180 | panD    | aspartate 1-decarboxylase precursor                 | <b>-0.29</b> | 0.51988 |
| STM0180 | panD    | aspartate 1-decarboxylase precursor                 | <b>0.25</b>  | 0.73473 |
| STM0181 | panC    | pantoate--beta-alanine ligase                       | <b>-0.02</b> | 0.96568 |

|           |         |                                                            |              |         |
|-----------|---------|------------------------------------------------------------|--------------|---------|
| STM0181   | panC    | pantoate--beta-alanine ligase                              | <b>0.38</b>  | 0.40905 |
| STM0182   | panB    | 3-methyl-2-oxobutanoate hydroxymethyltransferase           | <b>0.09</b>  | 0.84503 |
| STM0182   | panB    | 3-methyl-2-oxobutanoate hydroxymethyltransferase           | <b>0.13</b>  | 0.82814 |
| STM0183   | folK    | 7,8-dihydro-6-hydroxymethylpterin-pyrophosphokinase        | <b>-0.22</b> | 0.59675 |
| STM0183   | folK    | 7,8-dihydro-6-hydroxymethylpterin-pyrophosphokinase        | <b>0.01</b>  | 0.97849 |
| STM0184   | pcnB    | polyA polymerase I                                         | <b>-0.10</b> | 0.83610 |
| STM0184   | pcnB    | polyA polymerase I                                         | <b>0.05</b>  | 0.92262 |
| STM0185   | yadB    | glutamyl-tRNA synthetase                                   | <b>0.15</b>  | 0.72146 |
| STM0185   | yadB    | glutamyl-tRNA synthetase                                   | <b>0.21</b>  | 0.66489 |
| STM0186   | dksA    | dnaK suppressor protein                                    | <b>0.00</b>  | 0.99512 |
| STM0186   | dksA    | dnaK suppressor protein                                    | <b>0.06</b>  | 0.91359 |
| STM0187   | sfsA    | sugar fermentation stimulation protein                     | <b>0.01</b>  | 0.98398 |
| STM0187   | sfsA    | sugar fermentation stimulation protein                     | <b>0.17</b>  | 0.65730 |
| STM0188   | ligT    | 2'-5' RNA ligase                                           | <b>0.05</b>  | 0.92403 |
| STM0188   | ligT    | 2'-5' RNA ligase                                           | <b>0.09</b>  | 0.83982 |
| STM0189   | hrpB    | ATP-dependent helicase                                     | <b>-0.49</b> | 0.39428 |
| STM0189   | hrpB    | ATP-dependent helicase                                     | <b>0.24</b>  | 0.55978 |
| STM0190   | mrcB    | penicillin-binding protein 1b                              | <b>-0.27</b> | 0.53206 |
| STM0190   | mrcB    | penicillin-binding protein 1b                              | <b>-0.04</b> | 0.93280 |
| STM0191   | fhuA    | outer membrane ferrichrome receptor protein precursor      | <b>0.10</b>  | 0.81763 |
| STM0191   | fhuA    | outer membrane ferrichrome receptor protein precursor      | <b>0.18</b>  | 0.65301 |
| STM0192   | fhuC    | hydroxymate-dependent iron transport protein               | <b>-0.20</b> | 0.67557 |
| STM0192   | fhuC    | hydroxymate-dependent iron transport protein               | <b>0.10</b>  | 0.88115 |
| STM0193   | fhuD    | hydroxamate-dependent iron uptake protein                  | <b>-0.11</b> | 0.78266 |
| STM0193   | fhuD    | hydroxamate-dependent iron uptake protein                  | <b>0.11</b>  | 0.82384 |
| STM0194   | fhuB    | hydroxamate-dependent iron uptake protein                  | <b>-0.10</b> | 0.80987 |
| STM0194   | fhuB    | hydroxamate-dependent iron uptake protein                  | <b>0.09</b>  | 0.86339 |
| STM0195   | stfA    | putative fimbrial subunit                                  | <b>-0.27</b> | 0.70474 |
| STM0195   | stfA    | putative fimbrial subunit                                  | <b>0.30</b>  | 0.52208 |
| STM0196   | stfC    | putative fimbrial outer membrane usher                     | <b>-0.11</b> | 0.80081 |
| STM0196   | stfC    | putative fimbrial outer membrane usher                     | <b>0.45</b>  | 0.45398 |
| STM0197   | stfD    | putative periplasmic fimbrial chaperone                    | <b>-0.86</b> | 0.13112 |
| STM0197   | stfD    | putative periplasmic fimbrial chaperone                    | <b>0.19</b>  | 0.59544 |
| STM0198   | stfE    | putative minor fimbrial subunit                            | <b>-0.32</b> | 0.54625 |
| STM0198   | stfE    | putative minor fimbrial subunit                            | <b>0.09</b>  | 0.83191 |
| STM0199   | stfF    | putative minor fimbrial subunit                            | <b>-1.34</b> | 0.19843 |
| STM0199   | stfF    | putative minor fimbrial subunit                            | <b>0.41</b>  | 0.28030 |
| STM0200   | stfG    | putative minor fimbrial subunit                            | <b>-0.05</b> | 0.90585 |
| STM0200   | stfG    | putative minor fimbrial subunit                            | <b>0.33</b>  | 0.55598 |
| STM0201   | STM0201 | putative outer membrane protein                            | <b>-0.07</b> | 0.85504 |
| STM0201   | STM0201 | putative outer membrane protein                            | <b>-0.02</b> | 0.96595 |
| STM0202   | hemL    | glutamate-1-semialdehyde aminotransferase                  | <b>-0.25</b> | 0.53676 |
| STM0202   | hemL    | glutamate-1-semialdehyde aminotransferase                  | <b>0.26</b>  | 0.71693 |
| STM0203   | yadQ    | chloride channel protein                                   | <b>-0.79</b> | 0.15859 |
| STM0203   | yadQ    | chloride channel protein                                   | <b>-0.35</b> | 0.42084 |
| STM0204,S | yadR    | hypothetical protein STM0204,S                             | <b>-0.07</b> | 0.86629 |
| STM0204,S | yadR    | hypothetical protein STM0204,S                             | <b>0.23</b>  | 0.56860 |
| STM0205   | yadS    | putative inner membrane protein                            | <b>-0.21</b> | 0.60042 |
| STM0205   | yadS    | putative inner membrane protein                            | <b>0.08</b>  | 0.87290 |
| STM0206   | btuF    | vitamin B12-transporter protein BtuF                       | <b>0.05</b>  | 0.89979 |
| STM0206   | btuF    | vitamin B12-transporter protein BtuF                       | <b>0.21</b>  | 0.62629 |
| STM0207   | pfs     | 5'-methylthioadenosine/S-adenosylhomocysteine nucleosidase | <b>-0.38</b> | 0.31305 |
| STM0207   | pfs     | 5'-methylthioadenosine/S-adenosylhomocysteine nucleosidase | <b>0.18</b>  | 0.72646 |
| STM0208   | dgt     | deoxyguanosinetriphosphate triphosphohydrolase             | <b>-0.39</b> | 0.61809 |
| STM0208   | dgt     | deoxyguanosinetriphosphate triphosphohydrolase             | <b>0.11</b>  | 0.87512 |
| STM0209   | htrA    | high temperature requirement A protein precursor           | <b>-0.06</b> | 0.90797 |
| STM0209   | htrA    | high temperature requirement A protein precursor           | <b>-0.13</b> | 0.78633 |
| STM0210   | cdaR    | putative inner membrane protein                            | <b>0.05</b>  | 0.92173 |
| STM0210   | cdaR    | putative inner membrane protein                            | <b>0.74</b>  | 0.18961 |
| STM0211   | yaeH    | putative cytoplasmic protein                               | <b>-0.10</b> | 0.86017 |
| STM0211   | yaeH    | putative cytoplasmic protein                               | <b>0.28</b>  | 0.44980 |

|         |         |                                                                |              |         |
|---------|---------|----------------------------------------------------------------|--------------|---------|
| STM0212 | STM0212 | putative inner membrane protein                                | <b>-0.05</b> | 0.91723 |
| STM0212 | STM0212 | putative inner membrane protein                                | <b>0.10</b>  | 0.82443 |
| STM0213 | dapD    | 2,3,4,5-tetrahydropyridine-2-carboxylate N-succinyltransferase | <b>-0.09</b> | 0.88018 |
| STM0213 | dapD    | 2,3,4,5-tetrahydropyridine-2-carboxylate N-succinyltransferase | <b>-0.16</b> | 0.70966 |
| STM0214 | glnD    | PII uridylyl-transferase                                       | <b>-0.03</b> | 0.94565 |
| STM0214 | glnD    | PII uridylyl-transferase                                       | <b>0.08</b>  | 0.84862 |
| STM0215 | map     | methionine aminopeptidase                                      | <b>-0.47</b> | 0.23798 |
| STM0215 | map     | methionine aminopeptidase                                      | <b>-0.22</b> | 0.61654 |
| STM0216 | rpsB    | 30S ribosomal protein S2                                       | <b>-0.09</b> | 0.80335 |
| STM0216 | rpsB    | 30S ribosomal protein S2                                       | <b>0.53</b>  | 0.24005 |
| STM0217 | tsf     | elongation factor Ts                                           | <b>-0.28</b> | 0.49499 |
| STM0217 | tsf     | elongation factor Ts                                           | <b>0.01</b>  | 0.98840 |
| STM0218 | pyrH    | uridylate kinase                                               | <b>-0.27</b> | 0.70229 |
| STM0218 | pyrH    | uridylate kinase                                               | <b>0.24</b>  | 0.68642 |
| STM0219 | frr     | ribosome releasing factor                                      | <b>-0.73</b> | 0.15799 |
| STM0219 | frr     | ribosome releasing factor                                      | <b>-0.24</b> | 0.67351 |
| STM0220 | dxr     | 1-deoxy-D-xylulose 5-phosphate reductoisomerase                | <b>-0.03</b> | 0.94426 |
| STM0220 | dxr     | 1-deoxy-D-xylulose 5-phosphate reductoisomerase                | <b>-0.21</b> | 0.66506 |
| STM0221 | uppS    | undecaprenyl pyrophosphate synthetase                          | <b>-0.08</b> | 0.85718 |
| STM0221 | uppS    | undecaprenyl pyrophosphate synthetase                          | <b>0.14</b>  | 0.73542 |
| STM0222 | cdsA    | CDP-diglyceride synthase                                       | <b>-0.04</b> | 0.94174 |
| STM0222 | cdsA    | CDP-diglyceride synthase                                       | <b>-0.02</b> | 0.97064 |
| STM0223 | yaeL    | putative membrane-associated Zn-dependent protease             | <b>0.17</b>  | 0.65983 |
| STM0223 | yaeL    | putative membrane-associated Zn-dependent protease             | <b>0.30</b>  | 0.41134 |
| STM0224 | yaeT    | putative outer membrane protein precursor                      | <b>-0.23</b> | 0.62166 |
| STM0224 | yaeT    | putative outer membrane protein precursor                      | <b>0.03</b>  | 0.94417 |
| STM0225 | hlpA    | outer membrane protein H precursor                             | <b>-0.12</b> | 0.84456 |
| STM0225 | hlpA    | outer membrane protein H precursor                             | <b>-0.23</b> | 0.65181 |
| STM0226 | lpxD    | UDP-3-O-[3-hydroxymyristoyl] glucosamine N-acyltransferase     | <b>0.05</b>  | 0.90265 |
| STM0226 | lpxD    | UDP-3-O-[3-hydroxymyristoyl] glucosamine N-acyltransferase     | <b>0.08</b>  | 0.89410 |
| STM0227 | fabZ    | (3R)-hydroxymyristoyl ACP dehydratase                          | <b>-0.08</b> | 0.85592 |
| STM0227 | fabZ    | (3R)-hydroxymyristoyl ACP dehydratase                          | <b>0.02</b>  | 0.96785 |
| STM0228 | lpxA    | UDP-N-acetylglucosamine acyltransferase                        | <b>-0.02</b> | 0.96595 |
| STM0228 | lpxA    | UDP-N-acetylglucosamine acyltransferase                        | <b>0.10</b>  | 0.82667 |
| STM0229 | lpxB    | lipid-A-disaccharide synthase                                  | <b>-0.28</b> | 0.45520 |
| STM0229 | lpxB    | lipid-A-disaccharide synthase                                  | <b>0.44</b>  | 0.30599 |
| STM0230 | rnhB    | ribonuclease HII                                               | <b>0.03</b>  | 0.94992 |
| STM0230 | rnhB    | ribonuclease HII                                               | <b>-0.41</b> | 0.34156 |
| STM0231 | dnaE    | DNA polymerase III subunit alpha                               | <b>0.00</b>  | 0.99938 |
| STM0231 | dnaE    | DNA polymerase III subunit alpha                               | <b>0.05</b>  | 0.90671 |
| STM0232 | accA    | acetyl-CoA carboxylase alpha subunit                           | <b>-0.35</b> | 0.42169 |
| STM0232 | accA    | acetyl-CoA carboxylase alpha subunit                           | <b>0.08</b>  | 0.87126 |
| STM0233 | STM0233 | putative endochitinase                                         | <b>0.07</b>  | 0.90733 |
| STM0233 | STM0233 | putative endochitinase                                         | <b>0.03</b>  | 0.95679 |
| STM0234 | ldcC    | lysine decarboxylase 2                                         | <b>-0.48</b> | 0.29285 |
| STM0234 | ldcC    | lysine decarboxylase 2                                         | <b>0.05</b>  | 0.89979 |
| STM0235 | yaeR    | putative lactoylglutathione lyase                              | <b>-0.01</b> | 0.99072 |
| STM0235 | yaeR    | putative lactoylglutathione lyase                              | <b>0.00</b>  | 0.99997 |
| STM0236 | mesJ    | cell cycle protein                                             | <b>-0.24</b> | 0.62988 |
| STM0236 | mesJ    | cell cycle protein                                             | <b>-0.04</b> | 0.95059 |
| STM0237 | rof     | Rho-dependent transcription termination modulator              | <b>-0.38</b> | 0.36162 |
| STM0237 | rof     | Rho-dependent transcription termination modulator              | <b>0.08</b>  | 0.84956 |
| STM0238 | yaeP    | hypothetical protein STM0238                                   | <b>-0.06</b> | 0.88967 |
| STM0238 | yaeP    | hypothetical protein STM0238                                   | <b>0.00</b>  | 0.99698 |
| STM0239 | yaeQ    | putative cytoplasmic protein                                   | <b>-0.12</b> | 0.78877 |
| STM0239 | yaeQ    | putative cytoplasmic protein                                   | <b>0.07</b>  | 0.88466 |
| STM0240 | yaeJ    | hypothetical protein STM0240                                   | <b>-0.23</b> | 0.58387 |
| STM0240 | yaeJ    | hypothetical protein STM0240                                   | <b>0.41</b>  | 0.34148 |
| STM0242 | proS    | prolyl-tRNA synthetase                                         | <b>0.83</b>  | 0.30087 |

|           |           |                                          |              |         |
|-----------|-----------|------------------------------------------|--------------|---------|
| STM0242   | proS      | prolyl-tRNA synthetase                   | <b>1.21</b>  | 0.30611 |
| STM0243   | yaeB      | putative regulatory protein              | <b>-0.24</b> | 0.51385 |
| STM0243   | yaeB      | putative regulatory protein              | <b>0.06</b>  | 0.92308 |
| STM0244   | rscF      | colanic acid synthesis regulator         | <b>0.00</b>  | 0.99938 |
| STM0244   | rscF      | colanic acid synthesis regulator         | <b>0.08</b>  | 0.87512 |
| STM0245   | yaeC      | putative outer membrane lipoprotein      | <b>-0.34</b> | 0.64975 |
| STM0245   | yaeC      | putative outer membrane lipoprotein      | <b>0.05</b>  | 0.90534 |
| STM0246   | yaeE      | putative transport protein               | <b>-0.02</b> | 0.97348 |
| STM0246   | yaeE      | putative transport protein               | <b>0.03</b>  | 0.95505 |
| STM0247   | abc       | putative transport protein               | <b>0.05</b>  | 0.93485 |
| STM0247   | abc       | putative transport protein               | <b>0.23</b>  | 0.51267 |
| STM0248   | yaeD      | hypothetical protein STM0248             | <b>-0.72</b> | 0.21747 |
| STM0248   | yaeD      | hypothetical protein STM0248             | <b>0.07</b>  | 0.91600 |
| STM0249   | rrsH      | STM0249                                  | <b>-0.49</b> | 0.37178 |
| STM0249   | rrsH      | STM0249                                  | <b>-0.46</b> | 0.49870 |
| STM0252   | rrlH      | STM0252                                  | <b>-0.37</b> | 0.50736 |
| STM0252   | rrlH      | STM0252                                  | <b>-0.50</b> | 0.31004 |
| STM0255   | yafB      | 2,5-diketo-D-gluconate reductase B       | <b>-0.04</b> | 0.96107 |
| STM0255   | yafB      | 2,5-diketo-D-gluconate reductase B       | <b>0.27</b>  | 0.63742 |
| STM0256   | yafC      | putative transcriptional regulator       | <b>-0.10</b> | 0.87356 |
| STM0256   | yafC      | putative transcriptional regulator       | <b>-0.09</b> | 0.85534 |
| STM0257   | STM0257   | putative drug efflux protein             | <b>0.30</b>  | 0.40337 |
| STM0257   | STM0257   | putative drug efflux protein             | <b>0.79</b>  | 0.12784 |
| STM0258   | yafD      | hypothetical protein STM0258             | <b>-0.25</b> | 0.57026 |
| STM0258   | yafD      | hypothetical protein STM0258             | <b>0.13</b>  | 0.76622 |
| STM0259   | yafE      | putative methyltransferase               | <b>-0.38</b> | 0.34148 |
| STM0259   | yafE      | putative methyltransferase               | <b>0.13</b>  | 0.77346 |
| STM0260   | dniR      | transcriptional regulator                | <b>-0.09</b> | 0.84436 |
| STM0260   | dniR      | transcriptional regulator                | <b>0.40</b>  | 0.37942 |
| STM0261   | gloB      | hydroxyacylglutathione hydrolase         | <b>-0.12</b> | 0.85358 |
| STM0261   | gloB      | hydroxyacylglutathione hydrolase         | <b>0.40</b>  | 0.42940 |
| STM0262   | yafS      | putative SAM-dependent methyltransferase | <b>-0.48</b> | 0.35635 |
| STM0262   | yafS      | putative SAM-dependent methyltransferase | <b>0.09</b>  | 0.86017 |
| STM0263   | rnhA      | ribonuclease H                           | <b>-0.18</b> | 0.76387 |
| STM0263   | rnhA      | ribonuclease H                           | <b>0.06</b>  | 0.92994 |
| STM0264   | dnaQ      | DNA polymerase III subunit epsilon       | <b>0.10</b>  | 0.81896 |
| STM0264   | dnaQ      | DNA polymerase III subunit epsilon       | <b>0.07</b>  | 0.93554 |
| STM0266   | STM0266   | putative cytoplasmic protein             | <b>-0.42</b> | 0.36818 |
| STM0266   | STM0266   | putative cytoplasmic protein             | <b>0.16</b>  | 0.80637 |
| STM0267   | STM0267   | putative cytoplasmic protein             | <b>0.03</b>  | 0.95532 |
| STM0267   | STM0267   | putative cytoplasmic protein             | <b>0.22</b>  | 0.54160 |
| STM0268   | STM0268   | putative cytoplasmic protein             | <b>0.49</b>  | 0.48447 |
| STM0268   | STM0268   | putative cytoplasmic protein             | <b>1.14</b>  | 0.18614 |
| STM0269   | STM0269   | putative cytoplasmic protein             | <b>-0.74</b> | 0.18248 |
| STM0269   | STM0269   | putative cytoplasmic protein             | <b>-0.82</b> | 0.52419 |
| STM0270   | STM0270   | putative cytoplasmic protein             | <b>-0.11</b> | 0.83190 |
| STM0270   | STM0270   | putative cytoplasmic protein             | <b>0.16</b>  | 0.75075 |
| STM0271   | STM0271   | putative cytoplasmic protein             | <b>-1.26</b> | 0.09304 |
| STM0271   | STM0271   | putative cytoplasmic protein             | <b>-0.34</b> | 0.68070 |
| STM0272   | STM0272   | putative chaperone ATPase                | <b>0.09</b>  | 0.91674 |
| STM0272   | STM0272   | putative chaperone ATPase                | <b>0.06</b>  | 0.93846 |
| STM0273   | STM0273   | putative cytoplasmic protein             | <b>-0.20</b> | 0.78211 |
| STM0273   | STM0273   | putative cytoplasmic protein             | <b>0.06</b>  | 0.93023 |
| STM0274   | STM0274   | putative cytoplasmic protein             | <b>-0.39</b> | 0.65730 |
| STM0274   | STM0274   | putative cytoplasmic protein             | <b>0.91</b>  | 0.35350 |
| STM0275,s | STM0275,s | putative cytoplasmic protein             | <b>-0.07</b> | 0.93778 |
| STM0275,s | STM0275,s | putative cytoplasmic protein             | <b>0.62</b>  | 0.37142 |
| STM0276   | STM0276   | putative cytoplasmic protein             | <b>-0.32</b> | 0.46793 |
| STM0276   | STM0276   | putative cytoplasmic protein             | <b>0.79</b>  | 0.35564 |
| STM0277   | STM0277   | putative cytoplasmic protein             | <b>0.12</b>  | 0.83443 |
| STM0277   | STM0277   | putative cytoplasmic protein             | <b>0.59</b>  | 0.31280 |
| STM0278   | STM0278   | putative periplasmic protein             | <b>-0.15</b> | 0.84911 |
| STM0278   | STM0278   | putative periplasmic protein             | <b>0.35</b>  | 0.61201 |

|            |            |                                      |              |         |
|------------|------------|--------------------------------------|--------------|---------|
| STM0279    | STM0279    | putative cytoplasmic protein         | <b>0.83</b>  | 0.41676 |
| STM0279    | STM0279    | putative cytoplasmic protein         | <b>0.70</b>  | 0.35245 |
| STM0280    | STM0280    | putative outer membrane lipoprotein  | <b>-0.24</b> | 0.70065 |
| STM0280    | STM0280    | putative outer membrane lipoprotein  | <b>0.33</b>  | 0.56563 |
| STM0281    | STM0281    | putative cytoplasmic protein         | <b>0.00</b>  | 0.99500 |
| STM0281    | STM0281    | putative cytoplasmic protein         | <b>0.57</b>  | 0.38947 |
| STM0282    | STM0282    | hypothetical protein STM0282         | <b>-0.06</b> | 0.94223 |
| STM0282    | STM0282    | hypothetical protein STM0282         | <b>-0.20</b> | 0.75376 |
| STM0283    | STM0283    | putative inner membrane protein      | <b>-0.50</b> | 0.35824 |
| STM0283    | STM0283    | putative inner membrane protein      | <b>-0.02</b> | 0.98558 |
| STM0284    | STM0284    | putative Shiga-like toxin A subunit  | <b>-0.23</b> | 0.54882 |
| STM0284    | STM0284    | putative Shiga-like toxin A subunit  | <b>-0.20</b> | 0.68528 |
| STM0285    | STM0285    | putative inner membrane protein      | <b>0.13</b>  | 0.78844 |
| STM0285    | STM0285    | putative inner membrane protein      | <b>0.94</b>  | 0.16783 |
| STM0286    | STM0286    | putative cytoplasmic protein         | <b>-0.55</b> | 0.25195 |
| STM0286    | STM0286    | putative cytoplasmic protein         | <b>0.08</b>  | 0.92658 |
| STM0287    | STM0287    | putative periplasmic protein         | <b>-0.27</b> | 0.54618 |
| STM0287    | STM0287    | putative periplasmic protein         | <b>0.37</b>  | 0.45797 |
| STM0288    | STM0288    | putative cytoplasmic protein         | <b>-0.15</b> | 0.80415 |
| STM0288    | STM0288    | putative cytoplasmic protein         | <b>0.50</b>  | 0.32590 |
| STM0289    | STM0289    | putative cytoplasmic protein         | <b>-0.65</b> | 0.31971 |
| STM0289    | STM0289    | putative cytoplasmic protein         | <b>0.14</b>  | 0.82494 |
| STM0290    | STM0290    | putative cytoplasmic protein         | <b>0.14</b>  | 0.87999 |
| STM0290    | STM0290    | putative cytoplasmic protein         | <b>0.68</b>  | 0.15799 |
| STM0291    | STM0291    | putative RHS-like protein            | <b>-0.37</b> | 0.52511 |
| STM0291    | STM0291    | putative RHS-like protein            | <b>0.20</b>  | 0.65795 |
| STM0292    | STM0292    | putative RHS-like protein            | <b>-0.08</b> | 0.87512 |
| STM0292    | STM0292    | putative RHS-like protein            | <b>-0.03</b> | 0.95564 |
| STM0293    | STM0293    | putative cytoplasmic protein         | <b>-0.19</b> | 0.72398 |
| STM0293    | STM0293    | putative cytoplasmic protein         | <b>-0.11</b> | 0.83003 |
| STM0294    | STM0294    | putative cytoplasmic protein         | <b>-0.31</b> | 0.42811 |
| STM0294    | STM0294    | putative cytoplasmic protein         | <b>-0.14</b> | 0.80306 |
| STM0294,1N | STM0294,1N | hypothetical protein STM0294,1N      | <b>0.31</b>  | 0.63958 |
| STM0294,1N | STM0294,1N | hypothetical protein STM0294,1N      | <b>0.43</b>  | 0.84634 |
| STM0295    | STM0295    | putative cytoplasmic protein         | <b>-0.39</b> | 0.55482 |
| STM0295    | STM0295    | putative cytoplasmic protein         | <b>-0.13</b> | 0.86947 |
| STM0300    | safB       | putative fimbrial assembly chaperone | <b>-0.47</b> | 0.46772 |
| STM0300    | safB       | putative fimbrial assembly chaperone | <b>0.82</b>  | 0.24125 |
| STM0301    | safC       | putative fimbrial usher              | <b>0.49</b>  | 0.32760 |
| STM0301    | safC       | putative fimbrial usher              | <b>-0.05</b> | 0.92074 |
| STM0302    | safD       | putative fimbrial subunit            | <b>-0.56</b> | 0.19967 |
| STM0302    | safD       | putative fimbrial subunit            | <b>-0.09</b> | 0.85706 |
| STM0303    | ybeJ       | putative xylanase/chitin deacetylase | <b>0.22</b>  | 0.59160 |
| STM0303    | ybeJ       | putative xylanase/chitin deacetylase | <b>0.48</b>  | 0.35325 |
| STM0304    | sinR       | transcriptional regulator            | <b>0.03</b>  | 0.96344 |
| STM0304    | sinR       | transcriptional regulator            | <b>0.02</b>  | 0.96278 |
| STM0306    | STM0306    | SapA-like protein                    | <b>-0.61</b> | 0.17919 |
| STM0306    | STM0306    | SapA-like protein                    | <b>0.01</b>  | 0.99447 |
| STM0307    | STM0307    | VirG-like protein                    | <b>-0.95</b> | 0.16425 |
| STM0307    | STM0307    | VirG-like protein                    | <b>-0.13</b> | 0.77923 |
| STM0308    | yafV       | putative amidohydrolase              | <b>0.03</b>  | 0.96850 |
| STM0308    | yafV       | putative amidohydrolase              | <b>0.21</b>  | 0.65383 |
| STM0309    | fadE       | acyl-CoA dehydrogenase               | <b>-0.37</b> | 0.44969 |
| STM0309    | fadE       | acyl-CoA dehydrogenase               | <b>0.08</b>  | 0.92264 |
| STM0310    | ghmA       | phosphoheptose isomerase             | <b>-0.15</b> | 0.70966 |
| STM0310    | ghmA       | phosphoheptose isomerase             | <b>-0.13</b> | 0.81455 |
| STM0311    | yafJ       | putative glutamine amidotransferase  | <b>-0.21</b> | 0.63003 |
| STM0311    | yafJ       | putative glutamine amidotransferase  | <b>0.12</b>  | 0.80355 |
| STM0312    | yafK       | putative periplasmic protein         | <b>-0.29</b> | 0.40947 |
| STM0312    | yafK       | putative periplasmic protein         | <b>-0.02</b> | 0.96850 |
| STM0313    | dinP       | DNA polymerase IV                    | <b>-0.23</b> | 0.56162 |
| STM0313    | dinP       | DNA polymerase IV                    | <b>0.61</b>  | 0.55945 |
| STM0315    | prfH       | peptide chain release factor 2       | <b>0.17</b>  | 0.67551 |

|           |           |                                         |              |         |
|-----------|-----------|-----------------------------------------|--------------|---------|
| STM0315   | prfH      | peptide chain release factor 2          | <b>0.06</b>  | 0.89468 |
| STM0316   | pepD      | aminoacyl-histidine dipeptidase         | <b>-0.44</b> | 0.24520 |
| STM0316   | pepD      | aminoacyl-histidine dipeptidase         | <b>-0.40</b> | 0.36628 |
| STM0317   | gpt       | xanthine phosphoribosyltransferase      | <b>0.00</b>  | 0.99713 |
| STM0317   | gpt       | xanthine phosphoribosyltransferase      | <b>0.28</b>  | 0.44020 |
| STM0318   | yafA      | hypothetical protein STM0318            | <b>0.20</b>  | 0.66636 |
| STM0318   | yafA      | hypothetical protein STM0318            | <b>0.50</b>  | 0.32760 |
| STM0319   | crl       | transcriptional regulator               | <b>0.38</b>  | 0.37241 |
| STM0319   | crl       | transcriptional regulator               | <b>0.37</b>  | 0.41812 |
| STM0320   | phoE      | outer membrane pore protein E precursor | <b>0.79</b>  | 0.31305 |
| STM0320   | phoE      | outer membrane pore protein E precursor | <b>0.69</b>  | 0.19142 |
| STM0321   | proB      | gamma-glutamyl kinase                   | <b>-0.16</b> | 0.74779 |
| STM0321   | proB      | gamma-glutamyl kinase                   | <b>0.31</b>  | 0.59820 |
| STM0322   | proA      | gamma-glutamyl phosphate reductase      | <b>-0.16</b> | 0.72861 |
| STM0322   | proA      | gamma-glutamyl phosphate reductase      | <b>0.21</b>  | 0.58788 |
| STM0323   | thrW      | STM0323                                 | <b>0.38</b>  | 0.62814 |
| STM0323   | thrW      | STM0323                                 | <b>0.49</b>  | 0.28799 |
| STM0325   | STM0325   | putative truncated IS3 transposase      | <b>-0.70</b> | 0.30607 |
| STM0325   | STM0325   | putative truncated IS3 transposase      | <b>0.14</b>  | 0.83223 |
| STM0327   | STM0327   | putative cytoplasmic protein            | <b>0.07</b>  | 0.90609 |
| STM0327   | STM0327   | putative cytoplasmic protein            | <b>0.55</b>  | 0.31458 |
| STM0328,s | STM0328,s | putative permease                       | <b>-0.20</b> | 0.76538 |
| STM0328,s | STM0328,s | putative permease                       | <b>0.11</b>  | 0.81061 |
| STM0329   | STM0329   | isopropylmalate isomerase large subunit | <b>-0.15</b> | 0.75165 |
| STM0329   | STM0329   | isopropylmalate isomerase large subunit | <b>0.27</b>  | 0.55598 |
| STM0330   | STM0330   | putative 3-isopropylmalate isomerase    | <b>0.39</b>  | 0.46629 |
| STM0330   | STM0330   | putative 3-isopropylmalate isomerase    | <b>0.63</b>  | 0.32760 |
| STM0331   | STM0331   | putative fumarylacetoacetate hydrolase  | <b>-0.71</b> | 0.35824 |
| STM0331   | STM0331   | putative fumarylacetoacetate hydrolase  | <b>-0.15</b> | 0.82624 |
| STM0332   | STM0332   | putative hydrolase/acyltransferase      | <b>-0.19</b> | 0.68032 |
| STM0332   | STM0332   | putative hydrolase/acyltransferase      | <b>0.01</b>  | 0.99447 |
| STM0333   | STM0333   | putative transcriptional regulator      | <b>0.16</b>  | 0.78010 |
| STM0333   | STM0333   | putative transcriptional regulator      | <b>0.59</b>  | 0.23918 |
| STM0335   | STM0335   | putative outer membrane protein         | <b>-0.47</b> | 0.37153 |
| STM0335   | STM0335   | putative outer membrane protein         | <b>0.09</b>  | 0.88770 |
| STM0336   | stbE      | putative fimbrial chaperone             | <b>-0.11</b> | 0.86626 |
| STM0336   | stbE      | putative fimbrial chaperone             | <b>0.65</b>  | 0.20065 |
| STM0337   | stbD      | putative fimbrial usher                 | <b>-0.56</b> | 0.42580 |
| STM0337   | stbD      | putative fimbrial usher                 | <b>0.24</b>  | 0.73968 |
| STM0338   | stbC      | putative fimbrial usher                 | <b>-0.15</b> | 0.76387 |
| STM0338   | stbC      | putative fimbrial usher                 | <b>0.17</b>  | 0.81272 |
| STM0339   | stbB      | putative fimbrial chaperone             | <b>-0.62</b> | 0.24515 |
| STM0339   | stbB      | putative fimbrial chaperone             | <b>-0.42</b> | 0.74378 |
| STM0340   | stbA      | putative fimbrial major subunit         | <b>-0.53</b> | 0.45487 |
| STM0340   | stbA      | putative fimbrial major subunit         | <b>0.35</b>  | 0.62861 |
| STM0341   | STM0341   | putative inner membrane protein         | <b>-0.06</b> | 0.90277 |
| STM0341   | STM0341   | putative inner membrane protein         | <b>0.49</b>  | 0.45643 |
| STM0342   | STM0342   | putative periplasmic protein            | <b>0.30</b>  | 0.62975 |
| STM0342   | STM0342   | putative periplasmic protein            | <b>0.28</b>  | 0.42935 |
| STM0343   | STM0343   | hypothetical protein STM0343            | <b>-0.78</b> | 0.16534 |
| STM0343   | STM0343   | hypothetical protein STM0343            | <b>-0.03</b> | 0.96251 |
| STM0344   | STM0344   | putative response regulator             | <b>-0.02</b> | 0.97267 |
| STM0344   | STM0344   | putative response regulator             | <b>0.61</b>  | 0.24163 |
| STM0345   | STM0345   | putative inner membrane protein         | <b>-0.27</b> | 0.51039 |
| STM0345   | STM0345   | putative inner membrane protein         | <b>0.09</b>  | 0.87126 |
| STM0346   | STM0346   | putative outer membrane protein         | <b>-0.39</b> | 0.47804 |
| STM0346   | STM0346   | putative outer membrane protein         | <b>0.45</b>  | 0.42266 |
| STM0347   | STM0347   | putative response regulator             | <b>-0.77</b> | 0.23989 |
| STM0347   | STM0347   | putative response regulator             | <b>0.17</b>  | 0.79308 |
| STM0348   | STM0348   | putative inner membrane protein         | <b>-0.46</b> | 0.63974 |
| STM0348   | STM0348   | putative inner membrane protein         | <b>-0.21</b> | 0.81862 |
| STM0349   | STM0349   | putative outer membrane lipoprotein     | <b>-0.13</b> | 0.83443 |
| STM0349   | STM0349   | putative outer membrane lipoprotein     | <b>0.62</b>  | 0.30481 |

|           |           |                                            |              |         |
|-----------|-----------|--------------------------------------------|--------------|---------|
| STM0350,S | STM0350,S | outer membrane efflux-like protein         | <b>-0.62</b> | 0.27893 |
| STM0350,S | STM0350,S | outer membrane efflux-like protein         | <b>0.26</b>  | 0.66026 |
| STM0351   | STM0351   | putative cation efflux system protein      | <b>-0.50</b> | 0.31823 |
| STM0351   | STM0351   | putative cation efflux system protein      | <b>0.34</b>  | 0.54094 |
| STM0352,S | STM0352,S | putative cation efflux pump                | <b>-0.41</b> | 0.40412 |
| STM0352,S | STM0352,S | putative cation efflux pump                | <b>0.22</b>  | 0.58965 |
| STM0353   | STM0353   | putative cation transport ATPase           | <b>0.06</b>  | 0.92840 |
| STM0353   | STM0353   | putative cation transport ATPase           | <b>1.02</b>  | 0.26429 |
| STM0354   | STM0354   | putative transcriptional regulator         | <b>0.01</b>  | 0.98840 |
| STM0354   | STM0354   | putative transcriptional regulator         | <b>1.00</b>  | 0.21562 |
| STM0355   | STM0355   | putative copper chaperone                  | <b>0.05</b>  | 0.91937 |
| STM0355   | STM0355   | putative copper chaperone                  | <b>0.98</b>  | 0.11224 |
| STM0356   | STM0356   | putative inner membrane protein            | <b>0.07</b>  | 0.87909 |
| STM0356   | STM0356   | putative inner membrane protein            | <b>-0.24</b> | 0.69192 |
| STM0357   | mod       | DNA methylase                              | <b>0.41</b>  | 0.34051 |
| STM0357   | mod       | DNA methylase                              | <b>0.28</b>  | 0.55338 |
| STM0358,S | res       | DNA restriction enzyme                     | <b>-0.32</b> | 0.37821 |
| STM0358,S | res       | DNA restriction enzyme                     | <b>0.08</b>  | 0.89979 |
| STM0359   | STM0359   | putative cytoplasmic protein               | <b>0.34</b>  | 0.87368 |
| STM0359   | STM0359   | putative cytoplasmic protein               | <b>1.00</b>  | 0.44416 |
| STM0360   | STM0360   | cytochrome BD2 subunit I                   | <b>-0.14</b> | 0.83943 |
| STM0360   | STM0360   | cytochrome BD2 subunit I                   | <b>0.30</b>  | 0.52571 |
| STM0361   | STM0361   | cytochrome BD2 subunit II                  | <b>-0.46</b> | 0.38875 |
| STM0361   | STM0361   | cytochrome BD2 subunit II                  | <b>-0.04</b> | 0.93960 |
| STM0363   | STM0363   | putative transcriptional regulator         | <b>0.01</b>  | 0.98140 |
| STM0363   | STM0363   | putative transcriptional regulator         | <b>-1.21</b> | 0.64422 |
| STM0364   | foxA      | ferrioxamine receptor                      | <b>-0.03</b> | 0.95081 |
| STM0364   | foxA      | ferrioxamine receptor                      | <b>0.05</b>  | 0.95219 |
| STM0365   | yahN      | putative transport protein                 | <b>-0.18</b> | 0.77567 |
| STM0365   | yahN      | putative transport protein                 | <b>0.17</b>  | 0.81142 |
| STM0366   | yahO      | putative periplasmic protein               | <b>0.16</b>  | 0.82624 |
| STM0366   | yahO      | putative periplasmic protein               | <b>0.98</b>  | 0.37942 |
| STM0367   | prpR      | prp operon regulator                       | <b>0.26</b>  | 0.62691 |
| STM0367   | prpR      | prp operon regulator                       | <b>0.31</b>  | 0.52142 |
| STM0368   | prpB      | putative carboxyphosphoenolpyruvate mutase | <b>-1.18</b> | 0.14043 |
| STM0368   | prpB      | putative carboxyphosphoenolpyruvate mutase | <b>-0.03</b> | 0.96655 |
| STM0369   | prpC      | citrate synthase                           | <b>0.15</b>  | 0.70545 |
| STM0369   | prpC      | citrate synthase                           | <b>0.98</b>  | 0.17139 |
| STM0370   | prpD      | 2-methylcitrate dehydratase                | <b>-0.20</b> | 0.60891 |
| STM0370   | prpD      | 2-methylcitrate dehydratase                | <b>0.20</b>  | 0.82637 |
| STM0371   | prpE      | putative acetyl-CoA synthetase             | <b>-0.39</b> | 0.33356 |
| STM0371   | prpE      | putative acetyl-CoA synthetase             | <b>0.36</b>  | 0.42106 |
| STM0372   | hemB      | delta-aminolevulinic acid dehydratase      | <b>0.10</b>  | 0.82975 |
| STM0372   | hemB      | delta-aminolevulinic acid dehydratase      | <b>-0.07</b> | 0.87844 |
| STM0373   | yaiU      | flagellar protein                          | <b>-0.11</b> | 0.82656 |
| STM0373   | yaiU      | flagellar protein                          | <b>0.68</b>  | 0.37241 |
| STM0374   | yaiV      | putative inner membrane protein            | <b>-0.15</b> | 0.85492 |
| STM0374   | yaiV      | putative inner membrane protein            | <b>0.36</b>  | 0.55338 |
| STM0375   | ampH      | penicillin-binding protein                 | <b>-0.35</b> | 0.59675 |
| STM0375   | ampH      | penicillin-binding protein                 | <b>0.16</b>  | 0.77152 |
| STM0376   | sbmA      | putative ABC transporter membrane protein  | <b>-0.87</b> | 0.11913 |
| STM0376   | sbmA      | putative ABC transporter membrane protein  | <b>-0.34</b> | 0.44271 |
| STM0377   | yaiW      | putative outer membrane lipoprotein        | <b>-0.44</b> | 0.45797 |
| STM0377   | yaiW      | putative outer membrane lipoprotein        | <b>0.30</b>  | 0.54288 |
| STM0378   | yaiY      | putative inner membrane protein            | <b>-0.23</b> | 0.57686 |
| STM0378   | yaiY      | putative inner membrane protein            | <b>0.12</b>  | 0.83901 |
| STM0379   | yaiZ      | putative inner membrane protein            | <b>-0.27</b> | 0.59974 |
| STM0379   | yaiZ      | putative inner membrane protein            | <b>0.02</b>  | 0.97200 |
| STM0380   | ddl       | D-alanylalanine synthetase                 | <b>-0.32</b> | 0.45462 |
| STM0380   | ddl       | D-alanylalanine synthetase                 | <b>0.19</b>  | 0.69398 |
| STM0381   | STM0381   | putative inner membrane protein            | <b>-0.33</b> | 0.56565 |
| STM0381   | STM0381   | putative inner membrane protein            | <b>1.16</b>  | 0.18417 |
| STM0382   | STM0382   | putative permease                          | <b>-0.76</b> | 0.13813 |

|         |         |                                                        |              |         |
|---------|---------|--------------------------------------------------------|--------------|---------|
| STM0382 | STM0382 | putative permease                                      | <b>-0.17</b> | 0.73473 |
| STM0383 | yaiB    | putative cytoplasmic protein                           | <b>-0.48</b> | 0.20129 |
| STM0383 | yaiB    | putative cytoplasmic protein                           | <b>-0.25</b> | 0.52364 |
| STM0384 | psiF    | phosphate starvation-inducible protein                 | <b>-0.60</b> | 0.30496 |
| STM0384 | psiF    | phosphate starvation-inducible protein                 | <b>-0.48</b> | 0.45800 |
| STM0385 | yaiC    | hypothetical protein STM0385                           | <b>-0.51</b> | 0.22393 |
| STM0385 | yaiC    | hypothetical protein STM0385                           | <b>-0.12</b> | 0.84162 |
| STM0386 | proC    | pyrroline-5-carboxylate reductase                      | <b>-0.29</b> | 0.53840 |
| STM0386 | proC    | pyrroline-5-carboxylate reductase                      | <b>-0.25</b> | 0.61367 |
| STM0387 | yaiI    | hypothetical protein STM0387                           | <b>-0.63</b> | 0.34110 |
| STM0387 | yaiI    | hypothetical protein STM0387                           | <b>0.24</b>  | 0.69882 |
| STM0388 | aroL    | shikimate kinase II                                    | <b>0.07</b>  | 0.87187 |
| STM0388 | aroL    | shikimate kinase II                                    | <b>0.29</b>  | 0.59887 |
| STM0389 | yaiA    | putative cytoplasmic protein                           | <b>0.00</b>  | 0.99929 |
| STM0389 | yaiA    | putative cytoplasmic protein                           | <b>0.90</b>  | 0.22283 |
| STM0390 | aroM    | aro operon protein                                     | <b>-0.05</b> | 0.94360 |
| STM0390 | aroM    | aro operon protein                                     | <b>-0.02</b> | 0.96785 |
| STM0391 | yaiE    | putative cytoplasmic protein                           | <b>0.15</b>  | 0.71367 |
| STM0391 | yaiE    | putative cytoplasmic protein                           | <b>0.33</b>  | 0.47553 |
| STM0392 | rdgC    | recombination associated protein                       | <b>-0.40</b> | 0.34666 |
| STM0392 | rdgC    | recombination associated protein                       | <b>-0.02</b> | 0.98026 |
| STM0393 | yajF    | putative sugar kinase/transcriptional regulator        | <b>-0.09</b> | 0.89730 |
| STM0393 | yajF    | putative sugar kinase/transcriptional regulator        | <b>0.34</b>  | 0.46207 |
| STM0394 | araJ    | arabinose polymer transporter                          | <b>-0.36</b> | 0.61229 |
| STM0394 | araJ    | arabinose polymer transporter                          | <b>-0.09</b> | 0.90534 |
| STM0395 | sbcC    | ATP-dependent dsDNA exonuclease                        | <b>-0.20</b> | 0.67390 |
| STM0395 | sbcC    | ATP-dependent dsDNA exonuclease                        | <b>0.96</b>  | 0.13824 |
| STM0396 | sbcD    | ATP-dependent dsDNA exonuclease                        | <b>0.22</b>  | 0.76989 |
| STM0396 | sbcD    | ATP-dependent dsDNA exonuclease                        | <b>0.53</b>  | 0.31751 |
| STM0397 | phoB    | response regulator                                     | <b>0.30</b>  | 0.54194 |
| STM0397 | phoB    | response regulator                                     | <b>1.03</b>  | 0.25460 |
| STM0398 | phoR    | sensor kinase                                          | <b>-0.41</b> | 0.32755 |
| STM0398 | phoR    | sensor kinase                                          | <b>-0.02</b> | 0.97219 |
| STM0399 | brnQ    | branched-chain amino acid transporter                  | <b>-0.10</b> | 0.86190 |
| STM0399 | brnQ    | branched-chain amino acid transporter                  | <b>0.48</b>  | 0.39385 |
| STM0400 | proY    | putative proline transporter                           | <b>-0.01</b> | 0.98551 |
| STM0400 | proY    | putative proline transporter                           | <b>-0.10</b> | 0.83190 |
| STM0401 | malZ    | maltodextrin glucosidase                               | <b>0.07</b>  | 0.85492 |
| STM0401 | malZ    | maltodextrin glucosidase                               | <b>0.39</b>  | 0.37250 |
| STM0402 | STM0402 | putative thiol-alkyl hydroperoxide reductase           | <b>0.17</b>  | 0.62691 |
| STM0402 | STM0402 | putative thiol-alkyl hydroperoxide reductase           | <b>0.64</b>  | 0.19843 |
| STM0403 | yajB    | putative cytoplasmic protein                           | <b>0.04</b>  | 0.94318 |
| STM0403 | yajB    | putative cytoplasmic protein                           | <b>0.03</b>  | 0.96251 |
| STM0404 | queA    | S-adenosylmethionine:tRNA ribosyltransferase-isomerase | <b>-0.02</b> | 0.97333 |
| STM0404 | queA    | S-adenosylmethionine:tRNA ribosyltransferase-isomerase | <b>0.19</b>  | 0.67097 |
| STM0405 | tgt     | queuine tRNA-ribosyltransferase                        | <b>0.04</b>  | 0.92371 |
| STM0405 | tgt     | queuine tRNA-ribosyltransferase                        | <b>0.17</b>  | 0.62757 |
| STM0406 | yajC    | preprotein translocase subunit YajC                    | <b>-0.06</b> | 0.89668 |
| STM0406 | yajC    | preprotein translocase subunit YajC                    | <b>0.02</b>  | 0.95932 |
| STM0407 | secD    | protein export protein SecD                            | <b>-0.30</b> | 0.38260 |
| STM0407 | secD    | protein export protein SecD                            | <b>-0.16</b> | 0.69668 |
| STM0408 | secF    | protein export protein SecF                            | <b>-0.05</b> | 0.93767 |
| STM0408 | secF    | protein export protein SecF                            | <b>0.67</b>  | 0.21933 |
| STM0409 | STM0409 | hypothetical protein STM0409                           | <b>-0.20</b> | 0.56860 |
| STM0409 | STM0409 | hypothetical protein STM0409                           | <b>-0.14</b> | 0.76955 |
| STM0410 | STM0410 | putative regulatory protein                            | <b>0.31</b>  | 0.39002 |
| STM0410 | STM0410 | putative regulatory protein                            | <b>0.36</b>  | 0.36989 |
| STM0411 | yajD    | putative cytoplasmic protein                           | <b>-0.03</b> | 0.95747 |
| STM0411 | yajD    | putative cytoplasmic protein                           | <b>0.38</b>  | 0.38722 |
| STM0413 | tsx     | nucleoside channel                                     | <b>0.47</b>  | 0.43799 |
| STM0413 | tsx     | nucleoside channel                                     | <b>1.28</b>  | 0.16281 |

|           |         |                                                  |              |         |
|-----------|---------|--------------------------------------------------|--------------|---------|
| STM0415   | ybaD    | hypothetical protein STM0415                     | <b>0.07</b>  | 0.86626 |
| STM0415   | ybaD    | hypothetical protein STM0415                     | <b>0.20</b>  | 0.57659 |
| STM0416   | ribD    | pyrimidine deaminase/reductase                   | <b>-0.43</b> | 0.43219 |
| STM0416   | ribD    | pyrimidine deaminase/reductase                   | <b>-0.26</b> | 0.55825 |
| STM0417   | ribH    | riboflavin synthase subunit beta                 | <b>-0.03</b> | 0.94402 |
| STM0417   | ribH    | riboflavin synthase subunit beta                 | <b>0.18</b>  | 0.64070 |
| STM0418   | nusB    | transcription antitermination protein NusB       | <b>-0.24</b> | 0.53679 |
| STM0418   | nusB    | transcription antitermination protein NusB       | <b>-0.19</b> | 0.61833 |
| STM0419   | thiL    | thiamine monophosphate kinase                    | <b>-0.08</b> | 0.86587 |
| STM0419   | thiL    | thiamine monophosphate kinase                    | <b>-0.10</b> | 0.83240 |
| STM0420   | pgpA    | phosphatidylglycerophosphatase A                 | <b>0.03</b>  | 0.95059 |
| STM0420   | pgpA    | phosphatidylglycerophosphatase A                 | <b>0.28</b>  | 0.52101 |
| STM0421   | yajO    | putative oxidoreductase                          | <b>-0.84</b> | 0.18265 |
| STM0421   | yajO    | putative oxidoreductase                          | <b>0.16</b>  | 0.69988 |
| STM0422   | dxs     | 1-deoxy-D-xylulose-5-phosphate synthase          | <b>-0.41</b> | 0.31637 |
| STM0422   | dxs     | 1-deoxy-D-xylulose-5-phosphate synthase          | <b>0.33</b>  | 0.35853 |
| STM0423   | ispA    | geranyltranstransferase                          | <b>-0.05</b> | 0.93150 |
| STM0423   | ispA    | geranyltranstransferase                          | <b>0.15</b>  | 0.82350 |
| STM0424   | xseB    | exodeoxyribonuclease VII small subunit           | <b>-0.20</b> | 0.63432 |
| STM0424   | xseB    | exodeoxyribonuclease VII small subunit           | <b>0.12</b>  | 0.76553 |
| STM0425   | thiI    | thiamine biosynthesis protein ThiI               | <b>0.32</b>  | 0.43550 |
| STM0425   | thiI    | thiamine biosynthesis protein ThiI               | <b>0.53</b>  | 0.20540 |
| STM0426   | phnV    | 2-aminoethylphosphonate transporter              | <b>-0.46</b> | 0.38729 |
| STM0426   | phnV    | 2-aminoethylphosphonate transporter              | <b>-0.36</b> | 0.32093 |
| STM0427   | phnU    | 2-aminoethylphosphonate transporter              | <b>0.02</b>  | 0.96687 |
| STM0427   | phnU    | 2-aminoethylphosphonate transporter              | <b>0.08</b>  | 0.91937 |
| STM0428   | phnT    | 2-aminoethylphosphonate transporter              | <b>0.02</b>  | 0.97835 |
| STM0428   | phnT    | 2-aminoethylphosphonate transporter              | <b>-0.13</b> | 0.81667 |
| STM0429   | phnS    | 2-aminoethylphosphonate transporter              | <b>-0.19</b> | 0.66101 |
| STM0429   | phnS    | 2-aminoethylphosphonate transporter              | <b>0.06</b>  | 0.94470 |
| STM0430   | phnR    | 2-aminoethylphosphonate transport protein        | <b>0.15</b>  | 0.78755 |
| STM0430   | phnR    | 2-aminoethylphosphonate transport protein        | <b>0.50</b>  | 0.24049 |
| STM0431   | phnW    | 2-aminoethylphosphonate transport                | <b>0.15</b>  | 0.79752 |
| STM0431   | phnW    | 2-aminoethylphosphonate transport                | <b>-0.03</b> | 0.98658 |
| STM0432   | phnX    | 2-aminoethylphosphonate transport                | <b>-0.58</b> | 0.28696 |
| STM0432   | phnX    | 2-aminoethylphosphonate transport                | <b>0.12</b>  | 0.81667 |
| STM0433   | thiJ    | 4-methyl-5(beta-hydroxyethyl)-thiazole synthesis | <b>-0.06</b> | 0.91597 |
| STM0433   | thiJ    | 4-methyl-5(beta-hydroxyethyl)-thiazole synthesis | <b>0.60</b>  | 0.19142 |
| STM0434   | apbA    | 2-dehydropantoate 2-reductase                    | <b>0.18</b>  | 0.77346 |
| STM0434   | apbA    | 2-dehydropantoate 2-reductase                    | <b>-0.48</b> | 0.43817 |
| STM0435   | yajQ    | hypothetical protein STM0435                     | <b>-0.03</b> | 0.96785 |
| STM0435   | yajQ    | hypothetical protein STM0435                     | <b>0.12</b>  | 0.84021 |
| STM0436,S | yajR    | putative transport protein                       | <b>-0.25</b> | 0.55892 |
| STM0436,S | yajR    | putative transport protein                       | <b>0.58</b>  | 0.17359 |
| STM0437   | STM0437 | putative periplasmic protein                     | <b>-0.01</b> | 0.98226 |
| STM0437   | STM0437 | putative periplasmic protein                     | <b>0.02</b>  | 0.98193 |
| STM0438   | STM0438 | tetratricopeptide repeat protein                 | <b>0.06</b>  | 0.89130 |
| STM0438   | STM0438 | tetratricopeptide repeat protein                 | <b>-0.02</b> | 0.96785 |
| STM0439   | cyoE    | protoheme IX farnesyltransferase                 | <b>0.21</b>  | 0.58164 |
| STM0439   | cyoE    | protoheme IX farnesyltransferase                 | <b>0.08</b>  | 0.83949 |
| STM0440   | cyoD    | cytochrome o ubiquinol oxidase subunit IV        | <b>0.35</b>  | 0.38552 |
| STM0440   | cyoD    | cytochrome o ubiquinol oxidase subunit IV        | <b>0.12</b>  | 0.74997 |
| STM0441   | cyoC    | cytochrome o ubiquinol oxidase subunit III       | <b>0.86</b>  | 0.09135 |
| STM0441   | cyoC    | cytochrome o ubiquinol oxidase subunit III       | <b>0.70</b>  | 0.24313 |
| STM0442   | cyoB    | cytochrome o ubiquinol oxidase subunit I         | <b>-0.03</b> | 0.95532 |
| STM0442   | cyoB    | cytochrome o ubiquinol oxidase subunit I         | <b>0.10</b>  | 0.80335 |
| STM0443   | cyoA    | cytochrome o ubiquinol oxidase subunit II        | <b>-0.24</b> | 0.72027 |
| STM0443   | cyoA    | cytochrome o ubiquinol oxidase subunit II        | <b>0.43</b>  | 0.36233 |
| STM0444   | ampG    | muropeptide transporter                          | <b>-0.03</b> | 0.95608 |
| STM0444   | ampG    | muropeptide transporter                          | <b>0.35</b>  | 0.37310 |
| STM0445   | yajG    | putative lipoprotein                             | <b>0.11</b>  | 0.77474 |
| STM0445   | yajG    | putative lipoprotein                             | <b>0.15</b>  | 0.70229 |
| STM0446   | bolA    | putative regulatory protein                      | <b>0.04</b>  | 0.93830 |

|         |         |                                                        |              |         |
|---------|---------|--------------------------------------------------------|--------------|---------|
| STM0446 | bolA    | putative regulatory protein                            | <b>0.00</b>  | 0.99512 |
| STM0447 | tig     | trigger factor                                         | <b>-0.25</b> | 0.50811 |
| STM0447 | tig     | trigger factor                                         | <b>0.29</b>  | 0.48214 |
| STM0448 | clpP    | ATP-dependent Clp protease proteolytic subunit         | <b>-0.04</b> | 0.94045 |
| STM0448 | clpP    | ATP-dependent Clp protease proteolytic subunit         | <b>0.16</b>  | 0.69955 |
| STM0449 | clpX    | ATP-dependent protease ATP-binding subunit             | <b>-0.39</b> | 0.31280 |
| STM0449 | clpX    | ATP-dependent protease ATP-binding subunit             | <b>-0.10</b> | 0.83899 |
| STM0450 | lon     | ATP-dependent protease Lon                             | <b>-0.63</b> | 0.17330 |
| STM0450 | lon     | ATP-dependent protease Lon                             | <b>-0.64</b> | 0.17603 |
| STM0451 | hupB    | DNA-binding protein HU-beta                            | <b>-0.40</b> | 0.35770 |
| STM0451 | hupB    | DNA-binding protein HU-beta                            | <b>0.24</b>  | 0.60051 |
| STM0452 | cypD    | peptidyl-prolyl isomerase                              | <b>0.12</b>  | 0.93582 |
| STM0452 | cypD    | peptidyl-prolyl isomerase                              | <b>0.21</b>  | 0.83190 |
| STM0453 | ybaV    | putative DNA uptake protein                            | <b>-0.56</b> | 0.18265 |
| STM0453 | ybaV    | putative DNA uptake protein                            | <b>0.04</b>  | 0.94990 |
| STM0454 | ybaW    | putative esterase                                      | <b>-0.29</b> | 0.64335 |
| STM0454 | ybaW    | putative esterase                                      | <b>0.46</b>  | 0.47610 |
| STM0455 | ybaX    | putative aluminum resistance protein                   | <b>-0.29</b> | 0.40721 |
| STM0455 | ybaX    | putative aluminum resistance protein                   | <b>0.38</b>  | 0.46436 |
| STM0456 | ybaE    | putative ABC transporter periplasmic binding protein   | <b>-0.02</b> | 0.97267 |
| STM0456 | ybaE    | putative ABC transporter periplasmic binding protein   | <b>0.59</b>  | 0.19925 |
| STM0457 | cof     | putative hydrolase                                     | <b>-0.37</b> | 0.38884 |
| STM0457 | cof     | putative hydrolase                                     | <b>-0.38</b> | 0.58461 |
| STM0458 | STM0458 | putative cysteine synthase/cystathionine beta-synthase | <b>-0.04</b> | 0.94341 |
| STM0458 | STM0458 | putative cysteine synthase/cystathionine beta-synthase | <b>1.28</b>  | 0.11224 |
| STM0459 | ybaO    | putative transcriptional regulator                     | <b>-0.08</b> | 0.86102 |
| STM0459 | ybaO    | putative transcriptional regulator                     | <b>-0.06</b> | 0.92322 |
| STM0460 | mdlA    | ATP-binding component                                  | <b>0.01</b>  | 0.98539 |
| STM0460 | mdlA    | ATP-binding component                                  | <b>0.39</b>  | 0.46720 |
| STM0461 | mdlB    | putative transporter                                   | <b>-0.08</b> | 0.85743 |
| STM0461 | mdlB    | putative transporter                                   | <b>0.19</b>  | 0.75326 |
| STM0462 | glnK    | nitrogen regulatory protein P-II 2                     | <b>-0.09</b> | 0.85053 |
| STM0462 | glnK    | nitrogen regulatory protein P-II 2                     | <b>0.63</b>  | 0.24973 |
| STM0463 | amtB    | putative ammonium transport protein                    | <b>-0.28</b> | 0.67461 |
| STM0463 | amtB    | putative ammonium transport protein                    | <b>0.05</b>  | 0.94716 |
| STM0464 | tesB    | acyl-CoA thioesterase II                               | <b>-0.79</b> | 0.14285 |
| STM0464 | tesB    | acyl-CoA thioesterase II                               | <b>-0.35</b> | 0.38729 |
| STM0465 | ybaY    | hypothetical protein STM0465                           | <b>-0.08</b> | 0.91170 |
| STM0465 | ybaY    | hypothetical protein STM0465                           | <b>0.34</b>  | 0.40930 |
| STM0466 | ybaZ    | putative methyltransferase                             | <b>-0.27</b> | 0.80762 |
| STM0466 | ybaZ    | putative methyltransferase                             | <b>0.75</b>  | 0.21007 |
| STM0467 | ffs     | STM0467                                                | <b>-0.20</b> | 0.82145 |
| STM0467 | ffs     | STM0467                                                | <b>0.49</b>  | 0.35911 |
| STM0468 | ylaB    | hypothetical protein STM0468                           | <b>-0.32</b> | 0.70891 |
| STM0468 | ylaB    | hypothetical protein STM0468                           | <b>0.22</b>  | 0.54624 |
| STM0469 | rpmE2   | 50S ribosomal protein L31                              | <b>-0.11</b> | 0.79096 |
| STM0469 | rpmE2   | 50S ribosomal protein L31                              | <b>0.37</b>  | 0.36835 |
| STM0470 | rpmJ2   | 50S ribosomal protein L36                              | <b>-0.08</b> | 0.89566 |
| STM0470 | rpmJ2   | 50S ribosomal protein L36                              | <b>-0.02</b> | 0.96785 |
| STM0471 | ylaC    | putative inner membrane protein                        | <b>-0.16</b> | 0.79549 |
| STM0471 | ylaC    | putative inner membrane protein                        | <b>-0.09</b> | 0.86317 |
| STM0472 | maa     | maltose O-acetyltransferase                            | <b>-0.30</b> | 0.54595 |
| STM0472 | maa     | maltose O-acetyltransferase                            | <b>-0.15</b> | 0.71037 |
| STM0473 | hha     | hemolysin expression-modulating protein                | <b>0.27</b>  | 0.59675 |
| STM0473 | hha     | hemolysin expression-modulating protein                | <b>0.16</b>  | 0.64327 |
| STM0474 | ybaJ    | putative cytoplasmic protein                           | <b>-0.09</b> | 0.83655 |
| STM0474 | ybaJ    | putative cytoplasmic protein                           | <b>-0.01</b> | 0.98140 |
| STM0475 | acrB    | acridine efflux pump                                   | <b>0.18</b>  | 0.76720 |
| STM0475 | acrB    | acridine efflux pump                                   | <b>0.06</b>  | 0.93023 |
| STM0476 | acrA    | acridine efflux pump                                   | <b>-0.20</b> | 0.69398 |
| STM0476 | acrA    | acridine efflux pump                                   | <b>0.35</b>  | 0.45797 |
| STM0477 | acrR    | acrAB operon repressor                                 | <b>-0.10</b> | 0.78877 |
| STM0477 | acrR    | acrAB operon repressor                                 | <b>0.31</b>  | 0.46267 |

|           |         |                                                         |              |         |
|-----------|---------|---------------------------------------------------------|--------------|---------|
| STM0478   | aefA    | putative small-conductance mechanosensitive channel     | <b>-0.61</b> | 0.24313 |
| STM0478   | aefA    | putative small-conductance mechanosensitive channel     | <b>0.61</b>  | 0.22602 |
| STM0479   | STM0479 | putative transposase                                    | <b>-0.33</b> | 0.38991 |
| STM0479   | STM0479 | putative transposase                                    | <b>-0.21</b> | 0.65145 |
| STM0480   | ybaM    | putative inner membrane protein                         | <b>0.00</b>  | 0.99721 |
| STM0480   | ybaM    | putative inner membrane protein                         | <b>0.79</b>  | 0.11913 |
| STM0481   | priC    | primosomal replication protein N                        | <b>-0.51</b> | 0.23371 |
| STM0481   | priC    | primosomal replication protein N                        | <b>0.17</b>  | 0.64730 |
| STM0482   | ybaN    | hypothetical protein STM0482                            | <b>-0.15</b> | 0.71138 |
| STM0482   | ybaN    | hypothetical protein STM0482                            | <b>0.09</b>  | 0.84783 |
| STM0483   | apt     | adenine phosphoribosyltransferase                       | <b>-0.27</b> | 0.48668 |
| STM0483   | apt     | adenine phosphoribosyltransferase                       | <b>0.22</b>  | 0.64331 |
| STM0484   | dnaX    | DNA polymerase III subunits gamma and tau               | <b>-0.39</b> | 0.35937 |
| STM0484   | dnaX    | DNA polymerase III subunits gamma and tau               | <b>-0.10</b> | 0.81667 |
| STM0485   | ybaB    | hypothetical protein STM0485                            | <b>-0.37</b> | 0.41996 |
| STM0485   | ybaB    | hypothetical protein STM0485                            | <b>0.27</b>  | 0.49708 |
| STM0486   | recR    | recombination protein RecR                              | <b>-0.70</b> | 0.20065 |
| STM0486   | recR    | recombination protein RecR                              | <b>-0.44</b> | 0.29453 |
| STM0487,S | htpG    | heat shock protein 90                                   | <b>-0.59</b> | 0.15529 |
| STM0487,S | htpG    | heat shock protein 90                                   | <b>-0.50</b> | 0.19909 |
| STM0488   | adk     | adenylate kinase                                        | <b>-0.04</b> | 0.91900 |
| STM0488   | adk     | adenylate kinase                                        | <b>-0.06</b> | 0.90736 |
| STM0489   | hemH    | ferrochelatase                                          | <b>0.02</b>  | 0.96896 |
| STM0489   | hemH    | ferrochelatase                                          | <b>0.08</b>  | 0.88977 |
| STM0490   | aes     | acetyl esterase                                         | <b>0.04</b>  | 0.94050 |
| STM0490   | aes     | acetyl esterase                                         | <b>0.14</b>  | 0.70726 |
| STM0491   | gsk     | inosine-guanosine kinase                                | <b>-0.18</b> | 0.67842 |
| STM0491   | gsk     | inosine-guanosine kinase                                | <b>0.02</b>  | 0.97168 |
| STM0492   | ybaL    | putative transport protein                              | <b>-0.60</b> | 0.26833 |
| STM0492   | ybaL    | putative transport protein                              | <b>0.23</b>  | 0.56294 |
| STM0493   | fsr     | putative transport protein                              | <b>0.12</b>  | 0.76526 |
| STM0493   | fsr     | putative transport protein                              | <b>0.13</b>  | 0.81312 |
| STM0494   | ushA    | UDP-sugar hydrolase/5'-nucleotidase                     | <b>0.11</b>  | 0.79893 |
| STM0494   | ushA    | UDP-sugar hydrolase/5'-nucleotidase                     | <b>0.04</b>  | 0.93023 |
| STM0495   | ybaK    | putative cytoplasmic protein                            | <b>-0.17</b> | 0.73157 |
| STM0495   | ybaK    | putative cytoplasmic protein                            | <b>-0.19</b> | 0.61634 |
| STM0496   | ybaP    | putative cytoplasmic protein                            | <b>-0.52</b> | 0.21812 |
| STM0496   | ybaP    | putative cytoplasmic protein                            | <b>0.20</b>  | 0.70809 |
| STM0497   | STM0497 | putative periplasmic protein                            | <b>-0.70</b> | 0.13905 |
| STM0497   | STM0497 | putative periplasmic protein                            | <b>0.32</b>  | 0.58108 |
| STM0498   | copA    | putative copper-transporting ATPase                     | <b>0.00</b>  | 0.99938 |
| STM0498   | copA    | putative copper-transporting ATPase                     | <b>0.13</b>  | 0.76538 |
| STM0499   | cueR    | putative heavy metal transcriptional repressor          | <b>-0.22</b> | 0.62970 |
| STM0499   | cueR    | putative heavy metal transcriptional repressor          | <b>0.92</b>  | 0.08322 |
| STM0500   | ybbJ    | hypothetical protein STM0500                            | <b>-0.15</b> | 0.73469 |
| STM0500   | ybbJ    | hypothetical protein STM0500                            | <b>-0.20</b> | 0.64590 |
| STM0501   | ybbK    | putative inner membrane protein                         | <b>-0.10</b> | 0.85174 |
| STM0501   | ybbK    | putative inner membrane protein                         | <b>0.50</b>  | 0.33452 |
| STM0502   | ybbL    | system                                                  | <b>-0.23</b> | 0.58164 |
|           |         | putative ABC-type sugar/spermidine/putrescine transport |              |         |
| STM0502   | ybbL    | system                                                  | <b>0.05</b>  | 0.91484 |
| STM0503   | ybbM    | putative transport protein                              | <b>-0.49</b> | 0.21393 |
| STM0503   | ybbM    | putative transport protein                              | <b>-0.64</b> | 0.14030 |
| STM0504   | ybbN    | putative thioredoxin protein                            | <b>-0.32</b> | 0.55112 |
| STM0504   | ybbN    | putative thioredoxin protein                            | <b>-0.58</b> | 0.19967 |
| STM0505   | ybbO    | short chain dehydrogenase                               | <b>-0.59</b> | 0.20129 |
| STM0505   | ybbO    | short chain dehydrogenase                               | <b>-0.12</b> | 0.75683 |
| STM0506   | tesA    | multifunctional acyl-CoA thioesterase I                 | <b>-0.12</b> | 0.75395 |
| STM0506   | tesA    | multifunctional acyl-CoA thioesterase I                 | <b>0.32</b>  | 0.42511 |
| STM0507   | ybbA    | putative transporter                                    | <b>-0.09</b> | 0.86017 |
| STM0507   | ybbA    | putative transporter                                    | <b>0.46</b>  | 0.54160 |
| STM0508   | ybbP    | putative inner membrane protein                         | <b>-0.40</b> | 0.35937 |

|         |         |                                                            |              |         |
|---------|---------|------------------------------------------------------------|--------------|---------|
| STM0508 | ybbP    | putative inner membrane protein                            | <b>0.45</b>  | 0.36311 |
| STM0509 | STM0509 | putative outer membrane protein                            | <b>-0.37</b> | 0.36253 |
| STM0509 | STM0509 | putative outer membrane protein                            | <b>-0.12</b> | 0.79954 |
| STM0510 | sfbA    | putative ABC-type transport system ATPase component        | <b>-0.32</b> | 0.42737 |
| STM0510 | sfbA    | putative ABC-type transport system ATPase component        | <b>0.60</b>  | 0.19870 |
| STM0511 | sfbB    | putative ABC-type transport system ATPase component        | <b>0.13</b>  | 0.73895 |
| STM0511 | sfbB    | putative ABC-type transport system ATPase component        | <b>0.58</b>  | 0.37919 |
| STM0512 | sfbC    | putative ABC transporter permease component                | <b>-0.55</b> | 0.54134 |
| STM0512 | sfbC    | putative ABC transporter permease component                | <b>-0.12</b> | 0.80096 |
| STM0513 | ybbB    | putative ATPase                                            | <b>-0.07</b> | 0.89445 |
| STM0513 | ybbB    | putative ATPase                                            | <b>0.08</b>  | 0.87649 |
| STM0514 | ybbS    | putative transcriptional regulator                         | <b>-0.34</b> | 0.46992 |
| STM0514 | ybbS    | putative transcriptional regulator                         | <b>-0.01</b> | 0.99447 |
| STM0515 | allA    | ureidoglycolate hydrolase                                  | <b>0.13</b>  | 0.85437 |
| STM0515 | allA    | ureidoglycolate hydrolase                                  | <b>0.29</b>  | 0.54094 |
| STM0516 | allR    | putative regulatory protein                                | <b>-0.63</b> | 0.16783 |
| STM0516 | allR    | putative regulatory protein                                | <b>0.23</b>  | 0.60427 |
| STM0517 | gcl     | glyoxylate carboligase                                     | <b>-0.43</b> | 0.35937 |
| STM0517 | gcl     | glyoxylate carboligase                                     | <b>-0.03</b> | 0.95574 |
| STM0518 | gip     | glyoxylate-induced protein                                 | <b>0.27</b>  | 0.74099 |
| STM0518 | gip     | glyoxylate-induced protein                                 | <b>0.28</b>  | 0.49226 |
| STM0519 | glxR    | tartronic semialdehyde reductase                           | <b>-0.34</b> | 0.49487 |
| STM0519 | glxR    | tartronic semialdehyde reductase                           | <b>0.97</b>  | 0.19843 |
| STM0520 | STM0520 | putative permease                                          | <b>-0.11</b> | 0.91175 |
| STM0520 | STM0520 | putative permease                                          | <b>0.21</b>  | 0.65795 |
| STM0522 | allP    | putative allantoin transport protein                       | <b>-0.38</b> | 0.43209 |
| STM0522 | allP    | putative allantoin transport protein                       | <b>-0.11</b> | 0.83899 |
| STM0523 | allB    | allantoinase                                               | <b>0.08</b>  | 0.91455 |
| STM0523 | allB    | allantoinase                                               | <b>0.93</b>  | 0.22540 |
| STM0524 | ybbY    | putative transport protein                                 | <b>-0.13</b> | 0.86528 |
| STM0524 | ybbY    | putative transport protein                                 | <b>0.15</b>  | 0.80574 |
| STM0525 | glxK    | glycerate kinase II                                        | <b>-0.22</b> | 0.72999 |
| STM0525 | glxK    | glycerate kinase II                                        | <b>-0.06</b> | 0.93367 |
| STM0526 | ylbA    | putative glyoxylate utilization protein                    | <b>0.25</b>  | 0.61064 |
| STM0526 | ylbA    | putative glyoxylate utilization protein                    | <b>0.33</b>  | 0.65451 |
| STM0527 | allC    | N-carbamoyl-L-amino acid amidohydrolase                    | <b>-0.38</b> | 0.42811 |
| STM0527 | allC    | N-carbamoyl-L-amino acid amidohydrolase                    | <b>0.12</b>  | 0.88018 |
| STM0528 | allD    | ureidoglycolate dehydrogenase                              | <b>-0.63</b> | 0.42811 |
| STM0528 | allD    | ureidoglycolate dehydrogenase                              | <b>0.07</b>  | 0.95497 |
| STM0529 | fdrA    | succinyl-CoA synthetase alpha subunit                      | <b>-0.70</b> | 0.22540 |
| STM0529 | fdrA    | succinyl-CoA synthetase alpha subunit                      | <b>-0.03</b> | 0.96568 |
| STM0530 | ylbE    | putative cytoplasmic protein                               | <b>-0.33</b> | 0.78016 |
| STM0530 | ylbE    | putative cytoplasmic protein                               | <b>0.23</b>  | 0.73151 |
| STM0531 | ylbF    | putative cytoplasmic protein                               | <b>0.11</b>  | 0.79137 |
| STM0531 | ylbF    | putative cytoplasmic protein                               | <b>0.48</b>  | 0.32016 |
| STM0532 | arcC    | carbamate kinase                                           | <b>0.00</b>  | 0.99857 |
| STM0532 | arcC    | carbamate kinase                                           | <b>0.23</b>  | 0.69668 |
| STM0533 | purK    | phosphoribosylaminoimidazole carboxylase                   | <b>-0.53</b> | 0.23635 |
| STM0533 | purK    | phosphoribosylaminoimidazole carboxylase                   | <b>0.60</b>  | 0.24520 |
| STM0534 | purE    | phosphoribosylaminoimidazole carboxylase catalytic subunit | <b>-0.42</b> | 0.26833 |
| STM0534 | purE    | phosphoribosylaminoimidazole carboxylase catalytic subunit | <b>-0.01</b> | 0.99372 |
| STM0535 | lpxH    | UDP-2,3-diacylglycerolamine hydrolase                      | <b>-0.29</b> | 0.52208 |
| STM0535 | lpxH    | UDP-2,3-diacylglycerolamine hydrolase                      | <b>-0.09</b> | 0.85548 |
| STM0536 | ppiB    | peptidyl-prolyl cis-trans isomerase B                      | <b>-0.37</b> | 0.42511 |
| STM0536 | ppiB    | peptidyl-prolyl cis-trans isomerase B                      | <b>-0.19</b> | 0.65925 |
| STM0537 | cysS    | cysteinyI-tRNA synthetase                                  | <b>-0.15</b> | 0.70430 |
| STM0537 | cysS    | cysteinyI-tRNA synthetase                                  | <b>0.14</b>  | 0.74260 |
| STM0538 | STM0538 | putative outer membrane protein                            | <b>0.19</b>  | 0.74562 |
| STM0538 | STM0538 | putative outer membrane protein                            | <b>0.58</b>  | 0.38596 |
| STM0539 | STM0539 | putative inner membrane protein                            | <b>-0.02</b> | 0.97625 |
| STM0539 | STM0539 | putative inner membrane protein                            | <b>0.18</b>  | 0.73811 |

|             |         |                                                   |              |         |
|-------------|---------|---------------------------------------------------|--------------|---------|
| STM0540     | ybcI    | putative membrane-bound metal-dependent hydrolase | <b>-0.14</b> | 0.74779 |
| STM0540     | ybcI    | putative membrane-bound metal-dependent hydrolase | <b>-0.09</b> | 0.88902 |
| STM0541     | ybcJ    | putative cytoplasmic protein                      | <b>-0.79</b> | 0.11224 |
| STM0541     | ybcJ    | putative cytoplasmic protein                      | <b>-0.25</b> | 0.53399 |
| STM0542     | folD    | 5,10-methylene-tetrahydrofolate                   | <b>-0.06</b> | 0.91378 |
| STM0542     | folD    | 5,10-methylene-tetrahydrofolate                   | <b>-0.06</b> | 0.91937 |
| STM0543     | fimA    | fimbrin                                           | <b>-0.63</b> | 0.20505 |
| STM0543     | fimA    | fimbrin                                           | <b>0.02</b>  | 0.98539 |
| STM0544     | fimI    | fimbrial protein                                  | <b>-0.09</b> | 0.83982 |
| STM0544     | fimI    | fimbrial protein                                  | <b>0.35</b>  | 0.49362 |
| STM0545     | fimC    | periplasmic chaperone                             | <b>-0.25</b> | 0.74807 |
| STM0545     | fimC    | periplasmic chaperone                             | <b>0.25</b>  | 0.72518 |
| STM0546     | fimD    | outer membrane usher protein precursor            | <b>-0.17</b> | 0.70048 |
| STM0546     | fimD    | outer membrane usher protein precursor            | <b>0.50</b>  | 0.32481 |
| STM0547     | fimH    | minor fimbrial subunit                            | <b>-0.51</b> | 0.23892 |
| STM0547     | fimH    | minor fimbrial subunit                            | <b>0.00</b>  | 0.99697 |
| STM0548     | fimF    | putative fimbrial protein                         | <b>-0.25</b> | 0.49871 |
| STM0548     | fimF    | putative fimbrial protein                         | <b>0.76</b>  | 0.29285 |
| STM0549     | fimZ    | fimbrial protein Z                                | <b>-0.43</b> | 0.38641 |
| STM0549     | fimZ    | fimbrial protein Z                                | <b>0.17</b>  | 0.79102 |
| STM0550     | fimY    | putative regulatory protein                       | <b>-0.47</b> | 0.28861 |
| STM0550     | fimY    | putative regulatory protein                       | <b>-0.04</b> | 0.97583 |
| STM0551     | STM0551 | hypothetical protein STM0551                      | <b>-0.25</b> | 0.76538 |
| STM0551     | STM0551 | hypothetical protein STM0551                      | <b>0.29</b>  | 0.68136 |
| STM0552     | fimW    | putative fimbrial protein                         | <b>-0.28</b> | 0.71169 |
| STM0552     | fimW    | putative fimbrial protein                         | <b>0.21</b>  | 0.72210 |
| STM0553     | argU    | STM0553                                           | <b>-0.31</b> | 0.67085 |
| STM0553     | argU    | STM0553                                           | <b>0.34</b>  | 0.73568 |
| STM05559.T1 | -       | STM05559.T1                                       | <b>-0.11</b> | 0.85718 |
| STM05559.T1 | -       | STM05559.T1                                       | <b>0.48</b>  | 0.38552 |
| STM0557     | STM0557 | putative inner membrane protein                   | <b>-0.31</b> | 0.51526 |
| STM0557     | STM0557 | putative inner membrane protein                   | <b>0.36</b>  | 0.57278 |
| STM0558     | yfdH    | putative glycosyltransferase                      | <b>-0.24</b> | 0.72247 |
| STM0558     | yfdH    | putative glycosyltransferase                      | <b>-0.33</b> | 0.48994 |
| STM0559     | rfbI    | putative glycosyl translocase                     | <b>0.02</b>  | 0.97513 |
| STM0559     | rfbI    | putative glycosyl translocase                     | <b>0.03</b>  | 0.97431 |
| STM0561     | STM0561 | sensor kinase                                     | <b>-0.20</b> | 0.67509 |
| STM0561     | STM0561 | sensor kinase                                     | <b>0.52</b>  | 0.35014 |
| STM0563     | STM0563 | putative transcriptional regulator                | <b>-0.40</b> | 0.35538 |
| STM0563     | STM0563 | putative transcriptional regulator                | <b>0.18</b>  | 0.70474 |
| STM0564     | STM0564 | pyridine nucleotide-disulfide oxidoreductase      | <b>-0.43</b> | 0.37718 |
| STM0564     | STM0564 | pyridine nucleotide-disulfide oxidoreductase      | <b>0.07</b>  | 0.92683 |
| STM0565     | STM0565 | putative periplasmic protein                      | <b>-0.41</b> | 0.57070 |
| STM0565     | STM0565 | putative periplasmic protein                      | <b>0.05</b>  | 0.95498 |
| STM0566     | STM0566 | putative inner membrane protein                   | <b>-0.24</b> | 0.56162 |
| STM0566     | STM0566 | putative inner membrane protein                   | <b>-0.12</b> | 0.83034 |
| STM0567     | STM0567 | putative DNA repair ATPase                        | <b>0.13</b>  | 0.76610 |
| STM0567     | STM0567 | putative DNA repair ATPase                        | <b>-0.02</b> | 0.98212 |
| STM0568     | pheP    | phenylalanine transporter                         | <b>-0.05</b> | 0.94179 |
| STM0568     | pheP    | phenylalanine transporter                         | <b>-0.08</b> | 0.83723 |
| STM0569     | ybdG    | hypothetical protein STM0569                      | <b>-0.43</b> | 0.41154 |
| STM0569     | ybdG    | hypothetical protein STM0569                      | <b>-0.37</b> | 0.38919 |
| STM0570     | apeE    | outer membrane esterase                           | <b>-0.28</b> | 0.40947 |
| STM0570     | apeE    | outer membrane esterase                           | <b>0.29</b>  | 0.45800 |
| STM0571     | STM0571 | putative inner membrane protein                   | <b>-0.17</b> | 0.78332 |
| STM0571     | STM0571 | putative inner membrane protein                   | <b>0.46</b>  | 0.38668 |
| STM0572     | STM0572 | putative phosphosugar isomerase                   | <b>0.00</b>  | 0.99928 |
| STM0572     | STM0572 | putative phosphosugar isomerase                   | <b>0.35</b>  | 0.48600 |
| STM0573     | STM0573 | putative inner membrane protein                   | <b>-0.18</b> | 0.89617 |
| STM0573     | STM0573 | putative inner membrane protein                   | <b>0.88</b>  | 0.13027 |
| STM0574     | STM0574 | putative PTS system mannose-specific enzyme IID   | <b>-0.47</b> | 0.36270 |
| STM0574     | STM0574 | putative PTS system mannose-specific enzyme IID   | <b>0.33</b>  | 0.38668 |
| STM0575     | STM0575 | putative inner membrane protein                   | <b>0.13</b>  | 0.87244 |

|         |         |                                                       |              |         |
|---------|---------|-------------------------------------------------------|--------------|---------|
| STM0575 | STM0575 | putative inner membrane protein                       | <b>0.24</b>  | 0.53533 |
| STM0576 | STM0576 | putative PTS system mannose-specific enzyme IIAB      | <b>-0.08</b> | 0.85312 |
| STM0576 | STM0576 | putative PTS system mannose-specific enzyme IIAB      | <b>0.68</b>  | 0.45550 |
| STM0577 | STM0577 | putative PTS system mannose-specific enzyme IIAB      | <b>-0.84</b> | 0.11913 |
| STM0577 | STM0577 | putative PTS system mannose-specific enzyme IIAB      | <b>0.28</b>  | 0.76211 |
| STM0578 | nfnB    | dihydropteridine reductase/oxygen-insensitive NAD(P)H | <b>-0.27</b> | 0.54624 |
| STM0578 | nfnB    | dihydropteridine reductase/oxygen-insensitive NAD(P)H | <b>0.33</b>  | 0.61201 |
| STM0579 | ybdF    | putative cytoplasmic protein                          | <b>-0.03</b> | 0.96775 |
| STM0579 | ybdF    | putative cytoplasmic protein                          | <b>0.45</b>  | 0.39520 |
| STM0580 | STM0580 | putative regulatory protein                           | <b>-0.13</b> | 0.80915 |
| STM0580 | STM0580 | putative regulatory protein                           | <b>0.21</b>  | 0.60240 |
| STM0581 | STM0581 | putative regulatory protein                           | <b>-0.13</b> | 0.78755 |
| STM0581 | STM0581 | putative regulatory protein                           | <b>1.03</b>  | 0.12860 |
| STM0582 | ybdJ    | putative inner membrane protein                       | <b>0.02</b>  | 0.98539 |
| STM0582 | ybdJ    | putative inner membrane protein                       | <b>0.28</b>  | 0.51052 |
| STM0583 | ybdK    | putative cytoplasmic protein                          | <b>0.04</b>  | 0.95532 |
| STM0583 | ybdK    | putative cytoplasmic protein                          | <b>0.50</b>  | 0.52364 |
| STM0584 | entD    | enterochelin synthetase component D                   | <b>-0.06</b> | 0.91171 |
| STM0584 | entD    | enterochelin synthetase component D                   | <b>0.17</b>  | 0.81342 |
| STM0585 | fepA    | outer membrane ferric enterobactin receptor precursor | <b>0.49</b>  | 0.35419 |
| STM0585 | fepA    | outer membrane ferric enterobactin receptor precursor | <b>1.11</b>  | 0.15078 |
| STM0586 | fes     | enterochelin esterase                                 | <b>0.57</b>  | 0.25382 |
| STM0586 | fes     | enterochelin esterase                                 | <b>0.75</b>  | 0.17074 |
| STM0587 | ybdZ    | putative cytoplasmic protein                          | <b>0.20</b>  | 0.65040 |
| STM0587 | ybdZ    | putative cytoplasmic protein                          | <b>0.82</b>  | 0.13128 |
| STM0588 | entF    | enterobactin synthetase component F                   | <b>0.33</b>  | 0.34473 |
| STM0588 | entF    | enterobactin synthetase component F                   | <b>0.55</b>  | 0.19425 |
| STM0589 | fepE    | ferric enterobactin/enterochelin transporter          | <b>0.18</b>  | 0.72213 |
| STM0589 | fepE    | ferric enterobactin/enterochelin transporter          | <b>0.54</b>  | 0.36311 |
| STM0590 | fepC    | enterobactin transporter                              | <b>-0.17</b> | 0.72781 |
| STM0590 | fepC    | enterobactin transporter                              | <b>0.51</b>  | 0.21747 |
| STM0591 | fepG    | ferric enterobactin transporter                       | <b>0.22</b>  | 0.62906 |
| STM0591 | fepG    | ferric enterobactin transporter                       | <b>0.43</b>  | 0.37692 |
| STM0592 | fepD    | ferric enterobactin/enterochelin transporter          | <b>0.31</b>  | 0.69882 |
| STM0592 | fepD    | ferric enterobactin/enterochelin transporter          | <b>0.48</b>  | 0.32481 |
| STM0593 | ybdA    | putative transport protein                            | <b>-0.08</b> | 0.92513 |
| STM0593 | ybdA    | putative transport protein                            | <b>0.51</b>  | 0.46720 |
| STM0594 | fepB    | ferric enterobactin transporter                       | <b>0.16</b>  | 0.70157 |
| STM0594 | fepB    | ferric enterobactin transporter                       | <b>0.21</b>  | 0.66474 |
| STM0595 | entC    | isochorismate synthase                                | <b>0.63</b>  | 0.26621 |
| STM0595 | entC    | isochorismate synthase                                | <b>0.84</b>  | 0.10586 |
| STM0596 | entE    | 2,3-dihydroxybenzoate-AMP ligase                      | <b>0.53</b>  | 0.20129 |
| STM0596 | entE    | 2,3-dihydroxybenzoate-AMP ligase                      | <b>0.80</b>  | 0.17139 |
| STM0597 | entB    | 2,3-dihydro-2,3-dihydroxybenzoate synthetase          | <b>0.37</b>  | 0.34824 |
| STM0597 | entB    | 2,3-dihydro-2,3-dihydroxybenzoate synthetase          | <b>0.85</b>  | 0.13831 |
| STM0598 | entA    | 2,3-dihydroxybenzoate-2,3-dehydrogenase               | <b>0.66</b>  | 0.20160 |
| STM0598 | entA    | 2,3-dihydroxybenzoate-2,3-dehydrogenase               | <b>0.65</b>  | 0.20432 |
| STM0599 | ybdB    | hypothetical protein STM0599                          | <b>0.13</b>  | 0.83268 |
| STM0599 | ybdB    | hypothetical protein STM0599                          | <b>0.83</b>  | 0.11913 |
| STM0600 | cstA    | carbon starvation protein                             | <b>-0.39</b> | 0.42909 |
| STM0600 | cstA    | carbon starvation protein                             | <b>0.49</b>  | 0.35564 |
| STM0601 | ybdD    | putative cytoplasmic protein                          | <b>0.17</b>  | 0.81667 |
| STM0601 | ybdD    | putative cytoplasmic protein                          | <b>0.18</b>  | 0.69988 |
| STM0602 | ybdH    | putative glycerol dehydrogenase                       | <b>0.14</b>  | 0.75424 |
| STM0602 | ybdH    | putative glycerol dehydrogenase                       | <b>0.38</b>  | 0.36341 |
| STM0603 | ybdL    | putative aminotransferase                             | <b>-0.32</b> | 0.49362 |
| STM0603 | ybdL    | putative aminotransferase                             | <b>0.11</b>  | 0.82624 |
| STM0604 | ybdM    | putative transcriptional regulator                    | <b>-0.64</b> | 0.17041 |
| STM0604 | ybdM    | putative transcriptional regulator                    | <b>-0.12</b> | 0.84998 |
|         |         | putative 3'-phosphoadenosine 5'-phosphosulfate        |              |         |
| STM0605 | ybdN    | sulfotransferase                                      | <b>-0.54</b> | 0.34793 |
|         |         | putative 3'-phosphoadenosine 5'-phosphosulfate        |              |         |
| STM0605 | ybdN    | sulfotransferase                                      | <b>0.10</b>  | 0.92161 |

|           |         |                                                              |              |         |
|-----------|---------|--------------------------------------------------------------|--------------|---------|
| STM0606   | ybdO    | putative transcriptional regulator                           | <b>-0.22</b> | 0.61654 |
| STM0606   | ybdO    | putative transcriptional regulator                           | <b>0.59</b>  | 0.29044 |
| STM0607   | dsbG    | periplasmic disulfide isomerase/thiol-disulphide oxidase     | <b>-0.89</b> | 0.18961 |
| STM0607   | dsbG    | periplasmic disulfide isomerase/thiol-disulphide oxidase     | <b>0.07</b>  | 0.91684 |
| STM0608   | ahpC    | alkyl hydroperoxide reductase C22 subunit                    | <b>-0.36</b> | 0.33587 |
| STM0608   | ahpC    | alkyl hydroperoxide reductase C22 subunit                    | <b>0.23</b>  | 0.53513 |
| STM0609   | ahpF    | alkyl hydroperoxide reductase F52a subunit                   | <b>-0.18</b> | 0.72341 |
| STM0609   | ahpF    | alkyl hydroperoxide reductase F52a subunit                   | <b>0.07</b>  | 0.90181 |
| STM0610   | STM0610 | putative anaerobic dehydrogenase component                   | <b>0.37</b>  | 0.61960 |
| STM0610   | STM0610 | putative anaerobic dehydrogenase component                   | <b>0.91</b>  | 0.45107 |
| STM0611   | STM0611 | putative oxidoreductase protein                              | <b>0.50</b>  | 0.43434 |
| STM0611   | STM0611 | putative oxidoreductase protein                              | <b>0.73</b>  | 0.24444 |
| STM0612   | STM0612 | putative hydrogenase protein                                 | <b>0.29</b>  | 0.50811 |
| STM0612   | STM0612 | putative hydrogenase protein                                 | <b>0.18</b>  | 0.73713 |
| STM0613   | STM0613 | putative hydrogenase protein                                 | <b>-0.26</b> | 0.58965 |
| STM0613   | STM0613 | putative hydrogenase protein                                 | <b>-0.22</b> | 0.72976 |
| STM0614   | ybdQ    | putative universal stress protein                            | <b>-0.29</b> | 0.49878 |
| STM0614   | ybdQ    | putative universal stress protein                            | <b>0.43</b>  | 0.46862 |
| STM0615   | ybdR    | putative dehydrogenase                                       | <b>0.03</b>  | 0.96228 |
| STM0615   | ybdR    | putative dehydrogenase                                       | <b>0.32</b>  | 0.52810 |
| STM0616   | rnk     | nucleoside diphosphate kinase regulator                      | <b>-0.26</b> | 0.48987 |
| STM0616   | rnk     | nucleoside diphosphate kinase regulator                      | <b>0.31</b>  | 0.40020 |
| STM0617   | rna     | RNase I                                                      | <b>-0.09</b> | 0.86190 |
| STM0617   | rna     | RNase I                                                      | <b>0.16</b>  | 0.73568 |
| STM0618   | citT    | citrate/succinate transport antiport protein                 | <b>-0.57</b> | 0.22938 |
| STM0618   | citT    | citrate/succinate transport antiport protein                 | <b>-0.03</b> | 0.96107 |
| STM0619   | citG    | triphosphoribosyl-dephospho-CoA synthase                     | <b>0.10</b>  | 0.85504 |
| STM0619   | citG    | triphosphoribosyl-dephospho-CoA synthase                     | <b>0.19</b>  | 0.72219 |
| STM0620   | citX    | 2'-(5'-triphosphoribosyl)-3'-dephospho-CoA:apo-citrate lyase | <b>-0.11</b> | 0.83100 |
| STM0620   | citX    | 2'-(5'-triphosphoribosyl)-3'-dephospho-CoA:apo-citrate lyase | <b>0.24</b>  | 0.75395 |
| STM0621   | citF    | citrate lyase alpha chain/citrate-ACP transferase            | <b>-0.02</b> | 0.97168 |
| STM0621   | citF    | citrate lyase alpha chain/citrate-ACP transferase            | <b>0.58</b>  | 0.53515 |
| STM0622   | citE    | citrate lyase beta chain                                     | <b>-0.40</b> | 0.49035 |
| STM0622   | citE    | citrate lyase beta chain                                     | <b>0.40</b>  | 0.40701 |
| STM0623   | citD    | citrate lyase acyl carrier protein gamma chain               | <b>0.46</b>  | 0.43914 |
| STM0623   | citD    | citrate lyase acyl carrier protein gamma chain               | <b>1.15</b>  | 0.07542 |
| STM0624   | citC    | citrate lyase synthetase                                     | <b>-0.98</b> | 0.13645 |
| STM0624   | citC    | citrate lyase synthetase                                     | <b>-0.02</b> | 0.96968 |
| STM0625   | dpiB    | sensory histidine kinase                                     | <b>-0.44</b> | 0.25759 |
| STM0625   | dpiB    | sensory histidine kinase                                     | <b>0.43</b>  | 0.33833 |
| STM0626   | dpiA    | response regulator                                           | <b>-0.11</b> | 0.84657 |
| STM0626   | dpiA    | response regulator                                           | <b>0.56</b>  | 0.39861 |
| STM0627   | dcuC    | dicarboxylate transporter                                    | <b>-0.32</b> | 0.61811 |
| STM0627   | dcuC    | dicarboxylate transporter                                    | <b>0.47</b>  | 0.45450 |
| STM0628   | pagP    | PhoPQ-activated gene                                         | <b>-0.87</b> | 0.13027 |
| STM0628   | pagP    | PhoPQ-activated gene                                         | <b>-0.84</b> | 0.21015 |
| STM0629   | cspE    | cold shock protein E                                         | <b>-0.24</b> | 0.80406 |
| STM0629   | cspE    | cold shock protein E                                         | <b>0.07</b>  | 0.94050 |
| STM0630   | ccrB    | camphor resistance protein CrcB                              | <b>0.17</b>  | 0.77801 |
| STM0630   | ccrB    | camphor resistance protein CrcB                              | <b>0.05</b>  | 0.94867 |
| STM0631   | ybeM    | putative hydrolase                                           | <b>-0.37</b> | 0.29912 |
| STM0631   | ybeM    | putative hydrolase                                           | <b>0.38</b>  | 0.40020 |
| STM0632   | tatE    | twin argininte translocase protein A                         | <b>-0.31</b> | 0.53200 |
| STM0632   | tatE    | twin argininte translocase protein A                         | <b>-0.51</b> | 0.36444 |
| STM0633   | lipA    | lipoyl synthase                                              | <b>-0.32</b> | 0.42111 |
| STM0633   | lipA    | lipoyl synthase                                              | <b>0.05</b>  | 0.91170 |
| STM0634   | ybeF    | putative transcriptional regulator                           | <b>-0.09</b> | 0.89796 |
| STM0634   | ybeF    | putative transcriptional regulator                           | <b>0.64</b>  | 0.25473 |
| STM0635,S | lipB    | lipoyltransferase                                            | <b>-0.12</b> | 0.78929 |
| STM0635,S | lipB    | lipoyltransferase                                            | <b>0.02</b>  | 0.97474 |
| STM0636   | ybeD    | hypothetical protein STM0636                                 | <b>-0.44</b> | 0.31293 |

|           |           |                                                       |              |         |
|-----------|-----------|-------------------------------------------------------|--------------|---------|
| STM0636   | ybeD      | hypothetical protein STM0636                          | <b>-0.14</b> | 0.70077 |
| STM0637   | dacA      | D-alanyl-D-alanine carboxypeptidase                   | <b>-0.43</b> | 0.35937 |
| STM0637   | dacA      | D-alanyl-D-alanine carboxypeptidase                   | <b>-0.25</b> | 0.65974 |
| STM0638   | rlpA      | minor lipoprotein                                     | <b>-0.36</b> | 0.40818 |
| STM0638   | rlpA      | minor lipoprotein                                     | <b>0.22</b>  | 0.71603 |
| STM0639   | mr dB     | rod shape-determining membrane protein                | <b>-0.18</b> | 0.66743 |
| STM0639   | mr dB     | rod shape-determining membrane protein                | <b>0.15</b>  | 0.73473 |
| STM0640   | mr dA     | cell elongation-specific transpeptidase               | <b>-0.39</b> | 0.41329 |
| STM0640   | mr dA     | cell elongation-specific transpeptidase               | <b>0.05</b>  | 0.93709 |
| STM0641   | ybeA      | hypothetical protein STM0641                          | <b>-0.21</b> | 0.56370 |
| STM0641   | ybeA      | hypothetical protein STM0641                          | <b>0.29</b>  | 0.49336 |
| STM0642   | ybeB      | hypothetical protein STM0642                          | <b>0.04</b>  | 0.94050 |
| STM0642   | ybeB      | hypothetical protein STM0642                          | <b>0.18</b>  | 0.65810 |
| STM0643   | cobC      | alpha ribazole-5'-P phosphatase                       | <b>0.17</b>  | 0.66406 |
| STM0643   | cobC      | alpha ribazole-5'-P phosphatase                       | <b>0.13</b>  | 0.75831 |
| STM0644   | cobD      | threonine-phosphate decarboxylase                     | <b>0.22</b>  | 0.61343 |
| STM0644   | cobD      | threonine-phosphate decarboxylase                     | <b>0.20</b>  | 0.57310 |
| STM0645   | nadD      | nicotinic acid mononucleotide adenylyltransferase     | <b>-0.01</b> | 0.98790 |
| STM0645   | nadD      | nicotinic acid mononucleotide adenylyltransferase     | <b>0.07</b>  | 0.92506 |
| STM0646   | hoIA      | DNA polymerase III subunit delta                      | <b>0.16</b>  | 0.70140 |
| STM0646   | hoIA      | DNA polymerase III subunit delta                      | <b>0.35</b>  | 0.39987 |
| STM0647   | rlpB      | minor lipoprotein                                     | <b>-0.17</b> | 0.70545 |
| STM0647   | rlpB      | minor lipoprotein                                     | <b>-0.16</b> | 0.67262 |
| STM0648   | leuS      | leucyl-tRNA synthetase                                | <b>0.12</b>  | 0.73904 |
| STM0648   | leuS      | leucyl-tRNA synthetase                                | <b>0.06</b>  | 0.89126 |
| STM0649,S | STM0649,S | putative hydrolase                                    | <b>-0.15</b> | 0.84383 |
| STM0649,S | STM0649,S | putative hydrolase                                    | <b>0.12</b>  | 0.77217 |
| STM0650   | STM0650   | putative hydrolase                                    | <b>-0.30</b> | 0.50190 |
| STM0650   | STM0650   | putative hydrolase                                    | <b>0.48</b>  | 0.59526 |
| STM0651   | STM0651   | 2-keto-3-deoxygluconate permease                      | <b>-1.11</b> | 0.20065 |
| STM0651   | STM0651   | 2-keto-3-deoxygluconate permease                      | <b>0.00</b>  | 0.99887 |
| STM0652   | STM0652   | putative sigma-54 dependent transcriptional regulator | <b>0.15</b>  | 0.87999 |
| STM0652   | STM0652   | putative sigma-54 dependent transcriptional regulator | <b>0.85</b>  | 0.32373 |
| STM0653   | ybeL      | putative cytoplasmic protein                          | <b>0.21</b>  | 0.80637 |
| STM0653   | ybeL      | putative cytoplasmic protein                          | <b>0.45</b>  | 0.36444 |
| STM0654   | ybeQ      | tetratricopeptide repeat protein                      | <b>-0.29</b> | 0.60051 |
| STM0654   | ybeQ      | tetratricopeptide repeat protein                      | <b>0.35</b>  | 0.67097 |
| STM0655   | ybeR      | putative cytoplasmic protein                          | <b>-0.33</b> | 0.58822 |
| STM0655   | ybeR      | putative cytoplasmic protein                          | <b>0.20</b>  | 0.76622 |
| STM0656   | ybeS      | putative molecular chaperone                          | <b>-0.41</b> | 0.33167 |
| STM0656   | ybeS      | putative molecular chaperone                          | <b>0.43</b>  | 0.35248 |
| STM0657   | ybeU      | putative cytoplasmic protein                          | <b>-0.17</b> | 0.74434 |
| STM0657   | ybeU      | putative cytoplasmic protein                          | <b>-0.62</b> | 0.21019 |
| STM0657   | ybeU      | putative cytoplasmic protein                          | <b>0.21</b>  | 0.63075 |
| STM0657   | ybeU      | putative cytoplasmic protein                          | <b>-0.12</b> | 0.89004 |
| STM0658   | ybeV      | putative molecular chaperone                          | <b>-0.17</b> | 0.83718 |
| STM0658   | ybeV      | putative molecular chaperone                          | <b>-1.02</b> | 0.70229 |
| STM0659   | hscC      | putative heatshock protein                            | <b>0.00</b>  | 0.99902 |
| STM0659   | hscC      | putative heatshock protein                            | <b>0.32</b>  | 0.48600 |
| STM0660   | STM0660   | putative cytoplasmic protein                          | <b>0.33</b>  | 0.68232 |
| STM0660   | STM0660   | putative cytoplasmic protein                          | <b>0.85</b>  | 0.17139 |
| STM0661   | ybeK      | putative purine nucleoside hydrolase                  | <b>0.69</b>  | 0.16534 |
| STM0661   | ybeK      | putative purine nucleoside hydrolase                  | <b>0.93</b>  | 0.21880 |
| STM0662   | gltL      | glutamate/aspartate transporter                       | <b>-0.24</b> | 0.65305 |
| STM0662   | gltL      | glutamate/aspartate transporter                       | <b>0.08</b>  | 0.87512 |
| STM0663   | gltK      | glutamate/aspartate transporter                       | <b>0.13</b>  | 0.73473 |
| STM0663   | gltK      | glutamate/aspartate transporter                       | <b>1.19</b>  | 0.11690 |
| STM0664   | gltJ      | glutamate/aspartate transporter                       | <b>-0.68</b> | 0.68232 |
| STM0664   | gltJ      | glutamate/aspartate transporter                       | <b>0.79</b>  | 0.47479 |
| STM0665   | gltI      | glutamate/aspartate transporter                       | <b>-0.16</b> | 0.72677 |
| STM0665   | gltI      | glutamate/aspartate transporter                       | <b>1.07</b>  | 0.32093 |
| STM0666   | Int       | apolipoprotein N-acyltransferase                      | <b>0.00</b>  | 0.99583 |
| STM0666   | Int       | apolipoprotein N-acyltransferase                      | <b>0.09</b>  | 0.82964 |

|         |         |                                                             |              |         |
|---------|---------|-------------------------------------------------------------|--------------|---------|
| STM0667 | ybeX    | putative transport protein                                  | <b>-0.15</b> | 0.78667 |
| STM0667 | ybeX    | putative transport protein                                  | <b>0.29</b>  | 0.46927 |
| STM0668 | ybeY    | hypothetical protein STM0668                                | <b>-0.04</b> | 0.93699 |
| STM0668 | ybeY    | hypothetical protein STM0668                                | <b>-0.38</b> | 0.31280 |
| STM0669 | phoL    | putative phosphate starvation-inducible protein             | <b>-0.95</b> | 0.15276 |
| STM0669 | phoL    | putative phosphate starvation-inducible protein             | <b>-0.43</b> | 0.32170 |
| STM0670 | miaB    | rRNA modification protein                                   | <b>-0.68</b> | 0.18763 |
| STM0670 | miaB    | rRNA modification protein                                   | <b>-0.43</b> | 0.34201 |
| STM0671 | ubiF    | 2-octaprenyl-3-methyl-6-methoxy-1,4-benzoquinol hydroxylase | <b>0.16</b>  | 0.69398 |
| STM0671 | ubiF    | 2-octaprenyl-3-methyl-6-methoxy-1,4-benzoquinol hydroxylase | <b>0.08</b>  | 0.91874 |
| STM0672 | STM0672 | putative inner membrane protein                             | <b>-0.14</b> | 0.72821 |
| STM0672 | STM0672 | putative inner membrane protein                             | <b>0.02</b>  | 0.97645 |
| STM0674 | glnV    | STM0674                                                     | <b>-0.36</b> | 0.54461 |
| STM0674 | glnV    | STM0674                                                     | <b>-0.07</b> | 0.91387 |
| STM0674 | glnV    | STM0674                                                     | <b>0.00</b>  | 0.99512 |
| STM0674 | glnV    | STM0674                                                     | <b>0.65</b>  | 0.20285 |
| STM0677 | glnU    | STM0677                                                     | <b>-0.76</b> | 0.22540 |
| STM0677 | glnU    | STM0677                                                     | <b>-0.35</b> | 0.50555 |
| STM0677 | glnU    | STM0677                                                     | <b>-0.33</b> | 0.50811 |
| STM0677 | glnU    | STM0677                                                     | <b>0.19</b>  | 0.83084 |
| STM0678 | leuW    | STM0678                                                     | <b>-0.03</b> | 0.95177 |
| STM0678 | leuW    | STM0678                                                     | <b>0.17</b>  | 0.67264 |
| STM0679 | metT    | STM0679                                                     | <b>-0.22</b> | 0.85636 |
| STM0679 | metT    | STM0679                                                     | <b>-0.68</b> | 0.34051 |
| STM0679 | metT    | STM0679                                                     | <b>-0.08</b> | 0.91170 |
| STM0679 | metT    | STM0679                                                     | <b>-0.20</b> | 0.72970 |
| STM0680 | asnB    | asparagine synthetase B                                     | <b>-0.41</b> | 0.26910 |
| STM0680 | asnB    | asparagine synthetase B                                     | <b>-0.21</b> | 0.69797 |
| STM0681 | nagD    | putative phosphatase                                        | <b>-0.24</b> | 0.63222 |
| STM0681 | nagD    | putative phosphatase                                        | <b>0.13</b>  | 0.80754 |
| STM0682 | nagC    | N-acetylglucosamine operon transcriptional repressor        | <b>0.18</b>  | 0.68332 |
| STM0682 | nagC    | N-acetylglucosamine operon transcriptional repressor        | <b>0.51</b>  | 0.32055 |
| STM0683 | nagA    | N-acetylglucosamine-6-phosphate deacetylase                 | <b>-0.01</b> | 0.99213 |
| STM0683 | nagA    | N-acetylglucosamine-6-phosphate deacetylase                 | <b>0.14</b>  | 0.74361 |
| STM0684 | nagB    | glucosamine-6-phosphate deaminase                           | <b>0.04</b>  | 0.94134 |
| STM0684 | nagB    | glucosamine-6-phosphate deaminase                           | <b>0.57</b>  | 0.22602 |
| STM0685 | nagE    | N-acetylglucosamine-specific enzyme IIABC                   | <b>0.57</b>  | 0.17139 |
| STM0685 | nagE    | N-acetylglucosamine-specific enzyme IIABC                   | <b>0.72</b>  | 0.13645 |
| STM0686 | glnS    | glutaminyl-tRNA synthetase                                  | <b>-0.26</b> | 0.74243 |
| STM0686 | glnS    | glutaminyl-tRNA synthetase                                  | <b>0.12</b>  | 0.88339 |
| STM0687 | ybfM    | putative outer membrane protein                             | <b>-0.14</b> | 0.74556 |
| STM0687 | ybfM    | putative outer membrane protein                             | <b>0.28</b>  | 0.69398 |
| STM0688 | ybfN    | putative lipoprotein                                        | <b>-0.31</b> | 0.55338 |
| STM0688 | ybfN    | putative lipoprotein                                        | <b>0.63</b>  | 0.26378 |
| STM0689 | citA    | citrate-proton symporter                                    | <b>0.02</b>  | 0.97474 |
| STM0689 | citA    | citrate-proton symporter                                    | <b>-0.27</b> | 0.58887 |
| STM0690 | citB    | citrate utilization protein b                               | <b>-0.16</b> | 0.79668 |
| STM0690 | citB    | citrate utilization protein b                               | <b>0.57</b>  | 0.37836 |
| STM0691 | STM0691 | hypothetical protein STM0691                                | <b>0.04</b>  | 0.96568 |
| STM0691 | STM0691 | hypothetical protein STM0691                                | <b>0.49</b>  | 0.34148 |
| STM0692 | STM0692 | putative transcriptional regulator                          | <b>-0.01</b> | 0.99394 |
| STM0692 | STM0692 | putative transcriptional regulator                          | <b>0.37</b>  | 0.53827 |
| STM0693 | fur     | ferric uptake regulator                                     | <b>0.08</b>  | 0.85534 |
| STM0693 | fur     | ferric uptake regulator                                     | <b>-0.11</b> | 0.78641 |
| STM0694 | fldA    | flavodoxin                                                  | <b>-0.23</b> | 0.52101 |
| STM0694 | fldA    | flavodoxin                                                  | <b>0.12</b>  | 0.78822 |
| STM0695 | ybfE    | putative SOS response protein                               | <b>-0.12</b> | 0.76313 |
| STM0695 | ybfE    | putative SOS response protein                               | <b>-0.26</b> | 0.56769 |
| STM0696 | ybfF    | putative enzyme                                             | <b>-0.21</b> | 0.62757 |
| STM0696 | ybfF    | putative enzyme                                             | <b>0.03</b>  | 0.96278 |
| STM0697 | seqA    | sequestration protein A                                     | <b>-0.19</b> | 0.60010 |

|         |            |                                                   |              |         |
|---------|------------|---------------------------------------------------|--------------|---------|
| STM0697 | seqA       | sequestration protein A                           | <b>0.33</b>  | 0.37454 |
| STM0698 | pgm        | phosphoglucomutase                                | <b>-0.17</b> | 0.65549 |
| STM0698 | pgm        | phosphoglucomutase                                | <b>0.35</b>  | 0.46148 |
| STM0699 | STM0699    | putative cytoplasmic protein                      | <b>-0.31</b> | 0.49035 |
| STM0699 | STM0699    | putative cytoplasmic protein                      | <b>0.12</b>  | 0.81455 |
| STM0700 | potE       | putrescine/ornithine antiporter                   | <b>-0.55</b> | 0.25514 |
| STM0700 | potE       | putrescine/ornithine antiporter                   | <b>0.10</b>  | 0.86385 |
| STM0701 | speF       | ornithine decarboxylase isozyme                   | <b>-0.20</b> | 0.64371 |
| STM0701 | speF       | ornithine decarboxylase isozyme                   | <b>-0.16</b> | 0.79093 |
| STM0702 | kdpE       | response regulator                                | <b>-0.19</b> | 0.76622 |
| STM0702 | kdpE       | response regulator                                | <b>1.15</b>  | 0.13509 |
| STM0703 | kdpD       | sensor kinase                                     | <b>0.16</b>  | 0.66992 |
| STM0703 | kdpD       | sensor kinase                                     | <b>0.74</b>  | 0.15984 |
| STM0704 | kdpC       | potassium-transporting ATPase subunit C           | <b>0.12</b>  | 0.78572 |
| STM0704 | kdpC       | potassium-transporting ATPase subunit C           | <b>0.67</b>  | 0.38307 |
| STM0705 | kdpB       | potassium-transporting ATPase subunit B           | <b>-0.64</b> | 0.30748 |
| STM0705 | kdpB       | potassium-transporting ATPase subunit B           | <b>-0.74</b> | 0.34541 |
| STM0706 | kdpA       | potassium-transporting ATPase subunit A           | <b>0.65</b>  | 0.49336 |
| STM0706 | kdpA       | potassium-transporting ATPase subunit A           | <b>0.65</b>  | 0.29848 |
| STM0708 | ybfA       | putative periplasmic protein                      | <b>-0.35</b> | 0.46772 |
| STM0708 | ybfA       | putative periplasmic protein                      | <b>0.31</b>  | 0.63357 |
| STM0709 | phrB       | deoxyribodipyrimidine photolyase                  | <b>-0.23</b> | 0.67885 |
| STM0709 | phrB       | deoxyribodipyrimidine photolyase                  | <b>0.28</b>  | 0.51073 |
| STM0710 | ybgH       | putative POT family transport protein             | <b>-0.24</b> | 0.65130 |
| STM0710 | ybgH       | putative POT family transport protein             | <b>0.21</b>  | 0.62617 |
| STM0711 | ybgI       | putative cytoplasmic protein                      | <b>-0.36</b> | 0.37025 |
| STM0711 | ybgI       | putative cytoplasmic protein                      | <b>0.55</b>  | 0.22602 |
| STM0712 | ybgJ       | putative carboxylase                              | <b>-0.34</b> | 0.48360 |
| STM0712 | ybgJ       | putative carboxylase                              | <b>0.23</b>  | 0.57189 |
| STM0713 | ybgK       | putative carboxylase                              | <b>-0.04</b> | 0.93804 |
| STM0713 | ybgK       | putative carboxylase                              | <b>-0.02</b> | 0.95655 |
| STM0714 | ybgL       | hypothetical protein STM0714                      | <b>-0.09</b> | 0.84355 |
| STM0714 | ybgL       | hypothetical protein STM0714                      | <b>-0.08</b> | 0.89730 |
| STM0715 | STM0715    | putative cytoplasmic protein                      | <b>-0.51</b> | 0.42277 |
| STM0715 | STM0715    | putative cytoplasmic protein                      | <b>0.42</b>  | 0.43062 |
| STM0716 | VT_FimBE_C | putative phage integrase                          | <b>-0.77</b> | 0.27696 |
| STM0716 | VT_FimBE_C | putative phage integrase                          | <b>0.17</b>  | 0.69297 |
| STM0719 | STM0719    | putative UDP-galactopyranose mutase               | <b>-0.87</b> | 0.21747 |
| STM0719 | STM0719    | putative UDP-galactopyranose mutase               | <b>-0.20</b> | 0.64727 |
| STM0719 | STM0719    | putative UDP-galactopyranose mutase               | <b>-0.10</b> | 0.82667 |
| STM0719 | STM0719    | putative UDP-galactopyranose mutase               | <b>0.43</b>  | 0.39910 |
| STM0719 | STM0719    | putative UDP-galactopyranose mutase               | <b>0.93</b>  | 0.31305 |
| STM0719 | STM0719    | putative UDP-galactopyranose mutase               | <b>0.19</b>  | 0.79631 |
| STM0720 | STM0720    | putative glycosyl transferase                     | <b>-0.01</b> | 0.98066 |
| STM0720 | STM0720    | putative glycosyl transferase                     | <b>-0.13</b> | 0.88415 |
| STM0721 | STM0721    | putative glycosyl transferase                     | <b>0.16</b>  | 0.71139 |
| STM0721 | STM0721    | putative glycosyl transferase                     | <b>0.76</b>  | 0.16631 |
| STM0722 | STM0722    | putative ABC transporter permease protein         | <b>-0.11</b> | 0.87330 |
| STM0722 | STM0722    | putative ABC transporter permease protein         | <b>0.00</b>  | 0.99742 |
|         |            | putative ABC-type polysaccharide/polyol phosphate |              |         |
| STM0723 | STM0723    | transport system                                  | <b>-1.18</b> | 0.11879 |
|         |            | putative ABC-type polysaccharide/polyol phosphate |              |         |
| STM0723 | STM0723    | transport system                                  | <b>-0.15</b> | 0.82350 |
| STM0724 | STM0724    | putative glycosyltransferase                      | <b>-0.14</b> | 0.87154 |
| STM0724 | STM0724    | putative glycosyltransferase                      | <b>0.08</b>  | 0.92506 |
| STM0725 | STM0725    | putative glycosyltransferase                      | <b>-0.21</b> | 0.73473 |
| STM0725 | STM0725    | putative glycosyltransferase                      | <b>0.16</b>  | 0.69988 |
| STM0726 | STM0726    | putative glycosyl transferase                     | <b>-0.39</b> | 0.36017 |
| STM0726 | STM0726    | putative glycosyl transferase                     | <b>1.03</b>  | 0.19398 |
| STM0728 | nei        | endonuclease VIII                                 | <b>-0.20</b> | 0.58903 |
| STM0728 | nei        | endonuclease VIII                                 | <b>0.74</b>  | 0.19843 |
| STM0729 | abrB       | putative transport protein                        | <b>-0.04</b> | 0.95876 |
| STM0729 | abrB       | putative transport protein                        | <b>-0.08</b> | 0.91937 |

|           |           |                                                      |              |         |
|-----------|-----------|------------------------------------------------------|--------------|---------|
| STM0730   | gltA      | citrate synthase                                     | <b>0.18</b>  | 0.70249 |
| STM0730   | gltA      | citrate synthase                                     | <b>0.40</b>  | 0.53062 |
|           |           | succinate dehydrogenase cytochrome b556 large        |              |         |
| STM0732   | sdhC      | membrane subunit                                     | <b>0.77</b>  | 0.23181 |
|           |           | succinate dehydrogenase cytochrome b556 large        |              |         |
| STM0732   | sdhC      | membrane subunit                                     | <b>0.88</b>  | 0.16281 |
|           |           | succinate dehydrogenase cytochrome b556 small        |              |         |
| STM0733   | sdhD      | membrane subunit                                     | <b>0.66</b>  | 0.21677 |
|           |           | succinate dehydrogenase cytochrome b556 small        |              |         |
| STM0733   | sdhD      | membrane subunit                                     | <b>0.43</b>  | 0.34913 |
| STM0734   | sdhA      | succinate dehydrogenase catalytic subunit            | <b>0.30</b>  | 0.68258 |
| STM0734   | sdhA      | succinate dehydrogenase catalytic subunit            | <b>0.45</b>  | 0.39635 |
| STM0735   | sdhB      | succinate dehydrogenase catalytic subunit            | <b>0.33</b>  | 0.50190 |
| STM0735   | sdhB      | succinate dehydrogenase catalytic subunit            | <b>0.51</b>  | 0.40947 |
| STM0736   | sucA      | 2-oxoglutarate dehydrogenase                         | <b>0.62</b>  | 0.38596 |
| STM0736   | sucA      | 2-oxoglutarate dehydrogenase                         | <b>0.66</b>  | 0.38044 |
| STM0737   | sucB      | dihydrolipoamide acetyltransferase                   | <b>0.45</b>  | 0.55649 |
| STM0737   | sucB      | dihydrolipoamide acetyltransferase                   | <b>0.44</b>  | 0.51116 |
| STM0738   | sucC      | succinyl-CoA synthetase subunit beta                 | <b>0.30</b>  | 0.60423 |
| STM0738   | sucC      | succinyl-CoA synthetase subunit beta                 | <b>0.33</b>  | 0.65130 |
| STM0739   | sucD      | succinyl-CoA synthetase alpha subunit                | <b>-0.50</b> | 0.42008 |
| STM0739   | sucD      | succinyl-CoA synthetase alpha subunit                | <b>0.35</b>  | 0.53840 |
| STM0740   | cydA      | cytochrome d terminal oxidase polypeptide subunit I  | <b>0.05</b>  | 0.91915 |
| STM0740   | cydA      | cytochrome d terminal oxidase polypeptide subunit I  | <b>0.05</b>  | 0.93639 |
| STM0741   | cydB      | cytochrome d terminal oxidase polypeptide subunit II | <b>-0.29</b> | 0.45047 |
| STM0741   | cydB      | cytochrome d terminal oxidase polypeptide subunit II | <b>-0.27</b> | 0.50267 |
| STM0742   | ybgT      | putative outer membrane lipoprotein                  | <b>-0.32</b> | 0.41545 |
| STM0742   | ybgT      | putative outer membrane lipoprotein                  | <b>-0.29</b> | 0.58506 |
| STM0743   | ybgE      | putative inner membrane lipoprotein                  | <b>-0.15</b> | 0.69462 |
| STM0743   | ybgE      | putative inner membrane lipoprotein                  | <b>-0.25</b> | 0.58108 |
| STM0744   | ybgC      | putative esterase                                    | <b>-0.21</b> | 0.55482 |
| STM0744   | ybgC      | putative esterase                                    | <b>-0.03</b> | 0.95608 |
| STM0745   | tolQ      | Tol import system inner membrane protein             | <b>-0.05</b> | 0.91456 |
| STM0745   | tolQ      | Tol import system inner membrane protein             | <b>0.35</b>  | 0.41329 |
| STM0746   | tolR      | Tol import sytem inner membrane protein              | <b>-0.16</b> | 0.76651 |
| STM0746   | tolR      | Tol import sytem inner membrane protein              | <b>0.02</b>  | 0.97361 |
| STM0747   | tolA      | cell envelope integrity inner membrane protein TolA  | <b>-0.57</b> | 0.19142 |
| STM0747   | tolA      | cell envelope integrity inner membrane protein TolA  | <b>-0.25</b> | 0.55482 |
| STM0748   | tolB      | translocation protein TolB precursor                 | <b>-0.08</b> | 0.84611 |
| STM0748   | tolB      | translocation protein TolB precursor                 | <b>0.17</b>  | 0.70726 |
| STM0749   | pal       | peptidoglycan-associated lipoprotein precursor       | <b>-0.05</b> | 0.92014 |
| STM0749   | pal       | peptidoglycan-associated lipoprotein precursor       | <b>0.10</b>  | 0.80406 |
| STM0750   | ybgF      | putative periplasmic protein                         | <b>-0.58</b> | 0.17074 |
| STM0750   | ybgF      | putative periplasmic protein                         | <b>0.15</b>  | 0.72976 |
| STM0756   | nadA      | quinolinate synthetase                               | <b>-0.20</b> | 0.56800 |
| STM0756   | nadA      | quinolinate synthetase                               | <b>-0.15</b> | 0.81862 |
| STM0757   | pnuC      | nucleoside/purine/pyrimidine transporter             | <b>-0.23</b> | 0.52151 |
| STM0757   | pnuC      | nucleoside/purine/pyrimidine transporter             | <b>-0.08</b> | 0.90462 |
| STM0758   | ybgR      | zinc transporter ZitB                                | <b>-0.20</b> | 0.59984 |
| STM0758   | ybgR      | zinc transporter ZitB                                | <b>0.04</b>  | 0.94990 |
| STM0759   | ybgS      | hypothetical protein STM0759                         | <b>-0.23</b> | 0.69392 |
| STM0759   | ybgS      | hypothetical protein STM0759                         | <b>0.67</b>  | 0.22602 |
| STM0760   | aroG      | 3-deoxy-7-phosphoheptulonate synthase                | <b>0.19</b>  | 0.72247 |
| STM0760   | aroG      | 3-deoxy-7-phosphoheptulonate synthase                | <b>0.30</b>  | 0.49336 |
| STM0761   | STM0761   | fumarate hydratase                                   | <b>-0.09</b> | 0.85801 |
| STM0761   | STM0761   | fumarate hydratase                                   | <b>-0.04</b> | 0.96164 |
| STM0762   | STM0762   | fumarate hydratase                                   | <b>0.25</b>  | 0.58570 |
| STM0762   | STM0762   | fumarate hydratase                                   | <b>0.19</b>  | 0.81121 |
| STM0763,s | STM0763,s | transcriptional regulator                            | <b>-0.49</b> | 0.34698 |
| STM0763,s | STM0763,s | transcriptional regulator                            | <b>-0.14</b> | 0.84673 |
| STM0764   | STM0764   | transcriptional regulator                            | <b>-0.13</b> | 0.89233 |
| STM0764   | STM0764   | transcriptional regulator                            | <b>-0.30</b> | 0.73541 |
| STM0765   | STM0765   | putative cation transporter                          | <b>0.01</b>  | 0.98228 |

|         |         |                                                        |              |         |
|---------|---------|--------------------------------------------------------|--------------|---------|
| STM0765 | STM0765 | putative cation transporter                            | <b>0.23</b>  | 0.63849 |
| STM0766 | dcoC    | putative oxaloacetate decarboxylase subunit gamma      | <b>-0.21</b> | 0.65730 |
| STM0766 | dcoC    | putative oxaloacetate decarboxylase subunit gamma      | <b>0.63</b>  | 0.20065 |
| STM0769 | STM0769 | putative cytoplasmic protein                           | <b>-0.46</b> | 0.52364 |
| STM0769 | STM0769 | putative cytoplasmic protein                           | <b>0.13</b>  | 0.76483 |
| STM0770 | STM0770 | putative ABC transport protein                         | <b>-0.58</b> | 0.19843 |
| STM0770 | STM0770 | putative ABC transport protein                         | <b>-0.05</b> | 0.92871 |
|         |         | putative ABC-type cobalamin/Fe3+-siderophore transport |              |         |
| STM0771 | STM0771 | component                                              | <b>-0.21</b> | 0.65377 |
|         |         | putative ABC-type cobalamin/Fe3+-siderophore transport |              |         |
| STM0771 | STM0771 | component                                              | <b>-0.14</b> | 0.79308 |
| STM0772 | gpmA    | phosphoglyceromutase                                   | <b>-0.41</b> | 0.29044 |
| STM0772 | gpmA    | phosphoglyceromutase                                   | <b>0.04</b>  | 0.93023 |
| STM0773 | galM    | galactose-1-epimerase                                  | <b>0.16</b>  | 0.65592 |
| STM0773 | galM    | galactose-1-epimerase                                  | <b>0.16</b>  | 0.69882 |
| STM0774 | galK    | galactokinase                                          | <b>-0.61</b> | 0.23449 |
| STM0774 | galK    | galactokinase                                          | <b>-0.21</b> | 0.62403 |
| STM0775 | galT    | galactose-1-phosphate uridylyltransferase              | <b>0.12</b>  | 0.77425 |
| STM0775 | galT    | galactose-1-phosphate uridylyltransferase              | <b>0.09</b>  | 0.85228 |
| STM0776 | galE    | UDP-galactose 4-epimerase                              | <b>-0.45</b> | 0.45041 |
| STM0776 | galE    | UDP-galactose 4-epimerase                              | <b>-0.11</b> | 0.78335 |
| STM0777 | STM0777 | putative inner membrane protein                        | <b>0.20</b>  | 0.61809 |
| STM0777 | STM0777 | putative inner membrane protein                        | <b>0.28</b>  | 0.65377 |
| STM0778 | modF    | putative molybdenum transporter                        | <b>-0.04</b> | 0.93720 |
| STM0778 | modF    | putative molybdenum transporter                        | <b>0.43</b>  | 0.30607 |
| STM0779 | modE    | molybdate uptake operon transcriptional repressor      | <b>-0.11</b> | 0.81419 |
| STM0779 | modE    | molybdate uptake operon transcriptional repressor      | <b>-0.04</b> | 0.95537 |
| STM0781 | modA    | molybdate transporter                                  | <b>0.15</b>  | 0.69882 |
| STM0781 | modA    | molybdate transporter                                  | <b>0.25</b>  | 0.71356 |
| STM0782 | modB    | molybdate transport permease protein                   | <b>-0.27</b> | 0.48210 |
| STM0782 | modB    | molybdate transport permease protein                   | <b>0.38</b>  | 0.44208 |
| STM0783 | modC    | molybdate transporter                                  | <b>-0.11</b> | 0.79356 |
| STM0783 | modC    | molybdate transporter                                  | <b>0.31</b>  | 0.41687 |
| STM0784 | ybhA    | putative hydrolase                                     | <b>-0.07</b> | 0.87655 |
| STM0784 | ybhA    | putative hydrolase                                     | <b>0.00</b>  | 0.99856 |
| STM0785 | ybhE    | putative 3-carboxymuconate cyclase                     | <b>-0.36</b> | 0.40289 |
| STM0785 | ybhE    | putative 3-carboxymuconate cyclase                     | <b>0.12</b>  | 0.75510 |
| STM0786 | ybhC    | putative pectinesterase                                | <b>-0.34</b> | 0.35366 |
| STM0786 | ybhC    | putative pectinesterase                                | <b>0.23</b>  | 0.49502 |
| STM0787 | hutI    | imidazolonepropionase                                  | <b>-0.91</b> | 0.16658 |
| STM0787 | hutI    | imidazolonepropionase                                  | <b>-0.02</b> | 0.97050 |
| STM0788 | hutG    | formimidoylglutamase                                   | <b>-0.20</b> | 0.66229 |
| STM0788 | hutG    | formimidoylglutamase                                   | <b>0.10</b>  | 0.84687 |
| STM0789 | hutC    | histidine utilization repressor                        | <b>0.05</b>  | 0.92513 |
| STM0789 | hutC    | histidine utilization repressor                        | <b>-0.24</b> | 0.72518 |
| STM0791 | hutH    | histidine ammonia-lyase                                | <b>0.22</b>  | 0.74359 |
| STM0791 | hutH    | histidine ammonia-lyase                                | <b>-0.25</b> | 0.73356 |
| STM0792 | ybhB    | putative phospholipid-binding protein                  | <b>-0.19</b> | 0.61824 |
| STM0792 | ybhB    | putative phospholipid-binding protein                  | <b>0.46</b>  | 0.27383 |
|         |         | adenosylmethionine--8-amino-7-oxononanoate             |              |         |
| STM0793 | bioA    | transaminase                                           | <b>-0.61</b> | 0.18265 |
|         |         | adenosylmethionine--8-amino-7-oxononanoate             |              |         |
| STM0793 | bioA    | transaminase                                           | <b>0.08</b>  | 0.86190 |
| STM0794 | bioB    | biotin synthetase                                      | <b>0.06</b>  | 0.93841 |
| STM0794 | bioB    | biotin synthetase                                      | <b>0.98</b>  | 0.22602 |
| STM0795 | bioF    | 8-amino-7-oxononanoate synthase                        | <b>0.82</b>  | 0.53099 |
| STM0795 | bioF    | 8-amino-7-oxononanoate synthase                        | <b>1.58</b>  | 0.27453 |
| STM0796 | bioC    | biotin biosynthetic protein                            | <b>-0.18</b> | 0.63101 |
| STM0796 | bioC    | biotin biosynthetic protein                            | <b>0.42</b>  | 0.31049 |
| STM0797 | bioD    | dithiobiotin synthetase                                | <b>-0.32</b> | 0.73653 |
| STM0797 | bioD    | dithiobiotin synthetase                                | <b>0.50</b>  | 0.44552 |
| STM0798 | uvrB    | excinuclease ABC subunit B                             | <b>-0.01</b> | 0.98879 |
| STM0798 | uvrB    | excinuclease ABC subunit B                             | <b>-0.20</b> | 0.73698 |

|         |         |                                                               |              |         |
|---------|---------|---------------------------------------------------------------|--------------|---------|
| STM0800 | slrP    | leucine-rich repeat protein                                   | <b>-0.43</b> | 0.44208 |
| STM0800 | slrP    | leucine-rich repeat protein                                   | <b>0.65</b>  | 0.24520 |
| STM0801 | ybhK    | putative cytoplasmic protein                                  | <b>-0.06</b> | 0.94426 |
| STM0801 | ybhK    | putative cytoplasmic protein                                  | <b>0.51</b>  | 0.35853 |
| STM0802 | moaA    | molybdenum cofactor biosynthesis protein A                    | <b>0.10</b>  | 0.82338 |
| STM0802 | moaA    | molybdenum cofactor biosynthesis protein A                    | <b>0.18</b>  | 0.65612 |
| STM0803 | moaB    | molybdopterin biosynthetic protein B                          | <b>-0.40</b> | 0.38894 |
| STM0803 | moaB    | molybdopterin biosynthetic protein B                          | <b>-0.06</b> | 0.89546 |
| STM0804 | moaC    | molybdenum cofactor biosynthesis protein C                    | <b>0.07</b>  | 0.89111 |
| STM0804 | moaC    | molybdenum cofactor biosynthesis protein C                    | <b>-0.05</b> | 0.94179 |
| STM0805 | moaD    | molybdopterin biosynthetic protein                            | <b>0.05</b>  | 0.95081 |
| STM0805 | moaD    | molybdopterin biosynthetic protein                            | <b>0.45</b>  | 0.33651 |
| STM0806 | moaE    | molybdopterin converting factor subunit 2                     | <b>-0.09</b> | 0.83497 |
| STM0806 | moaE    | molybdopterin converting factor subunit 2                     | <b>-0.22</b> | 0.52364 |
| STM0807 | ybhL    | putative permease                                             | <b>-0.18</b> | 0.63153 |
| STM0807 | ybhL    | putative permease                                             | <b>-0.04</b> | 0.93235 |
| STM0808 | ybhM    | putative integral membrane protein                            | <b>0.15</b>  | 0.78332 |
| STM0808 | ybhM    | putative integral membrane protein                            | <b>-0.24</b> | 0.62988 |
| STM0809 | STM0809 | putative inner membrane protein                               | <b>-0.50</b> | 0.31242 |
| STM0809 | STM0809 | putative inner membrane protein                               | <b>0.17</b>  | 0.85340 |
| STM0810 | STM0810 | putative inner membrane protein                               | <b>-0.21</b> | 0.59824 |
| STM0810 | STM0810 | putative inner membrane protein                               | <b>0.32</b>  | 0.70726 |
| STM0811 | ybhN    | hypothetical protein STM0811                                  | <b>0.31</b>  | 0.67097 |
| STM0811 | ybhN    | hypothetical protein STM0811                                  | <b>1.26</b>  | 0.13645 |
| STM0812 | ybhO    | cardiolipin synthase                                          | <b>-0.39</b> | 0.66677 |
| STM0812 | ybhO    | cardiolipin synthase                                          | <b>0.33</b>  | 0.75208 |
| STM0813 | ybhP    | putative cytoplasmic protein                                  | <b>-0.33</b> | 0.62757 |
| STM0813 | ybhP    | putative cytoplasmic protein                                  | <b>-0.10</b> | 0.89640 |
| STM0814 | ybhQ    | putative inner membrane protein                               | <b>0.10</b>  | 0.86968 |
| STM0814 | ybhQ    | putative inner membrane protein                               | <b>0.06</b>  | 0.92637 |
| STM0815 | ybhR    | putative transport protein                                    | <b>-0.07</b> | 0.91937 |
| STM0815 | ybhR    | putative transport protein                                    | <b>-0.37</b> | 0.44137 |
| STM0816 | ybhS    | putative transport protein                                    | <b>-0.46</b> | 0.21840 |
| STM0816 | ybhS    | putative transport protein                                    | <b>0.20</b>  | 0.66594 |
| STM0817 | ybhF    | putative ABC-type multidrug transport system ATPase component | <b>-0.10</b> | 0.79271 |
| STM0817 | ybhF    | putative ABC-type multidrug transport system ATPase component | <b>0.33</b>  | 0.35248 |
| STM0818 | STM0818 | hypothetical protein STM0818                                  | <b>-0.52</b> | 0.20151 |
| STM0818 | STM0818 | hypothetical protein STM0818                                  | <b>0.20</b>  | 0.76313 |
| STM0819 | ybiH    | putative transcriptional repressor                            | <b>-0.31</b> | 0.56200 |
| STM0819 | ybiH    | putative transcriptional repressor                            | <b>-0.07</b> | 0.88018 |
| STM0820 | rhIE    | putative ATP-dependent RNA helicase                           | <b>0.06</b>  | 0.91170 |
| STM0820 | rhIE    | putative ATP-dependent RNA helicase                           | <b>0.17</b>  | 0.70199 |
| STM0821 | dinG    | SOS repair enzyme                                             | <b>-0.17</b> | 0.70458 |
| STM0821 | dinG    | SOS repair enzyme                                             | <b>0.61</b>  | 0.18918 |
| STM0822 | ybiB    | hypothetical protein STM0822                                  | <b>0.07</b>  | 0.95836 |
| STM0822 | ybiB    | hypothetical protein STM0822                                  | <b>-0.36</b> | 0.58071 |
| STM0823 | ybiJ    | putative periplasmic protein                                  | <b>-0.22</b> | 0.65196 |
| STM0823 | ybiJ    | putative periplasmic protein                                  | <b>-0.13</b> | 0.78973 |
| STM0825 | ybiI    | hypothetical protein STM0825                                  | <b>0.02</b>  | 0.98615 |
| STM0825 | ybiI    | hypothetical protein STM0825                                  | <b>0.16</b>  | 0.82350 |
| STM0826 | ybiN    | putative SAM-dependent methyltransferase                      | <b>0.10</b>  | 0.86108 |
| STM0826 | ybiN    | putative SAM-dependent methyltransferase                      | <b>0.16</b>  | 0.81449 |
| STM0827 | ybiO    | putative transport protein                                    | <b>-0.17</b> | 0.67351 |
| STM0827 | ybiO    | putative transport protein                                    | <b>0.05</b>  | 0.91484 |
| STM0828 | glnQ    | glutamine ABC transporter ATP-binding component               | <b>0.04</b>  | 0.94368 |
| STM0828 | glnQ    | glutamine ABC transporter ATP-binding component               | <b>0.71</b>  | 0.12727 |
| STM0829 | glnP    | glutamine ABC transporter permease component                  | <b>0.61</b>  | 0.34666 |
| STM0829 | glnP    | glutamine ABC transporter permease component                  | <b>0.48</b>  | 0.36407 |
| STM0830 | glnH    | glutamine ABC transporter periplasmic-binding protein         | <b>0.11</b>  | 0.79924 |
| STM0830 | glnH    | glutamine ABC transporter periplasmic-binding protein         | <b>0.58</b>  | 0.17603 |
| STM0831 | dps     | DNA protection during starvation conditions                   | <b>0.38</b>  | 0.35824 |

|         |         |                                                      |              |         |
|---------|---------|------------------------------------------------------|--------------|---------|
| STM0831 | dps     | DNA protection during starvation conditions          | <b>0.15</b>  | 0.74374 |
| STM0832 | ybiF    | putative permease                                    | <b>0.06</b>  | 0.91170 |
| STM0832 | ybiF    | putative permease                                    | <b>-0.05</b> | 0.94421 |
| STM0833 | ompX    | outer membrane protein X                             | <b>-0.32</b> | 0.41443 |
| STM0833 | ompX    | outer membrane protein X                             | <b>-0.21</b> | 0.59455 |
| STM0834 | ybiP    | putative Integral membrane protein                   | <b>-0.19</b> | 0.63887 |
| STM0834 | ybiP    | putative Integral membrane protein                   | <b>-0.08</b> | 0.83897 |
| STM0835 | STM0835 | putative Mn-dependent transcriptional regulator      | <b>-0.44</b> | 0.34793 |
| STM0835 | STM0835 | putative Mn-dependent transcriptional regulator      | <b>-0.01</b> | 0.98539 |
| STM0836 | ybiR    | putative transporter                                 | <b>0.24</b>  | 0.59096 |
| STM0836 | ybiR    | putative transporter                                 | <b>0.06</b>  | 0.92197 |
| STM0837 | ybiS    | putative periplasmic protein                         | <b>0.11</b>  | 0.80527 |
| STM0837 | ybiS    | putative periplasmic protein                         | <b>0.31</b>  | 0.37610 |
| STM0838 | ybiT    | putative ABC transporter ATPase component            | <b>0.05</b>  | 0.94573 |
| STM0838 | ybiT    | putative ABC transporter ATPase component            | <b>0.12</b>  | 0.87512 |
| STM0839 | STM0839 | putative inner membrane protein                      | <b>-0.06</b> | 0.91387 |
| STM0839 | STM0839 | putative inner membrane protein                      | <b>0.33</b>  | 0.45861 |
| STM0840 | ybiV(2) | putative hydrolase                                   | <b>-0.56</b> | 0.35824 |
| STM0840 | ybiV(2) | putative hydrolase                                   | <b>-0.26</b> | 0.72092 |
| STM0841 | ybiU    | putative cytoplasmic protein                         | <b>-0.23</b> | 0.60552 |
| STM0841 | ybiU    | putative cytoplasmic protein                         | <b>0.18</b>  | 0.66743 |
| STM0842 | ybiV(1) | putative hydrolase                                   | <b>0.17</b>  | 0.75017 |
| STM0842 | ybiV(1) | putative hydrolase                                   | <b>0.56</b>  | 0.28991 |
| STM0843 | pflF    | putative pyruvate formate lyase                      | <b>0.04</b>  | 0.95107 |
| STM0843 | pflF    | putative pyruvate formate lyase                      | <b>0.93</b>  | 0.11690 |
| STM0844 | pflE    | putative pyruvate formate lyase activating enzyme    | <b>-1.05</b> | 0.17074 |
| STM0844 | pflE    | putative pyruvate formate lyase activating enzyme    | <b>-0.02</b> | 0.98332 |
| STM0845 | moeB    | molybdopterin biosynthesis protein MoeB              | <b>0.11</b>  | 0.84436 |
| STM0845 | moeB    | molybdopterin biosynthesis protein MoeB              | <b>0.53</b>  | 0.40891 |
| STM0846 | moeA    | molybdopterin biosynthesis protein                   | <b>-0.16</b> | 0.70229 |
| STM0846 | moeA    | molybdopterin biosynthesis protein                   | <b>0.20</b>  | 0.68474 |
| STM0847 | ybiK    | putative asparaginase                                | <b>-0.41</b> | 0.54424 |
| STM0847 | ybiK    | putative asparaginase                                | <b>-0.09</b> | 0.87135 |
| STM0848 | yliA    | putative ABC transporter ATPase components           | <b>0.08</b>  | 0.85513 |
| STM0848 | yliA    | putative ABC transporter ATPase components           | <b>0.45</b>  | 0.31242 |
| STM0849 | yliB    | putative ABC transporter periplasmic binding protein | <b>-0.24</b> | 0.66677 |
| STM0849 | yliB    | putative ABC transporter periplasmic binding protein | <b>-0.01</b> | 0.99182 |
| STM0850 | yliC    | putative ABC transporter periplasmic binding protein | <b>-0.12</b> | 0.76970 |
| STM0850 | yliC    | putative ABC transporter periplasmic binding protein | <b>0.11</b>  | 0.83443 |
| STM0851 | yliD    | putative ABC transporter inner membrane component    | <b>-0.35</b> | 0.40562 |
| STM0851 | yliD    | putative ABC transporter inner membrane component    | <b>-0.18</b> | 0.65012 |
| STM0852 | yliG    | putative FeS oxidoreductase                          | <b>-0.88</b> | 0.13206 |
| STM0852 | yliG    | putative FeS oxidoreductase                          | <b>-0.18</b> | 0.67908 |
| STM0853 | yliH    | putative cytoplasmic protein                         | <b>-0.02</b> | 0.98135 |
| STM0853 | yliH    | putative cytoplasmic protein                         | <b>0.15</b>  | 0.76989 |
| STM0854 | STM0854 | putative cytoplasmic protein                         | <b>-0.47</b> | 0.44998 |
| STM0854 | STM0854 | putative cytoplasmic protein                         | <b>0.24</b>  | 0.75706 |
| STM0855 | STM0855 | putative electron transfer protein beta subunit      | <b>-0.46</b> | 0.36017 |
| STM0855 | STM0855 | putative electron transfer protein beta subunit      | <b>0.35</b>  | 0.49496 |
| STM0856 | STM0856 | putative electron transfer protein alpha subunit     | <b>-0.30</b> | 0.54162 |
| STM0856 | STM0856 | putative electron transfer protein alpha subunit     | <b>0.16</b>  | 0.82986 |
| STM0857 | STM0857 | putative acyl-CoA dehydrogenase                      | <b>-0.07</b> | 0.89445 |
| STM0857 | STM0857 | putative acyl-CoA dehydrogenase                      | <b>0.41</b>  | 0.42721 |
| STM0858 | STM0858 | putative dehydrogenase                               | <b>-0.64</b> | 0.15331 |
| STM0858 | STM0858 | putative dehydrogenase                               | <b>0.34</b>  | 0.55338 |
| STM0859 | STM0859 | putative transcriptional regulator                   | <b>-0.04</b> | 0.95546 |
| STM0859 | STM0859 | putative transcriptional regulator                   | <b>0.22</b>  | 0.58155 |
| STM0860 | STM0860 | putative inner membrane protein                      | <b>-0.26</b> | 0.58117 |
| STM0860 | STM0860 | putative inner membrane protein                      | <b>-0.17</b> | 0.79708 |
| STM0862 | yliJ    | putative glutathione S-transferase                   | <b>-0.46</b> | 0.29912 |
| STM0862 | yliJ    | putative glutathione S-transferase                   | <b>-0.63</b> | 0.33983 |
| STM0863 | dacC    | D-alanyl-D-alanine carboxypeptidase                  | <b>-0.19</b> | 0.58300 |
| STM0863 | dacC    | D-alanyl-D-alanine carboxypeptidase                  | <b>-0.48</b> | 0.24520 |

|         |         |                                              |              |         |
|---------|---------|----------------------------------------------|--------------|---------|
| STM0864 | deoR    | deoxyribose operon transcriptional repressor | <b>-0.32</b> | 0.46199 |
| STM0864 | deoR    | deoxyribose operon transcriptional repressor | <b>0.39</b>  | 0.43674 |
| STM0865 | ybjG    | putative permease                            | <b>-0.71</b> | 0.15859 |
| STM0865 | ybjG    | putative permease                            | <b>-0.57</b> | 0.20285 |
| STM0866 | mdfA    | multidrug translocase                        | <b>-0.12</b> | 0.86947 |
| STM0866 | mdfA    | multidrug translocase                        | <b>0.63</b>  | 0.26856 |
| STM0867 | STM0867 | putative hydrolase                           | <b>-0.25</b> | 0.64727 |
| STM0867 | STM0867 | putative hydrolase                           | <b>-0.35</b> | 0.46927 |
| STM0868 | STM0868 | putative transport protein/regulator         | <b>0.33</b>  | 0.55355 |
| STM0868 | STM0868 | putative transport protein/regulator         | <b>0.77</b>  | 0.19425 |
| STM0869 | STM0869 | putative regulatory protein                  | <b>-0.72</b> | 0.13206 |
| STM0869 | STM0869 | putative regulatory protein                  | <b>0.09</b>  | 0.85149 |
| STM0870 | STM0870 | hypothetical protein STM0870                 | <b>-0.25</b> | 0.52208 |
| STM0870 | STM0870 | hypothetical protein STM0870                 | <b>0.32</b>  | 0.49336 |
| STM0871 | ybjM    | putative inner membrane protein              | <b>0.18</b>  | 0.64730 |
| STM0871 | ybjM    | putative inner membrane protein              | <b>0.22</b>  | 0.61643 |
| STM0872 | grxA    | glutaredoxin 1                               | <b>-0.08</b> | 0.86718 |
| STM0872 | grxA    | glutaredoxin 1                               | <b>0.28</b>  | 0.51863 |
| STM0873 | ybjC    | putative inner membrane protein              | <b>-0.33</b> | 0.40096 |
| STM0873 | ybjC    | putative inner membrane protein              | <b>0.11</b>  | 0.77346 |
| STM0874 | mdaA    | oxygen-insensitive NADPH nitroreductase      | <b>-0.35</b> | 0.41153 |
| STM0874 | mdaA    | oxygen-insensitive NADPH nitroreductase      | <b>-0.05</b> | 0.94087 |
| STM0875 | rimK    | ribosomal protein S6 modification protein    | <b>-0.05</b> | 0.92262 |
| STM0875 | rimK    | ribosomal protein S6 modification protein    | <b>-0.19</b> | 0.71783 |
| STM0876 | ybjN    | putative cytoplasmic protein                 | <b>-0.72</b> | 0.22521 |
| STM0876 | ybjN    | putative cytoplasmic protein                 | <b>-0.26</b> | 0.48563 |
| STM0877 | potF    | putrescine transporter                       | <b>0.34</b>  | 0.37836 |
| STM0877 | potF    | putrescine transporter                       | <b>0.36</b>  | 0.49009 |
| STM0878 | potG    | putrescine transporter                       | <b>-0.34</b> | 0.82637 |
| STM0878 | potG    | putrescine transporter                       | <b>1.27</b>  | 0.17595 |
| STM0879 | potH    | putrescine transporter                       | <b>0.06</b>  | 0.96775 |
| STM0879 | potH    | putrescine transporter                       | <b>0.50</b>  | 0.76622 |
| STM0880 | potI    | putrescine transporter                       | <b>-0.50</b> | 0.34449 |
| STM0880 | potI    | putrescine transporter                       | <b>0.06</b>  | 0.89004 |
| STM0881 | ybjO    | putative inner membrane protein              | <b>-0.14</b> | 0.81946 |
| STM0881 | ybjO    | putative inner membrane protein              | <b>0.21</b>  | 0.65730 |
| STM0882 | ybjF    | 23S rRNA (uracil-5-)-methyltransferase       | <b>0.01</b>  | 0.99295 |
| STM0882 | ybjF    | 23S rRNA (uracil-5-)-methyltransferase       | <b>0.31</b>  | 0.48600 |
| STM0884 | ulaA    | ascorbate-specific PTS system enzyme IIC     | <b>-0.31</b> | 0.43219 |
| STM0884 | ulaA    | ascorbate-specific PTS system enzyme IIC     | <b>0.50</b>  | 0.61285 |
| STM0885 | STM0885 | putative inner membrane protein              | <b>-0.26</b> | 0.72700 |
| STM0885 | STM0885 | putative inner membrane protein              | <b>0.03</b>  | 0.96896 |
| STM0886 | STM0886 | putative sulfatase                           | <b>0.10</b>  | 0.85513 |
| STM0886 | STM0886 | putative sulfatase                           | <b>-0.17</b> | 0.74626 |
| STM0887 | artJ    | arginine transport system component          | <b>-0.15</b> | 0.83045 |
| STM0887 | artJ    | arginine transport system component          | <b>0.21</b>  | 0.69797 |
| STM0888 | artM    | arginine transport system component          | <b>-0.08</b> | 0.86208 |
| STM0888 | artM    | arginine transport system component          | <b>0.05</b>  | 0.91919 |
| STM0889 | artQ    | arginine transport system component          | <b>0.17</b>  | 0.68094 |
| STM0889 | artQ    | arginine transport system component          | <b>0.21</b>  | 0.60174 |
| STM0890 | artI    | arginine transport system                    | <b>0.11</b>  | 0.78992 |
| STM0890 | artI    | arginine transport system                    | <b>0.07</b>  | 0.87304 |
| STM0891 | artP    | arginine transport system                    | <b>-0.26</b> | 0.53497 |
| STM0891 | artP    | arginine transport system                    | <b>0.45</b>  | 0.26910 |
| STM0892 | ybjP    | putative lipoprotein                         | <b>-0.14</b> | 0.81437 |
| STM0892 | ybjP    | putative lipoprotein                         | <b>0.28</b>  | 0.53399 |
| STM0893 | STM0893 | putative integrase                           | <b>0.02</b>  | 0.97720 |
| STM0893 | STM0893 | putative integrase                           | <b>0.05</b>  | 0.90071 |
| STM0898 | STM0898 | putative transcriptional regulator           | <b>-0.32</b> | 0.45973 |
| STM0898 | STM0898 | putative transcriptional regulator           | <b>0.17</b>  | 0.66175 |
| STM0906 | STM0906 | hypothetical protein STM0906 [Phage Fels-1]  | <b>-0.38</b> | 0.51003 |
| STM0906 | STM0906 | hypothetical protein STM0906 [Phage Fels-1]  | <b>-0.32</b> | 0.46629 |
| STM0907 | STM0907 | putative chitinase [Phage Fels-1]            | <b>-0.77</b> | 0.31146 |

|         |         |                                                      |              |         |
|---------|---------|------------------------------------------------------|--------------|---------|
| STM0907 | STM0907 | putative chitinase [Phage Fels-1]                    | <b>0.00</b>  | 0.99540 |
| STM0908 | STM0908 | hypothetical protein STM0908 [Phage Fels-1]          | <b>-0.17</b> | 0.89742 |
| STM0908 | STM0908 | hypothetical protein STM0908 [Phage Fels-1]          | <b>-0.06</b> | 0.87999 |
| STM0930 | orfB    | hypothetical protein STM0930                         | <b>-0.43</b> | 0.32481 |
| STM0930 | orfB    | hypothetical protein STM0930                         | <b>0.24</b>  | 0.55397 |
| STM0931 | ybjR    | putative aminidase                                   | <b>-0.26</b> | 0.73542 |
| STM0931 | ybjR    | putative aminidase                                   | <b>0.11</b>  | 0.79592 |
| STM0932 | STM0932 | putative nucleoside-diphosphate-sugar epimerase      | <b>-0.29</b> | 0.49336 |
| STM0932 | STM0932 | putative nucleoside-diphosphate-sugar epimerase      | <b>0.08</b>  | 0.87456 |
| STM0933 | ybjT    | putative nucleoside-diphosphate-sugar epimerase      | <b>-0.11</b> | 0.82367 |
| STM0933 | ybjT    | putative nucleoside-diphosphate-sugar epimerase      | <b>0.97</b>  | 0.21062 |
| STM0934 | ltaA    | L-allo-threonine aldolase                            | <b>-0.03</b> | 0.96001 |
| STM0934 | ltaA    | L-allo-threonine aldolase                            | <b>0.39</b>  | 0.41715 |
| STM0935 | poxB    | pyruvate dehydrogenase                               | <b>-0.20</b> | 0.78844 |
| STM0935 | poxB    | pyruvate dehydrogenase                               | <b>0.07</b>  | 0.87512 |
| STM0936 | hcr     | NADH oxidoreductase                                  | <b>-0.13</b> | 0.75376 |
| STM0936 | hcr     | NADH oxidoreductase                                  | <b>0.48</b>  | 0.43672 |
| STM0937 | hcp     | hydroxylamine reductase                              | <b>-0.23</b> | 0.65025 |
| STM0937 | hcp     | hydroxylamine reductase                              | <b>0.09</b>  | 0.87790 |
| STM0938 | ybjE    | putative inner membrane protein                      | <b>-0.53</b> | 0.37241 |
| STM0938 | ybjE    | putative inner membrane protein                      | <b>-0.40</b> | 0.51300 |
| STM0939 | ybjD    | hypothetical protein STM0939                         | <b>-2.36</b> | 0.00231 |
| STM0939 | ybjD    | hypothetical protein STM0939                         | <b>-2.34</b> | 0.00220 |
| STM0940 | ybjX    | VirK-like protein                                    | <b>-3.86</b> | 0.00220 |
| STM0940 | ybjX    | VirK-like protein                                    | <b>-3.50</b> | 0.00184 |
| STM0941 | ybjY    | hypothetical protein STM0941                         | <b>-0.89</b> | 0.08384 |
| STM0941 | ybjY    | hypothetical protein STM0941                         | <b>-0.43</b> | 0.32295 |
| STM0942 | ybjZ    | putative transport protein                           | <b>-0.32</b> | 0.51182 |
| STM0942 | ybjZ    | putative transport protein                           | <b>0.21</b>  | 0.63493 |
| STM0943 | cspD    | stress response protein                              | <b>-0.57</b> | 0.27004 |
| STM0943 | cspD    | stress response protein                              | <b>0.44</b>  | 0.46469 |
| STM0944 | clpS    | ATP-dependent Clp protease adaptor protein ClpS      | <b>-0.13</b> | 0.74779 |
| STM0944 | clpS    | ATP-dependent Clp protease adaptor protein ClpS      | <b>0.67</b>  | 0.26820 |
| STM0945 | clpA    | ATP-binding subunit of serine protease               | <b>-0.46</b> | 0.30956 |
| STM0945 | clpA    | ATP-binding subunit of serine protease               | <b>0.13</b>  | 0.78657 |
| STM0947 | STM0947 | putative integrase                                   | <b>-0.19</b> | 0.80335 |
| STM0947 | STM0947 | putative integrase                                   | <b>0.00</b>  | 0.99540 |
| STM0948 | STM0948 | putative cytoplasmic protein                         | <b>-0.81</b> | 0.19909 |
| STM0948 | STM0948 | putative cytoplasmic protein                         | <b>0.85</b>  | 0.19874 |
| STM0950 | STM0950 | SlsA                                                 | <b>0.05</b>  | 0.94617 |
| STM0950 | STM0950 | SlsA                                                 | <b>0.36</b>  | 0.36243 |
| STM0951 | STM0951 | putative cytoplasmic protein                         | <b>-0.36</b> | 0.54341 |
| STM0951 | STM0951 | putative cytoplasmic protein                         | <b>-0.17</b> | 0.72554 |
| STM0952 | STM0952 | putative transcriptional regulator                   | <b>-0.19</b> | 0.69805 |
| STM0952 | STM0952 | putative transcriptional regulator                   | <b>0.00</b>  | 0.99449 |
| STM0953 | infA    | translation initiation factor IF-1                   | <b>-0.06</b> | 0.91170 |
| STM0953 | infA    | translation initiation factor IF-1                   | <b>0.20</b>  | 0.67788 |
| STM0955 | aat     | leucyl/phenylalanyl-tRNA--protein transferase        | <b>-0.14</b> | 0.71937 |
| STM0955 | aat     | leucyl/phenylalanyl-tRNA--protein transferase        | <b>0.01</b>  | 0.99184 |
| STM0956 | cydC    | cytochrome-related transporter                       | <b>-0.08</b> | 0.86947 |
| STM0956 | cydC    | cytochrome-related transporter                       | <b>0.14</b>  | 0.70629 |
| STM0957 | cydD    | cytochrome-related transporter                       | <b>0.06</b>  | 0.87126 |
| STM0957 | cydD    | cytochrome-related transporter                       | <b>-0.03</b> | 0.96568 |
| STM0958 | trxB    | thioredoxin reductase                                | <b>-0.88</b> | 0.17139 |
| STM0958 | trxB    | thioredoxin reductase                                | <b>-0.58</b> | 0.30605 |
| STM0959 | lrp     | leucine-responsive regulatory protein                | <b>-0.12</b> | 0.79185 |
| STM0959 | lrp     | leucine-responsive regulatory protein                | <b>0.79</b>  | 0.15859 |
| STM0960 | ftsK    | cell division protein                                | <b>0.52</b>  | 0.19909 |
| STM0960 | ftsK    | cell division protein                                | <b>0.50</b>  | 0.37154 |
| STM0961 | lolA    | outer-membrane lipoprotein carrier protein precursor | <b>-0.11</b> | 0.79761 |
| STM0961 | lolA    | outer-membrane lipoprotein carrier protein precursor | <b>0.18</b>  | 0.62552 |
| STM0962 | ycaJ    | hypothetical protein STM0962                         | <b>-0.08</b> | 0.84120 |
| STM0962 | ycaJ    | hypothetical protein STM0962                         | <b>0.39</b>  | 0.32481 |

|         |         |                                                  |              |         |
|---------|---------|--------------------------------------------------|--------------|---------|
| STM0963 | serS    | seryl-tRNA synthetase                            | <b>-0.08</b> | 0.82637 |
| STM0963 | serS    | seryl-tRNA synthetase                            | <b>0.00</b>  | 0.99856 |
| STM0964 | dmsA    | anaerobic dimethyl sulfoxide reductase subunit A | <b>0.01</b>  | 0.99726 |
| STM0964 | dmsA    | anaerobic dimethyl sulfoxide reductase subunit A | <b>0.28</b>  | 0.72143 |
| STM0965 | dmsB    | anaerobic dimethyl sulfoxide reductase subunit B | <b>-0.09</b> | 0.95574 |
| STM0965 | dmsB    | anaerobic dimethyl sulfoxide reductase subunit B | <b>0.06</b>  | 0.91378 |
| STM0966 | dmsC    | anaerobic dimethyl sulfoxide reductase subunit C | <b>0.13</b>  | 0.78176 |
| STM0966 | dmsC    | anaerobic dimethyl sulfoxide reductase subunit C | <b>0.55</b>  | 0.39025 |
| STM0968 | ycaD    | putative MFS family transporter protein          | <b>0.05</b>  | 0.94004 |
| STM0968 | ycaD    | putative MFS family transporter protein          | <b>0.36</b>  | 0.36311 |
| STM0969 | ycaM    | putative amino-acid transporter                  | <b>-0.58</b> | 0.23398 |
| STM0969 | ycaM    | putative amino-acid transporter                  | <b>-0.37</b> | 0.63482 |
| STM0970 | pflA    | pyruvate formate lyase-activating enzyme 1       | <b>-1.06</b> | 0.08580 |
| STM0970 | pflA    | pyruvate formate lyase-activating enzyme 1       | <b>-0.42</b> | 0.27005 |
| STM0972 | STM0972 | SopD-like protein                                | <b>-0.13</b> | 0.75739 |
| STM0972 | STM0972 | SopD-like protein                                | <b>-0.17</b> | 0.63006 |
| STM0973 | pflB    | pyruvate formate lyase I                         | <b>-0.02</b> | 0.96595 |
| STM0973 | pflB    | pyruvate formate lyase I                         | <b>-0.17</b> | 0.77639 |
| STM0974 | focA    | putative formate transporter                     | <b>-0.13</b> | 0.74455 |
| STM0974 | focA    | putative formate transporter                     | <b>0.06</b>  | 0.89388 |
| STM0975 | ycaO    | putative cytoplasmic protein                     | <b>-0.31</b> | 0.36414 |
| STM0975 | ycaO    | putative cytoplasmic protein                     | <b>0.15</b>  | 0.69634 |
| STM0976 | ycaP    | putative inner membrane protein                  | <b>-0.23</b> | 0.56618 |
| STM0976 | ycaP    | putative inner membrane protein                  | <b>-2.00</b> | 0.53263 |
| STM0977 | serC    | phosphoserine aminotransferase                   | <b>0.13</b>  | 0.77637 |
| STM0977 | serC    | phosphoserine aminotransferase                   | <b>0.23</b>  | 0.62209 |
| STM0978 | aroA    | 3-phosphoshikimate 1-carboxyvinyltransferase     | <b>0.10</b>  | 0.81744 |
| STM0978 | aroA    | 3-phosphoshikimate 1-carboxyvinyltransferase     | <b>0.21</b>  | 0.59423 |
| STM0979 | ycaL    | putative Zn-dependent protease                   | <b>-0.03</b> | 0.96595 |
| STM0979 | ycaL    | putative Zn-dependent protease                   | <b>0.24</b>  | 0.58254 |
| STM0980 | cmk     | cytidylate kinase                                | <b>-0.04</b> | 0.93381 |
| STM0980 | cmk     | cytidylate kinase                                | <b>0.13</b>  | 0.77186 |
| STM0981 | rpsA    | 30S ribosomal protein S1                         | <b>-0.06</b> | 0.87917 |
| STM0981 | rpsA    | 30S ribosomal protein S1                         | <b>-0.01</b> | 0.99512 |
| STM0982 | himD    | integration host factor beta subunit             | <b>-0.11</b> | 0.76674 |
| STM0982 | himD    | integration host factor beta subunit             | <b>-0.24</b> | 0.53722 |
| STM0983 | ycaI    | putative recombination protein                   | <b>-0.01</b> | 0.98546 |
| STM0983 | ycaI    | putative recombination protein                   | <b>-0.02</b> | 0.96785 |
| STM0984 | msbA    | transport protein                                | <b>-0.17</b> | 0.65474 |
| STM0984 | msbA    | transport protein                                | <b>0.42</b>  | 0.30019 |
| STM0985 | lpxK    | tetraacyldisaccharide 4'-kinase                  | <b>-0.31</b> | 0.52804 |
| STM0985 | lpxK    | tetraacyldisaccharide 4'-kinase                  | <b>0.02</b>  | 0.97273 |
| STM0986 | ycaQ    | putative cytoplasmic protein                     | <b>-0.09</b> | 0.88937 |
| STM0986 | ycaQ    | putative cytoplasmic protein                     | <b>-0.15</b> | 0.71417 |
| STM0987 | ycaR    | putative inner membrane protein                  | <b>0.04</b>  | 0.92506 |
| STM0987 | ycaR    | putative inner membrane protein                  | <b>0.16</b>  | 0.70077 |
| STM0988 | kdsB    | 3-deoxy-manno-octulosonate cytidyltransferase    | <b>-0.04</b> | 0.94990 |
| STM0988 | kdsB    | 3-deoxy-manno-octulosonate cytidyltransferase    | <b>-0.09</b> | 0.83223 |
| STM0989 | STM0989 | hypothetical protein STM0989                     | <b>0.01</b>  | 0.98640 |
| STM0989 | STM0989 | hypothetical protein STM0989                     | <b>-0.68</b> | 0.65814 |
| STM0990 | ybcC    | putative KicA-like protein                       | <b>-0.42</b> | 0.34574 |
| STM0990 | ybcC    | putative KicA-like protein                       | <b>0.51</b>  | 0.46026 |
| STM0991 | smtA    | S-adenosylmethionine-dependent methyltransferase | <b>-0.23</b> | 0.55892 |
| STM0991 | smtA    | S-adenosylmethionine-dependent methyltransferase | <b>0.55</b>  | 0.22421 |
| STM0992 | mukF    | condesin subunit F                               | <b>-0.10</b> | 0.80754 |
| STM0992 | mukF    | condesin subunit F                               | <b>0.24</b>  | 0.56860 |
| STM0993 | mukE    | condesin subunit E                               | <b>-0.28</b> | 0.46629 |
| STM0993 | mukE    | condesin subunit E                               | <b>0.22</b>  | 0.53840 |
| STM0994 | mukB    | condesin subunit B                               | <b>-0.07</b> | 0.85592 |
| STM0994 | mukB    | condesin subunit B                               | <b>0.05</b>  | 0.93506 |
| STM0995 | ycbB    | putative periplasmic protein                     | <b>-0.03</b> | 0.94050 |
| STM0995 | ycbB    | putative periplasmic protein                     | <b>0.38</b>  | 0.36017 |
| STM0996 | ycbK    | putative outer membrane protein                  | <b>-0.24</b> | 0.49035 |

|            |            |                                                            |              |         |
|------------|------------|------------------------------------------------------------|--------------|---------|
| STM0996    | ycbK       | putative outer membrane protein                            | <b>-0.05</b> | 0.91047 |
| STM0997    | ycbL       | putative metallo-beta-lactamase                            | <b>-0.41</b> | 0.32549 |
| STM0997    | ycbL       | putative metallo-beta-lactamase                            | <b>-0.14</b> | 0.72330 |
| STM0998    | aspC       | aspartate aminotransferase                                 | <b>-0.19</b> | 0.63514 |
| STM0998    | aspC       | aspartate aminotransferase                                 | <b>-0.03</b> | 0.96739 |
| STM0999    | ompF       | outer membrane protein F precursor                         | <b>0.07</b>  | 0.88548 |
| STM0999    | ompF       | outer membrane protein F precursor                         | <b>0.47</b>  | 0.32187 |
| STM1000    | asnS       | asparaginyl-tRNA synthetase                                | <b>-0.18</b> | 0.62860 |
| STM1000    | asnS       | asparaginyl-tRNA synthetase                                | <b>-0.04</b> | 0.94060 |
| STM1001    | STM1001    | putative leucine response regulator                        | <b>-0.16</b> | 0.68240 |
| STM1001    | STM1001    | putative leucine response regulator                        | <b>-0.15</b> | 0.72040 |
| STM1002    | STM1002    | diaminopropionate ammonia-lyase                            | <b>-0.29</b> | 0.43848 |
| STM1002    | STM1002    | diaminopropionate ammonia-lyase                            | <b>-0.42</b> | 0.51973 |
| STM1003    | STM1003    | putative transcriptional regulator                         | <b>-0.34</b> | 0.42761 |
| STM1003    | STM1003    | putative transcriptional regulator                         | <b>-0.02</b> | 0.97837 |
| STM1004    | pncB       | nicotinate phosphoribosyltransferase                       | <b>-0.13</b> | 0.81667 |
| STM1004    | pncB       | nicotinate phosphoribosyltransferase                       | <b>-0.02</b> | 0.96851 |
| STM1005    | STM1005    | integrase                                                  | <b>-0.35</b> | 0.52364 |
| STM1005    | STM1005    | integrase                                                  | <b>-0.05</b> | 0.92418 |
| STM1006    | STM1006    | excisionase                                                | <b>-0.59</b> | 0.32984 |
| STM1006    | STM1006    | excisionase                                                | <b>0.24</b>  | 0.48126 |
| STM1008,S  | STM1008,S  | hypothetical protein STM1008,S                             | <b>-0.42</b> | 0.36311 |
| STM1008,S  | STM1008,S  | hypothetical protein STM1008,S                             | <b>-0.51</b> | 0.80335 |
| STM1008,S  | STM1008,S  | hypothetical protein STM1008,S                             | <b>0.28</b>  | 0.45425 |
| STM1008,S  | STM1008,S  | hypothetical protein STM1008,S                             | <b>0.65</b>  | 0.42243 |
| STM1010,1n | STM1010,1n | hypothetical protein STM1010,1n                            | <b>-0.64</b> | 0.31059 |
| STM1010,1n | STM1010,1n | hypothetical protein STM1010,1n                            | <b>0.45</b>  | 0.33167 |
| STM1020    | STM1020    | hypothetical protein STM1020 [Phage Gifsy-2]               | <b>-0.23</b> | 0.79081 |
| STM1020    | STM1020    | hypothetical protein STM1020 [Phage Gifsy-2]               | <b>0.46</b>  | 0.40227 |
| STM1020    | STM1020    | hypothetical protein STM1020 [Phage Gifsy-2]               | <b>-0.15</b> | 0.69398 |
| STM1020    | STM1020    | hypothetical protein STM1020 [Phage Gifsy-2]               | <b>0.76</b>  | 0.39571 |
| STM1021    | STM1021    | hypothetical protein STM1021 [Phage Gifsy-2]               | <b>-0.15</b> | 0.80395 |
| STM1021    | STM1021    | hypothetical protein STM1021 [Phage Gifsy-2]               | <b>0.43</b>  | 0.32016 |
| STM1022    | STM1022    | putative molecular chaperone [Phage Gifsy-2]               | <b>-0.66</b> | 0.18622 |
| STM1022    | STM1022    | putative molecular chaperone [Phage Gifsy-2]               | <b>0.14</b>  | 0.89336 |
| STM1028    | STM1028    | lysozyme [Phage Gifsy-2]                                   | <b>-0.59</b> | 0.17211 |
| STM1028    | STM1028    | lysozyme [Phage Gifsy-2]                                   | <b>0.31</b>  | 0.62917 |
| STM1029    | STM1029    | hypothetical protein STM1029 [Phage Gifsy-2]               | <b>0.20</b>  | 0.65451 |
| STM1029    | STM1029    | hypothetical protein STM1029 [Phage Gifsy-2]               | <b>1.20</b>  | 0.11913 |
| STM1030    | STM1030    | hypothetical protein STM1030 [Phage Gifsy-2]               | <b>-0.31</b> | 0.54925 |
| STM1030    | STM1030    | hypothetical protein STM1030 [Phage Gifsy-2]               | <b>0.37</b>  | 0.41391 |
| STM1031    | STM1031    | hypothetical protein STM1031 [Phage Gifsy-2]               | <b>-0.47</b> | 0.39721 |
| STM1031    | STM1031    | hypothetical protein STM1031 [Phage Gifsy-2]               | <b>1.09</b>  | 0.47270 |
| STM1032    | STM1032    | hypothetical protein STM1032 [Phage Gifsy-2]               | <b>-0.13</b> | 0.94474 |
| STM1032    | STM1032    | hypothetical protein STM1032 [Phage Gifsy-2]               | <b>1.52</b>  | 0.38641 |
| STM1033    | STM1033    | Clp protease-like protein [Phage Gifsy-2]                  | <b>-0.65</b> | 0.39552 |
| STM1033    | STM1033    | Clp protease-like protein [Phage Gifsy-2]                  | <b>-0.24</b> | 0.63118 |
| STM1034    | STM1034    | putative RecA/RadA recombinase [Phage Gifsy-2]             | <b>-0.72</b> | 0.27621 |
| STM1034    | STM1034    | putative RecA/RadA recombinase [Phage Gifsy-2]             | <b>0.21</b>  | 0.60499 |
| STM1035    | STM1035    | ATP-binding sugar transporter-like protein [Phage Gifsy-2] | <b>-0.54</b> | 0.23114 |
| STM1035    | STM1035    | ATP-binding sugar transporter-like protein [Phage Gifsy-2] | <b>-0.27</b> | 0.65383 |
| STM1036    | STM1036    | probable minor tail protein [Phage Gifsy-2]                | <b>-0.06</b> | 0.89979 |
| STM1036    | STM1036    | probable minor tail protein [Phage Gifsy-2]                | <b>-0.33</b> | 0.63148 |
| STM1037    | STM1037    | probable minor tail protein [Phage Gifsy-2]                | <b>0.00</b>  | 0.99822 |
| STM1037    | STM1037    | probable minor tail protein [Phage Gifsy-2]                | <b>1.02</b>  | 0.21855 |
| STM1038    | STM1038    | probable major tail protein [Phage Gifsy-2]                | <b>0.60</b>  | 0.65526 |
| STM1038    | STM1038    | probable major tail protein [Phage Gifsy-2]                | <b>1.13</b>  | 0.30019 |
| STM1039    | STM1039    | probable minor tail protein [Phage Gifsy-2]                | <b>-0.86</b> | 0.25785 |
| STM1039    | STM1039    | probable minor tail protein [Phage Gifsy-2]                | <b>-0.40</b> | 0.65196 |
| STM1040    | STM1040    | probable minor tail protein [Phage Gifsy-2]                | <b>-0.35</b> | 0.55482 |
| STM1040    | STM1040    | probable minor tail protein [Phage Gifsy-2]                | <b>0.35</b>  | 0.47838 |

|         |         |                                                   |              |         |
|---------|---------|---------------------------------------------------|--------------|---------|
| STM1041 | STM1041 | probable minor tail protein [Phage Gifsy-2]       | <b>0.21</b>  | 0.88541 |
| STM1041 | STM1041 | probable minor tail protein [Phage Gifsy-2]       | <b>0.34</b>  | 0.61183 |
| STM1042 | STM1042 | probable minor tail protein [Phage Gifsy-2]       | <b>-0.41</b> | 0.46629 |
| STM1042 | STM1042 | probable minor tail protein [Phage Gifsy-2]       | <b>-0.20</b> | 0.74087 |
| STM1043 | STM1043 | attachment/invasion protein [Phage Gifsy-2]       | <b>-0.47</b> | 0.38200 |
| STM1043 | STM1043 | attachment/invasion protein [Phage Gifsy-2]       | <b>0.30</b>  | 0.46199 |
| STM1044 | sodC    | superoxide dismutase precursor                    | <b>-0.65</b> | 0.20432 |
| STM1044 | sodC    | superoxide dismutase precursor                    | <b>0.06</b>  | 0.91484 |
| STM1045 | STM1045 | probable minor tail protein [Phage Gifsy-2]       | <b>0.45</b>  | 0.60240 |
| STM1045 | STM1045 | probable minor tail protein [Phage Gifsy-2]       | <b>1.37</b>  | 0.19967 |
| STM1046 | STM1046 | probable tail assembly protein [Phage Gifsy-2]    | <b>-0.63</b> | 0.21360 |
| STM1046 | STM1046 | probable tail assembly protein [Phage Gifsy-2]    | <b>-0.03</b> | 0.96785 |
| STM1047 | STM1047 | probable tail assembly protein [Phage Gifsy-2]    | <b>0.33</b>  | 0.52334 |
| STM1047 | STM1047 | probable tail assembly protein [Phage Gifsy-2]    | <b>1.54</b>  | 0.17144 |
| STM1048 | STM1048 | host specificity protein J [Phage Gifsy-2]        | <b>0.21</b>  | 0.69776 |
| STM1048 | STM1048 | host specificity protein J [Phage Gifsy-2]        | <b>0.83</b>  | 0.48814 |
| STM1049 | STM1049 | probable tail fiber protein [Phage Gifsy-2]       | <b>-0.29</b> | 0.59052 |
| STM1049 | STM1049 | probable tail fiber protein [Phage Gifsy-2]       | <b>0.54</b>  | 0.20916 |
| STM1050 | STM1050 | tail fiber assembly like-protein [Phage Gifsy-2]  | <b>-0.42</b> | 0.38103 |
| STM1050 | STM1050 | tail fiber assembly like-protein [Phage Gifsy-2]  | <b>-0.09</b> | 0.93362 |
| STM1051 | ssel    | secreted effector protein [Phage Gifsy-2]         | <b>0.09</b>  | 0.94421 |
| STM1051 | ssel    | secreted effector protein [Phage Gifsy-2]         | <b>0.55</b>  | 0.32016 |
| STM1053 | STM1053 | hypothetical protein STM1053                      | <b>-0.06</b> | 0.89529 |
| STM1053 | STM1053 | hypothetical protein STM1053                      | <b>1.06</b>  | 0.23879 |
| STM1055 | STM1055 | hypothetical protein STM1055                      | <b>0.22</b>  | 0.61833 |
| STM1055 | STM1055 | hypothetical protein STM1055                      | <b>0.50</b>  | 0.23958 |
| STM1056 | STM1056 | MsgA-like protein                                 | <b>-0.83</b> | 0.21318 |
| STM1056 | STM1056 | MsgA-like protein                                 | <b>-0.26</b> | 0.68978 |
| STM1057 | pepN    | aminopeptidase N                                  | <b>0.09</b>  | 0.86385 |
| STM1057 | pepN    | aminopeptidase N                                  | <b>0.33</b>  | 0.60844 |
| STM1058 | pyrD    | dihydroorotate dehydrogenase                      | <b>-0.06</b> | 0.90277 |
| STM1058 | pyrD    | dihydroorotate dehydrogenase                      | <b>0.20</b>  | 0.61732 |
| STM1059 | ycbW    | putative cytoplasmic protein                      | <b>-0.43</b> | 0.32812 |
| STM1059 | ycbW    | putative cytoplasmic protein                      | <b>0.04</b>  | 0.96968 |
| STM1060 | STM1060 | putative iron-sulfur protein                      | <b>-0.44</b> | 0.35245 |
| STM1060 | STM1060 | putative iron-sulfur protein                      | <b>0.31</b>  | 0.54747 |
| STM1061 | ycbY    | putative N6-adenine-specific DNA methylase        | <b>0.02</b>  | 0.97580 |
| STM1061 | ycbY    | putative N6-adenine-specific DNA methylase        | <b>0.19</b>  | 0.71104 |
| STM1062 | uup     | putative ABC transporter ATPase component         | <b>-0.28</b> | 0.46266 |
| STM1062 | uup     | putative ABC transporter ATPase component         | <b>0.34</b>  | 0.42591 |
| STM1063 | pqiA    | paraquat-inducible protein A                      | <b>-0.18</b> | 0.68545 |
| STM1063 | pqiA    | paraquat-inducible protein A                      | <b>0.13</b>  | 0.76571 |
| STM1064 | pqiB    | paraquat-inducible protein B                      | <b>-0.36</b> | 0.35816 |
| STM1064 | pqiB    | paraquat-inducible protein B                      | <b>0.17</b>  | 0.75338 |
| STM1065 | ymbA    | putative outer membrane protein                   | <b>-0.49</b> | 0.25125 |
| STM1065 | ymbA    | putative outer membrane protein                   | <b>-0.19</b> | 0.72951 |
| STM1067 | fabA    | 3-hydroxydecanoyl-ACP dehydratase                 | <b>-0.03</b> | 0.95497 |
| STM1067 | fabA    | 3-hydroxydecanoyl-ACP dehydratase                 | <b>0.27</b>  | 0.47366 |
| STM1068 | lonH    | putative protease                                 | <b>-0.07</b> | 0.89004 |
| STM1068 | lonH    | putative protease                                 | <b>0.08</b>  | 0.87999 |
| STM1069 | ycbG    | hypothetical protein STM1069                      | <b>-0.62</b> | 0.17611 |
| STM1069 | ycbG    | hypothetical protein STM1069                      | <b>-0.17</b> | 0.71931 |
| STM1070 | ompA    | putative hydrogenase membrane component precurosr | <b>-0.19</b> | 0.68830 |
| STM1070 | ompA    | putative hydrogenase membrane component precurosr | <b>-0.13</b> | 0.73129 |
| STM1070 | ompA    | putative hydrogenase membrane component precurosr | <b>0.07</b>  | 0.86580 |
| STM1070 | ompA    | putative hydrogenase membrane component precurosr | <b>-0.13</b> | 0.72805 |
| STM1070 | ompA    | putative hydrogenase membrane component precurosr | <b>-0.15</b> | 0.68599 |
| STM1070 | ompA    | putative hydrogenase membrane component precurosr | <b>0.03</b>  | 0.94472 |
| STM1070 | ompA    | putative hydrogenase membrane component precurosr | <b>-0.05</b> | 0.91047 |
| STM1070 | ompA    | putative hydrogenase membrane component precurosr | <b>-0.10</b> | 0.81667 |
| STM1070 | ompA    | putative hydrogenase membrane component precurosr | <b>-0.13</b> | 0.74820 |
| STM1070 | ompA    | putative hydrogenase membrane component precurosr | <b>0.02</b>  | 0.96797 |
| STM1070 | ompA    | putative hydrogenase membrane component precurosr | <b>0.03</b>  | 0.94360 |

|         |         |                                                   |              |         |
|---------|---------|---------------------------------------------------|--------------|---------|
| STM1070 | ompA    | putative hydrogenase membrane component precurosr | <b>0.70</b>  | 0.61843 |
| STM1070 | ompA    | putative hydrogenase membrane component precurosr | <b>-0.07</b> | 0.84956 |
| STM1070 | ompA    | putative hydrogenase membrane component precurosr | <b>0.03</b>  | 0.94143 |
| STM1070 | ompA    | putative hydrogenase membrane component precurosr | <b>-0.16</b> | 0.68444 |
| STM1070 | ompA    | putative hydrogenase membrane component precurosr | <b>-0.16</b> | 0.65383 |
| STM1070 | ompA    | putative hydrogenase membrane component precurosr | <b>-0.15</b> | 0.72120 |
| STM1070 | ompA    | putative hydrogenase membrane component precurosr | <b>0.10</b>  | 0.85887 |
| STM1070 | ompA    | putative hydrogenase membrane component precurosr | <b>0.05</b>  | 0.93767 |
| STM1070 | ompA    | putative hydrogenase membrane component precurosr | <b>0.12</b>  | 0.82117 |
| STM1070 | ompA    | putative hydrogenase membrane component precurosr | <b>-0.08</b> | 0.85626 |
| STM1070 | ompA    | putative hydrogenase membrane component precurosr | <b>-0.06</b> | 0.88934 |
| STM1070 | ompA    | putative hydrogenase membrane component precurosr | <b>0.26</b>  | 0.57827 |
| STM1070 | ompA    | putative hydrogenase membrane component precurosr | <b>0.09</b>  | 0.85053 |
| STM1070 | ompA    | putative hydrogenase membrane component precurosr | <b>0.00</b>  | 0.99800 |
| STM1070 | ompA    | putative hydrogenase membrane component precurosr | <b>0.15</b>  | 0.67264 |
| STM1070 | ompA    | putative hydrogenase membrane component precurosr | <b>0.40</b>  | 0.38260 |
| STM1070 | ompA    | putative hydrogenase membrane component precurosr | <b>0.06</b>  | 0.89624 |
| STM1070 | ompA    | putative hydrogenase membrane component precurosr | <b>0.07</b>  | 0.86861 |
| STM1070 | ompA    | putative hydrogenase membrane component precurosr | <b>0.08</b>  | 0.84456 |
| STM1070 | ompA    | putative hydrogenase membrane component precurosr | <b>0.20</b>  | 0.71661 |
| STM1070 | ompA    | putative hydrogenase membrane component precurosr | <b>0.03</b>  | 0.95747 |
| STM1070 | ompA    | putative hydrogenase membrane component precurosr | <b>-0.12</b> | 0.77427 |
| STM1070 | ompA    | putative hydrogenase membrane component precurosr | <b>0.22</b>  | 0.54624 |
| STM1071 | sulA    | cell division inhibitor                           | <b>-0.05</b> | 0.91170 |
| STM1071 | sulA    | cell division inhibitor                           | <b>0.18</b>  | 0.67662 |
| STM1074 | yccF    | putative inner membrane protein                   | <b>-0.24</b> | 0.54996 |
| STM1074 | yccF    | putative inner membrane protein                   | <b>0.22</b>  | 0.67137 |
| STM1075 | helD    | DNA helicase IV                                   | <b>-0.23</b> | 0.82571 |
| STM1075 | helD    | DNA helicase IV                                   | <b>0.23</b>  | 0.65301 |
| STM1076 | mgsA    | methylglyoxal synthase                            | <b>-0.07</b> | 0.90534 |
| STM1076 | mgsA    | methylglyoxal synthase                            | <b>0.25</b>  | 0.62134 |
| STM1077 | yccT    | hypothetical protein STM1077                      | <b>-0.59</b> | 0.17611 |
| STM1077 | yccT    | hypothetical protein STM1077                      | <b>0.26</b>  | 0.67892 |
| STM1078 | STM1078 | putative cytoplasmic protein                      | <b>-0.87</b> | 0.12854 |
| STM1078 | STM1078 | putative cytoplasmic protein                      | <b>-0.33</b> | 0.38236 |
| STM1079 | yccV    | putative inner membrane protein                   | <b>-0.42</b> | 0.30233 |
| STM1079 | yccV    | putative inner membrane protein                   | <b>-0.02</b> | 0.98094 |
| STM1080 | yccW    | putative SAM-dependent methyltransferase          | <b>-0.05</b> | 0.89625 |
| STM1080 | yccW    | putative SAM-dependent methyltransferase          | <b>0.01</b>  | 0.98094 |
| STM1081 | STM1081 | putative outer membrane protein                   | <b>-0.10</b> | 0.86828 |
| STM1081 | STM1081 | putative outer membrane protein                   | <b>0.49</b>  | 0.34241 |
| STM1082 | STM1082 | bacterial regulatory protein                      | <b>-0.20</b> | 0.71978 |
| STM1082 | STM1082 | bacterial regulatory protein                      | <b>0.48</b>  | 0.42497 |
| STM1083 | yccX    | putative phosphohydrolase                         | <b>-0.78</b> | 0.13813 |
| STM1083 | yccX    | putative phosphohydrolase                         | <b>-0.44</b> | 0.51973 |
| STM1084 | yccK    | putative sulfite reductase gamma subunit          | <b>-0.44</b> | 0.34812 |
| STM1084 | yccK    | putative sulfite reductase gamma subunit          | <b>0.62</b>  | 0.37154 |
| STM1085 | yccA    | putative transport protein                        | <b>0.11</b>  | 0.78257 |
| STM1085 | yccA    | putative transport protein                        | <b>0.18</b>  | 0.65916 |
| STM1086 | serT    | STM1086                                           | <b>-0.33</b> | 0.68642 |
| STM1086 | serT    | STM1086                                           | <b>-0.05</b> | 0.96386 |
| STM1087 | pipA    | pathogenicity island-encoded protein A            | <b>-0.39</b> | 0.32760 |
| STM1087 | pipA    | pathogenicity island-encoded protein A            | <b>0.14</b>  | 0.71917 |
| STM1088 | pipB    | secreted effector protein                         | <b>-0.64</b> | 0.31482 |
| STM1088 | pipB    | secreted effector protein                         | <b>0.52</b>  | 0.46892 |
| STM1090 | pipC    | pathogenicity island-encoded protein C            | <b>0.73</b>  | 0.17041 |
| STM1090 | pipC    | pathogenicity island-encoded protein C            | <b>1.33</b>  | 0.04872 |
| STM1091 | sopB    | secreted effector protein                         | <b>0.27</b>  | 0.76172 |
| STM1091 | sopB    | secreted effector protein                         | <b>1.27</b>  | 0.18157 |
| STM1094 | pipD    | pathogenicity island-encoded protein D            | <b>-0.23</b> | 0.63901 |
| STM1094 | pipD    | pathogenicity island-encoded protein D            | <b>0.28</b>  | 0.65271 |
| STM1095 | copS    | copper resistance protein                         | <b>0.08</b>  | 0.90423 |
| STM1095 | copS    | copper resistance protein                         | <b>0.40</b>  | 0.42277 |

|         |         |                                             |              |         |
|---------|---------|---------------------------------------------|--------------|---------|
| STM1096 | copR    | copper resistance protein                   | <b>-0.60</b> | 0.15984 |
| STM1096 | copR    | copper resistance protein                   | <b>0.48</b>  | 0.43219 |
| STM1097 | STM1097 | hypothetical protein STM1097                | <b>0.02</b>  | 0.98123 |
| STM1097 | STM1097 | hypothetical protein STM1097                | <b>0.19</b>  | 0.65113 |
| STM1098 | hpaC    | 4-hydroxyphenylacetate catabolism           | <b>0.09</b>  | 0.88502 |
| STM1098 | hpaC    | 4-hydroxyphenylacetate catabolism           | <b>0.23</b>  | 0.68439 |
| STM1099 | hpaB    | 4-hydroxyphenylacetate catabolism           | <b>-0.24</b> | 0.65012 |
| STM1099 | hpaB    | 4-hydroxyphenylacetate catabolism           | <b>0.64</b>  | 0.38260 |
| STM1100 | hpaR    | 4-hydroxyphenylacetate catabolism           | <b>-0.28</b> | 0.48343 |
| STM1100 | hpaR    | 4-hydroxyphenylacetate catabolism           | <b>0.86</b>  | 0.34449 |
| STM1101 | hpaG    | 4-hydroxyphenylacetate catabolism           | <b>-0.45</b> | 0.34184 |
| STM1101 | hpaG    | 4-hydroxyphenylacetate catabolism           | <b>0.59</b>  | 0.34193 |
| STM1102 | hpaE    | 4-hydroxyphenylacetate catabolism           | <b>-0.26</b> | 0.76387 |
| STM1102 | hpaE    | 4-hydroxyphenylacetate catabolism           | <b>-1.05</b> | 0.45374 |
| STM1103 | hpaD    | 4-hydroxyphenylacetate catabolism           | <b>-0.19</b> | 0.85766 |
| STM1103 | hpaD    | 4-hydroxyphenylacetate catabolism           | <b>0.58</b>  | 0.23613 |
| STM1104 | hpaF    | 4-hydroxyphenylacetate catabolism           | <b>-0.33</b> | 0.65849 |
| STM1104 | hpaF    | 4-hydroxyphenylacetate catabolism           | <b>0.37</b>  | 0.63498 |
| STM1105 | hpaH    | 4-hydroxyphenylacetate catabolism           | <b>0.11</b>  | 0.80652 |
| STM1105 | hpaH    | 4-hydroxyphenylacetate catabolism           | <b>0.71</b>  | 0.40020 |
| STM1106 | hpaI    | 4-hydroxyphenylacetate catabolism           | <b>0.03</b>  | 0.98124 |
| STM1106 | hpaI    | 4-hydroxyphenylacetate catabolism           | <b>-0.02</b> | 0.98140 |
| STM1107 | hpaX    | 4-hydroxyphenylacetate catabolism           | <b>0.02</b>  | 0.97314 |
| STM1107 | hpaX    | 4-hydroxyphenylacetate catabolism           | <b>0.42</b>  | 0.34449 |
| STM1108 | hpaA    | 4-hydroxyphenylacetate catabolism           | <b>-0.05</b> | 0.94174 |
| STM1108 | hpaA    | 4-hydroxyphenylacetate catabolism           | <b>0.42</b>  | 0.55482 |
| STM1109 | STM1109 | putative periplasmic protein                | <b>-0.49</b> | 0.26213 |
| STM1109 | STM1109 | putative periplasmic protein                | <b>1.37</b>  | 0.13645 |
| STM1111 | yccD    | putative cytoplasmic protein                | <b>-0.63</b> | 0.19967 |
| STM1111 | yccD    | putative cytoplasmic protein                | <b>-0.09</b> | 0.88862 |
| STM1112 | cbpA    | DNA-binding protein                         | <b>-0.45</b> | 0.22621 |
| STM1112 | cbpA    | DNA-binding protein                         | <b>-0.26</b> | 0.54566 |
| STM1113 | scsA    | suppression of copper sensitivity protein A | <b>-0.23</b> | 0.58927 |
| STM1113 | scsA    | suppression of copper sensitivity protein A | <b>0.22</b>  | 0.75418 |
| STM1114 | scsB    | suppression of copper sensitivity protein   | <b>-0.17</b> | 0.80012 |
| STM1114 | scsB    | suppression of copper sensitivity protein   | <b>0.11</b>  | 0.90193 |
| STM1115 | scsC    | suppression of copper sensitivity protein   | <b>-0.28</b> | 0.64525 |
| STM1115 | scsC    | suppression of copper sensitivity protein   | <b>0.17</b>  | 0.75424 |
| STM1116 | scsD    | suppression of copper sensitivity protein   | <b>-0.31</b> | 0.59325 |
| STM1116 | scsD    | suppression of copper sensitivity protein   | <b>-0.32</b> | 0.53679 |
| STM1117 | agp     | glucose-1-phosphatase                       | <b>-0.33</b> | 0.58387 |
| STM1117 | agp     | glucose-1-phosphatase                       | <b>0.06</b>  | 0.91270 |
| STM1118 | yccJ    | putative cytoplasmic protein                | <b>-0.40</b> | 0.53006 |
| STM1118 | yccJ    | putative cytoplasmic protein                | <b>0.50</b>  | 0.38552 |
| STM1119 | wraB    | TrpR binding protein WrbA                   | <b>0.23</b>  | 0.60034 |
| STM1119 | wraB    | TrpR binding protein WrbA                   | <b>0.44</b>  | 0.60249 |
| STM1121 | ymdF    | putative cytoplasmic protein                | <b>-1.09</b> | 0.11913 |
| STM1121 | ymdF    | putative cytoplasmic protein                | <b>-0.13</b> | 0.79635 |
| STM1122 | ydcC    | putative transcriptional repressor          | <b>-0.24</b> | 0.49865 |
| STM1122 | ydcC    | putative transcriptional repressor          | <b>-0.13</b> | 0.77139 |
| STM1123 | STM1123 | putative periplasmic protein                | <b>0.87</b>  | 0.36942 |
| STM1123 | STM1123 | putative periplasmic protein                | <b>0.55</b>  | 0.70740 |
| STM1125 | putP    | major sodium/proline symporter              | <b>0.15</b>  | 0.76502 |
| STM1125 | putP    | major sodium/proline symporter              | <b>0.22</b>  | 0.57132 |
| STM1127 | STM1127 | putative transcriptional regulator          | <b>-0.56</b> | 0.20256 |
| STM1127 | STM1127 | putative transcriptional regulator          | <b>0.27</b>  | 0.62433 |
| STM1128 | STM1128 | putative sodium/glucose cotransporter       | <b>-0.28</b> | 0.58694 |
| STM1128 | STM1128 | putative sodium/glucose cotransporter       | <b>-0.18</b> | 0.65145 |
| STM1129 | STM1129 | putative inner membrane protein             | <b>-0.05</b> | 0.95476 |
| STM1129 | STM1129 | putative inner membrane protein             | <b>0.18</b>  | 0.79897 |
| STM1130 | STM1130 | putative inner membrane protein             | <b>-0.26</b> | 0.79308 |
| STM1130 | STM1130 | putative inner membrane protein             | <b>0.37</b>  | 0.76562 |
| STM1131 | STM1131 | putative outer membrane protein             | <b>-0.38</b> | 0.45082 |

|           |         |                                                 |              |         |
|-----------|---------|-------------------------------------------------|--------------|---------|
| STM1131   | STM1131 | putative outer membrane protein                 | <b>-0.15</b> | 0.85893 |
| STM1132   | STM1132 | putative sialic acid transporter                | <b>-0.19</b> | 0.63669 |
| STM1132   | STM1132 | putative sialic acid transporter                | <b>0.15</b>  | 0.79018 |
| STM1133   | STM1133 | putative dehydrogenase                          | <b>-0.02</b> | 0.97355 |
| STM1133   | STM1133 | putative dehydrogenase                          | <b>-0.46</b> | 0.37121 |
| STM1134   | serX    | STM1134                                         | <b>-0.37</b> | 0.39896 |
| STM1134   | serX    | STM1134                                         | <b>-0.15</b> | 0.78010 |
| STM1134   | serX    | STM1134                                         | <b>0.04</b>  | 0.94223 |
| STM1134   | serX    | STM1134                                         | <b>0.39</b>  | 0.48014 |
| STM1135   | ycdW    | putative oxidoreductase                         | <b>-0.17</b> | 0.70932 |
| STM1135   | ycdW    | putative oxidoreductase                         | <b>-0.13</b> | 0.80915 |
| STM1136   | ycdX    | hypothetical protein STM1136                    | <b>-0.03</b> | 0.95532 |
| STM1136   | ycdX    | hypothetical protein STM1136                    | <b>0.08</b>  | 0.84187 |
| STM1137   | ycdY    | putative oxidoreductase component               | <b>-0.29</b> | 0.48814 |
| STM1137   | ycdY    | putative oxidoreductase component               | <b>0.26</b>  | 0.47857 |
| STM1138   | ycdZ    | putative inner membrane protein                 | <b>-0.15</b> | 0.75002 |
| STM1138   | ycdZ    | putative inner membrane protein                 | <b>0.35</b>  | 0.42277 |
| STM1139   | csgG    | putative curli operon transcriptional regulator | <b>0.22</b>  | 0.57021 |
| STM1139   | csgG    | putative curli operon transcriptional regulator | <b>0.80</b>  | 0.14168 |
| STM1140   | csgF    | curli production assembly/transport component   | <b>-0.27</b> | 0.70686 |
| STM1140   | csgF    | curli production assembly/transport component   | <b>0.76</b>  | 0.14354 |
| STM1141   | csgE    | curli production assembly/transport component   | <b>-0.09</b> | 0.87223 |
| STM1141   | csgE    | curli production assembly/transport component   | <b>0.10</b>  | 0.89611 |
| STM1142   | csgD    | putative transcriptional regulator              | <b>-0.41</b> | 0.57021 |
| STM1142   | csgD    | putative transcriptional regulator              | <b>0.77</b>  | 0.23534 |
| STM1143   | csgB    | minor curlin subunit precursor                  | <b>-0.52</b> | 0.36635 |
| STM1143   | csgB    | minor curlin subunit precursor                  | <b>0.22</b>  | 0.87512 |
| STM1144   | csgA    | major curlin subunit precursor                  | <b>-0.80</b> | 0.19398 |
| STM1144   | csgA    | major curlin subunit precursor                  | <b>0.06</b>  | 0.91974 |
| STM1145   | csgC    | putative curli production protein precursor     | <b>0.05</b>  | 0.91170 |
| STM1145   | csgC    | putative curli production protein precursor     | <b>0.32</b>  | 0.56421 |
| STM1146   | ymdA    | putative periplasmic protein                    | <b>0.35</b>  | 0.46112 |
| STM1146   | ymdA    | putative periplasmic protein                    | <b>0.40</b>  | 0.47844 |
| STM1147   | STM1147 | hypothetical protein STM1147                    | <b>0.18</b>  | 0.86639 |
| STM1147   | STM1147 | hypothetical protein STM1147                    | <b>0.80</b>  | 0.43914 |
| STM1148,S | ymdC    | putative phospholipase                          | <b>0.27</b>  | 0.51952 |
| STM1148,S | ymdC    | putative phospholipase                          | <b>0.39</b>  | 0.39186 |
| STM1149   | mdoC    | glucans biosynthesis protein                    | <b>0.00</b>  | 0.99394 |
| STM1149   | mdoC    | glucans biosynthesis protein                    | <b>0.50</b>  | 0.22621 |
| STM1150   | mdoG    | periplasmic glucans biosynthesis protein        | <b>0.16</b>  | 0.79096 |
| STM1150   | mdoG    | periplasmic glucans biosynthesis protein        | <b>-0.06</b> | 0.94426 |
| STM1151   | mdoH    | glucosyltransferase MdoH                        | <b>-0.12</b> | 0.76970 |
| STM1151   | mdoH    | glucosyltransferase MdoH                        | <b>-0.20</b> | 0.68444 |
| STM1152   | yceK    | putative outer membrane lipoprotein             | <b>-0.10</b> | 0.83525 |
| STM1152   | yceK    | putative outer membrane lipoprotein             | <b>0.23</b>  | 0.56535 |
| STM1153   | msyB    | acidic protein                                  | <b>-1.19</b> | 0.07353 |
| STM1153   | msyB    | acidic protein                                  | <b>-0.23</b> | 0.76720 |
| STM1154   | yceE    | putative transport protein                      | <b>-0.15</b> | 0.72518 |
| STM1154   | yceE    | putative transport protein                      | <b>0.48</b>  | 0.42591 |
| STM1155   | htrB    | lipid A biosynthesis lauroyl acyltransferase    | <b>0.03</b>  | 0.95932 |
| STM1155   | htrB    | lipid A biosynthesis lauroyl acyltransferase    | <b>-0.11</b> | 0.81339 |
| STM1156   | yceA    | hypothetical protein STM1156                    | <b>-0.02</b> | 0.96774 |
| STM1156   | yceA    | hypothetical protein STM1156                    | <b>0.35</b>  | 0.45739 |
| STM1157   | yceI    | hypothetical protein STM1157                    | <b>-0.42</b> | 0.31367 |
| STM1157   | yceI    | hypothetical protein STM1157                    | <b>0.21</b>  | 0.61341 |
| STM1158   | STM1158 | putative inner membrane protein                 | <b>-0.28</b> | 0.47610 |
| STM1158   | STM1158 | putative inner membrane protein                 | <b>0.63</b>  | 0.29796 |
| STM1159   | yceO    | putative inner membrane protein                 | <b>-0.20</b> | 0.60249 |
| STM1159   | yceO    | putative inner membrane protein                 | <b>-0.26</b> | 0.65526 |
| STM1160   | solA    | putative sarcosine oxidase                      | <b>-0.08</b> | 0.89468 |
| STM1160   | solA    | putative sarcosine oxidase                      | <b>0.56</b>  | 0.35937 |
| STM1161,S | yceP    | putative cytoplasmic protein                    | <b>0.18</b>  | 0.82348 |
| STM1161,S | yceP    | putative cytoplasmic protein                    | <b>0.89</b>  | 0.26261 |

|         |         |                                                  |              |         |
|---------|---------|--------------------------------------------------|--------------|---------|
| STM1162 | dinI    | DNA damage-inducible protein I                   | <b>-0.19</b> | 0.70933 |
| STM1162 | dinI    | DNA damage-inducible protein I                   | <b>0.31</b>  | 0.47656 |
| STM1163 | pyrC    | dihydroorotase                                   | <b>0.14</b>  | 0.76970 |
| STM1163 | pyrC    | dihydroorotase                                   | <b>0.26</b>  | 0.52101 |
| STM1164 | yceB    | putative outer membrane lipoprotein              | <b>-0.26</b> | 0.70848 |
| STM1164 | yceB    | putative outer membrane lipoprotein              | <b>0.59</b>  | 0.38075 |
| STM1165 | grxB    | glutaredoxin 2                                   | <b>0.07</b>  | 0.90534 |
| STM1165 | grxB    | glutaredoxin 2                                   | <b>0.07</b>  | 0.88784 |
| STM1166 | yceL    | putative transport protein                       | <b>0.45</b>  | 0.34812 |
| STM1166 | yceL    | putative transport protein                       | <b>0.56</b>  | 0.30422 |
| STM1167 | rimJ    | acetylase                                        | <b>0.40</b>  | 0.34201 |
| STM1167 | rimJ    | acetylase                                        | <b>0.55</b>  | 0.19425 |
| STM1168 | yceH    | putative cytoplasmic protein                     | <b>-0.39</b> | 0.36636 |
| STM1168 | yceH    | putative cytoplasmic protein                     | <b>0.17</b>  | 0.70691 |
| STM1169 | mviM    | putative virulence protein                       | <b>0.33</b>  | 0.62403 |
| STM1169 | mviM    | putative virulence protein                       | <b>0.92</b>  | 0.27696 |
| STM1170 | mviN    | putative virulence protein                       | <b>0.09</b>  | 0.83305 |
| STM1170 | mviN    | putative virulence protein                       | <b>0.08</b>  | 0.85893 |
| STM1171 | flgN    | putative FlgK/FlgL export chaperone              | <b>0.17</b>  | 0.66888 |
| STM1171 | flgN    | putative FlgK/FlgL export chaperone              | <b>0.09</b>  | 0.83304 |
| STM1172 | flgM    | anti-FlhA factor                                 | <b>0.02</b>  | 0.97054 |
| STM1172 | flgM    | anti-FlhA factor                                 | <b>0.13</b>  | 0.85152 |
| STM1173 | flgA    | flagellar basal body P-ring biosynthesis protein | <b>0.20</b>  | 0.61234 |
| STM1173 | flgA    | flagellar basal body P-ring biosynthesis protein | <b>0.18</b>  | 0.60750 |
| STM1174 | flgB    | flagellar basal body rod protein                 | <b>0.01</b>  | 0.98124 |
| STM1174 | flgB    | flagellar basal body rod protein                 | <b>0.34</b>  | 0.54235 |
| STM1175 | flgC    | flagellar basal body rod protein                 | <b>-0.32</b> | 0.52101 |
| STM1175 | flgC    | flagellar basal body rod protein                 | <b>0.42</b>  | 0.35424 |
| STM1176 | flgD    | flagellar basal body rod modification protein    | <b>0.01</b>  | 0.98539 |
| STM1176 | flgD    | flagellar basal body rod modification protein    | <b>0.32</b>  | 0.58430 |
| STM1177 | flgE    | flagellar hook protein                           | <b>0.00</b>  | 0.99484 |
| STM1177 | flgE    | flagellar hook protein                           | <b>0.23</b>  | 0.56565 |
| STM1178 | flgF    | cell-proximal portion of basal-body rod          | <b>-0.26</b> | 0.70933 |
| STM1178 | flgF    | cell-proximal portion of basal-body rod          | <b>0.14</b>  | 0.72819 |
| STM1179 | flgG    | flagellar basal-body rod protein                 | <b>-0.29</b> | 0.45943 |
| STM1179 | flgG    | flagellar basal-body rod protein                 | <b>0.39</b>  | 0.42344 |
| STM1180 | flgH    | flagellar L-ring protein precursor               | <b>0.16</b>  | 0.79241 |
| STM1180 | flgH    | flagellar L-ring protein precursor               | <b>0.95</b>  | 0.13813 |
| STM1181 | flgI    | flagellar P-ring protein precursor               | <b>0.20</b>  | 0.60891 |
| STM1181 | flgI    | flagellar P-ring protein precursor               | <b>0.35</b>  | 0.42455 |
| STM1182 | flgJ    | flagellar biosynthesis protein                   | <b>-0.10</b> | 0.80574 |
| STM1182 | flgJ    | flagellar biosynthesis protein                   | <b>0.55</b>  | 0.17603 |
| STM1183 | flgK    | flagellar hook-associated protein                | <b>0.15</b>  | 0.74995 |
| STM1183 | flgK    | flagellar hook-associated protein                | <b>0.32</b>  | 0.35325 |
| STM1184 | flgL    | flagellar hook-associated protein                | <b>-0.09</b> | 0.85340 |
| STM1184 | flgL    | flagellar hook-associated protein                | <b>0.26</b>  | 0.54654 |
| STM1185 | rne     | RNase E                                          | <b>-0.41</b> | 0.34051 |
| STM1185 | rne     | RNase E                                          | <b>0.35</b>  | 0.39577 |
| STM1187 | rluC    | 23S rRNA pseudouridylate synthase                | <b>-0.02</b> | 0.97168 |
| STM1187 | rluC    | 23S rRNA pseudouridylate synthase                | <b>-0.14</b> | 0.72286 |
| STM1188 | STM1188 | putative inner membrane lipoprotein              | <b>-0.09</b> | 0.82696 |
| STM1188 | STM1188 | putative inner membrane lipoprotein              | <b>-0.13</b> | 0.74979 |
| STM1189 | maf     | Maf-like protein                                 | <b>-0.30</b> | 0.46266 |
| STM1189 | maf     | Maf-like protein                                 | <b>-0.04</b> | 0.94045 |
| STM1190 | yceD    | putative metal-binding protein                   | <b>-0.15</b> | 0.69882 |
| STM1190 | yceD    | putative metal-binding protein                   | <b>0.35</b>  | 0.43235 |
| STM1192 | plsX    | fatty acid/phospholipid synthesis protein        | <b>-0.09</b> | 0.87223 |
| STM1192 | plsX    | fatty acid/phospholipid synthesis protein        | <b>0.05</b>  | 0.92584 |
| STM1193 | fabH    | 3-oxoacyl-(acyl carrier protein) synthase        | <b>0.14</b>  | 0.76811 |
| STM1193 | fabH    | 3-oxoacyl-(acyl carrier protein) synthase        | <b>0.15</b>  | 0.72247 |
| STM1194 | fabD    | acyl carrier protein S-malonyltransferase        | <b>-0.19</b> | 0.74374 |
| STM1194 | fabD    | acyl carrier protein S-malonyltransferase        | <b>-0.18</b> | 0.64525 |
| STM1194 | fabD    | acyl carrier protein S-malonyltransferase        | <b>-0.18</b> | 0.79890 |

|           |      |                                                   |              |         |
|-----------|------|---------------------------------------------------|--------------|---------|
| STM1194   | fabD | acyl carrier protein S-malonyltransferase         | <b>-0.05</b> | 0.92120 |
| STM1195   | fabG | 3-ketoacyl-(acyl-carrier-protein) reductase       | <b>-0.04</b> | 0.96001 |
| STM1195   | fabG | 3-ketoacyl-(acyl-carrier-protein) reductase       | <b>0.19</b>  | 0.61335 |
| STM1196   | acpP | acyl carrier protein                              | <b>0.13</b>  | 0.74127 |
| STM1196   | acpP | acyl carrier protein                              | <b>0.53</b>  | 0.24707 |
| STM1197   | fabF | 3-oxoacyl-(acyl carrier protein) synthase         | <b>-0.32</b> | 0.53679 |
| STM1197   | fabF | 3-oxoacyl-(acyl carrier protein) synthase         | <b>-0.23</b> | 0.72647 |
| STM1198   | pabC | 4-amino-4-deoxychorismate lyase                   | <b>-0.21</b> | 0.59088 |
| STM1198   | pabC | 4-amino-4-deoxychorismate lyase                   | <b>0.08</b>  | 0.84854 |
| STM1199   | yceG | putative periplasmic solute-binding protein       | <b>-0.28</b> | 0.40749 |
| STM1199   | yceG | putative periplasmic solute-binding protein       | <b>0.59</b>  | 0.22602 |
| STM1200   | tmk  | thymidylate kinase                                | <b>-0.32</b> | 0.43439 |
| STM1200   | tmk  | thymidylate kinase                                | <b>-0.33</b> | 0.37880 |
| STM1201   | holB | DNA polymerase III subunit delta                  | <b>-0.13</b> | 0.75706 |
| STM1201   | holB | DNA polymerase III subunit delta                  | <b>-0.08</b> | 0.83191 |
| STM1202   | ycfH | putative metal-dependent hydrolase                | <b>-0.20</b> | 0.64401 |
| STM1202   | ycfH | putative metal-dependent hydrolase                | <b>0.16</b>  | 0.72143 |
| STM1203   | ptsG | glucose-specific IIBC component                   | <b>-0.06</b> | 0.89566 |
| STM1203   | ptsG | glucose-specific IIBC component                   | <b>0.11</b>  | 0.80539 |
| STM1204   | fhuE | outer membrane receptor protein precursor         | <b>0.14</b>  | 0.75403 |
| STM1204   | fhuE | outer membrane receptor protein precursor         | <b>0.14</b>  | 0.74436 |
| STM1205   | ycfF | putative protein kinase C inhibitor               | <b>0.41</b>  | 0.25845 |
| STM1205   | ycfF | putative protein kinase C inhibitor               | <b>0.50</b>  | 0.23114 |
| STM1206   | ycfL | putative outer membrane lipoprotein               | <b>-0.21</b> | 0.63840 |
| STM1206   | ycfL | putative outer membrane lipoprotein               | <b>0.05</b>  | 0.93420 |
| STM1207   | ycfM | putative outer membrane lipoprotein               | <b>-0.47</b> | 0.26971 |
| STM1207   | ycfM | putative outer membrane lipoprotein               | <b>0.07</b>  | 0.87016 |
| STM1208   | ycfN | putative cytoplasmic protein                      | <b>-0.12</b> | 0.79256 |
| STM1208   | ycfN | putative cytoplasmic protein                      | <b>0.04</b>  | 0.91937 |
| STM1209   | nagZ | beta-hexosaminidase                               | <b>-0.05</b> | 0.93748 |
| STM1209   | nagZ | beta-hexosaminidase                               | <b>0.05</b>  | 0.92188 |
| STM1210   | ycfP | hypothetical protein STM1210                      | <b>-0.10</b> | 0.82350 |
| STM1210   | ycfP | hypothetical protein STM1210                      | <b>-0.08</b> | 0.85887 |
| STM1211   | ndh  | respiratory NADH dehydrogenase 2                  | <b>0.01</b>  | 0.98958 |
| STM1211   | ndh  | respiratory NADH dehydrogenase 2                  | <b>0.32</b>  | 0.38641 |
| STM1212   | ycfJ | putative outer membrane lipoprotein               | <b>-0.17</b> | 0.80672 |
| STM1212   | ycfJ | putative outer membrane lipoprotein               | <b>0.01</b>  | 0.98640 |
| STM1213   | ycfQ | putative transcriptional repressor                | <b>-0.40</b> | 0.56790 |
| STM1213   | ycfQ | putative transcriptional repressor                | <b>0.28</b>  | 0.62082 |
| STM1214   | ycfR | putative outer membrane protein                   | <b>-0.74</b> | 0.19967 |
| STM1214   | ycfR | putative outer membrane protein                   | <b>-0.38</b> | 0.49712 |
| STM1215   | ycfS | putative periplasmic protein                      | <b>-0.48</b> | 0.28396 |
| STM1215   | ycfS | putative periplasmic protein                      | <b>0.01</b>  | 0.98958 |
| STM1216   | mfd  | transcription-repair coupling factor              | <b>-0.61</b> | 0.27312 |
| STM1216   | mfd  | transcription-repair coupling factor              | <b>-0.10</b> | 0.85174 |
| STM1217,S | ycfU | integral membrane protein                         | <b>0.02</b>  | 0.97660 |
| STM1217,S | ycfU | integral membrane protein                         | <b>0.09</b>  | 0.80406 |
| STM1218   | ycfV | ATP-binding protein                               | <b>-0.41</b> | 0.34824 |
| STM1218   | ycfV | ATP-binding protein                               | <b>-0.03</b> | 0.96018 |
| STM1219   | ycfW | integral membrane protein                         | <b>0.20</b>  | 0.60112 |
| STM1219   | ycfW | integral membrane protein                         | <b>-0.09</b> | 0.88018 |
| STM1220   | ycfX | putative regulatory protein                       | <b>-0.32</b> | 0.37011 |
| STM1220   | ycfX | putative regulatory protein                       | <b>0.16</b>  | 0.75739 |
| STM1221   | cobB | NAD-dependent deacetylase                         | <b>-0.01</b> | 0.97720 |
| STM1221   | cobB | NAD-dependent deacetylase                         | <b>-0.02</b> | 0.98266 |
|           |      | spermidine/putrescine ABC transporter periplasmic |              |         |
| STM1222   | potD | substrate-binding                                 | <b>-0.40</b> | 0.38668 |
|           |      | spermidine/putrescine ABC transporter periplasmic |              |         |
| STM1222   | potD | substrate-binding                                 | <b>0.16</b>  | 0.84021 |
|           |      | spermidine/putrescine ABC transporter membrane    |              |         |
| STM1223   | potC | component                                         | <b>-0.03</b> | 0.95491 |
|           |      | spermidine/putrescine ABC transporter membrane    |              |         |
| STM1223   | potC | component                                         | <b>0.18</b>  | 0.74374 |

|           |         |                                                         |              |         |
|-----------|---------|---------------------------------------------------------|--------------|---------|
| STM1224   | sifA    | secreted effector protein                               | <b>-0.23</b> | 0.67005 |
| STM1224   | sifA    | secreted effector protein                               | <b>0.14</b>  | 0.74312 |
|           |         | spermidine/putrescine ABC transporter membrane          |              |         |
| STM1225   | potB    | component                                               | <b>0.02</b>  | 0.97168 |
|           |         | spermidine/putrescine ABC transporter membrane          |              |         |
| STM1225   | potB    | component                                               | <b>0.04</b>  | 0.93767 |
| STM1226   | potA    | putrescine/spermidine ABC transporter ATPase            | <b>0.01</b>  | 0.98280 |
| STM1226   | potA    | putrescine/spermidine ABC transporter ATPase            | <b>0.65</b>  | 0.15859 |
| STM1227   | pepT    | peptidase T                                             | <b>-0.14</b> | 0.72518 |
| STM1227   | pepT    | peptidase T                                             | <b>0.58</b>  | 0.30525 |
| STM1228   | STM1228 | putative periplasmic protein                            | <b>-0.50</b> | 0.22540 |
| STM1228   | STM1228 | putative periplasmic protein                            | <b>0.05</b>  | 0.93767 |
| STM1229   | ycfD    | putative cytoplasmic protein                            | <b>-0.95</b> | 0.14285 |
| STM1229   | ycfD    | putative cytoplasmic protein                            | <b>-0.24</b> | 0.49708 |
| STM1230   | phoQ    | sensor kinase protein                                   | <b>-1.56</b> | 0.02425 |
| STM1230   | phoQ    | sensor kinase protein                                   | <b>-1.48</b> | 0.02425 |
| STM1231   | phoP    | response regulator                                      | <b>-2.91</b> | 0.00655 |
| STM1231   | phoP    | response regulator                                      | <b>-2.09</b> | 0.01765 |
| STM1232   | purB    | adenylosuccinate lyase                                  | <b>-0.47</b> | 0.34193 |
| STM1232   | purB    | adenylosuccinate lyase                                  | <b>-0.10</b> | 0.86017 |
| STM1233   | ycfC    | hypothetical protein STM1233                            | <b>0.05</b>  | 0.90990 |
| STM1233   | ycfC    | hypothetical protein STM1233                            | <b>0.12</b>  | 0.76074 |
|           |         | tRNA (5-methylaminomethyl-2-thiouridylate)-             |              |         |
| STM1234,S | trmU    | methyltransferase                                       | <b>-0.17</b> | 0.74481 |
|           |         | tRNA (5-methylaminomethyl-2-thiouridylate)-             |              |         |
| STM1234,S | trmU    | methyltransferase                                       | <b>-0.15</b> | 0.70229 |
| STM1235   | ymfB    | putative MutT-like protein                              | <b>-0.07</b> | 0.86339 |
| STM1235   | ymfB    | putative MutT-like protein                              | <b>-0.17</b> | 0.72521 |
| STM1236   | STM1236 | putative periplasmic protein                            | <b>-0.10</b> | 0.82624 |
| STM1236   | STM1236 | putative periplasmic protein                            | <b>0.09</b>  | 0.87727 |
| STM1237   | ymfC    | putative ribosomal large subunit pseudouridine synthase | <b>0.08</b>  | 0.89621 |
| STM1237   | ymfC    | putative ribosomal large subunit pseudouridine synthase | <b>0.79</b>  | 0.26261 |
| STM1238   | icdA    | isocitrate dehydrogenase                                | <b>0.24</b>  | 0.66155 |
| STM1238   | icdA    | isocitrate dehydrogenase                                | <b>0.53</b>  | 0.25565 |
| STM1239   | STM1239 | putative cytoplasmic protein                            | <b>0.09</b>  | 0.88240 |
| STM1239   | STM1239 | putative cytoplasmic protein                            | <b>0.26</b>  | 0.53827 |
| STM1240   | envF    | putative envelope lipoprotein                           | <b>-0.99</b> | 0.13645 |
| STM1240   | envF    | putative envelope lipoprotein                           | <b>0.40</b>  | 0.61837 |
| STM1241   | msgA    | macrophage survival protein                             | <b>-0.14</b> | 0.72247 |
| STM1241   | msgA    | macrophage survival protein                             | <b>0.16</b>  | 0.79676 |
| STM1242   | envE    | putative envelope protein                               | <b>-0.41</b> | 0.31249 |
| STM1242   | envE    | putative envelope protein                               | <b>0.92</b>  | 0.08322 |
| STM1246   | pagC    | virulence membrane protein PAGC precursor               | <b>-0.09</b> | 0.90057 |
| STM1246   | pagC    | virulence membrane protein PAGC precursor               | <b>0.27</b>  | 0.68915 |
| STM1247   | -       | STM1247                                                 | <b>0.79</b>  | 0.58802 |
| STM1247   | -       | STM1247                                                 | <b>0.44</b>  | 0.30422 |
| STM1249   | STM1249 | putative periplasmic protein                            | <b>0.21</b>  | 0.76538 |
| STM1249   | STM1249 | putative periplasmic protein                            | <b>0.31</b>  | 0.62503 |
| STM1250   | STM1250 | putative cytoplasmic protein                            | <b>-0.14</b> | 0.71139 |
| STM1250   | STM1250 | putative cytoplasmic protein                            | <b>0.28</b>  | 0.66715 |
| STM1251   | STM1251 | putative molecular chaperone                            | <b>0.07</b>  | 0.94985 |
| STM1251   | STM1251 | putative molecular chaperone                            | <b>0.22</b>  | 0.69921 |
| STM1252   | STM1252 | putative cytoplasmic protein                            | <b>-0.35</b> | 0.67685 |
| STM1252   | STM1252 | putative cytoplasmic protein                            | <b>0.49</b>  | 0.42735 |
| STM1253   | STM1253 | putative inner membrane protein                         | <b>-0.41</b> | 0.54624 |
| STM1253   | STM1253 | putative inner membrane protein                         | <b>0.09</b>  | 0.89130 |
| STM1254   | STM1254 | putative outer membrane lipoprotein                     | <b>-0.73</b> | 0.18248 |
| STM1254   | STM1254 | putative outer membrane lipoprotein                     | <b>-0.87</b> | 0.15466 |
| STM1255   | STM1255 | putative ABC transporter periplasmic binding protein    | <b>-0.18</b> | 0.72247 |
| STM1255   | STM1255 | putative ABC transporter periplasmic binding protein    | <b>0.10</b>  | 0.83040 |
| STM1256   | STM1256 | putative ABC transporter protein                        | <b>-0.07</b> | 0.90400 |
| STM1256   | STM1256 | putative ABC transporter protein                        | <b>0.24</b>  | 0.72821 |
| STM1257   | STM1257 | putative ABC transporter protein                        | <b>-0.23</b> | 0.65612 |

|            |            |                                                     |              |         |
|------------|------------|-----------------------------------------------------|--------------|---------|
| STM1257    | STM1257    | putative ABC transporter protein                    | <b>-0.02</b> | 0.97348 |
| STM1258    | STM1258    | putative ABC-type transport system ATPase component | <b>-0.39</b> | 0.31236 |
| STM1258    | STM1258    | putative ABC-type transport system ATPase component | <b>0.62</b>  | 0.24319 |
| STM1259    | STM1259    | putative ABC-type transport system ATPase component | <b>-0.06</b> | 0.93974 |
| STM1259    | STM1259    | putative ABC-type transport system ATPase component | <b>0.14</b>  | 0.85504 |
| STM1260    | STM1260    | putative inner membrane protein                     | <b>0.08</b>  | 0.89546 |
| STM1260    | STM1260    | putative inner membrane protein                     | <b>0.52</b>  | 0.30748 |
| STM1261    | STM1261    | putative cytoplasmic protein                        | <b>-0.02</b> | 0.97415 |
| STM1261    | STM1261    | putative cytoplasmic protein                        | <b>0.44</b>  | 0.27004 |
| STM1262    | -          | STM1262                                             | <b>-0.47</b> | 0.63562 |
| STM1262    | -          | STM1262                                             | <b>-0.11</b> | 0.85718 |
| STM1263    | STM1263    | putative periplasmic protein                        | <b>-0.54</b> | 0.18883 |
| STM1263    | STM1263    | putative periplasmic protein                        | <b>-0.10</b> | 0.88897 |
| STM1264    | aadA       | aminoglycoside adenyltransferase                    | <b>0.07</b>  | 0.89126 |
| STM1264    | aadA       | aminoglycoside adenyltransferase                    | <b>0.42</b>  | 0.27378 |
| STM1265    | STM1265    | putative response regulator                         | <b>-0.78</b> | 0.38277 |
| STM1265    | STM1265    | putative response regulator                         | <b>0.11</b>  | 0.84783 |
| STM1266    | STM1266    | putative transcriptional regulator                  | <b>-0.01</b> | 0.99213 |
| STM1266    | STM1266    | putative transcriptional regulator                  | <b>0.56</b>  | 0.42486 |
| STM1267    | STM1267    | putative cytoplasmic protein                        | <b>-0.02</b> | 0.98332 |
| STM1267    | STM1267    | putative cytoplasmic protein                        | <b>0.52</b>  | 0.31456 |
| STM1268    | STM1268    | putative cytoplasmic protein                        | <b>-0.11</b> | 0.85718 |
| STM1268    | STM1268    | putative cytoplasmic protein                        | <b>-0.14</b> | 0.76387 |
| STM1269    | STM1269    | chorismate mutase                                   | <b>-0.79</b> | 0.11913 |
| STM1269    | STM1269    | chorismate mutase                                   | <b>-0.20</b> | 0.65181 |
| STM1270    | yeaS       | putative transport protein                          | <b>0.15</b>  | 0.72821 |
| STM1270    | yeaS       | putative transport protein                          | <b>-0.08</b> | 0.88213 |
| STM1271    | yeaR       | putative cytoplasmic protein                        | <b>-0.38</b> | 0.38425 |
| STM1271    | yeaR       | putative cytoplasmic protein                        | <b>0.10</b>  | 0.86947 |
| STM1273    | STM1273    | putative nitric oxide reductase                     | <b>0.16</b>  | 0.79898 |
| STM1273    | STM1273    | putative nitric oxide reductase                     | <b>1.06</b>  | 0.14030 |
| STM1273,1n | STM1273,1n | hypothetical protein STM1273,1n                     | <b>0.14</b>  | 0.69882 |
| STM1273,1n | STM1273,1n | hypothetical protein STM1273,1n                     | <b>0.35</b>  | 0.42580 |
| STM1274    | yeaQ       | putative inner membrane protein                     | <b>-0.05</b> | 0.93023 |
| STM1274    | yeaQ       | putative inner membrane protein                     | <b>0.17</b>  | 0.78973 |
| STM1275    | yaoF       | putative hemolysin                                  | <b>-0.09</b> | 0.88306 |
| STM1275    | yaoF       | putative hemolysin                                  | <b>0.46</b>  | 0.34070 |
| STM1276    | STM1276    | putative periplasmic protein                        | <b>-0.36</b> | 0.48567 |
| STM1276    | STM1276    | putative periplasmic protein                        | <b>0.24</b>  | 0.59757 |
| STM1277    | yeaO       | putative cytoplasmic protein                        | <b>-0.68</b> | 0.25845 |
| STM1277    | yeaO       | putative cytoplasmic protein                        | <b>0.25</b>  | 0.55618 |
| STM1278    | yeaN       | putative amino acid/amine transport protein         | <b>-0.19</b> | 0.67486 |
| STM1278    | yeaN       | putative amino acid/amine transport protein         | <b>0.27</b>  | 0.60620 |
| STM1279    | yeaM       | putative regulatory protein                         | <b>-0.56</b> | 0.23772 |
| STM1279    | yeaM       | putative regulatory protein                         | <b>0.22</b>  | 0.67184 |
| STM1280    | yeaL       | putative inner membrane protein                     | <b>0.44</b>  | 0.61656 |
| STM1280    | yeaL       | putative inner membrane protein                     | <b>0.53</b>  | 0.33452 |
| STM1282    | yeaK       | putative cytoplasmic protein                        | <b>0.54</b>  | 0.35373 |
| STM1282    | yeaK       | putative cytoplasmic protein                        | <b>1.11</b>  | 0.24444 |
| STM1283    | yeaJ       | putative methyl-accepting chemotaxis protein        | <b>-0.49</b> | 0.32172 |
| STM1283    | yeaJ       | putative methyl-accepting chemotaxis protein        | <b>0.32</b>  | 0.62290 |
| STM1284    | yeaH       | hypothetical protein STM1284                        | <b>-0.32</b> | 0.68418 |
| STM1284    | yeaH       | hypothetical protein STM1284                        | <b>0.43</b>  | 0.55927 |
| STM1285    | yeaG       | putative serine protein kinase                      | <b>-0.15</b> | 0.85548 |
| STM1285    | yeaG       | putative serine protein kinase                      | <b>0.25</b>  | 0.62988 |
| STM1286    | mipA       | MltA-interacting protein A                          | <b>-0.04</b> | 0.93804 |
| STM1286    | mipA       | MltA-interacting protein A                          | <b>-0.11</b> | 0.81556 |
| STM1287    | STM1287    | arylsulfatase regulator                             | <b>-0.04</b> | 0.95608 |
| STM1287    | STM1287    | arylsulfatase regulator                             | <b>0.16</b>  | 0.81518 |
| STM1288    | STM1288    | putative aldehyde reductase                         | <b>-0.37</b> | 0.42811 |
| STM1288    | STM1288    | putative aldehyde reductase                         | <b>0.02</b>  | 0.98001 |
| STM1289    | yeaD       | aldose 1-epimerase                                  | <b>-0.12</b> | 0.80406 |
| STM1289    | yeaD       | aldose 1-epimerase                                  | <b>-0.22</b> | 0.66743 |

|         |         |                                                           |              |         |
|---------|---------|-----------------------------------------------------------|--------------|---------|
| STM1290 | gapA    | glyceraldehyde-3-phosphate dehydrogenase                  | <b>-0.22</b> | 0.78879 |
| STM1290 | gapA    | glyceraldehyde-3-phosphate dehydrogenase                  | <b>0.26</b>  | 0.72958 |
| STM1291 | yeaA    | methionine sulfoxide reductase B                          | <b>-0.23</b> | 0.54162 |
| STM1291 | yeaA    | methionine sulfoxide reductase B                          | <b>0.04</b>  | 0.94727 |
| STM1292 | yeaC    | putative cytoplasmic protein                              | <b>-0.81</b> | 0.13112 |
| STM1292 | yeaC    | putative cytoplasmic protein                              | <b>-0.40</b> | 0.32016 |
| STM1293 | pncA    | nicotinamidase/pyrazinamidase                             | <b>-0.26</b> | 0.53336 |
| STM1293 | pncA    | nicotinamidase/pyrazinamidase                             | <b>0.19</b>  | 0.61843 |
| STM1294 | ansA    | cytoplasmic asparaginase I                                | <b>-0.10</b> | 0.80198 |
| STM1294 | ansA    | cytoplasmic asparaginase I                                | <b>0.49</b>  | 0.24721 |
| STM1295 | sppA    | protease IV                                               | <b>-0.23</b> | 0.54347 |
| STM1295 | sppA    | protease IV                                               | <b>0.03</b>  | 0.95059 |
| STM1296 | ydjA    | putative oxidoreductase                                   | <b>-0.12</b> | 0.74585 |
| STM1296 | ydjA    | putative oxidoreductase                                   | <b>0.07</b>  | 0.88004 |
| STM1297 | sclD    | selenophosphate synthetase                                | <b>0.07</b>  | 0.85718 |
| STM1297 | sclD    | selenophosphate synthetase                                | <b>0.59</b>  | 0.15859 |
| STM1298 | topB    | DNA topoisomerase III                                     | <b>0.12</b>  | 0.86017 |
| STM1298 | topB    | DNA topoisomerase III                                     | <b>-0.25</b> | 0.52208 |
| STM1299 | gdhA    | glutamate dehydrogenase                                   | <b>-0.45</b> | 0.35373 |
| STM1299 | gdhA    | glutamate dehydrogenase                                   | <b>0.05</b>  | 0.93568 |
| STM1300 | STM1300 | putative periplasmic protein                              | <b>-0.49</b> | 0.35955 |
| STM1300 | STM1300 | putative periplasmic protein                              | <b>0.31</b>  | 0.37881 |
| STM1301 | STM1301 | putative mutator protein                                  | <b>-0.11</b> | 0.76319 |
| STM1301 | STM1301 | putative mutator protein                                  | <b>-0.09</b> | 0.87727 |
| STM1302 | xthA    | exonuclease III                                           | <b>-0.34</b> | 0.46629 |
| STM1302 | xthA    | exonuclease III                                           | <b>-0.17</b> | 0.69198 |
| STM1303 | argD    | bifunctional                                              | <b>-0.17</b> | 0.72254 |
| STM1303 | argD    | bifunctional                                              | <b>0.00</b>  | 0.99800 |
| STM1304 | astA    | arginine succinyltransferase                              | <b>-0.29</b> | 0.44998 |
| STM1304 | astA    | arginine succinyltransferase                              | <b>0.46</b>  | 0.24444 |
| STM1305 | astD    | aldehyde dehydrogenase                                    | <b>0.16</b>  | 0.87733 |
| STM1305 | astD    | aldehyde dehydrogenase                                    | <b>-0.19</b> | 0.75002 |
| STM1306 | astB    | succinylarginine dihydrolase                              | <b>0.11</b>  | 0.86654 |
| STM1306 | astB    | succinylarginine dihydrolase                              | <b>0.62</b>  | 0.29543 |
| STM1307 | astE    | succinylglutamate desuccinylase                           | <b>-0.49</b> | 0.26378 |
| STM1307 | astE    | succinylglutamate desuccinylase                           | <b>0.17</b>  | 0.73904 |
| STM1308 | spy     | putative stress response protein                          | <b>-0.08</b> | 0.93492 |
| STM1308 | spy     | putative stress response protein                          | <b>0.12</b>  | 0.84099 |
| STM1309 | STM1309 | putative excinuclease subunit                             | <b>-0.12</b> | 0.76811 |
| STM1309 | STM1309 | putative excinuclease subunit                             | <b>0.37</b>  | 0.36701 |
| STM1310 | nadE    | NAD(+) synthetase                                         | <b>-0.81</b> | 0.13978 |
| STM1310 | nadE    | NAD(+) synthetase                                         | <b>-0.02</b> | 0.96785 |
| STM1311 | osmE    | transcriptional activator                                 | <b>-0.55</b> | 0.20783 |
| STM1311 | osmE    | transcriptional activator                                 | <b>0.46</b>  | 0.48814 |
| STM1312 | celA    | sugar-specific enzyme IIB                                 | <b>0.27</b>  | 0.47804 |
| STM1312 | celA    | sugar-specific enzyme IIB                                 | <b>0.34</b>  | 0.49740 |
| STM1313 | celB    | sugar-specific enzyme II                                  | <b>-0.78</b> | 0.14030 |
| STM1313 | celB    | sugar-specific enzyme II                                  | <b>0.46</b>  | 0.44127 |
| STM1314 | celC    | sugar-specific enzyme III                                 | <b>-0.26</b> | 0.58851 |
| STM1314 | celC    | sugar-specific enzyme III                                 | <b>0.05</b>  | 0.93023 |
| STM1315 | celD    | transcriptional repressor of cel operon                   | <b>-0.17</b> | 0.74087 |
| STM1315 | celD    | transcriptional repressor of cel operon                   | <b>-0.15</b> | 0.77895 |
| STM1316 | celF    | phospho-beta-glucosidase/cellobiose-6-phosphate hydrolase | <b>-0.88</b> | 0.13112 |
| STM1316 | celF    | phospho-beta-glucosidase/cellobiose-6-phosphate hydrolase | <b>-0.22</b> | 0.59824 |
| STM1317 | celG    | hypothetical protein STM1317                              | <b>-0.61</b> | 0.22283 |
| STM1317 | celG    | hypothetical protein STM1317                              | <b>0.17</b>  | 0.74807 |
| STM1318 | katE    | hydroperoxidase HP11                                      | <b>-0.31</b> | 0.66112 |
| STM1318 | katE    | hydroperoxidase HP11                                      | <b>0.72</b>  | 0.43219 |
| STM1319 | cedA    | cell division modulator protein                           | <b>0.15</b>  | 0.74243 |
| STM1319 | cedA    | cell division modulator protein                           | <b>0.33</b>  | 0.46927 |
| STM1320 | ydjN    | kinase/transporter-like protein                           | <b>-0.28</b> | 0.57021 |

|           |         |                                            |              |         |
|-----------|---------|--------------------------------------------|--------------|---------|
| STM1320   | ydiN    | kinase/transporter-like protein            | <b>-0.32</b> | 0.48600 |
| STM1321   | ydiM    | putative SOS response protein              | <b>-0.07</b> | 0.88959 |
| STM1321   | ydiM    | putative SOS response protein              | <b>0.22</b>  | 0.66677 |
| STM1322   | yniC    | putative enzyme                            | <b>-0.50</b> | 0.19843 |
| STM1322   | yniC    | putative enzyme                            | <b>0.06</b>  | 0.91301 |
| STM1323   | yniB    | putative regulatory protein                | <b>-0.13</b> | 0.74374 |
| STM1323   | yniB    | putative regulatory protein                | <b>0.02</b>  | 0.96568 |
| STM1324   | STM1324 | putative cytoplasmic protein               | <b>-0.05</b> | 0.92937 |
| STM1324   | STM1324 | putative cytoplasmic protein               | <b>0.09</b>  | 0.87110 |
| STM1325   | ydiZ    | putative cytoplasmic protein               | <b>-0.74</b> | 0.14030 |
| STM1325   | ydiZ    | putative cytoplasmic protein               | <b>-0.10</b> | 0.85431 |
| STM1326   | pfkB    | 6-phosphofructokinase II                   | <b>-0.06</b> | 0.92351 |
| STM1326   | pfkB    | 6-phosphofructokinase II                   | <b>-0.32</b> | 0.50474 |
| STM1327   | ydiY    | putative outer membrane protein            | <b>0.00</b>  | 0.99447 |
| STM1327   | ydiY    | putative outer membrane protein            | <b>0.17</b>  | 0.68240 |
| STM1328   | STM1328 | putative outer membrane protein            | <b>0.16</b>  | 0.67363 |
| STM1328   | STM1328 | putative outer membrane protein            | <b>0.63</b>  | 0.19967 |
| STM1329   | STM1329 | putative inner membrane protein            | <b>0.17</b>  | 0.69633 |
| STM1329   | STM1329 | putative inner membrane protein            | <b>0.03</b>  | 0.95721 |
| STM1330   | STM1330 | putative DNA/RNA non-specific endonuclease | <b>-0.17</b> | 0.70545 |
| STM1330   | STM1330 | putative DNA/RNA non-specific endonuclease | <b>0.42</b>  | 0.26910 |
| STM1332   | rfc     | O-antigen polymerase                       | <b>-0.24</b> | 0.61720 |
| STM1332   | rfc     | O-antigen polymerase                       | <b>0.11</b>  | 0.78992 |
| STM1333   | thrS    | threonyl-tRNA synthetase                   | <b>-0.07</b> | 0.91456 |
| STM1333   | thrS    | threonyl-tRNA synthetase                   | <b>0.23</b>  | 0.65355 |
| STM1334,c | infC    | translation initiation factor IF-3         | <b>0.08</b>  | 0.85758 |
| STM1334,c | infC    | translation initiation factor IF-3         | <b>0.34</b>  | 0.58410 |
| STM1335   | rpml    | 50S ribosomal protein L35                  | <b>-0.13</b> | 0.75512 |
| STM1335   | rpml    | 50S ribosomal protein L35                  | <b>0.24</b>  | 0.57506 |
| STM1336   | rplT    | 50S ribosomal protein L20                  | <b>-0.09</b> | 0.84994 |
| STM1336   | rplT    | 50S ribosomal protein L20                  | <b>0.00</b>  | 0.99452 |
| STM1337   | pheS    | phenylalanyl-tRNA synthetase alpha subunit | <b>-0.18</b> | 0.61809 |
| STM1337   | pheS    | phenylalanyl-tRNA synthetase alpha subunit | <b>0.12</b>  | 0.78255 |
| STM1338   | pheT    | phenylalanyl-tRNA synthetase beta subunit  | <b>-0.07</b> | 0.87733 |
| STM1338   | pheT    | phenylalanyl-tRNA synthetase beta subunit  | <b>0.12</b>  | 0.79473 |
| STM1339   | himA    | integration host factor alpha subunit      | <b>-0.62</b> | 0.25197 |
| STM1339   | himA    | integration host factor alpha subunit      | <b>-0.35</b> | 0.35694 |
| STM1340   | btuC    | vitamin B12-transporter permease           | <b>-0.20</b> | 0.72341 |
| STM1340   | btuC    | vitamin B12-transporter permease           | <b>0.11</b>  | 0.77324 |
| STM1341   | btuE    | vitamin B12 transport protein              | <b>-0.39</b> | 0.31422 |
| STM1341   | btuE    | vitamin B12 transport protein              | <b>0.38</b>  | 0.40562 |
| STM1342   | btuD    | vitamin B12-transporter ATPase             | <b>0.04</b>  | 0.93841 |
| STM1342   | btuD    | vitamin B12-transporter ATPase             | <b>0.55</b>  | 0.42735 |
| STM1343   | nlpC    | lipoprotein                                | <b>-0.37</b> | 0.52897 |
| STM1343   | nlpC    | lipoprotein                                | <b>0.03</b>  | 0.94880 |
| STM1344   | ydiV    | hypothetical protein STM1344               | <b>0.10</b>  | 0.83107 |
| STM1344   | ydiV    | hypothetical protein STM1344               | <b>0.58</b>  | 0.21360 |
| STM1345   | ydiU    | hypothetical protein STM1345               | <b>-0.16</b> | 0.72375 |
| STM1345   | ydiU    | hypothetical protein STM1345               | <b>0.80</b>  | 0.14030 |
| STM1346   | ydiE    | putative cytoplasmic protein               | <b>0.22</b>  | 0.54560 |
| STM1346   | ydiE    | putative cytoplasmic protein               | <b>0.64</b>  | 0.23114 |
| STM1347   | aroH    | 3-deoxy-7-phosphoheptulonate synthase      | <b>-0.40</b> | 0.49336 |
| STM1347   | aroH    | 3-deoxy-7-phosphoheptulonate synthase      | <b>0.10</b>  | 0.86895 |
| STM1348   | ydiA    | hypothetical protein STM1348               | <b>-0.18</b> | 0.68021 |
| STM1348   | ydiA    | hypothetical protein STM1348               | <b>0.42</b>  | 0.31280 |
| STM1349   | pps     | phosphoenolpyruvate synthase               | <b>-0.05</b> | 0.93554 |
| STM1349   | pps     | phosphoenolpyruvate synthase               | <b>0.63</b>  | 0.17793 |
| STM1350   | ydiD    | hypothetical protein STM1350               | <b>0.50</b>  | 0.33452 |
| STM1350   | ydiD    | hypothetical protein STM1350               | <b>0.39</b>  | 0.58345 |
| STM1351   | ydiT    | putative ferredoxin                        | <b>-0.18</b> | 0.69372 |
| STM1351   | ydiT    | putative ferredoxin                        | <b>0.86</b>  | 0.16534 |
| STM1352   | ydiS    | flavoprotein                               | <b>-0.28</b> | 0.70846 |
| STM1352   | ydiS    | flavoprotein                               | <b>0.17</b>  | 0.64416 |

|           |         |                                                              |              |         |
|-----------|---------|--------------------------------------------------------------|--------------|---------|
| STM1353   | ydiR    | putative electron transfer flavoprotein subunit alpha        | <b>-0.22</b> | 0.76538 |
| STM1353   | ydiR    | putative electron transfer flavoprotein subunit alpha        | <b>0.51</b>  | 0.22283 |
| STM1354   | ydiQ    | putative electron transfer flavoprotein subunit beta         | <b>-0.32</b> | 0.64422 |
| STM1354   | ydiQ    | putative electron transfer flavoprotein subunit beta         | <b>0.39</b>  | 0.37161 |
| STM1355   | ydiP    | putative transcriptional regulator                           | <b>-0.67</b> | 0.16534 |
| STM1355   | ydiP    | putative transcriptional regulator                           | <b>-0.04</b> | 0.95463 |
| STM1356   | ydiO    | crotonobetainyl-CoA dehydrogenase                            | <b>-0.78</b> | 0.70077 |
| STM1356   | ydiO    | crotonobetainyl-CoA dehydrogenase                            | <b>0.83</b>  | 0.58912 |
| STM1357,S | ydiF    | putative acetyl-CoA/acetoacetyl-CoA transferase beta subunit | <b>-0.38</b> | 0.34070 |
| STM1357,S | ydiF    | putative acetyl-CoA/acetoacetyl-CoA transferase beta subunit | <b>0.36</b>  | 0.36833 |
| STM1358   | aroD    | 3-dehydroquinate dehydratase                                 | <b>-0.35</b> | 0.46629 |
| STM1358   | aroD    | 3-dehydroquinate dehydratase                                 | <b>0.40</b>  | 0.46199 |
| STM1359   | aroE    | shikimate 5-dehydrogenase                                    | <b>-0.28</b> | 0.62873 |
| STM1359   | aroE    | shikimate 5-dehydrogenase                                    | <b>0.48</b>  | 0.34574 |
| STM1360   | ydiN    | putative transport protein                                   | <b>-0.49</b> | 0.46266 |
| STM1360   | ydiN    | putative transport protein                                   | <b>-0.39</b> | 0.68140 |
| STM1361   | ydiM    | putative transport protein                                   | <b>-0.89</b> | 0.13645 |
| STM1361   | ydiM    | putative transport protein                                   | <b>0.67</b>  | 0.15842 |
| STM1362   | ydiL    | putative cytoplasmic protein                                 | <b>-0.18</b> | 0.83902 |
| STM1362   | ydiL    | putative cytoplasmic protein                                 | <b>0.30</b>  | 0.72247 |
| STM1363   | rprA    | STM1363                                                      | <b>-0.20</b> | 0.75831 |
| STM1363   | rprA    | STM1363                                                      | <b>-0.18</b> | 0.70185 |
| STM1364   | ydiK    | putative permease                                            | <b>-0.48</b> | 0.30496 |
| STM1364   | ydiK    | putative permease                                            | <b>0.11</b>  | 0.82637 |
| STM1365   | ydiJ    | putative oxidase                                             | <b>-0.08</b> | 0.84963 |
| STM1365   | ydiJ    | putative oxidase                                             | <b>0.25</b>  | 0.56637 |
| STM1366   | STM1366 | hypothetical protein STM1366                                 | <b>-0.10</b> | 0.85893 |
| STM1366   | STM1366 | hypothetical protein STM1366                                 | <b>-0.04</b> | 0.91789 |
| STM1367   | ydiH    | putative cytoplasmic protein                                 | <b>-0.16</b> | 0.82153 |
| STM1367   | ydiH    | putative cytoplasmic protein                                 | <b>-0.13</b> | 0.88868 |
| STM1368   | STM1368 | putative Na <sup>+</sup> -dicarboxylate symporter            | <b>-0.21</b> | 0.63148 |
| STM1368   | STM1368 | putative Na <sup>+</sup> -dicarboxylate symporter            | <b>0.50</b>  | 0.29796 |
| STM1369   | sufA    | iron-sulfur cluster assembly scaffold protein                | <b>0.13</b>  | 0.82964 |
| STM1369   | sufA    | iron-sulfur cluster assembly scaffold protein                | <b>0.65</b>  | 0.16281 |
| STM1370   | sufB    | putative ABC transporter protein                             | <b>0.36</b>  | 0.39560 |
| STM1370   | sufB    | putative ABC transporter protein                             | <b>-0.40</b> | 0.78909 |
| STM1371   | sufC    | putative transport protein                                   | <b>0.01</b>  | 0.99452 |
| STM1371   | sufC    | putative transport protein                                   | <b>0.35</b>  | 0.55439 |
| STM1372   | sufD    | cysteine desulfurase modulator                               | <b>-0.05</b> | 0.93205 |
| STM1372   | sufD    | cysteine desulfurase modulator                               | <b>-0.04</b> | 0.92884 |
| STM1373   | sufS    | selenocysteine lyase                                         | <b>-0.05</b> | 0.91378 |
| STM1373   | sufS    | selenocysteine lyase                                         | <b>0.72</b>  | 0.18876 |
| STM1374   | ynhA    | cysteine desulfuration protein SufE                          | <b>-0.17</b> | 0.68439 |
| STM1374   | ynhA    | cysteine desulfuration protein SufE                          | <b>0.40</b>  | 0.34106 |
| STM1375   | ynhG    | hypothetical protein STM1375                                 | <b>-0.38</b> | 0.43148 |
| STM1375   | ynhG    | hypothetical protein STM1375                                 | <b>-0.30</b> | 0.57278 |
| STM1376   | lppB    | putative methyl-accepting chemotaxis protein                 | <b>0.58</b>  | 0.55976 |
| STM1376   | lppB    | putative methyl-accepting chemotaxis protein                 | <b>0.51</b>  | 0.47515 |
| STM1377   | lpp     | murein lipoprotein                                           | <b>-0.61</b> | 0.40562 |
| STM1377   | lpp     | murein lipoprotein                                           | <b>-0.42</b> | 0.44808 |
| STM1378   | pykF    | pyruvate kinase                                              | <b>-0.39</b> | 0.38363 |
| STM1378   | pykF    | pyruvate kinase                                              | <b>-0.39</b> | 0.35955 |
| STM1379   | orf48   | putative amino acid permease                                 | <b>-0.12</b> | 0.78016 |
| STM1379   | orf48   | putative amino acid permease                                 | <b>0.06</b>  | 0.91111 |
| STM1380   | orf32   | putative proline iminopeptidase                              | <b>0.37</b>  | 0.35010 |
| STM1380   | orf32   | putative proline iminopeptidase                              | <b>0.16</b>  | 0.73213 |
| STM1381   | orf245  | putative cytoplasmic protein                                 | <b>-0.02</b> | 0.97583 |
| STM1381   | orf245  | putative cytoplasmic protein                                 | <b>-0.12</b> | 0.80406 |
| STM1382   | orf408  | putative regulatory protein                                  | <b>-0.02</b> | 0.97168 |
| STM1382   | orf408  | putative regulatory protein                                  | <b>0.33</b>  | 0.37967 |
| STM1383   | ttrA    | tetrathionate reductase complex subunit A                    | <b>0.30</b>  | 0.73473 |

|         |         |                                             |              |         |
|---------|---------|---------------------------------------------|--------------|---------|
| STM1383 | ttrA    | tetrathionate reductase complex subunit A   | <b>0.85</b>  | 0.29871 |
| STM1384 | ttrC    | tetrathionate reductase complex subunit C   | <b>-0.45</b> | 0.23879 |
| STM1384 | ttrC    | tetrathionate reductase complex subunit C   | <b>0.32</b>  | 0.69447 |
| STM1385 | ttrB    | tetrathionate reductase complex subunit B   | <b>-0.03</b> | 0.97837 |
| STM1385 | ttrB    | tetrathionate reductase complex subunit B   | <b>-0.07</b> | 0.91170 |
| STM1386 | ttrS    | sensory histidine kinase                    | <b>-0.09</b> | 0.94357 |
| STM1386 | ttrS    | sensory histidine kinase                    | <b>0.27</b>  | 0.73653 |
| STM1387 | ttrR    | response regulator                          | <b>-0.30</b> | 0.48166 |
| STM1387 | ttrR    | response regulator                          | <b>-0.14</b> | 0.76981 |
| STM1388 | orf70   | putative cytoplasmic protein                | <b>-0.39</b> | 0.42277 |
| STM1388 | orf70   | putative cytoplasmic protein                | <b>-0.08</b> | 0.87182 |
| STM1389 | orf319  | putative inner membrane protein             | <b>0.26</b>  | 0.49302 |
| STM1389 | orf319  | putative inner membrane protein             | <b>0.39</b>  | 0.56786 |
| STM1390 | orf242  | putative regulatory protein                 | <b>-0.34</b> | 0.61375 |
| STM1390 | orf242  | putative regulatory protein                 | <b>0.61</b>  | 0.33452 |
| STM1391 | ssrB    | transcriptional activator                   | <b>0.43</b>  | 0.52994 |
| STM1391 | ssrB    | transcriptional activator                   | <b>0.26</b>  | 0.65474 |
| STM1392 | ssrA    | sensor kinase                               | <b>-0.23</b> | 0.86769 |
| STM1392 | ssrA    | sensor kinase                               | <b>1.51</b>  | 0.24515 |
| STM1394 | ssaC    | outer membrane secretin precursor           | <b>-0.38</b> | 0.41328 |
| STM1394 | ssaC    | outer membrane secretin precursor           | <b>0.21</b>  | 0.65916 |
| STM1395 | ssaD    | virulence protein                           | <b>-0.39</b> | 0.47610 |
| STM1395 | ssaD    | virulence protein                           | <b>-0.45</b> | 0.40190 |
| STM1396 | ssaE    | secretion system effector                   | <b>-1.43</b> | 0.06967 |
| STM1396 | ssaE    | secretion system effector                   | <b>-0.03</b> | 0.95608 |
| STM1398 | sseB    | translocation machinery component           | <b>0.01</b>  | 0.99252 |
| STM1398 | sseB    | translocation machinery component           | <b>0.44</b>  | 0.44556 |
| STM1399 | sscA    | secretion system chaperone                  | <b>0.00</b>  | 0.99938 |
| STM1399 | sscA    | secretion system chaperone                  | <b>0.67</b>  | 0.22063 |
| STM1400 | sseC    | translocation machinery component           | <b>-0.01</b> | 0.98640 |
| STM1400 | sseC    | translocation machinery component           | <b>0.49</b>  | 0.25719 |
| STM1401 | sseD    | translocation machinery component           | <b>-0.46</b> | 0.39642 |
| STM1401 | sseD    | translocation machinery component           | <b>0.09</b>  | 0.87126 |
| STM1402 | sseE    | secreted effector protein                   | <b>-0.57</b> | 0.25740 |
| STM1402 | sseE    | secreted effector protein                   | <b>1.20</b>  | 0.14030 |
| STM1403 | sscB    | secretion system chaperone                  | <b>-0.07</b> | 0.93688 |
| STM1403 | sscB    | secretion system chaperone                  | <b>1.01</b>  | 0.13831 |
| STM1404 | sseF    | secreted effector protein                   | <b>-0.45</b> | 0.40562 |
| STM1404 | sseF    | secreted effector protein                   | <b>0.24</b>  | 0.63101 |
| STM1405 | sseG    | secreted effector protein                   | <b>-0.29</b> | 0.46629 |
| STM1405 | sseG    | secreted effector protein                   | <b>0.17</b>  | 0.79096 |
| STM1406 | ssaG    | type III secretion system apparatus protein | <b>-0.24</b> | 0.61809 |
| STM1406 | ssaG    | type III secretion system apparatus protein | <b>0.49</b>  | 0.59422 |
| STM1407 | ssaH    | type III secretion system apparatus protein | <b>-0.47</b> | 0.48814 |
| STM1407 | ssaH    | type III secretion system apparatus protein | <b>-0.02</b> | 0.98140 |
| STM1408 | ssal    | type III secretion system apparatus protein | <b>-0.23</b> | 0.61960 |
| STM1408 | ssal    | type III secretion system apparatus protein | <b>0.89</b>  | 0.18464 |
| STM1409 | ssaJ    | needle complex inner membrane lipoprotein   | <b>-0.42</b> | 0.34936 |
| STM1409 | ssaJ    | needle complex inner membrane lipoprotein   | <b>0.27</b>  | 0.52840 |
| STM1410 | STM1410 | putative cytoplasmic protein                | <b>-0.69</b> | 0.41400 |
| STM1410 | STM1410 | putative cytoplasmic protein                | <b>-0.78</b> | 0.76538 |
| STM1411 | ssaK    | type III secretion system apparatus protein | <b>-0.31</b> | 0.65730 |
| STM1411 | ssaK    | type III secretion system apparatus protein | <b>-0.38</b> | 0.44039 |
| STM1412 | ssaL    | type III secretion system apparatus protein | <b>-0.18</b> | 0.69189 |
| STM1412 | ssaL    | type III secretion system apparatus protein | <b>1.09</b>  | 0.13824 |
| STM1413 | ssaM    | type III secretion system apparatus protein | <b>-0.56</b> | 0.17139 |
| STM1413 | ssaM    | type III secretion system apparatus protein | <b>-0.10</b> | 0.85391 |
| STM1414 | ssaV    | type III secretion system apparatus protein | <b>-0.14</b> | 0.91917 |
| STM1414 | ssaV    | type III secretion system apparatus protein | <b>0.11</b>  | 0.83899 |
| STM1415 | ssaN    | type III secretion system ATPase            | <b>-0.25</b> | 0.66636 |
| STM1415 | ssaN    | type III secretion system ATPase            | <b>0.02</b>  | 0.96968 |
| STM1416 | ssaO    | type III secretion system apparatus protein | <b>-0.75</b> | 0.17754 |
| STM1416 | ssaO    | type III secretion system apparatus protein | <b>-0.45</b> | 0.48129 |

|         |         |                                               |              |         |
|---------|---------|-----------------------------------------------|--------------|---------|
| STM1417 | ssaP    | type III secretion system apparatus protein   | <b>0.02</b>  | 0.98210 |
| STM1417 | ssaP    | type III secretion system apparatus protein   | <b>0.21</b>  | 0.64524 |
| STM1418 | ssaQ    | type III secretion protein                    | <b>-0.23</b> | 0.62757 |
| STM1418 | ssaQ    | type III secretion protein                    | <b>0.62</b>  | 0.26856 |
| STM1419 | ssaR    | needle complex export protein                 | <b>-0.09</b> | 0.91724 |
| STM1419 | ssaR    | needle complex export protein                 | <b>0.12</b>  | 0.83386 |
| STM1421 | ssaT    | type III secretion system apparatus protein   | <b>-0.04</b> | 0.95532 |
| STM1421 | ssaT    | type III secretion system apparatus protein   | <b>0.38</b>  | 0.41751 |
| STM1422 | ssaU    | type III secretion system apparatus protein   | <b>-0.09</b> | 0.87208 |
| STM1422 | ssaU    | type III secretion system apparatus protein   | <b>0.52</b>  | 0.23114 |
| STM1423 | valW    | STM1423                                       | <b>0.43</b>  | 0.47824 |
| STM1423 | valW    | STM1423                                       | <b>0.72</b>  | 0.34449 |
| STM1424 | valV    | STM1424                                       | <b>0.45</b>  | 0.69802 |
| STM1424 | valV    | STM1424                                       | <b>0.93</b>  | 0.19967 |
| STM1425 | ydhE    | multidrug efflux protein NorA                 | <b>-0.05</b> | 0.92513 |
| STM1425 | ydhE    | multidrug efflux protein NorA                 | <b>-0.15</b> | 0.77217 |
| STM1426 | ribE    | riboflavin synthase subunit alpha             | <b>0.00</b>  | 0.99822 |
| STM1426 | ribE    | riboflavin synthase subunit alpha             | <b>0.48</b>  | 0.38722 |
| STM1427 | cfa     | cyclopropane fatty acyl phospholipid synthase | <b>-0.06</b> | 0.88811 |
| STM1427 | cfa     | cyclopropane fatty acyl phospholipid synthase | <b>-0.18</b> | 0.64742 |
| STM1428 | ydhC    | putative transport protein                    | <b>-0.04</b> | 0.95127 |
| STM1428 | ydhC    | putative transport protein                    | <b>0.13</b>  | 0.77923 |
| STM1429 | ydhB    | putative transcriptional regulator            | <b>-0.32</b> | 0.53678 |
| STM1429 | ydhB    | putative transcriptional regulator            | <b>0.12</b>  | 0.82384 |
| STM1430 | purR    | pur regulon transcriptional repressor         | <b>-0.10</b> | 0.81449 |
| STM1430 | purR    | pur regulon transcriptional repressor         | <b>-0.11</b> | 0.80070 |
| STM1431 | sodB    | superoxide dismutase                          | <b>-0.52</b> | 0.26975 |
| STM1431 | sodB    | superoxide dismutase                          | <b>0.06</b>  | 0.93731 |
| STM1432 | ydhO    | putative cell wall-associated hydrolase       | <b>-0.61</b> | 0.31367 |
| STM1432 | ydhO    | putative cell wall-associated hydrolase       | <b>-0.19</b> | 0.61720 |
| STM1433 | ydhD    | putative glutaredoxin protein                 | <b>-0.02</b> | 0.96687 |
| STM1433 | ydhD    | putative glutaredoxin protein                 | <b>0.19</b>  | 0.62069 |
| STM1434 | rnt     | ribonuclease T                                | <b>0.08</b>  | 0.84058 |
| STM1434 | rnt     | ribonuclease T                                | <b>-0.11</b> | 0.79635 |
| STM1435 | gloA    | glyoxalase I                                  | <b>-0.31</b> | 0.37942 |
| STM1435 | gloA    | glyoxalase I                                  | <b>0.14</b>  | 0.80915 |
| STM1436 | nemA    | N-ethylmaleimide reductase                    | <b>-0.05</b> | 0.92111 |
| STM1436 | nemA    | N-ethylmaleimide reductase                    | <b>0.39</b>  | 0.48810 |
| STM1437 | ydhM    | putative transcriptional repressor            | <b>0.01</b>  | 0.98790 |
| STM1437 | ydhM    | putative transcriptional repressor            | <b>-0.13</b> | 0.77923 |
| STM1438 | ydhL    | putative oxidoreductase                       | <b>-0.29</b> | 0.48479 |
| STM1438 | ydhL    | putative oxidoreductase                       | <b>-0.29</b> | 0.57026 |
| STM1439 | ydhF    | putative aldo/keto reductase                  | <b>0.02</b>  | 0.96757 |
| STM1439 | ydhF    | putative aldo/keto reductase                  | <b>-0.09</b> | 0.83443 |
| STM1440 | sodC    | copper/zinc superoxide dismutase              | <b>0.20</b>  | 0.68319 |
| STM1440 | sodC    | copper/zinc superoxide dismutase              | <b>0.73</b>  | 0.27522 |
| STM1441 | STM1441 | putative inner membrane protein               | <b>-0.29</b> | 0.59719 |
| STM1441 | STM1441 | putative inner membrane protein               | <b>-0.13</b> | 0.77639 |
| STM1442 | ydhJ    | putative multidrug resistance efflux pump     | <b>-0.27</b> | 0.58355 |
| STM1442 | ydhJ    | putative multidrug resistance efflux pump     | <b>0.45</b>  | 0.28799 |
| STM1444 | slyA    | transcriptional regulator SlyA                | <b>0.03</b>  | 0.94798 |
| STM1444 | slyA    | transcriptional regulator SlyA                | <b>-0.08</b> | 0.89405 |
| STM1445 | slyB    | putative outer membrane lipoprotein           | <b>-1.47</b> | 0.01937 |
| STM1445 | slyB    | putative outer membrane lipoprotein           | <b>-0.79</b> | 0.11690 |
| STM1446 | ydhH    | putative cytoplasmic protein                  | <b>-0.65</b> | 0.44402 |
| STM1446 | ydhH    | putative cytoplasmic protein                  | <b>0.21</b>  | 0.74374 |
| STM1447 | ydhA    | putative outer membrane lipoprotein           | <b>-0.20</b> | 0.58117 |
| STM1447 | ydhA    | putative outer membrane lipoprotein           | <b>0.26</b>  | 0.56095 |
| STM1448 | pdxH    | pyridoxamine 5'-phosphate oxidase             | <b>-0.22</b> | 0.55656 |
| STM1448 | pdxH    | pyridoxamine 5'-phosphate oxidase             | <b>-0.26</b> | 0.49422 |
| STM1449 | tyrS    | tyrosyl-tRNA synthetase                       | <b>-0.14</b> | 0.70229 |
| STM1449 | tyrS    | tyrosyl-tRNA synthetase                       | <b>0.16</b>  | 0.70249 |
| STM1450 | pdxY    | pyridoxine kinase                             | <b>-0.69</b> | 0.21069 |

|           |         |                                                      |              |         |
|-----------|---------|------------------------------------------------------|--------------|---------|
| STM1450   | pdxY    | pyridoxine kinase                                    | <b>0.13</b>  | 0.78335 |
| STM1451   | gst     | glutathionine S-transferase                          | <b>-0.23</b> | 0.56120 |
| STM1451   | gst     | glutathionine S-transferase                          | <b>0.14</b>  | 0.76475 |
| STM1452   | ydgR    | putative peptide transport protein                   | <b>-0.62</b> | 0.21078 |
| STM1452   | ydgR    | putative peptide transport protein                   | <b>0.06</b>  | 0.90400 |
| STM1453   | nth     | endonuclease III                                     | <b>0.03</b>  | 0.98398 |
| STM1453   | nth     | endonuclease III                                     | <b>0.18</b>  | 0.77883 |
| STM1454   | ydgQ    | NADH-ubiquinone oxidoreductase                       | <b>-0.40</b> | 0.40121 |
| STM1454   | ydgQ    | NADH-ubiquinone oxidoreductase                       | <b>0.25</b>  | 0.59820 |
| STM1455   | ydgP    | electron transport complex protein RnfG              | <b>-0.22</b> | 0.61837 |
| STM1455   | ydgP    | electron transport complex protein RnfG              | <b>0.22</b>  | 0.67363 |
| STM1456   | rnfD    | electron transport complex protein RnfD              | <b>-0.21</b> | 0.53263 |
| STM1456   | rnfD    | electron transport complex protein RnfD              | <b>0.06</b>  | 0.91032 |
| STM1457   | STM1457 | electron transport complex protein RnfC              | <b>-0.13</b> | 0.78173 |
| STM1457   | STM1457 | electron transport complex protein RnfC              | <b>0.57</b>  | 0.23114 |
| STM1458   | ydgM    | electron transport complex protein RnfB              | <b>-0.02</b> | 0.96568 |
| STM1458   | ydgM    | electron transport complex protein RnfB              | <b>0.29</b>  | 0.49336 |
| STM1459   | STM1459 | Na(+)-translocating NADH-quinone reductase subunit E | <b>-0.10</b> | 0.82956 |
| STM1459   | STM1459 | Na(+)-translocating NADH-quinone reductase subunit E | <b>-0.07</b> | 0.89863 |
| STM1460   | ydgK    | putative inner membrane protein                      | <b>-0.05</b> | 0.93076 |
| STM1460   | ydgK    | putative inner membrane protein                      | <b>-0.19</b> | 0.65312 |
| STM1461,S | ydgT    | putative cytoplasmic protein                         | <b>-0.29</b> | 0.52258 |
| STM1461,S | ydgT    | putative cytoplasmic protein                         | <b>-0.04</b> | 0.91900 |
| STM1462,S | ydgJ    | putative oxidoreductase                              | <b>-0.07</b> | 0.86876 |
| STM1462,S | ydgJ    | putative oxidoreductase                              | <b>0.55</b>  | 0.17139 |
| STM1463   | add     | adenosine deaminase                                  | <b>-0.11</b> | 0.79354 |
| STM1463   | add     | adenosine deaminase                                  | <b>0.06</b>  | 0.89979 |
| STM1466   | ydgA    | putative periplasmic protein                         | <b>-0.04</b> | 0.91571 |
| STM1466   | ydgA    | putative periplasmic protein                         | <b>0.09</b>  | 0.83625 |
| STM1467   | manA    | mannose-6-phosphate isomerase                        | <b>0.18</b>  | 0.64786 |
| STM1467   | manA    | mannose-6-phosphate isomerase                        | <b>0.20</b>  | 0.61833 |
| STM1468   | fumA    | fumarase A                                           | <b>0.19</b>  | 0.67979 |
| STM1468   | fumA    | fumarase A                                           | <b>0.33</b>  | 0.56421 |
| STM1469   | fumC    | fumarate hydratase                                   | <b>0.31</b>  | 0.80045 |
| STM1469   | fumC    | fumarate hydratase                                   | <b>0.38</b>  | 0.62199 |
| STM1470   | tus     | DNA replication terminus site-binding protein        | <b>0.29</b>  | 0.61190 |
| STM1470   | tus     | DNA replication terminus site-binding protein        | <b>0.50</b>  | 0.24515 |
| STM1471   | rstB    | sensory histidine kinase                             | <b>-0.13</b> | 0.91170 |
| STM1471   | rstB    | sensory histidine kinase                             | <b>0.76</b>  | 0.41836 |
| STM1472   | STM1472 | putative periplasmic protein                         | <b>-0.39</b> | 0.46376 |
| STM1472   | STM1472 | putative periplasmic protein                         | <b>0.01</b>  | 0.99213 |
| STM1473   | ompN    | outer membrane protein N precursor                   | <b>1.40</b>  | 0.38389 |
| STM1473   | ompN    | outer membrane protein N precursor                   | <b>0.73</b>  | 0.54624 |
| STM1475   | rstA    | response regulator                                   | <b>-1.10</b> | 0.04499 |
| STM1475   | rstA    | response regulator                                   | <b>-0.86</b> | 0.11224 |
| STM1476   | ydgC    | putative inner membrane protein                      | <b>-0.05</b> | 0.90534 |
| STM1476   | ydgC    | putative inner membrane protein                      | <b>-0.14</b> | 0.79356 |
| STM1477   | ydgl    | putative amino acid transporter                      | <b>-0.50</b> | 0.29866 |
| STM1477   | ydgl    | putative amino acid transporter                      | <b>-0.35</b> | 0.41715 |
| STM1478   | ydgH    | putative periplasmic protein                         | <b>-0.51</b> | 0.23853 |
| STM1478   | ydgH    | putative periplasmic protein                         | <b>-0.36</b> | 0.45852 |
| STM1479   | pntA    | NAD(P) transhydrogenase subunit alpha                | <b>-0.28</b> | 0.46101 |
| STM1479   | pntA    | NAD(P) transhydrogenase subunit alpha                | <b>-0.06</b> | 0.89624 |
| STM1480   | pntB    | pyridine nucleotide transhydrogenase                 | <b>-0.27</b> | 0.53840 |
| STM1480   | pntB    | pyridine nucleotide transhydrogenase                 | <b>0.30</b>  | 0.49009 |
| STM1481   | STM1481 | putative transport protein                           | <b>-0.46</b> | 0.23114 |
| STM1481   | STM1481 | putative transport protein                           | <b>-0.12</b> | 0.84187 |
| STM1482   | ydgF    | putative cationic transporter                        | <b>-0.37</b> | 0.51979 |
| STM1482   | ydgF    | putative cationic transporter                        | <b>0.31</b>  | 0.36270 |
| STM1483   | ydgE    | putative cationic transporter                        | <b>-0.68</b> | 0.28582 |
| STM1483   | ydgE    | putative cationic transporter                        | <b>0.00</b>  | 0.99698 |
| STM1484   | STM1484 | putative protease                                    | <b>-0.11</b> | 0.80652 |
| STM1484   | STM1484 | putative protease                                    | <b>-0.07</b> | 0.89405 |

|           |         |                                                       |              |         |
|-----------|---------|-------------------------------------------------------|--------------|---------|
| STM1486   | ynfM    | putative transport protein                            | <b>0.27</b>  | 0.55956 |
| STM1486   | ynfM    | putative transport protein                            | <b>0.19</b>  | 0.66155 |
| STM1487   | ynfL    | putative transcriptional regulator                    | <b>-0.34</b> | 0.49035 |
| STM1487   | ynfL    | putative transcriptional regulator                    | <b>0.12</b>  | 0.78728 |
| STM1488   | mlc     | pts operon transcriptional repressor                  | <b>-0.18</b> | 0.69519 |
| STM1488   | mlc     | pts operon transcriptional repressor                  | <b>0.06</b>  | 0.94990 |
| STM1489   | bioD    | dithiobiotin synthetase                               | <b>0.08</b>  | 0.90292 |
| STM1489   | bioD    | dithiobiotin synthetase                               | <b>0.16</b>  | 0.65305 |
| STM1490   | STM1490 | putative voltage-gated ClC-type chloride channel ClcB | <b>-0.27</b> | 0.54624 |
| STM1490   | STM1490 | putative voltage-gated ClC-type chloride channel ClcB | <b>0.42</b>  | 0.45800 |
| STM1491   | STM1491 | proline/glycine betaine transport systems             | <b>-0.08</b> | 0.91900 |
| STM1491   | STM1491 | proline/glycine betaine transport systems             | <b>0.76</b>  | 0.27477 |
| STM1492   | STM1492 | putative ABC transporter permease component           | <b>-0.03</b> | 0.98156 |
| STM1492   | STM1492 | putative ABC transporter permease component           | <b>0.36</b>  | 0.49077 |
| STM1493   | STM1493 | putative ABC transporter periplasmic component        | <b>0.26</b>  | 0.64730 |
| STM1493   | STM1493 | putative ABC transporter periplasmic component        | <b>1.59</b>  | 0.08996 |
| STM1494   | STM1494 | putative transport system permease component          | <b>-0.13</b> | 0.78410 |
| STM1494   | STM1494 | putative transport system permease component          | <b>0.93</b>  | 0.21015 |
| STM1495   | ynfI    | putative anaerobic dehydrogenase component            | <b>-0.16</b> | 0.74779 |
| STM1495   | ynfI    | putative anaerobic dehydrogenase component            | <b>-0.40</b> | 0.41715 |
| STM1496   | STM1496 | putative dimethylsulfoxide reductase                  | <b>-0.39</b> | 0.48814 |
| STM1496   | STM1496 | putative dimethylsulfoxide reductase                  | <b>-0.32</b> | 0.44935 |
| STM1497   | STM1497 | putative dimethyl sulphoxide reductase                | <b>-0.40</b> | 0.65383 |
| STM1497   | STM1497 | putative dimethyl sulphoxide reductase                | <b>0.22</b>  | 0.76387 |
| STM1498   | STM1498 | putative dimethyl sulphoxide reductase                | <b>-0.33</b> | 0.36341 |
| STM1498   | STM1498 | putative dimethyl sulphoxide reductase                | <b>-0.07</b> | 0.85909 |
| STM1499   | STM1499 | putative dimethyl sulphoxide reductase chain A1       | <b>-1.32</b> | 0.24313 |
| STM1499   | STM1499 | putative dimethyl sulphoxide reductase chain A1       | <b>-0.43</b> | 0.66743 |
| STM1500   | ynfD    | putative outer membrane protein                       | <b>-0.57</b> | 0.25759 |
| STM1500   | ynfD    | putative outer membrane protein                       | <b>0.44</b>  | 0.49983 |
| STM1501   | ynfC    | hypothetical protein STM1501                          | <b>0.13</b>  | 0.78665 |
| STM1501   | ynfC    | hypothetical protein STM1501                          | <b>0.00</b>  | 0.99713 |
| STM1502   | speG    | spermidine N1-acetyltransferase                       | <b>-0.12</b> | 0.81075 |
| STM1502   | speG    | spermidine N1-acetyltransferase                       | <b>0.32</b>  | 0.60174 |
| STM1503   | ynfB    | putative periplasmic protein                          | <b>-0.25</b> | 0.57506 |
| STM1503   | ynfB    | putative periplasmic protein                          | <b>0.08</b>  | 0.89405 |
| STM1504   | ynfA    | hypothetical protein STM1504                          | <b>0.18</b>  | 0.72135 |
| STM1504   | ynfA    | hypothetical protein STM1504                          | <b>0.47</b>  | 0.32481 |
| STM1505   | rspA    | putative dehydratase                                  | <b>-0.13</b> | 0.84187 |
| STM1505   | rspA    | putative dehydratase                                  | <b>0.52</b>  | 0.43219 |
| STM1506   | rspB    | putative dehydrogenase                                | <b>-0.23</b> | 0.63793 |
| STM1506   | rspB    | putative dehydrogenase                                | <b>0.47</b>  | 0.42756 |
| STM1508   | ydfI    | putative mannitol dehydrogenase                       | <b>-0.29</b> | 0.53840 |
| STM1508   | ydfI    | putative mannitol dehydrogenase                       | <b>1.20</b>  | 0.11913 |
| STM1510   | ydfH    | putative regulatory protein                           | <b>0.21</b>  | 0.81667 |
| STM1510   | ydfH    | putative regulatory protein                           | <b>0.19</b>  | 0.83525 |
| STM1511   | ydfG    | putative oxidoreductase                               | <b>-0.21</b> | 0.63328 |
| STM1511   | ydfG    | putative oxidoreductase                               | <b>-0.38</b> | 0.44224 |
| STM1512   | dcp     | dipeptidyl carboxypeptidase II                        | <b>-0.71</b> | 0.13813 |
| STM1512   | dcp     | dipeptidyl carboxypeptidase II                        | <b>-0.44</b> | 0.22602 |
| STM1514   | ydeJ    | competence damage-inducible protein A                 | <b>0.12</b>  | 0.84863 |
| STM1514   | ydeJ    | competence damage-inducible protein A                 | <b>0.40</b>  | 0.36989 |
| STM1515   | ydeI    | putative periplasmic protein                          | <b>-0.62</b> | 0.21015 |
| STM1515   | ydeI    | putative periplasmic protein                          | <b>-0.32</b> | 0.79121 |
| STM1516   | ydeE    | putative transport protein                            | <b>-0.14</b> | 0.78929 |
| STM1516   | ydeE    | putative transport protein                            | <b>0.06</b>  | 0.92716 |
| STM1517   | ydeD    | putative permease                                     | <b>-0.13</b> | 0.76622 |
| STM1517   | ydeD    | putative permease                                     | <b>0.35</b>  | 0.38358 |
| STM1518   | marB    | multiple antibiotic resistance protein                | <b>-0.86</b> | 0.16534 |
| STM1518   | marB    | multiple antibiotic resistance protein                | <b>-0.39</b> | 0.55009 |
| STM1519,S | marA    | transcriptional activator                             | <b>-0.39</b> | 0.55956 |
| STM1519,S | marA    | transcriptional activator                             | <b>0.28</b>  | 0.62975 |
| STM1520   | marR    | marRAB operon repressor                               | <b>-0.04</b> | 0.94417 |

|            |            |                                                                 |              |         |
|------------|------------|-----------------------------------------------------------------|--------------|---------|
| STM1520    | marR       | marRAB operon repressor                                         | <b>0.03</b>  | 0.95608 |
| STM1521    | marC       | multiple antibiotic resistance transporter                      | <b>-0.73</b> | 0.17139 |
| STM1521    | marC       | multiple antibiotic resistance transporter                      | <b>-0.22</b> | 0.66888 |
| STM1522    | ydeA       | sugar efflux transporter                                        | <b>-0.02</b> | 0.98080 |
| STM1522    | ydeA       | sugar efflux transporter                                        | <b>0.04</b>  | 0.96595 |
| STM1523    | yneJ       | putative transcriptional regulator                              | <b>-0.57</b> | 0.20065 |
| STM1523    | yneJ       | putative transcriptional regulator                              | <b>0.50</b>  | 0.57111 |
| STM1524    | ynel       | putative succinate-semialdehyde dehydrogenase                   | <b>-0.34</b> | 0.53731 |
| STM1524    | ynel       | putative succinate-semialdehyde dehydrogenase                   | <b>-0.01</b> | 0.98879 |
| STM1525    | yneH       | glutaminase                                                     | <b>0.18</b>  | 0.70726 |
| STM1525    | yneH       | glutaminase                                                     | <b>0.38</b>  | 0.47159 |
| STM1526    | yneG       | putative cytoplasmic protein                                    | <b>0.06</b>  | 0.93849 |
| STM1526    | yneG       | putative cytoplasmic protein                                    | <b>-0.24</b> | 0.55374 |
| STM1527    | STM1527    | putative inner membrane protein                                 | <b>-0.20</b> | 0.67137 |
| STM1527    | STM1527    | putative inner membrane protein                                 | <b>0.00</b>  | 0.99698 |
| STM1528    | STM1528    | putative outer membrane protein                                 | <b>0.18</b>  | 0.66636 |
| STM1528    | STM1528    | putative outer membrane protein                                 | <b>0.19</b>  | 0.70686 |
| STM1530    | STM1530    | putative outer membrane protein                                 | <b>-0.12</b> | 0.77908 |
| STM1530    | STM1530    | putative outer membrane protein                                 | <b>0.87</b>  | 0.14030 |
| STM1531    | STM1531    | putative hydrogenase                                            | <b>-1.09</b> | 0.07318 |
| STM1531    | STM1531    | putative hydrogenase                                            | <b>0.29</b>  | 0.59811 |
| STM1532    | STM1532    | putative dehydrogenase protein                                  | <b>-0.26</b> | 0.62199 |
| STM1532    | STM1532    | putative dehydrogenase protein                                  | <b>-0.23</b> | 0.70061 |
| STM1533    | STM1533    | putative hydrogenase                                            | <b>-0.09</b> | 0.83400 |
| STM1533    | STM1533    | putative hydrogenase                                            | <b>-0.18</b> | 0.75893 |
| STM1534    | STM1534    | putative hydrogenase                                            | <b>-0.16</b> | 0.75739 |
| STM1534    | STM1534    | putative hydrogenase                                            | <b>0.62</b>  | 0.22602 |
| STM1535    | STM1535    | putative hydrogenase protein                                    | <b>-0.66</b> | 0.27783 |
| STM1535    | STM1535    | putative hydrogenase protein                                    | <b>-0.53</b> | 0.38317 |
| STM1536    | STM1536    | putative hydrogenase maturation protease                        | <b>-0.40</b> | 0.35536 |
| STM1536    | STM1536    | putative hydrogenase maturation protease                        | <b>0.09</b>  | 0.85356 |
| STM1537    | STM1537    | putative Ni/Fe hydrogenase 1 b-type cytochrome subunit          | <b>-0.68</b> | 0.20285 |
| STM1537    | STM1537    | putative Ni/Fe hydrogenase 1 b-type cytochrome subunit          | <b>0.41</b>  | 0.49870 |
| STM1538    | STM1538    | putative hydrogenase-1 large subunit                            | <b>0.96</b>  | 0.19425 |
| STM1538    | STM1538    | putative hydrogenase-1 large subunit                            | <b>1.19</b>  | 0.18961 |
| STM1539    | STM1539    | putative hydrogenase-1 small subunit                            | <b>-0.49</b> | 0.33839 |
| STM1539    | STM1539    | putative hydrogenase-1 small subunit                            | <b>0.91</b>  | 0.17754 |
| STM1540    | STM1540    | putative hydrolase                                              | <b>-0.55</b> | 0.24520 |
| STM1540    | STM1540    | putative hydrolase                                              | <b>0.20</b>  | 0.62199 |
| STM1541    | STM1541    | putative regulatory protein                                     | <b>-0.13</b> | 0.84611 |
| STM1541    | STM1541    | putative regulatory protein                                     | <b>0.24</b>  | 0.68143 |
| STM1542    | STM1542    | putative zinc-binding dehydrogenase                             | <b>-0.60</b> | 0.22131 |
| STM1542    | STM1542    | putative zinc-binding dehydrogenase                             | <b>0.01</b>  | 0.99200 |
| STM1543    | STM1543    | putative transport protein                                      | <b>-0.13</b> | 0.86396 |
| STM1543    | STM1543    | putative transport protein                                      | <b>0.26</b>  | 0.67509 |
| STM1544    | pqaA       | PhoPQ-regulated protein                                         | <b>-0.22</b> | 0.76970 |
| STM1544    | pqaA       | PhoPQ-regulated protein                                         | <b>0.74</b>  | 0.22063 |
| STM1545    | STM1545    | putative multidrug efflux protein                               | <b>-0.92</b> | 0.21812 |
| STM1545    | STM1545    | putative multidrug efflux protein                               | <b>-0.35</b> | 0.58300 |
| STM1546    | STM1546    | hypothetical protein STM1546                                    | <b>0.04</b>  | 0.95809 |
| STM1546    | STM1546    | hypothetical protein STM1546                                    | <b>-0.51</b> | 0.38260 |
| STM1547    | STM1547    | putative transcriptional regulator                              | <b>-0.20</b> | 0.73757 |
| STM1547    | STM1547    | putative transcriptional regulator                              | <b>-0.01</b> | 0.98445 |
| STM1548,s  | STM1548,s  | putative S-adenosylmethionine/tRNA-ribosyltransferase-isomerase | <b>-0.53</b> | 0.29889 |
| STM1548,s  | STM1548,s  | putative S-adenosylmethionine/tRNA-ribosyltransferase-isomerase | <b>-0.17</b> | 0.74178 |
| STM1549    | STM1549    | putative translation initiation inhibitor                       | <b>-0.07</b> | 0.89542 |
| STM1549    | STM1549    | putative translation initiation inhibitor                       | <b>0.26</b>  | 0.54916 |
| STM1551    | STM1551    | putative cytoplasmic protein                                    | <b>-0.27</b> | 0.59306 |
| STM1551    | STM1551    | putative cytoplasmic protein                                    | <b>0.17</b>  | 0.68307 |
| STM1551,1n | STM1551,1n | hypothetical protein STM1551,1n                                 | <b>-0.24</b> | 0.55956 |
| STM1551,1n | STM1551,1n | hypothetical protein STM1551,1n                                 | <b>-0.04</b> | 0.96687 |

|            |            |                                                     |              |         |
|------------|------------|-----------------------------------------------------|--------------|---------|
| STM1552    | STM1552    | putative cytoplasmic protein                        | <b>0.07</b>  | 0.92876 |
| STM1552    | STM1552    | putative cytoplasmic protein                        | <b>-0.03</b> | 0.96426 |
| STM1554    | STM1554    | putative coiled-coil protein                        | <b>-0.46</b> | 0.40499 |
| STM1554    | STM1554    | putative coiled-coil protein                        | <b>0.37</b>  | 0.40819 |
| STM1555    | STM1555    | putative transcriptional regulator                  | <b>-0.32</b> | 0.56200 |
| STM1555    | STM1555    | putative transcriptional regulator                  | <b>-0.23</b> | 0.72629 |
| STM1556    | STM1556    | putative Na <sup>+</sup> /H <sup>+</sup> antiporter | <b>-0.75</b> | 0.17431 |
| STM1556    | STM1556    | putative Na <sup>+</sup> /H <sup>+</sup> antiporter | <b>-0.02</b> | 0.98385 |
| STM1557    | STM1557    | putative aminotransferase                           | <b>-0.57</b> | 0.35824 |
| STM1557    | STM1557    | putative aminotransferase                           | <b>0.43</b>  | 0.60249 |
| STM1558    | STM1558    | putative glycosyl hydrolase                         | <b>0.03</b>  | 0.96774 |
| STM1558    | STM1558    | putative glycosyl hydrolase                         | <b>1.09</b>  | 0.11913 |
| STM1559    | STM1559    | putative glycosyl hydrolase                         | <b>0.55</b>  | 0.41137 |
| STM1559    | STM1559    | putative glycosyl hydrolase                         | <b>1.11</b>  | 0.22540 |
| STM1560    | STM1560    | putative alpha amylase                              | <b>-0.21</b> | 0.76648 |
| STM1560    | STM1560    | putative alpha amylase                              | <b>0.14</b>  | 0.76553 |
| STM1561    | STM1561    | putative lipoprotein                                | <b>-0.29</b> | 0.77963 |
| STM1561    | STM1561    | putative lipoprotein                                | <b>0.60</b>  | 0.55008 |
| STM1562    | STM1562    | putative periplasmic transport protein              | <b>-0.40</b> | 0.40595 |
| STM1562    | STM1562    | putative periplasmic transport protein              | <b>0.77</b>  | 0.13645 |
| STM1563    | osmC       | putative envelope protein                           | <b>-0.36</b> | 0.49986 |
| STM1563    | osmC       | putative envelope protein                           | <b>-0.03</b> | 0.96630 |
| STM1564    | yddX       | putative cytoplasmic protein                        | <b>-0.76</b> | 0.13645 |
| STM1564    | yddX       | putative cytoplasmic protein                        | <b>0.35</b>  | 0.52101 |
| STM1565    | rpsV       | 30S ribosomal subunit protein S22                   | <b>0.06</b>  | 0.92478 |
| STM1565    | rpsV       | 30S ribosomal subunit protein S22                   | <b>0.72</b>  | 0.34070 |
| STM1566    | sfcA       | NAD-linked malate dehydrogenase                     | <b>0.11</b>  | 0.80047 |
| STM1566    | sfcA       | NAD-linked malate dehydrogenase                     | <b>0.96</b>  | 0.24568 |
| STM1567    | adhP       | alcohol dehydrogenase                               | <b>-0.33</b> | 0.36162 |
| STM1567    | adhP       | alcohol dehydrogenase                               | <b>0.85</b>  | 0.13813 |
| STM1568    | fdnI       | formate dehydrogenase-N gamma subunit               | <b>-0.15</b> | 0.68032 |
| STM1568    | fdnI       | formate dehydrogenase-N gamma subunit               | <b>0.91</b>  | 0.16281 |
| STM1569    | fdnH       | formate dehydrogenase-N beta subunit                | <b>-0.18</b> | 0.80275 |
| STM1569    | fdnH       | formate dehydrogenase-N beta subunit                | <b>0.34</b>  | 0.36444 |
| STM1570    | fdnG       | formate dehydrogenase-N alpha subunit               | <b>0.33</b>  | 0.39315 |
| STM1570    | fdnG       | formate dehydrogenase-N alpha subunit               | <b>0.65</b>  | 0.31305 |
| STM1571    | yddG       | putative permease                                   | <b>0.25</b>  | 0.50801 |
| STM1571    | yddG       | putative permease                                   | <b>0.19</b>  | 0.68583 |
| STM1572    | nmpC       | putative outer membrane porin precursor             | <b>0.25</b>  | 0.58445 |
| STM1572    | nmpC       | putative outer membrane porin precursor             | <b>0.18</b>  | 0.67220 |
| STM1573,Sc | STM1573,Sc | putative cytoplasmic protein                        | <b>-0.09</b> | 0.91170 |
| STM1573,Sc | STM1573,Sc | putative cytoplasmic protein                        | <b>0.31</b>  | 0.52777 |
| STM1574    | smvA       | methyl viologen resistance                          | <b>-0.21</b> | 0.58108 |
| STM1574    | smvA       | methyl viologen resistance                          | <b>0.03</b>  | 0.96785 |
| STM1575    | STM1575    | putative transcriptional regulator                  | <b>-0.19</b> | 0.68450 |
| STM1575    | STM1575    | putative transcriptional regulator                  | <b>0.00</b>  | 0.99698 |
| STM1576    | narU       | nitrate extrusion protein                           | <b>-0.21</b> | 0.65916 |
| STM1576    | narU       | nitrate extrusion protein                           | <b>0.13</b>  | 0.79988 |
| STM1577    | narZ       | nitrate reductase 2 alpha subunit                   | <b>-0.42</b> | 0.34051 |
| STM1577    | narZ       | nitrate reductase 2 alpha subunit                   | <b>0.93</b>  | 0.17431 |
| STM1578    | narY       | nitrate reductase 2 beta subunit                    | <b>-0.35</b> | 0.87655 |
| STM1578    | narY       | nitrate reductase 2 beta subunit                    | <b>0.87</b>  | 0.62199 |
| STM1579    | narW       | nitrate reductase 2 delta subunit                   | <b>0.10</b>  | 0.92529 |
| STM1579    | narW       | nitrate reductase 2 delta subunit                   | <b>-0.02</b> | 0.98090 |
| STM1580    | narV       | nitrate reductase 2 gamma subunit                   | <b>0.05</b>  | 0.93083 |
| STM1580    | narV       | nitrate reductase 2 gamma subunit                   | <b>1.19</b>  | 0.18763 |
| STM1581    | yddE       | putative phenazine biosynthetic protein             | <b>0.33</b>  | 0.46629 |
| STM1581    | yddE       | putative phenazine biosynthetic protein             | <b>0.57</b>  | 0.26535 |
| STM1582    | nhoA       | putative arylamine N-acetyltransferase              | <b>0.04</b>  | 0.93174 |
| STM1582    | nhoA       | putative arylamine N-acetyltransferase              | <b>0.42</b>  | 0.44768 |
| STM1583    | STM1583    | putative cytoplasmic protein                        | <b>-0.04</b> | 0.96785 |
| STM1583    | STM1583    | putative cytoplasmic protein                        | <b>0.76</b>  | 0.51446 |
| STM1584    | ansP       | L-asparagine transport protein                      | <b>-0.15</b> | 0.81325 |

|         |         |                                                                    |              |         |
|---------|---------|--------------------------------------------------------------------|--------------|---------|
| STM1584 | ansP    | L-asparagine transport protein                                     | <b>-0.27</b> | 0.47610 |
| STM1585 | STM1585 | putative outer membrane lipoprotein                                | <b>-0.70</b> | 0.16534 |
| STM1585 | STM1585 | putative outer membrane lipoprotein                                | <b>0.37</b>  | 0.54332 |
| STM1586 | STM1586 | putative periplasmic protein                                       | <b>-0.12</b> | 0.88568 |
| STM1586 | STM1586 | putative periplasmic protein                                       | <b>0.79</b>  | 0.11421 |
| STM1587 | yncD    | putative outer membrane receptor                                   | <b>-0.19</b> | 0.66677 |
| STM1587 | yncD    | putative outer membrane receptor                                   | <b>-0.14</b> | 0.77745 |
| STM1588 | yncC    | putative regulatory protein                                        | <b>-0.24</b> | 0.48126 |
| STM1588 | yncC    | putative regulatory protein                                        | <b>0.32</b>  | 0.40819 |
| STM1589 | yncB    | putative NADP-dependent oxidoreductase                             | <b>-0.35</b> | 0.69914 |
| STM1589 | yncB    | putative NADP-dependent oxidoreductase                             | <b>0.34</b>  | 0.54461 |
| STM1590 | yncA    | putative acyltransferase                                           | <b>-0.39</b> | 0.41996 |
| STM1590 | yncA    | putative acyltransferase                                           | <b>0.03</b>  | 0.96251 |
| STM1591 | ycdZ    | putative inner membrane protein                                    | <b>-0.11</b> | 0.80406 |
| STM1591 | ycdZ    | putative inner membrane protein                                    | <b>-0.21</b> | 0.67551 |
| STM1592 | ycdY    | putative cytoplasmic protein                                       | <b>0.58</b>  | 0.58182 |
| STM1592 | ycdY    | putative cytoplasmic protein                                       | <b>1.39</b>  | 0.36243 |
| STM1593 | srfA    | putative virulence protein                                         | <b>-0.09</b> | 0.86654 |
| STM1593 | srfA    | putative virulence protein                                         | <b>0.34</b>  | 0.40940 |
| STM1594 | srfB    | putative virulence protein                                         | <b>0.08</b>  | 0.84844 |
| STM1594 | srfB    | putative virulence protein                                         | <b>0.55</b>  | 0.24005 |
| STM1595 | srfC    | putative virulence protein                                         | <b>-0.29</b> | 0.61201 |
| STM1595 | srfC    | putative virulence protein                                         | <b>0.28</b>  | 0.60548 |
| STM1596 | ycdX    | putative inner membrane protein                                    | <b>-0.15</b> | 0.80038 |
| STM1596 | ycdX    | putative inner membrane protein                                    | <b>-0.14</b> | 0.80093 |
| STM1597 | ycdW    | putative aldehyde dehydrogenase                                    | <b>-0.61</b> | 0.19142 |
| STM1597 | ycdW    | putative aldehyde dehydrogenase                                    | <b>0.38</b>  | 0.40947 |
| STM1598 | ycdR    | putative regulatory protein                                        | <b>-0.56</b> | 0.35955 |
| STM1598 | ycdR    | putative regulatory protein                                        | <b>0.01</b>  | 0.98718 |
| STM1599 | pdgL    | periplasmic dipeptidase precursor                                  | <b>-0.38</b> | 0.53827 |
| STM1599 | pdgL    | periplasmic dipeptidase precursor                                  | <b>-0.12</b> | 0.83918 |
| STM1601 | ugtL    | hypothetical protein STM1601                                       | <b>-0.14</b> | 0.79180 |
| STM1601 | ugtL    | hypothetical protein STM1601                                       | <b>0.20</b>  | 0.83443 |
| STM1602 | sifB    | secreted effector protein                                          | <b>-0.98</b> | 0.17041 |
| STM1602 | sifB    | secreted effector protein                                          | <b>-0.17</b> | 0.79319 |
| STM1603 | yncJ    | putative periplasmic protein                                       | <b>-0.59</b> | 0.26910 |
| STM1603 | yncJ    | putative periplasmic protein                                       | <b>-0.18</b> | 0.63196 |
| STM1604 | ycdP    | putative collagenase                                               | <b>0.00</b>  | 0.99432 |
| STM1604 | ycdP    | putative collagenase                                               | <b>0.21</b>  | 0.72092 |
| STM1605 | ycdN    | putative repressor                                                 | <b>-0.06</b> | 0.89611 |
| STM1605 | ycdN    | putative repressor                                                 | <b>0.32</b>  | 0.44402 |
| STM1606 | STM1606 | putative benzoate membrane transport protein                       | <b>0.07</b>  | 0.87924 |
| STM1606 | STM1606 | putative benzoate membrane transport protein                       | <b>0.08</b>  | 0.83718 |
| STM1607 | STM1607 | putative outer membrane lipoprotein                                | <b>-0.77</b> | 0.28406 |
| STM1607 | STM1607 | putative outer membrane lipoprotein                                | <b>-0.08</b> | 0.86385 |
| STM1608 | tehB    | putative methyltransferase                                         | <b>-0.15</b> | 0.70417 |
| STM1608 | tehB    | putative methyltransferase                                         | <b>0.22</b>  | 0.64456 |
| STM1609 | tehA    | K <sup>+</sup> -tellurite ethidium and proflavin transport protein | <b>-0.05</b> | 0.91571 |
| STM1609 | tehA    | K <sup>+</sup> -tellurite ethidium and proflavin transport protein | <b>0.40</b>  | 0.48429 |
| STM1610 | ycdK    | putative nucleoside-diphosphate-sugar                              |              |         |
| STM1610 | ycdK    | pyrophosphorylase                                                  | <b>-1.40</b> | 0.11913 |
| STM1610 | ycdK    | putative nucleoside-diphosphate-sugar                              |              |         |
| STM1610 | ycdK    | pyrophosphorylase                                                  | <b>-0.28</b> | 0.72001 |
| STM1611 | rimL    | acetyl transferase                                                 | <b>0.10</b>  | 0.82159 |
| STM1611 | rimL    | acetyl transferase                                                 | <b>0.31</b>  | 0.65974 |
| STM1612 | STM1612 | putative cellulase protein                                         | <b>-0.22</b> | 0.74585 |
| STM1612 | STM1612 | putative cellulase protein                                         | <b>-0.32</b> | 0.62757 |
| STM1613 | STM1613 | putative PTS system enzyme IIB component                           | <b>-0.75</b> | 0.18634 |
| STM1613 | STM1613 | putative PTS system enzyme IIB component                           | <b>-0.60</b> | 0.25360 |
| STM1614 | STM1614 | putative PTS system enzyme IIC component                           | <b>-0.31</b> | 0.48814 |
| STM1614 | STM1614 | putative PTS system enzyme IIC component                           | <b>0.06</b>  | 0.93228 |
| STM1615 | STM1615 | putative nucleoside triphosphatase                                 | <b>-0.20</b> | 0.64365 |
| STM1615 | STM1615 | putative nucleoside triphosphatase                                 | <b>-0.07</b> | 0.93881 |

|         |         |                                                     |              |         |
|---------|---------|-----------------------------------------------------|--------------|---------|
| STM1616 | STM1616 | putative sugar-specific PTS enzyme II               | <b>-0.08</b> | 0.83718 |
| STM1616 | STM1616 | putative sugar-specific PTS enzyme II               | <b>0.48</b>  | 0.23631 |
| STM1617 | STM1617 | ribulose-phosphate 3-epimerase                      | <b>0.75</b>  | 0.60453 |
| STM1617 | STM1617 | ribulose-phosphate 3-epimerase                      | <b>0.95</b>  | 0.32481 |
| STM1618 | STM1618 | putative transcriptional repressor of sgc operon    | <b>-0.35</b> | 0.57442 |
| STM1618 | STM1618 | putative transcriptional repressor of sgc operon    | <b>0.10</b>  | 0.90054 |
| STM1619 | STM1619 | cryptic aminoglycoside resistance gene              | <b>0.13</b>  | 0.88647 |
| STM1619 | STM1619 | cryptic aminoglycoside resistance gene              | <b>0.52</b>  | 0.31242 |
| STM1620 | STM1620 | putative oxidase                                    | <b>-1.02</b> | 0.15859 |
| STM1620 | STM1620 | putative oxidase                                    | <b>-0.20</b> | 0.83899 |
| STM1621 | STM1621 | putative periplasmic protein                        | <b>-0.46</b> | 0.45188 |
| STM1621 | STM1621 | putative periplasmic protein                        | <b>0.20</b>  | 0.81806 |
| STM1622 | ydcG    | putative MDO biosynthetic protein                   | <b>-0.18</b> | 0.62312 |
| STM1622 | ydcG    | putative MDO biosynthetic protein                   | <b>-0.18</b> | 0.68240 |
| STM1623 | STM1623 | putative carboxylesterase                           | <b>0.18</b>  | 0.61597 |
| STM1623 | STM1623 | putative carboxylesterase                           | <b>0.27</b>  | 0.57233 |
| STM1624 | STM1624 | putative cytoplasmic protein                        | <b>-0.37</b> | 0.37161 |
| STM1624 | STM1624 | putative cytoplasmic protein                        | <b>0.24</b>  | 0.65305 |
| STM1625 | ydcI    | putative transcriptional regulator                  | <b>0.26</b>  | 0.52208 |
| STM1625 | ydcI    | putative transcriptional regulator                  | <b>1.01</b>  | 0.09135 |
| STM1626 | trg     | methyl-accepting chemotaxis protein III             | <b>0.47</b>  | 0.38080 |
| STM1626 | trg     | methyl-accepting chemotaxis protein III             | <b>0.46</b>  | 0.28655 |
| STM1627 | STM1627 | alcohol dehydrogenase class III                     | <b>0.10</b>  | 0.83832 |
| STM1627 | STM1627 | alcohol dehydrogenase class III                     | <b>0.09</b>  | 0.90399 |
| STM1628 | STM1628 | putative cytoplasmic protein                        | <b>0.11</b>  | 0.81667 |
| STM1628 | STM1628 | putative cytoplasmic protein                        | <b>0.20</b>  | 0.66636 |
| STM1630 | STM1630 | putative inner membrane protein                     | <b>0.01</b>  | 0.99452 |
| STM1630 | STM1630 | putative inner membrane protein                     | <b>0.50</b>  | 0.61892 |
| STM1631 | sseJ    | secreted effector protein                           | <b>0.32</b>  | 0.70474 |
| STM1631 | sseJ    | secreted effector protein                           | <b>1.30</b>  | 0.31344 |
| STM1632 | STM1632 | putative inner membrane protein                     | <b>-0.67</b> | 0.20791 |
| STM1632 | STM1632 | putative inner membrane protein                     | <b>0.14</b>  | 0.82644 |
| STM1633 | STM1633 | putative periplasmic binding protein                | <b>-0.50</b> | 0.26261 |
| STM1633 | STM1633 | putative periplasmic binding protein                | <b>-0.07</b> | 0.89730 |
| STM1634 | STM1634 | putative ABC transporter permease component         | <b>-0.18</b> | 0.75552 |
| STM1634 | STM1634 | putative ABC transporter permease component         | <b>0.09</b>  | 0.86370 |
|         |         | putative ABC-type polar amino acid transport system |              |         |
| STM1635 | STM1635 | ATPase                                              | <b>-0.01</b> | 0.99381 |
|         |         | putative ABC-type polar amino acid transport system |              |         |
| STM1635 | STM1635 | ATPase                                              | <b>0.58</b>  | 0.29871 |
|         |         | putative ABC-type transport system membrane         |              |         |
| STM1636 | STM1636 | component                                           | <b>-0.21</b> | 0.68444 |
|         |         | putative ABC-type transport system membrane         |              |         |
| STM1636 | STM1636 | component                                           | <b>0.08</b>  | 0.91193 |
| STM1637 | STM1637 | putative inner membrane protein                     | <b>-0.52</b> | 0.33452 |
| STM1637 | STM1637 | putative inner membrane protein                     | <b>0.19</b>  | 0.76610 |
| STM1638 | STM1638 | putative SAM-dependent methyltransferase            | <b>-0.08</b> | 0.86199 |
| STM1638 | STM1638 | putative SAM-dependent methyltransferase            | <b>0.35</b>  | 0.45800 |
| STM1639 | cybB    | cytochrome b561                                     | <b>0.04</b>  | 0.93688 |
| STM1639 | cybB    | cytochrome b561                                     | <b>0.14</b>  | 0.72040 |
| STM1640 | ydcF    | putative inner membrane protein                     | <b>0.00</b>  | 0.99822 |
| STM1640 | ydcF    | putative inner membrane protein                     | <b>0.27</b>  | 0.46629 |
| STM1641 | hrpA    | ATP-dependent helicase                              | <b>-0.26</b> | 0.54625 |
| STM1641 | hrpA    | ATP-dependent helicase                              | <b>0.14</b>  | 0.78929 |
| STM1642 | acpD    | acyl carrier protein phosphodiesterase              | <b>-0.03</b> | 0.96559 |
| STM1642 | acpD    | acyl carrier protein phosphodiesterase              | <b>0.05</b>  | 0.92311 |
| STM1643 | STM1643 | putative inner membrane protein                     | <b>-0.57</b> | 0.17754 |
| STM1643 | STM1643 | putative inner membrane protein                     | <b>-0.28</b> | 0.57723 |
| STM1644 | ydbL    | putative periplasmic protein                        | <b>-0.35</b> | 0.39069 |
| STM1644 | ydbL    | putative periplasmic protein                        | <b>0.89</b>  | 0.15078 |
| STM1645 | ynbE    | putative outer membrane lipoprotein                 | <b>-0.28</b> | 0.48814 |
| STM1645 | ynbE    | putative outer membrane lipoprotein                 | <b>0.41</b>  | 0.34051 |
| STM1646 | ydbH    | putative periplasmic protein                        | <b>0.23</b>  | 0.65945 |

|           |         |                                                 |              |         |
|-----------|---------|-------------------------------------------------|--------------|---------|
| STM1646   | ydbH    | putative periplasmic protein                    | <b>-0.19</b> | 0.65305 |
| STM1647   | ldhA    | D-lactate dehydrogenase                         | <b>0.27</b>  | 0.48300 |
| STM1647   | ldhA    | D-lactate dehydrogenase                         | <b>0.54</b>  | 0.20881 |
| STM1648   | hslJ    | heat shock protein hslJ                         | <b>-0.55</b> | 0.41671 |
| STM1648   | hslJ    | heat shock protein hslJ                         | <b>-0.09</b> | 0.86172 |
| STM1649   | STM1649 | putative cytoplasmic protein                    | <b>-0.13</b> | 0.72781 |
| STM1649   | STM1649 | putative cytoplasmic protein                    | <b>0.04</b>  | 0.94417 |
| STM1651   | nifJ    | putative pyruvate-flavodoxin oxidoreductase     | <b>-0.53</b> | 0.26910 |
| STM1651   | nifJ    | putative pyruvate-flavodoxin oxidoreductase     | <b>0.21</b>  | 0.61895 |
| STM1652   | ynaF    | putative universal stress protein               | <b>0.26</b>  | 0.48062 |
| STM1652   | ynaF    | putative universal stress protein               | <b>0.37</b>  | 0.41626 |
| STM1654   | ydaO    | putative ATPase                                 | <b>-0.19</b> | 0.66677 |
| STM1654   | ydaO    | putative ATPase                                 | <b>-0.28</b> | 0.58117 |
| STM1655   | dbpA    | ATP-dependent RNA helicase                      | <b>-0.60</b> | 0.17109 |
| STM1655   | dbpA    | ATP-dependent RNA helicase                      | <b>0.31</b>  | 0.51549 |
| STM1656   | STM1656 | putative Zn transport protein                   | <b>-0.27</b> | 0.60751 |
| STM1656   | STM1656 | putative Zn transport protein                   | <b>0.25</b>  | 0.71690 |
| STM1657   | STM1657 | putative methyl-accepting chemotaxis protein    | <b>0.23</b>  | 0.62174 |
| STM1657   | STM1657 | putative methyl-accepting chemotaxis protein    | <b>0.28</b>  | 0.56337 |
| STM1658   | ydaL    | hypothetical protein STM1658                    | <b>-0.41</b> | 0.34021 |
| STM1658   | ydaL    | hypothetical protein STM1658                    | <b>0.37</b>  | 0.45214 |
|           |         | O-6-alkylguanine-DNA/cysteine-protein           |              |         |
| STM1659   | ogt     | methyltransferase                               | <b>-0.18</b> | 0.78016 |
|           |         | O-6-alkylguanine-DNA/cysteine-protein           |              |         |
| STM1659   | ogt     | methyltransferase                               | <b>0.24</b>  | 0.69816 |
| STM1660,S | fnr     | transcriptional regulator                       | <b>0.15</b>  | 0.70122 |
| STM1660,S | fnr     | transcriptional regulator                       | <b>0.52</b>  | 0.22421 |
| STM1661   | ydaA    | putative universal stress protein               | <b>0.42</b>  | 0.26261 |
| STM1661   | ydaA    | putative universal stress protein               | <b>0.08</b>  | 0.91387 |
| STM1662   | ynaJ    | putative inner membrane protein                 | <b>0.09</b>  | 0.84187 |
| STM1662   | ynaJ    | putative inner membrane protein                 | <b>0.22</b>  | 0.60014 |
| STM1663   | ynal    | putative integral membrane protein              | <b>-0.18</b> | 0.76502 |
| STM1663   | ynal    | putative integral membrane protein              | <b>0.24</b>  | 0.59172 |
| STM1664   | STM1664 | putative transcriptional regulator              | <b>-1.10</b> | 0.19398 |
| STM1664   | STM1664 | putative transcriptional regulator              | <b>-0.14</b> | 0.87512 |
| STM1665   | STM1665 | putative cytoplasmic protein                    | <b>-0.15</b> | 0.76553 |
| STM1665   | STM1665 | putative cytoplasmic protein                    | <b>0.35</b>  | 0.49871 |
| STM1667   | STM1667 | putative thiol peroxidase                       | <b>-0.49</b> | 0.44832 |
| STM1667   | STM1667 | putative thiol peroxidase                       | <b>-0.20</b> | 0.76008 |
| STM1668   | STM1668 | hypothetical protein STM1668                    | <b>-0.32</b> | 0.52897 |
| STM1668   | STM1668 | hypothetical protein STM1668                    | <b>-0.01</b> | 0.99080 |
| STM1669   | STM1669 | invasin-like protein                            | <b>-0.35</b> | 0.37619 |
| STM1669   | STM1669 | invasin-like protein                            | <b>0.82</b>  | 0.29453 |
| STM1670   | STM1670 | putative lipoprotein                            | <b>-0.54</b> | 0.36465 |
| STM1670   | STM1670 | putative lipoprotein                            | <b>0.17</b>  | 0.76378 |
| STM1671   | STM1671 | putative regulatory protein                     | <b>-0.22</b> | 0.68450 |
| STM1671   | STM1671 | putative regulatory protein                     | <b>0.29</b>  | 0.54735 |
| STM1673   | STM1673 | putative outer membrane lipoprotein             | <b>-0.01</b> | 0.98445 |
| STM1673   | STM1673 | putative outer membrane lipoprotein             | <b>0.14</b>  | 0.74721 |
| STM1674   | STM1674 | putative regulatory protein                     | <b>-0.09</b> | 0.86861 |
| STM1674   | STM1674 | putative regulatory protein                     | <b>0.86</b>  | 0.36942 |
| STM1675   | STM1675 | oxidoreductase                                  | <b>-0.12</b> | 0.76312 |
| STM1675   | STM1675 | oxidoreductase                                  | <b>0.81</b>  | 0.21855 |
| STM1676   | STM1676 | putative aldo/keto reductase                    | <b>0.06</b>  | 0.93638 |
| STM1676   | STM1676 | putative aldo/keto reductase                    | <b>0.51</b>  | 0.42935 |
| STM1677   | STM1677 | putative transcriptional regulator              | <b>-0.14</b> | 0.83279 |
| STM1677   | STM1677 | putative transcriptional regulator              | <b>0.42</b>  | 0.39770 |
| STM1678   | STM1678 | putative 2'-hydroxyisoflavone reductase         | <b>-0.78</b> | 0.15053 |
| STM1678   | STM1678 | putative 2'-hydroxyisoflavone reductase         | <b>0.01</b>  | 0.97646 |
| STM1679   | mppA    | periplasmic murein tripeptide transport protein | <b>-0.07</b> | 0.87512 |
| STM1679   | mppA    | periplasmic murein tripeptide transport protein | <b>-0.17</b> | 0.76810 |
| STM1680   | ycjI    | putative carboxypeptidase                       | <b>-0.50</b> | 0.21747 |
| STM1680   | ycjI    | putative carboxypeptidase                       | <b>-0.19</b> | 0.70082 |

|         |         |                                                |              |         |
|---------|---------|------------------------------------------------|--------------|---------|
| STM1681 | ycjG    | putative chloromuconate cycloisomerase         | <b>-0.20</b> | 0.69094 |
| STM1681 | ycjG    | putative chloromuconate cycloisomerase         | <b>-0.02</b> | 0.97348 |
| STM1682 | tpx     | thiol peroxidase                               | <b>0.05</b>  | 0.92387 |
| STM1682 | tpx     | thiol peroxidase                               | <b>-0.11</b> | 0.82443 |
| STM1683 | tyrR    | transcriptional regulator                      | <b>-0.30</b> | 0.46859 |
| STM1683 | tyrR    | transcriptional regulator                      | <b>-0.18</b> | 0.69398 |
| STM1684 | ycjF    | hypothetical protein STM1684                   | <b>-0.24</b> | 0.48818 |
| STM1684 | ycjF    | hypothetical protein STM1684                   | <b>-0.26</b> | 0.70137 |
| STM1685 | ycjX    | putative ATPase                                | <b>-0.27</b> | 0.53812 |
| STM1685 | ycjX    | putative ATPase                                | <b>-0.21</b> | 0.58095 |
| STM1686 | pspE    | phage shock protein                            | <b>-0.22</b> | 0.72521 |
| STM1686 | pspE    | phage shock protein                            | <b>-0.10</b> | 0.82313 |
| STM1687 | pspD    | phage shock protein                            | <b>-0.47</b> | 0.32181 |
| STM1687 | pspD    | phage shock protein                            | <b>0.04</b>  | 0.96164 |
| STM1688 | pspC    | phage shock protein                            | <b>-0.11</b> | 0.79356 |
| STM1688 | pspC    | phage shock protein                            | <b>-0.04</b> | 0.93772 |
| STM1689 | pspB    | phage shock protein B                          | <b>-0.59</b> | 0.18918 |
| STM1689 | pspB    | phage shock protein B                          | <b>0.44</b>  | 0.33093 |
| STM1690 | pspA    | phage shock protein                            | <b>-0.13</b> | 0.78641 |
| STM1690 | pspA    | phage shock protein                            | <b>0.24</b>  | 0.65025 |
| STM1691 | pspF    | transcription activator                        | <b>-0.24</b> | 0.66677 |
| STM1691 | pspF    | transcription activator                        | <b>0.32</b>  | 0.41134 |
| STM1692 | sapA    | peptide transport protein                      | <b>-0.64</b> | 0.24005 |
| STM1692 | sapA    | peptide transport protein                      | <b>0.04</b>  | 0.96205 |
| STM1693 | sapB    | peptide transport protein                      | <b>-0.29</b> | 0.56860 |
| STM1693 | sapB    | peptide transport protein                      | <b>-0.09</b> | 0.87126 |
| STM1694 | sapC    | peptide transport protein                      | <b>0.24</b>  | 0.55397 |
| STM1694 | sapC    | peptide transport protein                      | <b>0.14</b>  | 0.72083 |
| STM1695 | sapD    | peptide transport protein                      | <b>-0.02</b> | 0.98226 |
| STM1695 | sapD    | peptide transport protein                      | <b>0.17</b>  | 0.68450 |
| STM1696 | sapF    | peptide transport protein                      | <b>-0.47</b> | 0.22285 |
| STM1696 | sapF    | peptide transport protein                      | <b>-0.11</b> | 0.85745 |
| STM1697 | STM1697 | hypothetical protein STM1697                   | <b>-0.34</b> | 0.39520 |
| STM1697 | STM1697 | hypothetical protein STM1697                   | <b>0.00</b>  | 0.99938 |
| STM1698 | STM1698 | putative inner membrane protein                | <b>-0.72</b> | 0.15859 |
| STM1698 | STM1698 | putative inner membrane protein                | <b>-0.19</b> | 0.77025 |
| STM1700 | fabI    | enoyl-(acyl carrier protein) reductase         | <b>-0.42</b> | 0.27681 |
| STM1700 | fabI    | enoyl-(acyl carrier protein) reductase         | <b>-0.07</b> | 0.88902 |
| STM1701 | yciW    | putative cytoplasmic protein                   | <b>0.01</b>  | 0.99274 |
| STM1701 | yciW    | putative cytoplasmic protein                   | <b>-0.09</b> | 0.86017 |
| STM1702 | rnb     | exoribonuclease II                             | <b>-0.26</b> | 0.46674 |
| STM1702 | rnb     | exoribonuclease II                             | <b>0.19</b>  | 0.63688 |
| STM1703 | yciR    | putative diguanylate cyclase/phosphodiesterase | <b>-0.72</b> | 0.13112 |
| STM1703 | yciR    | putative diguanylate cyclase/phosphodiesterase | <b>-0.01</b> | 0.98519 |
| STM1704 | yciT    | putative regulatory protein                    | <b>-0.53</b> | 0.26820 |
| STM1704 | yciT    | putative regulatory protein                    | <b>0.18</b>  | 0.65355 |
| STM1705 | osmB    | lipoprotein B                                  | <b>-0.32</b> | 0.48808 |
| STM1705 | osmB    | lipoprotein B                                  | <b>0.32</b>  | 0.41286 |
| STM1706 | yciH    | hypothetical protein STM1706                   | <b>-0.60</b> | 0.20916 |
| STM1706 | yciH    | hypothetical protein STM1706                   | <b>0.09</b>  | 0.91047 |
| STM1707 | pyrF    | orotidine 5'-phosphate decarboxylase           | <b>-0.43</b> | 0.35937 |
| STM1707 | pyrF    | orotidine 5'-phosphate decarboxylase           | <b>-0.12</b> | 0.84673 |
| STM1708 | yciM    | putative N-acetylglucosaminyl transferase      | <b>-0.12</b> | 0.83443 |
| STM1708 | yciM    | putative N-acetylglucosaminyl transferase      | <b>-0.34</b> | 0.34193 |
| STM1709 | yciS    | putative inner membrane protein                | <b>0.04</b>  | 0.93174 |
| STM1709 | yciS    | putative inner membrane protein                | <b>-0.04</b> | 0.93023 |
| STM1710 | pgpB    | phosphatidylglycerophosphate phosphatase B     | <b>-0.44</b> | 0.30106 |
| STM1710 | pgpB    | phosphatidylglycerophosphate phosphatase B     | <b>0.06</b>  | 0.89004 |
| STM1711 | ribA    | GTP cyclohydrolase II protein                  | <b>-0.05</b> | 0.91790 |
| STM1711 | ribA    | GTP cyclohydrolase II protein                  | <b>-0.18</b> | 0.62988 |
| STM1712 | acnA    | aconitate hydratase                            | <b>-0.30</b> | 0.55338 |
| STM1712 | acnA    | aconitate hydratase                            | <b>0.41</b>  | 0.30560 |
| STM1713 | cysB    | transcriptional regulator for cysteine regulon | <b>0.06</b>  | 0.95781 |

|         |         |                                                         |              |         |
|---------|---------|---------------------------------------------------------|--------------|---------|
| STM1713 | cysB    | transcriptional regulator for cysteine regulon          | <b>0.16</b>  | 0.70417 |
| STM1714 | topA    | DNA topoisomerase I                                     | <b>-0.33</b> | 0.61809 |
| STM1714 | topA    | DNA topoisomerase I                                     | <b>0.37</b>  | 0.42591 |
| STM1715 | yciN    | putative cytoplasmic protein                            | <b>0.12</b>  | 0.89108 |
| STM1715 | yciN    | putative cytoplasmic protein                            | <b>0.35</b>  | 0.41676 |
| STM1716 | sohB    | putative peptidase                                      | <b>-0.24</b> | 0.59441 |
| STM1716 | sohB    | putative peptidase                                      | <b>-0.13</b> | 0.80614 |
| STM1717 | yciK    | short chain dehydrogenase                               | <b>-0.04</b> | 0.94417 |
| STM1717 | yciK    | short chain dehydrogenase                               | <b>0.20</b>  | 0.66743 |
| STM1718 | btuR    | cob(I)yrinic acid a,c-diamide adenosyltransferase       | <b>0.07</b>  | 0.85718 |
| STM1718 | btuR    | cob(I)yrinic acid a,c-diamide adenosyltransferase       | <b>0.21</b>  | 0.61614 |
| STM1719 | yciL    | putative ribosomal large subunit pseudouridine synthase | <b>-0.12</b> | 0.81284 |
| STM1719 | yciL    | putative ribosomal large subunit pseudouridine synthase | <b>0.47</b>  | 0.22391 |
| STM1720 | yciO    | putative dsRNA-binding protein                          | <b>-0.08</b> | 0.89468 |
| STM1720 | yciO    | putative dsRNA-binding protein                          | <b>-0.10</b> | 0.86947 |
| STM1721 | trpH    | hypothetical protein STM1721                            | <b>0.09</b>  | 0.84456 |
| STM1721 | trpH    | hypothetical protein STM1721                            | <b>0.27</b>  | 0.60453 |
| STM1723 | trpE    | anthranilate synthase component I                       | <b>0.09</b>  | 0.88561 |
| STM1723 | trpE    | anthranilate synthase component I                       | <b>0.20</b>  | 0.67456 |
| STM1724 | trpD    | anthranilate phosphoribosyltransferase                  | <b>-0.61</b> | 0.38552 |
| STM1724 | trpD    | anthranilate phosphoribosyltransferase                  | <b>-0.05</b> | 0.93563 |
| STM1725 | trpC    | bifunctional indole-3-glycerol phosphate                | <b>-0.24</b> | 0.63475 |
| STM1725 | trpC    | bifunctional indole-3-glycerol phosphate                | <b>0.09</b>  | 0.82464 |
| STM1726 | trpB    | tryptophan synthase subunit beta                        | <b>-0.14</b> | 0.83443 |
| STM1726 | trpB    | tryptophan synthase subunit beta                        | <b>0.33</b>  | 0.48814 |
| STM1727 | trpA    | tryptophan synthase subunit alpha                       | <b>-0.37</b> | 0.46629 |
| STM1727 | trpA    | tryptophan synthase subunit alpha                       | <b>0.53</b>  | 0.34051 |
| STM1728 | yciG    | putative cytoplasmic protein                            | <b>-0.36</b> | 0.51127 |
| STM1728 | yciG    | putative cytoplasmic protein                            | <b>-0.04</b> | 0.96568 |
| STM1729 | yciF    | putative cytoplasmic protein                            | <b>-0.04</b> | 0.97117 |
| STM1729 | yciF    | putative cytoplasmic protein                            | <b>0.75</b>  | 0.34201 |
| STM1730 | yciE    | putative cytoplasmic protein                            | <b>-0.31</b> | 0.68649 |
| STM1730 | yciE    | putative cytoplasmic protein                            | <b>-0.28</b> | 0.74528 |
| STM1731 | STM1731 | putative catalase                                       | <b>0.04</b>  | 0.94617 |
| STM1731 | STM1731 | putative catalase                                       | <b>1.03</b>  | 0.22421 |
| STM1732 | ompW    | outer membrane protein W precursor                      | <b>-0.34</b> | 0.39260 |
| STM1732 | ompW    | outer membrane protein W precursor                      | <b>0.30</b>  | 0.59543 |
| STM1733 | STM1733 | putative ferredoxin                                     | <b>-0.02</b> | 0.96785 |
| STM1733 | STM1733 | putative ferredoxin                                     | <b>-0.05</b> | 0.92809 |
| STM1734 | yciC    | hypothetical protein STM1734                            | <b>-0.23</b> | 0.54618 |
| STM1734 | yciC    | hypothetical protein STM1734                            | <b>-0.12</b> | 0.76240 |
| STM1735 | yciB    | putative intracellular septation protein                | <b>0.08</b>  | 0.84522 |
| STM1735 | yciB    | putative intracellular septation protein                | <b>0.41</b>  | 0.39151 |
| STM1736 | yciA    | putative Acyl-CoA hydrolase                             | <b>0.05</b>  | 0.93767 |
| STM1736 | yciA    | putative Acyl-CoA hydrolase                             | <b>0.31</b>  | 0.45438 |
| STM1737 | tonB    | periplasmic protein                                     | <b>-0.10</b> | 0.83042 |
| STM1737 | tonB    | periplasmic protein                                     | <b>0.56</b>  | 0.24515 |
| STM1738 | yciI    | putative cytoplasmic protein                            | <b>-0.20</b> | 0.62617 |
| STM1738 | yciI    | putative cytoplasmic protein                            | <b>0.10</b>  | 0.83443 |
| STM1739 | cls     | cardiolipin synthetase                                  | <b>-0.15</b> | 0.70229 |
| STM1739 | cls     | cardiolipin synthetase                                  | <b>0.16</b>  | 0.69234 |
| STM1741 | STM1741 | putative voltage-gated potassium channel                | <b>0.03</b>  | 0.95980 |
| STM1741 | STM1741 | putative voltage-gated potassium channel                | <b>0.69</b>  | 0.22421 |
| STM1742 | oppF    | oligopeptide transport protein                          | <b>-0.10</b> | 0.83855 |
| STM1742 | oppF    | oligopeptide transport protein                          | <b>0.16</b>  | 0.73473 |
| STM1743 | oppD    | oligopeptide transporter ATP-binding component          | <b>0.06</b>  | 0.89675 |
| STM1743 | oppD    | oligopeptide transporter ATP-binding component          | <b>0.36</b>  | 0.45797 |
| STM1744 | oppC    | oligopeptide transport protein                          | <b>0.43</b>  | 0.43816 |
| STM1744 | oppC    | oligopeptide transport protein                          | <b>0.01</b>  | 0.99310 |
|         |         | oligopeptide permease ABC transporter membrane          |              |         |
| STM1745 | oppB    | component                                               | <b>-0.87</b> | 0.19843 |
|         |         | oligopeptide permease ABC transporter membrane          |              |         |
| STM1745 | oppB    | component                                               | <b>-0.12</b> | 0.88337 |

|           |         |                                                                  |              |         |
|-----------|---------|------------------------------------------------------------------|--------------|---------|
| STM1746,S | oppA    | oligopeptide transport protein                                   | <b>0.09</b>  | 0.84179 |
| STM1746,S | oppA    | oligopeptide transport protein                                   | <b>0.19</b>  | 0.63859 |
| STM1748   | ychE    | putative integral membrane protein                               | <b>0.06</b>  | 0.92418 |
| STM1748   | ychE    | putative integral membrane protein                               | <b>0.27</b>  | 0.61285 |
| STM1749   | adhE    | iron-dependent alcohol dehydrogenase                             | <b>-0.12</b> | 0.81667 |
| STM1749   | adhE    | iron-dependent alcohol dehydrogenase                             | <b>0.22</b>  | 0.53459 |
| STM1750   | tdk     | thymidine kinase                                                 | <b>0.15</b>  | 0.70144 |
| STM1750   | tdk     | thymidine kinase                                                 | <b>0.10</b>  | 0.89534 |
| STM1751   | hns     | DNA-binding protein HLP-II                                       | <b>-0.09</b> | 0.86190 |
| STM1751   | hns     | DNA-binding protein HLP-II                                       | <b>0.07</b>  | 0.93506 |
| STM1752   | galU    | glucose-1-phosphate uridylyltransferase                          | <b>-0.17</b> | 0.69787 |
| STM1752   | galU    | glucose-1-phosphate uridylyltransferase                          | <b>0.23</b>  | 0.52208 |
| STM1753   | hnr     | response regulator                                               | <b>0.29</b>  | 0.64645 |
| STM1753   | hnr     | response regulator                                               | <b>1.08</b>  | 0.22283 |
| STM1754   | ychK    | putative phosphoesterase                                         | <b>-0.03</b> | 0.95497 |
| STM1754   | ychK    | putative phosphoesterase                                         | <b>-0.07</b> | 0.87208 |
| STM1755   | ychJ    | hypothetical protein STM1755                                     | <b>-0.06</b> | 0.91193 |
| STM1755   | ychJ    | hypothetical protein STM1755                                     | <b>0.38</b>  | 0.29943 |
| STM1756   | purU    | formyltetrahydrofolate deformylase                               | <b>-0.17</b> | 0.68474 |
| STM1756   | purU    | formyltetrahydrofolate deformylase                               | <b>0.25</b>  | 0.60424 |
| STM1758   | rtT     | STM1758                                                          | <b>-0.40</b> | 0.26975 |
| STM1758   | rtT     | STM1758                                                          | <b>-0.19</b> | 0.65983 |
| STM1759   | tyrV    | STM1759                                                          | <b>0.17</b>  | 0.84182 |
| STM1759   | tyrV    | STM1759                                                          | <b>-0.35</b> | 0.54917 |
| STM1759   | tyrV    | STM1759                                                          | <b>0.18</b>  | 0.71978 |
| STM1759   | tyrV    | STM1759                                                          | <b>0.50</b>  | 0.28970 |
| STM1760   | STM1760 | tetratricopeptide repeat protein                                 | <b>-0.37</b> | 0.40096 |
| STM1760   | STM1760 | tetratricopeptide repeat protein                                 | <b>-0.23</b> | 0.54029 |
| STM1761   | narI    | nitrate reductase 1 gamma subunit                                | <b>-0.17</b> | 0.64432 |
| STM1761   | narI    | nitrate reductase 1 gamma subunit                                | <b>0.23</b>  | 0.63592 |
| STM1762   | narJ    | nitrate reductase 1 delta subunit                                | <b>0.41</b>  | 0.48300 |
| STM1762   | narJ    | nitrate reductase 1 delta subunit                                | <b>0.96</b>  | 0.11224 |
| STM1763   | narH    | nitrate reductase 1 beta subunit                                 | <b>-1.03</b> | 0.17754 |
| STM1763   | narH    | nitrate reductase 1 beta subunit                                 | <b>-0.14</b> | 0.75424 |
| STM1764   | narG    | nitrate reductase 1 alpha subunit                                | <b>-0.84</b> | 0.37336 |
| STM1764   | narG    | nitrate reductase 1 alpha subunit                                | <b>-0.64</b> | 0.21026 |
| STM1765   | narK    | nitrite extrusion protein                                        | <b>-0.33</b> | 0.65810 |
| STM1765   | narK    | nitrite extrusion protein                                        | <b>0.17</b>  | 0.82443 |
| STM1766   | narX    | sensory histidine kinase                                         | <b>-0.62</b> | 0.22283 |
| STM1766   | narX    | sensory histidine kinase                                         | <b>-0.35</b> | 0.46088 |
| STM1767   | narL    | response regulator                                               | <b>-0.81</b> | 0.35779 |
| STM1767   | narL    | response regulator                                               | <b>-0.18</b> | 0.79018 |
| STM1768   | ychP    | putative invasin                                                 | <b>-0.33</b> | 0.61248 |
| STM1768   | ychP    | putative invasin                                                 | <b>-0.06</b> | 0.89336 |
| STM1769   | ychN    | putative sulfur reduction protein                                | <b>-0.49</b> | 0.44442 |
| STM1769   | ychN    | putative sulfur reduction protein                                | <b>0.10</b>  | 0.82506 |
| STM1770   | chaB    | cation transport regulator                                       | <b>-0.17</b> | 0.73713 |
| STM1770   | chaB    | cation transport regulator                                       | <b>0.07</b>  | 0.92021 |
| STM1771   | chaA    | sodium-calcium/proton antiporter                                 | <b>-0.16</b> | 0.72781 |
| STM1771   | chaA    | sodium-calcium/proton antiporter                                 | <b>0.04</b>  | 0.93916 |
| STM1772   | kdsA    | 2-dehydro-3-deoxyphosphooctonate aldolase                        | <b>-0.43</b> | 0.39315 |
| STM1772   | kdsA    | 2-dehydro-3-deoxyphosphooctonate aldolase                        | <b>-0.21</b> | 0.65730 |
| STM1773   | ychA    | putative transcriptional regulator                               | <b>-0.06</b> | 0.89529 |
| STM1773   | ychA    | putative transcriptional regulator                               | <b>-0.17</b> | 0.65451 |
| STM1774   | sirC    | transcriptional regulator                                        | <b>0.00</b>  | 0.99316 |
| STM1774   | sirC    | transcriptional regulator                                        | <b>-0.08</b> | 0.89878 |
| STM1775   | hemK    | N5-glutamine S-adenosyl-L-methionine-dependent methyltransferase | <b>-0.22</b> | 0.52351 |
| STM1775   | hemK    | N5-glutamine S-adenosyl-L-methionine-dependent methyltransferase | <b>-0.05</b> | 0.92685 |
| STM1776   | prfA    | peptide chain release factor 1                                   | <b>-0.04</b> | 0.93011 |
| STM1776   | prfA    | peptide chain release factor 1                                   | <b>-0.02</b> | 0.98348 |
| STM1777   | hemA    | glutamyl-tRNA reductase                                          | <b>-0.34</b> | 0.37610 |

|           |         |                                                        |              |         |
|-----------|---------|--------------------------------------------------------|--------------|---------|
| STM1777   | hemA    | glutamyl-tRNA reductase                                | <b>-0.25</b> | 0.65502 |
| STM1778   | lolB    | outer membrane lipoprotein LolB precursor              | <b>0.10</b>  | 0.82664 |
| STM1778   | lolB    | outer membrane lipoprotein LolB precursor              | <b>0.27</b>  | 0.54094 |
| STM1779   | ipk     | 4-diphosphocytidyl-2-C-methyl-D-erythritol kinase      | <b>0.28</b>  | 0.45188 |
| STM1779   | ipk     | 4-diphosphocytidyl-2-C-methyl-D-erythritol kinase      | <b>0.28</b>  | 0.47610 |
| STM1780   | prsA    | ribose-phosphate pyrophosphokinase                     | <b>-0.06</b> | 0.90671 |
| STM1780   | prsA    | ribose-phosphate pyrophosphokinase                     | <b>0.09</b>  | 0.84187 |
| STM1781   | ychM    | putative transport protein                             | <b>-0.33</b> | 0.47804 |
| STM1781   | ychM    | putative transport protein                             | <b>0.24</b>  | 0.61960 |
| STM1782   | ychH    | putative inner membrane protein                        | <b>-0.63</b> | 0.17139 |
| STM1782   | ychH    | putative inner membrane protein                        | <b>0.37</b>  | 0.54227 |
| STM1783,S | pth     | peptidyl-tRNA hydrolase                                | <b>-0.48</b> | 0.21318 |
| STM1783,S | pth     | peptidyl-tRNA hydrolase                                | <b>0.06</b>  | 0.89979 |
| STM1784   | ychF    | putative GTP-binding protein                           | <b>-0.25</b> | 0.49870 |
| STM1784   | ychF    | putative GTP-binding protein                           | <b>0.47</b>  | 0.27067 |
| STM1785   | STM1785 | putative cytoplasmic protein                           | <b>-0.16</b> | 0.71822 |
| STM1785   | STM1785 | putative cytoplasmic protein                           | <b>0.10</b>  | 0.81667 |
| STM1786   | STM1786 | hydrogenase-1 small subunit                            | <b>-0.06</b> | 0.89979 |
| STM1786   | STM1786 | hydrogenase-1 small subunit                            | <b>0.97</b>  | 0.12727 |
| STM1787   | STM1787 | hydrogenase-1 large subunit                            | <b>0.89</b>  | 0.23495 |
| STM1787   | STM1787 | hydrogenase-1 large subunit                            | <b>1.36</b>  | 0.18140 |
| STM1788   | STM1788 | putative Ni/Fe hydrogenase 1 b-type cytochrome subunit | <b>-0.24</b> | 0.56759 |
| STM1788   | STM1788 | putative Ni/Fe hydrogenase 1 b-type cytochrome subunit | <b>0.49</b>  | 0.54347 |
| STM1789   | STM1789 | putative hydrogenase maturation protease               | <b>-0.51</b> | 0.30652 |
| STM1789   | STM1789 | putative hydrogenase maturation protease               | <b>0.25</b>  | 0.82613 |
| STM1790   | STM1790 | putative chaperone                                     | <b>0.02</b>  | 0.98539 |
| STM1790   | STM1790 | putative chaperone                                     | <b>0.34</b>  | 0.50190 |
| STM1791   | STM1791 | putative hydrogenase-1 protein                         | <b>-0.08</b> | 0.85157 |
| STM1791   | STM1791 | putative hydrogenase-1 protein                         | <b>0.58</b>  | 0.26856 |
| STM1792   | STM1792 | putative cytochrome oxidase subunit I                  | <b>0.13</b>  | 0.78286 |
| STM1792   | STM1792 | putative cytochrome oxidase subunit I                  | <b>0.10</b>  | 0.87016 |
| STM1793   | STM1793 | putative cytochrome oxidase subunit II                 | <b>0.89</b>  | 0.12468 |
| STM1793   | STM1793 | putative cytochrome oxidase subunit II                 | <b>0.88</b>  | 0.41969 |
| STM1795   | STM1795 | putative glutamic dehydrogenase-like protein           | <b>0.14</b>  | 0.76043 |
| STM1795   | STM1795 | putative glutamic dehydrogenase-like protein           | <b>0.73</b>  | 0.17481 |
| STM1796   | treA    | trehalase                                              | <b>-0.50</b> | 0.40020 |
| STM1796   | treA    | trehalase                                              | <b>0.19</b>  | 0.63101 |
| STM1797   | ymgE    | putative transglycosylase-associated protein           | <b>-0.20</b> | 0.69398 |
| STM1797   | ymgE    | putative transglycosylase-associated protein           | <b>0.07</b>  | 0.91359 |
| STM1798   | ycgR    | putative inner membrane protein                        | <b>-0.36</b> | 0.37331 |
| STM1798   | ycgR    | putative inner membrane protein                        | <b>-0.01</b> | 0.98615 |
| STM1799   | emtA    | membrane-bound lytic murein transglycosylase E         | <b>-0.06</b> | 0.89979 |
| STM1799   | emtA    | membrane-bound lytic murein transglycosylase E         | <b>-0.08</b> | 0.87131 |
| STM1800   | ycgQ    | putative microcin C7 resistance protein                | <b>-0.17</b> | 0.76492 |
| STM1800   | ycgQ    | putative microcin C7 resistance protein                | <b>-0.01</b> | 0.98855 |
| STM1801   | ycgO    | cell volume regulation protein CvrA                    | <b>-0.73</b> | 0.19870 |
| STM1801   | ycgO    | cell volume regulation protein CvrA                    | <b>0.19</b>  | 0.75503 |
| STM1802   | alr     | alanine racemase                                       | <b>0.12</b>  | 0.76483 |
| STM1802   | alr     | alanine racemase                                       | <b>0.35</b>  | 0.63148 |
| STM1803   | dadA    | D-amino acid dehydrogenase small subunit               | <b>-0.16</b> | 0.73546 |
| STM1803   | dadA    | D-amino acid dehydrogenase small subunit               | <b>0.66</b>  | 0.33840 |
| STM1804,S | ycgB    | putative cytoplasmic protein                           | <b>-0.44</b> | 0.26213 |
| STM1804,S | ycgB    | putative cytoplasmic protein                           | <b>0.15</b>  | 0.73157 |
| STM1805   | fadR    | fatty acid metabolism regulator                        | <b>-0.91</b> | 0.16281 |
| STM1805   | fadR    | fatty acid metabolism regulator                        | <b>0.03</b>  | 0.96630 |
| STM1806   | nhaB    | Na <sup>+</sup> /H <sup>+</sup> antiporter             | <b>-0.40</b> | 0.46970 |
| STM1806   | nhaB    | Na <sup>+</sup> /H <sup>+</sup> antiporter             | <b>-0.08</b> | 0.87837 |
| STM1807   | dsbB    | disulfide bond formation protein B                     | <b>-0.45</b> | 0.31344 |
| STM1807   | dsbB    | disulfide bond formation protein B                     | <b>-0.06</b> | 0.89542 |
| STM1808   | STM1808 | putative cytoplasmic protein                           | <b>-0.18</b> | 0.63493 |
| STM1808   | STM1808 | putative cytoplasmic protein                           | <b>0.37</b>  | 0.51274 |
| STM1810   | STM1810 | putative cytoplasmic protein                           | <b>-0.43</b> | 0.35395 |
| STM1810   | STM1810 | putative cytoplasmic protein                           | <b>-0.02</b> | 0.97090 |

|           |           |                                                   |              |         |
|-----------|-----------|---------------------------------------------------|--------------|---------|
| STM1811   | ycgN      | hypothetical protein STM1811                      | <b>-0.22</b> | 0.61690 |
| STM1811   | ycgN      | hypothetical protein STM1811                      | <b>0.14</b>  | 0.76538 |
| STM1812   | ycgM      | putative fumarylacetoacetate hydrolase            | <b>-0.52</b> | 0.35564 |
| STM1812   | ycgM      | putative fumarylacetoacetate hydrolase            | <b>-0.16</b> | 0.72518 |
| STM1813   | ycgL      | putative cytoplasmic protein                      | <b>0.00</b>  | 0.99770 |
| STM1813   | ycgL      | putative cytoplasmic protein                      | <b>0.25</b>  | 0.51033 |
| STM1814   | minC      | septum formation inhibitor                        | <b>0.04</b>  | 0.93485 |
| STM1814   | minC      | septum formation inhibitor                        | <b>0.05</b>  | 0.91047 |
| STM1815   | minD      | cell division inhibitor protein                   | <b>-0.35</b> | 0.34070 |
| STM1815   | minD      | cell division inhibitor protein                   | <b>0.04</b>  | 0.92021 |
| STM1816   | minE      | cell division topological specificity factor MinE | <b>0.01</b>  | 0.97742 |
| STM1816   | minE      | cell division topological specificity factor MinE | <b>0.49</b>  | 0.25845 |
| STM1817   | rnd       | RNase D                                           | <b>0.17</b>  | 0.78822 |
| STM1817   | rnd       | RNase D                                           | <b>0.56</b>  | 0.27681 |
| STM1818   | fadD      | acyl-CoA synthase                                 | <b>-0.35</b> | 0.42591 |
| STM1818   | fadD      | acyl-CoA synthase                                 | <b>0.08</b>  | 0.86654 |
| STM1819   | slp       | putative outer membrane protein                   | <b>-0.11</b> | 0.82518 |
| STM1819   | slp       | putative outer membrane protein                   | <b>-0.10</b> | 0.81994 |
| STM1820   | yeaZ      | putative molecular chaperone                      | <b>-0.08</b> | 0.86133 |
| STM1820   | yeaZ      | putative molecular chaperone                      | <b>0.41</b>  | 0.32181 |
| STM1821   | yoaA      | putative DNA helicase                             | <b>-0.12</b> | 0.80406 |
| STM1821   | yoaA      | putative DNA helicase                             | <b>-0.22</b> | 0.67473 |
| STM1822   | yoaB      | putative translation initiation inhibitor         | <b>-0.17</b> | 0.76883 |
| STM1822   | yoaB      | putative translation initiation inhibitor         | <b>-0.18</b> | 0.69738 |
| STM1823   | yoaH      | hypothetical protein STM1823                      | <b>-0.29</b> | 0.52021 |
| STM1823   | yoaH      | hypothetical protein STM1823                      | <b>0.26</b>  | 0.58164 |
| STM1824   | pabB      | para-aminobenzoate synthase component I           | <b>-0.35</b> | 0.51545 |
| STM1824   | pabB      | para-aminobenzoate synthase component I           | <b>-0.28</b> | 0.53173 |
| STM1825   | yeaB      | putative NTP pyrophosphohydrolase                 | <b>0.25</b>  | 0.52799 |
| STM1825   | yeaB      | putative NTP pyrophosphohydrolase                 | <b>0.47</b>  | 0.27996 |
| STM1826   | sdaA      | L-serine deaminase I/L-threonine deaminase I      | <b>-0.28</b> | 0.57345 |
| STM1826   | sdaA      | L-serine deaminase I/L-threonine deaminase I      | <b>-0.04</b> | 0.95747 |
| STM1827,S | STM1827,S | putative diguanylate cyclase/phosphodiesterase    | <b>0.11</b>  | 0.87359 |
| STM1827,S | STM1827,S | putative diguanylate cyclase/phosphodiesterase    | <b>0.66</b>  | 0.20285 |
| STM1828   | yoaE      | putative inner membrane protein                   | <b>0.27</b>  | 0.67351 |
| STM1828   | yoaE      | putative inner membrane protein                   | <b>0.62</b>  | 0.26365 |
| STM1830   | manX      | mannose-specific enzyme IIAB                      | <b>0.12</b>  | 0.90797 |
| STM1830   | manX      | mannose-specific enzyme IIAB                      | <b>0.87</b>  | 0.17139 |
| STM1831   | manY      | mannose-specific enzyme IIC                       | <b>0.39</b>  | 0.59544 |
| STM1831   | manY      | mannose-specific enzyme IIC                       | <b>0.54</b>  | 0.30715 |
| STM1832   | manZ      | mannose-specific enzyme IID                       | <b>0.19</b>  | 0.65974 |
| STM1832   | manZ      | mannose-specific enzyme IID                       | <b>0.30</b>  | 0.44344 |
| STM1833   | STM1833   | hypothetical protein STM1833                      | <b>-0.12</b> | 0.82350 |
| STM1833   | STM1833   | hypothetical protein STM1833                      | <b>0.82</b>  | 0.13027 |
| STM1834   | yebN      | putative transport protein                        | <b>-0.46</b> | 0.25460 |
| STM1834   | yebN      | putative transport protein                        | <b>-0.25</b> | 0.55787 |
| STM1835   | rrmA      | 23S rRNA m1G745 methyltransferase                 | <b>-0.03</b> | 0.96423 |
| STM1835   | rrmA      | 23S rRNA m1G745 methyltransferase                 | <b>0.26</b>  | 0.53124 |
| STM1836   | STM1836   | putative penicillin-binding protein 3             | <b>-0.17</b> | 0.73448 |
| STM1836   | STM1836   | putative penicillin-binding protein 3             | <b>1.39</b>  | 0.22602 |
| STM1837   | cspC      | cold shock protein                                | <b>-0.37</b> | 0.62970 |
| STM1837   | cspC      | cold shock protein                                | <b>-0.36</b> | 0.60249 |
| STM1839   | STM1839   | hypothetical protein STM1839                      | <b>-0.70</b> | 0.46915 |
| STM1839   | STM1839   | hypothetical protein STM1839                      | <b>-0.78</b> | 0.11224 |
| STM1840   | yobG      | putative inner membrane protein                   | <b>-1.26</b> | 0.03091 |
| STM1840   | yobG      | putative inner membrane protein                   | <b>-1.15</b> | 0.07318 |
| STM1841   | STM1841   | hypothetical protein STM1841                      | <b>-0.05</b> | 0.92506 |
| STM1841   | STM1841   | hypothetical protein STM1841                      | <b>0.01</b>  | 0.99268 |
| STM1842   | kdgR      | putative transcriptional repressor                | <b>0.02</b>  | 0.97001 |
| STM1842   | kdgR      | putative transcriptional repressor                | <b>0.05</b>  | 0.93688 |
| STM1843   | STM1843   | putative transport protein                        | <b>-0.04</b> | 0.94016 |
| STM1843   | STM1843   | putative transport protein                        | <b>-0.03</b> | 0.95980 |
| STM1844   | htpX      | heat shock protein HtpX                           | <b>-0.42</b> | 0.24313 |

|            |            |                                         |              |         |
|------------|------------|-----------------------------------------|--------------|---------|
| STM1844    | htpX       | heat shock protein HtpX                 | <b>0.39</b>  | 0.32967 |
| STM1845    | prc        | carboxy-terminal protease               | <b>-0.51</b> | 0.24568 |
| STM1845    | prc        | carboxy-terminal protease               | <b>0.70</b>  | 0.19967 |
| STM1846    | proQ       | putative solute/DNA competence effector | <b>0.15</b>  | 0.70966 |
| STM1846    | proQ       | putative solute/DNA competence effector | <b>0.43</b>  | 0.29044 |
| STM1847    | yebR       | putative nucleotide-binding protein     | <b>-0.11</b> | 0.77186 |
| STM1847    | yebR       | putative nucleotide-binding protein     | <b>-0.13</b> | 0.73781 |
| STM1848    | yebS       | putative inner membrane protein         | <b>0.18</b>  | 0.67448 |
| STM1848    | yebS       | putative inner membrane protein         | <b>0.31</b>  | 0.56786 |
| STM1849    | STM1849    | putative inner membrane protein         | <b>-0.35</b> | 0.38351 |
| STM1849    | STM1849    | putative inner membrane protein         | <b>0.09</b>  | 0.83655 |
| STM1850    | yebU       | putative rRNA methyltransferase         | <b>-0.08</b> | 0.83191 |
| STM1850    | yebU       | putative rRNA methyltransferase         | <b>-0.14</b> | 0.76540 |
| STM1851    | STM1851    | putative cytoplasmic protein            | <b>-0.56</b> | 0.25454 |
| STM1851    | STM1851    | putative cytoplasmic protein            | <b>-0.24</b> | 0.64367 |
| STM1852    | yebW       | putative inner membrane lipoprotein     | <b>-0.02</b> | 0.97602 |
| STM1852    | yebW       | putative inner membrane lipoprotein     | <b>-0.10</b> | 0.86207 |
| STM1853    | prpA       | serine/threonine protein phosphatase    | <b>-0.46</b> | 0.38394 |
| STM1853    | prpA       | serine/threonine protein phosphatase    | <b>0.55</b>  | 0.61375 |
| STM1854    | STM1854    | putative inner membrane protein         | <b>-0.25</b> | 0.65271 |
| STM1854    | STM1854    | putative inner membrane protein         | <b>0.07</b>  | 0.87096 |
| STM1855    | sopE2      | type III-secreted effector protein      | <b>0.04</b>  | 0.94329 |
| STM1855    | sopE2      | type III-secreted effector protein      | <b>0.37</b>  | 0.36942 |
| STM1856    | STM1856    | putative cytoplasmic protein            | <b>0.53</b>  | 0.22602 |
| STM1856    | STM1856    | putative cytoplasmic protein            | <b>0.34</b>  | 0.51381 |
| STM1856,1N | STM1856,1N | hypothetical protein STM1856,1N         | <b>-0.24</b> | 0.64909 |
| STM1856,1N | STM1856,1N | hypothetical protein STM1856,1N         | <b>0.79</b>  | 0.24818 |
| STM1857    | STM1857    | putative acetyltransferase              | <b>0.20</b>  | 0.71606 |
| STM1857    | STM1857    | putative acetyltransferase              | <b>0.49</b>  | 0.24973 |
| STM1862    | pagO       | integral membrane protein               | <b>-0.26</b> | 0.52364 |
| STM1862    | pagO       | integral membrane protein               | <b>0.12</b>  | 0.81737 |
| STM1863    | STM1863    | putative inner membrane protein         | <b>-0.54</b> | 0.35824 |
| STM1863    | STM1863    | putative inner membrane protein         | <b>0.39</b>  | 0.64175 |
| STM1864    | STM1864    | putative inner membrane protein         | <b>-0.10</b> | 0.91170 |
| STM1864    | STM1864    | putative inner membrane protein         | <b>0.06</b>  | 0.90513 |
| STM1868    | mig-3      | phage-tail assembly-like protein        | <b>-0.63</b> | 0.17754 |
| STM1868    | mig-3      | phage-tail assembly-like protein        | <b>-0.28</b> | 0.46199 |
| STM1868,1N | STM1868,1N | hypothetical protein STM1868,1N         | <b>-0.64</b> | 0.23123 |
| STM1868,1N | STM1868,1N | hypothetical protein STM1868,1N         | <b>0.41</b>  | 0.33587 |
| STM1868A   | STM1868A   | lytic enzyme                            | <b>-0.27</b> | 0.62617 |
| STM1868A   | STM1868A   | lytic enzyme                            | <b>0.50</b>  | 0.46169 |
| STM1869    | STM1869    | phage-tail assembly-like protein        | <b>-0.15</b> | 0.81270 |
| STM1869    | STM1869    | phage-tail assembly-like protein        | <b>0.61</b>  | 0.46760 |
| STM1870    | STM1870    | RecE-like protein                       | <b>-0.46</b> | 0.49870 |
| STM1870    | STM1870    | RecE-like protein                       | <b>0.13</b>  | 0.76538 |
| STM1873    | STM1873    | hypothetical protein STM1873            | <b>-0.44</b> | 0.49299 |
| STM1873    | STM1873    | hypothetical protein STM1873            | <b>0.09</b>  | 0.86968 |
| STM1874    | STM1874    | putative inner membrane protein         | <b>0.15</b>  | 0.73846 |
| STM1874    | STM1874    | putative inner membrane protein         | <b>0.51</b>  | 0.36311 |
| STM1875    | yobA       | putative copper resistance protein      | <b>0.09</b>  | 0.89003 |
| STM1875    | yobA       | putative copper resistance protein      | <b>0.34</b>  | 0.54946 |
| STM1876    | holE       | DNA polymerase III theta subunit        | <b>-0.01</b> | 0.98566 |
| STM1876    | holE       | DNA polymerase III theta subunit        | <b>0.00</b>  | 0.99822 |
| STM1877    | STM1877    | putative amidohydrolase                 | <b>0.23</b>  | 0.72040 |
| STM1877    | STM1877    | putative amidohydrolase                 | <b>0.69</b>  | 0.43982 |
| STM1878    | exoX       | exodeoxyribonuclease X                  | <b>-0.13</b> | 0.74142 |
| STM1878    | exoX       | exodeoxyribonuclease X                  | <b>0.45</b>  | 0.26910 |
| STM1879    | ptrB       | protease II                             | <b>-0.30</b> | 0.55978 |
| STM1879    | ptrB       | protease II                             | <b>0.19</b>  | 0.71169 |
| STM1880    | yebE       | putative inner membrane protein         | <b>-0.81</b> | 0.14285 |
| STM1880    | yebE       | putative inner membrane protein         | <b>-0.11</b> | 0.89542 |
| STM1881    | yebF       | putative periplasmic protein            | <b>-0.03</b> | 0.94472 |
| STM1881    | yebF       | putative periplasmic protein            | <b>0.86</b>  | 0.17358 |

|           |         |                                                                     |              |         |
|-----------|---------|---------------------------------------------------------------------|--------------|---------|
| STM1882   | yebG    | DNA damage-inducible protein                                        | <b>-0.16</b> | 0.64590 |
| STM1882   | yebG    | DNA damage-inducible protein                                        | <b>0.42</b>  | 0.48062 |
| STM1883   | purT    | 5'-phosphoribosylglycinamide transformylase                         | <b>-0.22</b> | 0.77346 |
| STM1883   | purT    | 5'-phosphoribosylglycinamide transformylase                         | <b>0.76</b>  | 0.39243 |
| STM1884   | eda     | keto-hydroxyglutarate-aldolase/keto-deoxy-phosphogluconate aldolase | <b>-0.26</b> | 0.58216 |
| STM1884   | eda     | keto-hydroxyglutarate-aldolase/keto-deoxy-phosphogluconate aldolase | <b>0.08</b>  | 0.83443 |
| STM1885   | edd     | phosphogluconate dehydratase                                        | <b>-0.21</b> | 0.64163 |
| STM1885   | edd     | phosphogluconate dehydratase                                        | <b>0.03</b>  | 0.96107 |
| STM1886   | zwf     | glucose-6-phosphate 1-dehydrogenase                                 | <b>0.24</b>  | 0.48447 |
| STM1886   | zwf     | glucose-6-phosphate 1-dehydrogenase                                 | <b>0.59</b>  | 0.34148 |
| STM1887   | yebK    | putative transcriptional regulator                                  | <b>-0.07</b> | 0.92008 |
| STM1887   | yebK    | putative transcriptional regulator                                  | <b>0.59</b>  | 0.18426 |
| STM1888   | pykA    | pyruvate kinase                                                     | <b>-0.07</b> | 0.87518 |
| STM1888   | pykA    | pyruvate kinase                                                     | <b>0.26</b>  | 0.45824 |
| STM1889   | msbB    | lipid A biosynthesis lauroyl acyltransferase                        | <b>-0.39</b> | 0.42940 |
| STM1889   | msbB    | lipid A biosynthesis lauroyl acyltransferase                        | <b>-0.37</b> | 0.34051 |
| STM1890   | yebA    | putative peptidase                                                  | <b>-0.08</b> | 0.90136 |
| STM1890   | yebA    | putative peptidase                                                  | <b>0.08</b>  | 0.89487 |
| STM1891   | znuA    | high-affinity Zn transport protein                                  | <b>-0.03</b> | 0.95747 |
| STM1891   | znuA    | high-affinity Zn transport protein                                  | <b>0.27</b>  | 0.54656 |
| STM1892,S | znuC    | high-affinity Zn transport protein                                  | <b>-0.27</b> | 0.61285 |
| STM1892,S | znuC    | high-affinity Zn transport protein                                  | <b>0.13</b>  | 0.75437 |
| STM1893   | znuB    | high-affinity Zn transport protein                                  | <b>0.15</b>  | 0.83084 |
| STM1893   | znuB    | high-affinity Zn transport protein                                  | <b>0.04</b>  | 0.96238 |
| STM1894   | ruvB    | Holliday junction DNA helicase RuvB                                 | <b>-0.30</b> | 0.50825 |
| STM1894   | ruvB    | Holliday junction DNA helicase RuvB                                 | <b>0.13</b>  | 0.77677 |
| STM1895   | ruvA    | Holliday junction DNA helicase motor protein                        | <b>0.00</b>  | 0.99512 |
| STM1895   | ruvA    | Holliday junction DNA helicase motor protein                        | <b>0.18</b>  | 0.82285 |
| STM1896   | STM1896 | putative cytoplasmic protein                                        | <b>0.55</b>  | 0.35466 |
| STM1896   | STM1896 | putative cytoplasmic protein                                        | <b>1.31</b>  | 0.20749 |
| STM1897   | yebB    | putative periplasmic protein                                        | <b>-0.20</b> | 0.64730 |
| STM1897   | yebB    | putative periplasmic protein                                        | <b>-0.22</b> | 0.61532 |
| STM1898   | ruvC    | Holliday junction resolvase                                         | <b>-0.35</b> | 0.44812 |
| STM1898   | ruvC    | Holliday junction resolvase                                         | <b>-0.30</b> | 0.41785 |
| STM1899   | yebC    | hypothetical protein STM1899                                        | <b>-0.52</b> | 0.32204 |
| STM1899   | yebC    | hypothetical protein STM1899                                        | <b>-0.26</b> | 0.53741 |
| STM1900   | ntpA    | dATP pyrophosphohydrolase                                           | <b>-0.02</b> | 0.96568 |
| STM1900   | ntpA    | dATP pyrophosphohydrolase                                           | <b>-0.08</b> | 0.83443 |
| STM1901   | aspS    | aspartyl-tRNA synthetase                                            | <b>-0.59</b> | 0.26833 |
| STM1901   | aspS    | aspartyl-tRNA synthetase                                            | <b>-0.46</b> | 0.28861 |
| STM1902   | yecD    | putative isochorismatase                                            | <b>-0.14</b> | 0.79246 |
| STM1902   | yecD    | putative isochorismatase                                            | <b>0.22</b>  | 0.59820 |
| STM1903   | yecE    | putative cytoplasmic protein                                        | <b>-0.03</b> | 0.95532 |
| STM1903   | yecE    | putative cytoplasmic protein                                        | <b>0.14</b>  | 0.74374 |
| STM1904   | yecN    | putative inner membrane protein                                     | <b>0.14</b>  | 0.76240 |
| STM1904   | yecN    | putative inner membrane protein                                     | <b>0.08</b>  | 0.85683 |
| STM1905   | yecO    | putative SAM-dependent methyltransferase                            | <b>-0.11</b> | 0.76811 |
| STM1905   | yecO    | putative SAM-dependent methyltransferase                            | <b>0.18</b>  | 0.62946 |
| STM1906   | yecP    | putative enzyme                                                     | <b>-0.28</b> | 0.65779 |
| STM1906   | yecP    | putative enzyme                                                     | <b>0.61</b>  | 0.31977 |
| STM1907   | cutC    | copper homeostasis protein                                          | <b>-0.42</b> | 0.53124 |
| STM1907   | cutC    | copper homeostasis protein                                          | <b>0.42</b>  | 0.49708 |
| STM1908   | yecM    | putative cytoplasmic protein                                        | <b>-0.33</b> | 0.37543 |
| STM1908   | yecM    | putative cytoplasmic protein                                        | <b>-0.17</b> | 0.74361 |
| STM1909   | argS    | arginyl-tRNA synthetase                                             | <b>-0.56</b> | 0.19236 |
| STM1909   | argS    | arginyl-tRNA synthetase                                             | <b>-0.09</b> | 0.83843 |
| STM1910   | STM1910 | putative penicillin-binding protein                                 | <b>-0.11</b> | 0.81288 |
| STM1910   | STM1910 | putative penicillin-binding protein                                 | <b>1.01</b>  | 0.17603 |
| STM1911   | STM1911 | putative cytoplasmic protein                                        | <b>-0.10</b> | 0.87999 |
| STM1911   | STM1911 | putative cytoplasmic protein                                        | <b>-0.03</b> | 0.96261 |
| STM1912   | flhE    | flagellar protein                                                   | <b>0.26</b>  | 0.55892 |

|           |         |                                             |              |         |
|-----------|---------|---------------------------------------------|--------------|---------|
| STM1912   | flhE    | flagellar protein                           | <b>0.28</b>  | 0.70249 |
| STM1913   | flhA    | flagellar biosynthesis protein              | <b>-0.23</b> | 0.55956 |
| STM1913   | flhA    | flagellar biosynthesis protein              | <b>-0.08</b> | 0.86876 |
| STM1914   | flhB    | flagellar biosynthesis protein              | <b>-0.04</b> | 0.94050 |
| STM1914   | flhB    | flagellar biosynthesis protein              | <b>0.42</b>  | 0.26910 |
| STM1915   | cheZ    | chemotactic response protein                | <b>-0.43</b> | 0.31277 |
| STM1915   | cheZ    | chemotactic response protein                | <b>-0.06</b> | 0.89937 |
| STM1916   | cheY    | chemotaxis regulator                        | <b>-0.08</b> | 0.88998 |
| STM1916   | cheY    | chemotaxis regulator                        | <b>-0.16</b> | 0.71113 |
| STM1917   | cheB    | chemotaxis-specific methylesterase          | <b>-0.08</b> | 0.83109 |
| STM1917   | cheB    | chemotaxis-specific methylesterase          | <b>0.55</b>  | 0.20285 |
| STM1918   | cheR    | glutamate methyltransferase                 | <b>0.26</b>  | 0.49009 |
| STM1918   | cheR    | glutamate methyltransferase                 | <b>0.21</b>  | 0.59940 |
| STM1919   | cheM    | methyl accepting chemotaxis protein II      | <b>0.10</b>  | 0.82006 |
| STM1919   | cheM    | methyl accepting chemotaxis protein II      | <b>-0.07</b> | 0.93023 |
| STM1920   | cheW    | chemotaxis docking protein                  | <b>-0.14</b> | 0.73855 |
| STM1920   | cheW    | chemotaxis docking protein                  | <b>-0.12</b> | 0.80002 |
| STM1921   | cheA    | chemotaxis sensory histidine protein kinase | <b>0.14</b>  | 0.78973 |
| STM1921   | cheA    | chemotaxis sensory histidine protein kinase | <b>0.27</b>  | 0.48062 |
| STM1922   | motB    | flagellar motor protein                     | <b>0.14</b>  | 0.70122 |
| STM1922   | motB    | flagellar motor protein                     | <b>0.31</b>  | 0.47844 |
| STM1923   | motA    | flagellar motor protein                     | <b>-0.26</b> | 0.50759 |
| STM1923   | motA    | flagellar motor protein                     | <b>-0.19</b> | 0.63156 |
| STM1924,S | flhC    | flagellar transcriptional activator         | <b>0.13</b>  | 0.75739 |
| STM1924,S | flhC    | flagellar transcriptional activator         | <b>0.53</b>  | 0.26512 |
| STM1925   | flhD    | transcriptional activator FlhD              | <b>0.40</b>  | 0.41154 |
| STM1925   | flhD    | transcriptional activator FlhD              | <b>0.41</b>  | 0.42277 |
| STM1927   | yecG    | putative universal stress protein           | <b>0.05</b>  | 0.93485 |
| STM1927   | yecG    | putative universal stress protein           | <b>0.26</b>  | 0.54169 |
| STM1928   | otsA    | trehalose-6-phosphate synthase              | <b>1.03</b>  | 0.29871 |
| STM1928   | otsA    | trehalose-6-phosphate synthase              | <b>1.18</b>  | 0.19843 |
| STM1929   | otsB    | trehalose-6-phosphate phosphatase           | <b>-0.21</b> | 0.71690 |
| STM1929   | otsB    | trehalose-6-phosphate phosphatase           | <b>0.71</b>  | 0.25382 |
| STM1931   | araH    | putative intracellular protease/amidase     | <b>0.22</b>  | 0.86396 |
| STM1931   | araH    | putative intracellular protease/amidase     | <b>0.75</b>  | 0.13824 |
| STM1932   | ftnB    | ferritin-like protein                       | <b>0.04</b>  | 0.94360 |
| STM1932   | ftnB    | ferritin-like protein                       | <b>0.52</b>  | 0.44745 |
| STM1933   | STM1933 | hypothetical protein STM1933                | <b>-0.31</b> | 0.42344 |
| STM1933   | STM1933 | hypothetical protein STM1933                | <b>0.16</b>  | 0.80406 |
| STM1934   | STM1934 | putative outer membrane lipoprotein         | <b>-0.04</b> | 0.93811 |
| STM1934   | STM1934 | putative outer membrane lipoprotein         | <b>-0.03</b> | 0.94060 |
| STM1935   | ftn     | cytoplasmic ferritin                        | <b>-0.24</b> | 0.61965 |
| STM1935   | ftn     | cytoplasmic ferritin                        | <b>0.04</b>  | 0.96785 |
| STM1936   | yecH    | putative cytoplasmic protein                | <b>-0.44</b> | 0.26690 |
| STM1936   | yecH    | putative cytoplasmic protein                | <b>-0.35</b> | 0.56245 |
| STM1937   | tyrP    | tyrosine-specific transport protein         | <b>-0.20</b> | 0.67473 |
| STM1937   | tyrP    | tyrosine-specific transport protein         | <b>-0.12</b> | 0.78452 |
| STM1938   | yecA    | putative metal-binding protein              | <b>-0.93</b> | 0.13645 |
| STM1938   | yecA    | putative metal-binding protein              | <b>0.00</b>  | 0.99887 |
| STM1939   | STM1939 | putative glucose-6-phosphate dehydrogenase  | <b>-0.40</b> | 0.35824 |
| STM1939   | STM1939 | putative glucose-6-phosphate dehydrogenase  | <b>-0.64</b> | 0.17139 |
| STM1940   | STM1940 | putative cell wall-associated hydrolase     | <b>-0.12</b> | 0.80341 |
| STM1940   | STM1940 | putative cell wall-associated hydrolase     | <b>-0.29</b> | 0.45800 |
| STM1941   | STM1941 | putative inner membrane protein             | <b>-0.52</b> | 0.20271 |
| STM1941   | STM1941 | putative inner membrane protein             | <b>-0.22</b> | 0.55956 |
| STM1942   | leuZ    | STM1942                                     | <b>-0.37</b> | 0.45462 |
| STM1942   | leuZ    | STM1942                                     | <b>0.07</b>  | 0.93975 |
| STM1943   | cysT    | STM1943                                     | <b>-0.69</b> | 0.26910 |
| STM1943   | cysT    | STM1943                                     | <b>-0.35</b> | 0.48994 |
| STM1944   | glyW    | STM1944                                     | <b>-0.36</b> | 0.69633 |
| STM1944   | glyW    | STM1944                                     | <b>-0.46</b> | 0.56048 |
| STM1944   | glyW    | STM1944                                     | <b>-0.42</b> | 0.49035 |
| STM1944   | glyW    | STM1944                                     | <b>-0.60</b> | 0.31280 |

|         |      |                                                     |              |         |
|---------|------|-----------------------------------------------------|--------------|---------|
| STM1944 | glyW | STM1944                                             | <b>-0.31</b> | 0.51267 |
| STM1944 | glyW | STM1944                                             | <b>-0.45</b> | 0.37154 |
| STM1944 | glyW | STM1944                                             | <b>-0.42</b> | 0.28799 |
| STM1944 | glyW | STM1944                                             | <b>-0.23</b> | 0.58506 |
| STM1945 | pgsA | phosphatidylglycerophosphate synthetase             | <b>-0.10</b> | 0.80306 |
| STM1945 | pgsA | phosphatidylglycerophosphate synthetase             | <b>0.06</b>  | 0.89624 |
| STM1946 | uvrC | excinuclease ABC subunit C                          | <b>0.04</b>  | 0.94050 |
| STM1946 | uvrC | excinuclease ABC subunit C                          | <b>0.25</b>  | 0.61679 |
| STM1947 | uvrY | response regulator                                  | <b>-0.06</b> | 0.91996 |
| STM1947 | uvrY | response regulator                                  | <b>0.17</b>  | 0.70140 |
| STM1949 | yecF | putative cytoplasmic protein                        | <b>-0.42</b> | 0.26213 |
| STM1949 | yecF | putative cytoplasmic protein                        | <b>-0.03</b> | 0.95876 |
| STM1950 | sdiA | transcriptional regulator                           | <b>-0.27</b> | 0.58108 |
| STM1950 | sdiA | transcriptional regulator                           | <b>-0.27</b> | 0.47610 |
|         |      | putative ABC-type polar amino acid transport system |              |         |
| STM1951 | yecC | ATPase                                              | <b>0.05</b>  | 0.92403 |
|         |      | putative ABC-type polar amino acid transport system |              |         |
| STM1951 | yecC | ATPase                                              | <b>0.19</b>  | 0.72219 |
|         |      | putative ABC-type amino acid transporter permease   |              |         |
| STM1952 | yecS | component                                           | <b>-0.59</b> | 0.15529 |
|         |      | putative ABC-type amino acid transporter permease   |              |         |
| STM1952 | yecS | component                                           | <b>-0.33</b> | 0.41284 |
| STM1953 | yedO | D-cysteine desulfhydrase                            | <b>-0.16</b> | 0.74436 |
| STM1953 | yedO | D-cysteine desulfhydrase                            | <b>0.64</b>  | 0.23613 |
| STM1954 | fliY | putative periplasmic binding transport protein      | <b>0.16</b>  | 0.69776 |
| STM1954 | fliY | putative periplasmic binding transport protein      | <b>0.33</b>  | 0.58766 |
| STM1955 | fliZ | putative FliA-regulator                             | <b>0.07</b>  | 0.94765 |
| STM1955 | fliZ | putative FliA-regulator                             | <b>0.54</b>  | 0.18140 |
| STM1956 | fliA | flagellar biosynthesis sigma factor FliA            | <b>0.11</b>  | 0.84854 |
| STM1956 | fliA | flagellar biosynthesis sigma factor FliA            | <b>0.60</b>  | 0.14723 |
| STM1958 | fliB | lysine-N-methylase                                  | <b>0.19</b>  | 0.66310 |
| STM1958 | fliB | lysine-N-methylase                                  | <b>0.27</b>  | 0.57804 |
| STM1959 | fliC | flagellar biosynthesis protein                      | <b>0.08</b>  | 0.87512 |
| STM1959 | fliC | flagellar biosynthesis protein                      | <b>0.22</b>  | 0.72247 |
| STM1960 | fliD | flagellar hook-associated protein                   | <b>0.29</b>  | 0.43731 |
| STM1960 | fliD | flagellar hook-associated protein                   | <b>0.50</b>  | 0.28024 |
| STM1961 | fliS | flagellar protein FliS                              | <b>0.30</b>  | 0.62265 |
| STM1961 | fliS | flagellar protein FliS                              | <b>-0.11</b> | 0.91900 |
| STM1962 | fliT | possible FliD export chaperone                      | <b>-0.15</b> | 0.68434 |
| STM1962 | fliT | possible FliD export chaperone                      | <b>0.43</b>  | 0.30422 |
| STM1963 | amyA | cytoplasmic alpha-amylase                           | <b>-0.40</b> | 0.27753 |
| STM1963 | amyA | cytoplasmic alpha-amylase                           | <b>-0.13</b> | 0.83443 |
| STM1964 | yedD | putative outer membrane lipoprotein                 | <b>-1.10</b> | 0.17359 |
| STM1964 | yedD | putative outer membrane lipoprotein                 | <b>0.04</b>  | 0.94316 |
| STM1965 | yedE | hypothetical protein STM1965                        | <b>-0.01</b> | 0.98489 |
| STM1965 | yedE | hypothetical protein STM1965                        | <b>-0.08</b> | 0.86580 |
| STM1966 | yedF | putative transcriptional regulator                  | <b>-0.18</b> | 0.77186 |
| STM1966 | yedF | putative transcriptional regulator                  | <b>0.19</b>  | 0.74268 |
| STM1968 | fliE | flagellar basal body protein                        | <b>0.15</b>  | 0.78665 |
| STM1968 | fliE | flagellar basal body protein                        | <b>0.25</b>  | 0.57076 |
| STM1969 | fliF | flagellar M-ring protein                            | <b>-0.30</b> | 0.48388 |
| STM1969 | fliF | flagellar M-ring protein                            | <b>0.02</b>  | 0.97364 |
| STM1970 | fliG | flagellar motor protein                             | <b>0.08</b>  | 0.83700 |
| STM1970 | fliG | flagellar motor protein                             | <b>0.26</b>  | 0.54624 |
| STM1971 | fliH | flagellar assembly protein                          | <b>-0.14</b> | 0.70185 |
| STM1971 | fliH | flagellar assembly protein                          | <b>0.26</b>  | 0.49870 |
| STM1972 | fliI | flagellum-specific ATP synthase                     | <b>0.01</b>  | 0.98066 |
| STM1972 | fliI | flagellum-specific ATP synthase                     | <b>0.16</b>  | 0.77818 |
| STM1973 | fliJ | flagellar protein                                   | <b>-0.37</b> | 0.41154 |
| STM1973 | fliJ | flagellar protein                                   | <b>0.13</b>  | 0.75529 |
| STM1974 | fliK | flagellar hook-length control protein               | <b>0.03</b>  | 0.95360 |
| STM1974 | fliK | flagellar hook-length control protein               | <b>0.19</b>  | 0.63301 |
| STM1975 | fliL | flagellar biosynthesis protein                      | <b>0.10</b>  | 0.86385 |

|           |           |                                                         |              |         |
|-----------|-----------|---------------------------------------------------------|--------------|---------|
| STM1975   | fliL      | flagellar biosynthesis protein                          | <b>0.23</b>  | 0.61201 |
| STM1976   | fliM      | flagellar motor switch protein                          | <b>-0.01</b> | 0.98212 |
| STM1976   | fliM      | flagellar motor switch protein                          | <b>-0.11</b> | 0.77002 |
| STM1977   | fliN      | flagellar motor switch protein                          | <b>0.05</b>  | 0.91236 |
| STM1977   | fliN      | flagellar motor switch protein                          | <b>0.03</b>  | 0.96228 |
| STM1978   | fliO      | flagellar biosynthetic protein                          | <b>-0.14</b> | 0.76720 |
| STM1978   | fliO      | flagellar biosynthetic protein                          | <b>-0.06</b> | 0.91170 |
| STM1979   | fliP      | flagellar biosynthesis protein                          | <b>0.19</b>  | 0.66506 |
| STM1979   | fliP      | flagellar biosynthesis protein                          | <b>0.51</b>  | 0.26771 |
| STM1980   | fliQ      | flagellar biosynthesis protein                          | <b>0.40</b>  | 0.34051 |
| STM1980   | fliQ      | flagellar biosynthesis protein                          | <b>0.39</b>  | 0.36991 |
| STM1981   | fliR      | flagellar biosynthesis protein                          | <b>-0.21</b> | 0.64525 |
| STM1981   | fliR      | flagellar biosynthesis protein                          | <b>-0.21</b> | 0.74178 |
| STM1982   | rcsA      | colanic acid capsular biosynthesis activation protein A | <b>0.62</b>  | 0.15589 |
| STM1982   | rcsA      | colanic acid capsular biosynthesis activation protein A | <b>0.57</b>  | 0.53827 |
| STM1983   | dsrB      | hypothetical protein STM1983                            | <b>-0.36</b> | 0.48600 |
| STM1983   | dsrB      | hypothetical protein STM1983                            | <b>0.18</b>  | 0.73473 |
| STM1984   | yodD      | putative cytoplasmic protein                            | <b>0.82</b>  | 0.17603 |
| STM1984   | yodD      | putative cytoplasmic protein                            | <b>0.98</b>  | 0.30018 |
| STM1986   | yedP      | hypothetical protein STM1986                            | <b>0.05</b>  | 0.93841 |
| STM1986   | yedP      | hypothetical protein STM1986                            | <b>0.28</b>  | 0.63101 |
| STM1987   | STM1987   | putative inner membrane protein                         | <b>-0.10</b> | 0.90776 |
| STM1987   | STM1987   | putative inner membrane protein                         | <b>0.17</b>  | 0.71690 |
| STM1988,S | STM1988,S | putative cytoplasmic protein                            | <b>0.19</b>  | 0.83998 |
| STM1988,S | STM1988,S | putative cytoplasmic protein                            | <b>1.06</b>  | 0.55008 |
| STM1989   | yedI      | putative inner membrane protein                         | <b>0.11</b>  | 0.84687 |
| STM1989   | yedI      | putative inner membrane protein                         | <b>0.16</b>  | 0.76538 |
| STM1990   | yedA      | putative permease                                       | <b>-0.19</b> | 0.62861 |
| STM1990   | yedA      | putative permease                                       | <b>0.63</b>  | 0.22060 |
| STM1991   | vsr       | DNA mismatch endonuclease                               | <b>-0.36</b> | 0.61892 |
| STM1991   | vsr       | DNA mismatch endonuclease                               | <b>0.36</b>  | 0.41286 |
| STM1992   | dcm       | DNA cytosine methylase                                  | <b>-0.03</b> | 0.94880 |
| STM1992   | dcm       | DNA cytosine methylase                                  | <b>0.95</b>  | 0.15276 |
| STM1993   | yedJ      | putative hydrolase                                      | <b>0.10</b>  | 0.85601 |
| STM1993   | yedJ      | putative hydrolase                                      | <b>-0.02</b> | 0.97270 |
| STM1994   | STM1994   | putative inner membrane protein                         | <b>-0.42</b> | 0.37154 |
| STM1994   | STM1994   | putative inner membrane protein                         | <b>-0.21</b> | 0.58788 |
| STM1995   | ompS      | putative porin                                          | <b>0.13</b>  | 0.73473 |
| STM1995   | ompS      | putative porin                                          | <b>0.41</b>  | 0.47897 |
| STM1996   | cspB      | putative cold-shock protein                             | <b>0.51</b>  | 0.38314 |
| STM1996   | cspB      | putative cold-shock protein                             | <b>0.46</b>  | 0.43548 |
| STM1997   | umuC      | DNA polymerase IV                                       | <b>-0.37</b> | 0.42277 |
| STM1997   | umuC      | DNA polymerase IV                                       | <b>-0.79</b> | 0.39316 |
| STM1997   | umuC      | DNA polymerase IV                                       | <b>-0.28</b> | 0.57089 |
| STM1997   | umuC      | DNA polymerase IV                                       | <b>-0.41</b> | 0.35366 |
| STM1998   | umuD      | SOS-response transcriptional repressors                 | <b>-0.25</b> | 0.55393 |
| STM1998   | umuD      | SOS-response transcriptional repressors                 | <b>0.69</b>  | 0.23892 |
| STM1999   | STM1999   | putative cytoplasmic protein                            | <b>-0.42</b> | 0.63688 |
| STM1999   | STM1999   | putative cytoplasmic protein                            | <b>0.23</b>  | 0.65980 |
| STM2000   | serU      | STM2000                                                 | <b>-0.73</b> | 0.25561 |
| STM2000   | serU      | STM2000                                                 | <b>-0.37</b> | 0.60936 |
| STM2001   | yeel      | putative inner membrane protein                         | <b>0.27</b>  | 0.50811 |
| STM2001   | yeel      | putative inner membrane protein                         | <b>0.36</b>  | 0.40819 |
| STM2005   | STM2005   | putative endoprotease                                   | <b>-1.32</b> | 0.11913 |
| STM2005   | STM2005   | putative endoprotease                                   | <b>-0.39</b> | 0.48432 |
| STM2007   | STM2007   | tetratricopeptide repeat protein                        | <b>-0.34</b> | 0.36017 |
| STM2007   | STM2007   | tetratricopeptide repeat protein                        | <b>0.43</b>  | 0.59422 |
| STM2008   | STM2008   | putative periplasmic protein                            | <b>-0.50</b> | 0.24926 |
| STM2008   | STM2008   | putative periplasmic protein                            | <b>0.46</b>  | 0.48810 |
| STM2009   | amn       | AMP nucleosidase                                        | <b>0.03</b>  | 0.96364 |
| STM2009   | amn       | AMP nucleosidase                                        | <b>-0.27</b> | 0.57568 |
| STM2011   | STM2011   | putative cytoplasmic protein                            | <b>-0.40</b> | 0.45947 |
| STM2011   | STM2011   | putative cytoplasmic protein                            | <b>0.03</b>  | 0.97348 |

|         |      |                                              |              |         |
|---------|------|----------------------------------------------|--------------|---------|
| STM2013 | yeeO | putative transport protein                   | <b>0.25</b>  | 0.53497 |
| STM2013 | yeeO | putative transport protein                   | <b>0.24</b>  | 0.72843 |
| STM2014 | asnU | STM2014                                      | <b>-1.35</b> | 0.10149 |
| STM2014 | asnU | STM2014                                      | <b>0.07</b>  | 0.89878 |
| STM2014 | asnU | STM2014                                      | <b>-0.72</b> | 0.15276 |
| STM2014 | asnU | STM2014                                      | <b>-0.96</b> | 0.15859 |
| STM2014 | asnU | STM2014                                      | <b>-0.39</b> | 0.30956 |
| STM2014 | asnU | STM2014                                      | <b>0.62</b>  | 0.32481 |
| STM2014 | asnU | STM2014                                      | <b>-0.63</b> | 0.35373 |
| STM2014 | asnU | STM2014                                      | <b>-0.60</b> | 0.32673 |
| STM2015 | erfK | putative periplasmic protein                 | <b>-0.30</b> | 0.46267 |
| STM2015 | erfK | putative periplasmic protein                 | <b>0.02</b>  | 0.96785 |
| STM2016 | cobT | nicotinate-nucleotide--dimethylbenzimidazole | <b>-0.16</b> | 0.78257 |
| STM2016 | cobT | nicotinate-nucleotide--dimethylbenzimidazole | <b>0.64</b>  | 0.26378 |
| STM2017 | cobS | cobalamin synthase                           | <b>0.60</b>  | 0.29044 |
| STM2017 | cobS | cobalamin synthase                           | <b>0.34</b>  | 0.67785 |
| STM2018 | cobU | adenosylcobinamide kinase                    | <b>-0.03</b> | 0.98026 |
| STM2018 | cobU | adenosylcobinamide kinase                    | <b>0.17</b>  | 0.83525 |
| STM2019 | cbiP | cobyric acid synthase                        | <b>-0.72</b> | 0.19398 |
| STM2019 | cbiP | cobyric acid synthase                        | <b>0.26</b>  | 0.60174 |
| STM2020 | cbiO | vitamin B12 biosynthetic protein             | <b>-0.57</b> | 0.21293 |
| STM2020 | cbiO | vitamin B12 biosynthetic protein             | <b>-0.20</b> | 0.65730 |
| STM2021 | cbiQ | vitamin B12 biosynthetic protein             | <b>-0.17</b> | 0.66677 |
| STM2021 | cbiQ | vitamin B12 biosynthetic protein             | <b>-0.12</b> | 0.78718 |
| STM2022 | cbiN | cobalt transport protein CbiN                | <b>0.13</b>  | 0.74354 |
| STM2022 | cbiN | cobalt transport protein CbiN                | <b>0.79</b>  | 0.11913 |
| STM2023 | cbiM | cobalt transport protein CbiM                | <b>0.01</b>  | 0.98894 |
| STM2023 | cbiM | cobalt transport protein CbiM                | <b>0.16</b>  | 0.86580 |
| STM2024 | cbiL | precorrin-2 methyltransferase                | <b>-0.64</b> | 0.29543 |
| STM2024 | cbiL | precorrin-2 methyltransferase                | <b>0.10</b>  | 0.85433 |
| STM2025 | cbiK | vitamin B12 biosynthetic protein             | <b>0.12</b>  | 0.77801 |
| STM2025 | cbiK | vitamin B12 biosynthetic protein             | <b>0.29</b>  | 0.53832 |
| STM2026 | cbiJ | precorrin-6x reductase                       | <b>0.16</b>  | 0.80415 |
| STM2026 | cbiJ | precorrin-6x reductase                       | <b>0.99</b>  | 0.27834 |
| STM2027 | cbiH | precorrin-3B C17-methyltransferase           | <b>-0.57</b> | 0.37225 |
| STM2027 | cbiH | precorrin-3B C17-methyltransferase           | <b>0.01</b>  | 0.98551 |
| STM2028 | cbiG | cobalamin biosynthesis protein CbiG          | <b>-0.36</b> | 0.56535 |
| STM2028 | cbiG | cobalamin biosynthesis protein CbiG          | <b>0.39</b>  | 0.36341 |
| STM2029 | cbiF | vitamin B12 biosynthetic protein             | <b>0.45</b>  | 0.75158 |
| STM2029 | cbiF | vitamin B12 biosynthetic protein             | <b>1.49</b>  | 0.11224 |
| STM2030 | cbiT | precorrin-8w decarboxylase                   | <b>-0.10</b> | 0.88998 |
| STM2030 | cbiT | precorrin-8w decarboxylase                   | <b>0.51</b>  | 0.59527 |
| STM2031 | cbiE | precorrin-6B methylase                       | <b>-0.11</b> | 0.87016 |
| STM2031 | cbiE | precorrin-6B methylase                       | <b>0.04</b>  | 0.95608 |
| STM2032 | cbiD | cobalt-precorrin-6A synthase                 | <b>0.05</b>  | 0.95046 |
| STM2032 | cbiD | cobalt-precorrin-6A synthase                 | <b>0.32</b>  | 0.42591 |
| STM2033 | cbiC | precorrin-8X methylmutase                    | <b>-0.06</b> | 0.94087 |
| STM2033 | cbiC | precorrin-8X methylmutase                    | <b>0.19</b>  | 0.64730 |
| STM2034 | cobD | cobalamin biosynthesis protein               | <b>0.12</b>  | 0.77186 |
| STM2034 | cobD | cobalamin biosynthesis protein               | <b>0.90</b>  | 0.18763 |
| STM2035 | cbiA | cobyric acid a,c-diamide synthase            | <b>-0.14</b> | 0.71690 |
| STM2035 | cbiA | cobyric acid a,c-diamide synthase            | <b>0.15</b>  | 0.84456 |
| STM2036 | pocR | transcriptional regulator                    | <b>-0.30</b> | 0.55956 |
| STM2036 | pocR | transcriptional regulator                    | <b>0.14</b>  | 0.84911 |
| STM2037 | pduF | propanediol diffusion facilitator            | <b>0.17</b>  | 0.74381 |
| STM2037 | pduF | propanediol diffusion facilitator            | <b>0.13</b>  | 0.77336 |
| STM2038 | pduA | polyhedral body protein                      | <b>-0.26</b> | 0.76325 |
| STM2038 | pduA | polyhedral body protein                      | <b>0.54</b>  | 0.45848 |
| STM2039 | pudB | polyhedral body protein                      | <b>0.07</b>  | 0.93582 |
| STM2039 | pudB | polyhedral body protein                      | <b>0.42</b>  | 0.32673 |
| STM2040 | pduC | propanediol dehydratase large subunit        | <b>-0.82</b> | 0.32172 |
| STM2040 | pduC | propanediol dehydratase large subunit        | <b>0.16</b>  | 0.86516 |
| STM2041 | pduD | propanediol dehydratase medium subunit       | <b>-0.19</b> | 0.83926 |

|         |      |                                                  |              |         |
|---------|------|--------------------------------------------------|--------------|---------|
| STM2041 | pduD | propanediol dehydratase medium subunit           | <b>0.27</b>  | 0.56103 |
| STM2042 | pduE | propanediol dehydratase small subunit            | <b>0.28</b>  | 0.65305 |
| STM2042 | pduE | propanediol dehydratase small subunit            | <b>-0.04</b> | 0.93688 |
| STM2043 | pduG | propanediol dehydratase reactivation protein     | <b>-0.56</b> | 0.50458 |
| STM2043 | pduG | propanediol dehydratase reactivation protein     | <b>0.41</b>  | 0.53827 |
| STM2044 | pduH | propanediol dehydratase reactivation protein     | <b>-0.93</b> | 0.12273 |
| STM2044 | pduH | propanediol dehydratase reactivation protein     | <b>-0.24</b> | 0.74807 |
| STM2045 | pduJ | polyhedral body protein                          | <b>-0.37</b> | 0.32675 |
| STM2045 | pduJ | polyhedral body protein                          | <b>0.50</b>  | 0.39861 |
| STM2046 | pduK | polyhedral body protein                          | <b>-0.38</b> | 0.43772 |
| STM2046 | pduK | polyhedral body protein                          | <b>0.49</b>  | 0.29796 |
| STM2047 | pduL | propanediol utilization protein                  | <b>0.09</b>  | 0.84103 |
| STM2047 | pduL | propanediol utilization protein                  | <b>1.12</b>  | 0.13645 |
| STM2048 | pduM | propanediol utilization protein                  | <b>0.14</b>  | 0.81455 |
| STM2048 | pduM | propanediol utilization protein                  | <b>0.28</b>  | 0.44208 |
| STM2049 | pduN | polyhedral body protein                          | <b>-0.25</b> | 0.56618 |
| STM2049 | pduN | polyhedral body protein                          | <b>0.31</b>  | 0.70323 |
| STM2050 | pduO | propanediol utilization protein                  | <b>-0.19</b> | 0.65025 |
| STM2050 | pduO | propanediol utilization protein                  | <b>0.90</b>  | 0.23398 |
| STM2051 | pduP | CoA-dependent propionaldehyde dehydrogenase      | <b>-0.35</b> | 0.40930 |
| STM2051 | pduP | CoA-dependent propionaldehyde dehydrogenase      | <b>0.11</b>  | 0.87135 |
| STM2052 | pduQ | propanol dehydrogenase                           | <b>0.15</b>  | 0.84788 |
| STM2052 | pduQ | propanol dehydrogenase                           | <b>0.67</b>  | 0.35564 |
| STM2053 | pduS | polyhedral body protein                          | <b>0.09</b>  | 0.89393 |
| STM2053 | pduS | polyhedral body protein                          | <b>0.52</b>  | 0.29284 |
| STM2054 | pduT | polyhedral body protein                          | <b>0.12</b>  | 0.83443 |
| STM2054 | pduT | polyhedral body protein                          | <b>0.97</b>  | 0.19398 |
| STM2055 | pduU | polyhedral body protein                          | <b>0.85</b>  | 0.26213 |
| STM2055 | pduU | polyhedral body protein                          | <b>1.16</b>  | 0.32016 |
| STM2056 | pduV | propanediol utilization protein                  | <b>-0.16</b> | 0.68929 |
| STM2056 | pduV | propanediol utilization protein                  | <b>0.98</b>  | 0.22602 |
| STM2057 | pduW | acetate/propionate kinase                        | <b>-0.09</b> | 0.85288 |
| STM2057 | pduW | acetate/propionate kinase                        | <b>0.18</b>  | 0.65040 |
| STM2058 | pduX | propanediol utilization protein                  | <b>-0.50</b> | 0.39577 |
| STM2058 | pduX | propanediol utilization protein                  | <b>0.05</b>  | 0.91917 |
| STM2059 | yeeX | hypothetical protein STM2059                     | <b>-0.24</b> | 0.60574 |
| STM2059 | yeeX | hypothetical protein STM2059                     | <b>-0.21</b> | 0.55978 |
| STM2060 | yeeA | putative inner membrane protein                  | <b>-0.38</b> | 0.37310 |
| STM2060 | yeeA | putative inner membrane protein                  | <b>0.17</b>  | 0.70077 |
| STM2061 | sbmC | DNA gyrase inhibitor                             | <b>-0.13</b> | 0.71971 |
| STM2061 | sbmC | DNA gyrase inhibitor                             | <b>0.33</b>  | 0.38668 |
| STM2062 | dacD | DD-carboxypeptidase                              | <b>-0.17</b> | 0.76921 |
| STM2062 | dacD | DD-carboxypeptidase                              | <b>0.33</b>  | 0.45797 |
| STM2063 | phsC | thiosulfate reductase cytochrome B subunit       | <b>-0.14</b> | 0.74374 |
| STM2063 | phsC | thiosulfate reductase cytochrome B subunit       | <b>0.31</b>  | 0.51952 |
| STM2064 | phsB | thiosulfate reductase electron transport protein | <b>-0.23</b> | 0.61723 |
| STM2064 | phsB | thiosulfate reductase electron transport protein | <b>0.26</b>  | 0.67551 |
| STM2065 | phsA | thiosulfate reductase precursor                  | <b>-0.38</b> | 0.51973 |
| STM2065 | phsA | thiosulfate reductase precursor                  | <b>0.71</b>  | 0.14928 |
| STM2066 | sopA | secreted effector protein                        | <b>0.00</b>  | 0.99887 |
| STM2066 | sopA | secreted effector protein                        | <b>0.24</b>  | 0.65305 |
| STM2067 | sbcB | exonuclease I                                    | <b>-0.21</b> | 0.65519 |
| STM2067 | sbcB | exonuclease I                                    | <b>0.04</b>  | 0.95345 |
| STM2068 | yeeF | putative amino acid transport protein            | <b>-0.46</b> | 0.23042 |
| STM2068 | yeeF | putative amino acid transport protein            | <b>0.09</b>  | 0.82122 |
| STM2069 | yeeY | putative transcriptional regulator               | <b>-0.04</b> | 0.94087 |
| STM2069 | yeeY | putative transcriptional regulator               | <b>0.57</b>  | 0.22602 |
| STM2070 | yeeZ | putative dehydratase                             | <b>-0.34</b> | 0.46184 |
| STM2070 | yeeZ | putative dehydratase                             | <b>-0.19</b> | 0.65012 |
| STM2071 | hisG | ATP phosphoribosyltransferase                    | <b>-0.39</b> | 0.41154 |
| STM2071 | hisG | ATP phosphoribosyltransferase                    | <b>0.16</b>  | 0.73010 |
| STM2072 | hisD | histidinol dehydrogenase                         | <b>-0.28</b> | 0.58472 |
| STM2072 | hisD | histidinol dehydrogenase                         | <b>0.03</b>  | 0.95491 |

|         |      |                                                          |              |         |
|---------|------|----------------------------------------------------------|--------------|---------|
| STM2073 | hisC | histidinol-phosphate aminotransferase                    | <b>0.06</b>  | 0.92074 |
| STM2073 | hisC | histidinol-phosphate aminotransferase                    | <b>-0.01</b> | 0.99381 |
|         |      | imidazole glycerol-phosphate dehydratase/histidinol      |              |         |
| STM2074 | hisB | phosphatase                                              | <b>0.01</b>  | 0.98958 |
|         |      | imidazole glycerol-phosphate dehydratase/histidinol      |              |         |
| STM2074 | hisB | phosphatase                                              | <b>0.06</b>  | 0.91021 |
| STM2075 | hisH | imidazole glycerol phosphate synthase subunit HisH       | <b>-0.13</b> | 0.82400 |
| STM2075 | hisH | imidazole glycerol phosphate synthase subunit HisH       | <b>0.31</b>  | 0.47474 |
|         |      | 1-(5-phosphoribosyl)-5-[(5-                              |              |         |
| STM2076 | hisA | phosphoribosylamino)methylideneamino]                    | <b>-0.02</b> | 0.96785 |
|         |      | 1-(5-phosphoribosyl)-5-[(5-                              |              |         |
| STM2076 | hisA | phosphoribosylamino)methylideneamino]                    | <b>0.19</b>  | 0.61654 |
| STM2077 | hisF | imidazole glycerol phosphate synthase subunit HisF       | <b>0.00</b>  | 0.99992 |
| STM2077 | hisF | imidazole glycerol phosphate synthase subunit HisF       | <b>-0.13</b> | 0.79741 |
|         |      | bifunctional phosphoribosyl-AMP                          |              |         |
| STM2078 | hisI | cyclohydrolase/phosphoribosyl-ATP                        | <b>-0.24</b> | 0.52218 |
|         |      | bifunctional phosphoribosyl-AMP                          |              |         |
| STM2078 | hisI | cyclohydrolase/phosphoribosyl-ATP                        | <b>0.16</b>  | 0.74906 |
| STM2079 | wzzB | lipopolysaccharide O-antigen chain length regulator      | <b>-0.38</b> | 0.37154 |
| STM2079 | wzzB | lipopolysaccharide O-antigen chain length regulator      | <b>0.05</b>  | 0.93023 |
| STM2080 | udg  | UDP-glucose/GDP-mannose dehydrogenase                    | <b>-0.33</b> | 0.39962 |
| STM2080 | udg  | UDP-glucose/GDP-mannose dehydrogenase                    | <b>-0.33</b> | 0.55111 |
| STM2081 | gnd  | 6-phosphogluconate dehydrogenase                         | <b>0.04</b>  | 0.93420 |
| STM2081 | gnd  | 6-phosphogluconate dehydrogenase                         | <b>0.10</b>  | 0.80588 |
|         |      | undecaprenol-phosphate                                   |              |         |
| STM2082 | rfbP | galactosephosphotransferase/O-antigen                    | <b>0.17</b>  | 0.67351 |
|         |      | undecaprenol-phosphate                                   |              |         |
| STM2082 | rfbP | galactosephosphotransferase/O-antigen                    | <b>-0.09</b> | 0.83897 |
| STM2083 | rfbK | phosphomannomutase                                       | <b>0.01</b>  | 0.98539 |
| STM2083 | rfbK | phosphomannomutase                                       | <b>0.09</b>  | 0.83545 |
| STM2084 | rfbM | mannose-1-phosphate guanylyltransferase                  | <b>-0.07</b> | 0.91019 |
| STM2084 | rfbM | mannose-1-phosphate guanylyltransferase                  | <b>0.25</b>  | 0.65245 |
| STM2085 | rfbN | rhamnosyl transferase                                    | <b>0.37</b>  | 0.40947 |
| STM2085 | rfbN | rhamnosyl transferase                                    | <b>0.33</b>  | 0.35757 |
| STM2086 | rfbU | mannosyl transferase                                     | <b>0.12</b>  | 0.75309 |
| STM2086 | rfbU | mannosyl transferase                                     | <b>0.19</b>  | 0.60014 |
| STM2087 | rfbV | abequosyltransferase                                     | <b>0.32</b>  | 0.57123 |
| STM2087 | rfbV | abequosyltransferase                                     | <b>-0.23</b> | 0.59325 |
| STM2088 | rfbX | putative O-antigen transferase                           | <b>0.22</b>  | 0.56879 |
| STM2088 | rfbX | putative O-antigen transferase                           | <b>0.07</b>  | 0.87438 |
| STM2089 | rfbJ | CDP-abequose synthase                                    | <b>0.15</b>  | 0.71935 |
| STM2089 | rfbJ | CDP-abequose synthase                                    | <b>0.18</b>  | 0.67473 |
| STM2090 | rfbH | CDP-6-deoxy-D-xyl-4-hexulose-3-dehydrase                 | <b>0.10</b>  | 0.84783 |
| STM2090 | rfbH | CDP-6-deoxy-D-xyl-4-hexulose-3-dehydrase                 | <b>0.10</b>  | 0.85053 |
| STM2091 | rfbG | CDP glucose 4,6-dehydratase                              | <b>-0.01</b> | 0.99268 |
| STM2091 | rfbG | CDP glucose 4,6-dehydratase                              | <b>0.15</b>  | 0.80831 |
| STM2092 | rfbF | glucose-1-phosphate cytidyltransferase                   | <b>-0.10</b> | 0.82145 |
| STM2092 | rfbF | glucose-1-phosphate cytidyltransferase                   | <b>0.08</b>  | 0.88764 |
| STM2093 | rfbI | CDP-6-deoxy-delta-3,4-glucoseen reductase                | <b>0.44</b>  | 0.35816 |
| STM2093 | rfbI | CDP-6-deoxy-delta-3,4-glucoseen reductase                | <b>0.07</b>  | 0.86190 |
| STM2094 | rfbC | dTDP-4,deoxyrhamnose 3,5 epimerase                       | <b>0.27</b>  | 0.53263 |
| STM2094 | rfbC | dTDP-4,deoxyrhamnose 3,5 epimerase                       | <b>0.26</b>  | 0.45111 |
| STM2095 | rfbA | dTDP-glucose pyrophosphorylase                           | <b>0.02</b>  | 0.97140 |
| STM2095 | rfbA | dTDP-glucose pyrophosphorylase                           | <b>0.73</b>  | 0.19138 |
| STM2096 | rfbD | TDP-rhamnose synthetase                                  | <b>0.19</b>  | 0.74626 |
| STM2096 | rfbD | TDP-rhamnose synthetase                                  | <b>0.37</b>  | 0.48199 |
| STM2097 | rfbB | dTDP-glucose 4,6-dehydratase                             | <b>0.17</b>  | 0.72247 |
| STM2097 | rfbB | dTDP-glucose 4,6-dehydratase                             | <b>0.11</b>  | 0.78982 |
| STM2098 | galF | putative glucose-1-phosphate uridylyltransferase subunit | <b>-0.35</b> | 0.38317 |
| STM2098 | galF | putative glucose-1-phosphate uridylyltransferase subunit | <b>0.20</b>  | 0.59416 |
| STM2099 | wcaM | putative colanic acid biosynthetic protein               | <b>-0.03</b> | 0.97168 |
| STM2099 | wcaM | putative colanic acid biosynthetic protein               | <b>0.26</b>  | 0.64524 |
| STM2100 | wcaL | putative glycosyl transferase                            | <b>-0.14</b> | 0.78521 |

|           |         |                                                           |              |         |
|-----------|---------|-----------------------------------------------------------|--------------|---------|
| STM2100   | wcaL    | putative glycosyl transferase                             | <b>-0.07</b> | 0.88211 |
| STM2101   | wcaK    | putative galactokinase                                    | <b>-0.39</b> | 0.34770 |
| STM2101   | wcaK    | putative galactokinase                                    | <b>0.71</b>  | 0.21111 |
| STM2102   | wzxC    | putative export                                           | <b>-0.01</b> | 0.97973 |
| STM2102   | wzxC    | putative export                                           | <b>-0.01</b> | 0.99266 |
|           |         | UDP-glucose lipid carrier transferase/glucose-1-phosphate |              |         |
| STM2103   | wcaJ    | phosphate                                                 | <b>-0.30</b> | 0.66489 |
|           |         | UDP-glucose lipid carrier transferase/glucose-1-phosphate |              |         |
| STM2103   | wcaJ    | phosphate                                                 | <b>-0.28</b> | 0.66262 |
| STM2104   | cpsG    | phosphomannomutase                                        | <b>0.18</b>  | 0.76446 |
| STM2104   | cpsG    | phosphomannomutase                                        | <b>0.87</b>  | 0.24973 |
| STM2105,S | manC    | mannose-1-phosphate guanylyltransferase                   | <b>-0.14</b> | 0.81667 |
| STM2105,S | manC    | mannose-1-phosphate guanylyltransferase                   | <b>1.19</b>  | 0.30497 |
| STM2106   | wcaI    | putative glycosyl transferase                             | <b>-0.44</b> | 0.29532 |
| STM2106   | wcaI    | putative glycosyl transferase                             | <b>0.33</b>  | 0.60042 |
| STM2107   | wcaH    | GDP-mannose mannosyl hydrolase                            | <b>0.08</b>  | 0.91082 |
| STM2107   | wcaH    | GDP-mannose mannosyl hydrolase                            | <b>0.78</b>  | 0.21078 |
| STM2108   | wcaG    | GDP-fucose synthetase                                     | <b>-0.03</b> | 0.96640 |
| STM2108   | wcaG    | GDP-fucose synthetase                                     | <b>-0.25</b> | 0.56786 |
| STM2109   | gmd     | GDP-D-mannose dehydratase                                 | <b>-0.59</b> | 0.58841 |
| STM2109   | gmd     | GDP-D-mannose dehydratase                                 | <b>0.03</b>  | 0.96251 |
| STM2110   | wcaF    | putative acyltransferase                                  | <b>0.17</b>  | 0.81325 |
| STM2110   | wcaF    | putative acyltransferase                                  | <b>0.01</b>  | 0.98427 |
| STM2111   | wcaE    | putative transferase                                      | <b>-0.64</b> | 0.26910 |
| STM2111   | wcaE    | putative transferase                                      | <b>0.26</b>  | 0.45664 |
| STM2112   | wcaD    | putative colanic acid polymerase                          | <b>-0.28</b> | 0.43219 |
| STM2112   | wcaD    | putative colanic acid polymerase                          | <b>-0.07</b> | 0.90990 |
| STM2113   | wcaC    | putative glycosyl transferase                             | <b>0.46</b>  | 0.32399 |
| STM2113   | wcaC    | putative glycosyl transferase                             | <b>0.24</b>  | 0.56971 |
| STM2114   | wcaB    | putative acyl transferase                                 | <b>0.93</b>  | 0.11962 |
| STM2114   | wcaB    | putative acyl transferase                                 | <b>1.00</b>  | 0.14030 |
| STM2115   | wcaA    | putative glycosyl transferase                             | <b>1.01</b>  | 0.40121 |
| STM2115   | wcaA    | putative glycosyl transferase                             | <b>1.29</b>  | 0.34051 |
| STM2116   | wzc     | putative tyrosine protein kinase                          | <b>0.14</b>  | 0.95650 |
| STM2116   | wzc     | putative tyrosine protein kinase                          | <b>1.74</b>  | 0.29044 |
| STM2117   | wzb     | putative phosphotyrosine-protein phosphatase              | <b>-0.22</b> | 0.82443 |
| STM2117   | wzb     | putative phosphotyrosine-protein phosphatase              | <b>0.30</b>  | 0.61341 |
| STM2118   | wza     | putative outer membrane polysaccharide export protein     | <b>-0.45</b> | 0.38829 |
| STM2118   | wza     | putative outer membrane polysaccharide export protein     | <b>0.21</b>  | 0.62188 |
| STM2119   | yegH    | putative inner membrane protein                           | <b>-0.96</b> | 0.09135 |
| STM2119   | yegH    | putative inner membrane protein                           | <b>-0.24</b> | 0.66743 |
| STM2120   | asmA    | suppressor of OmpF assembly mutants                       | <b>-0.34</b> | 0.48814 |
| STM2120   | asmA    | suppressor of OmpF assembly mutants                       | <b>0.21</b>  | 0.67351 |
| STM2121   | dcd     | deoxycytidine triphosphate deaminase                      | <b>-0.41</b> | 0.39577 |
| STM2121   | dcd     | deoxycytidine triphosphate deaminase                      | <b>0.35</b>  | 0.43219 |
| STM2122   | udk     | uridine kinase                                            | <b>0.12</b>  | 0.75510 |
| STM2122   | udk     | uridine kinase                                            | <b>0.10</b>  | 0.81763 |
| STM2123   | yegE    | putative diguanylate cyclase/phosphodiesterase            | <b>-0.15</b> | 0.73781 |
| STM2123   | yegE    | putative diguanylate cyclase/phosphodiesterase            | <b>-0.08</b> | 0.87126 |
| STM2124   | alkA    | 3-methyl-adenine DNA glycosylase II                       | <b>-0.36</b> | 0.46787 |
| STM2124   | alkA    | 3-methyl-adenine DNA glycosylase II                       | <b>0.11</b>  | 0.81061 |
| STM2125   | yegD    | putative heat shock protein                               | <b>-0.20</b> | 0.66881 |
| STM2125   | yegD    | putative heat shock protein                               | <b>0.22</b>  | 0.68094 |
| STM2126   | STM2126 | putative secretion protein                                | <b>-0.49</b> | 0.36636 |
| STM2126   | STM2126 | putative secretion protein                                | <b>-0.15</b> | 0.72913 |
| STM2127   | yegN    | putative outer membrane receptor                          | <b>-0.12</b> | 0.81667 |
| STM2127   | yegN    | putative outer membrane receptor                          | <b>0.39</b>  | 0.61201 |
| STM2128   | yegO    | outer membrane putative efflux transporter                | <b>-0.59</b> | 0.28008 |
| STM2128   | yegO    | outer membrane putative efflux transporter                | <b>-0.03</b> | 0.96605 |
| STM2129   | yegB    | putative transport protein                                | <b>-0.38</b> | 0.60052 |
| STM2129   | yegB    | putative transport protein                                | <b>0.12</b>  | 0.74374 |
| STM2130   | baeS    | sensor kinase                                             | <b>-0.08</b> | 0.91900 |
| STM2130   | baeS    | sensor kinase                                             | <b>-0.38</b> | 0.48429 |

|            |            |                                        |              |         |
|------------|------------|----------------------------------------|--------------|---------|
| STM2131    | baeR       | response regulator                     | <b>-0.41</b> | 0.37057 |
| STM2131    | baeR       | response regulator                     | <b>0.47</b>  | 0.49374 |
| STM2133    | STM2133    | putative cytoplasmic protein           | <b>-0.31</b> | 0.63243 |
| STM2133    | STM2133    | putative cytoplasmic protein           | <b>0.78</b>  | 0.28240 |
| STM2134    | STM2134    | putative inner membrane protein        | <b>0.00</b>  | 0.99751 |
| STM2134    | STM2134    | putative inner membrane protein        | <b>0.93</b>  | 0.22733 |
| STM2135    | STM2135    | putative inner membrane protein        | <b>-0.01</b> | 0.98615 |
| STM2135    | STM2135    | putative inner membrane protein        | <b>0.36</b>  | 0.45462 |
| STM2136    | yegQ       | putative protease                      | <b>-0.17</b> | 0.67937 |
| STM2136    | yegQ       | putative protease                      | <b>0.19</b>  | 0.59106 |
| STM2137    | STM2137    | putative cytoplasmic protein           | <b>-0.17</b> | 0.67631 |
| STM2137    | STM2137    | putative cytoplasmic protein           | <b>-0.10</b> | 0.85592 |
| STM2138    | STM2138    | putative cytoplasmic protein           | <b>0.16</b>  | 0.65730 |
| STM2138    | STM2138    | putative cytoplasmic protein           | <b>-0.15</b> | 0.73250 |
| STM2139    | STM2139    | putative inner membrane protein        | <b>-0.25</b> | 0.62988 |
| STM2139    | STM2139    | putative inner membrane protein        | <b>0.36</b>  | 0.55309 |
| STM2139,2n | STM2139,2n | hypothetical protein STM2139,2n        | <b>0.54</b>  | 0.35366 |
| STM2139,2n | STM2139,2n | hypothetical protein STM2139,2n        | <b>0.62</b>  | 0.18763 |
| STM2140    | yegS       | putative diacylglycerol kinase         | <b>0.08</b>  | 0.90513 |
| STM2140    | yegS       | putative diacylglycerol kinase         | <b>0.80</b>  | 0.24290 |
| STM2141    | fbaB       | fructose-bisphosphate aldolase         | <b>-0.56</b> | 0.32760 |
| STM2141    | fbaB       | fructose-bisphosphate aldolase         | <b>0.56</b>  | 0.34574 |
| STM2142    | yegT       | putative transport protein             | <b>-0.25</b> | 0.56810 |
| STM2142    | yegT       | putative transport protein             | <b>-0.34</b> | 0.40562 |
| STM2143    | yegU       | putative glycohydrolase                | <b>-0.04</b> | 0.95081 |
| STM2143    | yegU       | putative glycohydrolase                | <b>0.10</b>  | 0.83855 |
| STM2144    | yegV       | putative sugar kinase                  | <b>0.04</b>  | 0.96018 |
| STM2144    | yegV       | putative sugar kinase                  | <b>-0.06</b> | 0.88012 |
| STM2145    | yegW       | putative regulatory protein            | <b>-0.09</b> | 0.92840 |
| STM2145    | yegW       | putative regulatory protein            | <b>-0.23</b> | 0.59978 |
| STM2146    | thiD       | phosphomethylpyrimidine kinase         | <b>-0.36</b> | 0.38552 |
| STM2146    | thiD       | phosphomethylpyrimidine kinase         | <b>0.46</b>  | 0.33095 |
| STM2147    | thiM       | hydroxyethylthiazole kinase            | <b>0.01</b>  | 0.97983 |
| STM2147    | thiM       | hydroxyethylthiazole kinase            | <b>0.44</b>  | 0.49009 |
| STM2148    | STM2148    | putative periplasmic protein           | <b>-0.49</b> | 0.27045 |
| STM2148    | STM2148    | putative periplasmic protein           | <b>0.52</b>  | 0.22602 |
| STM2149    | stcD       | putative outer membrane lipoprotein    | <b>-0.58</b> | 0.41144 |
| STM2149    | stcD       | putative outer membrane lipoprotein    | <b>-0.09</b> | 0.88548 |
| STM2150    | stcC       | putative outer membrane protein        | <b>-0.37</b> | 0.46436 |
| STM2150    | stcC       | putative outer membrane protein        | <b>0.07</b>  | 0.91047 |
| STM2151    | stcB       | putative periplasmic chaperone protein | <b>-0.90</b> | 0.19398 |
| STM2151    | stcB       | putative periplasmic chaperone protein | <b>0.22</b>  | 0.71902 |
| STM2152    | stcA       | putative fimbrial-like protein         | <b>-0.35</b> | 0.65451 |
| STM2152    | stcA       | putative fimbrial-like protein         | <b>0.09</b>  | 0.88561 |
| STM2153    | yehE       | putative outer membrane protein        | <b>-0.06</b> | 0.91047 |
| STM2153    | yehE       | putative outer membrane protein        | <b>-0.03</b> | 0.95663 |
| STM2154    | mrp        | putative ATP-binding protein           | <b>-0.09</b> | 0.83855 |
| STM2154    | mrp        | putative ATP-binding protein           | <b>0.22</b>  | 0.65012 |
| STM2155    | metG       | methionyl-tRNA synthetase              | <b>-0.17</b> | 0.73207 |
| STM2155    | metG       | methionyl-tRNA synthetase              | <b>-0.23</b> | 0.61833 |
| STM2156    | yehR       | putative lipoprotein                   | <b>-0.42</b> | 0.43365 |
| STM2156    | yehR       | putative lipoprotein                   | <b>0.12</b>  | 0.85718 |
| STM2156A   | STM2156A   | hypothetical protein STM2156A          | <b>-0.44</b> | 0.31989 |
| STM2156A   | STM2156A   | hypothetical protein STM2156A          | <b>0.10</b>  | 0.83655 |
| STM2157    | yehS       | putative cytoplasmic protein           | <b>0.28</b>  | 0.42957 |
| STM2157    | yehS       | putative cytoplasmic protein           | <b>0.43</b>  | 0.32760 |
| STM2158    | yehT       | putative regulatory protein            | <b>-0.12</b> | 0.81455 |
| STM2158    | yehT       | putative regulatory protein            | <b>0.45</b>  | 0.31236 |
| STM2159    | yehU       | putative sensor kinase                 | <b>-0.27</b> | 0.63793 |
| STM2159    | yehU       | putative sensor kinase                 | <b>0.41</b>  | 0.37920 |
| STM2160    | yehV       | putative transcriptional repressor     | <b>-0.24</b> | 0.60950 |
| STM2160    | yehV       | putative transcriptional repressor     | <b>0.22</b>  | 0.60444 |

|         |         |                                                                     |              |         |
|---------|---------|---------------------------------------------------------------------|--------------|---------|
| STM2162 | yehW    | putative ABC-type proline/glycine betaine transport system permease | <b>-0.07</b> | 0.87917 |
| STM2162 | yehW    | putative ABC-type proline/glycine betaine transport system permease | <b>-0.11</b> | 0.79134 |
| STM2163 | yehX    | putative ABC-type proline/glycine betaine transport system ATPase   | <b>-0.31</b> | 0.64267 |
| STM2163 | yehX    | putative ABC-type proline/glycine betaine transport system ATPase   | <b>-0.26</b> | 0.66990 |
| STM2164 | yehY    | putative ABC-type proline/glycine betaine transport system permease | <b>-0.37</b> | 0.34553 |
| STM2164 | yehY    | putative ABC-type proline/glycine betaine transport system permease | <b>0.24</b>  | 0.69624 |
| STM2165 | yehZ    | putative transport protein                                          | <b>-0.65</b> | 0.16631 |
| STM2165 | yehZ    | putative transport protein                                          | <b>0.24</b>  | 0.59543 |
| STM2166 | bglX    | periplasmic beta-D-glucoside glucohydrolase                         | <b>-0.11</b> | 0.83188 |
| STM2166 | bglX    | periplasmic beta-D-glucoside glucohydrolase                         | <b>0.36</b>  | 0.35363 |
| STM2167 | dld     | D-lactate dehydrogenase                                             | <b>-0.86</b> | 0.11671 |
| STM2167 | dld     | D-lactate dehydrogenase                                             | <b>-0.21</b> | 0.68136 |
| STM2168 | pbpG    | D-alanyl-D-alanine endopeptidase                                    | <b>-0.23</b> | 0.65974 |
| STM2168 | pbpG    | D-alanyl-D-alanine endopeptidase                                    | <b>-0.32</b> | 0.55956 |
| STM2169 | yohC    | putative transport protein                                          | <b>-0.23</b> | 0.52897 |
| STM2169 | yohC    | putative transport protein                                          | <b>-0.09</b> | 0.86560 |
| STM2170 | yohD    | hypothetical protein STM2170                                        | <b>-0.14</b> | 0.71297 |
| STM2170 | yohD    | hypothetical protein STM2170                                        | <b>0.76</b>  | 0.18426 |
| STM2171 | yohF    | oxidoreductase                                                      | <b>0.13</b>  | 0.89058 |
| STM2171 | yohF    | oxidoreductase                                                      | <b>0.51</b>  | 0.35325 |
| STM2172 | yohG    | putative outer membrane efflux protein                              | <b>0.32</b>  | 0.39791 |
| STM2172 | yohG    | putative outer membrane efflux protein                              | <b>0.67</b>  | 0.37182 |
| STM2174 | yohl    | putative regulatory protein                                         | <b>0.06</b>  | 0.91359 |
| STM2174 | yohl    | putative regulatory protein                                         | <b>0.59</b>  | 0.24520 |
| STM2175 | STM2175 | salicylate hydroxylase                                              | <b>-0.46</b> | 0.53453 |
| STM2175 | STM2175 | salicylate hydroxylase                                              | <b>0.46</b>  | 0.49633 |
| STM2176 | STM2176 | putative glutathione S-transferase                                  | <b>-0.33</b> | 0.56162 |
| STM2176 | STM2176 | putative glutathione S-transferase                                  | <b>-0.09</b> | 0.89578 |
| STM2177 | STM2177 | putative glutathione S-transferase                                  | <b>-0.44</b> | 0.34148 |
| STM2177 | STM2177 | putative glutathione S-transferase                                  | <b>0.42</b>  | 0.35816 |
| STM2178 | STM2178 | putative 1,2-dioxygenase                                            | <b>0.26</b>  | 0.61201 |
| STM2178 | STM2178 | putative 1,2-dioxygenase                                            | <b>0.67</b>  | 0.20168 |
| STM2179 | STM2179 | putative sugar transporter                                          | <b>0.09</b>  | 0.85149 |
| STM2179 | STM2179 | putative sugar transporter                                          | <b>0.65</b>  | 0.23772 |
| STM2180 | STM2180 | putative transcriptional regulator                                  | <b>0.01</b>  | 0.98718 |
| STM2180 | STM2180 | putative transcriptional regulator                                  | <b>0.12</b>  | 0.80070 |
| STM2181 | yohJ    | hypothetical protein STM2181                                        | <b>-0.58</b> | 0.26261 |
| STM2181 | yohJ    | hypothetical protein STM2181                                        | <b>-0.32</b> | 0.57950 |
| STM2182 | yohK    | hypothetical protein STM2182                                        | <b>0.03</b>  | 0.96018 |
| STM2182 | yohK    | hypothetical protein STM2182                                        | <b>0.33</b>  | 0.41314 |
| STM2183 | cdd     | cytidine deaminase                                                  | <b>0.09</b>  | 0.87154 |
| STM2183 | cdd     | cytidine deaminase                                                  | <b>0.99</b>  | 0.09224 |
| STM2184 | sanA    | vancomycin sensitivity                                              | <b>-0.04</b> | 0.93485 |
| STM2184 | sanA    | vancomycin sensitivity                                              | <b>0.23</b>  | 0.60679 |
| STM2185 | b2145   | putative inner membrane protein                                     | <b>-0.06</b> | 0.91170 |
| STM2185 | b2145   | putative inner membrane protein                                     | <b>0.25</b>  | 0.52151 |
| STM2186 | STM2186 | putative NADPH-dependent glutamate synthase beta chain              | <b>-0.14</b> | 0.82071 |
| STM2186 | STM2186 | putative NADPH-dependent glutamate synthase beta chain              | <b>0.66</b>  | 0.22621 |
| STM2187 | yeiA    | dihydropyrimidine dehydrogenase                                     | <b>-0.39</b> | 0.37610 |
| STM2187 | yeiA    | dihydropyrimidine dehydrogenase                                     | <b>0.26</b>  | 0.67662 |
| STM2188 | mgIC    | beta-methylgalactoside transporter inner membrane component         | <b>-0.27</b> | 0.76811 |
| STM2188 | mgIC    | beta-methylgalactoside transporter inner membrane component         | <b>1.17</b>  | 0.06780 |

|           |         |                                                                  |              |         |
|-----------|---------|------------------------------------------------------------------|--------------|---------|
| STM2189   | mgIA    | methyl-galactoside transport protein                             | <b>0.42</b>  | 0.51252 |
| STM2189   | mgIA    | methyl-galactoside transport protein                             | <b>1.19</b>  | 0.13206 |
| STM2190   | mgIB    | galactose transport protein                                      | <b>0.28</b>  | 0.66641 |
| STM2190   | mgIB    | galactose transport protein                                      | <b>1.21</b>  | 0.10586 |
| STM2191   | galS    | mgl operon transcriptional repressor                             | <b>0.27</b>  | 0.60891 |
| STM2191   | galS    | mgl operon transcriptional repressor                             | <b>0.96</b>  | 0.11690 |
| STM2192   | yeiB    | putative inner membrane protein                                  | <b>-0.12</b> | 0.83223 |
| STM2192   | yeiB    | putative inner membrane protein                                  | <b>0.09</b>  | 0.84854 |
| STM2193   | foIE    | GTP cyclohydrolase I                                             | <b>-0.23</b> | 0.57465 |
| STM2193   | foIE    | GTP cyclohydrolase I                                             | <b>0.02</b>  | 0.97333 |
| STM2194   | yeiG    | putative esterase                                                | <b>-0.14</b> | 0.76381 |
| STM2194   | yeiG    | putative esterase                                                | <b>-0.07</b> | 0.88959 |
| STM2195   | STM2195 | putative transcriptional regulator                               | <b>-0.04</b> | 0.94798 |
| STM2195   | STM2195 | putative transcriptional regulator                               | <b>0.15</b>  | 0.74481 |
| STM2196   | STM2196 | putative L-serine dehydratase                                    | <b>-0.57</b> | 0.28221 |
| STM2196   | STM2196 | putative L-serine dehydratase                                    | <b>0.18</b>  | 0.66310 |
| STM2197   | STM2197 | putative phosphoserine phosphatase                               | <b>-0.64</b> | 0.33452 |
| STM2197   | STM2197 | putative phosphoserine phosphatase                               | <b>0.15</b>  | 0.81667 |
| STM2198   | STM2198 | putative regulatory protein                                      | <b>0.41</b>  | 0.45477 |
| STM2198   | STM2198 | putative regulatory protein                                      | <b>0.62</b>  | 0.30605 |
| STM2199   | cirA    | colicin I receptor protein                                       | <b>-0.41</b> | 0.50529 |
| STM2199   | cirA    | colicin I receptor protein                                       | <b>0.71</b>  | 0.21671 |
| STM2200   | lysP    | lysine-specific permease                                         | <b>-0.04</b> | 0.93506 |
| STM2200   | lysP    | lysine-specific permease                                         | <b>0.12</b>  | 0.86585 |
| STM2201   | yeiE    | putative transcriptional regulator                               | <b>0.19</b>  | 0.65353 |
| STM2201   | yeiE    | putative transcriptional regulator                               | <b>0.11</b>  | 0.82327 |
| STM2202   | yeiH    | putative inner membrane protein                                  | <b>0.05</b>  | 0.92874 |
| STM2202   | yeiH    | putative inner membrane protein                                  | <b>-0.07</b> | 0.88765 |
| STM2203   | nfo     | endonuclease IV                                                  | <b>-0.64</b> | 0.21015 |
| STM2203   | nfo     | endonuclease IV                                                  | <b>-0.08</b> | 0.84862 |
| STM2204   | fruA    | fructose-specific transport protein                              | <b>-0.09</b> | 0.88561 |
| STM2204   | fruA    | fructose-specific transport protein                              | <b>0.24</b>  | 0.69882 |
| STM2205   | fruK    | 1-phosphofructokinase                                            | <b>-0.36</b> | 0.40633 |
| STM2205   | fruK    | 1-phosphofructokinase                                            | <b>0.07</b>  | 0.91900 |
| STM2206   | fruF    | phosphoenolpyruvate-dependent sugar phosphotransferase system    | <b>-0.17</b> | 0.76631 |
| STM2206   | fruF    | phosphoenolpyruvate-dependent sugar phosphotransferase system    | <b>-0.09</b> | 0.87146 |
| STM2207   | setB    | proton efflux pump                                               | <b>-0.49</b> | 0.22644 |
| STM2207   | setB    | proton efflux pump                                               | <b>-0.09</b> | 0.81862 |
| STM2208   | STM2208 | putative inner membrane protein                                  | <b>-0.50</b> | 0.33536 |
| STM2208   | STM2208 | putative inner membrane protein                                  | <b>0.20</b>  | 0.79176 |
| STM2209   | STM2209 | putative inner membrane protein                                  | <b>0.08</b>  | 0.85766 |
| STM2209   | STM2209 | putative inner membrane protein                                  | <b>-0.10</b> | 0.86958 |
| STM2211,S | yeiP    | elongation factor P                                              | <b>-0.16</b> | 0.68583 |
| STM2211,S | yeiP    | elongation factor P                                              | <b>0.53</b>  | 0.21501 |
| STM2212   | yeiR    | putative cobalamin biosynthetic protein                          | <b>-0.85</b> | 0.11224 |
| STM2212   | yeiR    | putative cobalamin biosynthetic protein                          | <b>-0.04</b> | 0.95721 |
| STM2213   | yeiU    | putative permease                                                | <b>-0.99</b> | 0.08783 |
| STM2213   | yeiU    | putative permease                                                | <b>-0.96</b> | 0.13206 |
| STM2214   | spr     | putative lipoprotein                                             | <b>-0.02</b> | 0.96785 |
| STM2214   | spr     | putative lipoprotein                                             | <b>-0.05</b> | 0.92637 |
| STM2215   | rtn     | hypothetical protein STM2215                                     | <b>-0.17</b> | 0.77923 |
| STM2215   | rtn     | hypothetical protein STM2215                                     | <b>0.02</b>  | 0.97449 |
| STM2216   | yejA    | putative ABC transporter periplasmic binding protein             | <b>-0.16</b> | 0.73157 |
| STM2216   | yejA    | putative ABC transporter periplasmic binding protein             | <b>0.38</b>  | 0.34272 |
| STM2217   | yejB    | putative ABC-type dipeptide/oligopeptide/nickel transport system | <b>-0.16</b> | 0.75424 |
| STM2217   | yejB    | putative ABC-type dipeptide/oligopeptide/nickel transport system | <b>0.01</b>  | 0.99213 |
| STM2218   | yejE    | putative ABC-type dipeptide/oligopeptide/nickel transport system | <b>-0.08</b> | 0.89675 |

|         |          |                                                                  |              |         |
|---------|----------|------------------------------------------------------------------|--------------|---------|
| STM2218 | yejE     | putative ABC-type dipeptide/oligopeptide/nickel transport system | <b>0.28</b>  | 0.49035 |
| STM2219 | yejF     | putative ABC-type transport system ATPase component              | <b>-0.11</b> | 0.81323 |
| STM2219 | yejF     | putative ABC-type transport system ATPase component              | <b>0.09</b>  | 0.87975 |
| STM2220 | yejG     | putative cytoplasmic protein                                     | <b>-0.40</b> | 0.26465 |
| STM2220 | yejG     | putative cytoplasmic protein                                     | <b>0.00</b>  | 0.99751 |
| STM2221 | bcr      | bicyclomycin resistance protein                                  | <b>-0.20</b> | 0.58595 |
| STM2221 | bcr      | bicyclomycin resistance protein                                  | <b>-0.20</b> | 0.63477 |
| STM2222 | rsuA     | 16S rRNA pseudouridylate 516 synthase                            | <b>-0.47</b> | 0.32967 |
| STM2222 | rsuA     | 16S rRNA pseudouridylate 516 synthase                            | <b>-0.40</b> | 0.33971 |
| STM2223 | yejH     | putative ATP-dependent helicase                                  | <b>-0.36</b> | 0.39302 |
| STM2223 | yejH     | putative ATP-dependent helicase                                  | <b>-0.11</b> | 0.87456 |
| STM2224 | rplY     | 50S ribosomal protein L25                                        | <b>-0.10</b> | 0.78990 |
| STM2224 | rplY     | 50S ribosomal protein L25                                        | <b>0.42</b>  | 0.36311 |
| STM2225 | STM2225  | putative inner membrane protein                                  | <b>-0.04</b> | 0.94426 |
| STM2225 | STM2225  | putative inner membrane protein                                  | <b>0.16</b>  | 0.81342 |
| STM2226 | yejK     | nucleoid-associated protein NdpA                                 | <b>-0.08</b> | 0.82443 |
| STM2226 | yejK     | nucleoid-associated protein NdpA                                 | <b>0.78</b>  | 0.11913 |
| STM2227 | yejL     | putative cytoplasmic protein                                     | <b>-0.19</b> | 0.59768 |
| STM2227 | yejL     | putative cytoplasmic protein                                     | <b>-0.01</b> | 0.98793 |
| STM2228 | yejM     | putative hydrolase                                               | <b>0.06</b>  | 0.90797 |
| STM2228 | yejM     | putative hydrolase                                               | <b>-0.27</b> | 0.46854 |
| STM2229 | tRNAPro2 | STM2229                                                          | <b>-0.27</b> | 0.70249 |
| STM2229 | tRNAPro2 | STM2229                                                          | <b>0.51</b>  | 0.33813 |
| STM2231 | STM2231  | virulence protein                                                | <b>0.01</b>  | 0.99268 |
| STM2231 | STM2231  | virulence protein                                                | <b>0.67</b>  | 0.19142 |
| STM2232 | oafA     | O-antigen acetylase                                              | <b>-0.02</b> | 0.97505 |
| STM2232 | oafA     | O-antigen acetylase                                              | <b>0.17</b>  | 0.71973 |
| STM2233 | STM2233  | putative cytoplasmic protein                                     | <b>-0.42</b> | 0.32181 |
| STM2233 | STM2233  | putative cytoplasmic protein                                     | <b>-0.11</b> | 0.84911 |
| STM2234 | STM2234  | putative phage tail fiber assembly protein                       | <b>-0.30</b> | 0.68313 |
| STM2234 | STM2234  | putative phage tail fiber assembly protein                       | <b>-0.16</b> | 0.80840 |
| STM2235 | STM2235  | hypothetical protein STM2235                                     | <b>0.34</b>  | 0.75002 |
| STM2235 | STM2235  | hypothetical protein STM2235                                     | <b>-0.04</b> | 0.93991 |
| STM2236 | STM2236  | hypothetical protein STM2236                                     | <b>-0.39</b> | 0.56253 |
| STM2236 | STM2236  | hypothetical protein STM2236                                     | <b>-0.24</b> | 0.61930 |
| STM2237 | STM2237  | putative inner membrane protein                                  | <b>-0.05</b> | 0.94739 |
| STM2237 | STM2237  | putative inner membrane protein                                  | <b>0.46</b>  | 0.33536 |
| STM2238 | STM2238  | hypothetical protein STM2238                                     | <b>-0.32</b> | 0.56535 |
| STM2238 | STM2238  | hypothetical protein STM2238                                     | <b>-0.13</b> | 0.83855 |
| STM2240 | STM2240  | putative cytoplasmic protein                                     | <b>-0.46</b> | 0.46784 |
| STM2240 | STM2240  | putative cytoplasmic protein                                     | <b>0.02</b>  | 0.97583 |
| STM2240 | STM2240  | putative cytoplasmic protein                                     | <b>0.31</b>  | 0.70355 |
| STM2240 | STM2240  | putative cytoplasmic protein                                     | <b>-0.25</b> | 0.67823 |
| STM2241 | sspH2    | leucine-rich repeat protein                                      | <b>-0.87</b> | 0.11690 |
| STM2241 | sspH2    | leucine-rich repeat protein                                      | <b>-0.21</b> | 0.55842 |
| STM2242 | STM2242  | putative phage tail fiber protein                                | <b>-0.19</b> | 0.76605 |
| STM2242 | STM2242  | putative phage tail fiber protein                                | <b>0.28</b>  | 0.48814 |
| STM2243 | STM2243  | putative tail fiber protein of phage                             | <b>0.03</b>  | 0.96785 |
| STM2243 | STM2243  | putative tail fiber protein of phage                             | <b>0.57</b>  | 0.30497 |
| STM2245 | STM2245  | putative outer membrane protein                                  | <b>-0.12</b> | 0.82431 |
| STM2245 | STM2245  | putative outer membrane protein                                  | <b>0.30</b>  | 0.74714 |
| STM2246 | narP     | response regulator                                               | <b>-0.19</b> | 0.70084 |
| STM2246 | narP     | response regulator                                               | <b>-0.33</b> | 0.52767 |
| STM2247 | ccmH     | putative heme lyase subunit                                      | <b>-0.16</b> | 0.75530 |
| STM2247 | ccmH     | putative heme lyase subunit                                      | <b>1.02</b>  | 0.10012 |
| STM2254 | ccmA     | heme exporter protein                                            | <b>-0.35</b> | 0.52511 |
| STM2254 | ccmA     | heme exporter protein                                            | <b>-0.16</b> | 0.68599 |
| STM2254 | ccmA     | heme exporter protein                                            | <b>0.36</b>  | 0.32126 |
| STM2254 | ccmA     | heme exporter protein                                            | <b>0.37</b>  | 0.40227 |
| STM2255 | napC     | periplasmic nitrate reductase                                    | <b>-0.17</b> | 0.68136 |
| STM2255 | napC     | periplasmic nitrate reductase                                    | <b>0.31</b>  | 0.41552 |
| STM2256 | napB     | periplasmic nitrate reductase                                    | <b>0.20</b>  | 0.64422 |

|         |         |                                                       |              |         |
|---------|---------|-------------------------------------------------------|--------------|---------|
| STM2256 | napB    | periplasmic nitrate reductase                         | <b>0.64</b>  | 0.40562 |
| STM2257 | napH    | quinol dehydrogenase membrane component               | <b>-0.39</b> | 0.36465 |
| STM2257 | napH    | quinol dehydrogenase membrane component               | <b>-0.02</b> | 0.96650 |
| STM2258 | napG    | quinol dehydrogenase periplasmic component            | <b>0.01</b>  | 0.99009 |
| STM2258 | napG    | quinol dehydrogenase periplasmic component            | <b>0.16</b>  | 0.79893 |
| STM2259 | napA    | periplasmic nitrate reductase                         | <b>-0.11</b> | 0.78755 |
| STM2259 | napA    | periplasmic nitrate reductase                         | <b>0.71</b>  | 0.14030 |
| STM2260 | napD    | periplasmic nitrate reductase                         | <b>-0.35</b> | 0.61654 |
| STM2260 | napD    | periplasmic nitrate reductase                         | <b>0.16</b>  | 0.76172 |
| STM2262 | eco     | ecotin precursor                                      | <b>-0.24</b> | 0.57559 |
| STM2262 | eco     | ecotin precursor                                      | <b>0.77</b>  | 0.13206 |
|         |         | putative ABC-type multidrug/protein/lipid transport   |              |         |
| STM2263 | yojI    | system ATPase                                         | <b>0.18</b>  | 0.79223 |
|         |         | putative ABC-type multidrug/protein/lipid transport   |              |         |
| STM2263 | yojI    | system ATPase                                         | <b>0.40</b>  | 0.39136 |
| STM2264 | alkB    | DNA repair system protein                             | <b>-0.10</b> | 0.80652 |
| STM2264 | alkB    | DNA repair system protein                             | <b>-0.11</b> | 0.80833 |
| STM2265 | ada     | O6-methylguanine-DNA methyltransferase/transcription  | <b>-0.48</b> | 0.22540 |
| STM2265 | ada     | O6-methylguanine-DNA methyltransferase/transcription  | <b>-0.19</b> | 0.67804 |
| STM2266 | apbE    | putative lipoprotein                                  | <b>-0.71</b> | 0.16281 |
| STM2266 | apbE    | putative lipoprotein                                  | <b>-0.33</b> | 0.46199 |
| STM2267 | ompC    | outer membrane protein C precursor                    | <b>-0.73</b> | 0.34051 |
| STM2267 | ompC    | outer membrane protein C precursor                    | <b>-0.79</b> | 0.19843 |
| STM2269 | yojN    | putative sensor kinase                                | <b>-0.19</b> | 0.67330 |
| STM2269 | yojN    | putative sensor kinase                                | <b>0.40</b>  | 0.31384 |
| STM2270 | rcsB    | response regulator                                    | <b>-0.27</b> | 0.61636 |
| STM2270 | rcsB    | response regulator                                    | <b>-0.04</b> | 0.95397 |
| STM2271 | rcsC    | sensory histidine kinase                              | <b>-0.41</b> | 0.28598 |
| STM2271 | rcsC    | sensory histidine kinase                              | <b>0.37</b>  | 0.29543 |
| STM2272 | gyrA    | DNA gyrase subunit A                                  | <b>-0.38</b> | 0.35955 |
| STM2272 | gyrA    | DNA gyrase subunit A                                  | <b>0.06</b>  | 0.88959 |
| STM2273 | STM2273 | putative dehydratase                                  | <b>0.09</b>  | 0.89736 |
| STM2273 | STM2273 | putative dehydratase                                  | <b>0.28</b>  | 0.54461 |
| STM2274 | STM2274 | putative permease                                     | <b>-0.08</b> | 0.88937 |
| STM2274 | STM2274 | putative permease                                     | <b>-0.08</b> | 0.89863 |
| STM2275 | STM2275 | putative regulatory protein                           | <b>-0.24</b> | 0.51480 |
| STM2275 | STM2275 | putative regulatory protein                           | <b>0.41</b>  | 0.27636 |
| STM2276 | ubiG    | 3-demethylubiquinone-9 3-methyltransferase            | <b>0.62</b>  | 0.17359 |
| STM2276 | ubiG    | 3-demethylubiquinone-9 3-methyltransferase            | <b>0.89</b>  | 0.20285 |
| STM2277 | nrdA    | ribonucleotide-diphosphate reductase alpha subunit    | <b>0.14</b>  | 0.76172 |
| STM2277 | nrdA    | ribonucleotide-diphosphate reductase alpha subunit    | <b>0.30</b>  | 0.38351 |
| STM2278 | nrdB    | ribonucleotide-diphosphate reductase beta subunit     | <b>-0.27</b> | 0.55403 |
| STM2278 | nrdB    | ribonucleotide-diphosphate reductase beta subunit     | <b>0.35</b>  | 0.38748 |
| STM2279 | yfaE    | putative ferredoxin                                   | <b>-0.17</b> | 0.73129 |
| STM2279 | yfaE    | putative ferredoxin                                   | <b>0.04</b>  | 0.92840 |
| STM2280 | STM2280 | putative permease                                     | <b>-0.37</b> | 0.52676 |
| STM2280 | STM2280 | putative permease                                     | <b>-0.17</b> | 0.74528 |
| STM2281 | STM2281 | putative transcriptional regulator                    | <b>0.18</b>  | 0.81667 |
| STM2281 | STM2281 | putative transcriptional regulator                    | <b>0.94</b>  | 0.11224 |
| STM2282 | glpQ    | periplasmic glycerophosphodiester phosphodiesterase   | <b>0.44</b>  | 0.53362 |
| STM2282 | glpQ    | periplasmic glycerophosphodiester phosphodiesterase   | <b>0.42</b>  | 0.47610 |
| STM2283 | glpT    | sn-glycerol-3-phosphate transport protein             | <b>0.75</b>  | 0.33531 |
| STM2283 | glpT    | sn-glycerol-3-phosphate transport protein             | <b>0.92</b>  | 0.21078 |
| STM2284 | glpA    | sn-glycerol-3-phosphate dehydrogenase large subunit   | <b>0.83</b>  | 0.23187 |
| STM2284 | glpA    | sn-glycerol-3-phosphate dehydrogenase large subunit   | <b>0.90</b>  | 0.13813 |
|         |         | anaerobic glycerol-3-phosphate dehydrogenase subunit  |              |         |
| STM2285 | glpB    | B                                                     | <b>0.36</b>  | 0.32675 |
|         |         | anaerobic glycerol-3-phosphate dehydrogenase subunit  |              |         |
| STM2285 | glpB    | B                                                     | <b>0.62</b>  | 0.15859 |
| STM2286 | glpC    | sn-glycerol-3-phosphate dehydrogenase K-small subunit | <b>-0.40</b> | 0.45800 |
| STM2286 | glpC    | sn-glycerol-3-phosphate dehydrogenase K-small subunit | <b>0.41</b>  | 0.67157 |
| STM2287 | STM2287 | putative cytoplasmic protein                          | <b>-0.37</b> | 0.37919 |
| STM2287 | STM2287 | putative cytoplasmic protein                          | <b>0.02</b>  | 0.98539 |

|           |         |                                                                 |              |         |
|-----------|---------|-----------------------------------------------------------------|--------------|---------|
| STM2288   | STM2288 | putative cytoplasmic protein                                    | <b>-0.49</b> | 0.36842 |
| STM2288   | STM2288 | putative cytoplasmic protein                                    | <b>0.31</b>  | 0.62572 |
| STM2289   | STM2289 | putative 2,4-dihydroxyhept-2-ene-1,7-dioic acid aldolase        | <b>-1.02</b> | 0.11224 |
| STM2289   | STM2289 | putative 2,4-dihydroxyhept-2-ene-1,7-dioic acid aldolase        | <b>0.09</b>  | 0.82956 |
| STM2290   | yfaV    | putative transport protein                                      | <b>-0.06</b> | 0.91148 |
| STM2290   | yfaV    | putative transport protein                                      | <b>0.32</b>  | 0.66070 |
| STM2291   | yfaW    | putative galactonate dehydratase                                | <b>0.03</b>  | 0.98140 |
| STM2291   | yfaW    | putative galactonate dehydratase                                | <b>-0.12</b> | 0.80475 |
| STM2292   | yfaX    | putative transcriptional regulator                              | <b>-0.17</b> | 0.76483 |
| STM2292   | yfaX    | putative transcriptional regulator                              | <b>-0.14</b> | 0.85209 |
| STM2293   | STM2293 | competence damage-inducible protein A                           | <b>0.05</b>  | 0.93637 |
| STM2293   | STM2293 | competence damage-inducible protein A                           | <b>0.27</b>  | 0.59325 |
| STM2294   | yfaZ    | putative inner membrane protein                                 | <b>0.47</b>  | 0.22788 |
| STM2294   | yfaZ    | putative inner membrane protein                                 | <b>0.96</b>  | 0.09991 |
| STM2295   | yfaO    | putative NTP pyrophosphohydrolase                               | <b>0.01</b>  | 0.98693 |
| STM2295   | yfaO    | putative NTP pyrophosphohydrolase                               | <b>-0.09</b> | 0.85457 |
| STM2296   | ais     | aluminum-inducible protein                                      | <b>-0.64</b> | 0.18265 |
| STM2296   | ais     | aluminum-inducible protein                                      | <b>-0.60</b> | 0.20916 |
| STM2297   | yfbE    | 4-amino-4-deoxy-L-arabinose lipopolysaccharide-modifying enzyme | <b>-2.45</b> | 0.00231 |
| STM2297   | yfbE    | 4-amino-4-deoxy-L-arabinose lipopolysaccharide-modifying enzyme | <b>-1.90</b> | 0.00655 |
| STM2298   | pmrF    | putative glycosyl transferase                                   | <b>-1.25</b> | 0.11690 |
| STM2298   | pmrF    | putative glycosyl transferase                                   | <b>-0.72</b> | 0.24444 |
| STM2299   | yfbG    | hypothetical protein STM2299                                    | <b>-1.30</b> | 0.04232 |
| STM2299   | yfbG    | hypothetical protein STM2299                                    | <b>-1.04</b> | 0.06967 |
| STM2300   | STM2300 | putative cytoplasmic protein                                    | <b>-0.82</b> | 0.17940 |
| STM2300   | STM2300 | putative cytoplasmic protein                                    | <b>-0.13</b> | 0.88914 |
| STM2301   | pqaB    | putative melittin resistance protein                            | <b>-1.43</b> | 0.08322 |
| STM2301   | pqaB    | putative melittin resistance protein                            | <b>-0.80</b> | 0.36017 |
| STM2302   | STM2302 | putative inner membrane protein                                 | <b>-0.36</b> | 0.39186 |
| STM2302   | STM2302 | putative inner membrane protein                                 | <b>0.54</b>  | 0.25125 |
| STM2303   | STM2303 | hypothetical protein STM2303                                    | <b>-0.85</b> | 0.11690 |
| STM2303   | STM2303 | hypothetical protein STM2303                                    | <b>-0.42</b> | 0.34761 |
| STM2304   | pmrD    | polymyxin resistance protein B                                  | <b>-0.78</b> | 0.34719 |
| STM2304   | pmrD    | polymyxin resistance protein B                                  | <b>-0.83</b> | 0.13128 |
| STM2305   | menE    | O-succinylbenzoic acid--CoA ligase                              | <b>-0.37</b> | 0.46720 |
| STM2305   | menE    | O-succinylbenzoic acid--CoA ligase                              | <b>-0.04</b> | 0.91844 |
| STM2306   | menC    | O-succinylbenzoate synthase                                     | <b>-0.10</b> | 0.88599 |
| STM2306   | menC    | O-succinylbenzoate synthase                                     | <b>0.02</b>  | 0.96568 |
| STM2307   | menB    | naphthoate synthase                                             | <b>-0.63</b> | 0.19811 |
| STM2307   | menB    | naphthoate synthase                                             | <b>0.02</b>  | 0.96785 |
| STM2308   | yfbB    | putative enzyme                                                 | <b>-0.33</b> | 0.45259 |
| STM2308   | yfbB    | putative enzyme                                                 | <b>0.15</b>  | 0.72821 |
| STM2309   | menD    | 2-oxoglutarate decarboxylase                                    | <b>0.76</b>  | 0.18918 |
| STM2309   | menD    | 2-oxoglutarate decarboxylase                                    | <b>0.84</b>  | 0.28861 |
| STM2310   | menF    | menaquinone-specific isochorismate synthase                     | <b>0.03</b>  | 0.96247 |
| STM2310   | menF    | menaquinone-specific isochorismate synthase                     | <b>1.04</b>  | 0.20916 |
| STM2311   | elaB    | putative inner membrane protein                                 | <b>-0.40</b> | 0.35937 |
| STM2311   | elaB    | putative inner membrane protein                                 | <b>-0.05</b> | 0.92815 |
| STM2312   | elaA    | putative acyltransferase                                        | <b>0.10</b>  | 0.84657 |
| STM2312   | elaA    | putative acyltransferase                                        | <b>0.40</b>  | 0.51819 |
| STM2313   | elaC    | ribonuclease Z                                                  | <b>0.06</b>  | 0.90531 |
| STM2313   | elaC    | ribonuclease Z                                                  | <b>0.33</b>  | 0.47844 |
| STM2314   | STM2314 | putative chemotaxis signal transduction protein                 | <b>0.28</b>  | 0.65145 |
| STM2314   | STM2314 | putative chemotaxis signal transduction protein                 | <b>0.46</b>  | 0.25460 |
| STM2315   | yfbK    | hypothetical protein STM2315                                    | <b>-0.06</b> | 0.89108 |
| STM2315   | yfbK    | hypothetical protein STM2315                                    | <b>0.45</b>  | 0.26239 |
| STM2316,S | nuoN    | NADH dehydrogenase subunit N                                    | <b>-0.15</b> | 0.68830 |
| STM2316,S | nuoN    | NADH dehydrogenase subunit N                                    | <b>0.24</b>  | 0.48362 |
| STM2317   | nuoM    | NADH dehydrogenase subunit M                                    | <b>0.23</b>  | 0.58095 |
| STM2317   | nuoM    | NADH dehydrogenase subunit M                                    | <b>0.25</b>  | 0.51529 |
| STM2318   | nuoL    | NADH dehydrogenase subunit L                                    | <b>0.11</b>  | 0.87019 |

|           |         |                                                          |              |         |
|-----------|---------|----------------------------------------------------------|--------------|---------|
| STM2318   | nuoL    | NADH dehydrogenase subunit L                             | <b>-0.01</b> | 0.98640 |
| STM2319   | nuoK    | NADH dehydrogenase kappa subunit                         | <b>0.19</b>  | 0.57950 |
| STM2319   | nuoK    | NADH dehydrogenase kappa subunit                         | <b>0.02</b>  | 0.96797 |
| STM2320   | nuoJ    | NADH dehydrogenase subunit J                             | <b>-0.06</b> | 0.91203 |
| STM2320   | nuoJ    | NADH dehydrogenase subunit J                             | <b>0.34</b>  | 0.60936 |
| STM2321   | nuoI    | NADH dehydrogenase subunit I                             | <b>-0.25</b> | 0.65451 |
| STM2321   | nuoI    | NADH dehydrogenase subunit I                             | <b>-0.09</b> | 0.85766 |
| STM2322   | nuoH    | NADH dehydrogenase subunit H                             | <b>0.27</b>  | 0.48362 |
| STM2322   | nuoH    | NADH dehydrogenase subunit H                             | <b>0.40</b>  | 0.38080 |
| STM2323,S | nuoG    | NADH dehydrogenase gamma subunit                         | <b>-0.06</b> | 0.90587 |
| STM2323,S | nuoG    | NADH dehydrogenase gamma subunit                         | <b>0.23</b>  | 0.53734 |
| STM2324   | nuoF    | NADH dehydrogenase I chain F                             | <b>0.17</b>  | 0.66893 |
| STM2324   | nuoF    | NADH dehydrogenase I chain F                             | <b>0.22</b>  | 0.61679 |
| STM2325   | nuoE    | ATP synthase subunit E                                   | <b>-0.04</b> | 0.95396 |
| STM2325   | nuoE    | ATP synthase subunit E                                   | <b>-0.02</b> | 0.98090 |
| STM2326   | nuoC    | NADH dehydrogenase I chain C/D                           | <b>0.40</b>  | 0.36856 |
| STM2326   | nuoC    | NADH dehydrogenase I chain C/D                           | <b>0.32</b>  | 0.45069 |
| STM2327   | nuoB    | NADH dehydrogenase beta subunit                          | <b>0.40</b>  | 0.52511 |
| STM2327   | nuoB    | NADH dehydrogenase beta subunit                          | <b>0.54</b>  | 0.34148 |
| STM2328   | nuoA    | NADH dehydrogenase alpha subunit                         | <b>0.42</b>  | 0.34148 |
| STM2328   | nuoA    | NADH dehydrogenase alpha subunit                         | <b>0.55</b>  | 0.22104 |
| STM2329   | STM2329 | putative cytoplasmic protein                             | <b>0.12</b>  | 0.76319 |
| STM2329   | STM2329 | putative cytoplasmic protein                             | <b>0.18</b>  | 0.74557 |
| STM2330   | lrhA    | NADH dehydrogenase transcriptional repressor             | <b>-0.42</b> | 0.27636 |
| STM2330   | lrhA    | NADH dehydrogenase transcriptional repressor             | <b>-0.48</b> | 0.27312 |
| STM2331   | yfbQ    | aspartate aminotransferase                               | <b>-0.09</b> | 0.84783 |
| STM2331   | yfbQ    | aspartate aminotransferase                               | <b>0.27</b>  | 0.61809 |
| STM2332   | STM2332 | hypothetical protein STM2332                             | <b>-0.59</b> | 0.22421 |
| STM2332   | STM2332 | hypothetical protein STM2332                             | <b>-0.02</b> | 0.97415 |
| STM2333   | yfbS    | putative response regulator                              | <b>-0.50</b> | 0.35151 |
| STM2333   | yfbS    | putative response regulator                              | <b>-0.14</b> | 0.81075 |
| STM2334   | yfbT    | putative phosphatase                                     | <b>-0.04</b> | 0.94964 |
| STM2334   | yfbT    | putative phosphatase                                     | <b>0.50</b>  | 0.21777 |
| STM2335   | yfbU    | hypothetical protein STM2335                             | <b>0.23</b>  | 0.53731 |
| STM2335   | yfbU    | hypothetical protein STM2335                             | <b>0.17</b>  | 0.69126 |
| STM2336   | STM2336 | hypothetical protein STM2336                             | <b>0.02</b>  | 0.97176 |
| STM2336   | STM2336 | hypothetical protein STM2336                             | <b>-0.16</b> | 0.75437 |
| STM2337   | ackA    | acetate/propionate kinase                                | <b>-0.26</b> | 0.60940 |
| STM2337   | ackA    | acetate/propionate kinase                                | <b>-0.08</b> | 0.90499 |
| STM2338   | pta     | phosphate acetyltransferase                              | <b>-0.20</b> | 0.57850 |
| STM2338   | pta     | phosphate acetyltransferase                              | <b>-0.03</b> | 0.95496 |
| STM2339   | yfcC    | putative integral membrane protein                       | <b>0.05</b>  | 0.93924 |
| STM2339   | yfcC    | putative integral membrane protein                       | <b>-0.34</b> | 0.47610 |
| STM2340   | STM2340 | putative transketolase                                   | <b>0.12</b>  | 0.88508 |
| STM2340   | STM2340 | putative transketolase                                   | <b>0.16</b>  | 0.68961 |
| STM2341   | STM2341 | putative transketolase                                   | <b>-0.11</b> | 0.91170 |
| STM2341   | STM2341 | putative transketolase                                   | <b>0.75</b>  | 0.13027 |
| STM2342   | ulaA    | ascorbate-specific PTS system enzyme IIC                 | <b>0.41</b>  | 0.55309 |
| STM2342   | ulaA    | ascorbate-specific PTS system enzyme IIC                 | <b>0.74</b>  | 0.30748 |
| STM2343   | STM2343 | putative cytoplasmic protein                             | <b>0.39</b>  | 0.45861 |
| STM2343   | STM2343 | putative cytoplasmic protein                             | <b>-0.11</b> | 0.93023 |
| STM2344   | STM2344 | putative phosphotransferase system enzyme II A component | <b>0.01</b>  | 0.99009 |
| STM2344   | STM2344 | putative phosphotransferase system enzyme II A component | <b>1.27</b>  | 0.17359 |
| STM2345   | STM2345 | putative transcriptional regulator                       | <b>-0.15</b> | 0.77683 |
| STM2345   | STM2345 | putative transcriptional regulator                       | <b>0.26</b>  | 0.56849 |
| STM2346   | STM2346 | putative NTP pyrophosphohydrolase                        | <b>-0.35</b> | 0.35937 |
| STM2346   | STM2346 | putative NTP pyrophosphohydrolase                        | <b>-0.21</b> | 0.63510 |
| STM2347   | yfcE    | phosphodiesterase                                        | <b>-0.33</b> | 0.66469 |
| STM2347   | yfcE    | phosphodiesterase                                        | <b>1.22</b>  | 0.11913 |
| STM2348   | yfcF    | putative glutathione S-transferase                       | <b>-0.13</b> | 0.81732 |
| STM2348   | yfcF    | putative glutathione S-transferase                       | <b>-0.36</b> | 0.45082 |

|         |         |                                                       |              |         |
|---------|---------|-------------------------------------------------------|--------------|---------|
| STM2349 | yfcG    | putative glutathione S-transferase                    | <b>-0.04</b> | 0.96605 |
| STM2349 | yfcG    | putative glutathione S-transferase                    | <b>0.95</b>  | 0.43982 |
| STM2350 | yfcH    | putative sugar nucleotide epimerase                   | <b>-0.06</b> | 0.93916 |
| STM2350 | yfcH    | putative sugar nucleotide epimerase                   | <b>0.30</b>  | 0.65181 |
| STM2351 | hisP    | histidine/lysine/arginine/ornithine transport protein | <b>0.27</b>  | 0.66747 |
| STM2351 | hisP    | histidine/lysine/arginine/ornithine transport protein | <b>1.31</b>  | 0.29866 |
| STM2352 | hisM    | histidine/lysine/arginine/ornithine transport protein | <b>0.02</b>  | 0.96785 |
| STM2352 | hisM    | histidine/lysine/arginine/ornithine transport protein | <b>0.41</b>  | 0.39186 |
| STM2353 | hisQ    | histidine/lysine/arginine/ornithine transport protein | <b>0.00</b>  | 0.99770 |
| STM2353 | hisQ    | histidine/lysine/arginine/ornithine transport protein | <b>0.58</b>  | 0.36942 |
| STM2354 | hisJ    | histidine transport protein                           | <b>-0.50</b> | 0.21933 |
| STM2354 | hisJ    | histidine transport protein                           | <b>-0.16</b> | 0.71169 |
| STM2355 | argT    | lysine/arginine/ornithine transport protein           | <b>0.15</b>  | 0.77346 |
| STM2355 | argT    | lysine/arginine/ornithine transport protein           | <b>0.53</b>  | 0.33452 |
| STM2356 | ubiX    | 3-octaprenyl-4-hydroxybenzoate carboxy-lyase          | <b>-0.53</b> | 0.38729 |
| STM2356 | ubiX    | 3-octaprenyl-4-hydroxybenzoate carboxy-lyase          | <b>-0.15</b> | 0.80475 |
| STM2357 | STM2357 | putative amino acid transporter                       | <b>0.24</b>  | 0.54497 |
| STM2357 | STM2357 | putative amino acid transporter                       | <b>0.13</b>  | 0.81667 |
| STM2358 | STM2358 | putative cytoplasmic protein                          | <b>0.12</b>  | 0.83240 |
| STM2358 | STM2358 | putative cytoplasmic protein                          | <b>0.39</b>  | 0.33452 |
| STM2359 | STM2359 | putative amino acid transporter                       | <b>-0.61</b> | 0.22540 |
| STM2359 | STM2359 | putative amino acid transporter                       | <b>-0.38</b> | 0.44208 |
| STM2360 | STM2360 | putative diaminopimelate decarboxylase                | <b>-0.34</b> | 0.52934 |
| STM2360 | STM2360 | putative diaminopimelate decarboxylase                | <b>-0.19</b> | 0.76767 |
| STM2361 | STM2361 | putative regulatory protein                           | <b>0.11</b>  | 0.84503 |
| STM2361 | STM2361 | putative regulatory protein                           | <b>-0.40</b> | 0.47159 |
| STM2362 | purF    | amidophosphoribosyltransferase                        | <b>-0.25</b> | 0.61960 |
| STM2362 | purF    | amidophosphoribosyltransferase                        | <b>-0.08</b> | 0.86682 |
| STM2363 | cvpA    | colicin V production protein                          | <b>0.20</b>  | 0.55338 |
| STM2363 | cvpA    | colicin V production protein                          | <b>0.09</b>  | 0.82428 |
| STM2364 | dedD    | putative lipoprotein                                  | <b>0.04</b>  | 0.93280 |
| STM2364 | dedD    | putative lipoprotein                                  | <b>-0.16</b> | 0.69882 |
| STM2365 | folC    | multifunctional folylpolyglutamate synthase           | <b>-0.15</b> | 0.76161 |
| STM2365 | folC    | multifunctional folylpolyglutamate synthase           | <b>0.06</b>  | 0.92371 |
| STM2366 | accD    | acetyl-CoA carboxylase beta subunit                   | <b>-0.28</b> | 0.56162 |
| STM2366 | accD    | acetyl-CoA carboxylase beta subunit                   | <b>-0.46</b> | 0.47937 |
| STM2367 | dedA    | hypothetical protein STM2367                          | <b>-0.10</b> | 0.81667 |
| STM2367 | dedA    | hypothetical protein STM2367                          | <b>-0.02</b> | 0.97415 |
| STM2368 | truA    | tRNA pseudouridine synthase A                         | <b>0.06</b>  | 0.90181 |
| STM2368 | truA    | tRNA pseudouridine synthase A                         | <b>-0.07</b> | 0.90430 |
| STM2369 | usg     | hypothetical protein STM2369                          | <b>-0.14</b> | 0.84783 |
| STM2369 | usg     | hypothetical protein STM2369                          | <b>-0.26</b> | 0.53459 |
| STM2370 | pdxB    | erythronate-4-phosphate dehydrogenase                 | <b>-0.13</b> | 0.74142 |
| STM2370 | pdxB    | erythronate-4-phosphate dehydrogenase                 | <b>-0.28</b> | 0.47929 |
| STM2371 | flk     | flagellar protein                                     | <b>0.00</b>  | 0.99887 |
| STM2371 | flk     | flagellar protein                                     | <b>-0.11</b> | 0.84021 |
| STM2372 | STM2372 | hypothetical protein STM2372                          | <b>-0.10</b> | 0.82756 |
| STM2372 | STM2372 | hypothetical protein STM2372                          | <b>0.41</b>  | 0.31989 |
| STM2373 | STM2373 | putative cytoplasmic protein                          | <b>-0.21</b> | 0.74361 |
| STM2373 | STM2373 | putative cytoplasmic protein                          | <b>0.12</b>  | 0.81901 |
| STM2374 | STM2374 | putative regulatory protein                           | <b>0.05</b>  | 0.95384 |
| STM2374 | STM2374 | putative regulatory protein                           | <b>-0.02</b> | 0.97720 |
| STM2375 | STM2375 | putative cytoplasmic protein                          | <b>-0.21</b> | 0.66561 |
| STM2375 | STM2375 | putative cytoplasmic protein                          | <b>-0.15</b> | 0.79666 |
| STM2376 | STM2376 | putative periplasmic protein                          | <b>-0.25</b> | 0.57659 |
| STM2376 | STM2376 | putative periplasmic protein                          | <b>-0.02</b> | 0.97660 |
| STM2377 | STM2377 | putative inner membrane protein                       | <b>-0.09</b> | 0.85679 |
| STM2377 | STM2377 | putative inner membrane protein                       | <b>0.01</b>  | 0.98539 |
| STM2378 | fabB    | 3-oxoacyl-(acyl carrier protein) synthase             | <b>-0.17</b> | 0.70966 |
| STM2378 | fabB    | 3-oxoacyl-(acyl carrier protein) synthase             | <b>-0.23</b> | 0.56860 |
| STM2379 | STM2379 | hypothetical protein STM2379                          | <b>-0.33</b> | 0.54510 |
| STM2379 | STM2379 | hypothetical protein STM2379                          | <b>-0.04</b> | 0.96785 |
| STM2380 | yfcL    | putative cytoplasmic protein                          | <b>0.15</b>  | 0.76008 |

|         |         |                                                         |              |         |
|---------|---------|---------------------------------------------------------|--------------|---------|
| STM2380 | yfcL    | putative cytoplasmic protein                            | <b>0.24</b>  | 0.60051 |
| STM2381 | yfcM    | putative cytoplasmic protein                            | <b>-0.65</b> | 0.16281 |
| STM2381 | yfcM    | putative cytoplasmic protein                            | <b>0.24</b>  | 0.49299 |
| STM2382 | yfcA    | putative permease                                       | <b>0.27</b>  | 0.50255 |
| STM2382 | yfcA    | putative permease                                       | <b>0.75</b>  | 0.12727 |
| STM2383 | mepA    | penicillin-insensitive murein endopeptidase             | <b>-0.59</b> | 0.31422 |
| STM2383 | mepA    | penicillin-insensitive murein endopeptidase             | <b>-0.46</b> | 0.26833 |
| STM2384 | aroC    | chorismate synthase                                     | <b>-0.14</b> | 0.81667 |
| STM2384 | aroC    | chorismate synthase                                     | <b>-0.05</b> | 0.93767 |
| STM2385 | yfcB    | putative methylase                                      | <b>0.00</b>  | 0.99447 |
| STM2385 | yfcB    | putative methylase                                      | <b>-0.12</b> | 0.79102 |
| STM2386 | yfcN    | hypothetical protein STM2386                            | <b>-0.54</b> | 0.24444 |
| STM2386 | yfcN    | hypothetical protein STM2386                            | <b>-0.32</b> | 0.38985 |
| STM2387 | sixA    | phosphohistidine phosphatase                            | <b>-0.49</b> | 0.22283 |
| STM2387 | sixA    | phosphohistidine phosphatase                            | <b>-0.12</b> | 0.78312 |
| STM2388 | yfcX    | putative dehydrogenase                                  | <b>-0.02</b> | 0.96794 |
| STM2388 | yfcX    | putative dehydrogenase                                  | <b>0.61</b>  | 0.29064 |
| STM2389 | yfcY    | acetyl-CoA acetyltransferase                            | <b>-0.33</b> | 0.80559 |
| STM2389 | yfcY    | acetyl-CoA acetyltransferase                            | <b>0.38</b>  | 0.79308 |
| STM2390 | yfcZ    | putative cytoplasmic protein                            | <b>0.17</b>  | 0.72146 |
| STM2390 | yfcZ    | putative cytoplasmic protein                            | <b>0.24</b>  | 0.59760 |
| STM2391 | fadL    | outer membrane-bound fatty acid transporter             | <b>-0.05</b> | 0.92371 |
| STM2391 | fadL    | outer membrane-bound fatty acid transporter             | <b>0.22</b>  | 0.52101 |
| STM2392 | vacJ    | lipoprotein precursor                                   | <b>-0.06</b> | 0.90181 |
| STM2392 | vacJ    | lipoprotein precursor                                   | <b>0.76</b>  | 0.12009 |
| STM2393 | yfdC    | hypothetical protein STM2393                            | <b>0.30</b>  | 0.88018 |
| STM2393 | yfdC    | hypothetical protein STM2393                            | <b>0.80</b>  | 0.55584 |
| STM2394 | argW    | STM2394                                                 | <b>0.00</b>  | 0.99546 |
| STM2394 | argW    | STM2394                                                 | <b>-0.01</b> | 0.99009 |
| STM2395 | pgtE    | outer membrane protein E precursor                      | <b>0.09</b>  | 0.84584 |
| STM2395 | pgtE    | outer membrane protein E precursor                      | <b>0.16</b>  | 0.83268 |
| STM2396 | pgtA    | activator                                               | <b>-0.09</b> | 0.87079 |
| STM2396 | pgtA    | activator                                               | <b>0.46</b>  | 0.39315 |
| STM2397 | pgtB    | phosphoglycerate transport system sensor protein        | <b>-0.34</b> | 0.58108 |
| STM2397 | pgtB    | phosphoglycerate transport system sensor protein        | <b>-0.02</b> | 0.98555 |
| STM2398 | pgtC    | phosphoglycerate transport regulatory protein precursor | <b>-0.59</b> | 0.41715 |
| STM2398 | pgtC    | phosphoglycerate transport regulatory protein precursor | <b>0.61</b>  | 0.36311 |
| STM2399 | pgtP    | transporter                                             | <b>0.18</b>  | 0.70199 |
| STM2399 | pgtP    | transporter                                             | <b>0.50</b>  | 0.49708 |
| STM2400 | STM2400 | putative inner membrane protein                         | <b>-0.15</b> | 0.72781 |
| STM2400 | STM2400 | putative inner membrane protein                         | <b>0.18</b>  | 0.69914 |
| STM2401 | ddg     | lipid A biosynthesis lauroyl acyltransferase            | <b>-0.16</b> | 0.80110 |
| STM2401 | ddg     | lipid A biosynthesis lauroyl acyltransferase            | <b>-0.10</b> | 0.85922 |
| STM2402 | yfdZ    | hypothetical protein STM2402                            | <b>0.06</b>  | 0.90797 |
| STM2402 | yfdZ    | hypothetical protein STM2402                            | <b>0.37</b>  | 0.55956 |
| STM2403 | glk     | glucokinase                                             | <b>-0.07</b> | 0.89640 |
| STM2403 | glk     | glucokinase                                             | <b>-0.01</b> | 0.98539 |
| STM2404 | STM2404 | hypothetical protein STM2404                            | <b>-0.04</b> | 0.94765 |
| STM2404 | STM2404 | hypothetical protein STM2404                            | <b>-0.07</b> | 0.89811 |
| STM2405 | STM2405 | indolepyruvate decarboxylase                            | <b>-0.97</b> | 0.14928 |
| STM2405 | STM2405 | indolepyruvate decarboxylase                            | <b>-0.02</b> | 0.96640 |
| STM2406 | STM2406 | putative oxidoreductase                                 | <b>-0.10</b> | 0.87667 |
| STM2406 | STM2406 | putative oxidoreductase                                 | <b>0.04</b>  | 0.92637 |
| STM2407 | ypeC    | putative periplasmic protein                            | <b>0.56</b>  | 0.35424 |
| STM2407 | ypeC    | putative periplasmic protein                            | <b>1.01</b>  | 0.25460 |
| STM2408 | mntH    | putative manganese transport protein MntH               | <b>-0.56</b> | 0.32164 |
| STM2408 | mntH    | putative manganese transport protein MntH               | <b>0.05</b>  | 0.93841 |
| STM2409 | nupC    | nucleoside transport                                    | <b>0.26</b>  | 0.51538 |
| STM2409 | nupC    | nucleoside transport                                    | <b>0.54</b>  | 0.25565 |
| STM2410 | yfeA    | hypothetical protein STM2410                            | <b>-0.17</b> | 0.77605 |
| STM2410 | yfeA    | hypothetical protein STM2410                            | <b>0.28</b>  | 0.58108 |
| STM2412 | alaW    | STM2412                                                 | <b>-0.38</b> | 0.41541 |
| STM2412 | alaW    | STM2412                                                 | <b>-0.45</b> | 0.24444 |

|            |            |                                                   |              |         |
|------------|------------|---------------------------------------------------|--------------|---------|
| STM2412    | alaW       | STM2412                                           | <b>-0.32</b> | 0.49319 |
| STM2412    | alaW       | STM2412                                           | <b>0.02</b>  | 0.97449 |
| STM2413    | yfeC       | putative negative regulator                       | <b>-0.16</b> | 0.71404 |
| STM2413    | yfeC       | putative negative regulator                       | <b>0.13</b>  | 0.76319 |
| STM2414    | yfeD       | putative negative regulator                       | <b>-0.04</b> | 0.93506 |
| STM2414    | yfeD       | putative negative regulator                       | <b>0.12</b>  | 0.82637 |
| STM2415    | gltX       | glutamyl-tRNA synthetase                          | <b>0.03</b>  | 0.95589 |
| STM2415    | gltX       | glutamyl-tRNA synthetase                          | <b>0.02</b>  | 0.97874 |
| STM2418    | valY       | STM2418                                           | <b>-0.33</b> | 0.37150 |
| STM2418    | valY       | STM2418                                           | <b>-0.61</b> | 0.36270 |
| STM2418    | valY       | STM2418                                           | <b>-0.10</b> | 0.85893 |
| STM2418    | valY       | STM2418                                           | <b>-0.53</b> | 0.42312 |
| STM2418    | valY       | STM2418                                           | <b>-0.37</b> | 0.49374 |
| STM2418    | valY       | STM2418                                           | <b>-0.20</b> | 0.77432 |
| STM2418    | valY       | STM2418                                           | <b>-0.31</b> | 0.57659 |
| STM2418    | valY       | STM2418                                           | <b>-0.20</b> | 0.70199 |
| STM2419    | lysV       | STM2419                                           | <b>-0.23</b> | 0.64330 |
| STM2419    | lysV       | STM2419                                           | <b>-0.36</b> | 0.52208 |
| STM2419    | lysV       | STM2419                                           | <b>-0.64</b> | 0.30422 |
| STM2419    | lysV       | STM2419                                           | <b>-0.06</b> | 0.91484 |
| STM2419    | lysV       | STM2419                                           | <b>-0.37</b> | 0.47455 |
| STM2419    | lysV       | STM2419                                           | <b>-0.30</b> | 0.51267 |
| STM2419    | lysV       | STM2419                                           | <b>-0.23</b> | 0.57089 |
| STM2419    | lysV       | STM2419                                           | <b>-0.29</b> | 0.52151 |
| STM2419    | lysV       | STM2419                                           | <b>-0.34</b> | 0.36243 |
| STM2419    | lysV       | STM2419                                           | <b>-0.37</b> | 0.30113 |
| STM2420    | xapR       | XapA transcriptional regulator                    | <b>-0.38</b> | 0.32763 |
| STM2420    | xapR       | XapA transcriptional regulator                    | <b>-0.23</b> | 0.63815 |
| STM2420,1n | STM2420,1n | hypothetical protein STM2420,1n                   | <b>0.30</b>  | 0.61205 |
| STM2420,1n | STM2420,1n | hypothetical protein STM2420,1n                   | <b>0.04</b>  | 0.94299 |
| STM2421    | xapB       | xanthosine permease                               | <b>-0.24</b> | 0.51604 |
| STM2421    | xapB       | xanthosine permease                               | <b>-0.01</b> | 0.98553 |
| STM2423    | yfeN       | putative outer membrane protein                   | <b>-0.16</b> | 0.74127 |
| STM2423    | yfeN       | putative outer membrane protein                   | <b>-0.44</b> | 0.47174 |
| STM2424    | yfeR       | putative transcriptional regulator                | <b>-0.05</b> | 0.92253 |
| STM2424    | yfeR       | putative transcriptional regulator                | <b>0.88</b>  | 0.13002 |
| STM2425    | yfeH       | putative Na <sup>+</sup> -dependent transporter   | <b>-0.47</b> | 0.40307 |
| STM2425    | yfeH       | putative Na <sup>+</sup> -dependent transporter   | <b>-0.14</b> | 0.81697 |
| STM2426    | STM2426    | putative cytoplasmic protein                      | <b>-0.14</b> | 0.75424 |
| STM2426    | STM2426    | putative cytoplasmic protein                      | <b>0.24</b>  | 0.54624 |
| STM2427    | lig        | DNA ligase                                        | <b>-0.69</b> | 0.16534 |
| STM2427    | lig        | DNA ligase                                        | <b>0.08</b>  | 0.86703 |
| STM2428    | zipA       | cell division protein ZipA                        | <b>-0.19</b> | 0.61299 |
| STM2428    | zipA       | cell division protein ZipA                        | <b>0.16</b>  | 0.70082 |
| STM2429    | cysZ       | putative sulfate transport protein CysZ           | <b>-0.24</b> | 0.60051 |
| STM2429    | cysZ       | putative sulfate transport protein CysZ           | <b>-0.04</b> | 0.94658 |
| STM2430    | cysK       | O-acetylserine sulfhydrylase A                    | <b>-0.03</b> | 0.95995 |
| STM2430    | cysK       | O-acetylserine sulfhydrylase A                    | <b>0.11</b>  | 0.79037 |
| STM2431    | ptsH       | phosphohistidinoprotein-hexose phosphotransferase | <b>0.03</b>  | 0.96595 |
| STM2431    | ptsH       | phosphohistidinoprotein-hexose phosphotransferase | <b>0.39</b>  | 0.34260 |
| STM2432    | ptsI       | PEP-protein phosphotransferase                    | <b>0.18</b>  | 0.66506 |
| STM2432    | ptsI       | PEP-protein phosphotransferase                    | <b>0.20</b>  | 0.65451 |
| STM2433    | crr        | glucose-specific PTS system enzyme IIA component  | <b>0.03</b>  | 0.93841 |
| STM2433    | crr        | glucose-specific PTS system enzyme IIA component  | <b>0.42</b>  | 0.38425 |
| STM2434    | STM2434    | putative cytoplasmic protein                      | <b>-0.43</b> | 0.26856 |
| STM2434    | STM2434    | putative cytoplasmic protein                      | <b>-0.49</b> | 0.35824 |
| STM2435    | pdxK       | pyridoxine kinase                                 | <b>-0.27</b> | 0.61201 |
| STM2435    | pdxK       | pyridoxine kinase                                 | <b>0.34</b>  | 0.33587 |
| STM2436    | ptsJ       | putative regulatory protein                       | <b>0.98</b>  | 0.17919 |
| STM2436    | ptsJ       | putative regulatory protein                       | <b>1.36</b>  | 0.16475 |
| STM2437    | yfeJ       | glutamine amidotransferase                        | <b>-0.66</b> | 0.19142 |
| STM2437    | yfeJ       | glutamine amidotransferase                        | <b>0.23</b>  | 0.61481 |
| STM2438    | yfeK       | putative periplasmic protein                      | <b>0.14</b>  | 0.77346 |

|           |           |                                           |              |         |
|-----------|-----------|-------------------------------------------|--------------|---------|
| STM2438   | yfeK      | putative periplasmic protein              | <b>0.17</b>  | 0.63328 |
| STM2439   | yfeL      | putative membrane carboxypeptidase        | <b>-0.43</b> | 0.48791 |
| STM2439   | yfeL      | putative membrane carboxypeptidase        | <b>-0.29</b> | 0.52861 |
| STM2440   | cysM      | cysteine synthase B                       | <b>-0.15</b> | 0.73568 |
| STM2440   | cysM      | cysteine synthase B                       | <b>0.17</b>  | 0.71864 |
| STM2441   | cysA      | sulfate permease A protein                | <b>-0.06</b> | 0.93264 |
| STM2441   | cysA      | sulfate permease A protein                | <b>-0.06</b> | 0.91784 |
| STM2442   | cysW      | thiosulfate permease W protein            | <b>-0.64</b> | 0.23613 |
| STM2442   | cysW      | thiosulfate permease W protein            | <b>0.92</b>  | 0.26378 |
| STM2443   | cysU      | thiosulfate transport protein             | <b>-0.18</b> | 0.74344 |
| STM2443   | cysU      | thiosulfate transport protein             | <b>0.21</b>  | 0.67097 |
| STM2444   | cysP      | thiosulfate transport protein             | <b>-0.38</b> | 0.60620 |
| STM2444   | cysP      | thiosulfate transport protein             | <b>0.47</b>  | 0.39316 |
| STM2445   | ucpA      | short chain dehydrogenase                 | <b>0.06</b>  | 0.92102 |
| STM2445   | ucpA      | short chain dehydrogenase                 | <b>0.31</b>  | 0.40190 |
| STM2446   | STM2446   | putative iron-dependent peroxidase        | <b>-0.21</b> | 0.62526 |
| STM2446   | STM2446   | putative iron-dependent peroxidase        | <b>-0.30</b> | 0.40947 |
| STM2447   | STM2447   | putative outer membrane lipoprotein       | <b>-0.20</b> | 0.60888 |
| STM2447   | STM2447   | putative outer membrane lipoprotein       | <b>-0.22</b> | 0.63154 |
| STM2448   | yfeZ      | putative inner membrane protein           | <b>-0.41</b> | 0.47136 |
| STM2448   | yfeZ      | putative inner membrane protein           | <b>0.34</b>  | 0.46629 |
| STM2449,S | STM2449,S | putative acetyltransferase                | <b>0.09</b>  | 0.83100 |
| STM2449,S | STM2449,S | putative acetyltransferase                | <b>0.50</b>  | 0.32929 |
| STM2450   | amiA      | N-acetylmuramoyl-L-alanine amidase I      | <b>-0.18</b> | 0.61634 |
| STM2450   | amiA      | N-acetylmuramoyl-L-alanine amidase I      | <b>-0.15</b> | 0.68775 |
| STM2451   | hemF      | coproporphyrinogen III oxidase            | <b>-1.00</b> | 0.06197 |
| STM2451   | hemF      | coproporphyrinogen III oxidase            | <b>0.14</b>  | 0.77923 |
| STM2452   | STM2452   | putative inner membrane protein           | <b>0.07</b>  | 0.87727 |
| STM2452   | STM2452   | putative inner membrane protein           | <b>0.06</b>  | 0.88937 |
| STM2453   | STM2453   | putative cytoplasmic protein              | <b>-0.44</b> | 0.48214 |
| STM2453   | STM2453   | putative cytoplasmic protein              | <b>0.36</b>  | 0.35101 |
| STM2454   | eutR      | putative ethanolamine operon regulator    | <b>-0.13</b> | 0.88060 |
| STM2454   | eutR      | putative ethanolamine operon regulator    | <b>0.13</b>  | 0.80093 |
| STM2455   | eutK      | putative carboxysome structural protein   | <b>-0.16</b> | 0.66807 |
| STM2455   | eutK      | putative carboxysome structural protein   | <b>0.07</b>  | 0.90797 |
| STM2456   | eutL      | putative carboxysome structural protein   | <b>-0.25</b> | 0.55892 |
| STM2456   | eutL      | putative carboxysome structural protein   | <b>0.45</b>  | 0.32172 |
| STM2457   | eutC      | ethanolamine ammonia-lyase small subunit  | <b>-0.48</b> | 0.49871 |
| STM2457   | eutC      | ethanolamine ammonia-lyase small subunit  | <b>-0.18</b> | 0.68143 |
| STM2458   | eutB      | ethanolamine ammonia-lyase heavy chain    | <b>-0.36</b> | 0.73473 |
| STM2458   | eutB      | ethanolamine ammonia-lyase heavy chain    | <b>1.12</b>  | 0.17139 |
| STM2459   | eutA      | ethanolamine utilization protein          | <b>0.08</b>  | 0.89227 |
| STM2459   | eutA      | ethanolamine utilization protein          | <b>0.57</b>  | 0.21501 |
| STM2460   | eutH      | putative transport protein                | <b>-0.05</b> | 0.95176 |
| STM2460   | eutH      | putative transport protein                | <b>0.92</b>  | 0.21699 |
| STM2461   | eutG      | putative transport protein                | <b>0.09</b>  | 0.94050 |
| STM2461   | eutG      | putative transport protein                | <b>-0.09</b> | 0.84622 |
| STM2462   | eutJ      | ethanolamine utilization protein          | <b>-0.03</b> | 0.96785 |
| STM2462   | eutJ      | ethanolamine utilization protein          | <b>0.34</b>  | 0.42507 |
| STM2463   | eutE      | putative aldehyde oxidoreductase          | <b>-0.66</b> | 0.20065 |
| STM2463   | eutE      | putative aldehyde oxidoreductase          | <b>0.11</b>  | 0.78633 |
| STM2464   | eutN      | putative detox protein                    | <b>0.18</b>  | 0.76553 |
| STM2464   | eutN      | putative detox protein                    | <b>0.91</b>  | 0.15276 |
| STM2465   | eutM      | putative detox protein                    | <b>0.25</b>  | 0.63235 |
| STM2465   | eutM      | putative detox protein                    | <b>0.78</b>  | 0.18313 |
| STM2466   | eutD      | phosphate acetyltransferase               | <b>-0.31</b> | 0.57945 |
| STM2466   | eutD      | phosphate acetyltransferase               | <b>0.30</b>  | 0.55661 |
| STM2467   | eutT      | putative cobalamin adenosyltransferase    | <b>-0.15</b> | 0.84109 |
| STM2467   | eutT      | putative cobalamin adenosyltransferase    | <b>-0.32</b> | 0.57138 |
| STM2468   | eutQ      | putative ethanolamine utilization protein | <b>0.24</b>  | 0.72987 |
| STM2468   | eutQ      | putative ethanolamine utilization protein | <b>0.37</b>  | 0.34193 |
| STM2469   | eutP      | putative ethanolamine utilization protein | <b>-0.10</b> | 0.82192 |
| STM2469   | eutP      | putative ethanolamine utilization protein | <b>0.40</b>  | 0.45069 |

|           |         |                                                          |              |         |
|-----------|---------|----------------------------------------------------------|--------------|---------|
| STM2470   | eutS    | putative carboxysome structural protein                  | <b>-0.23</b> | 0.79275 |
| STM2470   | eutS    | putative carboxysome structural protein                  | <b>0.74</b>  | 0.29044 |
| STM2472   | maeB    | phosphate acetyltransferase                              | <b>0.05</b>  | 0.94565 |
| STM2472   | maeB    | phosphate acetyltransferase                              | <b>0.15</b>  | 0.77346 |
| STM2473   | talA    | transaldolase                                            | <b>-0.21</b> | 0.70155 |
| STM2473   | talA    | transaldolase                                            | <b>0.43</b>  | 0.37855 |
| STM2474   | tktB    | transketolase                                            | <b>-0.21</b> | 0.73653 |
| STM2474   | tktB    | transketolase                                            | <b>-0.03</b> | 0.97140 |
| STM2475   | STM2475 | putative cytoplasmic protein                             | <b>-0.04</b> | 0.97273 |
| STM2475   | STM2475 | putative cytoplasmic protein                             | <b>0.49</b>  | 0.42312 |
| STM2476   | ypfG    | putative periplasmic protein                             | <b>-0.13</b> | 0.79371 |
| STM2476   | ypfG    | putative periplasmic protein                             | <b>0.26</b>  | 0.66555 |
| STM2477   | yffH    | putative pyrophosphohydrolase                            | <b>-0.01</b> | 0.98640 |
| STM2477   | yffH    | putative pyrophosphohydrolase                            | <b>0.38</b>  | 0.31344 |
| STM2478   | STM2478 | hypothetical protein STM2478                             | <b>0.18</b>  | 0.72247 |
| STM2478   | STM2478 | hypothetical protein STM2478                             | <b>0.25</b>  | 0.76538 |
| STM2479   | aegA    | putative oxidoreductase                                  | <b>0.49</b>  | 0.73175 |
| STM2479   | aegA    | putative oxidoreductase                                  | <b>0.50</b>  | 0.52846 |
| STM2480   | narQ    | sensory histidine kinase                                 | <b>-0.31</b> | 0.44331 |
| STM2480   | narQ    | sensory histidine kinase                                 | <b>0.32</b>  | 0.44210 |
| STM2481   | acrD    | aminoglycoside/multidrug efflux pump                     | <b>-0.21</b> | 0.79241 |
| STM2481   | acrD    | aminoglycoside/multidrug efflux pump                     | <b>0.11</b>  | 0.81737 |
| STM2482   | yffB    | putative glutaredoxin                                    | <b>0.11</b>  | 0.76622 |
| STM2482   | yffB    | putative glutaredoxin                                    | <b>-0.02</b> | 0.95663 |
| STM2483   | dapE    | succinyl-diaminopimelate desuccinylase                   | <b>-0.10</b> | 0.84473 |
| STM2483   | dapE    | succinyl-diaminopimelate desuccinylase                   | <b>0.21</b>  | 0.55482 |
| STM2484   | STM2484 | putative inner membrane protein                          | <b>-0.71</b> | 0.16534 |
| STM2484   | STM2484 | putative inner membrane protein                          | <b>0.26</b>  | 0.61407 |
| STM2485   | ypfI    | putative acetyltransferase                               | <b>0.04</b>  | 0.94417 |
| STM2485   | ypfI    | putative acetyltransferase                               | <b>0.01</b>  | 0.99447 |
| STM2486   | STM2486 | putative inner membrane protein                          | <b>0.06</b>  | 0.89004 |
| STM2486   | STM2486 | putative inner membrane protein                          | <b>0.02</b>  | 0.97720 |
| STM2487   | purC    | phosphoribosylaminoimidazole-succinocarboxamide synthase | <b>-0.08</b> | 0.85680 |
| STM2487   | purC    | phosphoribosylaminoimidazole-succinocarboxamide synthase | <b>0.20</b>  | 0.69192 |
| STM2488   | nlpB    | lipoprotein                                              | <b>0.08</b>  | 0.85718 |
| STM2488   | nlpB    | lipoprotein                                              | <b>0.25</b>  | 0.60052 |
| STM2489   | dapA    | dihydrodipicolinate synthase                             | <b>0.02</b>  | 0.98237 |
| STM2489   | dapA    | dihydrodipicolinate synthase                             | <b>0.00</b>  | 0.99829 |
| STM2490   | gcvR    | gcv operon transcriptional repressor                     | <b>0.13</b>  | 0.73542 |
| STM2490   | gcvR    | gcv operon transcriptional repressor                     | <b>0.41</b>  | 0.33452 |
| STM2491   | bcp     | bacterioferritin comigratory protein                     | <b>0.00</b>  | 0.99929 |
| STM2491   | bcp     | bacterioferritin comigratory protein                     | <b>0.42</b>  | 0.25125 |
| STM2492   | STM2492 | putative glycerate kinase                                | <b>-0.47</b> | 0.36942 |
| STM2492   | STM2492 | putative glycerate kinase                                | <b>-0.01</b> | 0.99009 |
| STM2493   | perM    | putative permease                                        | <b>-0.09</b> | 0.84077 |
| STM2493   | perM    | putative permease                                        | <b>0.22</b>  | 0.60051 |
| STM2494   | STM2494 | hypothetical protein STM2494                             | <b>-0.50</b> | 0.25620 |
| STM2494   | STM2494 | hypothetical protein STM2494                             | <b>0.06</b>  | 0.93011 |
| STM2495   | yfgD    | putative arsenate reductase                              | <b>0.11</b>  | 0.86951 |
| STM2495   | yfgD    | putative arsenate reductase                              | <b>0.02</b>  | 0.98212 |
| STM2496   | yfgE    | DNA replication initiation factor                        | <b>-0.63</b> | 0.23570 |
| STM2496   | yfgE    | DNA replication initiation factor                        | <b>0.43</b>  | 0.42409 |
| STM2497   | uraA    | uracil transport protein                                 | <b>-0.39</b> | 0.29285 |
| STM2497   | uraA    | uracil transport protein                                 | <b>0.13</b>  | 0.82624 |
| STM2498   | upp     | uracil phosphoribosyltransferase                         | <b>-0.14</b> | 0.75137 |
| STM2498   | upp     | uracil phosphoribosyltransferase                         | <b>-0.22</b> | 0.60249 |
| STM2499,S | purM    | phosphoribosylaminoimidazole synthetase                  | <b>-0.25</b> | 0.55482 |
| STM2499,S | purM    | phosphoribosylaminoimidazole synthetase                  | <b>0.42</b>  | 0.36543 |
| STM2500   | purN    | phosphoribosylglycinamide formyltransferase              | <b>0.03</b>  | 0.96785 |
| STM2500   | purN    | phosphoribosylglycinamide formyltransferase              | <b>0.28</b>  | 0.49336 |
| STM2501   | ppk     | polyphosphate kinase                                     | <b>-0.51</b> | 0.33587 |

|         |         |                                                      |              |         |
|---------|---------|------------------------------------------------------|--------------|---------|
| STM2501 | ppk     | polyphosphate kinase                                 | <b>0.21</b>  | 0.56389 |
| STM2502 | ppx     | exopolyphosphatase                                   | <b>-0.81</b> | 0.19843 |
| STM2502 | ppx     | exopolyphosphatase                                   | <b>0.00</b>  | 0.99887 |
| STM2503 | STM2503 | putative diguanylate cyclase                         | <b>-0.67</b> | 0.19843 |
| STM2503 | STM2503 | putative diguanylate cyclase                         | <b>-0.05</b> | 0.93582 |
| STM2506 | STM2506 | putative inner membrane protein                      | <b>-0.65</b> | 0.21015 |
| STM2506 | STM2506 | putative inner membrane protein                      | <b>0.42</b>  | 0.38044 |
| STM2509 | STM2509 | putative transposase                                 | <b>-0.71</b> | 0.39127 |
| STM2509 | STM2509 | putative transposase                                 | <b>0.01</b>  | 0.99009 |
|         |         | bifunctional GMP synthase/glutamine amidotransferase |              |         |
| STM2510 | guaA    | protein                                              | <b>-0.20</b> | 0.60687 |
|         |         | bifunctional GMP synthase/glutamine amidotransferase |              |         |
| STM2510 | guaA    | protein                                              | <b>0.08</b>  | 0.87126 |
| STM2511 | guaB    | inositol-5-monophosphate dehydrogenase               | <b>-0.18</b> | 0.68032 |
| STM2511 | guaB    | inositol-5-monophosphate dehydrogenase               | <b>-0.18</b> | 0.68961 |
| STM2512 | xseA    | exodeoxyribonuclease VII large subunit               | <b>-0.63</b> | 0.20730 |
| STM2512 | xseA    | exodeoxyribonuclease VII large subunit               | <b>0.30</b>  | 0.63235 |
| STM2513 | shdA    | AIDA autotransporter-like protein                    | <b>-0.34</b> | 0.59821 |
| STM2513 | shdA    | AIDA autotransporter-like protein                    | <b>-0.09</b> | 0.87667 |
| STM2514 | ratB    | putative outer membrane protein                      | <b>0.10</b>  | 0.86861 |
| STM2514 | ratB    | putative outer membrane protein                      | <b>0.05</b>  | 0.90733 |
| STM2515 | ratA    | putative outer membrane protein                      | <b>0.22</b>  | 0.61824 |
| STM2515 | ratA    | putative outer membrane protein                      | <b>0.45</b>  | 0.50602 |
| STM2516 | sinI    | putative outer membrane protein                      | <b>0.03</b>  | 0.96278 |
| STM2516 | sinI    | putative outer membrane protein                      | <b>0.28</b>  | 0.65145 |
| STM2517 | sinH    | intimin-like protein                                 | <b>-0.16</b> | 0.89487 |
| STM2517 | sinH    | intimin-like protein                                 | <b>0.53</b>  | 0.29848 |
| STM2518 | yfgJ    | putative cytoplasmic protein                         | <b>0.11</b>  | 0.75851 |
| STM2518 | yfgJ    | putative cytoplasmic protein                         | <b>0.14</b>  | 0.76502 |
| STM2519 | engA    | GTP-binding protein EngA                             | <b>-0.51</b> | 0.34633 |
| STM2519 | engA    | GTP-binding protein EngA                             | <b>0.19</b>  | 0.67097 |
| STM2520 | yfgL    | putative serine/threonine protein kinase             | <b>0.00</b>  | 0.99540 |
| STM2520 | yfgL    | putative serine/threonine protein kinase             | <b>-0.25</b> | 0.64525 |
| STM2521 | yfgM    | putative inner membrane protein                      | <b>-0.08</b> | 0.85977 |
| STM2521 | yfgM    | putative inner membrane protein                      | <b>0.64</b>  | 0.16752 |
| STM2522 | hisS    | histidyl-tRNA synthetase                             | <b>-0.34</b> | 0.34666 |
| STM2522 | hisS    | histidyl-tRNA synthetase                             | <b>-0.23</b> | 0.51979 |
| STM2523 | gcpE    | 4-hydroxy-3-methylbut-2-en-1-yl diphosphate synthase | <b>-0.05</b> | 0.91484 |
| STM2523 | gcpE    | 4-hydroxy-3-methylbut-2-en-1-yl diphosphate synthase | <b>0.17</b>  | 0.68450 |
| STM2524 | yfgA    | hypothetical protein STM2524                         | <b>-0.30</b> | 0.53827 |
| STM2524 | yfgA    | hypothetical protein STM2524                         | <b>0.16</b>  | 0.66805 |
| STM2525 | yfgB    | putative FeS redox enzyme                            | <b>-0.01</b> | 0.98352 |
| STM2525 | yfgB    | putative FeS redox enzyme                            | <b>0.01</b>  | 0.98398 |
| STM2526 | ndk     | nucleoside diphosphate kinase                        | <b>0.19</b>  | 0.60249 |
| STM2526 | ndk     | nucleoside diphosphate kinase                        | <b>0.27</b>  | 0.44568 |
| STM2527 | STM2527 | putative polyferredoxin                              | <b>-0.04</b> | 0.93916 |
| STM2527 | STM2527 | putative polyferredoxin                              | <b>0.20</b>  | 0.57469 |
| STM2528 | STM2528 | putative dimethylsulfoxide reductase                 | <b>0.00</b>  | 0.99929 |
| STM2528 | STM2528 | putative dimethylsulfoxide reductase                 | <b>0.54</b>  | 0.22602 |
| STM2529 | STM2529 | putative anaerobic dimethylsulfoxide reductase       | <b>-0.25</b> | 0.69882 |
| STM2529 | STM2529 | putative anaerobic dimethylsulfoxide reductase       | <b>-0.31</b> | 0.57804 |
| STM2530 | STM2530 | putative anaerobic dimethylsulfoxide reductase       | <b>-0.29</b> | 0.53454 |
| STM2530 | STM2530 | putative anaerobic dimethylsulfoxide reductase       | <b>0.81</b>  | 0.35010 |
| STM2531 | pbpC    | penicillin-binding protein 1c                        | <b>-0.19</b> | 0.74779 |
| STM2531 | pbpC    | penicillin-binding protein 1c                        | <b>0.83</b>  | 0.17139 |
| STM2532 | STM2532 | putative inner membrane lipoprotein                  | <b>-0.03</b> | 0.96247 |
| STM2532 | STM2532 | putative inner membrane lipoprotein                  | <b>0.00</b>  | 0.99997 |
| STM2533 | sseA    | putative sulfurtransferase                           | <b>0.00</b>  | 0.99928 |
| STM2533 | sseA    | putative sulfurtransferase                           | <b>0.16</b>  | 0.78453 |
| STM2534 | STM2534 | putative cytoplasmic protein                         | <b>-0.48</b> | 0.38596 |
| STM2534 | STM2534 | putative cytoplasmic protein                         | <b>0.06</b>  | 0.91571 |
| STM2535 | sseB    | enhanced serine sensitivity protein                  | <b>-0.06</b> | 0.88404 |
| STM2535 | sseB    | enhanced serine sensitivity protein                  | <b>0.03</b>  | 0.95663 |

|         |         |                                                       |              |         |
|---------|---------|-------------------------------------------------------|--------------|---------|
| STM2536 | pepB    | aminopeptidase B                                      | <b>-0.31</b> | 0.46915 |
| STM2536 | pepB    | aminopeptidase B                                      | <b>0.01</b>  | 0.99213 |
| STM2537 | yfhJ    | hypothetical protein STM2537                          | <b>-0.51</b> | 0.25759 |
| STM2537 | yfhJ    | hypothetical protein STM2537                          | <b>-0.41</b> | 0.33452 |
| STM2538 | fdx     | electron carrer protein                               | <b>-0.01</b> | 0.98348 |
| STM2538 | fdx     | electron carrer protein                               | <b>0.15</b>  | 0.72135 |
| STM2539 | hscA    | chaperone protein HscA                                | <b>-0.31</b> | 0.47130 |
| STM2539 | hscA    | chaperone protein HscA                                | <b>-0.12</b> | 0.76538 |
| STM2540 | hscB    | co-chaperone HscB                                     | <b>-0.22</b> | 0.52728 |
| STM2540 | hscB    | co-chaperone HscB                                     | <b>-0.16</b> | 0.68232 |
| STM2541 | iscA    | iron-sulfur cluster assembly protein                  | <b>-0.20</b> | 0.66677 |
| STM2541 | iscA    | iron-sulfur cluster assembly protein                  | <b>0.34</b>  | 0.52804 |
| STM2542 | nifU    | NifU-like protein                                     | <b>-0.35</b> | 0.56569 |
| STM2542 | nifU    | NifU-like protein                                     | <b>-0.10</b> | 0.82656 |
| STM2543 | nifS    | cysteine desulfurase                                  | <b>0.25</b>  | 0.55976 |
| STM2543 | nifS    | cysteine desulfurase                                  | <b>0.28</b>  | 0.55338 |
| STM2544 | yfhP    | putative iron-sulfur cluster regulatory protein       | <b>-0.08</b> | 0.88018 |
| STM2544 | yfhP    | putative iron-sulfur cluster regulatory protein       | <b>0.03</b>  | 0.94050 |
| STM2545 | STM2545 | putative rRNA methylase                               | <b>-0.20</b> | 0.66594 |
| STM2545 | STM2545 | putative rRNA methylase                               | <b>0.50</b>  | 0.27004 |
| STM2546 | suhB    | inositol monophosphatase                              | <b>0.69</b>  | 0.22283 |
| STM2546 | suhB    | inositol monophosphatase                              | <b>-0.14</b> | 0.92716 |
| STM2547 | STM2547 | putative hydrolase                                    | <b>-0.16</b> | 0.78211 |
| STM2547 | STM2547 | putative hydrolase                                    | <b>0.00</b>  | 0.99938 |
| STM2548 | asrA    | anaerobic sulfide reductase                           | <b>-0.21</b> | 0.55482 |
| STM2548 | asrA    | anaerobic sulfide reductase                           | <b>0.26</b>  | 0.61130 |
| STM2549 | asrB    | anaerobic sulfite reductase subunit B                 | <b>-0.23</b> | 0.64742 |
| STM2549 | asrB    | anaerobic sulfite reductase subunit B                 | <b>0.14</b>  | 0.82667 |
| STM2550 | asrC    | anaerobic sulfide reductase                           | <b>-0.44</b> | 0.43286 |
| STM2550 | asrC    | anaerobic sulfide reductase                           | <b>0.22</b>  | 0.65130 |
| STM2551 | STM2551 | putative inner membrane protein                       | <b>-0.17</b> | 0.74374 |
| STM2551 | STM2551 | putative inner membrane protein                       | <b>0.50</b>  | 0.46184 |
| STM2552 | STM2552 | hypothetical protein STM2552                          | <b>-0.42</b> | 0.26213 |
| STM2552 | STM2552 | hypothetical protein STM2552                          | <b>0.44</b>  | 0.31775 |
| STM2553 | csiE    | stationary phase-inducible protein                    | <b>-0.33</b> | 0.37154 |
| STM2553 | csiE    | stationary phase-inducible protein                    | <b>0.59</b>  | 0.16039 |
| STM2554 | hcaT    | putative transport protein                            | <b>-0.27</b> | 0.57696 |
| STM2554 | hcaT    | putative transport protein                            | <b>-0.17</b> | 0.68708 |
| STM2555 | glyA    | serine hydroxymethyltransferase                       | <b>0.17</b>  | 0.66729 |
| STM2555 | glyA    | serine hydroxymethyltransferase                       | <b>0.33</b>  | 0.55892 |
| STM2556 | hmpA    | dihydropteridine reductase 2/nitric oxide dioxygenase | <b>-0.38</b> | 0.44416 |
| STM2556 | hmpA    | dihydropteridine reductase 2/nitric oxide dioxygenase | <b>0.50</b>  | 0.22049 |
| STM2557 | cadC    | transcriptional activator                             | <b>-0.27</b> | 0.46720 |
| STM2557 | cadC    | transcriptional activator                             | <b>-0.27</b> | 0.47838 |
| STM2558 | cadB    | lysine/cadaverine transport protein                   | <b>-0.42</b> | 0.32760 |
| STM2558 | cadB    | lysine/cadaverine transport protein                   | <b>0.85</b>  | 0.13027 |
| STM2559 | cadA    | lysine decarboxylase 1                                | <b>-0.02</b> | 0.98855 |
| STM2559 | cadA    | lysine decarboxylase 1                                | <b>-0.29</b> | 0.64465 |
| STM2560 | yjdL    | putative di-/tripeptide transport protein             | <b>-0.22</b> | 0.64422 |
| STM2560 | yjdL    | putative di-/tripeptide transport protein             | <b>0.67</b>  | 0.13206 |
| STM2561 | glnB    | regulatory protein P-II                               | <b>0.02</b>  | 0.96785 |
| STM2561 | glnB    | regulatory protein P-II                               | <b>0.15</b>  | 0.80175 |
| STM2562 | yfhA    | putative transcriptional regulator                    | <b>-0.43</b> | 0.29871 |
| STM2562 | yfhA    | putative transcriptional regulator                    | <b>-0.07</b> | 0.89140 |
| STM2563 | yfhG    | putative transcriptional regulator                    | <b>-0.15</b> | 0.79093 |
| STM2563 | yfhG    | putative transcriptional regulator                    | <b>-0.13</b> | 0.78399 |
| STM2564 | yfhK    | putative sensor kinase                                | <b>-0.24</b> | 0.60311 |
| STM2564 | yfhK    | putative sensor kinase                                | <b>0.06</b>  | 0.93023 |
| STM2565 | purG    | phosphoribosylformylglycinamide synthase              | <b>-0.88</b> | 0.15276 |
| STM2565 | purG    | phosphoribosylformylglycinamide synthase              | <b>-0.21</b> | 0.71864 |
| STM2567 | yfhD    | putative periplasmic amino acid-binding protein       | <b>-0.20</b> | 0.62216 |
| STM2567 | yfhD    | putative periplasmic amino acid-binding protein       | <b>-0.09</b> | 0.87740 |
| STM2568 | yfhC    | putative cytosine/adenosine deaminase                 | <b>-0.09</b> | 0.83240 |

|         |         |                                                  |              |         |
|---------|---------|--------------------------------------------------|--------------|---------|
| STM2568 | yfhC    | putative cytosine/adenosine deaminase            | <b>0.45</b>  | 0.49871 |
| STM2569 | yfhB    | putative phosphoserine phosphatase               | <b>-0.25</b> | 0.62199 |
| STM2569 | yfhB    | putative phosphoserine phosphatase               | <b>0.41</b>  | 0.34690 |
| STM2570 | STM2570 | putative phosphotransferase system IIB component | <b>-0.15</b> | 0.72149 |
| STM2570 | STM2570 | putative phosphotransferase system IIB component | <b>-0.04</b> | 0.94279 |
| STM2571 | STM2571 | hypothetical protein STM2571                     | <b>-0.01</b> | 0.98612 |
| STM2571 | STM2571 | hypothetical protein STM2571                     | <b>0.22</b>  | 0.63222 |
| STM2572 | yfhH    | putative transport protein                       | <b>0.01</b>  | 0.98718 |
| STM2572 | yfhH    | putative transport protein                       | <b>0.19</b>  | 0.60629 |
| STM2573 | STM2573 | 2-dehydropantoate 2-reductase                    | <b>-0.24</b> | 0.60574 |
| STM2573 | STM2573 | 2-dehydropantoate 2-reductase                    | <b>-0.07</b> | 0.91047 |
| STM2574 | STM2574 | putative permease                                | <b>-0.34</b> | 0.52765 |
| STM2574 | STM2574 | putative permease                                | <b>-0.14</b> | 0.80539 |
| STM2575 | STM2575 | putative transcriptional regulator               | <b>-0.26</b> | 0.55482 |
| STM2575 | STM2575 | putative transcriptional regulator               | <b>0.30</b>  | 0.69241 |
| STM2576 | yfhL    | putative ferredoxin                              | <b>-0.26</b> | 0.64880 |
| STM2576 | yfhL    | putative ferredoxin                              | <b>0.10</b>  | 0.83443 |
| STM2577 | acpS    | 4'-phosphopantetheinyl transferase               | <b>-0.27</b> | 0.46629 |
| STM2577 | acpS    | 4'-phosphopantetheinyl transferase               | <b>-0.29</b> | 0.46862 |
| STM2578 | pdxJ    | pyridoxal phosphate biosynthetic protein         | <b>-0.89</b> | 0.13509 |
| STM2578 | pdxJ    | pyridoxal phosphate biosynthetic protein         | <b>0.00</b>  | 0.99755 |
| STM2579 | recO    | DNA repair protein RecO                          | <b>-0.03</b> | 0.94529 |
| STM2579 | recO    | DNA repair protein RecO                          | <b>0.00</b>  | 0.99660 |
| STM2580 | era     | GTP-binding protein Era                          | <b>-0.05</b> | 0.91389 |
| STM2580 | era     | GTP-binding protein Era                          | <b>0.34</b>  | 0.36311 |
| STM2581 | rncS    | ribonuclease III                                 | <b>-0.18</b> | 0.62403 |
| STM2581 | rncS    | ribonuclease III                                 | <b>-0.14</b> | 0.79180 |
| STM2582 | lepB    | signal peptidase I                               | <b>-0.14</b> | 0.72247 |
| STM2582 | lepB    | signal peptidase I                               | <b>-0.16</b> | 0.64489 |
| STM2583 | lepA    | GTP-binding protein LepA                         | <b>-0.21</b> | 0.60595 |
| STM2583 | lepA    | GTP-binding protein LepA                         | <b>0.03</b>  | 0.95384 |
| STM2584 | gogB    | leucine-rich repeat protein [Phage Gifsy-1]      | <b>-0.16</b> | 0.72970 |
| STM2584 | gogB    | leucine-rich repeat protein [Phage Gifsy-1]      | <b>-0.23</b> | 0.59675 |
| STM2586 | STM2586 | phage tail assembly-like protein                 | <b>-1.08</b> | 0.17330 |
| STM2586 | STM2586 | phage tail assembly-like protein                 | <b>-0.22</b> | 0.70229 |
| STM2587 | STM2587 | phage tail assembly-like protein                 | <b>-0.85</b> | 0.19398 |
| STM2587 | STM2587 | phage tail assembly-like protein                 | <b>0.50</b>  | 0.36341 |
| STM2588 | STM2588 | tail fiber-like protein                          | <b>-0.64</b> | 0.35937 |
| STM2588 | STM2588 | tail fiber-like protein                          | <b>-0.22</b> | 0.63101 |
| STM2589 | STM2589 | host specificity protein-J-like                  | <b>-0.42</b> | 0.35853 |
| STM2589 | STM2589 | host specificity protein-J-like                  | <b>-0.08</b> | 0.87909 |
| STM2590 | STM2590 | tail assembly protein I-like                     | <b>-0.18</b> | 0.76811 |
| STM2590 | STM2590 | tail assembly protein I-like                     | <b>0.56</b>  | 0.77130 |
| STM2591 | STM2591 | tail assembly protein K-like                     | <b>-0.61</b> | 0.23697 |
| STM2591 | STM2591 | tail assembly protein K-like                     | <b>0.31</b>  | 0.49117 |
| STM2592 | STM2592 | phage tail component L-like protein              | <b>-0.73</b> | 0.21855 |
| STM2592 | STM2592 | phage tail component L-like protein              | <b>0.18</b>  | 0.72518 |
| STM2593 | STM2593 | phage tail component M-like protein              | <b>-0.50</b> | 0.35619 |
| STM2593 | STM2593 | phage tail component M-like protein              | <b>-0.02</b> | 0.98127 |
| STM2594 | STM2594 | phage tail component H-like protein              | <b>-0.40</b> | 0.55364 |
| STM2594 | STM2594 | phage tail component H-like protein              | <b>0.02</b>  | 0.98718 |
| STM2595 | STM2595 | minor tail-like protein                          | <b>-0.59</b> | 0.45739 |
| STM2595 | STM2595 | minor tail-like protein                          | <b>0.44</b>  | 0.38668 |
| STM2596 | STM2596 | minor tail-like protein                          | <b>-0.33</b> | 0.50458 |
| STM2596 | STM2596 | minor tail-like protein                          | <b>0.65</b>  | 0.17327 |
| STM2597 | STM2597 | major tail-like protein                          | <b>-0.08</b> | 0.87116 |
| STM2597 | STM2597 | major tail-like protein                          | <b>1.03</b>  | 0.32016 |
| STM2598 | STM2598 | hypothetical protein STM2598                     | <b>-0.83</b> | 0.32760 |
| STM2598 | STM2598 | hypothetical protein STM2598                     | <b>0.14</b>  | 0.83443 |
| STM2599 | STM2599 | putative virulence protein [Phage Gifsy-1]       | <b>-0.23</b> | 0.67388 |
| STM2599 | STM2599 | putative virulence protein [Phage Gifsy-1]       | <b>-0.05</b> | 0.91597 |
| STM2600 | STM2600 | minor tail protein Z-like                        | <b>0.28</b>  | 0.52511 |
| STM2600 | STM2600 | minor tail protein Z-like                        | <b>0.56</b>  | 0.45800 |

|           |           |                                                        |              |         |
|-----------|-----------|--------------------------------------------------------|--------------|---------|
| STM2601   | STM2601   | minor capsid protein FII                               | <b>-0.20</b> | 0.69297 |
| STM2601   | STM2601   | minor capsid protein FII                               | <b>0.57</b>  | 0.45374 |
| STM2602   | STM2602   | DNA packaging-like protein                             | <b>-0.53</b> | 0.30481 |
| STM2602   | STM2602   | DNA packaging-like protein                             | <b>0.30</b>  | 0.61285 |
| STM2603   | STM2603   | phage head-like protein                                | <b>-0.29</b> | 0.63702 |
| STM2603   | STM2603   | phage head-like protein                                | <b>0.00</b>  | 0.99742 |
| STM2604   | STM2604   | phage head-like protein                                | <b>-0.05</b> | 0.94087 |
| STM2604   | STM2604   | phage head-like protein                                | <b>0.52</b>  | 0.52511 |
| STM2605   | STM2605   | head-tail preconnector-like protein                    | <b>-0.32</b> | 0.42674 |
| STM2605   | STM2605   | head-tail preconnector-like protein                    | <b>0.94</b>  | 0.16324 |
| STM2606   | STM2606   | head-tail preconnector-like protein                    | <b>0.68</b>  | 0.60034 |
| STM2606   | STM2606   | head-tail preconnector-like protein                    | <b>2.02</b>  | 0.17318 |
| STM2607   | STM2607   | head-to-tail joining-like protein                      | <b>-0.28</b> | 0.81667 |
| STM2607   | STM2607   | head-to-tail joining-like protein                      | <b>0.05</b>  | 0.96027 |
| STM2608   | STM2608   | terminase-like large protein                           | <b>-0.65</b> | 0.28078 |
| STM2608   | STM2608   | terminase-like large protein                           | <b>-0.14</b> | 0.81455 |
| STM2609   | STM2609   | DNA packaging-like protein                             | <b>-0.54</b> | 0.62403 |
| STM2609   | STM2609   | DNA packaging-like protein                             | <b>0.88</b>  | 0.23918 |
| STM2610   | STM2610   | hypothetical protein STM2610 [Phage Gifsy-1]           | <b>-0.56</b> | 0.38894 |
| STM2610   | STM2610   | hypothetical protein STM2610 [Phage Gifsy-1]           | <b>-0.43</b> | 0.48063 |
| STM2611,S | STM2611,S | endopeptidase-like protein                             | <b>-0.30</b> | 0.55008 |
| STM2611,S | STM2611,S | endopeptidase-like protein                             | <b>0.58</b>  | 0.23434 |
| STM2612   | STM2612   | morphogenesis-like protein                             | <b>-0.28</b> | 0.69462 |
| STM2612   | STM2612   | morphogenesis-like protein                             | <b>0.17</b>  | 0.81323 |
| STM2613   | STM2613   | hypothetical protein STM2613                           | <b>-0.69</b> | 0.23879 |
| STM2613   | STM2613   | hypothetical protein STM2613                           | <b>-0.35</b> | 0.41717 |
| STM2613   | STM2613   | hypothetical protein STM2613                           | <b>0.14</b>  | 0.76622 |
| STM2613   | STM2613   | hypothetical protein STM2613                           | <b>0.29</b>  | 0.61960 |
| STM2614   | STM2614   | hypothetical protein STM2614 [Phage Gifsy-1]           | <b>-0.16</b> | 0.87208 |
| STM2614   | STM2614   | hypothetical protein STM2614 [Phage Gifsy-1]           | <b>-0.17</b> | 0.78210 |
| STM2614   | STM2614   | hypothetical protein STM2614 [Phage Gifsy-1]           | <b>0.26</b>  | 0.75387 |
| STM2614   | STM2614   | hypothetical protein STM2614 [Phage Gifsy-1]           | <b>0.36</b>  | 0.40227 |
| STM2615   | -         | STM2615                                                | <b>-0.88</b> | 0.18763 |
| STM2615   | -         | STM2615                                                | <b>-0.53</b> | 0.34960 |
| STM2616   | STM2616   | antirepressor-like protein                             | <b>0.01</b>  | 0.98372 |
| STM2616   | STM2616   | antirepressor-like protein                             | <b>0.50</b>  | 0.28030 |
| STM2617   | STM2617   | antiterminator-like protein                            | <b>-1.29</b> | 0.16490 |
| STM2617   | STM2617   | antiterminator-like protein                            | <b>-0.42</b> | 0.41422 |
| STM2619   | STM2619   | hypothetical protein STM2619                           | <b>-0.53</b> | 0.58246 |
| STM2619   | STM2619   | hypothetical protein STM2619                           | <b>0.62</b>  | 0.22421 |
| STM2621   | STM2621   | hypothetical protein STM2621                           | <b>-0.58</b> | 0.23989 |
| STM2621   | STM2621   | hypothetical protein STM2621                           | <b>-0.59</b> | 0.34541 |
| STM2621   | STM2621   | hypothetical protein STM2621                           | <b>0.05</b>  | 0.93656 |
| STM2621   | STM2621   | hypothetical protein STM2621                           | <b>-0.42</b> | 0.42733 |
| STM2622   | STM2622   | hypothetical protein STM2622                           | <b>-0.32</b> | 0.36818 |
| STM2622   | STM2622   | hypothetical protein STM2622                           | <b>0.08</b>  | 0.87496 |
| STM2623   | STM2623   | hypothetical protein STM2623                           | <b>-0.42</b> | 0.35824 |
| STM2623   | STM2623   | hypothetical protein STM2623                           | <b>-0.24</b> | 0.62757 |
| STM2624   | STM2624   | hypothetical protein STM2624                           | <b>0.02</b>  | 0.99009 |
| STM2624   | STM2624   | hypothetical protein STM2624                           | <b>0.84</b>  | 0.51014 |
| STM2625   | STM2625   | DNA replication protein DnaC                           | <b>-0.13</b> | 0.75371 |
| STM2625   | STM2625   | DNA replication protein DnaC                           | <b>0.09</b>  | 0.84187 |
| STM2626   | STM2626   | replication protein 15-like                            | <b>-0.28</b> | 0.76016 |
| STM2626   | STM2626   | replication protein 15-like                            | <b>0.78</b>  | 0.15315 |
| STM2630   | STM2630   | hypothetical protein STM2630 [Phage Gifsy-1]           | <b>-0.15</b> | 0.82350 |
| STM2630   | STM2630   | hypothetical protein STM2630 [Phage Gifsy-1]           | <b>-0.19</b> | 0.71884 |
| STM2632   | STM2632   | exodeoxyribonuclease VIII-like protein [Phage Gifsy-1] | <b>0.43</b>  | 0.53679 |
| STM2632   | STM2632   | exodeoxyribonuclease VIII-like protein [Phage Gifsy-1] | <b>1.43</b>  | 0.13824 |
| STM2634   | STM2634   | putative cytoplasmic protein [Phage Gifsy-1]           | <b>-0.18</b> | 0.91111 |
| STM2634   | STM2634   | putative cytoplasmic protein [Phage Gifsy-1]           | <b>0.26</b>  | 0.70472 |
| STM2634   | STM2634   | putative cytoplasmic protein [Phage Gifsy-1]           | <b>-0.34</b> | 0.65779 |
| STM2634   | STM2634   | putative cytoplasmic protein [Phage Gifsy-1]           | <b>0.14</b>  | 0.76008 |
| STM2634   | STM2634   | putative cytoplasmic protein [Phage Gifsy-1]           | <b>-0.02</b> | 0.96850 |

|         |         |                                                  |              |         |
|---------|---------|--------------------------------------------------|--------------|---------|
| STM2634 | STM2634 | putative cytoplasmic protein [Phage Gifsy-1]     | <b>0.09</b>  | 0.84788 |
| STM2636 | STM2636 | integrase-like protein                           | <b>-0.37</b> | 0.36465 |
| STM2636 | STM2636 | integrase-like protein                           | <b>0.51</b>  | 0.29543 |
| STM2637 | rseC    | sigma E regulator                                | <b>0.17</b>  | 0.67092 |
| STM2637 | rseC    | sigma E regulator                                | <b>0.27</b>  | 0.66716 |
| STM2638 | rseB    | periplasmic negative regulator of sigmaE         | <b>-0.05</b> | 0.90605 |
| STM2638 | rseB    | periplasmic negative regulator of sigmaE         | <b>-0.18</b> | 0.62614 |
| STM2639 | rseA    | anti sigma-E factor                              | <b>-0.32</b> | 0.76240 |
| STM2639 | rseA    | anti sigma-E factor                              | <b>0.71</b>  | 0.29871 |
| STM2640 | rpoE    | RNA polymerase sigma-70 factor                   | <b>0.15</b>  | 0.68314 |
| STM2640 | rpoE    | RNA polymerase sigma-70 factor                   | <b>0.06</b>  | 0.89132 |
| STM2641 | nadB    | L-aspartate oxidase                              | <b>-0.30</b> | 0.41996 |
| STM2641 | nadB    | L-aspartate oxidase                              | <b>0.27</b>  | 0.68450 |
| STM2642 | yfiC    | putative transferase                             | <b>-0.16</b> | 0.69398 |
| STM2642 | yfiC    | putative transferase                             | <b>0.00</b>  | 0.99861 |
| STM2643 | srmB    | ATP-dependent RNA helicase                       | <b>-0.65</b> | 0.18873 |
| STM2643 | srmB    | ATP-dependent RNA helicase                       | <b>-0.31</b> | 0.49369 |
| STM2644 | yfiE    | putative transcriptional regulator               | <b>-0.03</b> | 0.95396 |
| STM2644 | yfiE    | putative transcriptional regulator               | <b>-0.16</b> | 0.66677 |
| STM2645 | yfiK    | putative transport protein                       | <b>-0.20</b> | 0.64658 |
| STM2645 | yfiK    | putative transport protein                       | <b>0.04</b>  | 0.94050 |
| STM2646 | yfiD    | putative formate acetyltransferase               | <b>-0.26</b> | 0.61811 |
| STM2646 | yfiD    | putative formate acetyltransferase               | <b>0.65</b>  | 0.19284 |
| STM2647 | ung     | uracil-DNA glycosylase                           | <b>-0.21</b> | 0.68032 |
| STM2647 | ung     | uracil-DNA glycosylase                           | <b>-0.13</b> | 0.79772 |
| STM2648 | yfiF    | putative tRNA/rRNA methyltransferase             | <b>-0.57</b> | 0.21015 |
| STM2648 | yfiF    | putative tRNA/rRNA methyltransferase             | <b>-0.28</b> | 0.48214 |
| STM2649 | trxC    | thioredoxin 2                                    | <b>-0.30</b> | 0.41187 |
| STM2649 | trxC    | thioredoxin 2                                    | <b>0.11</b>  | 0.81323 |
| STM2650 | yfiP    | putative cytoplasmic protein                     | <b>-0.38</b> | 0.33745 |
| STM2650 | yfiP    | putative cytoplasmic protein                     | <b>0.15</b>  | 0.72197 |
| STM2651 | yfiQ    | putative acetyl-CoA synthetase                   | <b>-0.21</b> | 0.61809 |
| STM2651 | yfiQ    | putative acetyl-CoA synthetase                   | <b>0.39</b>  | 0.37585 |
| STM2652 | pssA    | phosphatidylserine synthase                      | <b>0.26</b>  | 0.47736 |
| STM2652 | pssA    | phosphatidylserine synthase                      | <b>0.11</b>  | 0.86370 |
| STM2653 | yfiM    | putative outer membrane lipoprotein              | <b>-0.04</b> | 0.95491 |
| STM2653 | yfiM    | putative outer membrane lipoprotein              | <b>0.02</b>  | 0.97994 |
| STM2654 | kgtP    | alpha-ketoglutarate permease                     | <b>0.34</b>  | 0.39000 |
| STM2654 | kgtP    | alpha-ketoglutarate permease                     | <b>0.09</b>  | 0.83718 |
| STM2655 | STM2655 | putative cytoplasmic protein                     | <b>-0.54</b> | 0.32760 |
| STM2655 | STM2655 | putative cytoplasmic protein                     | <b>0.39</b>  | 0.45833 |
| STM2657 | rrlG    | STM2657                                          | <b>-0.16</b> | 0.80655 |
| STM2657 | rrlG    | STM2657                                          | <b>-0.58</b> | 0.36942 |
| STM2660 | clpB    | ATP-dependent protease                           | <b>-0.27</b> | 0.55355 |
| STM2660 | clpB    | ATP-dependent protease                           | <b>-0.42</b> | 0.35937 |
| STM2661 | yfiH    | putative inner membrane protein                  | <b>-0.54</b> | 0.22602 |
| STM2661 | yfiH    | putative inner membrane protein                  | <b>-0.31</b> | 0.43982 |
| STM2662 | rluD    | ribosomal large subunit pseudouridine synthase D | <b>-0.31</b> | 0.41715 |
| STM2662 | rluD    | ribosomal large subunit pseudouridine synthase D | <b>-0.17</b> | 0.62861 |
| STM2663 | yfiO    | putative lipoprotein                             | <b>-0.63</b> | 0.29689 |
| STM2663 | yfiO    | putative lipoprotein                             | <b>0.11</b>  | 0.86190 |
| STM2665 | yfiA    | ribosome stabilization factor                    | <b>-0.15</b> | 0.75798 |
| STM2665 | yfiA    | ribosome stabilization factor                    | <b>0.64</b>  | 0.28024 |
| STM2667 | pheA    | chorismate mutase P/prephenate dehydratase       | <b>-0.39</b> | 0.35986 |
| STM2667 | pheA    | chorismate mutase P/prephenate dehydratase       | <b>0.00</b>  | 0.99907 |
| STM2668 | STM2668 | putative cytoplasmic protein                     | <b>-0.20</b> | 0.59121 |
| STM2668 | STM2668 | putative cytoplasmic protein                     | <b>0.17</b>  | 0.75851 |
| STM2669 | tyrA    | chorismate mutase T/prephenate dehydrogenase     | <b>-0.30</b> | 0.45498 |
| STM2669 | tyrA    | chorismate mutase T/prephenate dehydrogenase     | <b>0.05</b>  | 0.94475 |
| STM2670 | aroF    | 3-deoxy-7-phosphoheptulonate synthase            | <b>-0.27</b> | 0.53731 |
| STM2670 | aroF    | 3-deoxy-7-phosphoheptulonate synthase            | <b>-0.04</b> | 0.91981 |
| STM2671 | yfiR    | putative periplasmic protein                     | <b>-0.40</b> | 0.35366 |
| STM2671 | yfiR    | putative periplasmic protein                     | <b>0.05</b>  | 0.95049 |

|         |         |                                                |              |         |
|---------|---------|------------------------------------------------|--------------|---------|
| STM2672 | yfiN    | putative diguanylate cyclase/phosphodiesterase | <b>-0.37</b> | 0.49871 |
| STM2672 | yfiN    | putative diguanylate cyclase/phosphodiesterase | <b>0.01</b>  | 0.98643 |
| STM2673 | rplS    | 50S ribosomal protein L19                      | <b>-0.62</b> | 0.31280 |
| STM2673 | rplS    | 50S ribosomal protein L19                      | <b>-0.43</b> | 0.50759 |
| STM2674 | trmD    | tRNA (guanine-N(1)-)-methyltransferase         | <b>-0.57</b> | 0.17139 |
| STM2674 | trmD    | tRNA (guanine-N(1)-)-methyltransferase         | <b>-0.24</b> | 0.54169 |
| STM2675 | rimM    | 16S rRNA-processing protein                    | <b>0.06</b>  | 0.90057 |
| STM2675 | rimM    | 16S rRNA-processing protein                    | <b>0.66</b>  | 0.17754 |
| STM2676 | rpsP    | 30S ribosomal protein S16                      | <b>-0.03</b> | 0.94798 |
| STM2676 | rpsP    | 30S ribosomal protein S16                      | <b>0.37</b>  | 0.32760 |
| STM2677 | ffh     | 4,5S-RNP protein                               | <b>-0.60</b> | 0.19142 |
| STM2677 | ffh     | 4,5S-RNP protein                               | <b>0.05</b>  | 0.91900 |
| STM2678 | corE    | hypothetical protein STM2678                   | <b>-0.08</b> | 0.89849 |
| STM2678 | corE    | hypothetical protein STM2678                   | <b>0.34</b>  | 0.61215 |
| STM2679 | yfjD    | hypothetical protein STM2679                   | <b>-0.43</b> | 0.49336 |
| STM2679 | yfjD    | hypothetical protein STM2679                   | <b>0.22</b>  | 0.63562 |
| STM2680 | STM2680 | putative cytoplasmic protein                   | <b>-0.14</b> | 0.76074 |
| STM2680 | STM2680 | putative cytoplasmic protein                   | <b>-0.36</b> | 0.45423 |
| STM2681 | grpE    | heat shock protein                             | <b>0.11</b>  | 0.79890 |
| STM2681 | grpE    | heat shock protein                             | <b>0.22</b>  | 0.71864 |
| STM2683 | ppnK    | inorganic polyphosphate/ATP-NAD kinase         | <b>-0.23</b> | 0.57799 |
| STM2683 | ppnK    | inorganic polyphosphate/ATP-NAD kinase         | <b>0.10</b>  | 0.83026 |
| STM2684 | recN    | recombination/DNA repair protein               | <b>-0.35</b> | 0.42591 |
| STM2684 | recN    | recombination/DNA repair protein               | <b>0.52</b>  | 0.33587 |
| STM2685 | smpA    | small membrane protein A                       | <b>-0.40</b> | 0.29689 |
| STM2685 | smpA    | small membrane protein A                       | <b>0.01</b>  | 0.98840 |
| STM2686 | yfjF    | hypothetical protein STM2686                   | <b>-0.23</b> | 0.62873 |
| STM2686 | yfjF    | hypothetical protein STM2686                   | <b>0.12</b>  | 0.85698 |
| STM2687 | yfjG    | putative oligoketide cyclase                   | <b>-0.18</b> | 0.64103 |
| STM2687 | yfjG    | putative oligoketide cyclase                   | <b>0.74</b>  | 0.18313 |
| STM2688 | smpB    | SsrA-binding protein                           | <b>-0.35</b> | 0.45664 |
| STM2688 | smpB    | SsrA-binding protein                           | <b>0.00</b>  | 0.99938 |
| STM2690 | STM2690 | putative outer membrane efflux protein         | <b>-0.40</b> | 0.41913 |
| STM2690 | STM2690 | putative outer membrane efflux protein         | <b>0.36</b>  | 0.58506 |
| STM2691 | STM2691 | putative ABC transporter transmembrane region  | <b>-0.34</b> | 0.48567 |
| STM2691 | STM2691 | putative ABC transporter transmembrane region  | <b>0.02</b>  | 0.97219 |
| STM2692 | STM2692 | putative HlyD family secretion protein         | <b>0.17</b>  | 0.75437 |
| STM2692 | STM2692 | putative HlyD family secretion protein         | <b>0.21</b>  | 0.64458 |
| STM2695 | STM2695 | late control-like protein                      | <b>0.31</b>  | 0.55338 |
| STM2695 | STM2695 | late control-like protein                      | <b>0.23</b>  | 0.51526 |
| STM2696 | STM2696 | putative phage tail protein                    | <b>-0.12</b> | 0.85670 |
| STM2696 | STM2696 | putative phage tail protein                    | <b>0.32</b>  | 0.45852 |
| STM2697 | STM2697 | phage tail-like protein                        | <b>-0.18</b> | 0.83109 |
| STM2697 | STM2697 | phage tail-like protein                        | <b>0.44</b>  | 0.35564 |
| STM2698 | STM2698 | gpE-like protein                               | <b>-0.18</b> | 0.79283 |
| STM2698 | STM2698 | gpE-like protein                               | <b>0.83</b>  | 0.22849 |
| STM2699 | STM2699 | putative phage tail-like protein               | <b>-0.29</b> | 0.55833 |
| STM2699 | STM2699 | putative phage tail-like protein               | <b>0.01</b>  | 0.99024 |
| STM2700 | STM2700 | phage tail fiber-like protein                  | <b>-0.77</b> | 0.14395 |
| STM2700 | STM2700 | phage tail fiber-like protein                  | <b>0.17</b>  | 0.73855 |
| STM2701 | STM2701 | phage tail sheath-like protein                 | <b>-0.18</b> | 0.65130 |
| STM2701 | STM2701 | phage tail sheath-like protein                 | <b>0.64</b>  | 0.50474 |
| STM2704 | STM2704 | tail fibre assembly-like protein phage Fels-2] | <b>-1.15</b> | 0.19843 |
| STM2704 | STM2704 | tail fibre assembly-like protein phage Fels-2] | <b>-0.18</b> | 0.83688 |
| STM2705 | STM2705 | hypothetical protein STM2705                   | <b>0.23</b>  | 0.77834 |
| STM2705 | STM2705 | hypothetical protein STM2705                   | <b>0.66</b>  | 0.28861 |
| STM2707 | STM2707 | phage tail-like protein                        | <b>0.03</b>  | 0.95591 |
| STM2707 | STM2707 | phage tail-like protein                        | <b>0.78</b>  | 0.18622 |
| STM2708 | STM2708 | phage tail-like protein                        | <b>0.22</b>  | 0.82667 |
| STM2708 | STM2708 | phage tail-like protein                        | <b>0.41</b>  | 0.55598 |
| STM2709 | STM2709 | base plate tail-like protein                   | <b>-0.63</b> | 0.21984 |
| STM2709 | STM2709 | base plate tail-like protein                   | <b>-0.14</b> | 0.83918 |
| STM2710 | STM2710 | phage baseplate assembly-like protein          | <b>-0.55</b> | 0.26261 |

|            |            |                                          |              |         |
|------------|------------|------------------------------------------|--------------|---------|
| STM2710    | STM2710    | phage baseplate assembly-like protein    | <b>-0.18</b> | 0.84272 |
| STM2711    | STM2711    | phage tail-like protein                  | <b>-0.25</b> | 0.58890 |
| STM2711    | STM2711    | phage tail-like protein                  | <b>0.46</b>  | 0.59820 |
| STM2712    | STM2712    | phage tail-like protein                  | <b>-0.15</b> | 0.80406 |
| STM2712    | STM2712    | phage tail-like protein                  | <b>-0.38</b> | 0.55584 |
| STM2714    | STM2714    | lysis-like protein                       | <b>-0.08</b> | 0.88599 |
| STM2714    | STM2714    | lysis-like protein                       | <b>0.40</b>  | 0.47610 |
| STM2715,S  | STM2715,S  | probable prophage lysozyme               | <b>1.08</b>  | 0.26785 |
| STM2715,S  | STM2715,S  | probable prophage lysozyme               | <b>1.72</b>  | 0.17359 |
| STM2716    | STM2716    | phage-holin-like protein                 | <b>-0.45</b> | 0.27959 |
| STM2716    | STM2716    | phage-holin-like protein                 | <b>0.25</b>  | 0.62861 |
| STM2717    | STM2717    | phage tail-like protein                  | <b>0.10</b>  | 0.92032 |
| STM2717    | STM2717    | phage tail-like protein                  | <b>0.01</b>  | 0.99230 |
| STM2718    | STM2718    | head completion-like protein             | <b>0.80</b>  | 0.55483 |
| STM2718    | STM2718    | head completion-like protein             | <b>1.29</b>  | 0.29796 |
| STM2719    | STM2719    | terminase-like protein                   | <b>-0.87</b> | 0.18426 |
| STM2719    | STM2719    | terminase-like protein                   | <b>0.36</b>  | 0.56860 |
| STM2720    | STM2720    | major capsid-like protein                | <b>-0.16</b> | 0.70229 |
| STM2720    | STM2720    | major capsid-like protein                | <b>1.00</b>  | 0.15955 |
| STM2721    | STM2721    | capsid scaffold-like protein             | <b>-0.37</b> | 0.35986 |
| STM2721    | STM2721    | capsid scaffold-like protein             | <b>0.74</b>  | 0.29796 |
| STM2722    | STM2722    | terminase-like protein phage Fels-2]     | <b>-1.02</b> | 0.16490 |
| STM2722    | STM2722    | terminase-like protein phage Fels-2]     | <b>-0.42</b> | 0.45926 |
| STM2723    | STM2723    | portal vertex-like protein phage Fels-2] | <b>-0.07</b> | 0.93089 |
| STM2723    | STM2723    | portal vertex-like protein phage Fels-2] | <b>0.36</b>  | 0.42409 |
| STM2727    | STM2727    | hypothetical protein STM2727             | <b>-0.07</b> | 0.96785 |
| STM2727    | STM2727    | hypothetical protein STM2727             | <b>1.08</b>  | 0.26201 |
| STM2729    | STM2729    | hypothetical protein STM2729             | <b>0.09</b>  | 0.89407 |
| STM2729    | STM2729    | hypothetical protein STM2729             | <b>0.87</b>  | 0.26213 |
| STM2730    | STM2730    | DNA adenine methylase-like protein       | <b>-0.56</b> | 0.53827 |
| STM2730    | STM2730    | DNA adenine methylase-like protein       | <b>0.55</b>  | 0.61343 |
| STM2732    | STM2732    | hypothetical protein STM2732             | <b>-0.69</b> | 0.19811 |
| STM2732    | STM2732    | hypothetical protein STM2732             | <b>0.67</b>  | 0.26410 |
| STM2733    | STM2733    | hypothetical protein STM2733             | <b>-0.36</b> | 0.53813 |
| STM2733    | STM2733    | hypothetical protein STM2733             | <b>0.19</b>  | 0.79096 |
| STM2735    | STM2735    | hypothetical protein STM2735             | <b>-0.33</b> | 0.48600 |
| STM2735    | STM2735    | hypothetical protein STM2735             | <b>0.23</b>  | 0.76312 |
| STM2736    | STM2736    | hypothetical protein STM2736             | <b>-0.03</b> | 0.95397 |
| STM2736    | STM2736    | hypothetical protein STM2736             | <b>0.66</b>  | 0.13112 |
| STM2737    | STM2737    | hypothetical protein STM2737             | <b>-0.48</b> | 0.26378 |
| STM2737    | STM2737    | hypothetical protein STM2737             | <b>0.04</b>  | 0.95363 |
| STM2739    | STM2739    | phage tail-like protein phage Fels-2]    | <b>-0.47</b> | 0.37888 |
| STM2739    | STM2739    | phage tail-like protein phage Fels-2]    | <b>-0.29</b> | 0.53840 |
| STM2740    | STM2740    | integrase-like protein phage Fels-2]     | <b>-0.17</b> | 0.73473 |
| STM2740    | STM2740    | integrase-like protein phage Fels-2]     | <b>0.49</b>  | 0.29796 |
| STM2740,1N | STM2740,1N | hypothetical protein STM2740,1N          | <b>-0.64</b> | 0.15984 |
| STM2740,1N | STM2740,1N | hypothetical protein STM2740,1N          | <b>0.93</b>  | 0.30113 |
| STM2741    | STM2741    | putative periplasmic protein             | <b>-0.12</b> | 0.84842 |
| STM2741    | STM2741    | putative periplasmic protein             | <b>0.48</b>  | 0.24811 |
| STM2742    | STM2742    | putative cytoplasmic protein             | <b>-0.09</b> | 0.82384 |
| STM2742    | STM2742    | putative cytoplasmic protein             | <b>0.53</b>  | 0.22540 |
| STM2743    | STM2743    | putative cytoplasmic protein             | <b>-0.09</b> | 0.89487 |
| STM2743    | STM2743    | putative cytoplasmic protein             | <b>-0.18</b> | 0.77536 |
| STM2744    | STM2744    | putative cytoplasmic protein             | <b>0.04</b>  | 0.93582 |
| STM2744    | STM2744    | putative cytoplasmic protein             | <b>0.36</b>  | 0.51979 |
| STM2745    | STM2745    | putative inner membrane protein          | <b>0.11</b>  | 0.81293 |
| STM2745    | STM2745    | putative inner membrane protein          | <b>0.02</b>  | 0.96736 |
| STM2746    | STM2746    | putative ATPase                          | <b>0.21</b>  | 0.68232 |
| STM2746    | STM2746    | putative ATPase                          | <b>0.22</b>  | 0.72056 |
| STM2747    | STM2747    | putative cytoplasmic protein             | <b>-0.12</b> | 0.77923 |
| STM2747    | STM2747    | putative cytoplasmic protein             | <b>-0.34</b> | 0.65451 |
| STM2748    | STM2748    | putative transcriptional regulator       | <b>-0.27</b> | 0.47736 |
| STM2748    | STM2748    | putative transcriptional regulator       | <b>0.05</b>  | 0.93485 |

|         |         |                                                                  |              |         |
|---------|---------|------------------------------------------------------------------|--------------|---------|
| STM2749 | STM2749 | putative cytoplasmic protein                                     | <b>-0.38</b> | 0.58182 |
| STM2749 | STM2749 | putative cytoplasmic protein                                     | <b>0.59</b>  | 0.26910 |
| STM2750 | STM2750 | putative PTS system glucitol/sorbitol-specific enzyme II         | <b>-0.56</b> | 0.21393 |
| STM2750 | STM2750 | putative PTS system glucitol/sorbitol-specific enzyme II         | <b>0.11</b>  | 0.86629 |
| STM2751 | STM2751 | putative glucitol-specific PTS enzyme III                        | <b>0.66</b>  | 0.32481 |
| STM2751 | STM2751 | putative glucitol-specific PTS enzyme III                        | <b>1.45</b>  | 0.15479 |
| STM2752 | STM2752 | putative glucitol-specific PTS enzyme III                        | <b>0.49</b>  | 0.34936 |
| STM2752 | STM2752 | putative glucitol-specific PTS enzyme III                        | <b>0.33</b>  | 0.42494 |
| STM2753 | STM2753 | putative dehydrogenase                                           | <b>-0.06</b> | 0.91378 |
| STM2753 | STM2753 | putative dehydrogenase                                           | <b>0.72</b>  | 0.11913 |
| STM2754 | STM2754 | putative hexulose 6 phosphate synthase                           | <b>-0.05</b> | 0.93506 |
| STM2754 | STM2754 | putative hexulose 6 phosphate synthase                           | <b>0.55</b>  | 0.25759 |
| STM2755 | STM2755 | putative hexulose 6 phosphate synthase                           | <b>0.15</b>  | 0.84687 |
| STM2755 | STM2755 | putative hexulose 6 phosphate synthase                           | <b>0.59</b>  | 0.50825 |
| STM2756 | STM2756 | putative sugar phosphate aminotransferase                        | <b>0.28</b>  | 0.68969 |
| STM2756 | STM2756 | putative sugar phosphate aminotransferase                        | <b>0.69</b>  | 0.26714 |
| STM2757 | STM2757 | putative cytoplasmic protein                                     | <b>-0.61</b> | 0.24818 |
| STM2757 | STM2757 | putative cytoplasmic protein                                     | <b>0.22</b>  | 0.69578 |
| STM2758 | STM2758 | putative phosphotransferase system IIC component                 | <b>0.12</b>  | 0.85718 |
| STM2758 | STM2758 | putative phosphotransferase system IIC component                 | <b>-0.12</b> | 0.81284 |
| STM2759 | STM2759 | putative dipeptide/oligopeptide/nickel ABC-type transport system | <b>0.00</b>  | 0.99806 |
| STM2759 | STM2759 | putative dipeptide/oligopeptide/nickel ABC-type transport system | <b>-0.07</b> | 0.97612 |
| STM2760 | STM2760 | putative integrase                                               | <b>-0.51</b> | 0.37535 |
| STM2760 | STM2760 | putative integrase                                               | <b>0.25</b>  | 0.72936 |
| STM2761 | STM2761 | putative inner membrane protein                                  | <b>-0.62</b> | 0.34102 |
| STM2761 | STM2761 | putative inner membrane protein                                  | <b>0.03</b>  | 0.96850 |
| STM2762 | STM2762 | putative inner membrane protein                                  | <b>-0.36</b> | 0.55008 |
| STM2762 | STM2762 | putative inner membrane protein                                  | <b>-0.11</b> | 0.82667 |
| STM2765 | STM2765 | putative transposase                                             | <b>-0.99</b> | 0.13813 |
| STM2765 | STM2765 | putative transposase                                             | <b>0.16</b>  | 0.86296 |
| STM2767 | STM2767 | putative DNA/RNA helicase                                        | <b>0.07</b>  | 0.85774 |
| STM2767 | STM2767 | putative DNA/RNA helicase                                        | <b>-0.06</b> | 0.87826 |
| STM2768 | STM2768 | putative transposase                                             | <b>-0.46</b> | 0.30644 |
| STM2768 | STM2768 | putative transposase                                             | <b>0.68</b>  | 0.20021 |
| STM2769 | STM2769 | putative transposase                                             | <b>-0.12</b> | 0.76225 |
| STM2769 | STM2769 | putative transposase                                             | <b>0.53</b>  | 0.36654 |
| STM2770 | fljA    | phase-1 flagellin repressor                                      | <b>0.03</b>  | 0.96785 |
| STM2770 | fljA    | phase-1 flagellin repressor                                      | <b>-0.05</b> | 0.91874 |
| STM2771 | fljB    | flagellar biosynthesis protein                                   | <b>-0.28</b> | 0.46488 |
| STM2771 | fljB    | flagellar biosynthesis protein                                   | <b>0.27</b>  | 0.55167 |
| STM2772 | hin     | DNA-invertase Hin                                                | <b>-0.47</b> | 0.31458 |
| STM2772 | hin     | DNA-invertase Hin                                                | <b>0.04</b>  | 0.94368 |
| STM2773 | iroB    | putative glycosyl transferase                                    | <b>-0.31</b> | 0.64719 |
| STM2773 | iroB    | putative glycosyl transferase                                    | <b>0.06</b>  | 0.93699 |
| STM2774 | iroC    | putative ABC transporter protein                                 | <b>-0.10</b> | 0.84913 |
| STM2774 | iroC    | putative ABC transporter protein                                 | <b>0.97</b>  | 0.14030 |
| STM2775 | iroD    | enterochelin esterase=-like protein                              | <b>-0.09</b> | 0.87154 |
| STM2775 | iroD    | enterochelin esterase=-like protein                              | <b>0.42</b>  | 0.36856 |
| STM2776 | iroE    | putative hydrolase                                               | <b>-0.32</b> | 0.68136 |
| STM2776 | iroE    | putative hydrolase                                               | <b>0.42</b>  | 0.39861 |
| STM2777 | iroN    | TonB-dependent siderophore receptor protein                      | <b>0.44</b>  | 0.60679 |
| STM2777 | iroN    | TonB-dependent siderophore receptor protein                      | <b>1.33</b>  | 0.21138 |
| STM2780 | pipB2   | secreted effector protein                                        | <b>-0.46</b> | 0.45732 |
| STM2780 | pipB2   | secreted effector protein                                        | <b>0.17</b>  | 0.74626 |
| STM2781 | virK    | virulence protein                                                | <b>-1.65</b> | 0.02425 |
| STM2781 | virK    | virulence protein                                                | <b>-1.04</b> | 0.08322 |
| STM2782 | mig-14  | putative transcriptional activator                               | <b>-1.87</b> | 0.08174 |
| STM2782 | mig-14  | putative transcriptional activator                               | <b>-0.26</b> | 0.76008 |
| STM2783 | nixA    | putative nickel transporter                                      | <b>0.00</b>  | 0.99726 |
| STM2783 | nixA    | putative nickel transporter                                      | <b>-0.06</b> | 0.94050 |
| STM2784 | tctE    | regulatory protein                                               | <b>0.05</b>  | 0.94675 |

|         |         |                                                    |              |         |
|---------|---------|----------------------------------------------------|--------------|---------|
| STM2784 | tctE    | regulatory protein                                 | <b>0.14</b>  | 0.72146 |
| STM2785 | tctD    | regulatory protein                                 | <b>0.42</b>  | 0.33971 |
| STM2785 | tctD    | regulatory protein                                 | <b>1.14</b>  | 0.11913 |
| STM2786 | STM2786 | tricarboxylic transport                            | <b>-0.33</b> | 0.61285 |
| STM2786 | STM2786 | tricarboxylic transport                            | <b>-0.13</b> | 0.74224 |
| STM2787 | STM2787 | tricarboxylic transport                            | <b>-0.26</b> | 0.54436 |
| STM2787 | STM2787 | tricarboxylic transport                            | <b>0.16</b>  | 0.72521 |
| STM2788 | STM2788 | tricarboxylic transport                            | <b>0.16</b>  | 0.79278 |
| STM2788 | STM2788 | tricarboxylic transport                            | <b>0.14</b>  | 0.72219 |
| STM2789 | STM2789 | hypothetical protein STM2789                       | <b>0.03</b>  | 0.96001 |
| STM2789 | STM2789 | hypothetical protein STM2789                       | <b>0.21</b>  | 0.65305 |
| STM2790 | ygaF    | putative sarcosine oxidase-like protein            | <b>-0.32</b> | 0.73940 |
| STM2790 | ygaF    | putative sarcosine oxidase-like protein            | <b>-1.75</b> | 0.60942 |
| STM2791 | gabD    | succinate-semialdehyde dehydrogenase I             | <b>-0.35</b> | 0.50764 |
| STM2791 | gabD    | succinate-semialdehyde dehydrogenase I             | <b>0.43</b>  | 0.29044 |
| STM2792 | gabT    | 4-aminobutyrate aminotransferase                   | <b>0.34</b>  | 0.61960 |
| STM2792 | gabT    | 4-aminobutyrate aminotransferase                   | <b>-0.41</b> | 0.45800 |
| STM2793 | gabP    | gamma-aminobutyrate transport protein              | <b>-0.93</b> | 0.19236 |
| STM2793 | gabP    | gamma-aminobutyrate transport protein              | <b>0.03</b>  | 0.97333 |
| STM2794 | ygaE    | putative transcriptional repressor                 | <b>-0.26</b> | 0.52362 |
| STM2794 | ygaE    | putative transcriptional repressor                 | <b>0.08</b>  | 0.91170 |
| STM2795 | ygaU    | hypothetical protein STM2795                       | <b>-0.16</b> | 0.88018 |
| STM2795 | ygaU    | hypothetical protein STM2795                       | <b>0.31</b>  | 0.57441 |
| STM2796 | yqaE    | putative transport protein                         | <b>0.49</b>  | 0.24005 |
| STM2796 | yqaE    | putative transport protein                         | <b>0.31</b>  | 0.58903 |
| STM2797 | STM2797 | putative regulatory protein                        | <b>-0.37</b> | 0.34070 |
| STM2797 | STM2797 | putative regulatory protein                        | <b>0.48</b>  | 0.29912 |
| STM2798 | ygaP    | putative rhodanese-like sulfurtransferase          | <b>0.13</b>  | 0.74231 |
| STM2798 | ygaP    | putative rhodanese-like sulfurtransferase          | <b>0.18</b>  | 0.61735 |
| STM2799 | stpA    | DNA-binding protein                                | <b>-0.60</b> | 0.43439 |
| STM2799 | stpA    | DNA-binding protein                                | <b>-0.88</b> | 0.25720 |
| STM2800 | STM2800 | putative inner membrane protein                    | <b>-0.48</b> | 0.34936 |
| STM2800 | STM2800 | putative inner membrane protein                    | <b>-0.37</b> | 0.48432 |
| STM2801 | ygaC    | putative cytoplasmic protein                       | <b>-0.81</b> | 0.13206 |
| STM2801 | ygaC    | putative cytoplasmic protein                       | <b>-0.19</b> | 0.68032 |
| STM2802 | ygaM    | putative inner membrane protein                    | <b>0.12</b>  | 0.83045 |
| STM2802 | ygaM    | putative inner membrane protein                    | <b>0.32</b>  | 0.53138 |
| STM2803 | STM2803 | putative regulatory protein                        | <b>0.03</b>  | 0.96966 |
| STM2803 | STM2803 | putative regulatory protein                        | <b>0.20</b>  | 0.65436 |
| STM2804 | STM2804 | putative cytoplasmic protein                       | <b>0.00</b>  | 0.99929 |
| STM2804 | STM2804 | putative cytoplasmic protein                       | <b>0.81</b>  | 0.19967 |
| STM2805 | nrdH    | glutaredoxin-like protein                          | <b>-0.02</b> | 0.98140 |
| STM2805 | nrdH    | glutaredoxin-like protein                          | <b>0.25</b>  | 0.51813 |
| STM2806 | nrdI    | hypothetical protein STM2806                       | <b>-0.04</b> | 0.93639 |
| STM2806 | nrdI    | hypothetical protein STM2806                       | <b>0.97</b>  | 0.11681 |
| STM2807 | nrdE    | ribonucleotide-diphosphate reductase alpha subunit | <b>0.35</b>  | 0.57132 |
| STM2807 | nrdE    | ribonucleotide-diphosphate reductase alpha subunit | <b>0.74</b>  | 0.31280 |
| STM2808 | nrdF    | ribonucleotide-diphosphate reductase beta subunit  | <b>-0.15</b> | 0.72538 |
| STM2808 | nrdF    | ribonucleotide-diphosphate reductase beta subunit  | <b>0.65</b>  | 0.46854 |
| STM2809 | proV    | glycine/betaine/proline transport protein          | <b>0.46</b>  | 0.46101 |
| STM2809 | proV    | glycine/betaine/proline transport protein          | <b>0.04</b>  | 0.93582 |
| STM2810 | proW    | glycine/betaine/proline transport protein          | <b>0.24</b>  | 0.54624 |
| STM2810 | proW    | glycine/betaine/proline transport protein          | <b>0.23</b>  | 0.54599 |
| STM2811 | proX    | glycine/betaine/proline transport protein          | <b>-0.08</b> | 0.86702 |
| STM2811 | proX    | glycine/betaine/proline transport protein          | <b>0.65</b>  | 0.13128 |
| STM2812 | STM2812 | putative inner membrane protein                    | <b>-0.19</b> | 0.61345 |
| STM2812 | STM2812 | putative inner membrane protein                    | <b>0.03</b>  | 0.95683 |
| STM2813 | emrR    | emrAB operon transcriptional repressor             | <b>-0.15</b> | 0.74231 |
| STM2813 | emrR    | emrAB operon transcriptional repressor             | <b>-0.04</b> | 0.94087 |
| STM2814 | emrA    | multidrug resistance secretion protein             | <b>-0.24</b> | 0.54307 |
| STM2814 | emrA    | multidrug resistance secretion protein             | <b>-0.07</b> | 0.88998 |
| STM2815 | emrB    | putative multidrug transport protein               | <b>0.50</b>  | 0.68313 |
| STM2815 | emrB    | putative multidrug transport protein               | <b>-0.23</b> | 0.65549 |

|           |         |                                                          |              |         |
|-----------|---------|----------------------------------------------------------|--------------|---------|
| STM2816   | STM2816 | putative glycoporin                                      | <b>-0.08</b> | 0.89542 |
| STM2816   | STM2816 | putative glycoporin                                      | <b>0.16</b>  | 0.76026 |
| STM2817   | luxS    | S-ribosylhomocysteinase                                  | <b>-0.87</b> | 0.25195 |
| STM2817   | luxS    | S-ribosylhomocysteinase                                  | <b>-0.61</b> | 0.40227 |
| STM2818   | gshA    | glutamate--cysteine ligase                               | <b>-0.15</b> | 0.66938 |
| STM2818   | gshA    | glutamate--cysteine ligase                               | <b>-0.17</b> | 0.71693 |
| STM2819   | yqaA    | putative inner membrane protein                          | <b>0.00</b>  | 0.99518 |
| STM2819   | yqaA    | putative inner membrane protein                          | <b>0.13</b>  | 0.81763 |
| STM2820   | yqaB    | putative phosphoglucomutase                              | <b>-0.75</b> | 0.32984 |
| STM2820   | yqaB    | putative phosphoglucomutase                              | <b>-0.30</b> | 0.56564 |
| STM2824   | -       | STM2824                                                  | <b>-0.50</b> | 0.25473 |
| STM2824   | -       | STM2824                                                  | <b>-0.56</b> | 0.19843 |
| STM2824   | -       | STM2824                                                  | <b>-0.37</b> | 0.33452 |
| STM2824   | -       | STM2824                                                  | <b>-0.24</b> | 0.54389 |
| STM2824   | -       | STM2824                                                  | <b>-0.20</b> | 0.70137 |
| STM2824   | -       | STM2824                                                  | <b>-0.45</b> | 0.40636 |
| STM2824   | -       | STM2824                                                  | <b>-0.22</b> | 0.61960 |
| STM2824   | -       | STM2824                                                  | <b>0.00</b>  | 0.99381 |
| STM2825   | -       | STM2825                                                  | <b>-0.10</b> | 0.87917 |
| STM2825   | -       | STM2825                                                  | <b>0.03</b>  | 0.96687 |
| STM2826   | csrA    | carbon storage regulator                                 | <b>-0.11</b> | 0.79283 |
| STM2826   | csrA    | carbon storage regulator                                 | <b>-0.06</b> | 0.91378 |
| STM2827   | alaS    | alanyl-tRNA synthetase                                   | <b>-0.55</b> | 0.21393 |
| STM2827   | alaS    | alanyl-tRNA synthetase                                   | <b>0.28</b>  | 0.58071 |
| STM2828   | recX    | RecA regulator RecX                                      | <b>-0.31</b> | 0.42525 |
| STM2828   | recX    | RecA regulator RecX                                      | <b>-0.21</b> | 0.69921 |
| STM2829   | recA    | recombinase A                                            | <b>-0.38</b> | 0.41154 |
| STM2829   | recA    | recombinase A                                            | <b>0.11</b>  | 0.85314 |
| STM2830   | ygaD    | competence damage-inducible protein A                    | <b>-0.09</b> | 0.84911 |
| STM2830   | ygaD    | competence damage-inducible protein A                    | <b>0.02</b>  | 0.96851 |
| STM2831   | mltB    | membrane-bound lytic murein transglycosylase B           | <b>-0.08</b> | 0.84930 |
| STM2831   | mltB    | membrane-bound lytic murein transglycosylase B           | <b>-0.14</b> | 0.79635 |
| STM2832   | srlA    | glucitol/sorbitol-specific enzyme IIC component          | <b>0.27</b>  | 0.52101 |
| STM2832   | srlA    | glucitol/sorbitol-specific enzyme IIC component          | <b>0.31</b>  | 0.53827 |
| STM2833   | srlE    | glucitol/sorbitol-specific enzyme IIB component          | <b>0.21</b>  | 0.63154 |
| STM2833   | srlE    | glucitol/sorbitol-specific enzyme IIB component          | <b>0.64</b>  | 0.20065 |
| STM2834   | slrB    | glucitol/sorbitol-specific enzyme IIA component          | <b>0.09</b>  | 0.87016 |
| STM2834   | slrB    | glucitol/sorbitol-specific enzyme IIA component          | <b>0.20</b>  | 0.67233 |
| STM2835   | srlD    | sorbitol-6-phosphate 2-dehydrogenase                     | <b>0.14</b>  | 0.85382 |
| STM2835   | srlD    | sorbitol-6-phosphate 2-dehydrogenase                     | <b>0.25</b>  | 0.71249 |
| STM2836   | gutM    | putative glucitol operon regulatory protein              | <b>-0.35</b> | 0.36399 |
| STM2836   | gutM    | putative glucitol operon regulatory protein              | <b>0.30</b>  | 0.48994 |
| STM2837   | srlR    | transcriptional repressor for glucitol operon            | <b>-0.31</b> | 0.48386 |
| STM2837   | srlR    | transcriptional repressor for glucitol operon            | <b>0.55</b>  | 0.29336 |
| STM2838,S | gutQ    | putative sugar phosphate isomerase                       | <b>-0.72</b> | 0.12727 |
| STM2838,S | gutQ    | putative sugar phosphate isomerase                       | <b>-0.20</b> | 0.70549 |
| STM2839   | ygaA    | anaerobic nitric oxide reductase transcription regulator | <b>0.22</b>  | 0.65984 |
| STM2839   | ygaA    | anaerobic nitric oxide reductase transcription regulator | <b>0.42</b>  | 0.38126 |
| STM2840   | STM2840 | anaerobic nitric oxide reductase flavorubredoxin         | <b>-0.50</b> | 0.31139 |
| STM2840   | STM2840 | anaerobic nitric oxide reductase flavorubredoxin         | <b>-0.17</b> | 0.78335 |
| STM2841   | ygbD    | nitric oxide reductase                                   | <b>-0.43</b> | 0.32770 |
| STM2841   | ygbD    | nitric oxide reductase                                   | <b>-0.09</b> | 0.86385 |
| STM2842   | hypF    | hydrogenase maturation protein                           | <b>0.46</b>  | 0.45240 |
| STM2842   | hypF    | hydrogenase maturation protein                           | <b>0.67</b>  | 0.36399 |
| STM2843   | hydN    | electron transport protein                               | <b>-0.16</b> | 0.70848 |
| STM2843   | hydN    | electron transport protein                               | <b>0.00</b>  | 0.99434 |
| STM2844   | STM2844 | hypothetical protein STM2844                             | <b>-0.01</b> | 0.98704 |
| STM2844   | STM2844 | hypothetical protein STM2844                             | <b>-0.09</b> | 0.84021 |
| STM2845   | hycl    | hydrogenase 3 large subunit C-terminal protease          | <b>0.03</b>  | 0.96673 |
| STM2845   | hycl    | hydrogenase 3 large subunit C-terminal protease          | <b>0.08</b>  | 0.89924 |
| STM2846   | hych    | hydrogenase 3 large subunit processing protein           | <b>-0.68</b> | 0.13645 |
| STM2846   | hych    | hydrogenase 3 large subunit processing protein           | <b>0.12</b>  | 0.81763 |
| STM2847   | hycG    | hydrogenase                                              | <b>-0.05</b> | 0.94570 |

|         |      |                                                        |              |         |
|---------|------|--------------------------------------------------------|--------------|---------|
| STM2847 | hycG | hydrogenase                                            | <b>0.09</b>  | 0.86876 |
| STM2848 | hycF | hydrogenase 4 Fe-S subunit                             | <b>0.29</b>  | 0.41584 |
| STM2848 | hycF | hydrogenase 4 Fe-S subunit                             | <b>0.85</b>  | 0.19091 |
| STM2849 | hycE | hydrogenase 3 large subunit                            | <b>-0.27</b> | 0.56786 |
| STM2849 | hycE | hydrogenase 3 large subunit                            | <b>0.07</b>  | 0.92021 |
| STM2850 | hycD | hydrogenase 3 membrane subunit                         | <b>-0.07</b> | 0.89487 |
| STM2850 | hycD | hydrogenase 3 membrane subunit                         | <b>0.40</b>  | 0.62433 |
| STM2851 | hycC | NADH dehydrogenase subunit N                           | <b>0.16</b>  | 0.69882 |
| STM2851 | hycC | NADH dehydrogenase subunit N                           | <b>0.78</b>  | 0.16281 |
| STM2852 | hycB | hydrogenase-3 iron-sulfur subunit                      | <b>0.13</b>  | 0.82595 |
| STM2852 | hycB | hydrogenase-3 iron-sulfur subunit                      | <b>0.19</b>  | 0.69882 |
| STM2853 | hycA | transcriptional repressor                              | <b>-0.90</b> | 0.15859 |
| STM2853 | hycA | transcriptional repressor                              | <b>-0.36</b> | 0.41990 |
| STM2854 | hypA | hydrogenase nickel incorporation protein               | <b>0.02</b>  | 0.96850 |
| STM2854 | hypA | hydrogenase nickel incorporation protein               | <b>0.80</b>  | 0.14030 |
| STM2855 | hypB | hydrogenase-3 accessory protein                        | <b>0.12</b>  | 0.82956 |
| STM2855 | hypB | hydrogenase-3 accessory protein                        | <b>0.31</b>  | 0.49645 |
| STM2856 | hypC | putative hydrogenase formation protein                 | <b>0.01</b>  | 0.98592 |
| STM2856 | hypC | putative hydrogenase formation protein                 | <b>0.33</b>  | 0.42940 |
| STM2857 | hypD | putative hydrogenase formation protein                 | <b>0.04</b>  | 0.95498 |
| STM2857 | hypD | putative hydrogenase formation protein                 | <b>-0.03</b> | 0.95532 |
| STM2858 | hypE | putative hydrogenase formation protein                 | <b>0.07</b>  | 0.90462 |
| STM2858 | hypE | putative hydrogenase formation protein                 | <b>0.03</b>  | 0.94649 |
| STM2859 | fhIA | formate hydrogen-lyase transcriptional activator       | <b>-0.24</b> | 0.68062 |
| STM2859 | fhIA | formate hydrogen-lyase transcriptional activator       | <b>0.55</b>  | 0.33095 |
| STM2860 | ygbA | putative cytoplasmic protein                           | <b>0.20</b>  | 0.68923 |
| STM2860 | ygbA | putative cytoplasmic protein                           | <b>0.71</b>  | 0.21360 |
| STM2861 | sitA | putative periplasmic binding protein                   | <b>0.26</b>  | 0.60552 |
| STM2861 | sitA | putative periplasmic binding protein                   | <b>1.14</b>  | 0.08274 |
| STM2862 | sitB | putative ATP-binding protein                           | <b>0.54</b>  | 0.23495 |
| STM2862 | sitB | putative ATP-binding protein                           | <b>0.69</b>  | 0.16534 |
| STM2863 | sitC | putative permease                                      | <b>-0.03</b> | 0.95809 |
| STM2863 | sitC | putative permease                                      | <b>0.65</b>  | 0.30813 |
| STM2864 | sitD | putative permease                                      | <b>-0.14</b> | 0.73270 |
| STM2864 | sitD | putative permease                                      | <b>0.61</b>  | 0.35366 |
| STM2865 | avrA | secreted effector protein                              | <b>0.34</b>  | 0.46772 |
| STM2865 | avrA | secreted effector protein                              | <b>0.93</b>  | 0.25199 |
| STM2866 | sprB | transcriptional regulator                              | <b>0.16</b>  | 0.73448 |
| STM2866 | sprB | transcriptional regulator                              | <b>0.49</b>  | 0.35824 |
| STM2867 | hilC | invasion regulatory protein                            | <b>0.34</b>  | 0.41715 |
| STM2867 | hilC | invasion regulatory protein                            | <b>0.42</b>  | 0.35824 |
| STM2868 | orgC | putative cytoplasmic protein                           | <b>-0.52</b> | 0.26261 |
| STM2868 | orgC | putative cytoplasmic protein                           | <b>-0.27</b> | 0.56103 |
| STM2869 | orgB | needle complex export protein                          | <b>-0.95</b> | 0.14001 |
| STM2869 | orgB | needle complex export protein                          | <b>-0.76</b> | 0.13206 |
| STM2870 | orgA | needle complex assembly protein                        | <b>0.22</b>  | 0.58071 |
| STM2870 | orgA | needle complex assembly protein                        | <b>0.09</b>  | 0.83443 |
| STM2871 | prgK | needle complex inner membrane lipoprotein              | <b>0.33</b>  | 0.41158 |
| STM2871 | prgK | needle complex inner membrane lipoprotein              | <b>0.73</b>  | 0.24811 |
| STM2872 | prgJ | needle complex minor subunit                           | <b>0.37</b>  | 0.33452 |
| STM2872 | prgJ | needle complex minor subunit                           | <b>0.81</b>  | 0.13645 |
| STM2873 | prgI | needle complex major subunit                           | <b>0.31</b>  | 0.42354 |
| STM2873 | prgI | needle complex major subunit                           | <b>0.98</b>  | 0.11224 |
| STM2874 | prgH | needle complex inner membrane protein                  | <b>0.60</b>  | 0.36311 |
| STM2874 | prgH | needle complex inner membrane protein                  | <b>1.78</b>  | 0.08983 |
| STM2875 | hilD | invasion protein regulatory protein                    | <b>0.41</b>  | 0.34553 |
| STM2875 | hilD | invasion protein regulatory protein                    | <b>0.39</b>  | 0.35908 |
| STM2876 | hilA | invasion protein transcriptional activator             | <b>0.02</b>  | 0.98309 |
| STM2876 | hilA | invasion protein transcriptional activator             | <b>0.94</b>  | 0.15984 |
| STM2877 | iagB | invasion protein precursor                             | <b>-0.26</b> | 0.52663 |
| STM2877 | iagB | invasion protein precursor                             | <b>0.36</b>  | 0.34756 |
| STM2878 | sptP | protein tyrosine phosphatase/GTPase activating protein | <b>-0.01</b> | 0.99310 |
| STM2878 | sptP | protein tyrosine phosphatase/GTPase activating protein | <b>0.43</b>  | 0.48736 |

|         |         |                                                     |              |         |
|---------|---------|-----------------------------------------------------|--------------|---------|
| STM2879 | sicP    | secretion chaperone                                 | <b>0.41</b>  | 0.34789 |
| STM2879 | sicP    | secretion chaperone                                 | <b>0.39</b>  | 0.26971 |
| STM2881 | iacP    | acyl carrier protein                                | <b>0.36</b>  | 0.40500 |
| STM2881 | iacP    | acyl carrier protein                                | <b>0.26</b>  | 0.44280 |
| STM2882 | sipA    | secreted effector protein                           | <b>0.27</b>  | 0.54600 |
| STM2882 | sipA    | secreted effector protein                           | <b>0.68</b>  | 0.15859 |
| STM2883 | sipD    | translocation machinery component                   | <b>0.40</b>  | 0.48814 |
| STM2883 | sipD    | translocation machinery component                   | <b>1.00</b>  | 0.15859 |
| STM2884 | sipC    | translocation machinery component                   | <b>0.66</b>  | 0.25084 |
| STM2884 | sipC    | translocation machinery component                   | <b>0.46</b>  | 0.40126 |
| STM2885 | sipB    | translocation machinery component                   | <b>1.08</b>  | 0.06780 |
| STM2885 | sipB    | translocation machinery component                   | <b>1.46</b>  | 0.11224 |
| STM2886 | sicA    | secretion chaperone                                 | <b>0.43</b>  | 0.27764 |
| STM2886 | sicA    | secretion chaperone                                 | <b>1.12</b>  | 0.17041 |
| STM2887 | spaS    | type III secretion protein                          | <b>-0.14</b> | 0.85893 |
| STM2887 | spaS    | type III secretion protein                          | <b>0.61</b>  | 0.19142 |
| STM2888 | spaR    | needle complex export protein                       | <b>0.25</b>  | 0.65916 |
| STM2888 | spaR    | needle complex export protein                       | <b>-0.28</b> | 0.63546 |
| STM2889 | spaQ    | needle complex export protein                       | <b>-0.15</b> | 0.75244 |
| STM2889 | spaQ    | needle complex export protein                       | <b>0.12</b>  | 0.82956 |
| STM2890 | spaP    | needle complex export protein                       | <b>0.22</b>  | 0.58178 |
| STM2890 | spaP    | needle complex export protein                       | <b>0.26</b>  | 0.58207 |
| STM2891 | spaO    | type III secretion protein                          | <b>0.31</b>  | 0.42455 |
| STM2891 | spaO    | type III secretion protein                          | <b>0.68</b>  | 0.17765 |
| STM2892 | invJ    | needle length control protein                       | <b>0.04</b>  | 0.95532 |
| STM2892 | invJ    | needle length control protein                       | <b>0.99</b>  | 0.22994 |
| STM2893 | invI    | needle complex assembly protein                     | <b>0.61</b>  | 0.18961 |
| STM2893 | invI    | needle complex assembly protein                     | <b>1.64</b>  | 0.08015 |
| STM2894 | invC    | type III secretion system ATPase                    | <b>0.85</b>  | 0.24313 |
| STM2894 | invC    | type III secretion system ATPase                    | <b>0.92</b>  | 0.14374 |
| STM2895 | invB    | secretion chaperone                                 | <b>0.44</b>  | 0.27959 |
| STM2895 | invB    | secretion chaperone                                 | <b>0.66</b>  | 0.26910 |
| STM2896 | invA    | needle complex export protein                       | <b>0.36</b>  | 0.40190 |
| STM2896 | invA    | needle complex export protein                       | <b>0.76</b>  | 0.17754 |
| STM2897 | invE    | invasion protein                                    | <b>0.32</b>  | 0.37634 |
| STM2897 | invE    | invasion protein                                    | <b>0.55</b>  | 0.25454 |
| STM2898 | invG    | outer membrane secretin precursor                   | <b>-0.13</b> | 0.80614 |
| STM2898 | invG    | outer membrane secretin precursor                   | <b>0.65</b>  | 0.37919 |
| STM2899 | invF    | invasion regulatory protein                         | <b>0.18</b>  | 0.76319 |
| STM2899 | invF    | invasion regulatory protein                         | <b>0.40</b>  | 0.30422 |
| STM2900 | invH    | needle complex outer membrane lipoprotein precursor | <b>0.49</b>  | 0.24721 |
| STM2900 | invH    | needle complex outer membrane lipoprotein precursor | <b>0.56</b>  | 0.22088 |
| STM2902 | STM2902 | putative cytoplasmic protein                        | <b>-0.51</b> | 0.34070 |
| STM2902 | STM2902 | putative cytoplasmic protein                        | <b>0.17</b>  | 0.66112 |
| STM2903 | STM2903 | putative cytoplasmic protein                        | <b>-0.63</b> | 0.16534 |
| STM2903 | STM2903 | putative cytoplasmic protein                        | <b>-0.24</b> | 0.54996 |
| STM2904 | STM2904 | putative ABC-type transporter                       | <b>-0.18</b> | 0.70144 |
| STM2904 | STM2904 | putative ABC-type transporter                       | <b>-0.25</b> | 0.63154 |
| STM2905 | STM2905 | putative acetyltransferase                          | <b>0.02</b>  | 0.96785 |
| STM2905 | STM2905 | putative acetyltransferase                          | <b>0.00</b>  | 0.99447 |
| STM2907 | pphB    | serine/threonine protein phosphatase 2              | <b>0.09</b>  | 0.82350 |
| STM2907 | pphB    | serine/threonine protein phosphatase 2              | <b>-0.31</b> | 0.57469 |
| STM2909 | mutS    | DNA mismatch repair protein                         | <b>-0.65</b> | 0.21062 |
| STM2909 | mutS    | DNA mismatch repair protein                         | <b>0.15</b>  | 0.78846 |
| STM2910 | STM2910 | putative cytoplasmic protein                        | <b>-0.47</b> | 0.29789 |
| STM2910 | STM2910 | putative cytoplasmic protein                        | <b>0.16</b>  | 0.74238 |
| STM2911 | STM2911 | putative permease                                   | <b>0.25</b>  | 0.68047 |
| STM2911 | STM2911 | putative permease                                   | <b>-0.13</b> | 0.73855 |
| STM2912 | STM2912 | putative transcriptional regulator                  | <b>0.38</b>  | 0.42525 |
| STM2912 | STM2912 | putative transcriptional regulator                  | <b>0.78</b>  | 0.27312 |
| STM2913 | STM2913 | putative permease                                   | <b>0.03</b>  | 0.95747 |
| STM2913 | STM2913 | putative permease                                   | <b>0.34</b>  | 0.61359 |
| STM2914 | STM2914 | putative nucleoside-diphosphate-sugar epimerase     | <b>0.25</b>  | 0.64422 |

|         |         |                                                        |              |         |
|---------|---------|--------------------------------------------------------|--------------|---------|
| STM2914 | STM2914 | putative nucleoside-diphosphate-sugar epimerase        | <b>1.04</b>  | 0.24908 |
| STM2915 | ygbM    | putative endonuclease                                  | <b>-0.31</b> | 0.74483 |
| STM2915 | ygbM    | putative endonuclease                                  | <b>0.39</b>  | 0.36444 |
| STM2916 | ygbL    | hypothetical protein STM2916                           | <b>0.19</b>  | 0.76319 |
| STM2916 | ygbL    | hypothetical protein STM2916                           | <b>0.22</b>  | 0.60101 |
| STM2917 | ygbK    | putative tRNA synthase                                 | <b>0.38</b>  | 0.48745 |
| STM2917 | ygbK    | putative tRNA synthase                                 | <b>0.25</b>  | 0.68305 |
| STM2918 | ygbJ    | 3-hydroxyisobutyrate dehydrogenase                     | <b>-0.46</b> | 0.40566 |
| STM2918 | ygbJ    | 3-hydroxyisobutyrate dehydrogenase                     | <b>0.08</b>  | 0.89935 |
| STM2919 | ygbI    | putative regulatory protein                            | <b>0.01</b>  | 0.98564 |
| STM2919 | ygbI    | putative regulatory protein                            | <b>0.97</b>  | 0.12986 |
| STM2920 | STM2920 | putative transcriptional regulator                     | <b>-0.25</b> | 0.49421 |
| STM2920 | STM2920 | putative transcriptional regulator                     | <b>0.36</b>  | 0.40227 |
| STM2921 | STM2921 | putative flavoprotein                                  | <b>-0.36</b> | 0.35911 |
| STM2921 | STM2921 | putative flavoprotein                                  | <b>-0.06</b> | 0.91837 |
| STM2922 | STM2922 | putative 3-polyprenyl-4-hydroxybenzoate decarboxylase  | <b>-0.37</b> | 0.39255 |
| STM2922 | STM2922 | putative 3-polyprenyl-4-hydroxybenzoate decarboxylase  | <b>0.13</b>  | 0.79635 |
| STM2923 | STM2923 | putative cytoplasmic protein                           | <b>-1.04</b> | 0.13509 |
| STM2923 | STM2923 | putative cytoplasmic protein                           | <b>-0.11</b> | 0.81931 |
| STM2924 | rpoS    | RNA polymerase sigma factor                            | <b>0.09</b>  | 0.84788 |
| STM2924 | rpoS    | RNA polymerase sigma factor                            | <b>0.07</b>  | 0.87917 |
| STM2925 | nlpD    | lipoprotein                                            | <b>0.44</b>  | 0.31973 |
| STM2925 | nlpD    | lipoprotein                                            | <b>0.68</b>  | 0.24995 |
| STM2926 | pcm     | protein-L-isoaspartate O-methyltransferase             | <b>0.15</b>  | 0.69192 |
| STM2926 | pcm     | protein-L-isoaspartate O-methyltransferase             | <b>0.38</b>  | 0.36399 |
| STM2927 | surE    | acid phosphatase                                       | <b>0.03</b>  | 0.95390 |
| STM2927 | surE    | acid phosphatase                                       | <b>-0.01</b> | 0.97776 |
| STM2928 | ygbO    | tRNA pseudouridine synthase D                          | <b>0.07</b>  | 0.87512 |
| STM2928 | ygbO    | tRNA pseudouridine synthase D                          | <b>0.44</b>  | 0.28655 |
| STM2929 | ispF    | 2-C-methyl-D-erythritol 2,4-cyclodiphosphate synthase  | <b>-0.35</b> | 0.38080 |
| STM2929 | ispF    | 2-C-methyl-D-erythritol 2,4-cyclodiphosphate synthase  | <b>-0.35</b> | 0.35937 |
| STM2930 | ispD    | 2-C-methyl-D-erythritol 4-phosphate cytidyltransferase | <b>0.00</b>  | 0.99726 |
| STM2930 | ispD    | 2-C-methyl-D-erythritol 4-phosphate cytidyltransferase | <b>0.44</b>  | 0.31280 |
| STM2931 | ftsB    | cell division protein FtsB                             | <b>-0.55</b> | 0.30422 |
| STM2931 | ftsB    | cell division protein FtsB                             | <b>-0.06</b> | 0.87909 |
| STM2932 | ygbE    | putative inner membrane protein                        | <b>0.33</b>  | 0.40020 |
| STM2932 | ygbE    | putative inner membrane protein                        | <b>0.09</b>  | 0.86017 |
| STM2933 | cysC    | adenylylsulfate kinase                                 | <b>-0.22</b> | 0.77801 |
| STM2933 | cysC    | adenylylsulfate kinase                                 | <b>-0.08</b> | 0.87265 |
| STM2934 | cysN    | sulfate adenylyltransferase subunit 1                  | <b>-0.46</b> | 0.36619 |
| STM2934 | cysN    | sulfate adenylyltransferase subunit 1                  | <b>0.45</b>  | 0.35770 |
| STM2935 | cysD    | sulfate adenylyltransferase subunit 2                  | <b>-0.13</b> | 0.83789 |
| STM2935 | cysD    | sulfate adenylyltransferase subunit 2                  | <b>0.93</b>  | 0.17359 |
| STM2936 | iap     | aminopeptidase                                         | <b>-0.46</b> | 0.72700 |
| STM2936 | iap     | aminopeptidase                                         | <b>0.59</b>  | 0.42909 |
| STM2937 | ygbF    | putative inner membrane protein                        | <b>-0.22</b> | 0.55892 |
| STM2937 | ygbF    | putative inner membrane protein                        | <b>-0.08</b> | 0.90277 |
| STM2938 | STM2938 | putative cytoplasmic protein                           | <b>-0.31</b> | 0.62617 |
| STM2938 | STM2938 | putative cytoplasmic protein                           | <b>0.55</b>  | 0.22607 |
| STM2939 | ygch    | putative cytoplasmic protein                           | <b>0.08</b>  | 0.91079 |
| STM2939 | ygch    | putative cytoplasmic protein                           | <b>0.30</b>  | 0.62988 |
| STM2940 | STM2940 | putative cytoplasmic protein                           | <b>-0.42</b> | 0.42008 |
| STM2940 | STM2940 | putative cytoplasmic protein                           | <b>0.06</b>  | 0.90237 |
| STM2941 | yghJ    | putative cytoplasmic protein                           | <b>-0.27</b> | 0.56560 |
| STM2941 | yghJ    | putative cytoplasmic protein                           | <b>0.22</b>  | 0.61375 |
| STM2942 | STM2942 | putative transposase                                   | <b>0.01</b>  | 0.99213 |
| STM2942 | STM2942 | putative transposase                                   | <b>0.53</b>  | 0.38991 |
| STM2943 | STM2943 | putative cytoplasmic protein                           | <b>-0.26</b> | 0.81676 |
| STM2943 | STM2943 | putative cytoplasmic protein                           | <b>-0.48</b> | 0.33434 |
| STM2944 | ygcb    | putative helicase                                      | <b>-0.17</b> | 0.77974 |
| STM2944 | ygcb    | putative helicase                                      | <b>0.09</b>  | 0.86017 |
| STM2945 | sopD    | secreted effector protein                              | <b>0.52</b>  | 0.22087 |
| STM2945 | sopD    | secreted effector protein                              | <b>0.68</b>  | 0.21360 |

|            |            |                                                  |              |         |
|------------|------------|--------------------------------------------------|--------------|---------|
| STM2946    | cysH       | phosphoadenosine phosphosulfate reductase        | <b>-0.67</b> | 0.19967 |
| STM2946    | cysH       | phosphoadenosine phosphosulfate reductase        | <b>0.34</b>  | 0.61130 |
| STM2947    | cysI       | sulfite reductase alpha subunit                  | <b>-0.60</b> | 0.18622 |
| STM2947    | cysI       | sulfite reductase alpha subunit                  | <b>0.46</b>  | 0.44969 |
| STM2948    | cysJ       | sulfite reductase beta subunit                   | <b>-0.01</b> | 0.98156 |
| STM2948    | cysJ       | sulfite reductase beta subunit                   | <b>1.06</b>  | 0.38641 |
| STM2949    | ptpS       | putative 6-pyruvoyl tetrahydrobiopterin synthase | <b>0.00</b>  | 0.99997 |
| STM2949    | ptpS       | putative 6-pyruvoyl tetrahydrobiopterin synthase | <b>0.20</b>  | 0.58927 |
| STM2950    | STM2950    | putative metal-dependent hydrolase               | <b>-0.22</b> | 0.80976 |
| STM2950    | STM2950    | putative metal-dependent hydrolase               | <b>0.27</b>  | 0.59015 |
| STM2951    | ygcF       | hypothetical protein STM2951                     | <b>-0.23</b> | 0.60629 |
| STM2951    | ygcF       | hypothetical protein STM2951                     | <b>0.19</b>  | 0.67024 |
| STM2952    | eno        | phosphopyruvate hydratase                        | <b>-0.73</b> | 0.17152 |
| STM2952    | eno        | phosphopyruvate hydratase                        | <b>-0.06</b> | 0.91170 |
| STM2953    | pyrG       | CTP synthetase                                   | <b>-0.13</b> | 0.76502 |
| STM2953    | pyrG       | CTP synthetase                                   | <b>-0.05</b> | 0.92292 |
| STM2954    | mazG       | putative pyrophosphatase                         | <b>0.16</b>  | 0.75101 |
| STM2954    | mazG       | putative pyrophosphatase                         | <b>0.58</b>  | 0.41994 |
| STM2954,1n | STM2954,1n | hypothetical protein STM2954,1n                  | <b>-0.11</b> | 0.82145 |
| STM2954,1n | STM2954,1n | hypothetical protein STM2954,1n                  | <b>-0.21</b> | 0.62174 |
| STM2955,S  | STM2955,S  | putative transcriptional regulator               | <b>-0.84</b> | 0.13112 |
| STM2955,S  | STM2955,S  | putative transcriptional regulator               | <b>-0.31</b> | 0.41676 |
| STM2956    | relA       | (p)ppGpp synthetase I                            | <b>-0.43</b> | 0.49336 |
| STM2956    | relA       | (p)ppGpp synthetase I                            | <b>0.18</b>  | 0.74779 |
| STM2957    | rumA       | 23S rRNA (uracil-5-)-methyltransferase           | <b>-0.13</b> | 0.74374 |
| STM2957    | rumA       | 23S rRNA (uracil-5-)-methyltransferase           | <b>-0.02</b> | 0.96630 |
| STM2958    | barA       | sensor histidine kinase                          | <b>-1.17</b> | 0.07318 |
| STM2958    | barA       | sensor histidine kinase                          | <b>-0.06</b> | 0.91900 |
| STM2959    | STM2959    | putative glycerate kinase 2                      | <b>-0.05</b> | 0.95628 |
| STM2959    | STM2959    | putative glycerate kinase 2                      | <b>0.44</b>  | 0.46915 |
| STM2960    | gudD       | d-glucarate dehydratase                          | <b>-0.64</b> | 0.18918 |
| STM2960    | gudD       | d-glucarate dehydratase                          | <b>0.51</b>  | 0.38075 |
| STM2961    | ygcY       | putative D-glucarate dehydratase                 | <b>-0.37</b> | 0.57026 |
| STM2961    | ygcY       | putative D-glucarate dehydratase                 | <b>0.01</b>  | 0.98894 |
| STM2962    | gudT       | putative D-glucarate permease                    | <b>-0.09</b> | 0.91203 |
| STM2962    | gudT       | putative D-glucarate permease                    | <b>-0.39</b> | 0.37919 |
| STM2963    | STM2963    | flavodoxin                                       | <b>-0.53</b> | 0.29871 |
| STM2963    | STM2963    | flavodoxin                                       | <b>0.45</b>  | 0.52685 |
| STM2964    | yqcB       | putative pseudouridylate synthase                | <b>-0.76</b> | 0.23772 |
| STM2964    | yqcB       | putative pseudouridylate synthase                | <b>-0.11</b> | 0.82384 |
| STM2965    | yqcC       | putative cytoplasmic protein                     | <b>-0.05</b> | 0.91082 |
| STM2965    | yqcC       | putative cytoplasmic protein                     | <b>0.08</b>  | 0.85340 |
| STM2966    | csrB       | STM2966                                          | <b>-0.26</b> | 0.56772 |
| STM2966    | csrB       | STM2966                                          | <b>0.35</b>  | 0.50825 |
| STM2967    | syd        | SecY interacting protein Syd                     | <b>0.26</b>  | 0.47464 |
| STM2967    | syd        | SecY interacting protein Syd                     | <b>0.06</b>  | 0.91263 |
| STM2968    | yqcD       | putative GTP cyclohydrolase I                    | <b>0.12</b>  | 0.74388 |
| STM2968    | yqcD       | putative GTP cyclohydrolase I                    | <b>0.08</b>  | 0.83899 |
| STM2969    | ygdH       | putative nucleotide binding                      | <b>0.39</b>  | 0.29543 |
| STM2969    | ygdH       | putative nucleotide binding                      | <b>0.25</b>  | 0.50190 |
| STM2970    | sdaC       | putative serine transport protein                | <b>0.65</b>  | 0.22621 |
| STM2970    | sdaC       | putative serine transport protein                | <b>0.69</b>  | 0.19843 |
| STM2971    | sdaB       | L-serine dehydratase/L-threonine deaminase 2     | <b>-0.14</b> | 0.86176 |
| STM2971    | sdaB       | L-serine dehydratase/L-threonine deaminase 2     | <b>0.35</b>  | 0.51446 |
| STM2972    | xni        | exonuclease IX                                   | <b>0.34</b>  | 0.42269 |
| STM2972    | xni        | exonuclease IX                                   | <b>-0.01</b> | 0.99260 |
| STM2973    | fucO       | L-1,2-propanediol oxidoreductase                 | <b>-0.30</b> | 0.48386 |
| STM2973    | fucO       | L-1,2-propanediol oxidoreductase                 | <b>0.42</b>  | 0.38641 |
| STM2974    | fucA       | L-fucose phosphate aldolase                      | <b>-0.15</b> | 0.83982 |
| STM2974    | fucA       | L-fucose phosphate aldolase                      | <b>0.10</b>  | 0.83084 |
| STM2976    | fucl       | L-fucose isomerase                               | <b>0.14</b>  | 0.89546 |
| STM2976    | fucl       | L-fucose isomerase                               | <b>0.40</b>  | 0.29543 |
| STM2977    | fucK       | L-fuculokinase                                   | <b>-0.42</b> | 0.40947 |

|            |            |                                                    |              |         |
|------------|------------|----------------------------------------------------|--------------|---------|
| STM2977    | fucK       | L-fuculokinase                                     | <b>-0.11</b> | 0.83084 |
| STM2978    | fucU       | putative L-fucose-binding protein                  | <b>0.12</b>  | 0.83899 |
| STM2978    | fucU       | putative L-fucose-binding protein                  | <b>0.16</b>  | 0.75190 |
| STM2979    | fucR       | fuc operon positive regulator                      | <b>-0.18</b> | 0.72146 |
| STM2979    | fucR       | fuc operon positive regulator                      | <b>0.11</b>  | 0.79772 |
| STM2980    | ygdE       | putative SAM-dependent methyltransferase           | <b>-0.69</b> | 0.37241 |
| STM2980    | ygdE       | putative SAM-dependent methyltransferase           | <b>-0.19</b> | 0.61960 |
| STM2981    | ygdD       | hypothetical protein STM2981                       | <b>-0.14</b> | 0.73939 |
| STM2981    | ygdD       | hypothetical protein STM2981                       | <b>-0.09</b> | 0.84783 |
| STM2982    | gcvA       | gcv operon regulator                               | <b>0.44</b>  | 0.85210 |
| STM2982    | gcvA       | gcv operon regulator                               | <b>1.13</b>  | 0.48447 |
| STM2983    | ygdI       | putative lipoprotein                               | <b>-0.42</b> | 0.42048 |
| STM2983    | ygdI       | putative lipoprotein                               | <b>0.11</b>  | 0.87727 |
| STM2984    | csdA       | putative selenocysteine lyase                      | <b>-0.06</b> | 0.92008 |
| STM2984    | csdA       | putative selenocysteine lyase                      | <b>0.04</b>  | 0.93778 |
| STM2985    | ygdK       | putative FeS center assembly protein               | <b>-0.08</b> | 0.87999 |
| STM2985    | ygdK       | putative FeS center assembly protein               | <b>0.38</b>  | 0.38068 |
| STM2986,Sc | STM2986,Sc | putative integral membrane protein                 | <b>-0.25</b> | 0.58196 |
| STM2986,Sc | STM2986,Sc | putative integral membrane protein                 | <b>-0.12</b> | 0.80055 |
| STM2987    | ygdL       | putative enzyme                                    | <b>-0.59</b> | 0.20285 |
| STM2987    | ygdL       | putative enzyme                                    | <b>-0.04</b> | 0.93203 |
| STM2988    | mltA       | membrane-bound lytic murein transglycosylase A     | <b>-0.15</b> | 0.67816 |
| STM2988    | mltA       | membrane-bound lytic murein transglycosylase A     | <b>0.04</b>  | 0.94448 |
| STM2991    | amiC       | N-acetylmuramoyl-L-alanine amidase                 | <b>-0.23</b> | 0.66669 |
| STM2991    | amiC       | N-acetylmuramoyl-L-alanine amidase                 | <b>0.15</b>  | 0.76172 |
| STM2992    | argA       | N-acetylglutamate synthase                         | <b>-0.34</b> | 0.37154 |
| STM2992    | argA       | N-acetylglutamate synthase                         | <b>-0.04</b> | 0.93023 |
| STM2993    | recD       | exonuclease V alpha chain                          | <b>0.19</b>  | 0.69556 |
| STM2993    | recD       | exonuclease V alpha chain                          | <b>0.75</b>  | 0.31800 |
| STM2994    | recB       | exonuclease V beta chain                           | <b>-0.45</b> | 0.28861 |
| STM2994    | recB       | exonuclease V beta chain                           | <b>-0.41</b> | 0.34500 |
| STM2995    | ptr        | protease III                                       | <b>0.23</b>  | 0.74361 |
| STM2995    | ptr        | protease III                                       | <b>0.14</b>  | 0.69876 |
| STM2996    | recC       | exonuclease V subunit                              | <b>-0.07</b> | 0.91595 |
| STM2996    | recC       | exonuclease V subunit                              | <b>0.21</b>  | 0.61183 |
| STM2997    | ppdC       | prepilin peptidase dependent protein C             | <b>-0.24</b> | 0.66893 |
| STM2997    | ppdC       | prepilin peptidase dependent protein C             | <b>-0.04</b> | 0.93767 |
| STM2998    | ygdB       | putative periplasmic protein                       | <b>-0.26</b> | 0.59455 |
| STM2998    | ygdB       | putative periplasmic protein                       | <b>0.47</b>  | 0.27426 |
| STM2999    | ppdB       | prepilin peptidase-dependent protein B             | <b>0.08</b>  | 0.86506 |
| STM2999    | ppdB       | prepilin peptidase-dependent protein B             | <b>0.34</b>  | 0.68521 |
| STM3000    | ppdA       | prepilin peptidase-dependent protein A             | <b>-0.04</b> | 0.94050 |
| STM3000    | ppdA       | prepilin peptidase-dependent protein A             | <b>0.72</b>  | 0.42811 |
| STM3001    | thyA       | thymidylate synthase                               | <b>-0.01</b> | 0.98640 |
| STM3001    | thyA       | thymidylate synthase                               | <b>0.08</b>  | 0.91206 |
| STM3002    | lgt        | prolipoprotein diacylglycerol transferase          | <b>-0.40</b> | 0.53840 |
| STM3002    | lgt        | prolipoprotein diacylglycerol transferase          | <b>0.05</b>  | 0.95687 |
| STM3003    | ptsP       | transcriptional regulator                          | <b>-0.40</b> | 0.34553 |
| STM3003    | ptsP       | transcriptional regulator                          | <b>-0.40</b> | 0.30202 |
| STM3004    | ygdP       | dinucleoside polyphosphate hydrolase               | <b>-0.13</b> | 0.75158 |
| STM3004    | ygdP       | dinucleoside polyphosphate hydrolase               | <b>0.61</b>  | 0.24005 |
| STM3005    | mutH       | DNA mismatch repair protein                        | <b>0.05</b>  | 0.91271 |
| STM3005    | mutH       | DNA mismatch repair protein                        | <b>0.30</b>  | 0.54194 |
| STM3006    | ygdQ       | putative transport protein                         | <b>0.98</b>  | 0.12389 |
| STM3006    | ygdQ       | putative transport protein                         | <b>1.31</b>  | 0.05817 |
| STM3007    | ygdR       | putative peptide transport protein                 | <b>-0.35</b> | 0.47366 |
| STM3007    | ygdR       | putative peptide transport protein                 | <b>0.46</b>  | 0.51608 |
| STM3009    | ygeD       | putative efflux protein                            | <b>0.01</b>  | 0.99075 |
| STM3009    | ygeD       | putative efflux protein                            | <b>-0.19</b> | 0.61288 |
| STM3010    | aas        | 2-acyl-glycerophospho-ethanolamine acyltransferase | <b>-0.27</b> | 0.55019 |
| STM3010    | aas        | 2-acyl-glycerophospho-ethanolamine acyltransferase | <b>-0.18</b> | 0.70322 |
| STM3011    | galR       | galETK operon transcriptional repressor            | <b>-0.04</b> | 0.96630 |
| STM3011    | galR       | galETK operon transcriptional repressor            | <b>-0.30</b> | 0.58718 |

|            |            |                                          |              |         |
|------------|------------|------------------------------------------|--------------|---------|
| STM3012    | STM3012    | putative transcriptional regulator       | <b>-0.31</b> | 0.64664 |
| STM3012    | STM3012    | putative transcriptional regulator       | <b>0.11</b>  | 0.78521 |
| STM3013    | lysA       | diaminopimelate decarboxylase            | <b>-0.13</b> | 0.76008 |
| STM3013    | lysA       | diaminopimelate decarboxylase            | <b>0.41</b>  | 0.29848 |
| STM3014    | lysR       | transcriptional regulator                | <b>0.04</b>  | 0.95628 |
| STM3014    | lysR       | transcriptional regulator                | <b>-0.37</b> | 0.56993 |
| STM3015    | ygeA       | putative aspartate racemase              | <b>0.12</b>  | 0.81381 |
| STM3015    | ygeA       | putative aspartate racemase              | <b>0.96</b>  | 0.14435 |
| STM3016    | araE       | L-arabinose/proton symport protein       | <b>-0.25</b> | 0.63859 |
| STM3016    | araE       | L-arabinose/proton symport protein       | <b>-0.04</b> | 0.96423 |
| STM3017    | kduD       | 2-deoxy-D-gluconate 3-dehydrogenase      | <b>-0.43</b> | 0.34260 |
| STM3017    | kduD       | 2-deoxy-D-gluconate 3-dehydrogenase      | <b>0.16</b>  | 0.78109 |
| STM3018    | kduI       | 5-keto-4-deoxyuronate isomerase          | <b>-0.24</b> | 0.65857 |
| STM3018    | kduI       | 5-keto-4-deoxyuronate isomerase          | <b>-0.04</b> | 0.95608 |
| STM3019    | yqeF       | acetyl-CoA acetyltransferase             | <b>0.71</b>  | 0.21114 |
| STM3019    | yqeF       | acetyl-CoA acetyltransferase             | <b>1.00</b>  | 0.17754 |
| STM3020    | STM3020    | putative transcriptional regulator       | <b>-0.29</b> | 0.61634 |
| STM3020    | STM3020    | putative transcriptional regulator       | <b>0.12</b>  | 0.73473 |
| STM3021    | STM3021    | putative inner membrane protein          | <b>-0.02</b> | 0.97117 |
| STM3021    | STM3021    | putative inner membrane protein          | <b>0.30</b>  | 0.55978 |
| STM3022    | STM3022    | putative transport protein               | <b>0.18</b>  | 0.63148 |
| STM3022    | STM3022    | putative transport protein               | <b>0.48</b>  | 0.33452 |
| STM3023    | yohL       | putative cytoplasmic protein             | <b>-0.11</b> | 0.77847 |
| STM3023    | yohL       | putative cytoplasmic protein             | <b>0.62</b>  | 0.17139 |
| STM3024    | yohM       | putative inner membrane protein          | <b>0.08</b>  | 0.94087 |
| STM3024    | yohM       | putative inner membrane protein          | <b>0.02</b>  | 0.97720 |
| STM3025    | STM3025    | putative cytoplasmic protein             | <b>0.15</b>  | 0.76811 |
| STM3025    | STM3025    | putative cytoplasmic protein             | <b>0.00</b>  | 0.99997 |
| STM3025,1N | STM3025,1N | hypothetical protein STM3025,1N          | <b>-1.23</b> | 0.04814 |
| STM3025,1N | STM3025,1N | hypothetical protein STM3025,1N          | <b>0.41</b>  | 0.34070 |
| STM3026    | STM3026    | putative outer membrane protein          | <b>0.07</b>  | 0.91900 |
| STM3026    | STM3026    | putative outer membrane protein          | <b>0.19</b>  | 0.73473 |
| STM3027    | stdC       | putative fimbrial chaperone              | <b>0.23</b>  | 0.82161 |
| STM3027    | stdC       | putative fimbrial chaperone              | <b>0.23</b>  | 0.74481 |
| STM3028    | stdB       | putative outer membrane usher protein    | <b>0.22</b>  | 0.74224 |
| STM3028    | stdB       | putative outer membrane usher protein    | <b>0.76</b>  | 0.31422 |
| STM3029,S  | stdA       | putative fimbrial-like protein           | <b>-0.41</b> | 0.46629 |
| STM3029,S  | stdA       | putative fimbrial-like protein           | <b>0.47</b>  | 0.59156 |
| STM3030    | STM3030    | putative periplasmic protein             | <b>0.17</b>  | 0.70140 |
| STM3030    | STM3030    | putative periplasmic protein             | <b>1.02</b>  | 0.19976 |
| STM3031    | STM3031    | Ail/OmpX-like protein                    | <b>-0.26</b> | 0.59455 |
| STM3031    | STM3031    | Ail/OmpX-like protein                    | <b>0.37</b>  | 0.46629 |
| STM3033    | STM3033    | putative nucleic acid-binding protein    | <b>-0.26</b> | 0.48810 |
| STM3033    | STM3033    | putative nucleic acid-binding protein    | <b>0.18</b>  | 0.70562 |
| STM3036    | STM3036    | putative inner membrane protein          | <b>0.63</b>  | 0.61299 |
| STM3036    | STM3036    | putative inner membrane protein          | <b>0.37</b>  | 0.68232 |
| STM3037    | glyU       | STM3037                                  | <b>1.35</b>  | 0.38601 |
| STM3037    | glyU       | STM3037                                  | <b>1.85</b>  | 0.16783 |
| STM3038    | STM3038    | putative metalloendopeptidase            | <b>0.39</b>  | 0.48129 |
| STM3038    | STM3038    | putative metalloendopeptidase            | <b>1.10</b>  | 0.10283 |
| STM3039    | idi        | isopentenyl-diphosphate delta-isomerase  | <b>-0.14</b> | 0.77801 |
| STM3039    | idi        | isopentenyl-diphosphate delta-isomerase  | <b>-0.02</b> | 0.98539 |
| STM3040    | lysS       | lysyl-tRNA synthetase                    | <b>-0.08</b> | 0.85423 |
| STM3040    | lysS       | lysyl-tRNA synthetase                    | <b>0.03</b>  | 0.94050 |
| STM3041c   | prfB       | peptide chain release factor 2           | <b>-0.14</b> | 0.75330 |
| STM3041c   | prfB       | peptide chain release factor 2           | <b>0.31</b>  | 0.56800 |
| STM3042    | recJ       | single-stranded-DNA-specific exonuclease | <b>0.03</b>  | 0.97054 |
| STM3042    | recJ       | single-stranded-DNA-specific exonuclease | <b>0.20</b>  | 0.73343 |
| STM3043    | dsbC       | protein disulfide isomerase II           | <b>-0.18</b> | 0.67983 |
| STM3043    | dsbC       | protein disulfide isomerase II           | <b>0.49</b>  | 0.42580 |
| STM3044    | xerD       | tyrosine recombinase                     | <b>0.17</b>  | 0.68305 |
| STM3044    | xerD       | tyrosine recombinase                     | <b>0.28</b>  | 0.48270 |
| STM3045    | fldB       | flavodoxin                               | <b>-0.22</b> | 0.61205 |

|           |         |                                                       |              |         |
|-----------|---------|-------------------------------------------------------|--------------|---------|
| STM3045   | fldB    | flavodoxin                                            | <b>0.21</b>  | 0.61843 |
| STM3046   | ygfX    | putative inner membrane protein                       | <b>-0.08</b> | 0.90462 |
| STM3046   | ygfX    | putative inner membrane protein                       | <b>-0.11</b> | 0.82917 |
| STM3047   | ygfY    | putative cytoplasmic protein                          | <b>-0.24</b> | 0.54160 |
| STM3047   | ygfY    | putative cytoplasmic protein                          | <b>0.05</b>  | 0.93367 |
| STM3048   | ygfZ    | putative aminomethyltransferase                       | <b>-0.18</b> | 0.64172 |
| STM3048   | ygfZ    | putative aminomethyltransferase                       | <b>0.03</b>  | 0.95476 |
| STM3049   | yqfA    | putative hemolysin                                    | <b>-0.06</b> | 0.88337 |
| STM3049   | yqfA    | putative hemolysin                                    | <b>0.09</b>  | 0.86485 |
| STM3050   | yqfB    | hypothetical protein STM3050                          | <b>-0.13</b> | 0.79049 |
| STM3050   | yqfB    | hypothetical protein STM3050                          | <b>0.32</b>  | 0.48210 |
| STM3051   | bglA    | 6-phospho-beta-glucosidase A                          | <b>0.11</b>  | 0.78877 |
| STM3051   | bglA    | 6-phospho-beta-glucosidase A                          | <b>0.14</b>  | 0.87297 |
| STM3052   | STM3052 | putative outer membrane protein                       | <b>-0.35</b> | 0.40121 |
| STM3052   | STM3052 | putative outer membrane protein                       | <b>-0.19</b> | 0.70144 |
| STM3053   | gcvP    | glycine dehydrogenase                                 | <b>-0.54</b> | 0.21747 |
| STM3053   | gcvP    | glycine dehydrogenase                                 | <b>-0.02</b> | 0.97333 |
| STM3054   | gcvH    | glycine cleavage system protein H                     | <b>0.26</b>  | 0.57400 |
| STM3054   | gcvH    | glycine cleavage system protein H                     | <b>0.01</b>  | 0.98677 |
| STM3055   | gcvT    | aminomethyltransferase                                | <b>0.11</b>  | 0.83610 |
| STM3055   | gcvT    | aminomethyltransferase                                | <b>0.15</b>  | 0.70966 |
| STM3056   | visC    | hypothetical protein STM3056                          | <b>-0.23</b> | 0.64838 |
| STM3056   | visC    | hypothetical protein STM3056                          | <b>0.01</b>  | 0.98582 |
| STM3057   | ubiH    | 2-octaprenyl-6-methoxyphenyl hydroxylase              | <b>-0.19</b> | 0.59528 |
| STM3057   | ubiH    | 2-octaprenyl-6-methoxyphenyl hydroxylase              | <b>-0.10</b> | 0.82533 |
| STM3058   | pepP    | proline aminopeptidase P II                           | <b>-0.81</b> | 0.18873 |
| STM3058   | pepP    | proline aminopeptidase P II                           | <b>-0.39</b> | 0.33082 |
| STM3059,S | ygfB    | hypothetical protein STM3059,S                        | <b>-0.44</b> | 0.46720 |
| STM3059,S | ygfB    | hypothetical protein STM3059,S                        | <b>-0.26</b> | 0.51545 |
| STM3060   | ygfE    | putative cytoplasmic protein                          | <b>-0.22</b> | 0.61364 |
| STM3060   | ygfE    | putative cytoplasmic protein                          | <b>-0.04</b> | 0.92351 |
| STM3061   | ygfA    | putative ligase                                       | <b>-0.35</b> | 0.41422 |
| STM3061   | ygfA    | putative ligase                                       | <b>0.04</b>  | 0.94990 |
| STM3062   | serA    | D-3-phosphoglycerate dehydrogenase                    | <b>-0.43</b> | 0.44416 |
| STM3062   | serA    | D-3-phosphoglycerate dehydrogenase                    | <b>0.46</b>  | 0.23114 |
| STM3063   | rpiA    | ribose-5-phosphate isomerase A                        | <b>0.23</b>  | 0.52166 |
| STM3063   | rpiA    | ribose-5-phosphate isomerase A                        | <b>0.44</b>  | 0.29532 |
| STM3064   | iciA    | chromosome replication initiation inhibitor protein   | <b>-0.04</b> | 0.96757 |
| STM3064   | iciA    | chromosome replication initiation inhibitor protein   | <b>0.64</b>  | 0.29912 |
| STM3065   | yggE    | hypothetical protein STM3065                          | <b>-0.45</b> | 0.34449 |
| STM3065   | yggE    | hypothetical protein STM3065                          | <b>0.11</b>  | 0.88765 |
| STM3066   | yggA    | arginine exporter protein                             | <b>-0.09</b> | 0.87733 |
| STM3066   | yggA    | arginine exporter protein                             | <b>-0.21</b> | 0.74231 |
| STM3067   | yggB    | putative mechanosensitive channel                     | <b>-0.15</b> | 0.72129 |
| STM3067   | yggB    | putative mechanosensitive channel                     | <b>0.39</b>  | 0.30422 |
| STM3068   | fba     | fructose-bisphosphate aldolase                        | <b>0.07</b>  | 0.90462 |
| STM3068   | fba     | fructose-bisphosphate aldolase                        | <b>0.40</b>  | 0.43219 |
| STM3069   | pgk     | phosphoglycerate kinase                               | <b>1.98</b>  | 0.52840 |
| STM3069   | pgk     | phosphoglycerate kinase                               | <b>-0.13</b> | 0.72987 |
| STM3070   | epd     | D-erythrose 4-phosphate dehydrogenase                 | <b>-0.06</b> | 0.88653 |
| STM3070   | epd     | D-erythrose 4-phosphate dehydrogenase                 | <b>-0.03</b> | 0.96107 |
| STM3071   | STM3071 | putative DNA-binding protein                          | <b>0.00</b>  | 0.99806 |
| STM3071   | STM3071 | putative DNA-binding protein                          | <b>0.19</b>  | 0.69398 |
| STM3072   | STM3072 | putative inner membrane protein                       | <b>-0.18</b> | 0.74481 |
| STM3072   | STM3072 | putative inner membrane protein                       | <b>0.18</b>  | 0.71783 |
|           |         | putative ABC-type cobalt transport system permease    |              |         |
| STM3073   | STM3073 | component                                             | <b>-0.37</b> | 0.46266 |
|           |         | putative ABC-type cobalt transport system permease    |              |         |
| STM3073   | STM3073 | component                                             | <b>0.30</b>  | 0.48700 |
|           |         | putative ABC-type cobalt transport system ATP-binding |              |         |
| STM3074   | STM3074 | component                                             | <b>-0.24</b> | 0.65709 |
|           |         | putative ABC-type cobalt transport system ATP-binding |              |         |
| STM3074   | STM3074 | component                                             | <b>0.45</b>  | 0.55598 |

|           |           |                                                                 |              |         |
|-----------|-----------|-----------------------------------------------------------------|--------------|---------|
| STM3075   | STM3075   | putative ABC-type cobalt transport system ATP-binding component | <b>-0.12</b> | 0.86190 |
| STM3075   | STM3075   | putative ABC-type cobalt transport system ATP-binding component | <b>-0.22</b> | 0.62552 |
| STM3076   | tktA      | transketolase                                                   | <b>-0.29</b> | 0.45848 |
| STM3076   | tktA      | transketolase                                                   | <b>-0.03</b> | 0.94485 |
| STM3077   | yggG      | putative Zn-dependent protease                                  | <b>-0.22</b> | 0.56565 |
| STM3077   | yggG      | putative Zn-dependent protease                                  | <b>0.32</b>  | 0.52511 |
| STM3078   | speB      | agmatinase                                                      | <b>-0.08</b> | 0.91019 |
| STM3078   | speB      | agmatinase                                                      | <b>0.17</b>  | 0.68030 |
| STM3079,S | STM3079,S | putative hydrolase/acyltransferase                              | <b>-0.33</b> | 0.44832 |
| STM3079,S | STM3079,S | putative hydrolase/acyltransferase                              | <b>-0.19</b> | 0.63514 |
| STM3080   | STM3080   | putative mannitol dehydrogenase                                 | <b>-0.60</b> | 0.35010 |
| STM3080   | STM3080   | putative mannitol dehydrogenase                                 | <b>0.14</b>  | 0.81667 |
| STM3081   | STM3081   | putative malate/L-lactate dehydrogenase                         | <b>-0.56</b> | 0.28049 |
| STM3081   | STM3081   | putative malate/L-lactate dehydrogenase                         | <b>-0.17</b> | 0.75424 |
| STM3082   | STM3082   | putative zinc-binding dehydrogenase                             | <b>-0.22</b> | 0.62860 |
| STM3082   | STM3082   | putative zinc-binding dehydrogenase                             | <b>0.44</b>  | 0.36864 |
| STM3083   | STM3083   | putative mannitol dehydrogenase                                 | <b>-0.28</b> | 0.55393 |
| STM3083   | STM3083   | putative mannitol dehydrogenase                                 | <b>0.20</b>  | 0.74361 |
| STM3084,S | STM3084,S | putative regulatory protein                                     | <b>0.01</b>  | 0.98140 |
| STM3084,S | STM3084,S | putative regulatory protein                                     | <b>0.53</b>  | 0.19398 |
| STM3085   | STM3085   | putative outer membrane lipoprotein                             | <b>0.02</b>  | 0.98070 |
| STM3085   | STM3085   | putative outer membrane lipoprotein                             | <b>-0.04</b> | 0.95081 |
| STM3086   | speA      | arginine decarboxylase                                          | <b>-0.39</b> | 0.37718 |
| STM3086   | speA      | arginine decarboxylase                                          | <b>-0.07</b> | 0.87775 |
| STM3087   | yqgB      | putative inner membrane protein                                 | <b>0.18</b>  | 0.62619 |
| STM3087   | yqgB      | putative inner membrane protein                                 | <b>-0.02</b> | 0.97720 |
| STM3089   | yqgD      | putative inner membrane protein                                 | <b>-0.02</b> | 0.98140 |
| STM3089   | yqgD      | putative inner membrane protein                                 | <b>-0.05</b> | 0.94426 |
| STM3090   | metK      | S-adenosylmethionine synthetase                                 | <b>-0.61</b> | 0.30813 |
| STM3090   | metK      | S-adenosylmethionine synthetase                                 | <b>-0.32</b> | 0.52419 |
| STM3091   | galP      | galactose/proton symporter                                      | <b>-0.45</b> | 0.34332 |
| STM3091   | galP      | galactose/proton symporter                                      | <b>0.17</b>  | 0.68434 |
| STM3092   | sprT      | hypothetical protein STM3092                                    | <b>-0.28</b> | 0.66677 |
| STM3092   | sprT      | hypothetical protein STM3092                                    | <b>0.03</b>  | 0.95703 |
| STM3092   | sprT      | hypothetical protein STM3092                                    | <b>0.05</b>  | 0.94087 |
| STM3092   | sprT      | hypothetical protein STM3092                                    | <b>0.22</b>  | 0.61679 |
| STM3093   | endA      | DNA-specific endonuclease I                                     | <b>-0.25</b> | 0.61982 |
| STM3093   | endA      | DNA-specific endonuclease I                                     | <b>0.01</b>  | 0.98877 |
| STM3094   | yggJ      | putative cytoplasmic protein                                    | <b>-0.12</b> | 0.74784 |
| STM3094   | yggJ      | putative cytoplasmic protein                                    | <b>0.09</b>  | 0.81872 |
| STM3095   | gshB      | glutathione synthetase                                          | <b>-0.22</b> | 0.56936 |
| STM3095   | gshB      | glutathione synthetase                                          | <b>0.20</b>  | 0.73698 |
| STM3096   | yqgE      | hypothetical protein STM3096                                    | <b>0.04</b>  | 0.93924 |
| STM3096   | yqgE      | hypothetical protein STM3096                                    | <b>0.04</b>  | 0.94417 |
| STM3097   | yqgF      | Holliday junction resolvase-like protein                        | <b>-0.01</b> | 0.99353 |
| STM3097   | yqgF      | Holliday junction resolvase-like protein                        | <b>0.17</b>  | 0.64314 |
| STM3098   | STM3098   | putative transcriptional regulator                              | <b>0.05</b>  | 0.96968 |
| STM3098   | STM3098   | putative transcriptional regulator                              | <b>0.39</b>  | 0.39127 |
| STM3099   | yggR      | twitching motility protein                                      | <b>-0.87</b> | 0.11913 |
| STM3099   | yggR      | twitching motility protein                                      | <b>0.26</b>  | 0.66332 |
| STM3100   | yggS      | hypothetical protein STM3100                                    | <b>-0.12</b> | 0.74087 |
| STM3100   | yggS      | hypothetical protein STM3100                                    | <b>-0.05</b> | 0.91428 |
| STM3101   | yggT      | putative integral membrane protein                              | <b>0.21</b>  | 0.58410 |
| STM3101   | yggT      | putative integral membrane protein                              | <b>-0.03</b> | 0.95220 |
| STM3102   | yggU      | hypothetical protein STM3102                                    | <b>-0.29</b> | 0.50716 |
| STM3102   | yggU      | hypothetical protein STM3102                                    | <b>0.11</b>  | 0.79180 |
| STM3103   | yggV      | putative deoxyribonucleotide triphosphate pyrophosphatase       | <b>0.00</b>  | 0.99367 |
| STM3103   | yggV      | putative deoxyribonucleotide triphosphate pyrophosphatase       | <b>0.39</b>  | 0.40633 |
| STM3104   | yggW      | coproporphyrinogen III oxidase                                  | <b>-0.14</b> | 0.70249 |

|         |         |                                                |              |         |
|---------|---------|------------------------------------------------|--------------|---------|
| STM3104 | yggW    | coproporphyrinogen III oxidase                 | <b>0.00</b>  | 0.99546 |
| STM3105 | yggM    | putative periplasmic protein                   | <b>0.33</b>  | 0.58822 |
| STM3105 | yggM    | putative periplasmic protein                   | <b>1.09</b>  | 0.19236 |
| STM3106 | ansB    | periplasmic L-asparaginase II                  | <b>0.12</b>  | 0.80490 |
| STM3106 | ansB    | periplasmic L-asparaginase II                  | <b>0.16</b>  | 0.78335 |
| STM3107 | yggN    | putative periplasmic protein                   | <b>-0.44</b> | 0.25823 |
| STM3107 | yggN    | putative periplasmic protein                   | <b>-0.31</b> | 0.46674 |
| STM3108 | yggL    | putative cytoplasmic protein                   | <b>-0.42</b> | 0.27004 |
| STM3108 | yggL    | putative cytoplasmic protein                   | <b>-0.16</b> | 0.79114 |
| STM3109 | yggH    | tRNA (guanine-N(7)-)-methyltransferase         | <b>-0.06</b> | 0.88217 |
| STM3109 | yggH    | tRNA (guanine-N(7)-)-methyltransferase         | <b>0.17</b>  | 0.65181 |
| STM3110 | mutY    | adenine DNA glycosylase                        | <b>0.40</b>  | 0.63148 |
| STM3110 | mutY    | adenine DNA glycosylase                        | <b>0.60</b>  | 0.42511 |
| STM3111 | yggX    | hypothetical protein STM3111                   | <b>-0.71</b> | 0.13645 |
| STM3111 | yggX    | hypothetical protein STM3111                   | <b>0.01</b>  | 0.98135 |
| STM3112 | mltC    | membrane-bound lytic murein transglycosylase C | <b>0.21</b>  | 0.60169 |
| STM3112 | mltC    | membrane-bound lytic murein transglycosylase C | <b>0.22</b>  | 0.66969 |
| STM3113 | nupG    | nucleoside transport                           | <b>0.36</b>  | 0.38389 |
| STM3113 | nupG    | nucleoside transport                           | <b>1.21</b>  | 0.11690 |
| STM3114 | speC    | ornithine decarboxylase isozyme                | <b>-0.04</b> | 0.94341 |
| STM3114 | speC    | ornithine decarboxylase isozyme                | <b>1.13</b>  | 0.14030 |
| STM3115 | yqgA    | putative inner membrane protein                | <b>-0.10</b> | 0.83545 |
| STM3115 | yqgA    | putative inner membrane protein                | <b>0.38</b>  | 0.42935 |
| STM3116 | pheV    | STM3116                                        | <b>-0.68</b> | 0.46578 |
| STM3116 | pheV    | STM3116                                        | <b>-0.36</b> | 0.51381 |
| STM3116 | pheV    | STM3116                                        | <b>-0.05</b> | 0.94470 |
| STM3116 | pheV    | STM3116                                        | <b>-0.21</b> | 0.62503 |
| STM3118 | STM3118 | putative acetyl-CoA hydrolase                  | <b>-0.63</b> | 0.34148 |
| STM3118 | STM3118 | putative acetyl-CoA hydrolase                  | <b>0.14</b>  | 0.83343 |
| STM3119 | STM3119 | putative monoamine oxidase                     | <b>-0.36</b> | 0.49336 |
| STM3119 | STM3119 | putative monoamine oxidase                     | <b>0.13</b>  | 0.88018 |
| STM3120 | STM3120 | putative transcriptional regulator             | <b>-0.34</b> | 0.41508 |
| STM3120 | STM3120 | putative transcriptional regulator             | <b>-0.01</b> | 0.98976 |
| STM3121 | STM3121 | putative transcriptional regulator             | <b>0.03</b>  | 0.97804 |
| STM3121 | STM3121 | putative transcriptional regulator             | <b>0.19</b>  | 0.72241 |
| STM3122 | STM3122 | putative arylsulfatase                         | <b>-0.35</b> | 0.43881 |
| STM3122 | STM3122 | putative arylsulfatase                         | <b>0.10</b>  | 0.88433 |
| STM3123 | STM3123 | putative arylsulfatase regulator               | <b>-0.44</b> | 0.40808 |
| STM3123 | STM3123 | putative arylsulfatase regulator               | <b>0.32</b>  | 0.65974 |
| STM3124 | STM3124 | putative response regulator                    | <b>-0.16</b> | 0.87655 |
| STM3124 | STM3124 | putative response regulator                    | <b>0.37</b>  | 0.36511 |
| STM3125 | STM3125 | putative cytoplasmic protein                   | <b>-0.24</b> | 0.62479 |
| STM3125 | STM3125 | putative cytoplasmic protein                   | <b>0.37</b>  | 0.38552 |
| STM3126 | STM3126 | putative amino acid transporter                | <b>-0.16</b> | 0.80660 |
| STM3126 | STM3126 | putative amino acid transporter                | <b>0.18</b>  | 0.73188 |
| STM3127 | STM3127 | putative cytoplasmic protein                   | <b>-0.03</b> | 0.96595 |
| STM3127 | STM3127 | putative cytoplasmic protein                   | <b>-0.05</b> | 0.93435 |
| STM3128 | STM3128 | putative oxidoreductase                        | <b>0.40</b>  | 0.46629 |
| STM3128 | STM3128 | putative oxidoreductase                        | <b>0.04</b>  | 0.94852 |
| STM3129 | STM3129 | putative NAD-dependent aldehyde dehydrogenase  | <b>-0.72</b> | 0.30813 |
| STM3129 | STM3129 | putative NAD-dependent aldehyde dehydrogenase  | <b>-0.31</b> | 0.70185 |
| STM3131 | STM3131 | putative cytoplasmic protein                   | <b>0.18</b>  | 0.66482 |
| STM3131 | STM3131 | putative cytoplasmic protein                   | <b>1.00</b>  | 0.23114 |
| STM3132 | STM3132 | putative xylanase/chitin deacetylase           | <b>0.50</b>  | 0.22602 |
| STM3132 | STM3132 | putative xylanase/chitin deacetylase           | <b>0.56</b>  | 0.46720 |
| STM3133 | STM3133 | putative amidohydrolase                        | <b>-0.10</b> | 0.86495 |
| STM3133 | STM3133 | putative amidohydrolase                        | <b>-0.04</b> | 0.97333 |
| STM3134 | STM3134 | putative permease                              | <b>0.45</b>  | 0.35373 |
| STM3134 | STM3134 | putative permease                              | <b>0.52</b>  | 0.37154 |
| STM3135 | STM3135 | mannonate dehydratase                          | <b>0.60</b>  | 0.32673 |
| STM3135 | STM3135 | mannonate dehydratase                          | <b>0.61</b>  | 0.22285 |
| STM3136 | STM3136 | putative D-mannonate oxidoreductase            | <b>-0.31</b> | 0.61183 |
| STM3136 | STM3136 | putative D-mannonate oxidoreductase            | <b>0.72</b>  | 0.22540 |

|           |           |                                                          |              |         |
|-----------|-----------|----------------------------------------------------------|--------------|---------|
| STM3137   | STM3137   | uronate isomerase                                        | <b>-0.07</b> | 0.87727 |
| STM3137   | STM3137   | uronate isomerase                                        | <b>0.30</b>  | 0.42811 |
| STM3138   | STM3138   | putative methyl-accepting chemotaxis protein             | <b>-0.50</b> | 0.27763 |
| STM3138   | STM3138   | putative methyl-accepting chemotaxis protein             | <b>0.24</b>  | 0.65312 |
|           |           | glutathionylspermidine synthetase/glutathionylspermidine |              |         |
| STM3139   | gsp       | amidase                                                  | <b>1.04</b>  | 0.18426 |
|           |           | glutathionylspermidine synthetase/glutathionylspermidine |              |         |
| STM3139   | gsp       | amidase                                                  | <b>1.59</b>  | 0.11690 |
| STM3140   | yghU      | putative glutathione S-transferase                       | <b>-0.13</b> | 0.83899 |
| STM3140   | yghU      | putative glutathione S-transferase                       | <b>0.37</b>  | 0.38260 |
| STM3141   | STM3141   | hypothetical protein STM3141                             | <b>-0.14</b> | 0.70545 |
| STM3141   | STM3141   | hypothetical protein STM3141                             | <b>0.78</b>  | 0.27378 |
| STM3142   | STM3142   | putative periplasmic ferrichrome-binding protein         | <b>-0.29</b> | 0.51671 |
| STM3142   | STM3142   | putative periplasmic ferrichrome-binding protein         | <b>0.44</b>  | 0.47553 |
| STM3143   | hybG      | chaperone-like protein                                   | <b>-0.47</b> | 0.26254 |
| STM3143   | hybG      | chaperone-like protein                                   | <b>0.07</b>  | 0.87707 |
| STM3144   | hypA      | hydrogenase nickel incorporation protein                 | <b>-0.18</b> | 0.62867 |
| STM3144   | hypA      | hydrogenase nickel incorporation protein                 | <b>-0.03</b> | 0.95397 |
| STM3145   | hybE      | putative hydrogenase                                     | <b>-0.26</b> | 0.49336 |
| STM3145   | hybE      | putative hydrogenase                                     | <b>-0.07</b> | 0.89617 |
| STM3146   | hybD      | putative hydrogenase-2 processing element                | <b>0.05</b>  | 0.92716 |
| STM3146   | hybD      | putative hydrogenase-2 processing element                | <b>0.52</b>  | 0.32481 |
| STM3147   | hybC      | hydrogenase-2 large subunit                              | <b>0.35</b>  | 0.57407 |
| STM3147   | hybC      | hydrogenase-2 large subunit                              | <b>0.57</b>  | 0.33618 |
| STM3148   | hybB      | putative chaperone                                       | <b>0.13</b>  | 0.78734 |
| STM3148   | hybB      | putative chaperone                                       | <b>0.40</b>  | 0.31004 |
| STM3149   | hybA      | putative hydrogenase-2 component                         | <b>0.22</b>  | 0.59820 |
| STM3149   | hybA      | putative hydrogenase-2 component                         | <b>0.15</b>  | 0.74272 |
| STM3150   | hypO      | putative Ni/Fe hydrogenase small subunit                 | <b>-0.44</b> | 0.39364 |
| STM3150   | hypO      | putative Ni/Fe hydrogenase small subunit                 | <b>0.44</b>  | 0.44208 |
| STM3151   | yghW      | putative cytoplasmic protein                             | <b>0.13</b>  | 0.75319 |
| STM3151   | yghW      | putative cytoplasmic protein                             | <b>0.24</b>  | 0.62216 |
| STM3152   | STM3152   | putative methyl-accepting chemotaxis protein             | <b>0.07</b>  | 0.86654 |
| STM3152   | STM3152   | putative methyl-accepting chemotaxis protein             | <b>0.03</b>  | 0.95815 |
| STM3153   | yqhA      | hypothetical protein STM3153                             | <b>0.02</b>  | 0.96785 |
| STM3153   | yqhA      | hypothetical protein STM3153                             | <b>-0.12</b> | 0.80010 |
| STM3154   | STM3154   | putative ATP-dependent RNA helicase-like protein         | <b>-0.16</b> | 0.68450 |
| STM3154   | STM3154   | putative ATP-dependent RNA helicase-like protein         | <b>0.02</b>  | 0.96785 |
| STM3155   | STM3155   | putative cytoplasmic protein                             | <b>0.15</b>  | 0.74212 |
| STM3155   | STM3155   | putative cytoplasmic protein                             | <b>0.85</b>  | 0.14285 |
| STM3156   | STM3156   | putative cytoplasmic protein                             | <b>0.09</b>  | 0.83897 |
| STM3156   | STM3156   | putative cytoplasmic protein                             | <b>0.68</b>  | 0.16281 |
| STM3157   | yghA      | oxidoreductase                                           | <b>-0.02</b> | 0.98539 |
| STM3157   | yghA      | oxidoreductase                                           | <b>0.29</b>  | 0.62757 |
| STM3158   | exbD      | energy transduction protein                              | <b>-0.71</b> | 0.17041 |
| STM3158   | exbD      | energy transduction protein                              | <b>0.16</b>  | 0.66751 |
| STM3159   | exbB      | energy transduction protein                              | <b>-0.34</b> | 0.38260 |
| STM3159   | exbB      | energy transduction protein                              | <b>0.05</b>  | 0.92529 |
| STM3160   | STM3160   | putative inner membrane protein                          | <b>0.47</b>  | 0.26164 |
| STM3160   | STM3160   | putative inner membrane protein                          | <b>0.25</b>  | 0.53811 |
| STM3161   | metC      | cystathionine beta-lyase                                 | <b>0.02</b>  | 0.97474 |
| STM3161   | metC      | cystathionine beta-lyase                                 | <b>0.46</b>  | 0.44214 |
| STM3162   | yghB      | hypothetical protein STM3162                             | <b>-0.17</b> | 0.67206 |
| STM3162   | yghB      | hypothetical protein STM3162                             | <b>0.24</b>  | 0.52826 |
| STM3163   | yqhC      | putative transcriptional regulator                       | <b>0.04</b>  | 0.96865 |
| STM3163   | yqhC      | putative transcriptional regulator                       | <b>-0.15</b> | 0.73968 |
| STM3164   | yqhD      | putative alcohol dehydrogenase                           | <b>-0.05</b> | 0.94765 |
| STM3164   | yqhD      | putative alcohol dehydrogenase                           | <b>0.42</b>  | 0.31919 |
| STM3165   | yqhE      | 2,5-diketo-D-gluconate reductase A                       | <b>-0.20</b> | 0.63536 |
| STM3165   | yqhE      | 2,5-diketo-D-gluconate reductase A                       | <b>0.89</b>  | 0.45947 |
| STM3166,S | STM3166,S | putative cation transporter                              | <b>-0.04</b> | 0.94004 |
| STM3166,S | STM3166,S | putative cation transporter                              | <b>0.28</b>  | 0.58841 |
| STM3167   | STM3167   | putative diadenosine tetraphosphatehydrolase             | <b>-0.01</b> | 0.99540 |

|           |         |                                                    |              |         |
|-----------|---------|----------------------------------------------------|--------------|---------|
| STM3167   | STM3167 | putative diadenosine tetraphosphatehydrolase       | <b>0.70</b>  | 0.27753 |
| STM3168   | ygiR    | hypothetical protein STM3168                       | <b>0.42</b>  | 0.69398 |
| STM3168   | ygiR    | hypothetical protein STM3168                       | <b>1.00</b>  | 0.38260 |
| STM3169   | STM3169 | putative periplasmic dicarboxylate-binding protein | <b>-0.82</b> | 0.34719 |
| STM3169   | STM3169 | putative periplasmic dicarboxylate-binding protein | <b>-0.11</b> | 0.81651 |
| STM3170   | STM3170 | putative inner membrane protein                    | <b>-0.12</b> | 0.78335 |
| STM3170   | STM3170 | putative inner membrane protein                    | <b>0.29</b>  | 0.52511 |
| STM3171   | ygiK    | putative transporter                               | <b>0.00</b>  | 0.99887 |
| STM3171   | ygiK    | putative transporter                               | <b>0.23</b>  | 0.61285 |
| STM3172   | sufl    | suppressor of ftsI                                 | <b>-0.16</b> | 0.70430 |
| STM3172   | sufl    | suppressor of ftsI                                 | <b>0.15</b>  | 0.77931 |
| STM3173   | plsC    | 1-acyl-sn-glycerol-3-phosphate acyltransferase     | <b>-0.11</b> | 0.87208 |
| STM3173   | plsC    | 1-acyl-sn-glycerol-3-phosphate acyltransferase     | <b>0.10</b>  | 0.82533 |
| STM3174   | parC    | DNA topoisomerase IV subunit A                     | <b>-0.23</b> | 0.50825 |
| STM3174   | parC    | DNA topoisomerase IV subunit A                     | <b>-0.13</b> | 0.84622 |
| STM3175   | STM3175 | putative regulatory protein                        | <b>-0.08</b> | 0.84873 |
| STM3175   | STM3175 | putative regulatory protein                        | <b>0.10</b>  | 0.82637 |
| STM3176   | ygiW    | putative outer membrane protein                    | <b>0.02</b>  | 0.97403 |
| STM3176   | ygiW    | putative outer membrane protein                    | <b>0.65</b>  | 0.16981 |
| STM3177   | ygiX    | putative transcriptional regulator                 | <b>0.10</b>  | 0.82673 |
| STM3177   | ygiX    | putative transcriptional regulator                 | <b>0.24</b>  | 0.52101 |
| STM3178   | ygiY    | putative sensor histidine kinase                   | <b>-0.42</b> | 0.43219 |
| STM3178   | ygiY    | putative sensor histidine kinase                   | <b>-0.02</b> | 0.96805 |
| STM3179   | mdaB    | NADPH-specific quinone oxidoreductase              | <b>-0.18</b> | 0.71113 |
| STM3179   | mdaB    | NADPH-specific quinone oxidoreductase              | <b>0.04</b>  | 0.94062 |
| STM3180   | ygiN    | putative cytoplasmic protein                       | <b>-0.05</b> | 0.92513 |
| STM3180   | ygiN    | putative cytoplasmic protein                       | <b>0.09</b>  | 0.86247 |
| STM3181   | parE    | DNA topoisomerase IV subunit B                     | <b>-0.21</b> | 0.60051 |
| STM3181   | parE    | DNA topoisomerase IV subunit B                     | <b>-0.16</b> | 0.78211 |
| STM3182   | yqiA    | putative esterase                                  | <b>-0.06</b> | 0.91917 |
| STM3182   | yqiA    | putative esterase                                  | <b>0.13</b>  | 0.78633 |
|           |         | cyclic 3',5'-adenosine monophosphate               |              |         |
| STM3183   | icc     | phosphodiesterase                                  | <b>0.02</b>  | 0.97402 |
|           |         | cyclic 3',5'-adenosine monophosphate               |              |         |
| STM3183   | icc     | phosphodiesterase                                  | <b>0.24</b>  | 0.58147 |
| STM3184   | yqiB    | putative cytoplasmic protein                       | <b>0.18</b>  | 0.66641 |
| STM3184   | yqiB    | putative cytoplasmic protein                       | <b>0.14</b>  | 0.77745 |
| STM3185   | yqiE    | ADP-ribose pyrophosphatase                         | <b>-0.15</b> | 0.78795 |
| STM3185   | yqiE    | ADP-ribose pyrophosphatase                         | <b>0.27</b>  | 0.47159 |
| STM3186   | tolC    | outer membrane channel precursor protein           | <b>-0.25</b> | 0.63887 |
| STM3186   | tolC    | outer membrane channel precursor protein           | <b>-0.43</b> | 0.42266 |
| STM3187   | ygiB    | putative inner membrane protein                    | <b>-0.14</b> | 0.72450 |
| STM3187   | ygiB    | putative inner membrane protein                    | <b>0.14</b>  | 0.74091 |
| STM3188   | ygiC    | putative glutathionylspermidine synthase           | <b>0.01</b>  | 0.99182 |
| STM3188   | ygiC    | putative glutathionylspermidine synthase           | <b>0.11</b>  | 0.83928 |
| STM3189   | ygiD    | putative cytoplasmic protein                       | <b>-0.06</b> | 0.90400 |
| STM3189   | ygiD    | putative cytoplasmic protein                       | <b>0.76</b>  | 0.38729 |
| STM3190   | ygiE    | zinc transporter ZupT                              | <b>-0.42</b> | 0.29871 |
| STM3190   | ygiE    | zinc transporter ZupT                              | <b>-0.19</b> | 0.68305 |
| STM3191   | STM3191 | putative arylsulfate sulfotransferase              | <b>0.02</b>  | 0.97127 |
| STM3191   | STM3191 | putative arylsulfate sulfotransferase              | <b>0.51</b>  | 0.28799 |
| STM3193   | STM3193 | putative disulfide bond formation protein          | <b>-0.03</b> | 0.95737 |
| STM3193   | STM3193 | putative disulfide bond formation protein          | <b>0.09</b>  | 0.89024 |
| STM3194   | STM3194 | putative disulfide oxidoreductase                  | <b>-0.25</b> | 0.67351 |
| STM3194   | STM3194 | putative disulfide oxidoreductase                  | <b>0.19</b>  | 0.80077 |
| STM3195   | ribB    | 3,4-dihydroxy-2-butanone 4-phosphate synthase      | <b>-0.03</b> | 0.95538 |
| STM3195   | ribB    | 3,4-dihydroxy-2-butanone 4-phosphate synthase      | <b>0.19</b>  | 0.64302 |
| STM3196,S | yqiC    | putative cytoplasmic protein                       | <b>-1.02</b> | 0.17074 |
| STM3196,S | yqiC    | putative cytoplasmic protein                       | <b>0.05</b>  | 0.90587 |
| STM3197   | glgS    | glycogen synthesis protein GlgS                    | <b>-0.22</b> | 0.65984 |
| STM3197   | glgS    | glycogen synthesis protein GlgS                    | <b>0.73</b>  | 0.16746 |
| STM3198   | STM3198 | putative inner membrane protein                    | <b>-0.26</b> | 0.55482 |
| STM3198   | STM3198 | putative inner membrane protein                    | <b>0.83</b>  | 0.24520 |

|           |         |                                                         |              |         |
|-----------|---------|---------------------------------------------------------|--------------|---------|
| STM3199   | yqiK    | hypothetical protein STM3199                            | <b>0.22</b>  | 0.56877 |
| STM3199   | yqiK    | hypothetical protein STM3199                            | <b>0.50</b>  | 0.33971 |
| STM3200   | rfaE    | putative ADP-L-glycero-D-manno-heptose synthase         | <b>-0.61</b> | 0.17139 |
| STM3200   | rfaE    | putative ADP-L-glycero-D-manno-heptose synthase         | <b>0.07</b>  | 0.86895 |
| STM3201   | glnE    | adenylyl transferase for glutamine synthetase           | <b>-0.49</b> | 0.42277 |
| STM3201   | glnE    | adenylyl transferase for glutamine synthetase           | <b>-0.08</b> | 0.89808 |
| STM3202   | ygiF    | putative cytoplasmic protein                            | <b>-0.04</b> | 0.95397 |
| STM3202   | ygiF    | putative cytoplasmic protein                            | <b>0.40</b>  | 0.33710 |
| STM3203   | ygiM    | hypothetical protein STM3203                            | <b>-0.05</b> | 0.92183 |
| STM3203   | ygiM    | hypothetical protein STM3203                            | <b>0.68</b>  | 0.14154 |
| STM3204   | cca     | tRNA nucleotidyl transferase                            | <b>0.01</b>  | 0.99182 |
| STM3204   | cca     | tRNA nucleotidyl transferase                            | <b>-0.49</b> | 0.30432 |
| STM3205   | uppP    | undecaprenyl pyrophosphate phosphatase                  | <b>-0.15</b> | 0.73153 |
| STM3205   | uppP    | undecaprenyl pyrophosphate phosphatase                  | <b>-0.06</b> | 0.89487 |
| STM3206   | folB    | dihydroneopterin aldolase/dihydroneopterin triphosphate | <b>-0.15</b> | 0.79096 |
| STM3206   | folB    | dihydroneopterin aldolase/dihydroneopterin triphosphate | <b>-0.21</b> | 0.54656 |
| STM3207   | ygiH    | hypothetical protein STM3207                            | <b>-0.47</b> | 0.24376 |
| STM3207   | ygiH    | hypothetical protein STM3207                            | <b>0.00</b>  | 0.99735 |
| STM3208   | gcp     | putative O-sialoglycoprotein endopeptidase              | <b>-0.35</b> | 0.40185 |
| STM3208   | gcp     | putative O-sialoglycoprotein endopeptidase              | <b>0.57</b>  | 0.21111 |
| STM3209   | rpsU    | 30S ribosomal protein S21                               | <b>-0.24</b> | 0.52383 |
| STM3209   | rpsU    | 30S ribosomal protein S21                               | <b>-0.12</b> | 0.76811 |
| STM3210   | dnaG    | DNA primase                                             | <b>0.27</b>  | 0.44186 |
| STM3210   | dnaG    | DNA primase                                             | <b>0.39</b>  | 0.47479 |
| STM3211,S | rpoD    | RNA polymerase sigma factor                             | <b>-0.07</b> | 0.87208 |
| STM3211,S | rpoD    | RNA polymerase sigma factor                             | <b>-0.04</b> | 0.95497 |
| STM3212   | mug     | G/U mismatch-specific DNA glycosylase                   | <b>-0.43</b> | 0.32172 |
| STM3212   | mug     | G/U mismatch-specific DNA glycosylase                   | <b>-0.09</b> | 0.82384 |
| STM3213   | ileX    | STM3213                                                 | <b>0.24</b>  | 0.65353 |
| STM3213   | ileX    | STM3213                                                 | <b>0.32</b>  | 0.50759 |
| STM3214   | yqjH    | putative transporter                                    | <b>-0.31</b> | 0.37310 |
| STM3214   | yqjH    | putative transporter                                    | <b>0.11</b>  | 0.78755 |
| STM3215   | yqjI    | putative transcriptional regulator                      | <b>-0.05</b> | 0.90318 |
| STM3215   | yqjI    | putative transcriptional regulator                      | <b>0.14</b>  | 0.74779 |
| STM3216   | STM3216 | putative methyl-accepting chemotaxis protein            | <b>0.12</b>  | 0.94990 |
| STM3216   | STM3216 | putative methyl-accepting chemotaxis protein            | <b>-0.71</b> | 0.49046 |
| STM3217   | aer     | aerotaxis sensor receptor                               | <b>0.07</b>  | 0.86873 |
| STM3217   | aer     | aerotaxis sensor receptor                               | <b>0.30</b>  | 0.42774 |
| STM3218   | oat     | putative acetylornithine aminotransferase               | <b>0.60</b>  | 0.19398 |
| STM3218   | oat     | putative acetylornithine aminotransferase               | <b>0.52</b>  | 0.35955 |
| STM3219   | fadH    | 2,4-dieonyl-CoA reductase                               | <b>-0.36</b> | 0.35564 |
| STM3219   | fadH    | 2,4-dieonyl-CoA reductase                               | <b>0.15</b>  | 0.89405 |
| STM3220   | ygiO    | putative methyltransferase                              | <b>-0.55</b> | 0.19852 |
| STM3220   | ygiO    | putative methyltransferase                              | <b>0.07</b>  | 0.89730 |
| STM3221   | ygiP    | putative metal-dependent hydrolase                      | <b>-0.30</b> | 0.41154 |
| STM3221   | ygiP    | putative metal-dependent hydrolase                      | <b>0.02</b>  | 0.96653 |
| STM3222   | ygiQ    | putative integral membrane protein                      | <b>0.06</b>  | 0.93596 |
| STM3222   | ygiQ    | putative integral membrane protein                      | <b>1.02</b>  | 0.32984 |
| STM3223   | ygiR    | putative dehydrogenase                                  | <b>-0.19</b> | 0.76043 |
| STM3223   | ygiR    | putative dehydrogenase                                  | <b>0.39</b>  | 0.49336 |
| STM3224   | ygiT    | putative tellurite resistance protein                   | <b>-0.11</b> | 0.80406 |
| STM3224   | ygiT    | putative tellurite resistance protein                   | <b>0.20</b>  | 0.61538 |
| STM3225   | ygiU    | putative dicarboxylate permease                         | <b>-0.04</b> | 0.92637 |
| STM3225   | ygiU    | putative dicarboxylate permease                         | <b>-0.01</b> | 0.98095 |
| STM3226   | yqiA    | hypothetical protein STM3226                            | <b>-0.02</b> | 0.97090 |
| STM3226   | yqiA    | hypothetical protein STM3226                            | <b>0.51</b>  | 0.23452 |
| STM3227   | yqiB    | putative outer membrane protein                         | <b>-0.48</b> | 0.22621 |
| STM3227   | yqiB    | putative outer membrane protein                         | <b>0.19</b>  | 0.57512 |
| STM3228   | yqiC    | putative periplasmic protein                            | <b>-0.61</b> | 0.18622 |
| STM3228   | yqiC    | putative periplasmic protein                            | <b>-0.13</b> | 0.75077 |
| STM3229   | yqiD    | putative inner membrane protein                         | <b>-0.67</b> | 0.18464 |
| STM3229   | yqiD    | putative inner membrane protein                         | <b>-0.53</b> | 0.23114 |
| STM3230   | yqiE    | putative inner membrane protein                         | <b>-0.87</b> | 0.11224 |

|         |         |                                                                    |              |         |
|---------|---------|--------------------------------------------------------------------|--------------|---------|
| STM3230 | yqjE    | putative inner membrane protein                                    | <b>-0.22</b> | 0.68308 |
| STM3231 | yqjK    | putative inner membrane protein                                    | <b>-0.52</b> | 0.35010 |
| STM3231 | yqjK    | putative inner membrane protein                                    | <b>-0.59</b> | 0.17139 |
| STM3232 | yqjF    | hypothetical protein STM3232                                       | <b>0.08</b>  | 0.85312 |
| STM3232 | yqjF    | hypothetical protein STM3232                                       | <b>0.66</b>  | 0.30702 |
| STM3233 | yqjG    | putative glutathione S-transferase                                 | <b>-0.39</b> | 0.32016 |
| STM3233 | yqjG    | putative glutathione S-transferase                                 | <b>0.21</b>  | 0.68414 |
| STM3234 | yhaH    | putative inner membrane protein                                    | <b>0.02</b>  | 0.98539 |
| STM3234 | yhaH    | putative inner membrane protein                                    | <b>-0.10</b> | 0.84263 |
| STM3235 | yhaJ    | putative transcriptional regulator                                 | <b>-0.88</b> | 0.11018 |
| STM3235 | yhaJ    | putative transcriptional regulator                                 | <b>-0.02</b> | 0.96692 |
| STM3236 | yhaK    | putative cytoplasmic protein                                       | <b>-0.55</b> | 0.31280 |
| STM3236 | yhaK    | putative cytoplasmic protein                                       | <b>0.10</b>  | 0.89266 |
| STM3237 | yhaL    | putative cytoplasmic protein                                       | <b>0.35</b>  | 0.44997 |
| STM3237 | yhaL    | putative cytoplasmic protein                                       | <b>0.78</b>  | 0.36856 |
| STM3238 | yhaN    | putative inner membrane protein                                    | <b>-0.62</b> | 0.16902 |
| STM3238 | yhaN    | putative inner membrane protein                                    | <b>0.23</b>  | 0.62861 |
| STM3239 | yhaO    | putative transport protein                                         | <b>-0.29</b> | 0.61285 |
| STM3239 | yhaO    | putative transport protein                                         | <b>0.12</b>  | 0.84982 |
| STM3240 | tdcG    | L-serine deaminase                                                 | <b>0.54</b>  | 0.31280 |
| STM3240 | tdcG    | L-serine deaminase                                                 | <b>0.52</b>  | 0.55661 |
| STM3241 | tdcE    | pyruvate formate-lyase 4/2-ketobutyrate formate-lyase              | <b>0.43</b>  | 0.41913 |
| STM3241 | tdcE    | pyruvate formate-lyase 4/2-ketobutyrate formate-lyase              | <b>0.24</b>  | 0.64929 |
| STM3242 | tdcD    | acetate/propionate kinase                                          | <b>0.36</b>  | 0.35619 |
| STM3242 | tdcD    | acetate/propionate kinase                                          | <b>0.65</b>  | 0.29044 |
| STM3243 | tdcC    | L-threonine/L-serine permease                                      | <b>0.10</b>  | 0.89410 |
| STM3243 | tdcC    | L-threonine/L-serine permease                                      | <b>0.23</b>  | 0.55656 |
| STM3244 | tdcB    | threonine dehydratase                                              | <b>0.24</b>  | 0.52391 |
| STM3244 | tdcB    | threonine dehydratase                                              | <b>1.16</b>  | 0.15276 |
| STM3245 | tdcA    | transcriptional activator                                          | <b>-0.04</b> | 0.95855 |
| STM3245 | tdcA    | transcriptional activator                                          | <b>0.28</b>  | 0.56303 |
| STM3247 | garK    | glycerate kinase                                                   | <b>-0.59</b> | 0.29912 |
| STM3247 | garK    | glycerate kinase                                                   | <b>-0.19</b> | 0.78363 |
| STM3248 | garR    | tartronate semialdehyde reductase                                  | <b>0.16</b>  | 0.79982 |
| STM3248 | garR    | tartronate semialdehyde reductase                                  | <b>-0.16</b> | 0.82637 |
| STM3249 | garL    | 2-dehydro-3-deoxy-galactarate aldolase                             | <b>-0.09</b> | 0.87019 |
| STM3249 | garL    | 2-dehydro-3-deoxy-galactarate aldolase                             | <b>0.33</b>  | 0.46629 |
| STM3250 | garD    | galactarate dehydrogenase                                          | <b>-0.71</b> | 0.32673 |
| STM3250 | garD    | galactarate dehydrogenase                                          | <b>-0.22</b> | 0.59820 |
| STM3251 | STM3251 | putative sugar kinase                                              | <b>-0.09</b> | 0.88928 |
| STM3251 | STM3251 | putative sugar kinase                                              | <b>0.62</b>  | 0.19142 |
| STM3252 | agaR    | Aga operon transcriptional repressor                               | <b>0.06</b>  | 0.91937 |
| STM3252 | agaR    | Aga operon transcriptional repressor                               | <b>0.50</b>  | 0.22063 |
| STM3253 | STM3253 | tagatose 1,6-diphosphate aldolase                                  | <b>-0.29</b> | 0.69833 |
| STM3253 | STM3253 | tagatose 1,6-diphosphate aldolase                                  | <b>0.33</b>  | 0.58934 |
| STM3254 | STM3254 | putative fructose-1-phosphate kinase                               | <b>0.16</b>  | 0.79134 |
| STM3254 | STM3254 | putative fructose-1-phosphate kinase                               | <b>0.04</b>  | 0.94965 |
| STM3255 | STM3255 | putative phosphotransferase system fructose-specific component IIB | <b>-0.64</b> | 0.26910 |
| STM3255 | STM3255 | putative phosphotransferase system fructose-specific component IIB | <b>0.32</b>  | 0.73017 |
| STM3256 | STM3256 | putative phosphotransferase system mannitol/fructose-specific IIA  | <b>-0.08</b> | 0.89979 |
| STM3256 | STM3256 | putative phosphotransferase system mannitol/fructose-specific IIA  | <b>-0.32</b> | 0.67363 |
| STM3257 | STM3257 | putative tagatose 6-phosphate kinase 1                             | <b>-1.08</b> | 0.12009 |
| STM3257 | STM3257 | putative tagatose 6-phosphate kinase 1                             | <b>0.09</b>  | 0.90136 |
| STM3258 | STM3258 | galactitol-specific enzyme IIA                                     | <b>0.39</b>  | 0.31929 |
| STM3258 | STM3258 | galactitol-specific enzyme IIA                                     | <b>0.83</b>  | 0.22358 |
| STM3259 | STM3259 | PTS family galactitol-specific enzyme IIB                          | <b>-0.25</b> | 0.62095 |
| STM3259 | STM3259 | PTS family galactitol-specific enzyme IIB                          | <b>0.03</b>  | 0.94360 |
| STM3260 | STM3260 | PTS family galactitol-specific enzyme IIC                          | <b>-0.15</b> | 0.75544 |
| STM3260 | STM3260 | PTS family galactitol-specific enzyme IIC                          | <b>0.05</b>  | 0.94050 |

|           |         |                                                         |              |         |
|-----------|---------|---------------------------------------------------------|--------------|---------|
| STM3261   | STM3261 | galactitol-1-phosphate dehydrogenase                    | <b>-0.11</b> | 0.81697 |
| STM3261   | STM3261 | galactitol-1-phosphate dehydrogenase                    | <b>0.68</b>  | 0.16534 |
| STM3262   | STM3262 | galactitol utilization operon transcriptional repressor | <b>-0.43</b> | 0.41024 |
| STM3262   | STM3262 | galactitol utilization operon transcriptional repressor | <b>-0.03</b> | 0.97660 |
| STM3263   | yraL    | putative methyltransferase                              | <b>-0.02</b> | 0.98539 |
| STM3263   | yraL    | putative methyltransferase                              | <b>0.02</b>  | 0.98555 |
| STM3264   | yraM    | putative transglycosylase                               | <b>-0.28</b> | 0.46717 |
| STM3264   | yraM    | putative transglycosylase                               | <b>0.61</b>  | 0.35593 |
| STM3265   | yraN    | hypothetical protein STM3265                            | <b>-0.44</b> | 0.27312 |
| STM3265   | yraN    | hypothetical protein STM3265                            | <b>0.18</b>  | 0.64518 |
| STM3266   | yraO    | putative phosphoheptose isomerase                       | <b>0.06</b>  | 0.90462 |
| STM3266   | yraO    | putative phosphoheptose isomerase                       | <b>0.14</b>  | 0.70229 |
| STM3267   | yraP    | putative periplasmic protein                            | <b>-0.08</b> | 0.85168 |
| STM3267   | yraP    | putative periplasmic protein                            | <b>0.25</b>  | 0.62023 |
| STM3268   | yraR    | putative nucleoside-diphosphate-sugar epimerase         | <b>-0.21</b> | 0.83855 |
| STM3268   | yraR    | putative nucleoside-diphosphate-sugar epimerase         | <b>-0.21</b> | 0.71515 |
| STM3269   | yhbO    | putative intracellular proteinase                       | <b>-0.27</b> | 0.53840 |
| STM3269   | yhbO    | putative intracellular proteinase                       | <b>-0.17</b> | 0.78534 |
| STM3270   | yhbP    | hypothetical protein STM3270                            | <b>-0.32</b> | 0.51450 |
| STM3270   | yhbP    | hypothetical protein STM3270                            | <b>0.18</b>  | 0.74528 |
| STM3271   | yhbQ    | hypothetical protein STM3271                            | <b>-0.12</b> | 0.78824 |
| STM3271   | yhbQ    | hypothetical protein STM3271                            | <b>-0.04</b> | 0.94417 |
| STM3272   | yhbS    | putative transport protein                              | <b>0.24</b>  | 0.63464 |
| STM3272   | yhbS    | putative transport protein                              | <b>0.79</b>  | 0.26378 |
| STM3273   | yhbT    | putative lipid carrier protein                          | <b>-0.12</b> | 0.83718 |
| STM3273   | yhbT    | putative lipid carrier protein                          | <b>0.54</b>  | 0.18562 |
| STM3274   | yhbU    | putative protease                                       | <b>-0.12</b> | 0.78909 |
| STM3274   | yhbU    | putative protease                                       | <b>0.28</b>  | 0.51300 |
| STM3275,S | yhbV    | putative protease                                       | <b>-0.23</b> | 0.61205 |
| STM3275,S | yhbV    | putative protease                                       | <b>1.10</b>  | 0.19425 |
| STM3276   | yhbW    | putative alkanal monooxygenase                          | <b>-0.29</b> | 0.45423 |
| STM3276   | yhbW    | putative alkanal monooxygenase                          | <b>0.04</b>  | 0.95059 |
| STM3277   | STM3277 | putative inner membrane protein                         | <b>-0.55</b> | 0.30813 |
| STM3277   | STM3277 | putative inner membrane protein                         | <b>0.78</b>  | 0.40190 |
| STM3278   | STM3278 | putative cytoplasmic protein                            | <b>-0.56</b> | 0.31280 |
| STM3278   | STM3278 | putative cytoplasmic protein                            | <b>-0.12</b> | 0.85152 |
| STM3279   | mtr     | tryptophan-specific transport protein                   | <b>0.05</b>  | 0.93767 |
| STM3279   | mtr     | tryptophan-specific transport protein                   | <b>-0.05</b> | 0.91585 |
| STM3280,S | deaD    | cysteine sulfinatase desulfinate                        | <b>-0.35</b> | 0.50700 |
| STM3280,S | deaD    | cysteine sulfinatase desulfinate                        | <b>-0.20</b> | 0.77967 |
| STM3281   | nlpl    | lipoprotein                                             | <b>-0.15</b> | 0.74374 |
| STM3281   | nlpl    | lipoprotein                                             | <b>-0.17</b> | 0.68277 |
| STM3282   | pnpl    | polynucleotide phosphorylase                            | <b>0.08</b>  | 0.86654 |
| STM3282   | pnpl    | polynucleotide phosphorylase                            | <b>0.47</b>  | 0.42580 |
| STM3283   | rpsO    | 30S ribosomal protein S15                               | <b>-0.36</b> | 0.35325 |
| STM3283   | rpsO    | 30S ribosomal protein S15                               | <b>-0.71</b> | 0.20916 |
| STM3284   | truB    | tRNA pseudouridine synthase B                           | <b>-0.15</b> | 0.70048 |
| STM3284   | truB    | tRNA pseudouridine synthase B                           | <b>0.06</b>  | 0.89979 |
| STM3285   | rbfA    | ribosome-binding factor A                               | <b>-0.35</b> | 0.42735 |
| STM3285   | rbfA    | ribosome-binding factor A                               | <b>0.57</b>  | 0.18265 |
| STM3286   | infB    | translation initiation factor IF-2                      | <b>0.24</b>  | 0.84514 |
| STM3286   | infB    | translation initiation factor IF-2                      | <b>-0.07</b> | 0.86680 |
| STM3287   | nusA    | transcription elongation factor NusA                    | <b>0.06</b>  | 0.92262 |
| STM3287   | nusA    | transcription elongation factor NusA                    | <b>0.45</b>  | 0.42591 |
| STM3288   | yhbC    | hypothetical protein STM3288                            | <b>0.50</b>  | 0.30748 |
| STM3288   | yhbC    | hypothetical protein STM3288                            | <b>0.61</b>  | 0.30018 |
| STM3289   | metY    | STM3289                                                 | <b>-0.61</b> | 0.33452 |
| STM3289   | metY    | STM3289                                                 | <b>-0.35</b> | 0.56129 |
| STM3289   | metY    | STM3289                                                 | <b>-0.51</b> | 0.26164 |
| STM3289   | metY    | STM3289                                                 | <b>-0.07</b> | 0.89657 |
| STM3289   | metY    | STM3289                                                 | <b>0.04</b>  | 0.95650 |
| STM3289   | metY    | STM3289                                                 | <b>-0.19</b> | 0.74374 |
| STM3290,S | argG    | argininosuccinate synthase                              | <b>-0.48</b> | 0.29539 |

|           |         |                                                      |              |         |
|-----------|---------|------------------------------------------------------|--------------|---------|
| STM3290,S | argG    | argininosuccinate synthase                           | <b>0.30</b>  | 0.49117 |
| STM3291   | STM3291 | putative cytoplasmic protein                         | <b>-0.02</b> | 0.96684 |
| STM3291   | STM3291 | putative cytoplasmic protein                         | <b>0.43</b>  | 0.43219 |
| STM3292   | leuU    | STM3292                                              | <b>-0.36</b> | 0.37507 |
| STM3292   | leuU    | STM3292                                              | <b>-0.37</b> | 0.44552 |
| STM3293   | secG    | protein-export membrane protein                      | <b>-0.55</b> | 0.36341 |
| STM3293   | secG    | protein-export membrane protein                      | <b>-0.26</b> | 0.47455 |
| STM3294   | mrsA    | phosphoglucosamine mutase                            | <b>-0.30</b> | 0.43890 |
| STM3294   | mrsA    | phosphoglucosamine mutase                            | <b>0.13</b>  | 0.73859 |
| STM3295   | folP    | 7,8-dihydropteroate synthase                         | <b>-0.35</b> | 0.41996 |
| STM3295   | folP    | 7,8-dihydropteroate synthase                         | <b>-0.08</b> | 0.85012 |
| STM3296   | hflB    | ATP-dependent zinc-metallo protease                  | <b>-0.34</b> | 0.52101 |
| STM3296   | hflB    | ATP-dependent zinc-metallo protease                  | <b>-0.24</b> | 0.64929 |
| STM3297   | ftsJ    | 23S rRNA methyltransferase                           | <b>0.06</b>  | 0.87740 |
| STM3297   | ftsJ    | 23S rRNA methyltransferase                           | <b>0.03</b>  | 0.93841 |
| STM3298,S | yhbY    | putative RNA-binding protein                         | <b>-0.41</b> | 0.30813 |
| STM3298,S | yhbY    | putative RNA-binding protein                         | <b>0.28</b>  | 0.55482 |
| STM3299   | greA    | transcription elongation factor GreA                 | <b>-0.25</b> | 0.48388 |
| STM3299   | greA    | transcription elongation factor GreA                 | <b>-0.01</b> | 0.99232 |
| STM3300   | dacB    | D-alanyl-D-alanine carboxypeptidase                  | <b>-0.23</b> | 0.59820 |
| STM3300   | dacB    | D-alanyl-D-alanine carboxypeptidase                  | <b>0.39</b>  | 0.36270 |
| STM3301   | yhbZ    | putative GTP-binding protein                         | <b>-0.19</b> | 0.58439 |
| STM3301   | yhbZ    | putative GTP-binding protein                         | <b>0.22</b>  | 0.62988 |
| STM3303   | rpmA    | 50S ribosomal protein L27                            | <b>0.07</b>  | 0.88288 |
| STM3303   | rpmA    | 50S ribosomal protein L27                            | <b>-0.05</b> | 0.90502 |
| STM3303   | rpmA    | 50S ribosomal protein L27                            | <b>0.31</b>  | 0.42591 |
| STM3303   | rpmA    | 50S ribosomal protein L27                            | <b>0.29</b>  | 0.41153 |
| STM3305   | ispB    | octaprenyl diphosphate synthase                      | <b>0.00</b>  | 0.99997 |
| STM3305   | ispB    | octaprenyl diphosphate synthase                      | <b>0.21</b>  | 0.56179 |
| STM3306   | nlp     | transcriptional regulator                            | <b>-0.11</b> | 0.80960 |
| STM3306   | nlp     | transcriptional regulator                            | <b>0.22</b>  | 0.66460 |
| STM3307   | murA    | UDP-N-acetylglucosamine 1-carboxyvinyltransferase    | <b>-0.14</b> | 0.76538 |
| STM3307   | murA    | UDP-N-acetylglucosamine 1-carboxyvinyltransferase    | <b>0.43</b>  | 0.36856 |
| STM3308   | yrbA    | putative transcriptional regulator                   | <b>-0.17</b> | 0.72197 |
| STM3308   | yrbA    | putative transcriptional regulator                   | <b>-0.33</b> | 0.43341 |
| STM3308   | yrbA    | putative transcriptional regulator                   | <b>-0.15</b> | 0.69882 |
| STM3308   | yrbA    | putative transcriptional regulator                   | <b>0.33</b>  | 0.35824 |
| STM3309   | yrbB    | hypothetical protein STM3309                         | <b>-0.31</b> | 0.43577 |
| STM3309   | yrbB    | hypothetical protein STM3309                         | <b>-0.02</b> | 0.96228 |
| STM3310   | yrbC    | putative transport protein                           | <b>-0.37</b> | 0.30605 |
| STM3310   | yrbC    | putative transport protein                           | <b>-0.12</b> | 0.74436 |
| STM3311   | yrbD    | putative transport protein                           | <b>-0.02</b> | 0.97508 |
| STM3311   | yrbD    | putative transport protein                           | <b>0.36</b>  | 0.39861 |
| STM3312   | yrbE    | putative transport protein                           | <b>0.00</b>  | 0.99938 |
| STM3312   | yrbE    | putative transport protein                           | <b>-0.04</b> | 0.93367 |
| STM3313   | yrbF    | putative transport protein                           | <b>0.06</b>  | 0.88998 |
| STM3313   | yrbF    | putative transport protein                           | <b>0.38</b>  | 0.38049 |
| STM3314   | yrbG    | Na/Ca transport protein                              | <b>0.13</b>  | 0.77347 |
| STM3314   | yrbG    | Na/Ca transport protein                              | <b>0.14</b>  | 0.75424 |
| STM3315   | yrbH    | putative sugar phosphate isomerase                   | <b>0.18</b>  | 0.68070 |
| STM3315   | yrbH    | putative sugar phosphate isomerase                   | <b>0.12</b>  | 0.75538 |
| STM3316   | yrbI    | 3-deoxy-D-manno-octulosonate 8-phosphate phosphatase | <b>-0.44</b> | 0.42654 |
| STM3316   | yrbI    | 3-deoxy-D-manno-octulosonate 8-phosphate phosphatase | <b>0.06</b>  | 0.88561 |
| STM3317   | yrbK    | putative inner membrane protein                      | <b>0.10</b>  | 0.85636 |
| STM3317   | yrbK    | putative inner membrane protein                      | <b>0.46</b>  | 0.39186 |
| STM3318   | yhbN    | putative transport protein                           | <b>-0.17</b> | 0.67137 |
| STM3318   | yhbN    | putative transport protein                           | <b>0.76</b>  | 0.16902 |
| STM3319   | yhbG    | putative transport protein                           | <b>-0.48</b> | 0.38080 |
| STM3319   | yhbG    | putative transport protein                           | <b>0.06</b>  | 0.91025 |
| STM3320   | rpoN    | DNA-directed RNA polymerase subunit N                | <b>0.11</b>  | 0.81455 |
| STM3320   | rpoN    | DNA-directed RNA polymerase subunit N                | <b>0.18</b>  | 0.64335 |

|         |         |                                           |              |         |
|---------|---------|-------------------------------------------|--------------|---------|
| STM3321 | yhbH    | putative sigma N modulation factor        | <b>-0.21</b> | 0.53459 |
| STM3321 | yhbH    | putative sigma N modulation factor        | <b>0.30</b>  | 0.59881 |
| STM3322 | ptsN    | sugar-specific PTS family enzyme IIA      | <b>0.20</b>  | 0.64975 |
| STM3322 | ptsN    | sugar-specific PTS family enzyme IIA      | <b>0.18</b>  | 0.71275 |
| STM3323 | yhbJ    | hypothetical protein STM3323              | <b>0.18</b>  | 0.71058 |
| STM3323 | yhbJ    | hypothetical protein STM3323              | <b>0.33</b>  | 0.52861 |
| STM3324 | ptsO    | phosphocarrier protein HPr-like NPr       | <b>0.04</b>  | 0.96627 |
| STM3324 | ptsO    | phosphocarrier protein HPr-like NPr       | <b>0.23</b>  | 0.56285 |
| STM3325 | yrbL    | putative cytoplasmic protein              | <b>-0.41</b> | 0.40721 |
| STM3325 | yrbL    | putative cytoplasmic protein              | <b>-0.20</b> | 0.71367 |
|         |         | monofunctional biosynthetic peptidoglycan |              |         |
| STM3326 | mtgA    | transglycosylase                          | <b>0.05</b>  | 0.91170 |
|         |         | monofunctional biosynthetic peptidoglycan |              |         |
| STM3326 | mtgA    | transglycosylase                          | <b>-0.01</b> | 0.98840 |
| STM3327 | yhbL    | sigma cross-reacting protein 27A          | <b>-0.62</b> | 0.17603 |
| STM3327 | yhbL    | sigma cross-reacting protein 27A          | <b>0.13</b>  | 0.73908 |
| STM3328 | arcB    | sensory histidine kinase                  | <b>-0.66</b> | 0.65762 |
| STM3328 | arcB    | sensory histidine kinase                  | <b>0.37</b>  | 0.50736 |
| STM3329 | yhcC    | putative FeS oxidoreductase               | <b>-0.23</b> | 0.64727 |
| STM3329 | yhcC    | putative FeS oxidoreductase               | <b>-0.13</b> | 0.78829 |
| STM3330 | gltB    | glutamate synthase large subunit          | <b>-0.10</b> | 0.83100 |
| STM3330 | gltB    | glutamate synthase large subunit          | <b>0.25</b>  | 0.53459 |
| STM3331 | gltD    | glutamate synthase small subunit          | <b>-0.11</b> | 0.90587 |
| STM3331 | gltD    | glutamate synthase small subunit          | <b>-0.20</b> | 0.63148 |
| STM3332 | yhcG    | putative cytoplasmic protein              | <b>-0.70</b> | 0.20285 |
| STM3332 | yhcG    | putative cytoplasmic protein              | <b>0.56</b>  | 0.22602 |
| STM3333 | STM3333 | putative purine-cytosine permease         | <b>-0.48</b> | 0.40412 |
| STM3333 | STM3333 | putative purine-cytosine permease         | <b>-0.31</b> | 0.62174 |
| STM3334 | STM3334 | cytosine deaminase                        | <b>-0.33</b> | 0.48724 |
| STM3334 | STM3334 | cytosine deaminase                        | <b>0.33</b>  | 0.38961 |
| STM3335 | yhcH    | putative cytoplasmic protein              | <b>-0.21</b> | 0.72976 |
| STM3335 | yhcH    | putative cytoplasmic protein              | <b>0.10</b>  | 0.88198 |
| STM3336 | nanK    | N-acetylmannosamine kinase                | <b>0.20</b>  | 0.76720 |
| STM3336 | nanK    | N-acetylmannosamine kinase                | <b>0.41</b>  | 0.26261 |
| STM3337 | nanE    | putative ManNAc-6P epimerase              | <b>0.07</b>  | 0.93023 |
| STM3337 | nanE    | putative ManNAc-6P epimerase              | <b>1.39</b>  | 0.02875 |
| STM3338 | nanT    | putative sialic acid transporter          | <b>0.31</b>  | 0.46148 |
| STM3338 | nanT    | putative sialic acid transporter          | <b>0.93</b>  | 0.16534 |
| STM3339 | nanA    | N-acetylneuraminate lyase                 | <b>-0.54</b> | 0.31919 |
| STM3339 | nanA    | N-acetylneuraminate lyase                 | <b>0.05</b>  | 0.92914 |
| STM3340 | yhcK    | transcriptional regulator NanR            | <b>-0.20</b> | 0.57843 |
| STM3340 | yhcK    | transcriptional regulator NanR            | <b>-0.31</b> | 0.50719 |
| STM3341 | sspB    | stringent starvation protein B            | <b>-0.29</b> | 0.55892 |
| STM3341 | sspB    | stringent starvation protein B            | <b>0.12</b>  | 0.78641 |
| STM3342 | sspA    | stringent starvation protein A            | <b>-0.07</b> | 0.86233 |
| STM3342 | sspA    | stringent starvation protein A            | <b>0.04</b>  | 0.92637 |
| STM3343 | STM3343 | putative cytoplasmic protein              | <b>0.12</b>  | 0.81228 |
| STM3343 | STM3343 | putative cytoplasmic protein              | <b>0.29</b>  | 0.42409 |
| STM3344 | rpsI    | 30S ribosomal protein S9                  | <b>-0.10</b> | 0.85382 |
| STM3344 | rpsI    | 30S ribosomal protein S9                  | <b>0.18</b>  | 0.71113 |
| STM3345 | rplM    | 50S ribosomal protein L13                 | <b>0.19</b>  | 0.65966 |
| STM3345 | rplM    | 50S ribosomal protein L13                 | <b>0.88</b>  | 0.11690 |
| STM3346 | yhcM    | putative ATPase                           | <b>0.02</b>  | 0.98090 |
| STM3346 | yhcM    | putative ATPase                           | <b>0.30</b>  | 0.58890 |
| STM3347 | yhcB    | putative periplasmic protein              | <b>-0.47</b> | 0.31139 |
| STM3347 | yhcB    | putative periplasmic protein              | <b>0.04</b>  | 0.93506 |
| STM3348 | degQ    | serine endoprotease                       | <b>-0.10</b> | 0.82384 |
| STM3348 | degQ    | serine endoprotease                       | <b>0.12</b>  | 0.87826 |
| STM3349 | degS    | periplasmic serine endoprotease           | <b>-0.12</b> | 0.86174 |
| STM3349 | degS    | periplasmic serine endoprotease           | <b>0.62</b>  | 0.22620 |
| STM3350 | STM3350 | putative inner membrane protein           | <b>-0.19</b> | 0.65674 |
| STM3350 | STM3350 | putative inner membrane protein           | <b>0.08</b>  | 0.87996 |

|         |         |                                                                   |              |         |
|---------|---------|-------------------------------------------------------------------|--------------|---------|
| STM3351 | oadB    | putative sodium ion pump oxaloacetate decarboxylase<br>beta chain | <b>-0.10</b> | 0.88198 |
| STM3351 | oadB    | putative sodium ion pump oxaloacetate decarboxylase<br>beta chain | <b>-0.33</b> | 0.55656 |
| STM3352 | oadA    | oxaloacetate decarboxylase                                        | <b>0.67</b>  | 0.65730 |
| STM3352 | oadA    | oxaloacetate decarboxylase                                        | <b>-0.36</b> | 0.64307 |
| STM3352 | oadA    | oxaloacetate decarboxylase                                        | <b>0.35</b>  | 0.49336 |
| STM3352 | oadA    | oxaloacetate decarboxylase                                        | <b>0.19</b>  | 0.61654 |
| STM3352 | oadA    | oxaloacetate decarboxylase                                        | <b>-0.01</b> | 0.98798 |
| STM3352 | oadA    | oxaloacetate decarboxylase                                        | <b>0.81</b>  | 0.17074 |
| STM3353 | oadG    | putative oxaloacetate decarboxylase subunit gamma                 | <b>0.03</b>  | 0.96202 |
| STM3353 | oadG    | putative oxaloacetate decarboxylase subunit gamma                 | <b>0.31</b>  | 0.56566 |
| STM3354 | STM3354 | L(+)-tartrate dehydratase                                         | <b>-0.66</b> | 0.24520 |
| STM3354 | STM3354 | L(+)-tartrate dehydratase                                         | <b>-0.36</b> | 0.42774 |
| STM3355 | STM3355 | tartrate dehydratase                                              | <b>0.08</b>  | 0.91790 |
| STM3355 | STM3355 | tartrate dehydratase                                              | <b>0.37</b>  | 0.46169 |
| STM3356 | STM3356 | putative cation transporter                                       | <b>-0.10</b> | 0.91183 |
| STM3356 | STM3356 | putative cation transporter                                       | <b>-0.09</b> | 0.95980 |
| STM3357 | STM3357 | putative regulatory protein                                       | <b>-0.10</b> | 0.84021 |
| STM3357 | STM3357 | putative regulatory protein                                       | <b>-0.06</b> | 0.91484 |
| STM3358 | STM3358 | putative regulatory protein                                       | <b>0.29</b>  | 0.42486 |
| STM3358 | STM3358 | putative regulatory protein                                       | <b>0.16</b>  | 0.78111 |
| STM3359 | mdh     | malate dehydrogenase                                              | <b>0.18</b>  | 0.69785 |
| STM3359 | mdh     | malate dehydrogenase                                              | <b>0.61</b>  | 0.20285 |
| STM3360 | argR    | arginine repressor                                                | <b>0.17</b>  | 0.71103 |
| STM3360 | argR    | arginine repressor                                                | <b>0.57</b>  | 0.25759 |
| STM3361 | yhcN    | putative outer membrane protein                                   | <b>-0.14</b> | 0.74354 |
| STM3361 | yhcN    | putative outer membrane protein                                   | <b>0.67</b>  | 0.18265 |
| STM3362 | STM3362 | putative periplasmic protein                                      | <b>-0.72</b> | 0.33833 |
| STM3362 | STM3362 | putative periplasmic protein                                      | <b>-0.13</b> | 0.79772 |
| STM3363 | yhcO    | putative cytoplasmic protein                                      | <b>-0.31</b> | 0.80096 |
| STM3363 | yhcO    | putative cytoplasmic protein                                      | <b>0.07</b>  | 0.91047 |
| STM3364 | yhcP    | putative inner membrane protein                                   | <b>-0.58</b> | 0.21747 |
| STM3364 | yhcP    | putative inner membrane protein                                   | <b>-0.02</b> | 0.96782 |
| STM3365 | yhcQ    | putative multidrug resistance protein                             | <b>-0.11</b> | 0.83443 |
| STM3365 | yhcQ    | putative multidrug resistance protein                             | <b>0.01</b>  | 0.99252 |
| STM3366 | yhcR    | putative inner membrane protein                                   | <b>-0.15</b> | 0.79037 |
| STM3366 | yhcR    | putative inner membrane protein                                   | <b>-0.26</b> | 0.67506 |
| STM3367 | yhcS    | putative transcriptional regulator                                | <b>-0.04</b> | 0.95815 |
| STM3367 | yhcS    | putative transcriptional regulator                                | <b>-0.04</b> | 0.95481 |
| STM3368 | tldD    | microcin B17-processing protein                                   | <b>-0.25</b> | 0.67097 |
| STM3368 | tldD    | microcin B17-processing protein                                   | <b>-0.09</b> | 0.87019 |
| STM3369 | yhdP    | putative protease                                                 | <b>-0.45</b> | 0.33452 |
| STM3369 | yhdP    | putative protease                                                 | <b>0.60</b>  | 0.35373 |
| STM3370 | cafA    | RNase G                                                           | <b>0.00</b>  | 0.99882 |
| STM3370 | cafA    | RNase G                                                           | <b>0.22</b>  | 0.55665 |
| STM3371 | maf     | Maf-like protein                                                  | <b>-0.22</b> | 0.55482 |
| STM3371 | maf     | Maf-like protein                                                  | <b>0.01</b>  | 0.97837 |
| STM3372 | mreD    | rod shape-determining protein                                     | <b>-0.13</b> | 0.76387 |
| STM3372 | mreD    | rod shape-determining protein                                     | <b>0.17</b>  | 0.67474 |
| STM3373 | mreC    | rod shape-determining protein                                     | <b>-0.33</b> | 0.49336 |
| STM3373 | mreC    | rod shape-determining protein                                     | <b>-0.27</b> | 0.53678 |
| STM3374 | mreB    | rod shape-determining protein                                     | <b>-0.38</b> | 0.35635 |
| STM3374 | mreB    | rod shape-determining protein                                     | <b>-0.31</b> | 0.62526 |
| STM3375 | yhdA    | putative diguanylate cyclase                                      | <b>-0.09</b> | 0.91170 |
| STM3375 | yhdA    | putative diguanylate cyclase                                      | <b>0.00</b>  | 0.99703 |
| STM3376 | yhdH    | putative oxidoreductase                                           | <b>-0.02</b> | 0.97117 |
| STM3376 | yhdH    | putative oxidoreductase                                           | <b>0.34</b>  | 0.41836 |
| STM3377 | STM3377 | hypothetical protein STM3377                                      | <b>0.30</b>  | 0.46629 |
| STM3377 | STM3377 | hypothetical protein STM3377                                      | <b>0.42</b>  | 0.29454 |
| STM3378 | STM3378 | hypothetical protein STM3378                                      | <b>0.24</b>  | 0.49336 |
| STM3378 | STM3378 | hypothetical protein STM3378                                      | <b>0.16</b>  | 0.70033 |
| STM3379 | accB    | acetyl-CoA carboxylase                                            | <b>0.09</b>  | 0.82443 |

|         |         |                                                     |              |         |
|---------|---------|-----------------------------------------------------|--------------|---------|
| STM3379 | accB    | acetyl-CoA carboxylase                              | <b>0.28</b>  | 0.53827 |
| STM3380 | accC    | acetyl-CoA carboxylase                              | <b>-0.51</b> | 0.24991 |
| STM3380 | accC    | acetyl-CoA carboxylase                              | <b>0.14</b>  | 0.73863 |
| STM3381 | yhdT    | putative inner membrane protein                     | <b>-0.34</b> | 0.40562 |
| STM3381 | yhdT    | putative inner membrane protein                     | <b>-0.29</b> | 0.59422 |
| STM3382 | panF    | sodium/pantothenate symporter                       | <b>0.04</b>  | 0.93506 |
| STM3382 | panF    | sodium/pantothenate symporter                       | <b>0.20</b>  | 0.61614 |
| STM3383 | prmA    | ribosomal protein L11 methyltransferase             | <b>-0.48</b> | 0.22153 |
| STM3383 | prmA    | ribosomal protein L11 methyltransferase             | <b>-0.07</b> | 0.89740 |
| STM3384 | yhdG    | possible dehydrogenase                              | <b>-0.35</b> | 0.35538 |
| STM3384 | yhdG    | possible dehydrogenase                              | <b>0.23</b>  | 0.60891 |
| STM3385 | fis     | DNA-binding protein Fis                             | <b>-0.87</b> | 0.12727 |
| STM3385 | fis     | DNA-binding protein Fis                             | <b>-0.32</b> | 0.53064 |
| STM3386 | yhdJ    | putative methyltransferase                          | <b>0.13</b>  | 0.74359 |
| STM3386 | yhdJ    | putative methyltransferase                          | <b>0.33</b>  | 0.38071 |
| STM3387 | yhdU    | putative periplasmic protein                        | <b>0.13</b>  | 0.73568 |
| STM3387 | yhdU    | putative periplasmic protein                        | <b>0.12</b>  | 0.76981 |
| STM3388 | STM3388 | putative signal transduction protein                | <b>-0.38</b> | 0.34051 |
| STM3388 | STM3388 | putative signal transduction protein                | <b>0.16</b>  | 0.81872 |
| STM3389 | envR    | transcriptional repressor                           | <b>-0.01</b> | 0.99182 |
| STM3389 | envR    | transcriptional repressor                           | <b>0.54</b>  | 0.42591 |
| STM3390 | acrE    | acriflavine resistance protein E precursor          | <b>-0.55</b> | 0.21919 |
| STM3390 | acrE    | acriflavine resistance protein E precursor          | <b>0.45</b>  | 0.38270 |
| STM3391 | acrF    | multidrug transport protein                         | <b>-0.33</b> | 0.54656 |
| STM3391 | acrF    | multidrug transport protein                         | <b>-0.02</b> | 0.97983 |
| STM3392 | yhdV    | putative outer membrane lipoprotein                 | <b>-0.44</b> | 0.57804 |
| STM3392 | yhdV    | putative outer membrane lipoprotein                 | <b>-0.52</b> | 0.39002 |
| STM3394 | thrV    | STM3394                                             | <b>-0.28</b> | 0.64525 |
| STM3394 | thrV    | STM3394                                             | <b>0.10</b>  | 0.82667 |
| STM3396 | rrlD    | STM3396                                             | <b>-0.08</b> | 0.89108 |
| STM3396 | rrlD    | STM3396                                             | <b>-0.02</b> | 0.98140 |
| STM3399 | yrdA    | putative ferripyochelin-binding protein             | <b>-0.48</b> | 0.29611 |
| STM3399 | yrdA    | putative ferripyochelin-binding protein             | <b>-0.07</b> | 0.92703 |
| STM3400 | yrdB    | putative periplasmic protein                        | <b>-0.14</b> | 0.76538 |
| STM3400 | yrdB    | putative periplasmic protein                        | <b>-0.30</b> | 0.62503 |
| STM3401 | aroE    | shikimate 5-dehydrogenase                           | <b>-0.53</b> | 0.31557 |
| STM3401 | aroE    | shikimate 5-dehydrogenase                           | <b>0.05</b>  | 0.91170 |
| STM3402 | yrnC    | putative dsRNA-binding protein                      | <b>-0.19</b> | 0.74268 |
| STM3402 | yrnC    | putative dsRNA-binding protein                      | <b>0.11</b>  | 0.81069 |
| STM3403 | yrnD    | putative DNA topoisomerase                          | <b>-0.11</b> | 0.83443 |
| STM3403 | yrnD    | putative DNA topoisomerase                          | <b>0.35</b>  | 0.39002 |
| STM3404 | smg     | hypothetical protein STM3404                        | <b>0.01</b>  | 0.98749 |
| STM3404 | smg     | hypothetical protein STM3404                        | <b>0.44</b>  | 0.34148 |
| STM3405 | smf     | putative competence protein                         | <b>0.12</b>  | 0.80374 |
| STM3405 | smf     | putative competence protein                         | <b>0.36</b>  | 0.44179 |
| STM3406 | def     | peptide deformylase                                 | <b>-0.09</b> | 0.86895 |
| STM3406 | def     | peptide deformylase                                 | <b>-0.06</b> | 0.92170 |
| STM3407 | fnt     | methionyl-tRNA formyltransferase                    | <b>-0.19</b> | 0.66310 |
| STM3407 | fnt     | methionyl-tRNA formyltransferase                    | <b>0.09</b>  | 0.82289 |
| STM3408 | sun     | putative rRNA methylase                             | <b>-0.32</b> | 0.58445 |
| STM3408 | sun     | putative rRNA methylase                             | <b>0.51</b>  | 0.23114 |
| STM3409 | trkA    | potassium transporter peripheral membrane component | <b>-0.20</b> | 0.66482 |
| STM3409 | trkA    | potassium transporter peripheral membrane component | <b>0.13</b>  | 0.77967 |
| STM3410 | mscL    | large-conductance mechanosensitive channel          | <b>0.02</b>  | 0.96785 |
| STM3410 | mscL    | large-conductance mechanosensitive channel          | <b>0.28</b>  | 0.46772 |
| STM3412 | zntR    | zinc-responsive transcriptional regulator           | <b>-0.35</b> | 0.37189 |
| STM3412 | zntR    | zinc-responsive transcriptional regulator           | <b>-0.13</b> | 0.77190 |
| STM3413 | yhdN    | putative cytoplasmic protein                        | <b>-0.24</b> | 0.63778 |
| STM3413 | yhdN    | putative cytoplasmic protein                        | <b>-0.56</b> | 0.40227 |
| STM3414 | rplQ    | 50S ribosomal protein L17                           | <b>-0.38</b> | 0.31912 |
| STM3414 | rplQ    | 50S ribosomal protein L17                           | <b>-0.30</b> | 0.42486 |
| STM3415 | rpoA    | DNA-directed RNA polymerase alpha subunit           | <b>-0.18</b> | 0.61341 |
| STM3415 | rpoA    | DNA-directed RNA polymerase alpha subunit           | <b>-0.12</b> | 0.73515 |

|           |      |                                                         |              |         |
|-----------|------|---------------------------------------------------------|--------------|---------|
| STM3416   | rpsD | 30S ribosomal protein S4                                | <b>0.08</b>  | 0.86190 |
| STM3416   | rpsD | 30S ribosomal protein S4                                | <b>0.07</b>  | 0.87359 |
| STM3417   | rpsK | 30S ribosomal protein S11                               | <b>0.21</b>  | 0.65983 |
| STM3417   | rpsK | 30S ribosomal protein S11                               | <b>0.25</b>  | 0.52543 |
| STM3418   | rpsM | 30S ribosomal protein S13                               | <b>0.18</b>  | 0.65025 |
| STM3418   | rpsM | 30S ribosomal protein S13                               | <b>-0.01</b> | 0.99182 |
| STM3420   | secY | preprotein translocase SecY                             | <b>-0.01</b> | 0.98539 |
| STM3420   | secY | preprotein translocase SecY                             | <b>0.04</b>  | 0.94004 |
| STM3421   | rplO | 50S ribosomal protein L15                               | <b>0.20</b>  | 0.61201 |
| STM3421   | rplO | 50S ribosomal protein L15                               | <b>0.29</b>  | 0.48668 |
| STM3422   | rpmD | 50S ribosomal protein L30                               | <b>0.15</b>  | 0.73653 |
| STM3422   | rpmD | 50S ribosomal protein L30                               | <b>0.16</b>  | 0.72247 |
| STM3423   | rpsE | 30S ribosomal protein S5                                | <b>-0.03</b> | 0.95218 |
| STM3423   | rpsE | 30S ribosomal protein S5                                | <b>0.58</b>  | 0.16425 |
| STM3424   | rplR | 50S ribosomal protein L18                               | <b>0.18</b>  | 0.66545 |
| STM3424   | rplR | 50S ribosomal protein L18                               | <b>0.18</b>  | 0.66589 |
| STM3425   | rplF | 50S ribosomal protein L6                                | <b>-0.02</b> | 0.97415 |
| STM3425   | rplF | 50S ribosomal protein L6                                | <b>0.15</b>  | 0.70570 |
| STM3426   | rpsH | 30S ribosomal protein S8                                | <b>0.28</b>  | 0.46267 |
| STM3426   | rpsH | 30S ribosomal protein S8                                | <b>0.03</b>  | 0.95532 |
| STM3426   | rpsH | 30S ribosomal protein S8                                | <b>0.23</b>  | 0.60693 |
| STM3426   | rpsH | 30S ribosomal protein S8                                | <b>0.11</b>  | 0.80100 |
| STM3427,S | rpsN | 30S ribosomal subunit protein S14                       | <b>0.01</b>  | 0.98239 |
| STM3427,S | rpsN | 30S ribosomal subunit protein S14                       | <b>0.45</b>  | 0.31036 |
| STM3428   | rplE | 50S ribosomal protein L5                                | <b>0.23</b>  | 0.58848 |
| STM3428   | rplE | 50S ribosomal protein L5                                | <b>0.20</b>  | 0.65130 |
| STM3429   | rplX | 50S ribosomal protein L24                               | <b>0.00</b>  | 0.99939 |
| STM3429   | rplX | 50S ribosomal protein L24                               | <b>-0.07</b> | 0.89542 |
| STM3429   | rplX | 50S ribosomal protein L24                               | <b>0.18</b>  | 0.61201 |
| STM3429   | rplX | 50S ribosomal protein L24                               | <b>-0.18</b> | 0.65974 |
| STM3430   | rplN | 50S ribosomal protein L14                               | <b>0.28</b>  | 0.56179 |
| STM3430   | rplN | 50S ribosomal protein L14                               | <b>0.36</b>  | 0.42764 |
| STM3430   | rplN | 50S ribosomal protein L14                               | <b>0.04</b>  | 0.93772 |
| STM3430   | rplN | 50S ribosomal protein L14                               | <b>0.23</b>  | 0.55008 |
| STM3431   | rpsQ | 30S ribosomal protein S17                               | <b>-0.06</b> | 0.88959 |
| STM3431   | rpsQ | 30S ribosomal protein S17                               | <b>-0.02</b> | 0.96018 |
| STM3432   | rpmC | 50S ribosomal protein L29                               | <b>-0.24</b> | 0.49064 |
| STM3432   | rpmC | 50S ribosomal protein L29                               | <b>-0.34</b> | 0.35366 |
| STM3433   | rplP | 50S ribosomal protein L16                               | <b>-0.03</b> | 0.94470 |
| STM3433   | rplP | 50S ribosomal protein L16                               | <b>0.05</b>  | 0.93083 |
| STM3434   | rpsC | 30S ribosomal protein S3                                | <b>-0.15</b> | 0.70122 |
| STM3434   | rpsC | 30S ribosomal protein S3                                | <b>0.59</b>  | 0.23772 |
| STM3435   | rplV | 50S ribosomal protein L22                               | <b>0.07</b>  | 0.86718 |
| STM3435   | rplV | 50S ribosomal protein L22                               | <b>0.39</b>  | 0.30813 |
| STM3436   | rpsS | 30S ribosomal protein S19                               | <b>0.17</b>  | 0.68232 |
| STM3436   | rpsS | 30S ribosomal protein S19                               | <b>0.40</b>  | 0.36872 |
| STM3437   | rplB | 50S ribosomal protein L2                                | <b>0.06</b>  | 0.89546 |
| STM3437   | rplB | 50S ribosomal protein L2                                | <b>0.43</b>  | 0.52208 |
| STM3438   | rplW | 50S ribosomal protein L23                               | <b>0.34</b>  | 0.43731 |
| STM3438   | rplW | 50S ribosomal protein L23                               | <b>0.30</b>  | 0.65730 |
| STM3439   | rplD | 50S ribosomal protein L4                                | <b>0.18</b>  | 0.65916 |
| STM3439   | rplD | 50S ribosomal protein L4                                | <b>0.27</b>  | 0.49633 |
| STM3440   | rplC | 50S ribosomal protein L3                                | <b>0.16</b>  | 0.68617 |
| STM3440   | rplC | 50S ribosomal protein L3                                | <b>0.22</b>  | 0.56618 |
| STM3456   | yheV | putative cytoplasmic protein                            | <b>-0.24</b> | 0.60552 |
| STM3456   | yheV | putative cytoplasmic protein                            | <b>-0.17</b> | 0.78421 |
| STM3457   | kefB | glutathione-regulated potassium-efflux system protein   | <b>-0.35</b> | 0.42766 |
| STM3457   | kefB | glutathione-regulated potassium-efflux system protein   | <b>0.39</b>  | 0.40930 |
|           |      | glutathione-regulated potassium-efflux system ancillary |              |         |
| STM3458   | yheR | protein                                                 | <b>-0.22</b> | 0.66506 |
|           |      | glutathione-regulated potassium-efflux system ancillary |              |         |
| STM3458   | yheR | protein                                                 | <b>-0.18</b> | 0.67823 |
| STM3459   | yheS | putative ABC transporter ATPase component               | <b>-0.46</b> | 0.38363 |

|         |         |                                            |              |         |
|---------|---------|--------------------------------------------|--------------|---------|
| STM3459 | yheS    | putative ABC transporter ATPase component  | <b>-0.50</b> | 0.28655 |
| STM3461 | STM3461 | putative cytoplasmic protein               | <b>-0.21</b> | 0.70423 |
| STM3461 | STM3461 | putative cytoplasmic protein               | <b>0.25</b>  | 0.49787 |
| STM3462 | yheT    | putative hydrolase                         | <b>-0.07</b> | 0.90605 |
| STM3462 | yheT    | putative hydrolase                         | <b>0.14</b>  | 0.73473 |
| STM3463 | yheU    | hypothetical protein STM3463               | <b>-0.42</b> | 0.34260 |
| STM3463 | yheU    | hypothetical protein STM3463               | <b>-0.14</b> | 0.79185 |
| STM3464 | prkB    | putative phosphoribulokinase               | <b>-0.57</b> | 0.23635 |
| STM3464 | prkB    | putative phosphoribulokinase               | <b>0.17</b>  | 0.75851 |
| STM3465 | yhfA    | putative inner membrane protein            | <b>-0.10</b> | 0.83191 |
| STM3465 | yhfA    | putative inner membrane protein            | <b>-0.05</b> | 0.91790 |
| STM3466 | crp     | catabolite activator protein               | <b>0.11</b>  | 0.81312 |
| STM3466 | crp     | catabolite activator protein               | <b>0.49</b>  | 0.22421 |
| STM3467 | yhfK    | putative inner membrane protein            | <b>-0.19</b> | 0.75075 |
| STM3467 | yhfK    | putative inner membrane protein            | <b>0.87</b>  | 0.11690 |
| STM3468 | argD    | bifunctional                               | <b>-0.52</b> | 0.52351 |
| STM3468 | argD    | bifunctional                               | <b>-0.09</b> | 0.84611 |
| STM3469 | pabA    | para-aminobenzoate synthase component II   | <b>-0.03</b> | 0.96001 |
| STM3469 | pabA    | para-aminobenzoate synthase component II   | <b>0.03</b>  | 0.95564 |
| STM3470 | fic     | putative cell filamentation protein        | <b>-0.24</b> | 0.65974 |
| STM3470 | fic     | putative cell filamentation protein        | <b>0.33</b>  | 0.49452 |
| STM3472 | ppiA    | peptidyl-prolyl cis-trans isomerase A      | <b>0.01</b>  | 0.98840 |
| STM3472 | ppiA    | peptidyl-prolyl cis-trans isomerase A      | <b>0.13</b>  | 0.73905 |
| STM3473 | yhfC    | hypothetical protein STM3473               | <b>0.12</b>  | 0.76803 |
| STM3473 | yhfC    | hypothetical protein STM3473               | <b>0.17</b>  | 0.74374 |
| STM3474 | nirB    | nitrite reductase large subunit            | <b>-0.62</b> | 0.30813 |
| STM3474 | nirB    | nitrite reductase large subunit            | <b>-0.18</b> | 0.68961 |
| STM3475 | nirD    | nitrite reductase small subunit            | <b>-0.42</b> | 0.46169 |
| STM3475 | nirD    | nitrite reductase small subunit            | <b>0.11</b>  | 0.81078 |
| STM3476 | nirC    | nitrite transport protein                  | <b>-0.15</b> | 0.73448 |
| STM3476 | nirC    | nitrite transport protein                  | <b>0.22</b>  | 0.77139 |
| STM3477 | cysG    | siroheme synthase                          | <b>-0.46</b> | 0.39668 |
| STM3477 | cysG    | siroheme synthase                          | <b>0.36</b>  | 0.45111 |
| STM3478 | bigA    | putative surface-exposed virulence protein | <b>0.05</b>  | 0.93804 |
| STM3478 | bigA    | putative surface-exposed virulence protein | <b>0.29</b>  | 0.45797 |
| STM3480 | yhfL    | putative outer membrane lipoprotein        | <b>0.02</b>  | 0.96850 |
| STM3480 | yhfL    | putative outer membrane lipoprotein        | <b>0.10</b>  | 0.82485 |
| STM3481 | trpS    | tryptophanyl-tRNA synthetase               | <b>-0.30</b> | 0.45623 |
| STM3481 | trpS    | tryptophanyl-tRNA synthetase               | <b>-0.31</b> | 0.49009 |
| STM3482 | gph     | phosphoglycolate phosphatase               | <b>-0.33</b> | 0.34102 |
| STM3482 | gph     | phosphoglycolate phosphatase               | <b>0.11</b>  | 0.77801 |
| STM3483 | rpe     | ribulose-phosphate 3-epimerase             | <b>-0.15</b> | 0.72247 |
| STM3483 | rpe     | ribulose-phosphate 3-epimerase             | <b>0.55</b>  | 0.17111 |
| STM3484 | dam     | DNA adenine methylase                      | <b>-0.71</b> | 0.13206 |
| STM3484 | dam     | DNA adenine methylase                      | <b>0.11</b>  | 0.83443 |
| STM3485 | damX    | membrane protein DamX                      | <b>-0.10</b> | 0.83949 |
| STM3485 | damX    | membrane protein DamX                      | <b>-0.12</b> | 0.80258 |
| STM3486 | aroB    | 3-dehydroquinate synthase                  | <b>0.00</b>  | 0.99372 |
| STM3486 | aroB    | 3-dehydroquinate synthase                  | <b>0.21</b>  | 0.56370 |
| STM3487 | aroK    | shikimate kinase I                         | <b>-0.07</b> | 0.89410 |
| STM3487 | aroK    | shikimate kinase I                         | <b>0.43</b>  | 0.38792 |
| STM3488 | hofQ    | putative type IV pilin assembly protein    | <b>-0.72</b> | 0.31677 |
| STM3488 | hofQ    | putative type IV pilin assembly protein    | <b>0.30</b>  | 0.52038 |
| STM3489 | yrfA    | putative inner membrane protein            | <b>-0.23</b> | 0.81667 |
| STM3489 | yrfA    | putative inner membrane protein            | <b>-0.05</b> | 0.91937 |
| STM3490 | yrfB    | putative inner membrane protein            | <b>-0.22</b> | 0.60311 |
| STM3490 | yrfB    | putative inner membrane protein            | <b>0.73</b>  | 0.21855 |
| STM3491 | yrfC    | putative inner membrane protein            | <b>-0.01</b> | 0.99009 |
| STM3491 | yrfC    | putative inner membrane protein            | <b>0.60</b>  | 0.18873 |
| STM3492 | yrfD    | putative periplasmic protein               | <b>-0.22</b> | 0.57633 |
| STM3492 | yrfD    | putative periplasmic protein               | <b>0.20</b>  | 0.72185 |
| STM3493 | mrcA    | penicillin-binding protein 1A              | <b>-0.03</b> | 0.94863 |
| STM3493 | mrcA    | penicillin-binding protein 1A              | <b>0.39</b>  | 0.38976 |

|           |         |                                            |              |         |
|-----------|---------|--------------------------------------------|--------------|---------|
| STM3494,S | yrfE    | putative NTP pyrophosphohydrolase          | <b>-0.14</b> | 0.78992 |
| STM3494,S | yrfE    | putative NTP pyrophosphohydrolase          | <b>0.39</b>  | 0.33074 |
| STM3495   | yrfF    | putative inner membrane protein            | <b>0.08</b>  | 0.85391 |
| STM3495   | yrfF    | putative inner membrane protein            | <b>0.22</b>  | 0.56452 |
| STM3496   | yrfG    | putative hydrolase                         | <b>-0.63</b> | 0.20151 |
| STM3496   | yrfG    | putative hydrolase                         | <b>-0.03</b> | 0.95608 |
| STM3497   | yrfH    | heat shock protein                         | <b>-0.71</b> | 0.13112 |
| STM3497   | yrfH    | heat shock protein                         | <b>-0.20</b> | 0.60891 |
| STM3498   | hslO    | Hsp33-like chaperonin                      | <b>-0.41</b> | 0.37580 |
| STM3498   | hslO    | Hsp33-like chaperonin                      | <b>0.10</b>  | 0.84930 |
| STM3499   | yhgE    | putative inner membrane protein            | <b>-0.46</b> | 0.42791 |
| STM3499   | yhgE    | putative inner membrane protein            | <b>0.05</b>  | 0.95532 |
| STM3500   | pckA    | phosphoenolpyruvate carboxykinase          | <b>-0.02</b> | 0.98340 |
| STM3500   | pckA    | phosphoenolpyruvate carboxykinase          | <b>0.39</b>  | 0.41774 |
| STM3501   | envZ    | osmolarity sensor protein                  | <b>-0.18</b> | 0.70229 |
| STM3501   | envZ    | osmolarity sensor protein                  | <b>-0.11</b> | 0.80139 |
| STM3502   | ompR    | osmolarity response regulator              | <b>-0.46</b> | 0.35557 |
| STM3502   | ompR    | osmolarity response regulator              | <b>0.03</b>  | 0.96244 |
| STM3503   | greB    | transcription elongation factor GreB       | <b>-0.30</b> | 0.44832 |
| STM3503   | greB    | transcription elongation factor GreB       | <b>0.27</b>  | 0.55956 |
| STM3504   | yhgF    | putative RNase R                           | <b>-0.10</b> | 0.82624 |
| STM3504   | yhgF    | putative RNase R                           | <b>-0.19</b> | 0.72549 |
| STM3505   | feoA    | ferrous iron transport protein A           | <b>-0.38</b> | 0.38490 |
| STM3505   | feoA    | ferrous iron transport protein A           | <b>-0.32</b> | 0.34770 |
| STM3506   | feoB    | ferrous iron transport protein B           | <b>-0.74</b> | 0.14354 |
| STM3506   | feoB    | ferrous iron transport protein B           | <b>-0.20</b> | 0.68277 |
| STM3507   | yhgG    | putative cytoplasmic protein               | <b>-0.45</b> | 0.27834 |
| STM3507   | yhgG    | putative cytoplasmic protein               | <b>0.16</b>  | 0.74714 |
| STM3508   | STM3508 | putative cytoplasmic protein               | <b>0.06</b>  | 0.91111 |
| STM3508   | STM3508 | putative cytoplasmic protein               | <b>0.01</b>  | 0.99447 |
| STM3509   | bioH    | putative hydrolase                         | <b>-0.24</b> | 0.54624 |
| STM3509   | bioH    | putative hydrolase                         | <b>-0.01</b> | 0.99512 |
| STM3510   | yhgH    | putative amidophosphoribosyltransferase    | <b>-0.09</b> | 0.86317 |
| STM3510   | yhgH    | putative amidophosphoribosyltransferase    | <b>0.17</b>  | 0.71763 |
| STM3511   | yhgl    | putative thioredoxin-like protein          | <b>-0.63</b> | 0.23724 |
| STM3511   | yhgl    | putative thioredoxin-like protein          | <b>0.00</b>  | 0.99870 |
| STM3512   | gntT    | high-affinity gluconate permease           | <b>0.55</b>  | 0.37632 |
| STM3512   | gntT    | high-affinity gluconate permease           | <b>0.47</b>  | 0.40227 |
| STM3513   | malQ    | 4-alpha-glucanotransferase                 | <b>-0.01</b> | 0.98718 |
| STM3513   | malQ    | 4-alpha-glucanotransferase                 | <b>0.44</b>  | 0.40820 |
| STM3514   | malP    | maltodextrin phosphorylase                 | <b>0.87</b>  | 0.19843 |
| STM3514   | malP    | maltodextrin phosphorylase                 | <b>0.89</b>  | 0.14030 |
| STM3515   | malT    | transcriptional regulator MalT             | <b>0.50</b>  | 0.22283 |
| STM3515   | malT    | transcriptional regulator MalT             | <b>0.15</b>  | 0.75395 |
| STM3516   | STM3516 | putative cytoplasmic protein               | <b>0.28</b>  | 0.64465 |
| STM3516   | STM3516 | putative cytoplasmic protein               | <b>0.29</b>  | 0.47614 |
| STM3517   | STM3517 | putative DNA-damage-inducible protein      | <b>0.07</b>  | 0.85053 |
| STM3517   | STM3517 | putative DNA-damage-inducible protein      | <b>0.48</b>  | 0.25125 |
| STM3518   | rtcA    | RNA 3'-terminal-phosphate cyclase          | <b>0.30</b>  | 0.76008 |
| STM3518   | rtcA    | RNA 3'-terminal-phosphate cyclase          | <b>0.49</b>  | 0.40020 |
| STM3519   | rtcB    | putative cytoplasmic protein               | <b>-0.26</b> | 0.61830 |
| STM3519   | rtcB    | putative cytoplasmic protein               | <b>0.15</b>  | 0.72192 |
| STM3521   | STM3521 | putative ribonucleoprotein related-protein | <b>0.11</b>  | 0.81667 |
| STM3521   | STM3521 | putative ribonucleoprotein related-protein | <b>0.50</b>  | 0.53045 |
| STM3522   | rtcR    | sigma N                                    | <b>-0.20</b> | 0.61474 |
| STM3522   | rtcR    | sigma N                                    | <b>-0.24</b> | 0.51300 |
| STM3523   | glpR    | glp operon transcriptional repressor       | <b>0.17</b>  | 0.63849 |
| STM3523   | glpR    | glp operon transcriptional repressor       | <b>0.19</b>  | 0.65974 |
| STM3524   | glpG    | glp regulon protein                        | <b>-0.06</b> | 0.89405 |
| STM3524   | glpG    | glp regulon protein                        | <b>0.19</b>  | 0.64909 |
| STM3525   | glpE    | thiosulfate sulfurtransferase              | <b>-0.16</b> | 0.76622 |
| STM3525   | glpE    | thiosulfate sulfurtransferase              | <b>0.21</b>  | 0.56759 |
| STM3526   | glpD    | sn-glycerol-3-phosphate dehydrogenase      | <b>-0.45</b> | 0.39615 |

|            |            |                                                     |              |         |
|------------|------------|-----------------------------------------------------|--------------|---------|
| STM3526    | glpD       | sn-glycerol-3-phosphate dehydrogenase               | <b>0.18</b>  | 0.64422 |
| STM3527    | STM3527    | putative inner membrane protein                     | <b>0.18</b>  | 0.65196 |
| STM3527    | STM3527    | putative inner membrane protein                     | <b>0.15</b>  | 0.78973 |
| STM3528    | STM3528    | putative periplasmic phosphate-binding protein      | <b>0.16</b>  | 0.69828 |
| STM3528    | STM3528    | putative periplasmic phosphate-binding protein      | <b>-0.06</b> | 0.94050 |
| STM3529    | gldA       | glycerol dehydrogenase                              | <b>-0.06</b> | 0.91170 |
| STM3529    | gldA       | glycerol dehydrogenase                              | <b>0.23</b>  | 0.52419 |
| STM3531    | STM3531    | putative dihydroxyacid dehydratase                  | <b>0.06</b>  | 0.94658 |
| STM3531    | STM3531    | putative dihydroxyacid dehydratase                  | <b>-0.07</b> | 0.90721 |
| STM3532    | STM3532    | putative dihydrodipicolinate synthetase             | <b>-0.45</b> | 0.33833 |
| STM3532    | STM3532    | putative dihydrodipicolinate synthetase             | <b>-0.36</b> | 0.68450 |
| STM3533    | STM3533    | putative transcriptional regulator                  | <b>-0.07</b> | 0.90440 |
| STM3533    | STM3533    | putative transcriptional regulator                  | <b>0.41</b>  | 0.49358 |
| STM3534    | glgP       | glycogen phosphorylase                              | <b>-0.14</b> | 0.78877 |
| STM3534    | glgP       | glycogen phosphorylase                              | <b>0.59</b>  | 0.34148 |
| STM3535    | glgA       | glycogen synthase                                   | <b>0.07</b>  | 0.90295 |
| STM3535    | glgA       | glycogen synthase                                   | <b>0.32</b>  | 0.38596 |
| STM3536    | glgC       | glucose-1-phosphate adenyllyltransferase            | <b>-0.12</b> | 0.83443 |
| STM3536    | glgC       | glucose-1-phosphate adenyllyltransferase            | <b>0.01</b>  | 0.99452 |
| STM3537    | glgX       | glycogen debranching enzyme                         | <b>-0.10</b> | 0.86385 |
| STM3537    | glgX       | glycogen debranching enzyme                         | <b>0.51</b>  | 0.34500 |
| STM3538    | glgB       | glycogen branching enzyme                           | <b>-0.19</b> | 0.93157 |
| STM3538    | glgB       | glycogen branching enzyme                           | <b>0.76</b>  | 0.55956 |
| STM3539    | asd        | aspartate-semialdehyde dehydrogenase                | <b>0.08</b>  | 0.83901 |
| STM3539    | asd        | aspartate-semialdehyde dehydrogenase                | <b>0.16</b>  | 0.76181 |
| STM3541    | gntU       | low-affinity gluconate permease                     | <b>-0.28</b> | 0.63493 |
| STM3541    | gntU       | low-affinity gluconate permease                     | <b>0.15</b>  | 0.77923 |
| STM3542    | gntK       | gluconate kinase 2                                  | <b>0.18</b>  | 0.66743 |
| STM3542    | gntK       | gluconate kinase 2                                  | <b>0.49</b>  | 0.38919 |
| STM3543    | gntR       | gluconate operon transcriptional repressor          | <b>-0.17</b> | 0.69519 |
| STM3543    | gntR       | gluconate operon transcriptional repressor          | <b>0.27</b>  | 0.48567 |
| STM3544    | yhhW       | putative cytoplasmic protein                        | <b>-0.14</b> | 0.73406 |
| STM3544    | yhhW       | putative cytoplasmic protein                        | <b>0.35</b>  | 0.48214 |
| STM3545    | yhhX       | putative oxidoreductase                             | <b>-0.76</b> | 0.13645 |
| STM3545    | yhhX       | putative oxidoreductase                             | <b>0.27</b>  | 0.45848 |
| STM3546    | yhhY       | putative transferase                                | <b>0.28</b>  | 0.79160 |
| STM3546    | yhhY       | putative transferase                                | <b>0.61</b>  | 0.26956 |
| STM3547,Sc | STM3547,Sc | putative transcriptional regulator                  | <b>0.36</b>  | 0.45861 |
| STM3547,Sc | STM3547,Sc | putative transcriptional regulator                  | <b>0.76</b>  | 0.23114 |
| STM3548    | STM3548    | putative cytoplasmic protein                        | <b>-0.33</b> | 0.50811 |
| STM3548    | STM3548    | putative cytoplasmic protein                        | <b>0.14</b>  | 0.86576 |
| STM3549    | STM3549    | putative inner membrane protein                     | <b>0.16</b>  | 0.81061 |
| STM3549    | STM3549    | putative inner membrane protein                     | <b>0.30</b>  | 0.61843 |
| STM3550    | STM3550    | putative phosphotriesterase                         | <b>-0.44</b> | 0.29510 |
| STM3550    | STM3550    | putative phosphotriesterase                         | <b>0.47</b>  | 0.24712 |
| STM3551    | ggt        | gamma-glutamyltranspeptidase                        | <b>-0.67</b> | 0.39052 |
| STM3551    | ggt        | gamma-glutamyltranspeptidase                        | <b>0.01</b>  | 0.98894 |
| STM3552    | yhhA       | putative outer membrane protein                     | <b>-0.53</b> | 0.19398 |
| STM3552    | yhhA       | putative outer membrane protein                     | <b>0.10</b>  | 0.81455 |
| STM3553    | ugpQ       | cytoplasmic glycerophosphodiester phosphodiesterase | <b>-0.03</b> | 0.96107 |
| STM3553    | ugpQ       | cytoplasmic glycerophosphodiester phosphodiesterase | <b>-0.08</b> | 0.87254 |
| STM3554    | ugpC       | sn-glycerol 3-phosphate transport protein           | <b>0.12</b>  | 0.80637 |
| STM3554    | ugpC       | sn-glycerol 3-phosphate transport protein           | <b>0.01</b>  | 0.98489 |
| STM3555    | ugpE       | sn-glycerol 3-phosphate transport protein           | <b>-0.31</b> | 0.42811 |
| STM3555    | ugpE       | sn-glycerol 3-phosphate transport protein           | <b>0.44</b>  | 0.36777 |
| STM3556    | ugpA       | sn-glycerol 3-phosphate transport protein           | <b>-0.20</b> | 0.76184 |
| STM3556    | ugpA       | sn-glycerol 3-phosphate transport protein           | <b>-0.17</b> | 0.79752 |
| STM3557    | ugpB       | sn-glycerol 3-phosphate transport protein           | <b>-0.31</b> | 0.70249 |
| STM3557    | ugpB       | sn-glycerol 3-phosphate transport protein           | <b>0.20</b>  | 0.71693 |
| STM3558    | STM3558    | death-on-curing protein                             | <b>0.48</b>  | 0.72247 |
| STM3558    | STM3558    | death-on-curing protein                             | <b>0.40</b>  | 0.43799 |
| STM3559    | yhhV       | putative cytoplasmic protein                        | <b>-0.27</b> | 0.50201 |
| STM3559    | yhhV       | putative cytoplasmic protein                        | <b>0.44</b>  | 0.33710 |

|           |         |                                                     |              |         |
|-----------|---------|-----------------------------------------------------|--------------|---------|
| STM3560   | livF    | high-affinity branched-chain amino acid transporter | <b>-0.24</b> | 0.55403 |
| STM3560   | livF    | high-affinity branched-chain amino acid transporter | <b>0.29</b>  | 0.65383 |
| STM3561   | livG    | high-affinity branched-chain amino acid transporter | <b>-0.22</b> | 0.75552 |
| STM3561   | livG    | high-affinity branched-chain amino acid transporter | <b>0.04</b>  | 0.93841 |
| STM3562   | livM    | high-affinity branched-chain amino acid transporter | <b>-0.52</b> | 0.37178 |
| STM3562   | livM    | high-affinity branched-chain amino acid transporter | <b>-0.18</b> | 0.69988 |
| STM3563   | livH    | high-affinity branched-chain amino acid transporter | <b>-0.31</b> | 0.73421 |
| STM3563   | livH    | high-affinity branched-chain amino acid transporter | <b>0.07</b>  | 0.90990 |
| STM3564   | livK    | high-affinity branched-chain amino acid transporter | <b>-0.23</b> | 0.70430 |
| STM3564   | livK    | high-affinity branched-chain amino acid transporter | <b>-0.07</b> | 0.91917 |
| STM3565   | yhhK    | putative acetyltransferase                          | <b>-0.10</b> | 0.79741 |
| STM3565   | yhhK    | putative acetyltransferase                          | <b>0.42</b>  | 0.29796 |
| STM3567   | livJ    | high-affinity branched-chain amino acid transporter | <b>-0.37</b> | 0.43772 |
| STM3567   | livJ    | high-affinity branched-chain amino acid transporter | <b>0.38</b>  | 0.57512 |
| STM3568   | rpoH    | RNA polymerase sigma factor                         | <b>-0.18</b> | 0.67351 |
| STM3568   | rpoH    | RNA polymerase sigma factor                         | <b>0.04</b>  | 0.92637 |
| STM3569   | ftsX    | putative cell division protein                      | <b>-0.09</b> | 0.83723 |
| STM3569   | ftsX    | putative cell division protein                      | <b>-0.07</b> | 0.86334 |
| STM3570   | ftsE    | putative cell division ATPase                       | <b>-0.42</b> | 0.29912 |
| STM3570   | ftsE    | putative cell division ATPase                       | <b>0.15</b>  | 0.71782 |
| STM3571   | ftsY    | cell division membrane protein                      | <b>-0.01</b> | 0.97720 |
| STM3571   | ftsY    | cell division membrane protein                      | <b>-0.08</b> | 0.85053 |
| STM3572   | yhhF    | putative methyltransferase                          | <b>-0.06</b> | 0.91170 |
| STM3572   | yhhF    | putative methyltransferase                          | <b>0.17</b>  | 0.65271 |
| STM3573   | yhhL    | putative inner membrane protein                     | <b>0.10</b>  | 0.80093 |
| STM3573   | yhhL    | putative inner membrane protein                     | <b>0.09</b>  | 0.86385 |
| STM3574   | yhhM    | putative inner membrane protein                     | <b>-0.15</b> | 0.74368 |
| STM3574   | yhhM    | putative inner membrane protein                     | <b>-0.26</b> | 0.47205 |
| STM3575   | yhhN    | putative inner membrane protein                     | <b>0.15</b>  | 0.79635 |
| STM3575   | yhhN    | putative inner membrane protein                     | <b>0.63</b>  | 0.24005 |
| STM3576   | zntA    | Pb/Cd/Zn/Hg-transporting ATPase                     | <b>-0.19</b> | 0.70102 |
| STM3576   | zntA    | Pb/Cd/Zn/Hg-transporting ATPase                     | <b>0.26</b>  | 0.67351 |
|           |         | methyl-accepting transmembrane citrate/phenol       |              |         |
| STM3577   | tcp     | chemoreceptor                                       | <b>-0.47</b> | 0.54917 |
|           |         | methyl-accepting transmembrane citrate/phenol       |              |         |
| STM3577   | tcp     | chemoreceptor                                       | <b>-0.27</b> | 0.64786 |
| STM3578   | yhhP    | hypothetical protein STM3578                        | <b>0.49</b>  | 0.22602 |
| STM3578   | yhhP    | hypothetical protein STM3578                        | <b>0.30</b>  | 0.66743 |
| STM3579   | yhhQ    | putative integral membrane protein                  | <b>0.02</b>  | 0.97219 |
| STM3579   | yhhQ    | putative integral membrane protein                  | <b>0.20</b>  | 0.65644 |
| STM3580   | STM3580 | putative inner membrane lipoprotein                 | <b>-0.64</b> | 0.30508 |
| STM3580   | STM3580 | putative inner membrane lipoprotein                 | <b>0.08</b>  | 0.86680 |
| STM3581,S | yhhS    | hypothetical protein STM3581,S                      | <b>0.10</b>  | 0.79752 |
| STM3581,S | yhhS    | hypothetical protein STM3581,S                      | <b>0.17</b>  | 0.74481 |
| STM3582   | yhhT    | putative permease                                   | <b>-0.04</b> | 0.95608 |
| STM3582   | yhhT    | putative permease                                   | <b>0.58</b>  | 0.34770 |
| STM3583   | acpT    | putative phosphopantetheinyl transferase            | <b>-0.14</b> | 0.86385 |
| STM3583   | acpT    | putative phosphopantetheinyl transferase            | <b>0.32</b>  | 0.52364 |
| STM3584   | nikR    | nickel responsive regulator                         | <b>-0.07</b> | 0.89004 |
| STM3584   | nikR    | nickel responsive regulator                         | <b>-0.03</b> | 0.95363 |
| STM3585   | yhhJ    | putative ABC transport protein                      | <b>-0.03</b> | 0.98958 |
| STM3585   | yhhJ    | putative ABC transport protein                      | <b>0.71</b>  | 0.19398 |
|           |         | putative ABC-type multidrug transport system ATPase |              |         |
| STM3586,S | yhiH    | component                                           | <b>-0.30</b> | 0.59455 |
|           |         | putative ABC-type multidrug transport system ATPase |              |         |
| STM3586,S | yhiH    | component                                           | <b>0.30</b>  | 0.42729 |
| STM3587   | yhiI    | hypothetical protein STM3587                        | <b>-0.24</b> | 0.56129 |
| STM3587   | yhiI    | hypothetical protein STM3587                        | <b>0.16</b>  | 0.68405 |
| STM3588   | yhiN    | putative periplasmic protein                        | <b>-0.34</b> | 0.56120 |
| STM3588   | yhiN    | putative periplasmic protein                        | <b>0.14</b>  | 0.79278 |
| STM3589   | pitA    | low-affinity phosphate transporter                  | <b>0.21</b>  | 0.63403 |
| STM3589   | pitA    | low-affinity phosphate transporter                  | <b>0.36</b>  | 0.33703 |
| STM3590   | uspB    | universal stress protein UspB                       | <b>0.15</b>  | 0.72821 |

|         |         |                                                |              |         |
|---------|---------|------------------------------------------------|--------------|---------|
| STM3590 | uspB    | universal stress protein UspB                  | <b>-0.20</b> | 0.67448 |
| STM3591 | uspA    | universal stress protein A                     | <b>-0.13</b> | 0.73473 |
| STM3591 | uspA    | universal stress protein A                     | <b>-0.20</b> | 0.62188 |
| STM3592 | yhiP    | putative peptide transport protein             | <b>-0.15</b> | 0.78091 |
| STM3592 | yhiP    | putative peptide transport protein             | <b>-1.51</b> | 0.61201 |
| STM3593 | yhiQ    | putative SAM-dependent methyltransferase       | <b>-0.35</b> | 0.68062 |
| STM3593 | yhiQ    | putative SAM-dependent methyltransferase       | <b>0.10</b>  | 0.87297 |
| STM3594 | prlC    | oligopeptidase A                               | <b>-0.32</b> | 0.38236 |
| STM3594 | prlC    | oligopeptidase A                               | <b>0.30</b>  | 0.43219 |
| STM3595 | STM3595 | putative phosphatase                           | <b>-0.55</b> | 0.17603 |
| STM3595 | STM3595 | putative phosphatase                           | <b>-0.20</b> | 0.61960 |
| STM3596 | yhiR    | putative cytoplasmic protein                   | <b>-0.18</b> | 0.73473 |
| STM3596 | yhiR    | putative cytoplasmic protein                   | <b>0.03</b>  | 0.97168 |
| STM3597 | gor     | glutathione reductase                          | <b>-0.28</b> | 0.46629 |
| STM3597 | gor     | glutathione reductase                          | <b>0.07</b>  | 0.88045 |
| STM3598 | STM3598 | putative L-asparaginase                        | <b>-0.56</b> | 0.27378 |
| STM3598 | STM3598 | putative L-asparaginase                        | <b>-0.49</b> | 0.33452 |
| STM3599 | STM3599 | anaerobic C4-dicarboxylate transporter         | <b>-0.60</b> | 0.27658 |
| STM3599 | STM3599 | anaerobic C4-dicarboxylate transporter         | <b>0.09</b>  | 0.90733 |
| STM3600 | STM3600 | putative sugar kinase                          | <b>-0.45</b> | 0.39809 |
| STM3600 | STM3600 | putative sugar kinase                          | <b>0.21</b>  | 0.71971 |
| STM3601 | STM3601 | putative phosphosugar isomerase                | <b>0.01</b>  | 0.99152 |
| STM3601 | STM3601 | putative phosphosugar isomerase                | <b>0.28</b>  | 0.56103 |
| STM3602 | STM3602 | putative regulatory protein                    | <b>0.02</b>  | 0.97626 |
| STM3602 | STM3602 | putative regulatory protein                    | <b>-0.04</b> | 0.94143 |
| STM3603 | treF    | cytoplasmic trehalase                          | <b>-0.10</b> | 0.84436 |
| STM3603 | treF    | cytoplasmic trehalase                          | <b>0.42</b>  | 0.28970 |
| STM3604 | STM3604 | putative inner membrane protein                | <b>-0.11</b> | 0.81830 |
| STM3604 | STM3604 | putative inner membrane protein                | <b>0.72</b>  | 0.17139 |
| STM3605 | STM3605 | putative phage endolysin                       | <b>-0.14</b> | 0.79324 |
| STM3605 | STM3605 | putative phage endolysin                       | <b>0.10</b>  | 0.84863 |
| STM3606 | yhjB    | putative transcriptional regulator             | <b>-0.32</b> | 0.64498 |
| STM3606 | yhjB    | putative transcriptional regulator             | <b>-0.08</b> | 0.87566 |
| STM3607 | yhjC    | putative transcriptional regulator             | <b>-0.38</b> | 0.34156 |
| STM3607 | yhjC    | putative transcriptional regulator             | <b>0.61</b>  | 0.26910 |
| STM3608 | yhjD    | putative tRNA-processing ribonuclease          | <b>-0.25</b> | 0.55974 |
| STM3608 | yhjD    | putative tRNA-processing ribonuclease          | <b>0.89</b>  | 0.28655 |
| STM3609 | yhjE    | putative transport protein                     | <b>-0.06</b> | 0.91170 |
| STM3609 | yhjE    | putative transport protein                     | <b>0.28</b>  | 0.55618 |
| STM3610 | yhjG    | putative inner membrane protein                | <b>-0.04</b> | 0.92351 |
| STM3610 | yhjG    | putative inner membrane protein                | <b>0.76</b>  | 0.16039 |
| STM3611 | yhjH    | hypothetical protein STM3611                   | <b>0.17</b>  | 0.69042 |
| STM3611 | yhjH    | hypothetical protein STM3611                   | <b>0.31</b>  | 0.49422 |
| STM3612 | kdgK    | ketodeoxygluconokinase                         | <b>0.03</b>  | 0.94663 |
| STM3612 | kdgK    | ketodeoxygluconokinase                         | <b>0.03</b>  | 0.95380 |
| STM3613 | yhjJ    | putative Zn-dependent peptidase                | <b>0.16</b>  | 0.89252 |
| STM3613 | yhjJ    | putative Zn-dependent peptidase                | <b>0.13</b>  | 0.83443 |
| STM3614 | dctA    | C4-dicarboxylate transport protein             | <b>0.52</b>  | 0.24520 |
| STM3614 | dctA    | C4-dicarboxylate transport protein             | <b>0.40</b>  | 0.52689 |
| STM3615 | yhjK    | putative diguanylate cyclase/phosphodiesterase | <b>0.00</b>  | 0.99929 |
| STM3615 | yhjK    | putative diguanylate cyclase/phosphodiesterase | <b>0.22</b>  | 0.61735 |
| STM3616 | yhjL    | tetratricopeptide repeat protein               | <b>0.13</b>  | 0.91181 |
| STM3616 | yhjL    | tetratricopeptide repeat protein               | <b>0.44</b>  | 0.30813 |
| STM3617 | STM3617 | endo-1,4-D-glucanase                           | <b>0.12</b>  | 0.79093 |
| STM3617 | STM3617 | endo-1,4-D-glucanase                           | <b>0.00</b>  | 0.99997 |
| STM3618 | yhjN    | putative cellulose synthase                    | <b>0.10</b>  | 0.86190 |
| STM3618 | yhjN    | putative cellulose synthase                    | <b>0.20</b>  | 0.62575 |
| STM3619 | yhjO    | glycosyltransferase                            | <b>0.03</b>  | 0.94990 |
| STM3619 | yhjO    | glycosyltransferase                            | <b>0.28</b>  | 0.48668 |
| STM3620 | yhjQ    | putative chromosome partitioning ATPase        | <b>-0.07</b> | 0.87740 |
| STM3620 | yhjQ    | putative chromosome partitioning ATPase        | <b>0.59</b>  | 0.27378 |
| STM3621 | yhjR    | putative cytoplasmic protein                   | <b>-0.07</b> | 0.90502 |
| STM3621 | yhjR    | putative cytoplasmic protein                   | <b>-0.27</b> | 0.46720 |

|          |          |                                                  |              |         |
|----------|----------|--------------------------------------------------|--------------|---------|
| STM3622  | yhjS     | putative cytoplasmic protein                     | <b>-0.31</b> | 0.41391 |
| STM3622  | yhjS     | putative cytoplasmic protein                     | <b>0.32</b>  | 0.51203 |
| STM3623  | yhjT     | putative inner membrane protein                  | <b>-0.09</b> | 0.85157 |
| STM3623  | yhjT     | putative inner membrane protein                  | <b>0.15</b>  | 0.70762 |
| STM3624  | yhjU     | putative inner membrane protein                  | <b>-0.49</b> | 0.36297 |
| STM3624  | yhjU     | putative inner membrane protein                  | <b>-0.52</b> | 0.22540 |
| STM3624A | STM3624A | cystathionine gamma-synthase                     | <b>-0.04</b> | 0.95257 |
| STM3624A | STM3624A | cystathionine gamma-synthase                     | <b>0.18</b>  | 0.64969 |
| STM3625  | yhjV     | putative transport protein                       | <b>-0.34</b> | 0.53459 |
| STM3625  | yhjV     | putative transport protein                       | <b>0.02</b>  | 0.96640 |
| STM3626  | dppF     | dipeptide transport protein                      | <b>0.13</b>  | 0.76492 |
| STM3626  | dppF     | dipeptide transport protein                      | <b>0.33</b>  | 0.60936 |
| STM3627  | dppD     | dipeptide transport protein                      | <b>0.21</b>  | 0.79180 |
| STM3627  | dppD     | dipeptide transport protein                      | <b>0.66</b>  | 0.24908 |
| STM3628  | dppC     | dipeptide transport protein 2                    | <b>-0.01</b> | 0.98124 |
| STM3628  | dppC     | dipeptide transport protein 2                    | <b>0.42</b>  | 0.33730 |
| STM3629  | dppB     | dipeptide transport protein 1                    | <b>-0.29</b> | 0.45811 |
| STM3629  | dppB     | dipeptide transport protein 1                    | <b>0.57</b>  | 0.21562 |
| STM3630  | dppA     | dipeptide transport protein                      | <b>-0.03</b> | 0.95985 |
| STM3630  | dppA     | dipeptide transport protein                      | <b>0.57</b>  | 0.27312 |
| STM3631  | STM3631  | putative xanthine permease                       | <b>-0.33</b> | 0.63328 |
| STM3631  | STM3631  | putative xanthine permease                       | <b>0.88</b>  | 0.39069 |
| STM3632  | STM3632  | hypothetical protein STM3632                     | <b>0.05</b>  | 0.89979 |
| STM3632  | STM3632  | hypothetical protein STM3632                     | <b>0.22</b>  | 0.60084 |
| STM3633  | STM3633  | putative regulatory protein                      | <b>-0.50</b> | 0.32770 |
| STM3633  | STM3633  | putative regulatory protein                      | <b>-0.27</b> | 0.60891 |
| STM3634  | proK     | STM3634                                          | <b>0.28</b>  | 0.69828 |
| STM3634  | proK     | STM3634                                          | <b>0.07</b>  | 0.95608 |
|          |          | putative membrane-associated metal-dependent     |              |         |
| STM3635  | yhjW     | hydrolase                                        | <b>0.19</b>  | 0.70966 |
|          |          | putative membrane-associated metal-dependent     |              |         |
| STM3635  | yhjW     | hydrolase                                        | <b>0.45</b>  | 0.45837 |
| STM3636  | lpfE     | long polar fimbrial minor protein                | <b>0.10</b>  | 0.78521 |
| STM3636  | lpfE     | long polar fimbrial minor protein                | <b>1.16</b>  | 0.07353 |
| STM3637  | lpfD     | long polar fimbrial protein                      | <b>0.07</b>  | 0.93340 |
| STM3637  | lpfD     | long polar fimbrial protein                      | <b>0.57</b>  | 0.23123 |
| STM3638  | lpfC     | long polar fimbrial outer membrane usher protein | <b>0.00</b>  | 0.99769 |
| STM3638  | lpfC     | long polar fimbrial outer membrane usher protein | <b>-0.10</b> | 0.89468 |
| STM3639  | lpfB     | long polar fimbrial chaperone precursor          | <b>-0.26</b> | 0.73415 |
| STM3639  | lpfB     | long polar fimbrial chaperone precursor          | <b>0.98</b>  | 0.34480 |
| STM3640  | lpfA     | long polar fimbrial protein A precursor          | <b>-0.18</b> | 0.73546 |
| STM3640  | lpfA     | long polar fimbrial protein A precursor          | <b>0.16</b>  | 0.70933 |
| STM3641  | yhjY     | putative lipase                                  | <b>-0.40</b> | 0.40642 |
| STM3641  | yhjY     | putative lipase                                  | <b>0.02</b>  | 0.98090 |
| STM3642  | tag      | 3-methyl-adenine DNA glycosylase I               | <b>-0.11</b> | 0.84456 |
| STM3642  | tag      | 3-methyl-adenine DNA glycosylase I               | <b>-0.03</b> | 0.95318 |
| STM3643  | yiaC     | putative acetyltransferase                       | <b>-0.36</b> | 0.47844 |
| STM3643  | yiaC     | putative acetyltransferase                       | <b>0.26</b>  | 0.65130 |
| STM3644  | bisC     | biotin sulfoxide reductase                       | <b>0.03</b>  | 0.94765 |
| STM3644  | bisC     | biotin sulfoxide reductase                       | <b>0.00</b>  | 0.99800 |
| STM3645  | yiaD     | putative outer membrane lipoprotein              | <b>-0.46</b> | 0.36942 |
| STM3645  | yiaD     | putative outer membrane lipoprotein              | <b>0.14</b>  | 0.86190 |
| STM3646  | yiaE     | 2-hydroxyacid dehydrogenase                      | <b>-0.32</b> | 0.37321 |
| STM3646  | yiaE     | 2-hydroxyacid dehydrogenase                      | <b>0.50</b>  | 0.21663 |
| STM3647  | yiaF     | putative outer membrane lipoprotein              | <b>-0.42</b> | 0.38068 |
| STM3647  | yiaF     | putative outer membrane lipoprotein              | <b>0.11</b>  | 0.87254 |
| STM3648  | yiaG     | putative transcriptional regulator               | <b>-0.11</b> | 0.89233 |
| STM3648  | yiaG     | putative transcriptional regulator               | <b>0.06</b>  | 0.93203 |
| STM3649  | cspA     | major cold shock protein                         | <b>-0.35</b> | 0.68830 |
| STM3649  | cspA     | major cold shock protein                         | <b>0.06</b>  | 0.94050 |
| STM3650  | STM3650  | hypothetical protein STM3650                     | <b>-0.56</b> | 0.38722 |
| STM3650  | STM3650  | hypothetical protein STM3650                     | <b>-0.13</b> | 0.81270 |
| STM3651  | STM3651  | putative acetyltransferase                       | <b>-0.10</b> | 0.83134 |

|         |         |                                                    |              |         |
|---------|---------|----------------------------------------------------|--------------|---------|
| STM3651 | STM3651 | putative acetyltransferase                         | <b>0.34</b>  | 0.35770 |
| STM3652 | STM3652 | putative cytoplasmic protein                       | <b>-0.03</b> | 0.95665 |
| STM3652 | STM3652 | putative cytoplasmic protein                       | <b>0.17</b>  | 0.69170 |
| STM3655 | glyS    | glycyl-tRNA synthetase beta subunit                | <b>-0.41</b> | 0.31710 |
| STM3655 | glyS    | glycyl-tRNA synthetase beta subunit                | <b>-0.34</b> | 0.58934 |
| STM3656 | glyQ    | glycyl-tRNA synthetase alpha subunit               | <b>0.06</b>  | 0.89546 |
| STM3656 | glyQ    | glycyl-tRNA synthetase alpha subunit               | <b>-0.09</b> | 0.84354 |
| STM3657 | STM3657 | putative outer membrane lipoprotein                | <b>-0.23</b> | 0.52728 |
| STM3657 | STM3657 | putative outer membrane lipoprotein                | <b>-0.23</b> | 0.62216 |
| STM3658 | yiaH    | putative inner membrane protein                    | <b>-0.03</b> | 0.95548 |
| STM3658 | yiaH    | putative inner membrane protein                    | <b>0.55</b>  | 0.50825 |
| STM3659 | yiaB    | putative inner membrane protein                    | <b>-0.35</b> | 0.61285 |
| STM3659 | yiaB    | putative inner membrane protein                    | <b>0.91</b>  | 0.23398 |
| STM3660 | xylB    | xylulokinase                                       | <b>0.17</b>  | 0.68545 |
| STM3660 | xylB    | xylulokinase                                       | <b>0.42</b>  | 0.40532 |
| STM3661 | xylA    | xylose isomerase                                   | <b>0.18</b>  | 0.71098 |
| STM3661 | xylA    | xylose isomerase                                   | <b>0.11</b>  | 0.92161 |
| STM3662 | xylR    | xylose operon regulatory protein                   | <b>-0.34</b> | 0.47879 |
| STM3662 | xylR    | xylose operon regulatory protein                   | <b>-0.30</b> | 0.41676 |
| STM3663 | bax     | putative ATP-binding protein                       | <b>-0.36</b> | 0.50825 |
| STM3663 | bax     | putative ATP-binding protein                       | <b>-0.11</b> | 0.79056 |
| STM3664 | malS    | periplasmic alpha-amylase precursor                | <b>0.26</b>  | 0.52381 |
| STM3664 | malS    | periplasmic alpha-amylase precursor                | <b>0.35</b>  | 0.65730 |
| STM3665 | avtA    | valine--pyruvate transaminase                      | <b>-0.42</b> | 0.52208 |
| STM3665 | avtA    | valine--pyruvate transaminase                      | <b>-0.06</b> | 0.90733 |
| STM3666 | ysaA    | putative oxidoreductase                            | <b>-0.08</b> | 0.87965 |
| STM3666 | ysaA    | putative oxidoreductase                            | <b>0.01</b>  | 0.98539 |
| STM3667 | yiaJ    | transcriptional repressor                          | <b>-0.36</b> | 0.39334 |
| STM3667 | yiaJ    | transcriptional repressor                          | <b>0.41</b>  | 0.39315 |
| STM3668 | yiaK    | putative malate dehydrogenase                      | <b>-0.17</b> | 0.84355 |
| STM3668 | yiaK    | putative malate dehydrogenase                      | <b>0.21</b>  | 0.69668 |
| STM3669 | yiaL    | putative cytoplasmic protein                       | <b>-0.58</b> | 0.17793 |
| STM3669 | yiaL    | putative cytoplasmic protein                       | <b>0.51</b>  | 0.24125 |
| STM3670 | STM3670 | putative chemotaxis protein                        | <b>-0.80</b> | 0.37154 |
| STM3670 | STM3670 | putative chemotaxis protein                        | <b>0.34</b>  | 0.57731 |
| STM3671 | yiaM    | putative transporter                               | <b>-0.88</b> | 0.16281 |
| STM3671 | yiaM    | putative transporter                               | <b>-0.09</b> | 0.93011 |
| STM3672 | yiaN    | hypothetical protein STM3672                       | <b>-0.53</b> | 0.57021 |
| STM3672 | yiaN    | hypothetical protein STM3672                       | <b>-0.26</b> | 0.73542 |
| STM3673 | yiaO    | putative periplasmic dicarboxylate-binding protein | <b>-0.11</b> | 0.81544 |
| STM3673 | yiaO    | putative periplasmic dicarboxylate-binding protein | <b>0.94</b>  | 0.17754 |
| STM3674 | lyxK    | L-xylulose kinase                                  | <b>0.15</b>  | 0.87965 |
| STM3674 | lyxK    | L-xylulose kinase                                  | <b>-0.15</b> | 0.75424 |
| STM3675 | sgbH    | putative 3-hexulose-6-phosphate isomerase          | <b>-0.65</b> | 0.18566 |
| STM3675 | sgbH    | putative 3-hexulose-6-phosphate isomerase          | <b>0.29</b>  | 0.55338 |
| STM3676 | sgbU    | putative 3-hexulose-6-phosphate isomerase          | <b>-0.78</b> | 0.11224 |
| STM3676 | sgbU    | putative 3-hexulose-6-phosphate isomerase          | <b>0.19</b>  | 0.66893 |
| STM3677 | sgbE    | L-ribulose-5-phosphate 4-epimerase                 | <b>-0.51</b> | 0.28655 |
| STM3677 | sgbE    | L-ribulose-5-phosphate 4-epimerase                 | <b>0.13</b>  | 0.82162 |
| STM3678 | STM3678 | putative regulatory protein                        | <b>-0.26</b> | 0.60444 |
| STM3678 | STM3678 | putative regulatory protein                        | <b>0.15</b>  | 0.77660 |
| STM3679 | STM3679 | putative cytoplasmic protein                       | <b>-0.15</b> | 0.80798 |
| STM3679 | STM3679 | putative cytoplasmic protein                       | <b>0.74</b>  | 0.34812 |
| STM3680 | aldB    | aldehyde dehydrogenase B                           | <b>0.15</b>  | 0.77745 |
| STM3680 | aldB    | aldehyde dehydrogenase B                           | <b>1.26</b>  | 0.06346 |
| STM3681 | STM3681 | putative transcriptional regulator                 | <b>-0.38</b> | 0.52781 |
| STM3681 | STM3681 | putative transcriptional regulator                 | <b>0.44</b>  | 0.43219 |
| STM3682 | selB    | selenocysteinyI-tRNA-specific translation factor   | <b>-0.21</b> | 0.63101 |
| STM3682 | selB    | selenocysteinyI-tRNA-specific translation factor   | <b>-0.18</b> | 0.61824 |
| STM3683 | selA    | selenocysteine synthase                            | <b>-0.21</b> | 0.63223 |
| STM3683 | selA    | selenocysteine synthase                            | <b>-0.07</b> | 0.92170 |
| STM3684 | yibF    | putative glutathione S-transferase                 | <b>-0.14</b> | 0.75418 |
| STM3684 | yibF    | putative glutathione S-transferase                 | <b>0.14</b>  | 0.76538 |

|         |         |                                              |              |         |
|---------|---------|----------------------------------------------|--------------|---------|
| STM3685 | mtlA    | mannitol-specific enzyme IIABC component     | <b>-0.06</b> | 0.90247 |
| STM3685 | mtlA    | mannitol-specific enzyme IIABC component     | <b>0.34</b>  | 0.55338 |
| STM3686 | mtlD    | mannitol-1-phosphate 5-dehydrogenase         | <b>0.12</b>  | 0.79037 |
| STM3686 | mtlD    | mannitol-1-phosphate 5-dehydrogenase         | <b>0.51</b>  | 0.40562 |
| STM3687 | mtlR    | mannitol operon repressor                    | <b>-0.20</b> | 0.73157 |
| STM3687 | mtlR    | mannitol operon repressor                    | <b>0.00</b>  | 0.99540 |
| STM3688 | STM3688 | putative cytoplasmic protein                 | <b>-0.49</b> | 0.38919 |
| STM3688 | STM3688 | putative cytoplasmic protein                 | <b>-0.14</b> | 0.76381 |
| STM3689 | yibL    | putative cytoplasmic protein                 | <b>0.07</b>  | 0.94765 |
| STM3689 | yibL    | putative cytoplasmic protein                 | <b>0.22</b>  | 0.55403 |
| STM3690 | STM3690 | putative inner membrane lipoprotein          | <b>-0.54</b> | 0.44210 |
| STM3690 | STM3690 | putative inner membrane lipoprotein          | <b>0.17</b>  | 0.82956 |
| STM3691 | STM3691 | putative inner membrane protein              | <b>0.15</b>  | 0.83789 |
| STM3691 | STM3691 | putative inner membrane protein              | <b>0.58</b>  | 0.15736 |
| STM3692 | lldP    | transporter LctP                             | <b>0.43</b>  | 0.40819 |
| STM3692 | lldP    | transporter LctP                             | <b>0.43</b>  | 0.45367 |
| STM3693 | lldR    | putative transcriptional regulator           | <b>0.26</b>  | 0.70201 |
| STM3693 | lldR    | putative transcriptional regulator           | <b>0.93</b>  | 0.18265 |
| STM3694 | lldD    | L-lactate dehydrogenase                      | <b>-0.01</b> | 0.98539 |
| STM3694 | lldD    | L-lactate dehydrogenase                      | <b>-0.12</b> | 0.89151 |
| STM3695 | yibK    | putative tRNA/rRNA methyltransferase         | <b>-0.34</b> | 0.48817 |
| STM3695 | yibK    | putative tRNA/rRNA methyltransferase         | <b>-0.06</b> | 0.89580 |
| STM3696 | STM3696 | putative transcriptional regulator           | <b>-0.42</b> | 0.36999 |
| STM3696 | STM3696 | putative transcriptional regulator           | <b>0.03</b>  | 0.94421 |
| STM3697 | STM3697 | putative mandelate racemase                  | <b>-0.61</b> | 0.34070 |
| STM3697 | STM3697 | putative mandelate racemase                  | <b>-0.03</b> | 0.96364 |
| STM3698 | STM3698 | putative permease                            | <b>-0.08</b> | 0.89979 |
| STM3698 | STM3698 | putative permease                            | <b>-0.01</b> | 0.98581 |
| STM3699 | cysE    | serine acetyltransferase                     | <b>-0.20</b> | 0.71169 |
| STM3699 | cysE    | serine acetyltransferase                     | <b>0.37</b>  | 0.40412 |
|         |         | NAD(P)H-dependent glycerol-3-phosphate       |              |         |
| STM3700 | gpsA    | dehydrogenase                                | <b>0.08</b>  | 0.89624 |
|         |         | NAD(P)H-dependent glycerol-3-phosphate       |              |         |
| STM3700 | gpsA    | dehydrogenase                                | <b>0.47</b>  | 0.44150 |
| STM3701 | secB    | export protein SecB                          | <b>-0.06</b> | 0.89259 |
| STM3701 | secB    | export protein SecB                          | <b>-0.06</b> | 0.91937 |
| STM3702 | grxC    | glutaredoxin 3                               | <b>0.01</b>  | 0.98546 |
| STM3702 | grxC    | glutaredoxin 3                               | <b>0.27</b>  | 0.46292 |
| STM3703 | yibN    | putative rhodanese-like sulfurtransferase    | <b>-0.04</b> | 0.94973 |
| STM3703 | yibN    | putative rhodanese-like sulfurtransferase    | <b>0.01</b>  | 0.98976 |
| STM3704 | pmgI    | phosphoglyceromutase                         | <b>-0.42</b> | 0.45372 |
| STM3704 | pmgI    | phosphoglyceromutase                         | <b>-0.26</b> | 0.45093 |
| STM3705 | yibP    | hypothetical protein STM3705                 | <b>0.06</b>  | 0.89164 |
| STM3705 | yibP    | hypothetical protein STM3705                 | <b>0.23</b>  | 0.57345 |
| STM3706 | yigQ    | putative periplasmic protein                 | <b>-0.56</b> | 0.23495 |
| STM3706 | yigQ    | putative periplasmic protein                 | <b>0.13</b>  | 0.77186 |
| STM3707 | yibD    | putative glycosyltransferase                 | <b>-0.10</b> | 0.82656 |
| STM3707 | yibD    | putative glycosyltransferase                 | <b>-0.13</b> | 0.74354 |
| STM3708 | tdh     | L-threonine 3-dehydrogenase                  | <b>-0.01</b> | 0.99260 |
| STM3708 | tdh     | L-threonine 3-dehydrogenase                  | <b>0.29</b>  | 0.59801 |
| STM3709 | kbl     | 2-amino-3-ketobutyrate coenzyme A ligase     | <b>0.06</b>  | 0.89668 |
| STM3709 | kbl     | 2-amino-3-ketobutyrate coenzyme A ligase     | <b>0.04</b>  | 0.91992 |
| STM3710 | rfaD    | ADP-L-glycero-D-mannoheptose-6-epimerase     | <b>0.26</b>  | 0.64590 |
| STM3710 | rfaD    | ADP-L-glycero-D-mannoheptose-6-epimerase     | <b>-0.64</b> | 0.34201 |
| STM3711 | rfaF    | ADP-heptose-LPS heptosyltransferase 1        | <b>-0.07</b> | 0.87368 |
| STM3711 | rfaF    | ADP-heptose-LPS heptosyltransferase 1        | <b>0.12</b>  | 0.75739 |
| STM3712 | rfaC    | heptosyl transferase I                       | <b>-0.19</b> | 0.72672 |
| STM3712 | rfaC    | heptosyl transferase I                       | <b>0.13</b>  | 0.72781 |
| STM3713 | rfaL    | O-antigen ligase                             | <b>0.23</b>  | 0.59509 |
| STM3713 | rfaL    | O-antigen ligase                             | <b>0.42</b>  | 0.34449 |
| STM3714 | rfaK    | putative hexose transferase                  | <b>-0.40</b> | 0.27004 |
| STM3714 | rfaK    | putative hexose transferase                  | <b>-0.21</b> | 0.59455 |
| STM3715 | rfaZ    | lipopolysaccharide core biosynthetic protein | <b>-0.23</b> | 0.75319 |

|         |         |                                                          |              |         |
|---------|---------|----------------------------------------------------------|--------------|---------|
| STM3715 | rfaZ    | lipopolysaccharide core biosynthetic protein             | <b>0.27</b>  | 0.75453 |
| STM3716 | rfaY    | lipopolysaccharide core biosynthetic protein             | <b>0.07</b>  | 0.88415 |
| STM3716 | rfaY    | lipopolysaccharide core biosynthetic protein             | <b>0.47</b>  | 0.29543 |
| STM3717 | rfaJ    | lipopolysaccharide glucosyltransferase                   | <b>-0.03</b> | 0.95059 |
| STM3717 | rfaJ    | lipopolysaccharide glucosyltransferase                   | <b>0.34</b>  | 0.41193 |
| STM3718 | rfaI    | lipopolysaccharide-alpha-1,3-D-galactosyltransferase     | <b>0.15</b>  | 0.71914 |
| STM3718 | rfaI    | lipopolysaccharide-alpha-1,3-D-galactosyltransferase     | <b>0.08</b>  | 0.84354 |
| STM3719 | rfaB    | lipopolysaccharide-1,6-D-galactosyltransferase           | <b>0.30</b>  | 0.39315 |
| STM3719 | rfaB    | lipopolysaccharide-1,6-D-galactosyltransferase           | <b>0.17</b>  | 0.66636 |
| STM3720 | yibR    | putative inner membrane protein                          | <b>-0.04</b> | 0.94552 |
| STM3720 | yibR    | putative inner membrane protein                          | <b>0.10</b>  | 0.81961 |
| STM3721 | rfaP    | lipopolysaccharide core biosynthetic protein             | <b>0.03</b>  | 0.96785 |
| STM3721 | rfaP    | lipopolysaccharide core biosynthetic protein             | <b>-0.14</b> | 0.75851 |
| STM3722 | rfaG    | glucosyltransferase I                                    | <b>0.08</b>  | 0.88018 |
| STM3722 | rfaG    | glucosyltransferase I                                    | <b>0.01</b>  | 0.99381 |
| STM3723 | rfaQ    | lipopolysaccharide core biosynthetic protein             | <b>0.10</b>  | 0.80762 |
| STM3723 | rfaQ    | lipopolysaccharide core biosynthetic protein             | <b>0.16</b>  | 0.67750 |
| STM3724 | kdtA    | 3-deoxy-D-manno-octulosonic-acid transferase             | <b>-0.25</b> | 0.51526 |
| STM3724 | kdtA    | 3-deoxy-D-manno-octulosonic-acid transferase             | <b>0.06</b>  | 0.88864 |
| STM3725 | kdtB    | phosphopantetheine adenylyltransferase                   | <b>-0.26</b> | 0.47159 |
| STM3725 | kdtB    | phosphopantetheine adenylyltransferase                   | <b>-0.15</b> | 0.75626 |
| STM3726 | mutM    | formamidopyrimidine-DNA glycosylase                      | <b>-0.22</b> | 0.67506 |
| STM3726 | mutM    | formamidopyrimidine-DNA glycosylase                      | <b>0.18</b>  | 0.76502 |
| STM3727 | rpmG    | 50S ribosomal protein L33                                | <b>-0.52</b> | 0.31195 |
| STM3727 | rpmG    | 50S ribosomal protein L33                                | <b>-0.32</b> | 0.64456 |
| STM3728 | rpmB    | 50S ribosomal protein L28                                | <b>-0.25</b> | 0.65779 |
| STM3728 | rpmB    | 50S ribosomal protein L28                                | <b>-0.07</b> | 0.92594 |
| STM3729 | radC    | DNA repair protein RadC                                  | <b>-0.31</b> | 0.46720 |
| STM3729 | radC    | DNA repair protein RadC                                  | <b>0.11</b>  | 0.78332 |
| STM3730 | dfp     | phosphopantothenoylcysteine synthase/decarboxylase       | <b>0.16</b>  | 0.68240 |
| STM3730 | dfp     | phosphopantothenoylcysteine synthase/decarboxylase       | <b>0.15</b>  | 0.68439 |
| STM3731 | dut     | deoxyuridine 5'-triphosphate nucleotidohydrolase         | <b>0.26</b>  | 0.45394 |
| STM3731 | dut     | deoxyuridine 5'-triphosphate nucleotidohydrolase         | <b>0.24</b>  | 0.70707 |
| STM3732 | slmA    | nucleoid occlusion protein                               | <b>-0.33</b> | 0.40531 |
| STM3732 | slmA    | nucleoid occlusion protein                               | <b>-0.12</b> | 0.79324 |
| STM3733 | pyrE    | orotate phosphoribosyltransferase                        | <b>-0.48</b> | 0.29866 |
| STM3733 | pyrE    | orotate phosphoribosyltransferase                        | <b>0.15</b>  | 0.68113 |
| STM3734 | rph     | ribonuclease PH                                          | <b>0.38</b>  | 0.31280 |
| STM3734 | rph     | ribonuclease PH                                          | <b>0.78</b>  | 0.22391 |
| STM3735 | yicC    | putative stress-induced protein                          | <b>-0.12</b> | 0.82956 |
| STM3735 | yicC    | putative stress-induced protein                          | <b>0.32</b>  | 0.50825 |
| STM3736 | STM3736 | putative transcriptional regulator                       | <b>-0.19</b> | 0.58694 |
| STM3736 | STM3736 | putative transcriptional regulator                       | <b>0.10</b>  | 0.84245 |
| STM3737 | STM3737 | putative Zn-dependent hydrolase                          | <b>-0.58</b> | 0.34553 |
| STM3737 | STM3737 | putative Zn-dependent hydrolase                          | <b>0.38</b>  | 0.43772 |
| STM3738 | yigC    | putative inner membrane protein                          | <b>0.11</b>  | 0.86516 |
| STM3738 | yigC    | putative inner membrane protein                          | <b>0.05</b>  | 0.91047 |
| STM3739 | yicF    | DNA ligase                                               | <b>-0.36</b> | 0.32812 |
| STM3739 | yicF    | DNA ligase                                               | <b>0.26</b>  | 0.54625 |
| STM3740 | gmk     | guanylate kinase                                         | <b>0.01</b>  | 0.97664 |
| STM3740 | gmk     | guanylate kinase                                         | <b>0.08</b>  | 0.84456 |
| STM3741 | rpoZ    | DNA-directed RNA polymerase omega subunit                | <b>-0.40</b> | 0.29871 |
| STM3741 | rpoZ    | DNA-directed RNA polymerase omega subunit                | <b>-0.14</b> | 0.72677 |
| STM3742 | spoT    | (p)ppGpp synthetase II/guanosine-3',5'-bis pyrophosphate | <b>0.09</b>  | 0.83943 |
| STM3742 | spoT    | (p)ppGpp synthetase II/guanosine-3',5'-bis pyrophosphate | <b>0.26</b>  | 0.46565 |
| STM3743 | spoU    | putative tRNA/rRNA methyltransferase                     | <b>0.02</b>  | 0.97645 |
| STM3743 | spoU    | putative tRNA/rRNA methyltransferase                     | <b>-0.04</b> | 0.95507 |
| STM3744 | recG    | DNA helicase                                             | <b>-0.21</b> | 0.65709 |
| STM3744 | recG    | DNA helicase                                             | <b>-0.33</b> | 0.51977 |
| STM3745 | STM3745 | putative cytoplasmic protein                             | <b>-0.14</b> | 0.75798 |
| STM3745 | STM3745 | putative cytoplasmic protein                             | <b>0.55</b>  | 0.37568 |

|           |           |                                               |              |         |
|-----------|-----------|-----------------------------------------------|--------------|---------|
| STM3746   | gltS      | glutamate transport protein                   | <b>-0.03</b> | 0.95650 |
| STM3746   | gltS      | glutamate transport protein                   | <b>-0.33</b> | 0.45664 |
| STM3747   | yicE      | putative purine/xanthine transport protein    | <b>-0.20</b> | 0.70307 |
| STM3747   | yicE      | putative purine/xanthine transport protein    | <b>0.27</b>  | 0.58613 |
| STM3748   | yicH      | putative inner membrane protein               | <b>-0.21</b> | 0.65012 |
| STM3748   | yicH      | putative inner membrane protein               | <b>0.40</b>  | 0.37342 |
| STM3749   | yicI      | putative alpha xylosidase                     | <b>-0.24</b> | 0.57409 |
| STM3749   | yicI      | putative alpha xylosidase                     | <b>0.58</b>  | 0.39316 |
| STM3750   | yicJ      | putative transport protein                    | <b>-0.09</b> | 0.91641 |
| STM3750   | yicJ      | putative transport protein                    | <b>-0.09</b> | 0.87909 |
| STM3751   | selC      | STM3751                                       | <b>-0.14</b> | 0.86385 |
| STM3751   | selC      | STM3751                                       | <b>0.05</b>  | 0.96286 |
| STM3752   | STM3752   | putative cytoplasmic protein                  | <b>-0.32</b> | 0.39470 |
| STM3752   | STM3752   | putative cytoplasmic protein                  | <b>0.01</b>  | 0.99260 |
| STM3753   | sugR      | ATP binding protein                           | <b>-0.09</b> | 0.84392 |
| STM3753   | sugR      | ATP binding protein                           | <b>0.60</b>  | 0.23635 |
| STM3754   | STM3754   | putative cytoplasmic protein                  | <b>0.09</b>  | 0.86190 |
| STM3754   | STM3754   | putative cytoplasmic protein                  | <b>0.09</b>  | 0.84873 |
| STM3755   | rhuM      | putative cytoplasmic protein                  | <b>-0.31</b> | 0.60311 |
| STM3755   | rhuM      | putative cytoplasmic protein                  | <b>0.27</b>  | 0.62873 |
| STM3756   | rmbA      | putative cytoplasmic protein                  | <b>0.02</b>  | 0.97117 |
| STM3756   | rmbA      | putative cytoplasmic protein                  | <b>0.02</b>  | 0.95980 |
| STM3757   | misL      | putative autotransporter                      | <b>0.46</b>  | 0.30326 |
| STM3757   | misL      | putative autotransporter                      | <b>0.93</b>  | 0.28861 |
| STM3758   | fidL      | putative inner membrane protein               | <b>0.01</b>  | 0.98718 |
| STM3758   | fidL      | putative inner membrane protein               | <b>-1.06</b> | 0.63076 |
| STM3759,S | marT      | putative transcriptional regulator            | <b>-0.22</b> | 0.71971 |
| STM3759,S | marT      | putative transcriptional regulator            | <b>0.26</b>  | 0.61809 |
| STM3761   | slsA      | putative inner membrane protein               | <b>-0.85</b> | 0.15859 |
| STM3761   | slsA      | putative inner membrane protein               | <b>-0.07</b> | 0.91484 |
| STM3762   | cigR      | putative inner membrane protein               | <b>-0.52</b> | 0.64422 |
| STM3762   | cigR      | putative inner membrane protein               | <b>-0.10</b> | 0.83499 |
| STM3763   | mgtB      | Mg2+ transporter                              | <b>-0.37</b> | 0.34070 |
| STM3763   | mgtB      | Mg2+ transporter                              | <b>0.50</b>  | 0.38425 |
| STM3764   | mgtC      | Mg2+ transport protein                        | <b>-0.86</b> | 0.25759 |
| STM3764   | mgtC      | Mg2+ transport protein                        | <b>0.13</b>  | 0.75851 |
| STM3765   | yicL      | putative permease                             | <b>-0.11</b> | 0.87110 |
| STM3765   | yicL      | putative permease                             | <b>0.06</b>  | 0.93491 |
| STM3766   | STM3766   | putative cytoplasmic protein                  | <b>-0.68</b> | 0.14183 |
| STM3766   | STM3766   | putative cytoplasmic protein                  | <b>0.35</b>  | 0.47541 |
| STM3767   | STM3767   | putative cytoplasmic protein                  | <b>-0.30</b> | 0.49707 |
| STM3767   | STM3767   | putative cytoplasmic protein                  | <b>0.36</b>  | 0.45477 |
| STM3768   | STM3768   | putative selenocysteine synthase              | <b>-0.06</b> | 0.94050 |
| STM3768   | STM3768   | putative selenocysteine synthase              | <b>0.79</b>  | 0.33356 |
| STM3769,S | STM3769,S | putative phosphotransferase system enzyme II  | <b>-0.06</b> | 0.91756 |
| STM3769,S | STM3769,S | putative phosphotransferase system enzyme II  | <b>0.57</b>  | 0.37678 |
| STM3770   | STM3770   | putative phosphotransferase system enzyme IIC | <b>0.09</b>  | 0.86443 |
| STM3770   | STM3770   | putative phosphotransferase system enzyme IIC | <b>0.08</b>  | 0.90347 |
| STM3771   | STM3771   | putative phosphotransferase system enzyme IIB | <b>-0.32</b> | 0.63101 |
| STM3771   | STM3771   | putative phosphotransferase system enzyme IIB | <b>0.56</b>  | 0.32295 |
| STM3772   | STM3772   | putative phosphotransferase system enzyme IIA | <b>0.34</b>  | 0.42591 |
| STM3772   | STM3772   | putative phosphotransferase system enzyme IIA | <b>1.22</b>  | 0.14030 |
| STM3773   | STM3773   | putative transcriptional regulator            | <b>0.05</b>  | 0.94470 |
| STM3773   | STM3773   | putative transcriptional regulator            | <b>1.28</b>  | 0.14154 |
| STM3774   | STM3774   | putative inner membrane protein               | <b>-0.24</b> | 0.89405 |
| STM3774   | STM3774   | putative inner membrane protein               | <b>1.29</b>  | 0.22602 |
| STM3775   | STM3775   | putative glycosyl hydrolase                   | <b>-0.01</b> | 0.99449 |
| STM3775   | STM3775   | putative glycosyl hydrolase                   | <b>0.78</b>  | 0.33703 |
| STM3776   | yicM      | putative transport protein                    | <b>-0.81</b> | 0.24414 |
| STM3776   | yicM      | putative transport protein                    | <b>-0.08</b> | 0.86495 |
| STM3777   | STM3777   | putative cytoplasmic protein                  | <b>-0.44</b> | 0.26213 |
| STM3777   | STM3777   | putative cytoplasmic protein                  | <b>0.41</b>  | 0.39354 |
| STM3778   | STM3778   | putative DNA-binding protein                  | <b>-0.34</b> | 0.63148 |

|            |            |                                                       |              |         |
|------------|------------|-------------------------------------------------------|--------------|---------|
| STM3778    | STM3778    | putative DNA-binding protein                          | <b>0.38</b>  | 0.57021 |
| STM3779    | STM3779    | putative phosphotransferase system HPr protein        | <b>-0.26</b> | 0.57021 |
| STM3779    | STM3779    | putative phosphotransferase system HPr protein        | <b>0.20</b>  | 0.72146 |
| STM3780    | STM3780    | hypothetical protein STM3780                          | <b>-1.10</b> | 0.08174 |
| STM3780    | STM3780    | hypothetical protein STM3780                          | <b>0.56</b>  | 0.25454 |
| STM3781    | STM3781    | putative sugar kinase                                 | <b>-0.57</b> | 0.34201 |
| STM3781    | STM3781    | putative sugar kinase                                 | <b>0.23</b>  | 0.59497 |
|            |            | putative PTS system galactitol-specific enzyme IIC    |              |         |
| STM3782    | STM3782    | component                                             | <b>-0.47</b> | 0.29539 |
|            |            | putative PTS system galactitol-specific enzyme IIC    |              |         |
| STM3782    | STM3782    | component                                             | <b>-0.34</b> | 0.69319 |
| STM3783    | STM3783    | putative periplasmic protein                          | <b>-0.30</b> | 0.46042 |
| STM3783    | STM3783    | putative periplasmic protein                          | <b>0.01</b>  | 0.99152 |
|            |            | putative phosphotransferase system mannitol/fructose- |              |         |
| STM3784    | STM3784    | specific IIA                                          | <b>0.08</b>  | 0.87456 |
|            |            | putative phosphotransferase system mannitol/fructose- |              |         |
| STM3784    | STM3784    | specific IIA                                          | <b>0.35</b>  | 0.45664 |
| STM3785    | STM3785    | putative regulatory protein                           | <b>-0.31</b> | 0.46385 |
| STM3785    | STM3785    | putative regulatory protein                           | <b>0.17</b>  | 0.79260 |
| STM3786    | yicN       | putative inner membrane protein                       | <b>-0.06</b> | 0.88937 |
| STM3786    | yicN       | putative inner membrane protein                       | <b>0.19</b>  | 0.64489 |
| STM3787    | uhpT       | hexose phosphate transport protein                    | <b>-0.23</b> | 0.59675 |
| STM3787    | uhpT       | hexose phosphate transport protein                    | <b>0.37</b>  | 0.72299 |
| STM3788    | uhpC       | regulatory protein                                    | <b>-0.24</b> | 0.52504 |
| STM3788    | uhpC       | regulatory protein                                    | <b>0.09</b>  | 0.89227 |
| STM3789    | uhpB       | sensory histidine kinase                              | <b>-0.13</b> | 0.74374 |
| STM3789    | uhpB       | sensory histidine kinase                              | <b>-0.04</b> | 0.94360 |
| STM3790    | uhpA       | response regulator                                    | <b>-0.39</b> | 0.39357 |
| STM3790    | uhpA       | response regulator                                    | <b>-0.07</b> | 0.86947 |
| STM3791    | STM3791    | putative cytoplasmic protein                          | <b>0.23</b>  | 0.55656 |
| STM3791    | STM3791    | putative cytoplasmic protein                          | <b>0.48</b>  | 0.39987 |
| STM3792    | STM3792    | putative L-fucose permease                            | <b>0.16</b>  | 0.77677 |
| STM3792    | STM3792    | putative L-fucose permease                            | <b>0.02</b>  | 0.95980 |
| STM3793    | STM3793    | putative sugar kinase                                 | <b>-0.10</b> | 0.87016 |
| STM3793    | STM3793    | putative sugar kinase                                 | <b>-0.18</b> | 0.76008 |
| STM3794    | STM3794    | putative regulatory protein                           | <b>-0.14</b> | 0.70966 |
| STM3794    | STM3794    | putative regulatory protein                           | <b>0.23</b>  | 0.55008 |
| STM3795    | ilvN       | acetolactate synthase small subunit                   | <b>0.01</b>  | 0.98958 |
| STM3795    | ilvN       | acetolactate synthase small subunit                   | <b>0.65</b>  | 0.21933 |
| STM3796    | ilvB       | acetolactate synthase large subunit                   | <b>-0.06</b> | 0.96447 |
| STM3796    | ilvB       | acetolactate synthase large subunit                   | <b>0.68</b>  | 0.42958 |
| STM3796A,S | STM3796A,S | integral membrane protein                             | <b>0.49</b>  | 0.24722 |
| STM3796A,S | STM3796A,S | integral membrane protein                             | <b>1.12</b>  | 0.19398 |
| STM3797    | ilvL       | ilvB operon leader peptide                            | <b>-0.39</b> | 0.47997 |
| STM3797    | ilvL       | ilvB operon leader peptide                            | <b>0.38</b>  | 0.44808 |
| STM3798    | emrD       | multidrug transport protein                           | <b>-0.46</b> | 0.45625 |
| STM3798    | emrD       | multidrug transport protein                           | <b>0.09</b>  | 0.82350 |
| STM3799    | STM3799    | putative periplasmic protein                          | <b>-0.09</b> | 0.93023 |
| STM3799    | STM3799    | putative periplasmic protein                          | <b>-0.20</b> | 0.70726 |
| STM3800    | dsdC       | transcriptional activator                             | <b>0.15</b>  | 0.73862 |
| STM3800    | dsdC       | transcriptional activator                             | <b>0.18</b>  | 0.67012 |
| STM3801    | dsdX       | putative transport protein                            | <b>0.27</b>  | 0.46772 |
| STM3801    | dsdX       | putative transport protein                            | <b>0.58</b>  | 0.22621 |
| STM3802    | dsdA       | D-serine dehydratase                                  | <b>-0.29</b> | 0.44208 |
| STM3802    | dsdA       | D-serine dehydratase                                  | <b>0.83</b>  | 0.19398 |
| STM3803    | yidF       | putative cytoplasmic protein                          | <b>0.19</b>  | 0.65753 |
| STM3803    | yidF       | putative cytoplasmic protein                          | <b>0.61</b>  | 0.27312 |
| STM3804    | yidG       | putative inner membrane protein                       | <b>-0.29</b> | 0.54573 |
| STM3804    | yidG       | putative inner membrane protein                       | <b>0.31</b>  | 0.51545 |
| STM3805    | yidH       | putative inner membrane protein                       | <b>-0.08</b> | 0.91170 |
| STM3805    | yidH       | putative inner membrane protein                       | <b>0.15</b>  | 0.76008 |
| STM3807    | yidE       | hypothetical protein STM3807                          | <b>-0.36</b> | 0.35824 |
| STM3807    | yidE       | hypothetical protein STM3807                          | <b>0.09</b>  | 0.86176 |

|           |         |                                                    |              |         |
|-----------|---------|----------------------------------------------------|--------------|---------|
| STM3808,S | ibpB    | small heat shock protein                           | <b>-0.06</b> | 0.95412 |
| STM3808,S | ibpB    | small heat shock protein                           | <b>0.94</b>  | 0.32315 |
| STM3809,S | ibpA    | small heat shock protein                           | <b>-0.60</b> | 0.41626 |
| STM3809,S | ibpA    | small heat shock protein                           | <b>-0.67</b> | 0.24414 |
| STM3810   | yidQ    | putative outer membrane lipoprotein                | <b>-0.80</b> | 0.18734 |
| STM3810   | yidQ    | putative outer membrane lipoprotein                | <b>-0.48</b> | 0.55938 |
| STM3811   | yidR    | putative cytoplasmic protein                       | <b>0.04</b>  | 0.94617 |
| STM3811   | yidR    | putative cytoplasmic protein                       | <b>-0.22</b> | 0.75403 |
| STM3812   | ccmH    | putative heme lyase subunit                        | <b>-0.25</b> | 0.58613 |
| STM3812   | ccmH    | putative heme lyase subunit                        | <b>0.35</b>  | 0.53840 |
| STM3813   | ccmG    | heme lyase disulfide oxidoreductase                | <b>-0.56</b> | 0.41717 |
| STM3813   | ccmG    | heme lyase disulfide oxidoreductase                | <b>-0.25</b> | 0.57604 |
| STM3813   | ccmG    | heme lyase disulfide oxidoreductase                | <b>-0.33</b> | 0.46629 |
| STM3813   | ccmG    | heme lyase disulfide oxidoreductase                | <b>0.13</b>  | 0.75798 |
| STM3814   | ccmF    | cytochrome c-type biogenesis protein               | <b>0.59</b>  | 0.76720 |
| STM3814   | ccmF    | cytochrome c-type biogenesis protein               | <b>0.16</b>  | 0.94045 |
| STM3814   | ccmF    | cytochrome c-type biogenesis protein               | <b>0.71</b>  | 0.26429 |
| STM3814   | ccmF    | cytochrome c-type biogenesis protein               | <b>0.88</b>  | 0.12727 |
| STM3815   | ccmE    | periplasmic heme-dependent peroxidase              | <b>-0.57</b> | 0.36311 |
| STM3815   | ccmE    | periplasmic heme-dependent peroxidase              | <b>-0.14</b> | 0.72781 |
| STM3815   | ccmE    | periplasmic heme-dependent peroxidase              | <b>-0.19</b> | 0.64331 |
| STM3815   | ccmE    | periplasmic heme-dependent peroxidase              | <b>0.42</b>  | 0.47603 |
| STM3816   | ccmD    | heme exporter protein C                            | <b>-0.58</b> | 0.59695 |
| STM3816   | ccmD    | heme exporter protein C                            | <b>-0.33</b> | 0.40701 |
| STM3816   | ccmD    | heme exporter protein C                            | <b>0.26</b>  | 0.64838 |
| STM3816   | ccmD    | heme exporter protein C                            | <b>0.41</b>  | 0.51446 |
| STM3817   | ccmC    | heme exporter protein                              | <b>-1.03</b> | 0.11224 |
| STM3817   | ccmC    | heme exporter protein                              | <b>-1.21</b> | 0.13206 |
| STM3817   | ccmC    | heme exporter protein                              | <b>-0.60</b> | 0.18763 |
| STM3817   | ccmC    | heme exporter protein                              | <b>-0.07</b> | 0.86414 |
| STM3818   | ccmB    | heme exporter protein                              | <b>-0.78</b> | 0.24313 |
| STM3818   | ccmB    | heme exporter protein                              | <b>-0.75</b> | 0.26910 |
| STM3818   | ccmB    | heme exporter protein                              | <b>-0.32</b> | 0.41154 |
| STM3818   | ccmB    | heme exporter protein                              | <b>-0.35</b> | 0.47838 |
| STM3820   | STM3820 | putative cytochrome c peroxidase                   | <b>-0.63</b> | 0.25020 |
| STM3820   | STM3820 | putative cytochrome c peroxidase                   | <b>-0.50</b> | 0.40972 |
| STM3821   | torD    | chaperone protein TorD                             | <b>-0.50</b> | 0.30748 |
| STM3821   | torD    | chaperone protein TorD                             | <b>0.40</b>  | 0.54925 |
| STM3822   | torA    | trimethylamine N-oxide reductase subunit           | <b>-0.88</b> | 0.13645 |
| STM3822   | torA    | trimethylamine N-oxide reductase subunit           | <b>0.51</b>  | 0.33651 |
|           |         | trimethylamine N-oxide reductase cytochrome c-like |              |         |
| STM3823   | torC    | subunit                                            | <b>-0.47</b> | 0.36399 |
|           |         | trimethylamine N-oxide reductase cytochrome c-like |              |         |
| STM3823   | torC    | subunit                                            | <b>0.80</b>  | 0.39364 |
| STM3824   | torR    | response regulator                                 | <b>-0.15</b> | 0.79755 |
| STM3824   | torR    | response regulator                                 | <b>0.08</b>  | 0.86580 |
| STM3825   | torT    | periplasmic sensor                                 | <b>-0.25</b> | 0.61057 |
| STM3825   | torT    | periplasmic sensor                                 | <b>0.01</b>  | 0.98564 |
| STM3826   | torS    | sensor kinase                                      | <b>-0.28</b> | 0.62503 |
| STM3826   | torS    | sensor kinase                                      | <b>1.20</b>  | 0.13645 |
| STM3827   | dgoT    | D-galactonate transport protein                    | <b>0.06</b>  | 0.90605 |
| STM3827   | dgoT    | D-galactonate transport protein                    | <b>0.60</b>  | 0.36414 |
|           |         | 2-oxo-3-deoxygalactonate 6-phosphate               |              |         |
| STM3828   | dgoA    | aldolase/galactonate                               | <b>0.74</b>  | 0.18140 |
|           |         | 2-oxo-3-deoxygalactonate 6-phosphate               |              |         |
| STM3828   | dgoA    | aldolase/galactonate                               | <b>1.01</b>  | 0.25759 |
| STM3829   | dgoK    | 2-oxo-3-deoxygalactonate kinase                    | <b>-0.20</b> | 0.73469 |
| STM3829   | dgoK    | 2-oxo-3-deoxygalactonate kinase                    | <b>0.87</b>  | 0.13206 |
| STM3830   | dgoR    | galactonate operon transcriptional repressor       | <b>-0.41</b> | 0.27312 |
| STM3830   | dgoR    | galactonate operon transcriptional repressor       | <b>0.74</b>  | 0.22087 |
| STM3831   | yidA    | putative hydrolase                                 | <b>-0.13</b> | 0.76283 |
| STM3831   | yidA    | putative hydrolase                                 | <b>0.07</b>  | 0.91075 |
| STM3832   | STM3832 | putative permease                                  | <b>0.17</b>  | 0.75512 |

|           |           |                                                                    |              |         |
|-----------|-----------|--------------------------------------------------------------------|--------------|---------|
| STM3832   | STM3832   | putative permease                                                  | <b>0.20</b>  | 0.63169 |
| STM3833   | STM3833   | putative mandelate racemase                                        | <b>-0.75</b> | 0.19236 |
| STM3833   | STM3833   | putative mandelate racemase                                        | <b>-0.15</b> | 0.72843 |
| STM3834   | STM3834   | putative transcriptional regulator                                 | <b>-0.34</b> | 0.36414 |
| STM3834   | STM3834   | putative transcriptional regulator                                 | <b>-0.26</b> | 0.45111 |
| STM3835   | gyrB      | DNA gyrase subunit B                                               | <b>-0.40</b> | 0.46927 |
| STM3835   | gyrB      | DNA gyrase subunit B                                               | <b>-0.31</b> | 0.45423 |
| STM3836   | recF      | recombination protein F                                            | <b>0.05</b>  | 0.90612 |
| STM3836   | recF      | recombination protein F                                            | <b>0.12</b>  | 0.75831 |
| STM3837   | dnaN      | DNA polymerase III subunit beta                                    | <b>-0.64</b> | 0.17359 |
| STM3837   | dnaN      | DNA polymerase III subunit beta                                    | <b>-0.02</b> | 0.97720 |
| STM3838   | dnaA      | chromosomal replication initiation protein                         | <b>-0.23</b> | 0.60937 |
| STM3838   | dnaA      | chromosomal replication initiation protein                         | <b>-0.01</b> | 0.99268 |
| STM3839   | rpmH      | 50S ribosomal protein L34                                          | <b>0.20</b>  | 0.72247 |
| STM3839   | rpmH      | 50S ribosomal protein L34                                          | <b>0.76</b>  | 0.21015 |
| STM3840   | rnpA      | ribonuclease P                                                     | <b>0.18</b>  | 0.67816 |
| STM3840   | rnpA      | ribonuclease P                                                     | <b>0.45</b>  | 0.33971 |
| STM3842   | yidC      | inner membrane protein translocase component YidC                  | <b>-0.20</b> | 0.61679 |
| STM3842   | yidC      | inner membrane protein translocase component YidC                  | <b>0.61</b>  | 0.18873 |
| STM3843   | trmE      | tRNA modification GTPase                                           | <b>-0.45</b> | 0.22087 |
| STM3843   | trmE      | tRNA modification GTPase                                           | <b>0.20</b>  | 0.74626 |
| STM3845   | STM3845   | putative inner membrane protein                                    | <b>-0.35</b> | 0.38351 |
| STM3845   | STM3845   | putative inner membrane protein                                    | <b>0.02</b>  | 0.98332 |
| STM3846,s | STM3846,s | putative reverse transcriptase                                     | <b>-0.47</b> | 0.35824 |
| STM3846,s | STM3846,s | putative reverse transcriptase                                     | <b>-0.12</b> | 0.82642 |
| STM3847   | yidY      | putative transport protein                                         | <b>-0.55</b> | 0.35178 |
| STM3847   | yidY      | putative transport protein                                         | <b>0.75</b>  | 0.15276 |
| STM3848   | yidZ      | putative transcriptional regulator                                 | <b>-0.09</b> | 0.86190 |
| STM3848   | yidZ      | putative transcriptional regulator                                 | <b>0.80</b>  | 0.18248 |
| STM3849   | yieE      | putative cytoplasmic protein                                       | <b>0.00</b>  | 0.99540 |
| STM3849   | yieE      | putative cytoplasmic protein                                       | <b>0.16</b>  | 0.78934 |
| STM3850   | yieF      | putative oxidoreductase                                            | <b>-0.20</b> | 0.65408 |
| STM3850   | yieF      | putative oxidoreductase                                            | <b>0.05</b>  | 0.93340 |
| STM3851,S | yieG      | hypothetical protein STM3851,S                                     | <b>-0.20</b> | 0.64590 |
| STM3851,S | yieG      | hypothetical protein STM3851,S                                     | <b>0.14</b>  | 0.77719 |
| STM3852   | yieH      | putative phosphatase/phosphohexomutase                             | <b>-0.35</b> | 0.53840 |
| STM3852   | yieH      | putative phosphatase/phosphohexomutase                             | <b>-0.06</b> | 0.89546 |
| STM3853   | phoU      | high-affinity phosphate uptake regulatory protein                  | <b>-0.13</b> | 0.79096 |
| STM3853   | phoU      | high-affinity phosphate uptake regulatory protein                  | <b>-0.01</b> | 0.99213 |
| STM3854   | pstB      | high-affinity phosphate transporter                                | <b>-0.54</b> | 0.18851 |
| STM3854   | pstB      | high-affinity phosphate transporter                                | <b>0.10</b>  | 0.79308 |
| STM3855   | pstA      | high-affinity phosphate transporter                                | <b>0.09</b>  | 0.90534 |
| STM3855   | pstA      | high-affinity phosphate transporter                                | <b>-0.04</b> | 0.96018 |
| STM3856   | pstC      | high-affinity phosphate transporter                                | <b>-0.55</b> | 0.24319 |
| STM3856   | pstC      | high-affinity phosphate transporter                                | <b>-0.28</b> | 0.61201 |
| STM3857   | pstS      | high-affinity phosphate transporter                                | <b>0.05</b>  | 0.94417 |
| STM3857   | pstS      | high-affinity phosphate transporter                                | <b>0.24</b>  | 0.77025 |
| STM3858   | STM3858   | putative phosphotransferase system fructose-specific component IIB | <b>-0.17</b> | 0.75978 |
| STM3858   | STM3858   | putative phosphotransferase system fructose-specific component IIB | <b>0.39</b>  | 0.37942 |
| STM3859   | aroE      | shikimate 5-dehydrogenase                                          | <b>0.04</b>  | 0.93525 |
| STM3859   | aroE      | shikimate 5-dehydrogenase                                          | <b>0.41</b>  | 0.40749 |
| STM3860   | STM3860   | putative dipeptide/oligopeptide/nickel ABC-type transport system   | <b>0.06</b>  | 0.91047 |
| STM3860   | STM3860   | putative dipeptide/oligopeptide/nickel ABC-type transport system   | <b>0.25</b>  | 0.50267 |
| STM3861   | glmS      | D-fructose-6-phosphate amidotransferase                            | <b>-0.19</b> | 0.65709 |
| STM3861   | glmS      | D-fructose-6-phosphate amidotransferase                            | <b>0.18</b>  | 0.70765 |
| STM3862   | glmU      | bifunctional N-acetylglucosamine-1-phosphate                       | <b>-0.13</b> | 0.75158 |
| STM3862   | glmU      | bifunctional N-acetylglucosamine-1-phosphate                       | <b>0.31</b>  | 0.51421 |
| STM3863   | STM3863   | putative permease                                                  | <b>-0.05</b> | 0.91055 |
| STM3863   | STM3863   | putative permease                                                  | <b>-0.10</b> | 0.83829 |

|           |      |                                               |              |         |
|-----------|------|-----------------------------------------------|--------------|---------|
| STM3864   | atpC | ATP synthase subunit epsilon                  | <b>-0.57</b> | 0.30140 |
| STM3864   | atpC | ATP synthase subunit epsilon                  | <b>-0.14</b> | 0.74995 |
| STM3865   | atpD | ATP synthase subunit B                        | <b>-0.10</b> | 0.79719 |
| STM3865   | atpD | ATP synthase subunit B                        | <b>0.23</b>  | 0.58694 |
| STM3866   | atpG | ATP synthase subunit C                        | <b>0.01</b>  | 0.99449 |
| STM3866   | atpG | ATP synthase subunit C                        | <b>0.58</b>  | 0.19811 |
| STM3867   | atpA | ATP synthase subunit A                        | <b>0.01</b>  | 0.98352 |
| STM3867   | atpA | ATP synthase subunit A                        | <b>0.76</b>  | 0.15438 |
| STM3868   | atpH | ATP synthase subunit D                        | <b>0.34</b>  | 0.35619 |
| STM3868   | atpH | ATP synthase subunit D                        | <b>0.40</b>  | 0.31146 |
| STM3869   | atpF | ATP synthase subunit B                        | <b>0.68</b>  | 0.23879 |
| STM3869   | atpF | ATP synthase subunit B                        | <b>0.42</b>  | 0.36942 |
| STM3870   | atpE | ATP synthase subunit C                        | <b>0.67</b>  | 0.15276 |
| STM3870   | atpE | ATP synthase subunit C                        | <b>0.58</b>  | 0.22283 |
| STM3871   | atpB | ATP synthase subunit A                        | <b>0.54</b>  | 0.19967 |
| STM3871   | atpB | ATP synthase subunit A                        | <b>0.67</b>  | 0.30715 |
| STM3871   | atpB | ATP synthase subunit A                        | <b>0.44</b>  | 0.27378 |
| STM3871   | atpB | ATP synthase subunit A                        | <b>0.54</b>  | 0.52712 |
| STM3872   | atpI | ATP synthase subunit I                        | <b>0.28</b>  | 0.47937 |
| STM3872   | atpI | ATP synthase subunit I                        | <b>0.50</b>  | 0.20202 |
| STM3873,S | gidB | glucose-inhibited division protein B          | <b>0.01</b>  | 0.99156 |
| STM3873,S | gidB | glucose-inhibited division protein B          | <b>0.39</b>  | 0.33587 |
| STM3874   | gidA | glucose-inhibited division protein A          | <b>-0.17</b> | 0.68232 |
| STM3874   | gidA | glucose-inhibited division protein A          | <b>0.38</b>  | 0.31677 |
| STM3875   | mioC | flavodoxin                                    | <b>-0.31</b> | 0.38317 |
| STM3875   | mioC | flavodoxin                                    | <b>0.28</b>  | 0.58445 |
| STM3876   | asnC | transcriptional regulator                     | <b>-0.24</b> | 0.62619 |
| STM3876   | asnC | transcriptional regulator                     | <b>0.09</b>  | 0.90766 |
| STM3877   | asnA | asparagine synthetase AsnA                    | <b>-0.27</b> | 0.52360 |
| STM3877   | asnA | asparagine synthetase AsnA                    | <b>-0.15</b> | 0.79134 |
| STM3878,S | yeiM | putative inner membrane protein               | <b>0.05</b>  | 0.93974 |
| STM3878,S | yeiM | putative inner membrane protein               | <b>0.64</b>  | 0.35010 |
| STM3879   | yeiN | putative regulatory protein                   | <b>0.10</b>  | 0.83899 |
| STM3879   | yeiN | putative regulatory protein                   | <b>0.83</b>  | 0.11913 |
| STM3880   | kup  | low-affinity potassium transport protein      | <b>0.92</b>  | 0.17074 |
| STM3880   | kup  | low-affinity potassium transport protein      | <b>0.94</b>  | 0.14285 |
| STM3881   | rbsD | high-affinity D-ribose transport protein      | <b>1.01</b>  | 0.19142 |
| STM3881   | rbsD | high-affinity D-ribose transport protein      | <b>1.14</b>  | 0.12966 |
| STM3882   | rbsA | high-affinity D-ribose transport protein      | <b>0.99</b>  | 0.19398 |
| STM3882   | rbsA | high-affinity D-ribose transport protein      | <b>1.14</b>  | 0.25020 |
| STM3883   | rbsC | component                                     | <b>1.02</b>  | 0.36654 |
| STM3883   | rbsC | ribose high-affinity ABC transporter permease | <b>1.30</b>  | 0.25543 |
| STM3884   | rbsB | D-ribose transport protein                    | <b>1.00</b>  | 0.34541 |
| STM3884   | rbsB | D-ribose transport protein                    | <b>1.15</b>  | 0.25433 |
| STM3885   | rbsK | ribokinase                                    | <b>0.55</b>  | 0.53399 |
| STM3885   | rbsK | ribokinase                                    | <b>0.57</b>  | 0.45367 |
| STM3886   | rbsR | rbs operon transcriptional repressor          | <b>0.49</b>  | 0.39635 |
| STM3886   | rbsR | rbs operon transcriptional repressor          | <b>0.69</b>  | 0.20341 |
| STM3887   | yeiO | putative transport protein                    | <b>0.17</b>  | 0.65025 |
| STM3887   | yeiO | putative transport protein                    | <b>0.29</b>  | 0.45351 |
| STM3888   | yeiP | putative regulatory protein                   | <b>-0.37</b> | 0.40020 |
| STM3888   | yeiP | putative regulatory protein                   | <b>-0.64</b> | 0.22849 |
| STM3891   | rrlC | STM3891                                       | <b>-0.54</b> | 0.21880 |
| STM3891   | rrlC | STM3891                                       | <b>-0.61</b> | 0.16534 |
| STM3895   | aspT | STM3895                                       | <b>-0.81</b> | 0.21360 |
| STM3895   | aspT | STM3895                                       | <b>-0.32</b> | 0.63235 |
| STM3895   | aspT | STM3895                                       | <b>-0.46</b> | 0.35955 |
| STM3895   | aspT | STM3895                                       | <b>-0.26</b> | 0.65451 |
| STM3895   | aspT | STM3895                                       | <b>-0.26</b> | 0.62403 |
| STM3895   | aspT | STM3895                                       | <b>-0.16</b> | 0.75978 |
| STM3896   | trpT | STM3896                                       | <b>-0.50</b> | 0.24444 |

|         |         |                                                        |              |         |
|---------|---------|--------------------------------------------------------|--------------|---------|
| STM3896 | trpT    | STM3896                                                | <b>-0.29</b> | 0.57021 |
| STM3897 | yifA    | transcriptional regulator HdfR                         | <b>-0.57</b> | 0.19048 |
| STM3897 | yifA    | transcriptional regulator HdfR                         | <b>-0.42</b> | 0.31280 |
| STM3898 | yifE    | putative transcriptional regulator                     | <b>-0.36</b> | 0.52487 |
| STM3898 | yifE    | putative transcriptional regulator                     | <b>-0.46</b> | 0.29064 |
| STM3899 | yifB    | putative magnesium chelatase subunit ChII              | <b>0.23</b>  | 0.74005 |
| STM3899 | yifB    | putative magnesium chelatase subunit ChII              | <b>0.40</b>  | 0.46720 |
| STM3901 | ilvG    | acetolactate synthase II large subunit                 | <b>-0.07</b> | 0.91272 |
| STM3901 | ilvG    | acetolactate synthase II large subunit                 | <b>0.19</b>  | 0.68439 |
| STM3902 | ilvM    | acetolactate synthase II small subunit                 | <b>0.12</b>  | 0.80306 |
| STM3902 | ilvM    | acetolactate synthase II small subunit                 | <b>0.37</b>  | 0.44208 |
| STM3903 | ilvE    | branched-chain amino acid aminotransferase             | <b>0.07</b>  | 0.87826 |
| STM3903 | ilvE    | branched-chain amino acid aminotransferase             | <b>0.97</b>  | 0.13112 |
| STM3904 | ilvD    | dihydroxy-acid dehydratase                             | <b>-0.04</b> | 0.91937 |
| STM3904 | ilvD    | dihydroxy-acid dehydratase                             | <b>0.10</b>  | 0.79668 |
| STM3905 | ilvA    | threonine dehydratase                                  | <b>-0.45</b> | 0.30229 |
| STM3905 | ilvA    | threonine dehydratase                                  | <b>-0.37</b> | 0.33651 |
| STM3906 | STM3906 | putative cytoplasmic protein                           | <b>0.08</b>  | 0.91909 |
| STM3906 | STM3906 | putative cytoplasmic protein                           | <b>0.65</b>  | 0.23423 |
| STM3907 | STM3907 | putative cytoplasmic protein                           | <b>-0.12</b> | 0.83503 |
| STM3907 | STM3907 | putative cytoplasmic protein                           | <b>-0.02</b> | 0.96687 |
| STM3908 | ilvY    | regulatory protein                                     | <b>-0.15</b> | 0.76883 |
| STM3908 | ilvY    | regulatory protein                                     | <b>-0.10</b> | 0.86385 |
| STM3909 | ilvC    | ketol-acid reductoisomerase                            | <b>-0.87</b> | 0.11690 |
| STM3909 | ilvC    | ketol-acid reductoisomerase                            | <b>-0.10</b> | 0.91139 |
| STM3910 | ppiC    | peptidyl-prolyl cis-trans isomerase C                  | <b>-0.35</b> | 0.36703 |
| STM3910 | ppiC    | peptidyl-prolyl cis-trans isomerase C                  | <b>0.44</b>  | 0.23164 |
| STM3911 | STM3911 | putative inner membrane protein                        | <b>-0.15</b> | 0.72170 |
| STM3911 | STM3911 | putative inner membrane protein                        | <b>0.25</b>  | 0.59924 |
| STM3912 | rep     | ATP-dependent DNA helicase rep                         | <b>-0.56</b> | 0.17139 |
| STM3912 | rep     | ATP-dependent DNA helicase rep                         | <b>-0.10</b> | 0.84179 |
| STM3913 | gppA    | guanosine pentaphosphatase/exopolyphosphatase          | <b>-0.58</b> | 0.22533 |
| STM3913 | gppA    | guanosine pentaphosphatase/exopolyphosphatase          | <b>0.03</b>  | 0.96785 |
| STM3914 | rhIB    | ATP-dependent RNA helicase                             | <b>-0.10</b> | 0.80987 |
| STM3914 | rhIB    | ATP-dependent RNA helicase                             | <b>0.26</b>  | 0.47735 |
| STM3915 | trxA    | thioredoxin                                            | <b>-0.14</b> | 0.71550 |
| STM3915 | trxA    | thioredoxin                                            | <b>-0.24</b> | 0.61316 |
| STM3917 | rho     | transcription termination factor Rho                   | <b>-0.18</b> | 0.66594 |
| STM3917 | rho     | transcription termination factor Rho                   | <b>0.12</b>  | 0.80077 |
| STM3918 | rfe     | undecaprenyl-phosphate N-acetylglucosaminyltransferase | <b>-0.20</b> | 0.63482 |
| STM3918 | rfe     | undecaprenyl-phosphate N-acetylglucosaminyltransferase | <b>-0.11</b> | 0.86385 |
| STM3919 | wzzE    | enterobacterial common antigen chain length regulator  | <b>-0.08</b> | 0.84099 |
| STM3919 | wzzE    | enterobacterial common antigen chain length regulator  | <b>0.17</b>  | 0.63235 |
| STM3920 | wecB    | UDP-N-acetyl glucosamine-2-epimerase                   | <b>-0.06</b> | 0.89661 |
| STM3920 | wecB    | UDP-N-acetyl glucosamine-2-epimerase                   | <b>-0.46</b> | 0.24515 |
| STM3921 | wecC    | UDP-N-acetyl-D-mannosaminuronic acid dehydrogenase     | <b>-0.52</b> | 0.22602 |
| STM3921 | wecC    | UDP-N-acetyl-D-mannosaminuronic acid dehydrogenase     | <b>-0.19</b> | 0.67012 |
| STM3922 | rffG    | dTDP-glucose 4,6-dehydratase                           | <b>-0.32</b> | 0.45925 |
| STM3922 | rffG    | dTDP-glucose 4,6-dehydratase                           | <b>0.00</b>  | 0.99703 |
| STM3923 | rffH    | glucose-1-phosphate thymidyl transferase               | <b>-0.10</b> | 0.81862 |
| STM3923 | rffH    | glucose-1-phosphate thymidyl transferase               | <b>0.08</b>  | 0.87297 |
| STM3924 | wecD    | lipopolysaccharide biosynthetic protein                | <b>-0.31</b> | 0.47880 |
| STM3924 | wecD    | lipopolysaccharide biosynthetic protein                | <b>-0.25</b> | 0.53840 |
| STM3925 | wecE    | TDP-4-oxo-6-deoxy-D-glucose transaminase               | <b>-0.26</b> | 0.48854 |
| STM3925 | wecE    | TDP-4-oxo-6-deoxy-D-glucose transaminase               | <b>-0.05</b> | 0.91387 |
| STM3926 | wzxE    | O-antigen translocase                                  | <b>-0.04</b> | 0.93841 |
| STM3926 | wzxE    | O-antigen translocase                                  | <b>0.07</b>  | 0.87871 |
| STM3927 | STM3927 | 4-alpha-L-fucosyltransferase                           | <b>-0.29</b> | 0.51549 |
| STM3927 | STM3927 | 4-alpha-L-fucosyltransferase                           | <b>0.33</b>  | 0.40500 |

|         |         |                                                    |              |         |
|---------|---------|----------------------------------------------------|--------------|---------|
| STM3928 | wecF    | putative enterobacterial common antigen polymerase | <b>-0.39</b> | 0.38041 |
| STM3928 | wecF    | putative enterobacterial common antigen polymerase | <b>0.13</b>  | 0.83552 |
|         |         | putative UDP-N-acetyl-D-mannosaminuronic acid      |              |         |
| STM3929 | wecG    | transferase                                        | <b>-0.07</b> | 0.87727 |
|         |         | putative UDP-N-acetyl-D-mannosaminuronic acid      |              |         |
| STM3929 | wecG    | transferase                                        | <b>0.00</b>  | 0.99938 |
| STM3930 | yifK    | putative amino acid transport protein              | <b>-0.27</b> | 0.49336 |
| STM3930 | yifK    | putative amino acid transport protein              | <b>-0.22</b> | 0.67284 |
| STM3931 | argX    | STM3931                                            | <b>-0.84</b> | 0.23032 |
| STM3931 | argX    | STM3931                                            | <b>-0.67</b> | 0.21015 |
| STM3932 | hisR    | STM3932                                            | <b>-0.54</b> | 0.45462 |
| STM3932 | hisR    | STM3932                                            | <b>-0.32</b> | 0.57804 |
| STM3933 | leuT    | STM3933                                            | <b>-0.27</b> | 0.65598 |
| STM3933 | leuT    | STM3933                                            | <b>-0.23</b> | 0.70973 |
| STM3933 | leuT    | STM3933                                            | <b>-0.51</b> | 0.38747 |
| STM3933 | leuT    | STM3933                                            | <b>-0.58</b> | 0.39136 |
| STM3933 | leuT    | STM3933                                            | <b>-0.06</b> | 0.92937 |
| STM3933 | leuT    | STM3933                                            | <b>-0.17</b> | 0.81331 |
| STM3933 | leuT    | STM3933                                            | <b>-0.09</b> | 0.86385 |
| STM3933 | leuT    | STM3933                                            | <b>-0.24</b> | 0.67816 |
| STM3934 | proM    | STM3934                                            | <b>-0.33</b> | 0.50335 |
| STM3934 | proM    | STM3934                                            | <b>-0.28</b> | 0.58848 |
| STM3935 | hemY    | heme biosynthetic protein                          | <b>-0.28</b> | 0.44208 |
| STM3935 | hemY    | heme biosynthetic protein                          | <b>0.08</b>  | 0.84021 |
| STM3936 | hemX    | uroporphyrinogen III methylase                     | <b>0.09</b>  | 0.85758 |
| STM3936 | hemX    | uroporphyrinogen III methylase                     | <b>0.13</b>  | 0.79769 |
| STM3937 | STM3937 | uroporphyrinogen-III synthetase                    | <b>-0.05</b> | 0.91170 |
| STM3937 | STM3937 | uroporphyrinogen-III synthetase                    | <b>-0.34</b> | 0.54376 |
| STM3938 | hemC    | porphobilinogen deaminase                          | <b>-0.05</b> | 0.91387 |
| STM3938 | hemC    | porphobilinogen deaminase                          | <b>0.01</b>  | 0.98734 |
| STM3939 | cyaA    | adenylate cyclase                                  | <b>-0.47</b> | 0.25433 |
| STM3939 | cyaA    | adenylate cyclase                                  | <b>0.34</b>  | 0.39315 |
| STM3940 | STM3940 | putative inner membrane protein                    | <b>-0.08</b> | 0.86968 |
| STM3940 | STM3940 | putative inner membrane protein                    | <b>0.11</b>  | 0.82384 |
| STM3941 | STM3941 | putative inner membrane protein                    | <b>-0.25</b> | 0.57696 |
| STM3941 | STM3941 | putative inner membrane protein                    | <b>-0.04</b> | 0.94386 |
| STM3943 | cyaY    | frataxin-like protein                              | <b>-0.67</b> | 0.16631 |
| STM3943 | cyaY    | frataxin-like protein                              | <b>0.14</b>  | 0.76245 |
| STM3944 | STM3944 | putative inner membrane protein                    | <b>0.04</b>  | 0.93582 |
| STM3944 | STM3944 | putative inner membrane protein                    | <b>-0.14</b> | 0.72916 |
| STM3946 | yifL    | putative outer membrane lipoprotein                | <b>-0.25</b> | 0.58506 |
| STM3946 | yifL    | putative outer membrane lipoprotein                | <b>0.68</b>  | 0.16490 |
| STM3947 | dapF    | diaminopimelate epimerase                          | <b>0.09</b>  | 0.86064 |
| STM3947 | dapF    | diaminopimelate epimerase                          | <b>0.07</b>  | 0.85825 |
| STM3948 | yigA    | putative cytoplasmic protein                       | <b>-0.41</b> | 0.40227 |
| STM3948 | yigA    | putative cytoplasmic protein                       | <b>-0.11</b> | 0.86321 |
| STM3949 | xerC    | tyrosine recombinase                               | <b>0.00</b>  | 0.99939 |
| STM3949 | xerC    | tyrosine recombinase                               | <b>0.43</b>  | 0.41990 |
| STM3950 | yigB    | putative hydrolase                                 | <b>-0.28</b> | 0.62751 |
| STM3950 | yigB    | putative hydrolase                                 | <b>-0.11</b> | 0.82871 |
| STM3951 | uvrD    | DNA-dependent ATPase I/helicase II                 | <b>-0.34</b> | 0.52934 |
| STM3951 | uvrD    | DNA-dependent ATPase I/helicase II                 | <b>-0.23</b> | 0.66902 |
| STM3952 | corA    | Mg2+/Ni2+/Co2+ transport protein                   | <b>-0.22</b> | 0.60597 |
| STM3952 | corA    | Mg2+/Ni2+/Co2+ transport protein                   | <b>-0.19</b> | 0.69519 |
| STM3953 | yigF    | putative inner membrane protein                    | <b>0.07</b>  | 0.87512 |
| STM3953 | yigF    | putative inner membrane protein                    | <b>0.02</b>  | 0.98090 |
| STM3955 | rarD    | chloramphenicol resistance                         | <b>-0.15</b> | 0.72149 |
| STM3955 | rarD    | chloramphenicol resistance                         | <b>-0.19</b> | 0.61201 |
| STM3956 | yigl    | hypothetical protein STM3956                       | <b>-0.73</b> | 0.15955 |
| STM3956 | yigl    | hypothetical protein STM3956                       | <b>-0.25</b> | 0.61299 |
| STM3957 | pIdA    | outer membrane phospholipase A precursor           | <b>-0.29</b> | 0.49708 |
| STM3957 | pIdA    | outer membrane phospholipase A precursor           | <b>0.48</b>  | 0.30748 |
| STM3958 | recQ    | ATP-dependent DNA helicase                         | <b>-0.16</b> | 0.65301 |

|           |         |                                                       |              |         |
|-----------|---------|-------------------------------------------------------|--------------|---------|
| STM3958   | recQ    | ATP-dependent DNA helicase                            | <b>0.33</b>  | 0.46629 |
| STM3959   | rhtC    | threonine efflux protein                              | <b>-0.17</b> | 0.71978 |
| STM3959   | rhtC    | threonine efflux protein                              | <b>0.05</b>  | 0.93150 |
| STM3960   | rthB    | homoserine/homoserine lactone efflux protein          | <b>-0.18</b> | 0.68418 |
| STM3960   | rthB    | homoserine/homoserine lactone efflux protein          | <b>0.33</b>  | 0.45423 |
| STM3961   | pldB    | lysophospholipase L2                                  | <b>-0.02</b> | 0.97916 |
| STM3961   | pldB    | lysophospholipase L2                                  | <b>0.05</b>  | 0.91456 |
| STM3962   | yigL    | putative hydrolase                                    | <b>0.30</b>  | 0.42811 |
| STM3962   | yigL    | putative hydrolase                                    | <b>0.44</b>  | 0.26261 |
| STM3963   | yigM    | putative transport protein                            | <b>0.07</b>  | 0.92727 |
| STM3963   | yigM    | putative transport protein                            | <b>0.42</b>  | 0.48129 |
| STM3964   | metR    | metE/metH regulator                                   | <b>-0.57</b> | 0.32481 |
| STM3964   | metR    | metE/metH regulator                                   | <b>0.03</b>  | 0.95985 |
| STM3965   | metE    | 5-methyltetrahydropteroyltriglutamate--homocysteine   | <b>-0.37</b> | 0.45852 |
| STM3965   | metE    | 5-methyltetrahydropteroyltriglutamate--homocysteine   | <b>0.46</b>  | 0.34125 |
| STM3966   | STM3966 | putative arylsulfatase regulator                      | <b>-0.59</b> | 0.18265 |
| STM3966   | STM3966 | putative arylsulfatase regulator                      | <b>0.09</b>  | 0.91783 |
| STM3967   | dlhH    | putative dienelactone hydrolase                       | <b>0.26</b>  | 0.47065 |
| STM3967   | dlhH    | putative dienelactone hydrolase                       | <b>0.17</b>  | 0.72219 |
| STM3968   | udp     | uridine phosphorylase                                 | <b>-0.19</b> | 0.74224 |
| STM3968   | udp     | uridine phosphorylase                                 | <b>0.18</b>  | 0.76538 |
| STM3969   | yigN    | putative inner membrane protein                       | <b>-0.32</b> | 0.47937 |
| STM3969   | yigN    | putative inner membrane protein                       | <b>0.27</b>  | 0.55825 |
| STM3970   | ubiE    | ubiquinone/menaquinone biosynthesis methyltransferase | <b>0.09</b>  | 0.84686 |
| STM3970   | ubiE    | ubiquinone/menaquinone biosynthesis methyltransferase | <b>0.04</b>  | 0.92520 |
| STM3971   | yigP    | putative inner membrane protein                       | <b>-0.34</b> | 0.36243 |
| STM3971   | yigP    | putative inner membrane protein                       | <b>0.10</b>  | 0.84625 |
| STM3972   | aarF    | putative ubiquinone biosynthesis protein UbiB         | <b>-0.38</b> | 0.39025 |
| STM3972   | aarF    | putative ubiquinone biosynthesis protein UbiB         | <b>-0.27</b> | 0.46629 |
| STM3973   | tatA    | twin argininte translocase protein A                  | <b>-0.15</b> | 0.74087 |
| STM3973   | tatA    | twin argininte translocase protein A                  | <b>-0.06</b> | 0.88647 |
| STM3974   | tatB    | sec-independent translocase                           | <b>0.05</b>  | 0.93387 |
| STM3974   | tatB    | sec-independent translocase                           | <b>0.19</b>  | 0.66460 |
| STM3975   | tatC    | Sec-independent protein secretion pathway component   | <b>-0.69</b> | 0.19142 |
| STM3975   | tatC    | Sec-independent protein secretion pathway component   | <b>-0.21</b> | 0.62861 |
| STM3976,S | yigW    | putative hydrolase                                    | <b>-0.64</b> | 0.22602 |
| STM3976,S | yigW    | putative hydrolase                                    | <b>-0.06</b> | 0.93367 |
| STM3977   | rfaH    | transcriptional activator RfaH                        | <b>-0.03</b> | 0.94990 |
| STM3977   | rfaH    | transcriptional activator RfaH                        | <b>0.01</b>  | 0.99512 |
| STM3978   | yigC    | putative oxidoreductase                               | <b>0.08</b>  | 0.84296 |
| STM3978   | yigC    | putative oxidoreductase                               | <b>0.41</b>  | 0.43591 |
| STM3979   | ubiB    | NAD(P)H-flavin reductase                              | <b>-0.04</b> | 0.93506 |
| STM3979   | ubiB    | NAD(P)H-flavin reductase                              | <b>-0.09</b> | 0.86017 |
| STM3981   | STM3981 | putative cytoplasmic protein                          | <b>-0.36</b> | 0.56535 |
| STM3981   | STM3981 | putative cytoplasmic protein                          | <b>-0.05</b> | 0.92908 |
| STM3982   | fadA    | acetyl-CoA acetyltransferase                          | <b>-0.92</b> | 0.15346 |
| STM3982   | fadA    | acetyl-CoA acetyltransferase                          | <b>-0.24</b> | 0.74779 |
| STM3983   | fadB    | 3-hydroxyacyl-CoA dehydrogenase                       | <b>-0.62</b> | 0.35881 |
| STM3983   | fadB    | 3-hydroxyacyl-CoA dehydrogenase                       | <b>-0.18</b> | 0.75851 |
| STM3984   | pepQ    | proline dipeptidase                                   | <b>-0.17</b> | 0.65130 |
| STM3984   | pepQ    | proline dipeptidase                                   | <b>0.69</b>  | 0.16778 |
| STM3985   | yigZ    | putative cytoplasmic protein                          | <b>-0.06</b> | 0.87690 |
| STM3985   | yigZ    | putative cytoplasmic protein                          | <b>0.01</b>  | 0.99182 |
| STM3986   | trkH    | potassium transport protein                           | <b>0.15</b>  | 0.78996 |
| STM3986   | trkH    | potassium transport protein                           | <b>-0.12</b> | 0.77818 |
| STM3987   | hemG    | protoporphyrin oxidase                                | <b>-0.46</b> | 0.26663 |
| STM3987   | hemG    | protoporphyrin oxidase                                | <b>0.10</b>  | 0.87512 |
| STM3991   | rrlA    | STM3991                                               | <b>0.02</b>  | 0.97837 |
| STM3991   | rrlA    | STM3991                                               | <b>0.24</b>  | 0.58903 |
| STM3991   | rrlA    | STM3991                                               | <b>-0.13</b> | 0.87917 |
| STM3991   | rrlA    | STM3991                                               | <b>-0.43</b> | 0.60052 |

|           |           |                                                         |              |         |
|-----------|-----------|---------------------------------------------------------|--------------|---------|
| STM3992   | rrfA      | STM3992                                                 | <b>-0.04</b> | 0.96568 |
| STM3992   | rrfA      | STM3992                                                 | <b>0.12</b>  | 0.83443 |
| STM3992   | rrfA      | STM3992                                                 | <b>-0.01</b> | 0.99432 |
| STM3992   | rrfA      | STM3992                                                 | <b>-0.04</b> | 0.95890 |
| STM3992   | rrfA      | STM3992                                                 | <b>-0.08</b> | 0.89142 |
| STM3992   | rrfA      | STM3992                                                 | <b>0.04</b>  | 0.93767 |
| STM3992   | rrfA      | STM3992                                                 | <b>0.23</b>  | 0.63683 |
| STM3992   | rrfA      | STM3992                                                 | <b>-0.05</b> | 0.93174 |
| STM3992   | rrfA      | STM3992                                                 | <b>0.45</b>  | 0.43219 |
| STM3992   | rrfA      | STM3992                                                 | <b>0.21</b>  | 0.70458 |
|           |           | molybdopterin-guanine dinucleotide biosynthesis protein |              |         |
| STM3993   | mobB      | B                                                       | <b>-0.20</b> | 0.60620 |
|           |           | molybdopterin-guanine dinucleotide biosynthesis protein |              |         |
| STM3993   | mobB      | B                                                       | <b>-0.23</b> | 0.57804 |
|           |           | molybdopterin-guanine dinucleotide biosynthesis protein |              |         |
| STM3994   | mobA      | A                                                       | <b>-0.14</b> | 0.74878 |
|           |           | molybdopterin-guanine dinucleotide biosynthesis protein |              |         |
| STM3994   | mobA      | A                                                       | <b>-0.37</b> | 0.55978 |
| STM3995   | yihD      | putative cytoplasmic protein                            | <b>-0.19</b> | 0.67908 |
| STM3995   | yihD      | putative cytoplasmic protein                            | <b>-0.03</b> | 0.93811 |
| STM3996   | yihE      | putative type II homoserine kinase                      | <b>-0.33</b> | 0.41391 |
| STM3996   | yihE      | putative type II homoserine kinase                      | <b>0.00</b>  | 0.99540 |
| STM3997   | dsbA      | periplasmic protein disulfide isomerase I               | <b>-0.07</b> | 0.87655 |
| STM3997   | dsbA      | periplasmic protein disulfide isomerase I               | <b>0.10</b>  | 0.81325 |
| STM3998   | yihG      | putative endonuclease                                   | <b>-0.42</b> | 0.29848 |
| STM3998   | yihG      | putative endonuclease                                   | <b>-0.28</b> | 0.53594 |
| STM3999   | polA      | DNA polymerase I                                        | <b>-0.35</b> | 0.40227 |
| STM3999   | polA      | DNA polymerase I                                        | <b>0.15</b>  | 0.68136 |
| STM4000   | spf       | STM4000                                                 | <b>0.22</b>  | 0.61833 |
| STM4000   | spf       | STM4000                                                 | <b>0.17</b>  | 0.72976 |
| STM4001   | yihA      | GTP-binding protein                                     | <b>-0.47</b> | 0.23724 |
| STM4001   | yihA      | GTP-binding protein                                     | <b>-0.29</b> | 0.63076 |
| STM4003   | yihI      | hypothetical protein STM4003                            | <b>-0.46</b> | 0.37619 |
| STM4003   | yihI      | hypothetical protein STM4003                            | <b>-0.12</b> | 0.80915 |
| STM4004   | hemN      | coproporphyrinogen III oxidase                          | <b>-0.10</b> | 0.80077 |
| STM4004   | hemN      | coproporphyrinogen III oxidase                          | <b>0.02</b>  | 0.96018 |
| STM4005   | glnG      | response regulator                                      | <b>0.41</b>  | 0.29393 |
| STM4005   | glnG      | response regulator                                      | <b>0.26</b>  | 0.76538 |
| STM4006   | glnL      | sensor kinase                                           | <b>0.37</b>  | 0.30422 |
| STM4006   | glnL      | sensor kinase                                           | <b>0.60</b>  | 0.17359 |
| STM4007   | glnA      | glutamine synthetase                                    | <b>0.25</b>  | 0.50801 |
| STM4007   | glnA      | glutamine synthetase                                    | <b>-0.04</b> | 0.93083 |
| STM4009   | typA      | GTP-binding elongation factor family protein            | <b>-0.37</b> | 0.37342 |
| STM4009   | typA      | GTP-binding elongation factor family protein            | <b>0.18</b>  | 0.75212 |
| STM4010   | STM4010   | putative hydrolase                                      | <b>-0.11</b> | 0.80719 |
| STM4010   | STM4010   | putative hydrolase                                      | <b>-0.11</b> | 0.84453 |
| STM4011   | STM4011   | putative inner membrane protein                         | <b>-0.28</b> | 0.67970 |
| STM4011   | STM4011   | putative inner membrane protein                         | <b>-0.16</b> | 0.75413 |
| STM4012   | STM4012   | coproporphyrinogen III oxidase                          | <b>-0.41</b> | 0.29796 |
| STM4012   | STM4012   | coproporphyrinogen III oxidase                          | <b>-0.20</b> | 0.62757 |
|           |           | putative membrane-associated metal-dependent            |              |         |
| STM4013,S | STM4013,S | hydrolase                                               | <b>-0.34</b> | 0.52208 |
|           |           | putative membrane-associated metal-dependent            |              |         |
| STM4013,S | STM4013,S | hydrolase                                               | <b>0.20</b>  | 0.66902 |
| STM4014   | STM4014   | putative periplasmic protein                            | <b>-0.35</b> | 0.51587 |
| STM4014   | STM4014   | putative periplasmic protein                            | <b>0.18</b>  | 0.83443 |
| STM4015   | STM4015   | putative cytoplasmic protein                            | <b>-0.53</b> | 0.38792 |
| STM4015   | STM4015   | putative cytoplasmic protein                            | <b>0.59</b>  | 0.21015 |
| STM4016   | yshA      | putative outer membrane protein                         | <b>-0.36</b> | 0.59675 |
| STM4016   | yshA      | putative outer membrane protein                         | <b>-0.04</b> | 0.95081 |
| STM4017   | yihO      | putative GPH family transport protein                   | <b>-0.62</b> | 0.22602 |
| STM4017   | yihO      | putative GPH family transport protein                   | <b>0.25</b>  | 0.65285 |
| STM4018   | yihP      | putative GPH family transport protein                   | <b>-0.60</b> | 0.39034 |

|            |            |                                                 |              |         |
|------------|------------|-------------------------------------------------|--------------|---------|
| STM4018    | yihP       | putative GPH family transport protein           | <b>0.27</b>  | 0.61205 |
| STM4019    | yihQ       | putative alpha-xylosidase                       | <b>0.17</b>  | 0.76610 |
| STM4019    | yihQ       | putative alpha-xylosidase                       | <b>0.25</b>  | 0.59821 |
| STM4020,S  | yihR       | putative aldose-1-epimerase                     | <b>0.26</b>  | 0.56565 |
| STM4020,S  | yihR       | putative aldose-1-epimerase                     | <b>0.13</b>  | 0.79473 |
| STM4021    | yihS       | putative isomerase                              | <b>-0.33</b> | 0.60595 |
| STM4021    | yihS       | putative isomerase                              | <b>0.15</b>  | 0.74949 |
| STM4022    | yihT       | putative aldolase                               | <b>-0.31</b> | 0.61285 |
| STM4022    | yihT       | putative aldolase                               | <b>0.30</b>  | 0.53497 |
| STM4023    | yihU       | putative oxidoreductase                         | <b>-0.06</b> | 0.94839 |
| STM4023    | yihU       | putative oxidoreductase                         | <b>0.43</b>  | 0.59887 |
| STM4024,S  | yihV       | putative sugar kinase                           | <b>0.40</b>  | 0.42613 |
| STM4024,S  | yihV       | putative sugar kinase                           | <b>0.49</b>  | 0.34070 |
| STM4025    | yihW       | putative glycerol-3-phosphate regulon repressor | <b>-0.20</b> | 0.67363 |
| STM4025    | yihW       | putative glycerol-3-phosphate regulon repressor | <b>0.01</b>  | 0.98546 |
| STM4026    | yihX       | phosphatase                                     | <b>-0.05</b> | 0.92007 |
| STM4026    | yihX       | phosphatase                                     | <b>-0.06</b> | 0.90661 |
| STM4027    | rbn        | ribonuclease BN                                 | <b>-0.50</b> | 0.25382 |
| STM4027    | rbn        | ribonuclease BN                                 | <b>-0.29</b> | 0.50034 |
| STM4028    | yihZ       | D-tyrosyl-tRNA deacylase                        | <b>-0.54</b> | 0.23055 |
| STM4028    | yihZ       | D-tyrosyl-tRNA deacylase                        | <b>0.42</b>  | 0.34449 |
| STM4029    | yiiD       | putative acetyltransferase                      | <b>0.11</b>  | 0.80661 |
| STM4029    | yiiD       | putative acetyltransferase                      | <b>0.45</b>  | 0.32444 |
| STM4030,S  | STM4030,S  | putative cytoplasmic protein                    | <b>-0.24</b> | 0.52846 |
| STM4030,S  | STM4030,S  | putative cytoplasmic protein                    | <b>0.48</b>  | 0.49296 |
| STM4031    | STM4031    | putative cytoplasmic protein                    | <b>-0.08</b> | 0.84687 |
| STM4031    | STM4031    | putative cytoplasmic protein                    | <b>0.00</b>  | 0.99921 |
| STM4032    | STM4032    | putative acetyl esterase                        | <b>-0.24</b> | 0.66460 |
| STM4032    | STM4032    | putative acetyl esterase                        | <b>0.24</b>  | 0.60051 |
| STM4032,2N | STM4032,2N | hypothetical protein STM4032,2N                 | <b>0.00</b>  | 0.99512 |
| STM4032,2N | STM4032,2N | hypothetical protein STM4032,2N                 | <b>0.29</b>  | 0.46184 |
| STM4033    | STM4033    | putative regulatory protein                     | <b>-0.18</b> | 0.76312 |
| STM4033    | STM4033    | putative regulatory protein                     | <b>-0.19</b> | 0.80976 |
| STM4034    | fdhE       | formate dehydrogenase accessory protein FdhE    | <b>-0.63</b> | 0.33452 |
| STM4034    | fdhE       | formate dehydrogenase accessory protein FdhE    | <b>-0.23</b> | 0.57797 |
| STM4035    | fdol       | formate dehydrogenase-O gamma subunit           | <b>0.27</b>  | 0.63328 |
| STM4035    | fdol       | formate dehydrogenase-O gamma subunit           | <b>-0.04</b> | 0.94579 |
| STM4036    | fdoH       | formate dehydrogenase-O beta subunit            | <b>-0.49</b> | 0.66460 |
| STM4036    | fdoH       | formate dehydrogenase-O beta subunit            | <b>0.44</b>  | 0.40774 |
| STM4037    | fdoG       | formate dehydrogenase alpha subunit             | <b>0.12</b>  | 0.83671 |
| STM4037    | fdoG       | formate dehydrogenase alpha subunit             | <b>0.82</b>  | 0.31280 |
| STM4038    | fdhD       | formate dehydrogenase accessory protein         | <b>0.77</b>  | 0.17057 |
| STM4038    | fdhD       | formate dehydrogenase accessory protein         | <b>0.87</b>  | 0.15859 |
| STM4039    | STM4039    | putative inner membrane lipoprotein             | <b>-0.42</b> | 0.33452 |
| STM4039    | STM4039    | putative inner membrane lipoprotein             | <b>-0.16</b> | 0.73811 |
| STM4040    | yiiG       | putative cytoplasmic protein                    | <b>-0.19</b> | 0.70966 |
| STM4040    | yiiG       | putative cytoplasmic protein                    | <b>0.50</b>  | 0.53705 |
| STM4041    | STM4041    | putative inner membrane protein                 | <b>-0.39</b> | 0.33536 |
| STM4041    | STM4041    | putative inner membrane protein                 | <b>-0.20</b> | 0.72365 |
| STM4042    | STM4042    | putative branched-chain amino acid permease     | <b>-0.11</b> | 0.79018 |
| STM4042    | STM4042    | putative branched-chain amino acid permease     | <b>0.01</b>  | 0.98894 |
| STM4042A   | STM4042A   | hypothetical protein STM4042A                   | <b>0.00</b>  | 0.99822 |
| STM4042A   | STM4042A   | hypothetical protein STM4042A                   | <b>-0.04</b> | 0.93881 |
| STM4043    | yiiL       | putative cytoplasmic protein                    | <b>0.33</b>  | 0.68961 |
| STM4043    | yiiL       | putative cytoplasmic protein                    | <b>0.16</b>  | 0.74361 |
| STM4044    | STM4044    | putative alcohol dehydrogenase                  | <b>0.52</b>  | 0.61201 |
| STM4044    | STM4044    | putative alcohol dehydrogenase                  | <b>0.09</b>  | 0.85758 |
| STM4045    | rhaD       | rhamnulose-1-phosphate aldolase                 | <b>-0.34</b> | 0.58912 |
| STM4045    | rhaD       | rhamnulose-1-phosphate aldolase                 | <b>0.12</b>  | 0.82664 |
| STM4046    | rhaA       | L-rhamnose isomerase                            | <b>-0.04</b> | 0.91974 |
| STM4046    | rhaA       | L-rhamnose isomerase                            | <b>0.82</b>  | 0.12727 |
| STM4047    | rhaB       | rhamnulokinase                                  | <b>-0.89</b> | 0.11913 |
| STM4047    | rhaB       | rhamnulokinase                                  | <b>0.55</b>  | 0.32016 |

|           |         |                                                            |              |         |
|-----------|---------|------------------------------------------------------------|--------------|---------|
| STM4048   | rhaS    | L-rhamnose operon regulatory protein                       | <b>-0.19</b> | 0.62216 |
| STM4048   | rhaS    | L-rhamnose operon regulatory protein                       | <b>0.81</b>  | 0.32673 |
| STM4049   | rhaR    | rhaRS operon regulatory protein                            | <b>-0.04</b> | 0.95211 |
| STM4049   | rhaR    | rhaRS operon regulatory protein                            | <b>0.35</b>  | 0.49708 |
| STM4050   | rhaT    | L-rhamnose/H+ symporter protein                            | <b>-0.28</b> | 0.71113 |
| STM4050   | rhaT    | L-rhamnose/H+ symporter protein                            | <b>0.19</b>  | 0.80637 |
| STM4051   | STM4051 | putative outer membrane protein                            | <b>-0.41</b> | 0.46674 |
| STM4051   | STM4051 | putative outer membrane protein                            | <b>-0.37</b> | 0.49530 |
| STM4052   | STM4052 | putative C4-dicarboxylate transport system                 | <b>-0.15</b> | 0.78521 |
| STM4052   | STM4052 | putative C4-dicarboxylate transport system                 | <b>0.10</b>  | 0.92403 |
| STM4053   | STM4053 | putative C4-dicarboxylate transport system                 | <b>0.03</b>  | 0.95608 |
| STM4053   | STM4053 | putative C4-dicarboxylate transport system                 | <b>0.58</b>  | 0.17402 |
| STM4054   | STM4054 | putative periplasmic dicarboxylate-binding protein         | <b>0.10</b>  | 0.80976 |
| STM4054   | STM4054 | putative periplasmic dicarboxylate-binding protein         | <b>0.38</b>  | 0.47766 |
| STM4055   | sodA    | superoxide dismutase                                       | <b>-0.25</b> | 0.53062 |
| STM4055   | sodA    | superoxide dismutase                                       | <b>0.18</b>  | 0.70229 |
| STM4056,S | yjiM    | putative cytoplasmic protein                               | <b>-0.21</b> | 0.62861 |
| STM4056,S | yjiM    | putative cytoplasmic protein                               | <b>0.14</b>  | 0.78755 |
| STM4057   | STM4057 | putative inner membrane protein                            | <b>-0.52</b> | 0.22283 |
| STM4057   | STM4057 | putative inner membrane protein                            | <b>-0.01</b> | 0.99213 |
| STM4058   | cpxA    | two-component sensor protein                               | <b>-0.53</b> | 0.31424 |
| STM4058   | cpxA    | two-component sensor protein                               | <b>-0.04</b> | 0.95809 |
| STM4059   | cpxR    | response regulator                                         | <b>-0.51</b> | 0.31267 |
| STM4059   | cpxR    | response regulator                                         | <b>-0.07</b> | 0.89340 |
| STM4060   | cpxP    | periplasmic repressor                                      | <b>-0.21</b> | 0.60444 |
| STM4060   | cpxP    | periplasmic repressor                                      | <b>0.26</b>  | 0.50759 |
| STM4061   | fieF    | ferrous iron efflux protein F                              | <b>-0.09</b> | 0.81970 |
| STM4061   | fieF    | ferrous iron efflux protein F                              | <b>-0.07</b> | 0.86153 |
| STM4062   | pfkA    | 6-phosphofructokinase                                      | <b>-0.87</b> | 0.11224 |
| STM4062   | pfkA    | 6-phosphofructokinase                                      | <b>0.27</b>  | 0.72192 |
| STM4063   | sbp     | sulfate transport protein                                  | <b>-0.41</b> | 0.47407 |
| STM4063   | sbp     | sulfate transport protein                                  | <b>0.20</b>  | 0.79096 |
| STM4064   | ushB    | CDP-diacylglycerol pyrophosphatase                         | <b>-1.39</b> | 0.04783 |
| STM4064   | ushB    | CDP-diacylglycerol pyrophosphatase                         | <b>-1.12</b> | 0.11607 |
| STM4065   | STM4065 | putative Na+/galactoside symporter                         | <b>-0.67</b> | 0.27477 |
| STM4065   | STM4065 | putative Na+/galactoside symporter                         | <b>-0.16</b> | 0.77567 |
| STM4066   | STM4066 | aminoimidazole riboside kinase                             | <b>-0.53</b> | 0.37241 |
| STM4066   | STM4066 | aminoimidazole riboside kinase                             | <b>-0.10</b> | 0.80195 |
| STM4067   | STM4067 | putative ADP-ribosylglycohydrolase                         | <b>-0.17</b> | 0.68545 |
| STM4067   | STM4067 | putative ADP-ribosylglycohydrolase                         | <b>-0.13</b> | 0.76387 |
| STM4068   | STM4068 | putative regulatory protein                                | <b>-0.12</b> | 0.73825 |
| STM4068   | STM4068 | putative regulatory protein                                | <b>0.62</b>  | 0.32390 |
| STM4069   | STM4069 | putative periplasmic protein                               | <b>-0.28</b> | 0.49871 |
| STM4069   | STM4069 | putative periplasmic protein                               | <b>0.25</b>  | 0.73424 |
| STM4070   | STM4070 | putative cytoplasmic protein                               | <b>-0.58</b> | 0.22483 |
| STM4070   | STM4070 | putative cytoplasmic protein                               | <b>-0.33</b> | 0.47263 |
| STM4071   | STM4071 | putative mannose-6-phosphate isomerase                     | <b>0.13</b>  | 0.80490 |
| STM4071   | STM4071 | putative mannose-6-phosphate isomerase                     | <b>0.14</b>  | 0.89863 |
| STM4072   | ydeV    | putative sugar kinase                                      | <b>-0.48</b> | 0.32673 |
| STM4072   | ydeV    | putative sugar kinase                                      | <b>0.80</b>  | 0.21094 |
| STM4073   | ydeW    | putative transcriptional repressor                         | <b>0.32</b>  | 0.55338 |
| STM4073   | ydeW    | putative transcriptional repressor                         | <b>-0.25</b> | 0.70353 |
| STM4074   | ego     | putative ABC-type aldose transport system ATPase component | <b>-0.28</b> | 0.68313 |
| STM4074   | ego     | putative ABC-type aldose transport system ATPase component | <b>0.47</b>  | 0.41611 |
| STM4075   | ydeY    | putative sugar transport protein                           | <b>-0.63</b> | 0.39260 |
| STM4075   | ydeY    | putative sugar transport protein                           | <b>0.89</b>  | 0.14030 |
| STM4076   | ydeZ    | putative sugar transport protein                           | <b>-0.31</b> | 0.65693 |
| STM4076   | ydeZ    | putative sugar transport protein                           | <b>0.33</b>  | 0.48400 |
| STM4077   | yneA    | putative sugar transport protein                           | <b>-0.05</b> | 0.94060 |
| STM4077   | yneA    | putative sugar transport protein                           | <b>0.30</b>  | 0.43672 |
| STM4078   | yneB    | hypothetical protein STM4078                               | <b>-0.30</b> | 0.48879 |

|           |         |                                                              |              |         |
|-----------|---------|--------------------------------------------------------------|--------------|---------|
| STM4078   | yneB    | hypothetical protein STM4078                                 | <b>0.01</b>  | 0.98539 |
| STM4079,S | yneC    | putative inner membrane protein                              | <b>-0.39</b> | 0.34553 |
| STM4079,S | yneC    | putative inner membrane protein                              | <b>0.11</b>  | 0.82079 |
| STM4080   | STM4080 | ribulose-phosphate 3-epimerase                               | <b>-0.06</b> | 0.90356 |
| STM4080   | STM4080 | ribulose-phosphate 3-epimerase                               | <b>-0.17</b> | 0.78159 |
| STM4081   | tpiA    | triosephosphate isomerase                                    | <b>-0.17</b> | 0.77186 |
| STM4081   | tpiA    | triosephosphate isomerase                                    | <b>-0.63</b> | 0.32957 |
| STM4082   | yiiQ    | putative periplasmic protein                                 | <b>0.16</b>  | 0.67351 |
| STM4082   | yiiQ    | putative periplasmic protein                                 | <b>0.42</b>  | 0.30422 |
| STM4083   | yiiR    | putative inner membrane protein                              | <b>-0.46</b> | 0.24515 |
| STM4083   | yiiR    | putative inner membrane protein                              | <b>0.21</b>  | 0.68830 |
| STM4084   | fpr     | ferredoxin-NADP reductase                                    | <b>0.33</b>  | 0.45286 |
| STM4084   | fpr     | ferredoxin-NADP reductase                                    | <b>0.41</b>  | 0.45423 |
| STM4085   | glpX    | fructose 1,6-bisphosphatase II                               | <b>-0.29</b> | 0.47610 |
| STM4085   | glpX    | fructose 1,6-bisphosphatase II                               | <b>-0.29</b> | 0.56511 |
| STM4086   | glpK    | glycerol kinase                                              | <b>0.25</b>  | 0.70430 |
| STM4086   | glpK    | glycerol kinase                                              | <b>0.58</b>  | 0.36311 |
| STM4087   | glpF    | glycerol diffusion                                           | <b>1.04</b>  | 0.17041 |
| STM4087   | glpF    | glycerol diffusion                                           | <b>1.12</b>  | 0.14183 |
| STM4088   | yiiU    | putative cytoplasmic protein                                 | <b>-0.30</b> | 0.50272 |
| STM4088   | yiiU    | putative cytoplasmic protein                                 | <b>-0.06</b> | 0.91047 |
| STM4089   | menG    | ribonuclease activity regulator protein RraA                 | <b>-0.29</b> | 0.41676 |
| STM4089   | menG    | ribonuclease activity regulator protein RraA                 | <b>0.26</b>  | 0.55397 |
| STM4090   | menA    | 1,4-dihydroxy-2-naphthoate octaprenyltransferase,            | <b>-0.33</b> | 0.44208 |
| STM4090   | menA    | 1,4-dihydroxy-2-naphthoate octaprenyltransferase,            | <b>-0.30</b> | 0.45047 |
| STM4091   | hslU    | ATP-dependent protease ATP-binding subunit                   | <b>-0.45</b> | 0.22602 |
| STM4091   | hslU    | ATP-dependent protease ATP-binding subunit                   | <b>-0.14</b> | 0.69743 |
| STM4092   | hslV    | ATP-dependent protease peptidase subunit                     | <b>-0.33</b> | 0.38071 |
| STM4092   | hslV    | ATP-dependent protease peptidase subunit                     | <b>-0.41</b> | 0.28030 |
| STM4093   | ftsN    | essential cell division protein                              | <b>-0.31</b> | 0.61960 |
| STM4093   | ftsN    | essential cell division protein                              | <b>-0.12</b> | 0.78630 |
| STM4094   | cytR    | transcriptional repressor                                    | <b>0.40</b>  | 0.31280 |
| STM4094   | cytR    | transcriptional repressor                                    | <b>0.54</b>  | 0.32172 |
| STM4095   | priA    | primosome assembly protein PriA                              | <b>-0.07</b> | 0.87690 |
| STM4095   | priA    | primosome assembly protein PriA                              | <b>-0.01</b> | 0.99381 |
| STM4097   | STM4097 | putative outer membrane lipoprotein                          | <b>-0.53</b> | 0.36942 |
| STM4097   | STM4097 | putative outer membrane lipoprotein                          | <b>0.20</b>  | 0.80574 |
| STM4098   | STM4098 | putative arylsulfate sulfotransferase                        | <b>-0.68</b> | 0.18464 |
| STM4098   | STM4098 | putative arylsulfate sulfotransferase                        | <b>-0.09</b> | 0.82521 |
| STM4099   | metJ    | transcriptional repressor protein MetJ                       | <b>-0.58</b> | 0.17603 |
| STM4099   | metJ    | transcriptional repressor protein MetJ                       | <b>-0.26</b> | 0.45660 |
| STM4100   | metB    | cystathionine gamma-synthase                                 | <b>-0.57</b> | 0.35824 |
| STM4100   | metB    | cystathionine gamma-synthase                                 | <b>0.19</b>  | 0.63493 |
| STM4101   | metL    | bifunctional aspartate kinase II/homoserine dehydrogenase II | <b>-0.28</b> | 0.53459 |
| STM4101   | metL    | bifunctional aspartate kinase II/homoserine dehydrogenase II | <b>0.41</b>  | 0.33167 |
| STM4102   | STM4102 | putative inner membrane protein                              | <b>-0.02</b> | 0.98372 |
| STM4102   | STM4102 | putative inner membrane protein                              | <b>0.49</b>  | 0.36444 |
| STM4103   | STM4103 | putative cytoplasmic protein                                 | <b>0.26</b>  | 0.85658 |
| STM4103   | STM4103 | putative cytoplasmic protein                                 | <b>-0.71</b> | 0.20783 |
| STM4104   | STM4104 | putative 5'-nucleotidase/2',3'-cyclic phosphodiesterase      | <b>-0.07</b> | 0.90671 |
| STM4104   | STM4104 | putative 5'-nucleotidase/2',3'-cyclic phosphodiesterase      | <b>0.93</b>  | 0.21747 |
| STM4105   | metF    | 5,10-methylenetetrahydrofolate reductase                     | <b>0.23</b>  | 0.62216 |
| STM4105   | metF    | 5,10-methylenetetrahydrofolate reductase                     | <b>0.56</b>  | 0.35955 |
| STM4106   | katG    | hydroperoxidase                                              | <b>0.04</b>  | 0.96695 |
| STM4106   | katG    | hydroperoxidase                                              | <b>-0.16</b> | 0.72646 |
| STM4107   | yijF    | putative periplasmic protein                                 | <b>-0.95</b> | 0.19398 |
| STM4107   | yijF    | putative periplasmic protein                                 | <b>0.35</b>  | 0.48062 |
| STM4108   | gldA    | glycerol dehydrogenase                                       | <b>0.33</b>  | 0.60558 |
| STM4108   | gldA    | glycerol dehydrogenase                                       | <b>0.54</b>  | 0.25084 |
| STM4109   | talC    | fructose-6-phosphate aldolase                                | <b>0.16</b>  | 0.76553 |
| STM4109   | talC    | fructose-6-phosphate aldolase                                | <b>-0.08</b> | 0.87126 |

|         |      |                                                     |              |         |
|---------|------|-----------------------------------------------------|--------------|---------|
| STM4110 | ptsA | PEP-protein phosphotransferase                      | <b>-0.04</b> | 0.94658 |
| STM4110 | ptsA | PEP-protein phosphotransferase                      | <b>0.31</b>  | 0.48791 |
| STM4112 | frwC | PTS system fructose-like IIC component              | <b>-0.47</b> | 0.24520 |
| STM4112 | frwC | PTS system fructose-like IIC component              | <b>0.10</b>  | 0.86412 |
| STM4113 | frwB | PTS system fructose-like IIB component 1            | <b>0.00</b>  | 0.99822 |
| STM4113 | frwB | PTS system fructose-like IIB component 1            | <b>0.32</b>  | 0.46787 |
| STM4114 | pflD | putative pyruvate formate lyase II                  | <b>0.08</b>  | 0.84783 |
| STM4114 | pflD | putative pyruvate formate lyase II                  | <b>0.13</b>  | 0.76921 |
| STM4115 | pflC | putative pyruvate formate lyase activating enzyme 2 | <b>0.03</b>  | 0.95910 |
| STM4115 | pflC | putative pyruvate formate lyase activating enzyme 2 | <b>0.55</b>  | 0.41134 |
| STM4116 | frwD | PTS system fructose-like IIB component 2            | <b>-0.42</b> | 0.29891 |
| STM4116 | frwD | PTS system fructose-like IIB component 2            | <b>0.09</b>  | 0.88013 |
| STM4117 | yijO | putative regulatory protein                         | <b>-0.36</b> | 0.47656 |
| STM4117 | yijO | putative regulatory protein                         | <b>0.26</b>  | 0.66545 |
| STM4118 | yijP | putative integral membrane protein                  | <b>-0.02</b> | 0.98239 |
| STM4118 | yijP | putative integral membrane protein                  | <b>0.29</b>  | 0.74238 |
| STM4119 | ppc  | phosphoenolpyruvate carboxylase                     | <b>-0.02</b> | 0.96785 |
| STM4119 | ppc  | phosphoenolpyruvate carboxylase                     | <b>0.06</b>  | 0.90277 |
| STM4120 | argE | acetylornithine deacetylase                         | <b>0.11</b>  | 0.81667 |
| STM4120 | argE | acetylornithine deacetylase                         | <b>0.02</b>  | 0.96785 |
| STM4121 | argC | N-acetyl-gamma-glutamyl-phosphate reductase         | <b>0.31</b>  | 0.44331 |
| STM4121 | argC | N-acetyl-gamma-glutamyl-phosphate reductase         | <b>0.46</b>  | 0.41314 |
| STM4122 | argB | acetylglutamate kinase                              | <b>0.12</b>  | 0.78877 |
| STM4122 | argB | acetylglutamate kinase                              | <b>0.01</b>  | 0.99079 |
| STM4123 | argH | argininosuccinate lyase                             | <b>0.10</b>  | 0.81806 |
| STM4123 | argH | argininosuccinate lyase                             | <b>0.18</b>  | 0.74142 |
| STM4125 | oxyR | oxidative stress regulatory protein                 | <b>-0.02</b> | 0.96850 |
| STM4125 | oxyR | oxidative stress regulatory protein                 | <b>0.08</b>  | 0.86987 |
| STM4126 | udhA | soluble pyridine nucleotide transhydrogenase        | <b>-0.07</b> | 0.88709 |
| STM4126 | udhA | soluble pyridine nucleotide transhydrogenase        | <b>0.08</b>  | 0.86951 |
| STM4127 | yijC | putative transcriptional repressor                  | <b>-0.43</b> | 0.32673 |
| STM4127 | yijC | putative transcriptional repressor                  | <b>0.28</b>  | 0.49871 |
| STM4128 | yijD | putative inner membrane protein                     | <b>-0.25</b> | 0.61614 |
| STM4128 | yijD | putative inner membrane protein                     | <b>0.12</b>  | 0.81142 |
| STM4129 | trmA | tRNA (uracil-5-)-methyltransferase                  | <b>-0.02</b> | 0.97348 |
| STM4129 | trmA | tRNA (uracil-5-)-methyltransferase                  | <b>0.49</b>  | 0.32172 |
| STM4130 | btuB | outer membrane receptor protein precursor           | <b>-0.07</b> | 0.87826 |
| STM4130 | btuB | outer membrane receptor protein precursor           | <b>0.12</b>  | 0.76240 |
| STM4131 | murl | glutamate racemase                                  | <b>-0.21</b> | 0.68032 |
| STM4131 | murl | glutamate racemase                                  | <b>-0.37</b> | 0.35816 |
| STM4132 | rrsB | STM4132                                             | <b>0.08</b>  | 0.87016 |
| STM4132 | rrsB | STM4132                                             | <b>0.09</b>  | 0.85909 |
| STM4132 | rrsB | STM4132                                             | <b>-0.45</b> | 0.28030 |
| STM4132 | rrsB | STM4132                                             | <b>-0.22</b> | 0.66112 |
| STM4132 | rrsB | STM4132                                             | <b>-0.34</b> | 0.41330 |
| STM4132 | rrsB | STM4132                                             | <b>-0.14</b> | 0.81727 |
| STM4132 | rrsB | STM4132                                             | <b>-0.13</b> | 0.86190 |
| STM4132 | rrsB | STM4132                                             | <b>-0.26</b> | 0.58903 |
| STM4132 | rrsB | STM4132                                             | <b>-0.38</b> | 0.46629 |
| STM4132 | rrsB | STM4132                                             | <b>-0.38</b> | 0.48590 |
| STM4132 | rrsB | STM4132                                             | <b>-0.45</b> | 0.39962 |
| STM4132 | rrsB | STM4132                                             | <b>0.30</b>  | 0.58912 |
| STM4133 | ileU | STM4133                                             | <b>-0.28</b> | 0.55780 |
| STM4133 | ileU | STM4133                                             | <b>-0.67</b> | 0.21747 |
| STM4133 | ileU | STM4133                                             | <b>-0.41</b> | 0.38260 |
| STM4133 | ileU | STM4133                                             | <b>-0.30</b> | 0.51608 |
| STM4133 | ileU | STM4133                                             | <b>-0.11</b> | 0.79308 |
| STM4133 | ileU | STM4133                                             | <b>0.14</b>  | 0.79242 |
| STM4134 | -    | STM4134                                             | <b>-0.22</b> | 0.73129 |
| STM4134 | -    | STM4134                                             | <b>-0.33</b> | 0.38317 |
| STM4134 | -    | STM4134                                             | <b>-0.42</b> | 0.27763 |
| STM4134 | -    | STM4134                                             | <b>-0.27</b> | 0.46199 |
| STM4134 | -    | STM4134                                             | <b>-0.34</b> | 0.37161 |

|         |         |                                            |              |         |
|---------|---------|--------------------------------------------|--------------|---------|
| STM4134 | -       | STM4134                                    | <b>0.14</b>  | 0.77346 |
| STM4135 | rrlB    | STM4135                                    | <b>-0.05</b> | 0.94102 |
| STM4135 | rrlB    | STM4135                                    | <b>0.14</b>  | 0.84354 |
| STM4138 | birA    | biotin--protein ligase                     | <b>-0.11</b> | 0.81943 |
| STM4138 | birA    | biotin--protein ligase                     | <b>0.04</b>  | 0.96117 |
| STM4139 | coaA    | pantothenate kinase                        | <b>-0.22</b> | 0.65817 |
| STM4139 | coaA    | pantothenate kinase                        | <b>0.14</b>  | 0.76929 |
| STM4142 | thrU    | STM4142                                    | <b>-0.28</b> | 0.67097 |
| STM4142 | thrU    | STM4142                                    | <b>0.56</b>  | 0.22602 |
| STM4143 | tyrU    | STM4143                                    | <b>-0.25</b> | 0.68147 |
| STM4143 | tyrU    | STM4143                                    | <b>0.44</b>  | 0.47159 |
| STM4144 | glyT    | STM4144                                    | <b>-0.12</b> | 0.80128 |
| STM4144 | glyT    | STM4144                                    | <b>0.08</b>  | 0.84456 |
| STM4145 | thrT    | STM4145                                    | <b>-0.30</b> | 0.59237 |
| STM4145 | thrT    | STM4145                                    | <b>-0.42</b> | 0.45069 |
| STM4146 | tuf     | elongation factor Tu                       | <b>-0.22</b> | 0.63535 |
| STM4146 | tuf     | elongation factor Tu                       | <b>0.33</b>  | 0.41913 |
| STM4147 | secE    | translocase                                | <b>-0.01</b> | 0.98117 |
| STM4147 | secE    | translocase                                | <b>0.32</b>  | 0.61275 |
| STM4148 | nusG    | transcription antitermination protein NusG | <b>-0.06</b> | 0.89004 |
| STM4148 | nusG    | transcription antitermination protein NusG | <b>-0.03</b> | 0.94990 |
| STM4149 | rplK    | 50S ribosomal protein L11                  | <b>-0.07</b> | 0.86190 |
| STM4149 | rplK    | 50S ribosomal protein L11                  | <b>0.19</b>  | 0.75437 |
| STM4150 | rplA    | 50S ribosomal protein L1                   | <b>0.03</b>  | 0.94765 |
| STM4150 | rplA    | 50S ribosomal protein L1                   | <b>0.03</b>  | 0.94990 |
| STM4151 | rplJ    | 50S ribosomal protein L10                  | <b>-0.09</b> | 0.84021 |
| STM4151 | rplJ    | 50S ribosomal protein L10                  | <b>0.21</b>  | 0.60174 |
| STM4152 | rplL    | 50S ribosomal protein L7/L12               | <b>-0.23</b> | 0.51275 |
| STM4152 | rplL    | 50S ribosomal protein L7/L12               | <b>0.25</b>  | 0.55355 |
| STM4153 | rpoB    | DNA-directed RNA polymerase beta subunit   | <b>0.00</b>  | 0.99742 |
| STM4153 | rpoB    | DNA-directed RNA polymerase beta subunit   | <b>0.44</b>  | 0.38668 |
| STM4154 | rpoC    | DNA-directed RNA polymerase beta' subunit  | <b>-0.19</b> | 0.64174 |
| STM4154 | rpoC    | DNA-directed RNA polymerase beta' subunit  | <b>-0.62</b> | 0.34793 |
| STM4155 | STM4155 | putative inner membrane protein            | <b>0.02</b>  | 0.96595 |
| STM4155 | STM4155 | putative inner membrane protein            | <b>0.00</b>  | 0.99513 |
| STM4156 | STM4156 | putative cytoplasmic protein               | <b>-0.30</b> | 0.46565 |
| STM4156 | STM4156 | putative cytoplasmic protein               | <b>0.26</b>  | 0.45739 |
| STM4157 | STM4157 | putative cytoplasmic protein               | <b>-0.21</b> | 0.63154 |
| STM4157 | STM4157 | putative cytoplasmic protein               | <b>0.13</b>  | 0.78750 |
| STM4158 | STM4158 | putative cytoplasmic protein               | <b>-0.25</b> | 0.52767 |
| STM4158 | STM4158 | putative cytoplasmic protein               | <b>0.04</b>  | 0.95910 |
| STM4159 | thiH    | thiamine biosynthesis protein ThiH         | <b>0.02</b>  | 0.98976 |
| STM4159 | thiH    | thiamine biosynthesis protein ThiH         | <b>0.01</b>  | 0.98658 |
| STM4160 | thiG    | thiazole synthase                          | <b>0.02</b>  | 0.98677 |
| STM4160 | thiG    | thiazole synthase                          | <b>0.47</b>  | 0.41422 |
| STM4161 | STM4161 | sulfur carrier protein ThiS                | <b>0.12</b>  | 0.77801 |
| STM4161 | STM4161 | sulfur carrier protein ThiS                | <b>0.69</b>  | 0.24515 |
| STM4162 | thiF    | thiamine biosynthesis protein ThiF         | <b>-0.56</b> | 0.19967 |
| STM4162 | thiF    | thiamine biosynthesis protein ThiF         | <b>0.01</b>  | 0.98640 |
| STM4163 | thiE    | thiamine-phosphate pyrophosphorylase       | <b>-0.28</b> | 0.67024 |
| STM4163 | thiE    | thiamine-phosphate pyrophosphorylase       | <b>0.36</b>  | 0.35937 |
| STM4164 | thiC    | thiamine biosynthesis protein ThiC         | <b>0.43</b>  | 0.40930 |
| STM4164 | thiC    | thiamine biosynthesis protein ThiC         | <b>0.76</b>  | 0.19780 |
| STM4165 | rsd     | anti sigma 70 factor                       | <b>-0.41</b> | 0.35955 |
| STM4165 | rsd     | anti sigma 70 factor                       | <b>0.43</b>  | 0.47656 |
| STM4166 | nudC    | NADH pyrophosphatase                       | <b>-0.06</b> | 0.90007 |
| STM4166 | nudC    | NADH pyrophosphatase                       | <b>0.34</b>  | 0.45664 |
| STM4167 | hemE    | uroporphyrinogen decarboxylase             | <b>-0.15</b> | 0.74100 |
| STM4167 | hemE    | uroporphyrinogen decarboxylase             | <b>0.05</b>  | 0.92716 |
| STM4168 | nfi     | endonuclease V                             | <b>0.25</b>  | 0.52101 |
| STM4168 | nfi     | endonuclease V                             | <b>0.54</b>  | 0.34201 |
| STM4169 | yjaG    | putative cytoplasmic protein               | <b>-0.09</b> | 0.82822 |
| STM4169 | yjaG    | putative cytoplasmic protein               | <b>0.22</b>  | 0.65539 |

|           |         |                                                      |              |         |
|-----------|---------|------------------------------------------------------|--------------|---------|
| STM4170   | hupA    | DNA-binding protein HU-alpha                         | <b>-0.47</b> | 0.41329 |
| STM4170   | hupA    | DNA-binding protein HU-alpha                         | <b>-0.32</b> | 0.51820 |
| STM4171   | yjaH    | putative inner membrane protein                      | <b>-0.06</b> | 0.91315 |
| STM4171   | yjaH    | putative inner membrane protein                      | <b>0.09</b>  | 0.86629 |
| STM4172   | zraP    | zinc-resistance associated protein                   | <b>-0.10</b> | 0.88504 |
| STM4172   | zraP    | zinc-resistance associated protein                   | <b>0.21</b>  | 0.75893 |
| STM4173   | hydH    | sensor kinase                                        | <b>0.03</b>  | 0.96209 |
| STM4173   | hydH    | sensor kinase                                        | <b>0.67</b>  | 0.23613 |
| STM4174   | hydG    | response regulator                                   | <b>0.09</b>  | 0.81667 |
| STM4174   | hydG    | response regulator                                   | <b>0.58</b>  | 0.22283 |
| STM4175   | purD    | phosphoribosylamine--glycine ligase                  | <b>0.02</b>  | 0.97720 |
| STM4175   | purD    | phosphoribosylamine--glycine ligase                  | <b>-0.42</b> | 0.49870 |
| STM4176   | purH    | bifunctional phosphoribosylaminoimidazolecarboxamide | <b>-0.09</b> | 0.86190 |
| STM4176   | purH    | bifunctional phosphoribosylaminoimidazolecarboxamide | <b>-0.30</b> | 0.42486 |
| STM4178   | gltV    | STM4178                                              | <b>-0.93</b> | 0.08580 |
| STM4178   | gltV    | STM4178                                              | <b>-0.34</b> | 0.40020 |
| STM4178   | gltV    | STM4178                                              | <b>-0.66</b> | 0.17754 |
| STM4178   | gltV    | STM4178                                              | <b>-0.72</b> | 0.19909 |
| STM4178   | gltV    | STM4178                                              | <b>-0.42</b> | 0.40191 |
| STM4178   | gltV    | STM4178                                              | <b>-0.23</b> | 0.63454 |
| STM4178   | gltV    | STM4178                                              | <b>-0.44</b> | 0.31280 |
| STM4178   | gltV    | STM4178                                              | <b>-0.14</b> | 0.76483 |
| STM4180   | rrfE    | STM4180                                              | <b>0.20</b>  | 0.81323 |
| STM4180   | rrfE    | STM4180                                              | <b>-0.23</b> | 0.84021 |
| STM4180   | rrfE    | STM4180                                              | <b>-0.39</b> | 0.59908 |
| STM4180   | rrfE    | STM4180                                              | <b>0.20</b>  | 0.74997 |
| STM4181   | yjaB    | putative acetyltransferase                           | <b>-0.23</b> | 0.65793 |
| STM4181   | yjaB    | putative acetyltransferase                           | <b>-0.13</b> | 0.82918 |
| STM4182   | metA    | homoserine O-succinyltransferase                     | <b>-0.11</b> | 0.79356 |
| STM4182   | metA    | homoserine O-succinyltransferase                     | <b>0.07</b>  | 0.89863 |
| STM4183   | aceB    | malate synthase                                      | <b>-0.14</b> | 0.80840 |
| STM4183   | aceB    | malate synthase                                      | <b>-0.20</b> | 0.70430 |
| STM4184   | aceA    | isocitrate lyase                                     | <b>-0.07</b> | 0.88653 |
| STM4184   | aceA    | isocitrate lyase                                     | <b>0.37</b>  | 0.55598 |
|           |         | bifunctional isocitrate dehydrogenase                |              |         |
| STM4185   | aceK    | kinase/phosphatase protein                           | <b>0.56</b>  | 0.40517 |
|           |         | bifunctional isocitrate dehydrogenase                |              |         |
| STM4185   | aceK    | kinase/phosphatase protein                           | <b>0.81</b>  | 0.24520 |
| STM4186   | STM4186 | putative cytoplasmic protein                         | <b>-0.15</b> | 0.79581 |
| STM4186   | STM4186 | putative cytoplasmic protein                         | <b>0.38</b>  | 0.35373 |
| STM4187   | iclR    | acetate operon transcriptional repressor             | <b>0.37</b>  | 0.35955 |
| STM4187   | iclR    | acetate operon transcriptional repressor             | <b>0.21</b>  | 0.68969 |
| STM4188,S | metH    | B12-dependent methionine synthase                    | <b>-0.65</b> | 0.34756 |
| STM4188,S | metH    | B12-dependent methionine synthase                    | <b>0.51</b>  | 0.34936 |
| STM4189   | yjbB    | putative transport protein                           | <b>-0.21</b> | 0.67351 |
| STM4189   | yjbB    | putative transport protein                           | <b>0.09</b>  | 0.83443 |
| STM4190   | pepE    | peptidase E                                          | <b>0.25</b>  | 0.79676 |
| STM4190   | pepE    | peptidase E                                          | <b>0.82</b>  | 0.11913 |
| STM4191   | STM4191 | putative cytoplasmic protein                         | <b>-0.43</b> | 0.37919 |
| STM4191   | STM4191 | putative cytoplasmic protein                         | <b>0.64</b>  | 0.39385 |
| STM4192   | STM4192 | putative cytoplasmic protein                         | <b>0.19</b>  | 0.66677 |
| STM4192   | STM4192 | putative cytoplasmic protein                         | <b>0.11</b>  | 0.80902 |
| STM4193   | yjbC    | putative pseudouridine synthase                      | <b>-0.14</b> | 0.85988 |
| STM4193   | yjbC    | putative pseudouridine synthase                      | <b>0.10</b>  | 0.87918 |
| STM4194   | yjbD    | putative cytoplasmic protein                         | <b>-0.26</b> | 0.57407 |
| STM4194   | yjbD    | putative cytoplasmic protein                         | <b>0.06</b>  | 0.91294 |
| STM4195   | STM4195 | putative Na+-dependent transporter                   | <b>-0.85</b> | 0.11421 |
| STM4195   | STM4195 | putative Na+-dependent transporter                   | <b>0.10</b>  | 0.80027 |
| STM4196   | STM4196 | putative cytoplasmic protein                         | <b>-0.58</b> | 0.26465 |
| STM4196   | STM4196 | putative cytoplasmic protein                         | <b>0.33</b>  | 0.50190 |
| STM4198   | STM4198 | putative cytoplasmic protein                         | <b>-0.65</b> | 0.24520 |
| STM4198   | STM4198 | putative cytoplasmic protein                         | <b>-0.26</b> | 0.62604 |
| STM4199   | STM4199 | putative cytoplasmic protein                         | <b>0.45</b>  | 0.61285 |

|           |           |                                                |              |         |
|-----------|-----------|------------------------------------------------|--------------|---------|
| STM4199   | STM4199   | putative cytoplasmic protein                   | <b>1.64</b>  | 0.16776 |
| STM4200   | STM4200   | putative phage tail fiber protein H            | <b>-0.15</b> | 0.77346 |
| STM4200   | STM4200   | putative phage tail fiber protein H            | <b>-0.46</b> | 0.59455 |
| STM4201   | STM4201   | putative phage tail protein                    | <b>-1.22</b> | 0.08783 |
| STM4201   | STM4201   | putative phage tail protein                    | <b>-0.37</b> | 0.63235 |
| STM4202   | STM4202   | putative phage baseplate protein               | <b>-0.32</b> | 0.56059 |
| STM4202   | STM4202   | putative phage baseplate protein               | <b>0.16</b>  | 0.80408 |
| STM4203   | STM4203   | putative phage baseplate protein               | <b>-0.03</b> | 0.98140 |
| STM4203   | STM4203   | putative phage baseplate protein               | <b>0.56</b>  | 0.38049 |
| STM4204   | STM4204   | putative inner membrane protein                | <b>-0.45</b> | 0.26261 |
| STM4204   | STM4204   | putative inner membrane protein                | <b>0.32</b>  | 0.68961 |
| STM4205   | STM4205   | putative phage glycosyltransferase             | <b>-0.13</b> | 0.80715 |
| STM4205   | STM4205   | putative phage glycosyltransferase             | <b>0.30</b>  | 0.41626 |
| STM4206   | STM4206   | putative phage glucose translocase             | <b>-0.02</b> | 0.98340 |
| STM4206   | STM4206   | putative phage glucose translocase             | <b>-0.13</b> | 0.84657 |
| STM4207   | STM4207   | putative phage baseplate component             | <b>0.17</b>  | 0.79180 |
| STM4207   | STM4207   | putative phage baseplate component             | <b>0.51</b>  | 0.26856 |
| STM4208   | STM4208   | putative cytoplasmic protein                   | <b>-0.09</b> | 0.86852 |
| STM4208   | STM4208   | putative cytoplasmic protein                   | <b>0.26</b>  | 0.56565 |
| STM4209   | STM4209   | putative inner membrane protein                | <b>0.00</b>  | 0.99698 |
| STM4209   | STM4209   | putative inner membrane protein                | <b>0.48</b>  | 0.34201 |
| STM4210   | STM4210   | putative methyl-accepting chemotaxis protein   | <b>-0.19</b> | 0.69372 |
| STM4210   | STM4210   | putative methyl-accepting chemotaxis protein   | <b>0.29</b>  | 0.74361 |
| STM4211   | STM4211   | putative phage tail protein                    | <b>-0.19</b> | 0.75319 |
| STM4211   | STM4211   | putative phage tail protein                    | <b>0.51</b>  | 0.40121 |
| STM4212   | STM4212   | putative phage tail core protein               | <b>-0.28</b> | 0.40820 |
| STM4212   | STM4212   | putative phage tail core protein               | <b>0.21</b>  | 0.66888 |
| STM4213   | STM4213   | putative phage tail sheath protein             | <b>-0.09</b> | 0.89759 |
| STM4213   | STM4213   | putative phage tail sheath protein             | <b>0.38</b>  | 0.42268 |
| STM4214   | STM4214   | putative cytoplasmic protein                   | <b>-0.56</b> | 0.38490 |
| STM4214   | STM4214   | putative cytoplasmic protein                   | <b>0.28</b>  | 0.69634 |
| STM4215   | STM4215   | putative cytoplasmic protein                   | <b>-1.17</b> | 0.21091 |
| STM4215   | STM4215   | putative cytoplasmic protein                   | <b>-0.32</b> | 0.59675 |
| STM4216   | STM4216   | putative inner membrane protein                | <b>-0.59</b> | 0.37154 |
| STM4216   | STM4216   | putative inner membrane protein                | <b>0.56</b>  | 0.52511 |
| STM4217   | STM4217   | putative soluble lytic murein transglycosylase | <b>-0.31</b> | 0.54624 |
| STM4217   | STM4217   | putative soluble lytic murein transglycosylase | <b>0.31</b>  | 0.57406 |
| STM4218   | STM4218   | putative inner membrane protein                | <b>-0.25</b> | 0.65916 |
| STM4218   | STM4218   | putative inner membrane protein                | <b>0.23</b>  | 0.61183 |
| STM4219,S | STM4219,S | putative cytoplasmic protein                   | <b>-0.24</b> | 0.77923 |
| STM4219,S | STM4219,S | putative cytoplasmic protein                   | <b>0.17</b>  | 0.68649 |
| STM4220   | lysC      | aspartate kinase III                           | <b>0.18</b>  | 0.82667 |
| STM4220   | lysC      | aspartate kinase III                           | <b>1.01</b>  | 0.38668 |
| STM4221   | pgi       | glucose-6-phosphate isomerase                  | <b>-0.57</b> | 0.24622 |
| STM4221   | pgi       | glucose-6-phosphate isomerase                  | <b>-0.47</b> | 0.35373 |
| STM4222,S | yjbE      | putative outer membrane protein                | <b>0.07</b>  | 0.88863 |
| STM4222,S | yjbE      | putative outer membrane protein                | <b>0.13</b>  | 0.81656 |
| STM4223   | yjbF      | putative outer membrane lipoprotein            | <b>-0.17</b> | 0.71404 |
| STM4223   | yjbF      | putative outer membrane lipoprotein            | <b>0.83</b>  | 0.21114 |
| STM4224   | yjbG      | putative periplasmic protein                   | <b>-0.11</b> | 0.87720 |
| STM4224   | yjbG      | putative periplasmic protein                   | <b>0.48</b>  | 0.29889 |
| STM4225   | yjbH      | putative outer membrane lipoprotein            | <b>-0.05</b> | 0.93485 |
| STM4225   | yjbH      | putative outer membrane lipoprotein            | <b>0.44</b>  | 0.37888 |
| STM4226   | yjbA      | phosphate-starvation-inducible protein PsiE    | <b>0.10</b>  | 0.85893 |
| STM4226   | yjbA      | phosphate-starvation-inducible protein PsiE    | <b>0.45</b>  | 0.36703 |
| STM4227   | malG      | maltose transport protein                      | <b>0.04</b>  | 0.97005 |
| STM4227   | malG      | maltose transport protein                      | <b>1.13</b>  | 0.31458 |
| STM4228   | malF      | maltose transport protein                      | <b>0.11</b>  | 0.89405 |
| STM4228   | malF      | maltose transport protein                      | <b>0.79</b>  | 0.17139 |
| STM4229   | malE      | periplasmic maltose-binding protein            | <b>1.10</b>  | 0.07318 |
| STM4229   | malE      | periplasmic maltose-binding protein            | <b>1.63</b>  | 0.07098 |
| STM4230   | malK      | maltose transport protein/repressor            | <b>1.65</b>  | 0.10754 |
| STM4230   | malK      | maltose transport protein/repressor            | <b>2.05</b>  | 0.01765 |

|         |         |                                                    |              |         |
|---------|---------|----------------------------------------------------|--------------|---------|
| STM4231 | lamB    | maltoporin precursor                               | <b>1.89</b>  | 0.13813 |
| STM4231 | lamB    | maltoporin precursor                               | <b>1.95</b>  | 0.09991 |
| STM4232 | malM    | periplasmic protein precursor                      | <b>0.40</b>  | 0.40227 |
| STM4232 | malM    | periplasmic protein precursor                      | <b>0.61</b>  | 0.19398 |
| STM4233 | ubiC    | chorismate pyruvate lyase                          | <b>0.01</b>  | 0.98896 |
| STM4233 | ubiC    | chorismate pyruvate lyase                          | <b>0.21</b>  | 0.54461 |
| STM4234 | ubiA    | 4-hydroxybenzoate octaprenyltransferase            | <b>-0.30</b> | 0.53840 |
| STM4234 | ubiA    | 4-hydroxybenzoate octaprenyltransferase            | <b>-0.03</b> | 0.94519 |
| STM4235 | plsB    | glycerol-3-phosphate acyltransferase               | <b>-0.32</b> | 0.48791 |
| STM4235 | plsB    | glycerol-3-phosphate acyltransferase               | <b>0.16</b>  | 0.77346 |
| STM4236 | dgkA    | diacylglycerol kinase                              | <b>-0.07</b> | 0.87254 |
| STM4236 | dgkA    | diacylglycerol kinase                              | <b>-0.10</b> | 0.81284 |
| STM4237 | lexA    | LexA repressor                                     | <b>0.15</b>  | 0.66460 |
| STM4237 | lexA    | LexA repressor                                     | <b>0.45</b>  | 0.34070 |
| STM4238 | dinF    | DNA-damage-inducible protein F                     | <b>-0.07</b> | 0.88085 |
| STM4238 | dinF    | DNA-damage-inducible protein F                     | <b>0.10</b>  | 0.79731 |
| STM4240 | yjbJ    | putative cytoplasmic protein                       | <b>-0.53</b> | 0.24571 |
| STM4240 | yjbJ    | putative cytoplasmic protein                       | <b>-0.05</b> | 0.91626 |
| STM4241 | zur     | transcriptional repressor                          | <b>-0.17</b> | 0.74779 |
| STM4241 | zur     | transcriptional repressor                          | <b>0.08</b>  | 0.89107 |
| STM4242 | STM4242 | conjugative transfer protein                       | <b>-0.46</b> | 0.62682 |
| STM4242 | STM4242 | conjugative transfer protein                       | <b>-0.09</b> | 0.90169 |
| STM4243 | yjbN    | hypothetical protein STM4243                       | <b>-0.29</b> | 0.51034 |
| STM4243 | yjbN    | hypothetical protein STM4243                       | <b>0.11</b>  | 0.77606 |
| STM4244 | pspG    | phage shock protein G                              | <b>-0.55</b> | 0.33452 |
| STM4244 | pspG    | phage shock protein G                              | <b>-0.06</b> | 0.91317 |
| STM4245 | qor     | quinone oxidoreductase                             | <b>-0.13</b> | 0.88647 |
| STM4245 | qor     | quinone oxidoreductase                             | <b>-0.26</b> | 0.58788 |
| STM4246 | dnaB    | replicative DNA helicase                           | <b>-0.09</b> | 0.82667 |
| STM4246 | dnaB    | replicative DNA helicase                           | <b>-0.04</b> | 0.92716 |
| STM4247 | alr     | alanine racemase                                   | <b>-0.33</b> | 0.43219 |
| STM4247 | alr     | alanine racemase                                   | <b>0.13</b>  | 0.75105 |
| STM4248 | tyrB    | aspartate aminotransferase                         | <b>0.29</b>  | 0.73801 |
| STM4248 | tyrB    | aspartate aminotransferase                         | <b>1.17</b>  | 0.16880 |
| STM4249 | aphA    | non-specific acid phosphatase/phosphotransferase   | <b>-0.11</b> | 0.83402 |
| STM4249 | aphA    | non-specific acid phosphatase/phosphotransferase   | <b>0.11</b>  | 0.87208 |
| STM4250 | yjbQ    | putative cytoplasmic protein                       | <b>0.06</b>  | 0.92262 |
| STM4250 | yjbQ    | putative cytoplasmic protein                       | <b>0.54</b>  | 0.31195 |
| STM4251 | yjbR    | putative cytoplasmic protein                       | <b>0.05</b>  | 0.93811 |
| STM4251 | yjbR    | putative cytoplasmic protein                       | <b>0.45</b>  | 0.38201 |
| STM4252 | STM4252 | putative inner membrane protein                    | <b>-0.18</b> | 0.66609 |
| STM4252 | STM4252 | putative inner membrane protein                    | <b>0.59</b>  | 0.29543 |
| STM4253 | STM4253 | putative outer membrane lipoprotein                | <b>0.25</b>  | 0.60265 |
| STM4253 | STM4253 | putative outer membrane lipoprotein                | <b>0.74</b>  | 0.26820 |
| STM4254 | uvrA    | excinuclease ABC subunit A                         | <b>0.01</b>  | 0.98290 |
| STM4254 | uvrA    | excinuclease ABC subunit A                         | <b>0.32</b>  | 0.63277 |
| STM4256 | ssb     | single-strand DNA-binding protein                  | <b>-0.43</b> | 0.37872 |
| STM4256 | ssb     | single-strand DNA-binding protein                  | <b>-0.19</b> | 0.67351 |
| STM4258 | STM4258 | putative methyl-accepting chemotaxis protein       | <b>0.72</b>  | 0.17754 |
| STM4258 | STM4258 | putative methyl-accepting chemotaxis protein       | <b>1.47</b>  | 0.07388 |
| STM4259 | STM4259 | putative ABC exporter outer membrane component     | <b>1.02</b>  | 0.11224 |
| STM4259 | STM4259 | putative ABC exporter outer membrane component     | <b>1.66</b>  | 0.02875 |
| STM4260 | STM4260 | predicted cation efflux pump                       | <b>1.03</b>  | 0.11268 |
| STM4260 | STM4260 | predicted cation efflux pump                       | <b>1.82</b>  | 0.04510 |
| STM4261 | STM4261 | putative inner membrane protein                    | <b>0.04</b>  | 0.95608 |
| STM4261 | STM4261 | putative inner membrane protein                    | <b>0.08</b>  | 0.92637 |
| STM4262 | STM4262 | putative ABC-type bacteriocin/lantibiotic exporter | <b>-0.60</b> | 0.20996 |
| STM4262 | STM4262 | putative ABC-type bacteriocin/lantibiotic exporter | <b>-0.08</b> | 0.90766 |
| STM4263 | yjcB    | putative inner membrane protein                    | <b>-0.64</b> | 0.18763 |
| STM4263 | yjcB    | putative inner membrane protein                    | <b>-0.21</b> | 0.69266 |
| STM4264 | yjcC    | putative diguanylate cyclase/phosphodiesterase     | <b>-0.28</b> | 0.74481 |
| STM4264 | yjcC    | putative diguanylate cyclase/phosphodiesterase     | <b>0.12</b>  | 0.76937 |
| STM4265 | soxS    | transcriptional activator                          | <b>-0.26</b> | 0.52712 |

|           |         |                                                 |              |         |
|-----------|---------|-------------------------------------------------|--------------|---------|
| STM4265   | soxS    | transcriptional activator                       | <b>0.08</b>  | 0.87126 |
| STM4266   | soxR    | redox-sensing transcriptional activator         | <b>-0.07</b> | 0.90797 |
| STM4266   | soxR    | redox-sensing transcriptional activator         | <b>0.16</b>  | 0.83855 |
| STM4267   | STM4267 | putative glutathione S-transferase              | <b>-0.61</b> | 0.42427 |
| STM4267   | STM4267 | putative glutathione S-transferase              | <b>-0.24</b> | 0.68491 |
| STM4268   | yjcD    | hypothetical protein STM4268                    | <b>-0.56</b> | 0.22358 |
| STM4268   | yjcD    | hypothetical protein STM4268                    | <b>-0.30</b> | 0.56786 |
| STM4269   | yjcE    | Na/H transport protein                          | <b>-0.52</b> | 0.35325 |
| STM4269   | yjcE    | Na/H transport protein                          | <b>-0.24</b> | 0.70048 |
| STM4270   | STM4270 | putative transcriptional regulator              | <b>-0.24</b> | 0.52408 |
| STM4270   | STM4270 | putative transcriptional regulator              | <b>0.79</b>  | 0.18763 |
| STM4271   | STM4271 | putative inner membrane protein                 | <b>-0.03</b> | 0.95608 |
| STM4271   | STM4271 | putative inner membrane protein                 | <b>0.30</b>  | 0.62617 |
| STM4272   | STM4272 | putative inner membrane protein                 | <b>0.19</b>  | 0.73473 |
| STM4272   | STM4272 | putative inner membrane protein                 | <b>0.85</b>  | 0.15859 |
| STM4273   | actP    | acetate permease                                | <b>-0.36</b> | 0.48086 |
| STM4273   | actP    | acetate permease                                | <b>0.11</b>  | 0.86702 |
| STM4274   | yjcH    | putative inner membrane protein                 | <b>0.71</b>  | 0.73473 |
| STM4274   | yjcH    | putative inner membrane protein                 | <b>1.47</b>  | 0.28861 |
| STM4275   | acs     | acetyl-coenzyme A synthetase                    | <b>-0.04</b> | 0.92513 |
| STM4275   | acs     | acetyl-coenzyme A synthetase                    | <b>0.65</b>  | 0.18740 |
| STM4277   | nrfA    | nitrite reductase periplasmic cytochrome c552   | <b>-0.07</b> | 0.93064 |
| STM4277   | nrfA    | nitrite reductase periplasmic cytochrome c552   | <b>0.86</b>  | 0.41422 |
| STM4278,S | nrfB    | formate-dependent nitrite reductase             | <b>0.13</b>  | 0.74354 |
| STM4278,S | nrfB    | formate-dependent nitrite reductase             | <b>0.92</b>  | 0.18426 |
| STM4279   | nrfC    | putative formate-dependent nitrite reductase    | <b>-0.24</b> | 0.57568 |
| STM4279   | nrfC    | putative formate-dependent nitrite reductase    | <b>0.46</b>  | 0.36942 |
| STM4280   | nrfD    | putative formate-dependent nitrate reductase    | <b>-0.16</b> | 0.75033 |
| STM4280   | nrfD    | putative formate-dependent nitrate reductase    | <b>0.32</b>  | 0.39499 |
| STM4281   | nrfE    | formate-dependent nitrite reductase             | <b>-0.14</b> | 0.91443 |
| STM4281   | nrfE    | formate-dependent nitrite reductase             | <b>0.42</b>  | 0.62494 |
| STM4282   | nrfG    | formate-dependent nitrite reductase component   | <b>0.10</b>  | 0.83443 |
| STM4282   | nrfG    | formate-dependent nitrite reductase component   | <b>0.44</b>  | 0.27004 |
| STM4283   | gltP    | glutamate/aspartate symport protein             | <b>-0.48</b> | 0.25125 |
| STM4283   | gltP    | glutamate/aspartate symport protein             | <b>0.21</b>  | 0.58095 |
| STM4284   | yjcO    | tetratricopeptide repeat protein                | <b>0.11</b>  | 0.77883 |
| STM4284   | yjcO    | tetratricopeptide repeat protein                | <b>0.30</b>  | 0.40337 |
| STM4285   | fdhF    | formate dehydrogenase                           | <b>-0.32</b> | 0.43899 |
| STM4285   | fdhF    | formate dehydrogenase                           | <b>0.58</b>  | 0.40562 |
| STM4286   | lpxO    | putative dioxygenase                            | <b>-0.23</b> | 0.69358 |
| STM4286   | lpxO    | putative dioxygenase                            | <b>0.40</b>  | 0.71973 |
| STM4287,S | phnO    | putative regulatory protein                     | <b>-0.30</b> | 0.73968 |
| STM4287,S | phnO    | putative regulatory protein                     | <b>-0.29</b> | 0.61048 |
| STM4288   | phnB    | putative cytoplasmic protein                    | <b>-0.29</b> | 0.41913 |
| STM4288   | phnB    | putative cytoplasmic protein                    | <b>-0.16</b> | 0.71169 |
| STM4289   | phnA    | putative alkylphosphonate uptake protein        | <b>-0.44</b> | 0.38200 |
| STM4289   | phnA    | putative alkylphosphonate uptake protein        | <b>0.03</b>  | 0.97333 |
| STM4290   | proP    | low-affinity proline transporter                | <b>-0.93</b> | 0.17211 |
| STM4290   | proP    | low-affinity proline transporter                | <b>0.02</b>  | 0.97443 |
| STM4291   | basS    | sensor kinase                                   | <b>-1.06</b> | 0.10012 |
| STM4291   | basS    | sensor kinase                                   | <b>-1.74</b> | 0.21393 |
| STM4292   | basR    | response regulator                              | <b>-0.92</b> | 0.09679 |
| STM4292   | basR    | response regulator                              | <b>-1.00</b> | 0.12549 |
| STM4293   | yjdB    | putative integral membrane protein              | <b>-2.27</b> | 0.01937 |
| STM4293   | yjdB    | putative integral membrane protein              | <b>-1.64</b> | 0.04232 |
| STM4294   | yjdB    | putative putrescine/ornithine transport protein | <b>-1.13</b> | 0.07318 |
| STM4294   | yjdB    | putative putrescine/ornithine transport protein | <b>-0.98</b> | 0.07353 |
| STM4295   | adiY    | transcriptional activator                       | <b>-0.76</b> | 0.34553 |
| STM4295   | adiY    | transcriptional activator                       | <b>-0.22</b> | 0.74091 |
| STM4296   | adi     | catabolic arginine decarboxylase                | <b>-0.44</b> | 0.41631 |
| STM4296   | adi     | catabolic arginine decarboxylase                | <b>0.12</b>  | 0.84611 |
| STM4297   | melR    | melibiose operon regulator                      | <b>0.42</b>  | 0.69882 |
| STM4297   | melR    | melibiose operon regulator                      | <b>0.68</b>  | 0.45419 |

|           |           |                                                          |              |         |
|-----------|-----------|----------------------------------------------------------|--------------|---------|
| STM4298   | mclA      | alpha-galactosidase                                      | <b>-0.32</b> | 0.59096 |
| STM4298   | mclA      | alpha-galactosidase                                      | <b>1.00</b>  | 0.25102 |
| STM4299   | mclB      | melibiose permease II                                    | <b>0.19</b>  | 0.65285 |
| STM4299   | mclB      | melibiose permease II                                    | <b>0.77</b>  | 0.17919 |
| STM4300   | fumB      | fumarase B                                               | <b>-0.12</b> | 0.79096 |
| STM4300   | fumB      | fumarase B                                               | <b>0.21</b>  | 0.74812 |
| STM4301   | dcuB      | anaerobic C4-dicarboxylate transporter                   | <b>-0.17</b> | 0.70249 |
| STM4301   | dcuB      | anaerobic C4-dicarboxylate transporter                   | <b>-0.07</b> | 0.88953 |
| STM4302   | STM4302   | putative cytoplasmic protein                             | <b>-0.51</b> | 0.48837 |
| STM4302   | STM4302   | putative cytoplasmic protein                             | <b>0.40</b>  | 0.46385 |
| STM4303   | dcuR      | response regulator                                       | <b>0.00</b>  | 0.99938 |
| STM4303   | dcuR      | response regulator                                       | <b>-0.28</b> | 0.60311 |
| STM4304   | dcuS      | sensory histidine kinase                                 | <b>-0.51</b> | 0.27696 |
| STM4304   | dcuS      | sensory histidine kinase                                 | <b>-0.07</b> | 0.90318 |
| STM4305,S | STM4305,S | putative anaerobic dimethylsulfoxide reductase subunit A | <b>-0.11</b> | 0.90671 |
| STM4305,S | STM4305,S | putative anaerobic dimethylsulfoxide reductase subunit A | <b>0.51</b>  | 0.31146 |
| STM4306   | STM4306   | putative anaerobic dimethylsulfoxide reductase subunit B | <b>-0.62</b> | 0.31280 |
| STM4306   | STM4306   | putative anaerobic dimethylsulfoxide reductase subunit B | <b>0.82</b>  | 0.30748 |
| STM4307   | STM4307   | putative anaerobic dimethylsulfoxide reductase subunit C | <b>-0.21</b> | 0.81896 |
| STM4307   | STM4307   | putative anaerobic dimethylsulfoxide reductase subunit C | <b>0.02</b>  | 0.98013 |
| STM4308   | STM4308   | putative anaerobic dehydrogenase component               | <b>-0.70</b> | 0.34633 |
| STM4308   | STM4308   | putative anaerobic dehydrogenase component               | <b>0.16</b>  | 0.76694 |
| STM4309   | STM4309   | hypothetical protein STM4309                             | <b>-0.28</b> | 0.43778 |
| STM4309   | STM4309   | hypothetical protein STM4309                             | <b>0.64</b>  | 0.47656 |
| STM4310   | STM4310   | putative inner membrane protein                          | <b>-0.92</b> | 0.21933 |
| STM4310   | STM4310   | putative inner membrane protein                          | <b>-0.35</b> | 0.76387 |
| STM4312   | STM4312   | hypothetical protein STM4312                             | <b>0.12</b>  | 0.91111 |
| STM4312   | STM4312   | hypothetical protein STM4312                             | <b>-0.06</b> | 0.94050 |
| STM4313   | STM4313   | putative cytoplasmic protein                             | <b>0.03</b>  | 0.96785 |
| STM4313   | STM4313   | putative cytoplasmic protein                             | <b>0.46</b>  | 0.26261 |
| STM4314   | STM4314   | putative regulatory protein                              | <b>0.01</b>  | 0.98622 |
| STM4314   | STM4314   | putative regulatory protein                              | <b>0.26</b>  | 0.52511 |
| STM4315   | STM4315   | putative DNA-binding protein                             | <b>0.63</b>  | 0.29510 |
| STM4315   | STM4315   | putative DNA-binding protein                             | <b>1.36</b>  | 0.08059 |
| STM4317   | STM4317   | hypothetical protein STM4317                             | <b>-0.39</b> | 0.33587 |
| STM4317   | STM4317   | hypothetical protein STM4317                             | <b>0.14</b>  | 0.84249 |
| STM4318   | STM4318   | putative acetyltransferase                               | <b>-0.57</b> | 0.25460 |
| STM4318   | STM4318   | putative acetyltransferase                               | <b>-0.51</b> | 0.24520 |
| STM4319   | phoN      | non-specific acid phosphatase                            | <b>-1.17</b> | 0.08983 |
| STM4319   | phoN      | non-specific acid phosphatase                            | <b>-0.74</b> | 0.16281 |
| STM4322   | yjdC      | putative regulatory protein                              | <b>-0.04</b> | 0.93011 |
| STM4322   | yjdC      | putative regulatory protein                              | <b>0.09</b>  | 0.86233 |
| STM4323   | dsbD      | thiol:disulfide interchange protein precursor            | <b>-0.44</b> | 0.26910 |
| STM4323   | dsbD      | thiol:disulfide interchange protein precursor            | <b>0.10</b>  | 0.89004 |
| STM4324   | cutA      | putative periplasmic divalent cation tolerance protein   | <b>-0.07</b> | 0.86680 |
| STM4324   | cutA      | putative periplasmic divalent cation tolerance protein   | <b>0.76</b>  | 0.17139 |
| STM4325   | dcuA      | anaerobic C4-dicarboxylate transporter                   | <b>-0.21</b> | 0.56040 |
| STM4325   | dcuA      | anaerobic C4-dicarboxylate transporter                   | <b>0.00</b>  | 0.99938 |
| STM4326   | aspA      | aspartate ammonia-lyase                                  | <b>0.18</b>  | 0.74481 |
| STM4326   | aspA      | aspartate ammonia-lyase                                  | <b>0.01</b>  | 0.98976 |
| STM4327   | fxsA      | suppressor of F exclusion of bacteriophage T7            | <b>-0.37</b> | 0.55956 |
| STM4327   | fxsA      | suppressor of F exclusion of bacteriophage T7            | <b>-0.34</b> | 0.40947 |
| STM4328   | yjeH      | putative transporter                                     | <b>-0.06</b> | 0.88998 |
| STM4328   | yjeH      | putative transporter                                     | <b>-0.18</b> | 0.65762 |
| STM4329   | groES     | co-chaperonin GroES                                      | <b>-0.27</b> | 0.57021 |
| STM4329   | groES     | co-chaperonin GroES                                      | <b>-0.13</b> | 0.78257 |
| STM4330   | groEL     | chaperonin GroEL                                         | <b>-1.03</b> | 0.13206 |

|           |         |                                                    |              |         |
|-----------|---------|----------------------------------------------------|--------------|---------|
| STM4330   | groEL   | chaperonin GroEL                                   | <b>-1.07</b> | 0.08174 |
| STM4331   | yjeI    | putative outer membrane lipoprotein                | <b>-0.40</b> | 0.31280 |
| STM4331   | yjeI    | putative outer membrane lipoprotein                | <b>-0.35</b> | 0.39238 |
| STM4332   | yjeJ    | putative inner membrane protein                    | <b>-0.34</b> | 0.34193 |
| STM4332   | yjeJ    | putative inner membrane protein                    | <b>-0.21</b> | 0.61201 |
| STM4333   | yjeK    | putative aminomutase                               | <b>-0.48</b> | 0.24995 |
| STM4333   | yjeK    | putative aminomutase                               | <b>0.03</b>  | 0.96228 |
| STM4334   | efp     | elongation factor P                                | <b>-0.29</b> | 0.45676 |
| STM4334   | efp     | elongation factor P                                | <b>0.24</b>  | 0.63688 |
| STM4335   | ecnA    | putative entericidin A precursor                   | <b>-0.04</b> | 0.95025 |
| STM4335   | ecnA    | putative entericidin A precursor                   | <b>0.18</b>  | 0.63955 |
| STM4337   | ecnR    | putative regulatory protein                        | <b>-0.43</b> | 0.34201 |
| STM4337   | ecnR    | putative regulatory protein                        | <b>-0.09</b> | 0.88977 |
| STM4338   | sugE    | putative DMT superfamily transport protein         | <b>-0.26</b> | 0.52543 |
| STM4338   | sugE    | putative DMT superfamily transport protein         | <b>-0.12</b> | 0.82637 |
| STM4339   | blc     | outer membrane lipoprotein precursor               | <b>-0.04</b> | 0.94050 |
| STM4339   | blc     | outer membrane lipoprotein precursor               | <b>0.59</b>  | 0.22602 |
| STM4340   | frdD    | fumarate reductase subunit D                       | <b>-0.08</b> | 0.87999 |
| STM4340   | frdD    | fumarate reductase subunit D                       | <b>0.24</b>  | 0.56860 |
| STM4341   | frdC    | fumarate reductase subunit C                       | <b>0.14</b>  | 0.74669 |
| STM4341   | frdC    | fumarate reductase subunit C                       | <b>-0.09</b> | 0.85743 |
| STM4342   | frdB    | succinate dehydrogenase                            | <b>0.43</b>  | 0.36942 |
| STM4342   | frdB    | succinate dehydrogenase                            | <b>0.62</b>  | 0.17754 |
| STM4343   | frdA    | fumarate reductase                                 | <b>0.04</b>  | 0.94180 |
| STM4343   | frdA    | fumarate reductase                                 | <b>0.64</b>  | 0.17139 |
| STM4344   | yjeA    | lysyl-tRNA synthetase                              | <b>-0.33</b> | 0.46184 |
| STM4344   | yjeA    | lysyl-tRNA synthetase                              | <b>-0.30</b> | 0.62682 |
| STM4345   | yjeM    | putative amino-acid transport protein              | <b>-0.32</b> | 0.65730 |
| STM4345   | yjeM    | putative amino-acid transport protein              | <b>0.08</b>  | 0.89617 |
| STM4346   | yjeO    | putative inner membrane protein                    | <b>-0.01</b> | 0.99182 |
| STM4346   | yjeO    | putative inner membrane protein                    | <b>0.00</b>  | 0.99770 |
| STM4347   | yjeP    | putative periplasmic binding protein               | <b>-0.14</b> | 0.79176 |
| STM4347   | yjeP    | putative periplasmic binding protein               | <b>0.07</b>  | 0.87910 |
| STM4348   | psd     | phosphatidylserine decarboxylase                   | <b>-0.39</b> | 0.30501 |
| STM4348   | psd     | phosphatidylserine decarboxylase                   | <b>0.07</b>  | 0.86702 |
| STM4349   | yjeQ    | ribosome-associated GTPase                         | <b>0.06</b>  | 0.88705 |
| STM4349   | yjeQ    | ribosome-associated GTPase                         | <b>0.15</b>  | 0.80571 |
| STM4350   | orn     | oligoribonuclease                                  | <b>-0.22</b> | 0.61170 |
| STM4350   | orn     | oligoribonuclease                                  | <b>0.33</b>  | 0.42811 |
| STM4351   | STM4351 | putative arginine-binding periplasmic protein      | <b>-0.05</b> | 0.93367 |
| STM4351   | STM4351 | putative arginine-binding periplasmic protein      | <b>-0.01</b> | 0.98749 |
| STM4355,S | yjeS    | putative FeS protein                               | <b>-0.85</b> | 0.14285 |
| STM4355,S | yjeS    | putative FeS protein                               | <b>-0.31</b> | 0.50572 |
| STM4356   | yjeF    | putative sugar kinase                              | <b>-0.26</b> | 0.65025 |
| STM4356   | yjeF    | putative sugar kinase                              | <b>0.05</b>  | 0.90733 |
| STM4357   | yjeE    | putative nucleotide-binding protein                | <b>0.01</b>  | 0.98034 |
| STM4357   | yjeE    | putative nucleotide-binding protein                | <b>0.23</b>  | 0.56565 |
| STM4358   | amiB    | N-acetylmuramoyl-L-alanine amidase II              | <b>-0.06</b> | 0.91459 |
| STM4358   | amiB    | N-acetylmuramoyl-L-alanine amidase II              | <b>-0.05</b> | 0.93970 |
| STM4359   | mutL    | DNA mismatch repair protein                        | <b>-0.28</b> | 0.48668 |
| STM4359   | mutL    | DNA mismatch repair protein                        | <b>0.02</b>  | 0.97333 |
| STM4360   | miaA    | tRNA delta(2)-isopentenylpyrophosphate transferase | <b>-0.05</b> | 0.92637 |
| STM4360   | miaA    | tRNA delta(2)-isopentenylpyrophosphate transferase | <b>0.10</b>  | 0.81359 |
| STM4361   | hfq     | RNA-binding protein Hfq                            | <b>-0.11</b> | 0.78973 |
| STM4361   | hfq     | RNA-binding protein Hfq                            | <b>-0.02</b> | 0.96018 |
| STM4362   | hflX    | putative GTP-ase                                   | <b>-0.04</b> | 0.95412 |
| STM4362   | hflX    | putative GTP-ase                                   | <b>0.13</b>  | 0.78016 |
| STM4363   | hflK    | FtsH modulator                                     | <b>-0.25</b> | 0.58624 |
| STM4363   | hflK    | FtsH modulator                                     | <b>-0.17</b> | 0.81383 |
| STM4364   | hflC    | FtsH modulator                                     | <b>-0.16</b> | 0.64335 |
| STM4364   | hflC    | FtsH modulator                                     | <b>0.13</b>  | 0.78335 |
| STM4365   | yjeT    | putative inner membrane protein                    | <b>-0.35</b> | 0.34553 |
| STM4365   | yjeT    | putative inner membrane protein                    | <b>0.11</b>  | 0.77411 |

|           |         |                                                     |              |         |
|-----------|---------|-----------------------------------------------------|--------------|---------|
| STM4366   | purA    | adenylosuccinate synthetase                         | <b>-0.47</b> | 0.20285 |
| STM4366   | purA    | adenylosuccinate synthetase                         | <b>-0.14</b> | 0.72149 |
| STM4367   | yjeB    | putative negative regulator                         | <b>-0.25</b> | 0.51697 |
| STM4367   | yjeB    | putative negative regulator                         | <b>0.24</b>  | 0.54624 |
| STM4368   | vacB    | putative exoribonuclease                            | <b>-0.21</b> | 0.64921 |
| STM4368   | vacB    | putative exoribonuclease                            | <b>0.03</b>  | 0.95565 |
| STM4369   | yjfH    | putative tRNA/rRNA methyltransferase                | <b>-0.09</b> | 0.83897 |
| STM4369   | yjfH    | putative tRNA/rRNA methyltransferase                | <b>-0.22</b> | 0.66768 |
| STM4370   | yjfl    | putative cytoplasmic protein                        | <b>-0.10</b> | 0.86828 |
| STM4370   | yjfl    | putative cytoplasmic protein                        | <b>0.46</b>  | 0.32848 |
| STM4371   | yjfJ    | putative phage shock protein A                      | <b>0.40</b>  | 0.58541 |
| STM4371   | yjfJ    | putative phage shock protein A                      | <b>0.98</b>  | 0.24515 |
| STM4372   | STM4372 | putative potassium channels                         | <b>-0.27</b> | 0.48590 |
| STM4372   | STM4372 | putative potassium channels                         | <b>0.10</b>  | 0.82637 |
| STM4373   | yjfK    | putative cytoplasmic protein                        | <b>-0.25</b> | 0.64394 |
| STM4373   | yjfK    | putative cytoplasmic protein                        | <b>0.35</b>  | 0.41541 |
| STM4374   | yjfL    | putative inner membrane protein                     | <b>-0.04</b> | 0.97333 |
| STM4374   | yjfL    | putative inner membrane protein                     | <b>0.42</b>  | 0.42811 |
| STM4375   | yjfM    | putative inner membrane protein                     | <b>-0.44</b> | 0.34553 |
| STM4375   | yjfM    | putative inner membrane protein                     | <b>-0.08</b> | 0.89529 |
| STM4376   | yjfC    | putative glutathionylspermidine synthase            | <b>-0.32</b> | 0.49932 |
| STM4376   | yjfC    | putative glutathionylspermidine synthase            | <b>0.13</b>  | 0.85465 |
| STM4377   | aidB    | putative acyl-CoA dehydrogenase                     | <b>0.93</b>  | 0.52208 |
| STM4377   | aidB    | putative acyl-CoA dehydrogenase                     | <b>1.69</b>  | 0.30082 |
| STM4378   | yjfN    | putative inner membrane protein                     | <b>-0.15</b> | 0.81621 |
| STM4378   | yjfN    | putative inner membrane protein                     | <b>0.71</b>  | 0.17118 |
| STM4379   | yjfO    | putative lipoprotein                                | <b>0.10</b>  | 0.81449 |
| STM4379   | yjfO    | putative lipoprotein                                | <b>0.52</b>  | 0.27651 |
| STM4380   | yjfP    | putative hydrolase                                  | <b>0.05</b>  | 0.94990 |
| STM4380   | yjfP    | putative hydrolase                                  | <b>0.25</b>  | 0.65974 |
| STM4381   | yjfQ    | putative transcriptional repressor                  | <b>-0.38</b> | 0.55008 |
| STM4381   | yjfQ    | putative transcriptional repressor                  | <b>-0.17</b> | 0.71490 |
| STM4382   | yjfR    | putative Zn-dependent hydrolase                     | <b>-0.06</b> | 0.90071 |
| STM4382   | yjfR    | putative Zn-dependent hydrolase                     | <b>-0.13</b> | 0.78929 |
| STM4383,S | ulaA    | ascorbate-specific PTS system enzyme IIC            | <b>0.05</b>  | 0.91584 |
| STM4383,S | ulaA    | ascorbate-specific PTS system enzyme IIC            | <b>1.14</b>  | 0.27525 |
| STM4384   | sgaB    | putative PTS enzyme II                              | <b>-0.14</b> | 0.83102 |
| STM4384   | sgaB    | putative PTS enzyme II                              | <b>0.10</b>  | 0.85372 |
| STM4385   | ptxA    | putative PTS enzyme II                              | <b>-0.45</b> | 0.27035 |
| STM4385   | ptxA    | putative PTS enzyme II                              | <b>0.27</b>  | 0.79741 |
| STM4386   | sgaH    | putative hexulose phosphate synthase                | <b>0.06</b>  | 0.90797 |
| STM4386   | sgaH    | putative hexulose phosphate synthase                | <b>0.77</b>  | 0.13206 |
| STM4387   | sgaU    | putative hexulose-6-phosphate isomerase             | <b>-0.83</b> | 0.24995 |
| STM4387   | sgaU    | putative hexulose-6-phosphate isomerase             | <b>-0.29</b> | 0.53591 |
| STM4388   | sgaE    | L-ribulose-5-phosphate 4-epimerase                  | <b>0.28</b>  | 0.42940 |
| STM4388   | sgaE    | L-ribulose-5-phosphate 4-epimerase                  | <b>0.31</b>  | 0.57616 |
| STM4389   | yjfY    | putative outer membrane protein                     | <b>0.02</b>  | 0.97716 |
| STM4389   | yjfY    | putative outer membrane protein                     | <b>0.16</b>  | 0.74669 |
| STM4391   | rpsF    | 30S ribosomal protein S6                            | <b>-0.20</b> | 0.61364 |
| STM4391   | rpsF    | 30S ribosomal protein S6                            | <b>-0.03</b> | 0.94417 |
| STM4393   | rpsR    | 30S ribosomal protein S18                           | <b>0.18</b>  | 0.66731 |
| STM4393   | rpsR    | 30S ribosomal protein S18                           | <b>0.20</b>  | 0.57021 |
| STM4394   | rpII    | 50S ribosomal protein L9                            | <b>0.06</b>  | 0.90440 |
| STM4394   | rpII    | 50S ribosomal protein L9                            | <b>-0.02</b> | 0.96805 |
| STM4395   | yifZ    | putative permease                                   | <b>-0.43</b> | 0.36270 |
| STM4395   | yifZ    | putative permease                                   | <b>0.51</b>  | 0.26905 |
| STM4396   | ytfB    | putative cell envelope opacity-associated protein A | <b>-0.21</b> | 0.68136 |
| STM4396   | ytfB    | putative cell envelope opacity-associated protein A | <b>0.14</b>  | 0.75676 |
| STM4397   | fkIB    | FKBP-type 22KD peptidyl-prolyl cis-trans isomerase  | <b>-0.26</b> | 0.55255 |
| STM4397   | fkIB    | FKBP-type 22KD peptidyl-prolyl cis-trans isomerase  | <b>0.18</b>  | 0.60890 |
| STM4398   | cycA    | D-alanine/D-serine/glycine transport protein        | <b>0.17</b>  | 0.69882 |
| STM4398   | cycA    | D-alanine/D-serine/glycine transport protein        | <b>0.22</b>  | 0.62248 |
| STM4399   | ytfE    | putative cell morphogenesis protein                 | <b>-0.28</b> | 0.62867 |

|           |           |                                                                     |              |         |
|-----------|-----------|---------------------------------------------------------------------|--------------|---------|
| STM4399   | ytfE      | putative cell morphogenesis protein                                 | <b>0.30</b>  | 0.46539 |
| STM4400   | ytfF      | putative cationic amino acid transporter                            | <b>0.18</b>  | 0.75479 |
| STM4400   | ytfF      | putative cationic amino acid transporter                            | <b>0.66</b>  | 0.36162 |
| STM4401   | ytfG      | putative reductase                                                  | <b>0.13</b>  | 0.85630 |
| STM4401   | ytfG      | putative reductase                                                  | <b>0.25</b>  | 0.70229 |
| STM4402   | ytfH      | putative transcriptional regulator                                  | <b>-0.23</b> | 0.54741 |
| STM4402   | ytfH      | putative transcriptional regulator                                  | <b>-0.14</b> | 0.76008 |
| STM4403   | cpdB      | 2',3'-cyclic nucleotide 2'-phosphodiesterase/3'-nucleotidase        | <b>-0.06</b> | 0.91585 |
| STM4403   | cpdB      | 2',3'-cyclic nucleotide 2'-phosphodiesterase/3'-nucleotidase        | <b>0.49</b>  | 0.32481 |
| STM4404   | cysQ      | sulfite biosynthetic protein                                        | <b>-0.40</b> | 0.36066 |
| STM4404   | cysQ      | sulfite biosynthetic protein                                        | <b>0.19</b>  | 0.65431 |
| STM4405   | ytfJ      | putative transcriptional regulator                                  | <b>-0.38</b> | 0.52101 |
| STM4405   | ytfJ      | putative transcriptional regulator                                  | <b>0.03</b>  | 0.96682 |
| STM4406,S | ytfK      | putative cytoplasmic protein                                        | <b>0.19</b>  | 0.91170 |
| STM4406,S | ytfK      | putative cytoplasmic protein                                        | <b>0.62</b>  | 0.61481 |
| STM4407   | ytfL      | putative hemolysin-like protein                                     | <b>-1.12</b> | 0.08324 |
| STM4407   | ytfL      | putative hemolysin-like protein                                     | <b>-0.22</b> | 0.70185 |
| STM4408   | msrA      | methionine sulfoxide reductase A                                    | <b>-0.07</b> | 0.91387 |
| STM4408   | msrA      | methionine sulfoxide reductase A                                    | <b>0.16</b>  | 0.77847 |
| STM4409   | ytfM      | putative outer membrane protein                                     | <b>-0.07</b> | 0.87740 |
| STM4409   | ytfM      | putative outer membrane protein                                     | <b>0.32</b>  | 0.45418 |
| STM4410   | ytfN      | putative periplasmic protein                                        | <b>0.03</b>  | 0.94426 |
| STM4410   | ytfN      | putative periplasmic protein                                        | <b>0.21</b>  | 0.61720 |
| STM4411   | ytfP      | putative cytoplasmic protein                                        | <b>-0.04</b> | 0.93841 |
| STM4411   | ytfP      | putative cytoplasmic protein                                        | <b>0.01</b>  | 0.98445 |
| STM4412   | STM4412   | putative permease                                                   | <b>-0.10</b> | 0.86895 |
| STM4412   | STM4412   | putative permease                                                   | <b>0.30</b>  | 0.64590 |
| STM4413   | STM4413   | dihydroorotase                                                      | <b>-0.10</b> | 0.90665 |
| STM4413   | STM4413   | dihydroorotase                                                      | <b>0.18</b>  | 0.76586 |
| STM4414   | ppa       | inorganic pyrophosphatase                                           | <b>-0.51</b> | 0.32859 |
| STM4414   | ppa       | inorganic pyrophosphatase                                           | <b>-0.29</b> | 0.63148 |
| STM4415   | fbp       | fructose-1,6-bisphosphatase                                         | <b>0.20</b>  | 0.61201 |
| STM4415   | fbp       | fructose-1,6-bisphosphatase                                         | <b>0.23</b>  | 0.58570 |
| STM4416   | mpl       | UDP-N-acetylmuramate/L-alanyl-gamma-D-glutamyl-meso-diaminopimelate | <b>-0.40</b> | 0.40227 |
| STM4416   | mpl       | UDP-N-acetylmuramate/L-alanyl-gamma-D-glutamyl-meso-diaminopimelate | <b>0.29</b>  | 0.50474 |
| STM4417   | STM4417   | putative transcriptional regulator                                  | <b>-0.31</b> | 0.38552 |
| STM4417   | STM4417   | putative transcriptional regulator                                  | <b>0.22</b>  | 0.69797 |
| STM4418   | STM4418   | sugar transporter                                                   | <b>-0.11</b> | 0.81943 |
| STM4418   | STM4418   | sugar transporter                                                   | <b>0.47</b>  | 0.45374 |
| STM4419   | STM4419   | sugar transporter                                                   | <b>-0.38</b> | 0.58548 |
| STM4419   | STM4419   | sugar transporter                                                   | <b>0.77</b>  | 0.22788 |
| STM4420   | STM4420   | putative inner membrane protein                                     | <b>-0.24</b> | 0.70229 |
| STM4420   | STM4420   | putative inner membrane protein                                     | <b>0.06</b>  | 0.94725 |
| STM4421   | STM4421   | putative NAD-dependent aldehyde dehydrogenase                       | <b>-0.21</b> | 0.74127 |
| STM4421   | STM4421   | putative NAD-dependent aldehyde dehydrogenase                       | <b>0.11</b>  | 0.86861 |
| STM4423   | STM4423   | putative DNA-binding protein                                        | <b>-0.05</b> | 0.94180 |
| STM4423   | STM4423   | putative DNA-binding protein                                        | <b>0.87</b>  | 0.22540 |
| STM4424,S | STM4424,S | putative endonuclease                                               | <b>-0.07</b> | 0.94496 |
| STM4424,S | STM4424,S | putative endonuclease                                               | <b>0.15</b>  | 0.80002 |
| STM4425   | STM4425   | putative dehydrogenase                                              | <b>-0.58</b> | 0.24520 |
| STM4425   | STM4425   | putative dehydrogenase                                              | <b>-0.28</b> | 0.68136 |
| STM4426   | srfJ      | lysosomal glucosyl ceramidase-like protein                          | <b>0.10</b>  | 0.84560 |
| STM4426   | srfJ      | lysosomal glucosyl ceramidase-like protein                          | <b>0.51</b>  | 0.35824 |
| STM4427   | STM4427   | putative endonuclease                                               | <b>0.09</b>  | 0.91139 |
| STM4427   | STM4427   | putative endonuclease                                               | <b>0.60</b>  | 0.34541 |
| STM4428   | STM4428   | hypothetical protein STM4428                                        | <b>0.24</b>  | 0.56810 |
| STM4428   | STM4428   | hypothetical protein STM4428                                        | <b>0.35</b>  | 0.60936 |
| STM4433   | STM4433   | myo-inositol 2-dehydrogenase                                        | <b>-0.05</b> | 0.95747 |
| STM4433   | STM4433   | myo-inositol 2-dehydrogenase                                        | <b>0.82</b>  | 0.11690 |

|            |            |                                                                   |              |         |
|------------|------------|-------------------------------------------------------------------|--------------|---------|
| STM4434    | STM4434    | putative permease                                                 | <b>-0.40</b> | 0.43219 |
| STM4434    | STM4434    | putative permease                                                 | <b>0.14</b>  | 0.72580 |
| STM4435    | STM4435    | putative cytoplasmic protein                                      | <b>-0.28</b> | 0.46088 |
| STM4435    | STM4435    | putative cytoplasmic protein                                      | <b>0.22</b>  | 0.66837 |
| STM4436    | STM4436    | putative endonuclease                                             | <b>-0.66</b> | 0.19398 |
| STM4436    | STM4436    | putative endonuclease                                             | <b>-0.29</b> | 0.43550 |
| STM4437    | yjgA       | hypothetical protein STM4437                                      | <b>-0.36</b> | 0.53686 |
| STM4437    | yjgA       | hypothetical protein STM4437                                      | <b>-0.27</b> | 0.72976 |
| STM4438    | pmbA       | putative antibiotic maturation protein                            | <b>-0.12</b> | 0.78211 |
| STM4438    | pmbA       | putative antibiotic maturation protein                            | <b>-0.18</b> | 0.72104 |
| STM4439    | cybC       | cytochrome b562                                                   | <b>-0.40</b> | 0.32172 |
| STM4439    | cybC       | cytochrome b562                                                   | <b>-0.15</b> | 0.77923 |
| STM4440    | STM4440    | putative cytoplasmic protein                                      | <b>-0.05</b> | 0.92759 |
| STM4440    | STM4440    | putative cytoplasmic protein                                      | <b>0.02</b>  | 0.96785 |
| STM4441    | STM4441    | putative cytoplasmic protein                                      | <b>-0.12</b> | 0.89445 |
| STM4441    | STM4441    | putative cytoplasmic protein                                      | <b>-0.24</b> | 0.62216 |
| STM4442    | STM4442    | putative cytoplasmic protein                                      | <b>0.20</b>  | 0.69474 |
| STM4442    | STM4442    | putative cytoplasmic protein                                      | <b>0.60</b>  | 0.21501 |
| STM4443    | STM4443    | putative inner membrane protein                                   | <b>-0.67</b> | 0.15276 |
| STM4443    | STM4443    | putative inner membrane protein                                   | <b>0.07</b>  | 0.87727 |
| STM4444    | STM4444    | putative inner membrane protein                                   | <b>-0.34</b> | 0.52728 |
| STM4444    | STM4444    | putative inner membrane protein                                   | <b>0.50</b>  | 0.38668 |
| STM4445    | STM4445    | dihydroorotase                                                    | <b>-0.30</b> | 0.59509 |
| STM4445    | STM4445    | dihydroorotase                                                    | <b>0.63</b>  | 0.30162 |
| STM4446    | STM4446    | putative selenocysteine synthase                                  | <b>-0.08</b> | 0.91387 |
| STM4446    | STM4446    | putative selenocysteine synthase                                  | <b>0.11</b>  | 0.80672 |
| STM4447    | STM4447    | putative periplasmic protein                                      | <b>-0.19</b> | 0.66969 |
| STM4447    | STM4447    | putative periplasmic protein                                      | <b>0.40</b>  | 0.45664 |
| STM4448    | STM4448    | putative phosphotransferase system mannitol/fructose-specific IIA | <b>-0.24</b> | 0.54624 |
| STM4448    | STM4448    | putative phosphotransferase system mannitol/fructose-specific IIA | <b>0.31</b>  | 0.51973 |
| STM4449    | STM4449    | putative regulatory protein                                       | <b>-0.25</b> | 0.61443 |
| STM4449    | STM4449    | putative regulatory protein                                       | <b>0.17</b>  | 0.76240 |
| STM4450    | STM4450    | putative inner membrane protein                                   | <b>-0.26</b> | 0.52402 |
| STM4450    | STM4450    | putative inner membrane protein                                   | <b>0.45</b>  | 0.42732 |
| STM4451    | nrdG       | anaerobic ribonucleotide reductase activating protein             | <b>0.06</b>  | 0.91531 |
| STM4451    | nrdG       | anaerobic ribonucleotide reductase activating protein             | <b>0.24</b>  | 0.54136 |
| STM4452    | nrdD       | anaerobic ribonucleoside triphosphate reductase                   | <b>-0.54</b> | 0.22393 |
| STM4452    | nrdD       | anaerobic ribonucleoside triphosphate reductase                   | <b>0.27</b>  | 0.64489 |
| STM4452,1N | STM4452,1N | hypothetical protein STM4452,1N                                   | <b>-0.09</b> | 0.89487 |
| STM4452,1N | STM4452,1N | hypothetical protein STM4452,1N                                   | <b>0.12</b>  | 0.81323 |
| STM4453    | treC       | trehalose-6-phosphate hydrolase                                   | <b>-0.37</b> | 0.46266 |
| STM4453    | treC       | trehalose-6-phosphate hydrolase                                   | <b>0.32</b>  | 0.65128 |
| STM4455    | treR       | trehalose repressor                                               | <b>0.26</b>  | 0.83190 |
| STM4455    | treR       | trehalose repressor                                               | <b>0.86</b>  | 0.15466 |
| STM4456    | mgtA       | Mg2+ ATPase transporter                                           | <b>-0.67</b> | 0.13824 |
| STM4456    | mgtA       | Mg2+ ATPase transporter                                           | <b>-0.44</b> | 0.32770 |
| STM4457    | STM4457    | putative transposase                                              | <b>-0.44</b> | 0.42957 |
| STM4457    | STM4457    | putative transposase                                              | <b>-0.48</b> | 0.39069 |
| STM4458    | yjgF       | putative translation initiation inhibitor                         | <b>-0.15</b> | 0.76008 |
| STM4458    | yjgF       | putative translation initiation inhibitor                         | <b>0.04</b>  | 0.95608 |
| STM4459    | pyrI       | aspartate carbamoyltransferase regulatory subunit                 | <b>-0.47</b> | 0.28030 |
| STM4459    | pyrI       | aspartate carbamoyltransferase regulatory subunit                 | <b>-0.19</b> | 0.59096 |
| STM4460    | pyrB       | aspartate carbamoyltransferase catalytic subunit                  | <b>-0.14</b> | 0.76553 |
| STM4460    | pyrB       | aspartate carbamoyltransferase catalytic subunit                  | <b>-0.10</b> | 0.81709 |
| STM4463    | STM4463    | putative arginine repressor                                       | <b>-0.53</b> | 0.18447 |
| STM4463    | STM4463    | putative arginine repressor                                       | <b>0.02</b>  | 0.97645 |
| STM4464    | STM4464    | putative arginine repressor                                       | <b>0.08</b>  | 0.86289 |
| STM4464    | STM4464    | putative arginine repressor                                       | <b>1.19</b>  | 0.18052 |
| STM4465    | STM4465    | ornithine carbamoyltransferase                                    | <b>0.22</b>  | 0.72413 |
| STM4465    | STM4465    | ornithine carbamoyltransferase                                    | <b>0.74</b>  | 0.21393 |
| STM4466    | STM4466    | carbamate kinase                                                  | <b>0.28</b>  | 0.41715 |

|           |         |                                                                |              |         |
|-----------|---------|----------------------------------------------------------------|--------------|---------|
| STM4466   | STM4466 | carbamate kinase                                               | <b>0.55</b>  | 0.29930 |
| STM4467   | STM4467 | arginine deiminase                                             | <b>-0.07</b> | 0.91937 |
| STM4467   | STM4467 | arginine deiminase                                             | <b>0.58</b>  | 0.32481 |
| STM4468   | yjgK    | putative cytoplasmic protein                                   | <b>-0.22</b> | 0.70545 |
| STM4468   | yjgK    | putative cytoplasmic protein                                   | <b>0.40</b>  | 0.58387 |
| STM4469   | argI    | ornithine carbamoyltransferase                                 | <b>-0.82</b> | 0.34432 |
| STM4469   | argI    | ornithine carbamoyltransferase                                 | <b>0.02</b>  | 0.98124 |
| STM4470   | yjgD    | putative cytoplasmic protein                                   | <b>-0.51</b> | 0.27043 |
| STM4470   | yjgD    | putative cytoplasmic protein                                   | <b>0.18</b>  | 0.63003 |
| STM4471   | miaE    | hydroxylase                                                    | <b>-0.10</b> | 0.82428 |
| STM4471   | miaE    | hydroxylase                                                    | <b>0.09</b>  | 0.89130 |
| STM4472   | ytgA    | putative inner membrane protein                                | <b>-0.55</b> | 0.40820 |
| STM4472   | ytgA    | putative inner membrane protein                                | <b>-0.10</b> | 0.85718 |
| STM4473   | yjgM    | putative acetyltransferase                                     | <b>-0.34</b> | 0.40020 |
| STM4473   | yjgM    | putative acetyltransferase                                     | <b>-0.05</b> | 0.94453 |
| STM4474   | yjgN    | putative inner membrane protein                                | <b>-0.27</b> | 0.48447 |
| STM4474   | yjgN    | putative inner membrane protein                                | <b>0.07</b>  | 0.89979 |
| STM4475   | valS    | valyl-tRNA synthetase                                          | <b>-0.15</b> | 0.77801 |
| STM4475   | valS    | valyl-tRNA synthetase                                          | <b>0.08</b>  | 0.90797 |
| STM4476,S | holC    | DNA polymerase III subunit chi                                 | <b>0.01</b>  | 0.98790 |
| STM4476,S | holC    | DNA polymerase III subunit chi                                 | <b>-0.04</b> | 0.96107 |
| STM4477   | pepA    | leucyl aminopeptidase                                          | <b>0.00</b>  | 0.99882 |
| STM4477   | pepA    | leucyl aminopeptidase                                          | <b>0.07</b>  | 0.88813 |
| STM4479   | yjgP    | putative permease                                              | <b>-0.18</b> | 0.65271 |
| STM4479   | yjgP    | putative permease                                              | <b>-0.08</b> | 0.86839 |
| STM4480   | yjgQ    | putative permease                                              | <b>-0.28</b> | 0.46464 |
| STM4480   | yjgQ    | putative permease                                              | <b>-0.33</b> | 0.55403 |
| STM4481   | idnR    | L-idonate regulator                                            | <b>0.00</b>  | 0.99729 |
| STM4481   | idnR    | L-idonate regulator                                            | <b>0.43</b>  | 0.42811 |
| STM4482   | idnT    | L-idonate transport protein                                    | <b>-0.34</b> | 0.55008 |
| STM4482   | idnT    | L-idonate transport protein                                    | <b>0.34</b>  | 0.54656 |
| STM4483   | idnO    | gluconate 5-dehydrogenase                                      | <b>-0.68</b> | 0.17139 |
| STM4483   | idnO    | gluconate 5-dehydrogenase                                      | <b>0.09</b>  | 0.88647 |
| STM4484   | idnD    | L-idonate 5-dehydrogenase                                      | <b>-0.30</b> | 0.65549 |
| STM4484   | idnD    | L-idonate 5-dehydrogenase                                      | <b>0.86</b>  | 0.11913 |
| STM4485   | idnK    | thermosensitive D-gluconate kinase                             | <b>0.11</b>  | 0.88339 |
| STM4485   | idnK    | thermosensitive D-gluconate kinase                             | <b>0.07</b>  | 0.93485 |
| STM4486   | yjgB    | putative alcohol dehydrogenase                                 | <b>-0.06</b> | 0.91653 |
| STM4486   | yjgB    | putative alcohol dehydrogenase                                 | <b>0.29</b>  | 0.74872 |
| STM4487   | leuX    | STM4487                                                        | <b>-0.34</b> | 0.38276 |
| STM4487   | leuX    | STM4487                                                        | <b>0.33</b>  | 0.37342 |
| STM4488   | STM4488 | putative integrase                                             | <b>-0.26</b> | 0.53678 |
| STM4488   | STM4488 | putative integrase                                             | <b>0.84</b>  | 0.21747 |
| STM4489   | STM4489 | putative DNA helicases                                         | <b>-0.09</b> | 0.83524 |
| STM4489   | STM4489 | putative DNA helicases                                         | <b>0.08</b>  | 0.90733 |
| STM4490   | STM4490 | putative restriction endonuclease                              | <b>0.02</b>  | 0.96785 |
| STM4490   | STM4490 | putative restriction endonuclease                              | <b>0.31</b>  | 0.55976 |
| STM4491   | STM4491 | putative ATP-dependent Lon protease                            | <b>-0.30</b> | 0.57419 |
| STM4491   | STM4491 | putative ATP-dependent Lon protease                            | <b>-0.29</b> | 0.54461 |
| STM4492   | STM4492 | putative cytoplasmic protein                                   | <b>-0.02</b> | 0.97095 |
| STM4492   | STM4492 | putative cytoplasmic protein                                   | <b>-0.18</b> | 0.73093 |
| STM4493   | STM4493 | putative cytoplasmic protein                                   | <b>0.24</b>  | 0.64185 |
| STM4493   | STM4493 | putative cytoplasmic protein                                   | <b>0.33</b>  | 0.41391 |
| STM4494   | STM4494 | putative ABC-type sugar/spermidine/putrescine transport system | <b>-0.09</b> | 0.82192 |
| STM4494   | STM4494 | putative ABC-type sugar/spermidine/putrescine transport system | <b>0.09</b>  | 0.87512 |
| STM4495   | STM4495 | putative type II restriction enzyme methylase subunit          | <b>-0.03</b> | 0.96317 |
| STM4495   | STM4495 | putative type II restriction enzyme methylase subunit          | <b>0.08</b>  | 0.87078 |
| STM4496   | STM4496 | putative DNA repair ATPase                                     | <b>-0.28</b> | 0.52334 |
| STM4496   | STM4496 | putative DNA repair ATPase                                     | <b>0.14</b>  | 0.81075 |
| STM4497   | STM4497 | putative cytoplasmic protein                                   | <b>0.17</b>  | 0.76240 |
| STM4497   | STM4497 | putative cytoplasmic protein                                   | <b>0.02</b>  | 0.96851 |

|            |            |                                               |              |         |
|------------|------------|-----------------------------------------------|--------------|---------|
| STM4498    | STM4498    | putative inner membrane protein               | <b>0.34</b>  | 0.38351 |
| STM4498    | STM4498    | putative inner membrane protein               | <b>0.25</b>  | 0.52861 |
| STM4499    | yeeN       | hypothetical protein STM4499                  | <b>-0.22</b> | 0.65854 |
| STM4499    | yeeN       | hypothetical protein STM4499                  | <b>-0.15</b> | 0.72375 |
| STM4500    | yjhP       | putative SAM-dependent methyltransferase      | <b>-0.76</b> | 0.23999 |
| STM4500    | yjhP       | putative SAM-dependent methyltransferase      | <b>0.01</b>  | 0.99417 |
| STM4501    | STM4501    | putative cytoplasmic protein                  | <b>-0.52</b> | 0.29562 |
| STM4501    | STM4501    | putative cytoplasmic protein                  | <b>-0.12</b> | 0.81862 |
| STM4502    | STM4502    | putative cytoplasmic protein                  | <b>-0.26</b> | 0.72120 |
| STM4502    | STM4502    | putative cytoplasmic protein                  | <b>0.09</b>  | 0.85766 |
| STM4503    | STM4503    | putative inner membrane protein               | <b>0.37</b>  | 0.41812 |
| STM4503    | STM4503    | putative inner membrane protein               | <b>1.08</b>  | 0.11913 |
| STM4504    | STM4504    | putative cytoplasmic protein                  | <b>-0.25</b> | 0.66218 |
| STM4504    | STM4504    | putative cytoplasmic protein                  | <b>-1.44</b> | 0.51300 |
| STM4505    | STM4505    | hypothetical protein STM4505                  | <b>-0.62</b> | 0.26261 |
| STM4505    | STM4505    | hypothetical protein STM4505                  | <b>0.09</b>  | 0.89675 |
| STM4506    | STM4506    | putative diene lactone hydrolase              | <b>-0.18</b> | 0.77847 |
| STM4506    | STM4506    | putative diene lactone hydrolase              | <b>-0.06</b> | 0.94811 |
| STM4507    | uxuR       | uxu operon transcriptional repressor          | <b>0.45</b>  | 0.23853 |
| STM4507    | uxuR       | uxu operon transcriptional repressor          | <b>0.80</b>  | 0.17139 |
| STM4508    | trpS2      | tryptophanyl-tRNA synthetase                  | <b>-0.76</b> | 0.19236 |
| STM4508    | trpS2      | tryptophanyl-tRNA synthetase                  | <b>-0.14</b> | 0.72143 |
| STM4508,1N | STM4508,1N | hypothetical protein STM4508,1N               | <b>-0.06</b> | 0.94567 |
| STM4508,1N | STM4508,1N | hypothetical protein STM4508,1N               | <b>-0.17</b> | 0.82518 |
| STM4509,S  | STM4509,S  | putative cytoplasmic protein                  | <b>0.25</b>  | 0.81325 |
| STM4509,S  | STM4509,S  | putative cytoplasmic protein                  | <b>0.55</b>  | 0.40008 |
| STM4510    | STM4510    | putative aspartate racemase                   | <b>-0.62</b> | 0.21015 |
| STM4510    | STM4510    | putative aspartate racemase                   | <b>0.55</b>  | 0.25895 |
| STM4511    | yjiE       | putative transcriptional regulator            | <b>-0.49</b> | 0.39260 |
| STM4511    | yjiE       | putative transcriptional regulator            | <b>1.01</b>  | 0.31280 |
| STM4512    | iadA       | isoaspartyl dipeptidase                       | <b>-0.44</b> | 0.46720 |
| STM4512    | iadA       | isoaspartyl dipeptidase                       | <b>0.48</b>  | 0.34553 |
| STM4513    | yjiG       | putative permease                             | <b>-0.09</b> | 0.83497 |
| STM4513    | yjiG       | putative permease                             | <b>0.18</b>  | 0.70966 |
| STM4514,S  | yjiH       | putative inner membrane protein               | <b>-0.42</b> | 0.61811 |
| STM4514,S  | yjiH       | putative inner membrane protein               | <b>0.10</b>  | 0.85378 |
| STM4515    | yjiJ       | putative sugar transporter                    | <b>-0.48</b> | 0.25460 |
| STM4515    | yjiJ       | putative sugar transporter                    | <b>-0.09</b> | 0.89212 |
| STM4516    | yjiN       | putative inner membrane protein               | <b>0.71</b>  | 0.29796 |
| STM4516    | yjiN       | putative inner membrane protein               | <b>1.29</b>  | 0.08647 |
| STM4517    | yjiO       | putative transport protein                    | <b>0.08</b>  | 0.90462 |
| STM4517    | yjiO       | putative transport protein                    | <b>-0.13</b> | 0.83103 |
| STM4518    | STM4518    | putative inner membrane protein               | <b>0.17</b>  | 0.89811 |
| STM4518    | STM4518    | putative inner membrane protein               | <b>0.85</b>  | 0.30956 |
| STM4519    | STM4519    | putative NAD-dependent aldehyde dehydrogenase | <b>-0.06</b> | 0.93367 |
| STM4519    | STM4519    | putative NAD-dependent aldehyde dehydrogenase | <b>-0.04</b> | 0.94050 |
| STM4522    | STM4522    | putative inner membrane protein               | <b>-0.82</b> | 0.21067 |
| STM4522    | STM4522    | putative inner membrane protein               | <b>-0.20</b> | 0.81763 |
| STM4523    | yjiW       | putative SOS response protein                 | <b>-0.31</b> | 0.36543 |
| STM4523    | yjiW       | putative SOS response protein                 | <b>0.52</b>  | 0.40947 |
| STM4524    | hsdS       | type I restriction enzyme specificity protein | <b>-0.14</b> | 0.79233 |
| STM4524    | hsdS       | type I restriction enzyme specificity protein | <b>0.23</b>  | 0.69189 |
| STM4525    | hsdM       | DNA methylase M                               | <b>-0.41</b> | 0.35014 |
| STM4525    | hsdM       | DNA methylase M                               | <b>-0.18</b> | 0.74583 |
| STM4526    | hsdR       | endonuclease R                                | <b>-0.21</b> | 0.61335 |
| STM4526    | hsdR       | endonuclease R                                | <b>0.57</b>  | 0.26213 |
| STM4527    | mrr        | restriction endonuclease                      | <b>-0.43</b> | 0.27312 |
| STM4527    | mrr        | restriction endonuclease                      | <b>0.45</b>  | 0.38596 |
| STM4528    | STM4528    | putative inner membrane protein               | <b>-0.23</b> | 0.64371 |
| STM4528    | STM4528    | putative inner membrane protein               | <b>0.64</b>  | 0.41024 |
| STM4529    | STM4529    | putative cytoplasmic protein                  | <b>-0.58</b> | 0.23892 |
| STM4529    | STM4529    | putative cytoplasmic protein                  | <b>0.06</b>  | 0.93023 |
| STM4530    | yjiA       | putative cobalamin biosynthetic protein       | <b>0.91</b>  | 0.56913 |

|           |           |                                                |              |         |
|-----------|-----------|------------------------------------------------|--------------|---------|
| STM4530   | yjiA      | putative cobalamin biosynthetic protein        | <b>-0.14</b> | 0.94470 |
| STM4531   | yjiX      | putative cytoplasmic protein                   | <b>-0.20</b> | 0.77967 |
| STM4531   | yjiX      | putative cytoplasmic protein                   | <b>0.24</b>  | 0.65730 |
| STM4532   | yjiY      | putative carbon starvation protein             | <b>0.12</b>  | 0.87727 |
| STM4532   | yjiY      | putative carbon starvation protein             | <b>0.54</b>  | 0.18622 |
| STM4533   | tsr       | methyl-accepting chemotaxis protein I          | <b>-0.48</b> | 0.21015 |
| STM4533   | tsr       | methyl-accepting chemotaxis protein I          | <b>0.06</b>  | 0.93033 |
| STM4534   | STM4534   | putative transcriptional regulator             | <b>-0.27</b> | 0.69963 |
| STM4534   | STM4534   | putative transcriptional regulator             | <b>0.20</b>  | 0.81929 |
| STM4535   | STM4535   | putative PTS permease                          | <b>-0.03</b> | 0.96850 |
| STM4535   | STM4535   | putative PTS permease                          | <b>-0.32</b> | 0.65730 |
| STM4536   | STM4536   | putative PTS permease                          | <b>0.07</b>  | 0.94675 |
| STM4536   | STM4536   | putative PTS permease                          | <b>1.37</b>  | 0.22049 |
| STM4537   | STM4537   | putative PTS permease                          | <b>0.01</b>  | 0.98658 |
| STM4537   | STM4537   | putative PTS permease                          | <b>0.83</b>  | 0.30560 |
| STM4538   | STM4538   | putative PTS permease                          | <b>-0.94</b> | 0.13206 |
| STM4538   | STM4538   | putative PTS permease                          | <b>-0.02</b> | 0.97513 |
|           |           | putative glucosamine-fructose-6-phosphate      |              |         |
| STM4539   | STM4539   | aminotransferase                               | <b>-0.40</b> | 0.35788 |
|           |           | putative glucosamine-fructose-6-phosphate      |              |         |
| STM4539   | STM4539   | aminotransferase                               | <b>0.08</b>  | 0.87655 |
|           |           | putative glucosamine-fructose-6-phosphate      |              |         |
| STM4540,S | STM4540,S | aminotransferase                               | <b>-0.81</b> | 0.10754 |
|           |           | putative glucosamine-fructose-6-phosphate      |              |         |
| STM4540,S | STM4540,S | aminotransferase                               | <b>-0.58</b> | 0.19967 |
| STM4541   | mdoB      | phosphoglycerol transferase I                  | <b>-1.72</b> | 0.01174 |
| STM4541   | mdoB      | phosphoglycerol transferase I                  | <b>-0.86</b> | 0.15276 |
| STM4542   | yjjA      | putative outer membrane protein                | <b>-0.19</b> | 0.65228 |
| STM4542   | yjjA      | putative outer membrane protein                | <b>-0.10</b> | 0.79442 |
| STM4543   | dnaC      | DNA replication protein DnaC                   | <b>-0.60</b> | 0.37154 |
| STM4543   | dnaC      | DNA replication protein DnaC                   | <b>0.28</b>  | 0.59704 |
| STM4544   | dnaT      | primosomal protein I                           | <b>-0.27</b> | 0.45069 |
| STM4544   | dnaT      | primosomal protein I                           | <b>0.19</b>  | 0.76184 |
| STM4545   | STM4545   | putative inner membrane protein                | <b>-0.24</b> | 0.58934 |
| STM4545   | STM4545   | putative inner membrane protein                | <b>-0.19</b> | 0.78846 |
| STM4546   | yjjP      | hypothetical protein STM4546                   | <b>-0.31</b> | 0.46199 |
| STM4546   | yjjP      | hypothetical protein STM4546                   | <b>-0.18</b> | 0.73690 |
| STM4547   | yjjQ      | putative transcriptional regulator             | <b>-0.87</b> | 0.25964 |
| STM4547   | yjjQ      | putative transcriptional regulator             | <b>-0.27</b> | 0.67012 |
| STM4548   | bglJ      | bgl operon transcriptional activator           | <b>-0.08</b> | 0.87496 |
| STM4548   | bglJ      | bgl operon transcriptional activator           | <b>-0.05</b> | 0.94765 |
| STM4549   | STM4549   | putative cytoplasmic protein                   | <b>-0.50</b> | 0.20922 |
| STM4549   | STM4549   | putative cytoplasmic protein                   | <b>0.01</b>  | 0.98894 |
| STM4550   | fhuF      | ferric hydroxamate transport protein           | <b>-0.08</b> | 0.85257 |
| STM4550   | fhuF      | ferric hydroxamate transport protein           | <b>0.41</b>  | 0.34201 |
| STM4551   | STM4551   | hypothetical protein STM4551                   | <b>-0.38</b> | 0.52765 |
| STM4551   | STM4551   | hypothetical protein STM4551                   | <b>-0.06</b> | 0.94450 |
| STM4552   | STM4552   | putative inner membrane protein                | <b>-0.43</b> | 0.39069 |
| STM4552   | STM4552   | putative inner membrane protein                | <b>0.19</b>  | 0.73653 |
| STM4556   | rsmC      | 16S ribosomal RNA m2G1207 methyltransferase    | <b>-0.35</b> | 0.47844 |
| STM4556   | rsmC      | 16S ribosomal RNA m2G1207 methyltransferase    | <b>-0.11</b> | 0.79275 |
| STM4558   | rimI      | ribosomal-protein-alanine N-acetyltransferase  | <b>-0.01</b> | 0.98539 |
| STM4558   | rimI      | ribosomal-protein-alanine N-acetyltransferase  | <b>0.34</b>  | 0.36311 |
| STM4559,S | yjjG      | nucleotidase                                   | <b>0.12</b>  | 0.80637 |
| STM4559,S | yjjG      | nucleotidase                                   | <b>0.16</b>  | 0.73473 |
| STM4560   | prfC      | peptide chain release factor 3                 | <b>-0.25</b> | 0.58613 |
| STM4560   | prfC      | peptide chain release factor 3                 | <b>0.01</b>  | 0.98551 |
| STM4561   | osmY      | hyperosmotically-inducible periplasmic protein | <b>-0.20</b> | 0.63380 |
| STM4561   | osmY      | hyperosmotically-inducible periplasmic protein | <b>0.24</b>  | 0.63196 |
| STM4562   | STM4562   | putative inner membrane protein                | <b>0.05</b>  | 0.92506 |
| STM4562   | STM4562   | putative inner membrane protein                | <b>0.35</b>  | 0.35755 |
| STM4563   | yjjU      | putative phosphoesterase                       | <b>-0.11</b> | 0.85174 |
| STM4563   | yjjU      | putative phosphoesterase                       | <b>-0.01</b> | 0.99260 |

|           |         |                                             |              |         |
|-----------|---------|---------------------------------------------|--------------|---------|
| STM4564   | yjjV    | putative hydrolase                          | <b>0.04</b>  | 0.97219 |
| STM4564   | yjjV    | putative hydrolase                          | <b>0.04</b>  | 0.95380 |
| STM4565   | yjjW    | pyruvate formate lyase-activating enzyme    | <b>-0.09</b> | 0.83414 |
| STM4565   | yjjW    | pyruvate formate lyase-activating enzyme    | <b>0.76</b>  | 0.17085 |
| STM4566   | yjjI    | putative cytoplasmic protein                | <b>-0.80</b> | 0.12889 |
| STM4566   | yjjI    | putative cytoplasmic protein                | <b>-0.07</b> | 0.88977 |
| STM4567   | deoC    | deoxyribose-phosphate aldolase              | <b>0.34</b>  | 0.57827 |
| STM4567   | deoC    | deoxyribose-phosphate aldolase              | <b>0.34</b>  | 0.56129 |
| STM4568   | deoA    | thymidine phosphorylase                     | <b>0.34</b>  | 0.41676 |
| STM4568   | deoA    | thymidine phosphorylase                     | <b>0.38</b>  | 0.37342 |
| STM4569   | deoB    | phosphopentomutase                          | <b>-0.17</b> | 0.67121 |
| STM4569   | deoB    | phosphopentomutase                          | <b>0.09</b>  | 0.87019 |
| STM4570   | deoD    | purine nucleoside phosphorylase             | <b>-0.64</b> | 0.15276 |
| STM4570   | deoD    | purine nucleoside phosphorylase             | <b>-0.46</b> | 0.29664 |
| STM4571   | STM4571 | putative outer membrane protein             | <b>-0.10</b> | 0.87078 |
| STM4571   | STM4571 | putative outer membrane protein             | <b>-0.02</b> | 0.97776 |
| STM4572   | stjB    | putative fimbrial usher protein             | <b>-0.52</b> | 0.39186 |
| STM4572   | stjB    | putative fimbrial usher protein             | <b>0.02</b>  | 0.96850 |
| STM4573   | stjC    | putative fimbrial chaperone                 | <b>-0.09</b> | 0.91456 |
| STM4573   | stjC    | putative fimbrial chaperone                 | <b>-0.15</b> | 0.87909 |
| STM4574   | STM4574 | putative outer membrane protein             | <b>-0.17</b> | 0.79816 |
| STM4574   | STM4574 | putative outer membrane protein             | <b>0.14</b>  | 0.77148 |
| STM4575   | STM4575 | putative outer membrane protein             | <b>-0.31</b> | 0.53124 |
| STM4575   | STM4575 | putative outer membrane protein             | <b>-0.04</b> | 0.94527 |
| STM4576   | lplA    | lipoate-protein ligase A                    | <b>-0.86</b> | 0.19142 |
| STM4576   | lplA    | lipoate-protein ligase A                    | <b>-0.24</b> | 0.73415 |
| STM4577   | smp     | hypothetical protein STM4577                | <b>0.04</b>  | 0.93410 |
| STM4577   | smp     | hypothetical protein STM4577                | <b>0.37</b>  | 0.53655 |
| STM4578   | serB    | 3-phosphoserine phosphatase                 | <b>-0.18</b> | 0.79056 |
| STM4578   | serB    | 3-phosphoserine phosphatase                 | <b>0.24</b>  | 0.53840 |
| STM4579   | radA    | putative ATP-dependent protease             | <b>-0.01</b> | 0.98718 |
| STM4579   | radA    | putative ATP-dependent protease             | <b>0.09</b>  | 0.86102 |
| STM4580,S | nadR    | nicotinamide-nucleotide adenylyltransferase | <b>-0.24</b> | 0.55956 |
| STM4580,S | nadR    | nicotinamide-nucleotide adenylyltransferase | <b>0.01</b>  | 0.98855 |
| STM4581   | yjjK    | putative transport protein                  | <b>-0.35</b> | 0.34812 |
| STM4581   | yjjK    | putative transport protein                  | <b>0.32</b>  | 0.46629 |
| STM4582   | slt     | soluble lytic murein transglycosylase       | <b>0.07</b>  | 0.91917 |
| STM4582   | slt     | soluble lytic murein transglycosylase       | <b>0.20</b>  | 0.69882 |
| STM4583   | trpR    | Trp operon repressor                        | <b>-0.59</b> | 0.22540 |
| STM4583   | trpR    | Trp operon repressor                        | <b>-0.43</b> | 0.26910 |
| STM4584   | yjjX    | hypothetical protein STM4584                | <b>0.13</b>  | 0.75017 |
| STM4584   | yjjX    | hypothetical protein STM4584                | <b>0.12</b>  | 0.79180 |
| STM4585   | gpmB    | phosphoglycerate mutase                     | <b>-0.05</b> | 0.91170 |
| STM4585   | gpmB    | phosphoglycerate mutase                     | <b>0.25</b>  | 0.47844 |
| STM4586   | rob     | transcriptional regulator                   | <b>0.20</b>  | 0.62827 |
| STM4586   | rob     | transcriptional regulator                   | <b>-0.03</b> | 0.95059 |
| STM4587   | creA    | putative periplasmic protein                | <b>0.03</b>  | 0.96278 |
| STM4587   | creA    | putative periplasmic protein                | <b>0.15</b>  | 0.75190 |
| STM4588   | creB    | response regulator                          | <b>-0.20</b> | 0.65353 |
| STM4588   | creB    | response regulator                          | <b>0.38</b>  | 0.39302 |
| STM4589   | creC    | sensor kinase                               | <b>0.12</b>  | 0.79308 |
| STM4589   | creC    | sensor kinase                               | <b>0.56</b>  | 0.32016 |
| STM4590   | creD    | colicin E2 tolerance protein                | <b>-1.01</b> | 0.18710 |
| STM4590   | creD    | colicin E2 tolerance protein                | <b>-0.25</b> | 0.64330 |
| STM4591   | sthE    | putative major fimbrial subunit             | <b>-0.06</b> | 0.95318 |
| STM4591   | sthE    | putative major fimbrial subunit             | <b>-0.23</b> | 0.65709 |
| STM4592   | sthD    | putative fimbrial subunit                   | <b>-0.31</b> | 0.56303 |
| STM4592   | sthD    | putative fimbrial subunit                   | <b>0.00</b>  | 0.99997 |
| STM4593   | sthB    | putative fimbrial usher protein             | <b>-0.82</b> | 0.11913 |
| STM4593   | sthB    | putative fimbrial usher protein             | <b>-0.27</b> | 0.68537 |
| STM4594   | sthA    | putative fimbrial chaperone                 | <b>-0.31</b> | 0.63777 |
| STM4594   | sthA    | putative fimbrial chaperone                 | <b>0.36</b>  | 0.36304 |
| STM4595   | STM4595 | putative fimbrial chaperone                 | <b>-0.13</b> | 0.80045 |

|            |            |                                                   |              |         |
|------------|------------|---------------------------------------------------|--------------|---------|
| STM4595    | STM4595    | putative fimbrial chaperone                       | <b>0.30</b>  | 0.70229 |
| STM4596    | STM4596    | putative inner membrane protein                   | <b>-0.32</b> | 0.49871 |
| STM4596    | STM4596    | putative inner membrane protein                   | <b>0.39</b>  | 0.48014 |
| STM4597    | STM4597    | putative periplasmic protein                      | <b>-0.34</b> | 0.36543 |
| STM4597    | STM4597    | putative periplasmic protein                      | <b>-0.39</b> | 0.36703 |
| STM4598    | arcA       | response regulator                                | <b>-0.22</b> | 0.56222 |
| STM4598    | arcA       | response regulator                                | <b>0.04</b>  | 0.92161 |
| STM4600    | lasT       | putative tRNA/tRNA methyltransferase              | <b>0.09</b>  | 0.87796 |
| STM4600    | lasT       | putative tRNA/tRNA methyltransferase              | <b>0.28</b>  | 0.45968 |
| PSLT001    | PSLT001    | putative cytoplasmic protein                      | <b>-0.09</b> | 0.83507 |
| PSLT001    | PSLT001    | putative cytoplasmic protein                      | <b>0.15</b>  | 0.70144 |
| PSLT002    | PSLT002    | putative phospholipase D                          | <b>-1.02</b> | 0.21198 |
| PSLT002    | PSLT002    | putative phospholipase D                          | <b>-0.38</b> | 0.51952 |
| PSLT006    | repA       | DNA replication protein                           | <b>-0.33</b> | 0.43439 |
| PSLT006    | repA       | DNA replication protein                           | <b>0.48</b>  | 0.32760 |
| PSLT008    | srgC       | putative regulatory protein                       | <b>-0.68</b> | 0.22602 |
| PSLT008    | srgC       | putative regulatory protein                       | <b>-0.02</b> | 0.96797 |
| PSLT009    | rcK        | resistance to complement killing                  | <b>-0.17</b> | 0.62988 |
| PSLT009    | rcK        | resistance to complement killing                  | <b>0.01</b>  | 0.98355 |
| PSLT010    | srgB       | putative outer membrane protein                   | <b>-0.83</b> | 0.56654 |
| PSLT010    | srgB       | putative outer membrane protein                   | <b>0.27</b>  | 0.81830 |
| PSLT010    | srgB       | putative outer membrane protein                   | <b>0.69</b>  | 0.34051 |
| PSLT010    | srgB       | putative outer membrane protein                   | <b>0.85</b>  | 0.33465 |
| PSLT011    | srgA       | putative thiol-disulfide isomerase or thioredoxin | <b>-0.48</b> | 0.62069 |
| PSLT011    | srgA       | putative thiol-disulfide isomerase or thioredoxin | <b>0.23</b>  | 0.58995 |
| PSLT012    | orf7       | putative bacterial regulatory protein             | <b>-0.59</b> | 0.36162 |
| PSLT012    | orf7       | putative bacterial regulatory protein             | <b>0.07</b>  | 0.89790 |
| PSLT013    | pefI       | regulator                                         | <b>-0.47</b> | 0.37454 |
| PSLT013    | pefI       | regulator                                         | <b>-0.03</b> | 0.96650 |
| PSLT014    | orf6       | putative outer membrane protein                   | <b>-0.29</b> | 0.72271 |
| PSLT014    | orf6       | putative outer membrane protein                   | <b>-0.06</b> | 0.91170 |
| PSLT015    | orf5       | putative outer membrane protein                   | <b>-0.21</b> | 0.86190 |
| PSLT015    | orf5       | putative outer membrane protein                   | <b>-0.46</b> | 0.40399 |
| PSLT016    | pefD       | chaperone                                         | <b>0.78</b>  | 0.22283 |
| PSLT016    | pefD       | chaperone                                         | <b>1.28</b>  | 0.22088 |
| PSLT017    | pefC       | usher protein                                     | <b>-0.21</b> | 0.56179 |
| PSLT017    | pefC       | usher protein                                     | <b>-0.53</b> | 0.42254 |
| PSLT018    | pefA       | major fimbrial subunit                            | <b>-1.19</b> | 0.11224 |
| PSLT018    | pefA       | major fimbrial subunit                            | <b>-0.21</b> | 0.66677 |
| PSLT019    | pefB       | regulatory protein                                | <b>-0.15</b> | 0.79313 |
| PSLT019    | pefB       | regulatory protein                                | <b>1.12</b>  | 0.13813 |
| PSLT023    | repA2      | DNA replication protein                           | <b>-0.73</b> | 0.15736 |
| PSLT023    | repA2      | DNA replication protein                           | <b>-0.15</b> | 0.72819 |
| PSLT025    | PSLT025    | putative cytoplasmic protein                      | <b>-0.20</b> | 0.79233 |
| PSLT025    | PSLT025    | putative cytoplasmic protein                      | <b>0.37</b>  | 0.44745 |
| PSLT026    | PSLT026    | putative periplasmic protein                      | <b>-0.64</b> | 0.35937 |
| PSLT026    | PSLT026    | putative periplasmic protein                      | <b>0.32</b>  | 0.76838 |
| PSLT027    | ccdA       | antidote                                          | <b>-0.19</b> | 0.74243 |
| PSLT027    | ccdA       | antidote                                          | <b>-0.08</b> | 0.91937 |
| PSLT028    | ccdB       | toxin                                             | <b>-0.80</b> | 0.19398 |
| PSLT028    | ccdB       | toxin                                             | <b>0.10</b>  | 0.80110 |
| PSLT029    | PSLT029    | putative cytoplasmic protein                      | <b>0.50</b>  | 0.31511 |
| PSLT029    | PSLT029    | putative cytoplasmic protein                      | <b>0.49</b>  | 0.32444 |
| PSLT030    | PSLT030    | putative cytoplasmic protein                      | <b>-0.55</b> | 0.27312 |
| PSLT030    | PSLT030    | putative cytoplasmic protein                      | <b>-0.08</b> | 0.86912 |
| PSLT031    | rsdB       | resolvase                                         | <b>-0.53</b> | 0.28861 |
| PSLT031    | rsdB       | resolvase                                         | <b>-0.24</b> | 0.55338 |
| PSLT032    | PSLT032    | putative diguanylate cyclase/phosphodiesterase    | <b>-0.43</b> | 0.38041 |
| PSLT032    | PSLT032    | putative diguanylate cyclase/phosphodiesterase    | <b>0.26</b>  | 0.56569 |
| PSLT032,1N | PSLT032,1N | hypothetical protein PSLT032,1N                   | <b>-0.19</b> | 0.64664 |
| PSLT032,1N | PSLT032,1N | hypothetical protein PSLT032,1N                   | <b>-0.09</b> | 0.85210 |
| PSLT033    | PSLT033    | putative inner membrane protein                   | <b>0.49</b>  | 0.61341 |
| PSLT033    | PSLT033    | putative inner membrane protein                   | <b>0.27</b>  | 0.69184 |

|            |            |                                         |              |         |
|------------|------------|-----------------------------------------|--------------|---------|
| PSLT036    | PSLT036    | putative transposase                    | <b>-0.64</b> | 0.34201 |
| PSLT036    | PSLT036    | putative transposase                    | <b>0.94</b>  | 0.21078 |
| PSLT037    | spvD       | hydrophilic protein                     | <b>-1.02</b> | 0.17431 |
| PSLT037    | spvD       | hydrophilic protein                     | <b>-0.24</b> | 0.77974 |
| PSLT038    | spvC       | hydrophilic protein                     | <b>-0.41</b> | 0.57950 |
| PSLT038    | spvC       | hydrophilic protein                     | <b>1.12</b>  | 0.13645 |
| PSLT039    | spvB       | hydrophilic protein                     | <b>-0.51</b> | 0.51052 |
| PSLT039    | spvB       | hydrophilic protein                     | <b>0.37</b>  | 0.48386 |
| PSLT040    | spvA       | outer membrane protein                  | <b>-0.52</b> | 0.30956 |
| PSLT040    | spvA       | outer membrane protein                  | <b>-0.06</b> | 0.91170 |
| PSLT041    | spvR       | regulator of spv operon                 | <b>-1.07</b> | 0.30334 |
| PSLT041    | spvR       | regulator of spv operon                 | <b>-0.11</b> | 0.81896 |
| PSLT042    | PSLT042    | putative integrase protein              | <b>-1.00</b> | 0.11690 |
| PSLT042    | PSLT042    | putative integrase protein              | <b>-0.77</b> | 0.21951 |
| PSLT043    | PSLT043    | type II secretion system protein        | <b>-0.33</b> | 0.38363 |
| PSLT043    | PSLT043    | type II secretion system protein        | <b>0.18</b>  | 0.79629 |
| PSLT044    | rlgA       | putative integrase protein              | <b>-0.50</b> | 0.39186 |
| PSLT044    | rlgA       | putative integrase protein              | <b>-0.29</b> | 0.55403 |
| PSLT045    | PSLT045    | putative resolvase                      | <b>-0.50</b> | 0.24811 |
| PSLT045    | PSLT045    | putative resolvase                      | <b>-0.48</b> | 0.29912 |
| PSLT046    | PSLT046    | putative carbonic anhydrase             | <b>-1.81</b> | 0.02667 |
| PSLT046    | PSLT046    | putative carbonic anhydrase             | <b>-1.54</b> | 0.05896 |
| PSLT047    | PSLT047    | putative cytoplasmic protein            | <b>-0.58</b> | 0.27522 |
| PSLT047    | PSLT047    | putative cytoplasmic protein            | <b>0.02</b>  | 0.97720 |
| PSLT048    | tlpA       | alpha-helical coiled-coil protein       | <b>-0.47</b> | 0.22788 |
| PSLT048    | tlpA       | alpha-helical coiled-coil protein       | <b>0.40</b>  | 0.47484 |
| PSLT050,1N | PSLT050,1N | hypothetical protein PSLT050,1N         | <b>-0.79</b> | 0.36701 |
| PSLT050,1N | PSLT050,1N | hypothetical protein PSLT050,1N         | <b>-0.31</b> | 0.52712 |
| PSLT050,2N | PSLT050,2N | hypothetical protein PSLT050,2N         | <b>-0.02</b> | 0.97590 |
| PSLT050,2N | PSLT050,2N | hypothetical protein PSLT050,2N         | <b>-0.24</b> | 0.49336 |
| PSLT051    | PSLT051    | putative cytoplasmic protein            | <b>-0.79</b> | 0.16063 |
| PSLT051    | PSLT051    | putative cytoplasmic protein            | <b>-0.08</b> | 0.85918 |
| PSLT052    | parA       | plasmid partition protein A             | <b>-0.01</b> | 0.99446 |
| PSLT052    | parA       | plasmid partition protein A             | <b>0.31</b>  | 0.49811 |
| PSLT053    | parB       | plasmid partition protein B             | <b>0.28</b>  | 0.62403 |
| PSLT053    | parB       | plasmid partition protein B             | <b>0.19</b>  | 0.75730 |
| PSLT054    | samB       | DNA polymerase IV                       | <b>-0.64</b> | 0.22540 |
| PSLT054    | samB       | DNA polymerase IV                       | <b>0.11</b>  | 0.78399 |
| PSLT055    | samA       | SamA                                    | <b>-0.35</b> | 0.48021 |
| PSLT055    | samA       | SamA                                    | <b>0.81</b>  | 0.29912 |
| PSLT056    | PSLT056    | putative cytoplasmic protein            | <b>-0.36</b> | 0.38668 |
| PSLT056    | PSLT056    | putative cytoplasmic protein            | <b>0.15</b>  | 0.78067 |
| PSLT057    | PSLT057    | putative cytoplasmic protein            | <b>-0.16</b> | 0.65281 |
| PSLT057    | PSLT057    | putative cytoplasmic protein            | <b>0.62</b>  | 0.40431 |
| PSLT059    | PSLT059    | putative adenine-specific DNA methylase | <b>-0.25</b> | 0.75294 |
| PSLT059    | PSLT059    | putative adenine-specific DNA methylase | <b>0.11</b>  | 0.82756 |
| PSLT060    | PSLT060    | putative cytoplasmic protein            | <b>-0.10</b> | 0.82428 |
| PSLT060    | PSLT060    | putative cytoplasmic protein            | <b>0.55</b>  | 0.60427 |
| PSLT060,1N | PSLT060,1N | hypothetical protein PSLT060,1N         | <b>-0.31</b> | 0.52511 |
| PSLT060,1N | PSLT060,1N | hypothetical protein PSLT060,1N         | <b>0.32</b>  | 0.42312 |
| PSLT061    | PSLT061    | putative inner membrane protein         | <b>-0.38</b> | 0.33651 |
| PSLT061    | PSLT061    | putative inner membrane protein         | <b>0.36</b>  | 0.41774 |
| PSLT062    | PSLT062    | putative cytoplasmic protein            | <b>-1.65</b> | 0.14030 |
| PSLT062    | PSLT062    | putative cytoplasmic protein            | <b>-0.59</b> | 0.26254 |
| PSLT063    | PSLT063    | putative cytoplasmic protein            | <b>-0.12</b> | 0.87135 |
| PSLT063    | PSLT063    | putative cytoplasmic protein            | <b>0.30</b>  | 0.63101 |
| PSLT064    | PSLT064    | putative inner membrane protein         | <b>0.00</b>  | 0.99882 |
| PSLT064    | PSLT064    | putative inner membrane protein         | <b>0.65</b>  | 0.23114 |
| PSLT066    | ssbB       | single-strand DNA binding protein       | <b>0.08</b>  | 0.86947 |
| PSLT066    | ssbB       | single-strand DNA binding protein       | <b>0.63</b>  | 0.29537 |
| PSLT067    | PSLT067    | putative cytoplasmic protein            | <b>-0.87</b> | 0.28655 |
| PSLT067    | PSLT067    | putative cytoplasmic protein            | <b>0.01</b>  | 0.99268 |
| PSLT068    | PSLT068    | putative ParB-like nuclease             | <b>-0.26</b> | 0.82162 |

|            |            |                                                      |              |         |
|------------|------------|------------------------------------------------------|--------------|---------|
| PSLT068    | PSLT068    | putative ParB-like nuclease                          | <b>0.94</b>  | 0.19138 |
| PSLT069    | psiB       | PsiB                                                 | <b>-0.53</b> | 0.48386 |
| PSLT069    | psiB       | PsiB                                                 | <b>-1.85</b> | 0.60759 |
| PSLT070    | psiA       | PsiA                                                 | <b>0.34</b>  | 0.54217 |
| PSLT070    | psiA       | PsiA                                                 | <b>1.03</b>  | 0.15276 |
| PSLT072    | PSLT072    | putative transglycosylase                            | <b>-0.93</b> | 0.17765 |
| PSLT072    | PSLT072    | putative transglycosylase                            | <b>0.32</b>  | 0.51549 |
| PSLT073    | traM       | mating signal protein                                | <b>0.05</b>  | 0.95563 |
| PSLT073    | traM       | mating signal protein                                | <b>0.11</b>  | 0.87836 |
| PSLT075    | traJ       | regulatory protein                                   | <b>-0.08</b> | 0.93767 |
| PSLT075    | traJ       | regulatory protein                                   | <b>-0.21</b> | 0.72129 |
| PSLT076    | traY       | DNA-binding protein                                  | <b>-0.66</b> | 0.22540 |
| PSLT076    | traY       | DNA-binding protein                                  | <b>0.19</b>  | 0.86895 |
| PSLT077    | traA       | pilus subunit                                        | <b>-0.47</b> | 0.30806 |
| PSLT077    | traA       | pilus subunit                                        | <b>0.34</b>  | 0.71902 |
| PSLT078    | traL       | pilus assembly protein                               | <b>-1.02</b> | 0.18763 |
| PSLT078    | traL       | pilus assembly protein                               | <b>-0.46</b> | 0.51973 |
| PSLT079    | traE       | pilus assembly protein                               | <b>-0.04</b> | 0.92637 |
| PSLT079    | traE       | pilus assembly protein                               | <b>0.53</b>  | 0.44218 |
| PSLT080    | traK       | pilus assembly protein                               | <b>0.16</b>  | 0.87356 |
| PSLT080    | traK       | pilus assembly protein                               | <b>0.35</b>  | 0.35536 |
| PSLT081    | traB       | pilus assembly protein                               | <b>-0.52</b> | 0.33373 |
| PSLT081    | traB       | pilus assembly protein                               | <b>0.04</b>  | 0.94765 |
| PSLT082    | traP       | conjugative transfer protein                         | <b>-0.29</b> | 0.46199 |
| PSLT082    | traP       | conjugative transfer protein                         | <b>0.07</b>  | 0.88012 |
| PSLT083    | trbD       | conjugative transfer protein                         | <b>-0.41</b> | 0.43837 |
| PSLT083    | trbD       | conjugative transfer protein                         | <b>0.22</b>  | 0.64331 |
| PSLT084    | traV       | pilus assembly protein                               | <b>-0.66</b> | 0.19843 |
| PSLT084    | traV       | pilus assembly protein                               | <b>-0.09</b> | 0.87906 |
| PSLT085    | traR       | conjugative transfer protein                         | <b>-0.80</b> | 0.15859 |
| PSLT085    | traR       | conjugative transfer protein                         | <b>-0.27</b> | 0.62988 |
| PSLT087    | PSLT087    | OrfG2                                                | <b>-0.91</b> | 0.12727 |
| PSLT087    | PSLT087    | OrfG2                                                | <b>-0.33</b> | 0.52861 |
| PSLT088    | traC       | ATP-binding protein                                  | <b>-0.66</b> | 0.27496 |
| PSLT088    | traC       | ATP-binding protein                                  | <b>0.01</b>  | 0.98428 |
| PSLT089    | trbI       | pilus assembly protein                               | <b>0.35</b>  | 0.76407 |
| PSLT089    | trbI       | pilus assembly protein                               | <b>-0.11</b> | 0.78016 |
| PSLT091    | traW       | pilus assembly protein                               | <b>0.84</b>  | 0.66070 |
| PSLT091    | traW       | pilus assembly protein                               | <b>0.46</b>  | 0.53827 |
| PSLT092    | traU       | pilus assembly protein                               | <b>-0.12</b> | 0.74713 |
| PSLT092    | traU       | pilus assembly protein                               | <b>0.06</b>  | 0.89979 |
| PSLT094    | trbC       | pilus assembly protein                               | <b>-0.18</b> | 0.66893 |
| PSLT094    | trbC       | pilus assembly protein                               | <b>0.75</b>  | 0.20129 |
| PSLT094,1N | PSLT094,1N | hypothetical protein PSLT094,1N                      | <b>-0.63</b> | 0.28905 |
| PSLT094,1N | PSLT094,1N | hypothetical protein PSLT094,1N                      | <b>0.29</b>  | 0.51275 |
| PSLT095    | traN       | mating pair stabilization protein                    | <b>0.05</b>  | 0.92723 |
| PSLT095    | traN       | mating pair stabilization protein                    | <b>1.20</b>  | 0.27557 |
| PSLT097    | traF       | pilus assembly protein                               | <b>-0.74</b> | 0.15529 |
| PSLT097    | traF       | pilus assembly protein                               | <b>-0.24</b> | 0.58506 |
| PSLT098    | traQ       | pilin chaperone                                      | <b>-0.73</b> | 0.19142 |
| PSLT098    | traQ       | pilin chaperone                                      | <b>0.37</b>  | 0.36066 |
| PSLT099    | trbB       | conjugative transfer protein                         | <b>-0.97</b> | 0.15859 |
| PSLT099    | trbB       | conjugative transfer protein                         | <b>0.41</b>  | 0.31635 |
| PSLT100    | traH       | pilus assembly protein                               | <b>0.29</b>  | 0.67631 |
| PSLT100    | traH       | pilus assembly protein                               | <b>0.46</b>  | 0.45811 |
| PSLT101    | traG       | mating pair stabilization and pilus assembly protein | <b>-0.15</b> | 0.76075 |
| PSLT101    | traG       | mating pair stabilization and pilus assembly protein | <b>0.02</b>  | 0.96785 |
| PSLT102    | traS       | entry exclusion protein                              | <b>-0.20</b> | 0.72518 |
| PSLT102    | traS       | entry exclusion protein                              | <b>0.23</b>  | 0.53263 |
| PSLT103    | traT       | surface exclusion protein                            | <b>-0.78</b> | 0.27651 |
| PSLT103    | traT       | surface exclusion protein                            | <b>-0.22</b> | 0.61809 |
| PSLT104    | traD       | ATP-binding protein/DNA transporter                  | <b>-0.14</b> | 0.73473 |
| PSLT104    | traD       | ATP-binding protein/DNA transporter                  | <b>0.24</b>  | 0.57070 |

|         |         |                              |              |         |
|---------|---------|------------------------------|--------------|---------|
| PSLT105 | trbH    | conjugative transfer protein | <b>-0.83</b> | 0.28285 |
| PSLT105 | trbH    | conjugative transfer protein | <b>-0.35</b> | 0.62617 |
| PSLT106 | PSLT106 | MvpA-like protein            | <b>-0.36</b> | 0.46870 |
| PSLT106 | PSLT106 | MvpA-like protein            | <b>0.17</b>  | 0.64422 |
| PSLT107 | PSLT107 | putative cytoplasmic protein | <b>-0.34</b> | 0.42277 |
| PSLT107 | PSLT107 | putative cytoplasmic protein | <b>0.49</b>  | 0.49117 |
| PSLT108 | tral    | oriT nickase/helicase        | <b>-0.48</b> | 0.45188 |
| PSLT108 | tral    | oriT nickase/helicase        | <b>-0.11</b> | 0.82350 |
| PSLT110 | traX    | pilin subunit acetylation    | <b>0.18</b>  | 0.74889 |
| PSLT110 | traX    | pilin subunit acetylation    | <b>0.31</b>  | 0.61343 |
| PSLT111 | finO    | finP binding-protein         | <b>-0.14</b> | 0.74957 |
| PSLT111 | finO    | finP binding-protein         | <b>0.17</b>  | 0.65709 |

**Table S2.** Genome-wide expression of *Salmonella enterica* serovar Typhimurium inside fibroblasts

Intracellular WT 24 h p.i.      Intracellular *phoP* 24 h p.i.      Extracellular WT stationary phase

Relative to WT exponential LB      Relative to *phoP* exponential LB      Relative to WT exponential LB

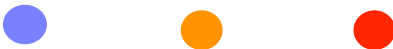

| Systematic name | Gene       | Product                                           | log2Ratio (M) | p value | log2Ratio (M) | p value | log2Ratio (M) | p value |
|-----------------|------------|---------------------------------------------------|---------------|---------|---------------|---------|---------------|---------|
| PSLT001         | PSLT001    | putative cytoplasmic protein                      | 1.20          | 0.17334 | 0.99          | 0.00620 | 1.07          | 0.01183 |
| PSLT001         | PSLT001    | putative cytoplasmic protein                      | 3.71          | 0.00541 | 1.03          | 0.01011 | 2.17          | 0.00286 |
| PSLT002         | PSLT002    | putative phospholipase D                          | 0.47          | 0.49160 | 0.95          | 0.01972 | -0.94         | 0.27630 |
| PSLT002         | PSLT002    | putative phospholipase D                          | 1.20          | 0.28598 | 1.13          | 0.01602 | 0.03          | 0.96184 |
| PSLT006         | repA       | DNA replication protein                           | 3.02          | 0.00660 | 2.15          | 0.00060 | 3.28          | 0.00030 |
| PSLT006         | repA       | DNA replication protein                           | 2.81          | 0.04089 | 1.13          | 0.01170 | 1.71          | 0.00234 |
| PSLT007         | -          | putative outer membrane protein                   | 2.18          | 0.19185 | -0.36         | 0.19276 | 0.27          | 0.72025 |
| PSLT007         | -          | putative outer membrane protein                   | 3.38          | 0.09362 | -0.93         | 0.06593 | 0.55          | 0.32803 |
| PSLT008         | srgC       | putative regulatory protein                       | 2.32          | 0.03113 | 1.30          | 0.00477 | 0.48          | 0.35423 |
| PSLT008         | srgC       | putative regulatory protein                       | 3.58          | 0.02831 | 1.29          | 0.00722 | 1.83          | 0.00193 |
| PSLT009         | rck        | resistance to complement killing                  | 1.68          | 0.08513 | 1.58          | 0.00134 | -0.02         | 0.97608 |
| PSLT009         | rck        | resistance to complement killing                  | 2.77          | 0.00581 | 1.29          | 0.00329 | 0.77          | 0.10007 |
| PSLT010         | srgB       | putative outer membrane protein                   | 0.65          | 0.57569 | 0.22          | 0.53304 | -0.19         | 0.85064 |
| PSLT010         | srgB       | putative outer membrane protein                   | 3.62          | 0.02818 | -0.49         | 0.17868 | 1.95          | 0.02013 |
| PSLT011         | srgA       | putative thiol-disulfide isomerase or thioredoxin | 1.36          | 0.16559 | 1.39          | 0.00387 | 1.86          | 0.01320 |
| PSLT011         | srgA       | putative thiol-disulfide isomerase or thioredoxin | 3.46          | 0.00595 | 1.28          | 0.00995 | 2.71          | 0.00815 |
| PSLT012         | orf7       | putative bacterial regulatory protein             | 0.38          | 0.47153 | 1.58          | 0.00543 | -0.67         | 0.17075 |
| PSLT012         | orf7       | putative bacterial regulatory protein             | 0.92          | 0.06678 | 1.31          | 0.00291 | -0.63         | 0.09756 |
| PSLT013         | pefI       | regulator                                         | 0.77          | 0.16257 | 1.84          | 0.00070 | -0.63         | 0.24091 |
| PSLT013         | pefI       | regulator                                         | 3.00          | 0.00546 | 1.69          | 0.00075 | -0.06         | 0.91926 |
| PSLT014         | orf6       | putative outer membrane protein                   | -0.04         | 0.96378 | 2.13          | 0.00177 | 0.53          | 0.47040 |
| PSLT014         | orf6       | putative outer membrane protein                   | 0.84          | 0.19442 | 2.28          | 0.00024 | 0.10          | 0.82181 |
| PSLT015         | orf5       | putative outer membrane protein                   | -1.04         | 0.23254 | 0.64          | 0.43319 | -0.26         | 0.77618 |
| PSLT015         | orf5       | putative outer membrane protein                   | 0.49          | 0.61036 | 0.59          | 0.10180 | -0.72         | 0.10506 |
| PSLT016         | pefD       | chaperone                                         | 1.74          | 0.30757 | -1.33         | 0.00278 | -0.61         | 0.37275 |
| PSLT016         | pefD       | chaperone                                         | 2.29          | 0.12357 | -1.62         | 0.00592 | -0.05         | 0.95480 |
| PSLT017         | pefC       | usher protein                                     | 0.40          | 0.67561 | 0.68          | 0.03019 | -0.10         | 0.91879 |
| PSLT017         | pefC       | usher protein                                     | 1.00          | 0.19413 | 0.52          | 0.15462 | 0.24          | 0.71092 |
| PSLT018         | pefA       | major fimbrial subunit                            | 0.35          | 0.72937 | 0.72          | 0.19462 | -1.15         | 0.04682 |
| PSLT018         | pefA       | major fimbrial subunit                            | 1.93          | 0.01908 | 0.46          | 0.12243 | -0.06         | 0.88693 |
| PSLT019         | pefB       | regulatory protein                                | 0.32          | 0.58595 | -0.69         | 0.07574 | -0.95         | 0.06200 |
| PSLT019         | pefB       | regulatory protein                                | 1.01          | 0.06224 | -1.56         | 0.01660 | 0.93          | 0.08442 |
| PSLT023         | repA2      | DNA replication protein                           | -0.35         | 0.56890 | 0.75          | 0.08263 | -0.94         | 0.10942 |
| PSLT023         | repA2      | DNA replication protein                           | 0.44          | 0.57909 | 0.66          | 0.08897 | -0.35         | 0.46990 |
| PSLT025         | PSLT025    | putative cytoplasmic protein                      | 0.92          | 0.16016 | 1.69          | 0.00173 | 0.99          | 0.22008 |
| PSLT025         | PSLT025    | putative cytoplasmic protein                      | 2.68          | 0.00689 | 1.38          | 0.00932 | 0.89          | 0.07452 |
| PSLT026         | PSLT026    | putative periplasmic protein                      | 1.77          | 0.02838 | 3.83          | 0.00005 | 0.76          | 0.15236 |
| PSLT026         | PSLT026    | putative periplasmic protein                      | 2.28          | 0.02545 | 3.71          | 0.00014 | 2.48          | 0.00588 |
| PSLT027         | ccdA       | antidote                                          | 1.40          | 0.04321 | 1.57          | 0.00914 | -0.06         | 0.90592 |
| PSLT027         | ccdA       | antidote                                          | 2.30          | 0.01336 | 1.88          | 0.00093 | 0.06          | 0.90250 |
| PSLT028         | ccdB       | toxin                                             | 0.41          | 0.61765 | 1.24          | 0.01034 | -1.26         | 0.04960 |
| PSLT028         | ccdB       | toxin                                             | 1.51          | 0.04086 | 1.32          | 0.00350 | -0.35         | 0.38080 |
| PSLT029         | PSLT029    | putative cytoplasmic protein                      | 2.83          | 0.01390 | 0.36          | 0.31019 | 0.37          | 0.53126 |
| PSLT029         | PSLT029    | putative cytoplasmic protein                      | 2.60          | 0.01497 | 0.75          | 0.05984 | 0.46          | 0.41973 |
| PSLT030         | PSLT030    | putative cytoplasmic protein                      | 0.21          | 0.68193 | 1.28          | 0.00845 | -0.57         | 0.26997 |
| PSLT030         | PSLT030    | putative cytoplasmic protein                      | 1.35          | 0.13641 | 1.41          | 0.01488 | -0.40         | 0.36429 |
| PSLT031         | rsdB       | resolvase                                         | 0.11          | 0.84429 | 1.13          | 0.02172 | -0.34         | 0.36764 |
| PSLT031         | rsdB       | resolvase                                         | 1.32          | 0.04674 | 1.04          | 0.01003 | -0.38         | 0.36710 |
| PSLT032         | PSLT032    | putative diguanylate cyclase/phosphodiesterase    | -0.17         | 0.81801 | 1.33          | 0.00753 | -1.34         | 0.00572 |
| PSLT032         | PSLT032    | putative diguanylate cyclase/phosphodiesterase    | 1.56          | 0.29023 | 0.92          | 0.06397 | -0.78         | 0.20327 |
| PSLT032,1N      | PSLT032,1N | hypothetical protein PSLT032,1N                   | 0.42          | 0.37991 | 1.57          | 0.00188 | -1.15         | 0.02725 |
| PSLT032,1N      | PSLT032,1N | hypothetical protein PSLT032,1N                   | 1.28          | 0.02615 | 2.15          | 0.00021 | -0.41         | 0.29101 |
| PSLT033         | PSLT033    | putative inner membrane protein                   | 0.89          | 0.53670 | 1.38          | 0.00173 | 0.35          | 0.73071 |
| PSLT033         | PSLT033    | putative inner membrane protein                   | 0.92          | 0.22457 | 2.43          | 0.00077 | -0.92         | 0.06064 |
| PSLT036         | PSLT036    | putative transposase                              | 0.54          | 0.70368 | 0.44          | 0.16031 | -0.45         | 0.40240 |
| PSLT036         | PSLT036    | putative transposase                              | 2.14          | 0.09243 | 0.05          | 0.93145 | 1.12          | 0.01307 |
| PSLT037         | spvD       | hydrophilic protein                               | 3.85          | 0.01309 | 2.29          | 0.00012 | 2.73          | 0.00124 |
| PSLT037         | spvD       | hydrophilic protein                               | 3.70          | 0.06970 | 1.93          | 0.00145 | 2.91          | 0.00143 |
| PSLT038         | spvC       | hydrophilic protein                               | 2.24          | 0.02219 | 1.41          | 0.00520 | 0.74          | 0.16686 |
| PSLT038         | spvC       | hydrophilic protein                               | 4.11          | 0.00800 | 0.52          | 0.20189 | 2.46          | 0.00080 |
| PSLT039         | spvB       | hydrophilic protein                               | 3.10          | 0.16215 | 2.97          | 0.00004 | 3.51          | 0.00814 |
| PSLT039         | spvB       | hydrophilic protein                               | 4.39          | 0.00512 | 3.20          | 0.00008 | 3.62          | 0.00095 |
| PSLT040         | spvA       | outer membrane protein                            | 2.09          | 0.02148 | 3.54          | 0.00002 | 1.23          | 0.02278 |
| PSLT040         | spvA       | outer membrane protein                            | 3.52          | 0.00512 | 2.98          | 0.00004 | 1.42          | 0.01023 |
| PSLT041         | spvR       | regulator of spv operon                           | 0.52          | 0.57962 | 2.29          | 0.00057 | 1.60          | 0.05052 |
| PSLT041         | spvR       | regulator of spv operon                           | 2.38          | 0.05710 | 1.62          | 0.00065 | 1.90          | 0.00667 |
| PSLT042         | PSLT042    | putative integrase protein                        | 0.45          | 0.48857 | 1.91          | 0.00035 | 0.24          | 0.58025 |
| PSLT042         | PSLT042    | putative integrase protein                        | 2.23          | 0.05384 | 2.98          | 0.00004 | 1.95          | 0.04263 |
| PSLT043         | PSLT043    | type II secretion system protein                  | 2.49          | 0.03490 | 2.78          | 0.00005 | 0.58          | 0.12211 |
| PSLT043         | PSLT043    | type II secretion system protein                  | 3.56          | 0.02251 | 2.72          | 0.00048 | 1.82          | 0.00246 |

**Table S2.** Genome-wide expression of *Salmonella enterica* serovar Typhimurium inside fibroblasts

|                 |            |                                         | Intracellular WT<br>24 h p.i.                                                      |         | Intracellular <i>phoP</i><br>24 h p.i.                                              |         | Extracellular WT<br>stationary phase                                                |         |
|-----------------|------------|-----------------------------------------|------------------------------------------------------------------------------------|---------|-------------------------------------------------------------------------------------|---------|-------------------------------------------------------------------------------------|---------|
|                 |            |                                         | Relative to WT<br>exponential LB                                                   |         | Relative to <i>phoP</i><br>exponential LB                                           |         | Relative to WT<br>exponential LB                                                    |         |
|                 |            |                                         | 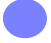 |         | 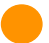 |         | 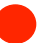 |         |
| Systematic name | Gene       | Product                                 | log2Ratio (M)                                                                      | p value | log2Ratio (M)                                                                       | p value | log2Ratio (M)                                                                       | p value |
| PSLT044         | rigA       | putative integrase protein              | 1.32                                                                               | 0.02351 | 3.64                                                                                | 0.00006 | 0.63                                                                                | 0.13477 |
| PSLT044         | rigA       | putative integrase protein              | 1.72                                                                               | 0.01443 | 3.26                                                                                | 0.00002 | 0.76                                                                                | 0.11919 |
| PSLT045         | PSLT045    | putative resolvase                      | 2.88                                                                               | 0.00918 | 3.38                                                                                | 0.00002 | 0.08                                                                                | 0.83743 |
| PSLT045         | PSLT045    | putative resolvase                      | 3.40                                                                               | 0.00673 | 3.30                                                                                | 0.00003 | 0.25                                                                                | 0.53219 |
| PSLT046         | mig-5      | putative carbonic anhydrase             | 2.61                                                                               | 0.00826 | 1.62                                                                                | 0.00134 | 0.73                                                                                | 0.17144 |
| PSLT046         | mig-5      | putative carbonic anhydrase             | 3.02                                                                               | 0.00547 | 1.85                                                                                | 0.00082 | 0.89                                                                                | 0.05827 |
| PSLT047         | PSLT047    | putative cytoplasmic protein            | 3.09                                                                               | 0.00829 | 3.33                                                                                | 0.00002 | 2.75                                                                                | 0.00098 |
| PSLT047         | PSLT047    | putative cytoplasmic protein            | 3.05                                                                               | 0.00546 | 2.83                                                                                | 0.00029 | 2.60                                                                                | 0.00021 |
| PSLT048         | tlpA       | alpha-helical coiled-coil protein       | 1.23                                                                               | 0.06459 | 2.26                                                                                | 0.00013 | -0.84                                                                               | 0.11191 |
| PSLT048         | tlpA       | alpha-helical coiled-coil protein       | 1.22                                                                               | 0.03323 | 1.81                                                                                | 0.00290 | -1.12                                                                               | 0.01276 |
| PSLT050,1N      | PSLT050,1N | hypothetical protein PSLT050,1N         | 0.13                                                                               | 0.87510 | 2.49                                                                                | 0.00015 | 0.41                                                                                | 0.61895 |
| PSLT050,1N      | PSLT050,1N | hypothetical protein PSLT050,1N         | 1.02                                                                               | 0.10226 | 2.63                                                                                | 0.00029 | 0.01                                                                                | 0.97927 |
| PSLT050,2N      | PSLT050,2N | hypothetical protein PSLT050,2N         | 0.87                                                                               | 0.08901 | 2.32                                                                                | 0.00039 | 1.56                                                                                | 0.01035 |
| PSLT050,2N      | PSLT050,2N | hypothetical protein PSLT050,2N         | 2.24                                                                               | 0.01293 | 2.90                                                                                | 0.00010 | 1.54                                                                                | 0.00223 |
| PSLT051         | PSLT051    | putative cytoplasmic protein            | 1.30                                                                               | 0.12019 | 2.71                                                                                | 0.00012 | 2.71                                                                                | 0.00043 |
| PSLT051         | PSLT051    | putative cytoplasmic protein            | 1.85                                                                               | 0.02373 | 2.38                                                                                | 0.00013 | 3.06                                                                                | 0.00010 |
| PSLT052         | parA       | plasmid partition protein A             | 0.61                                                                               | 0.29264 | 1.23                                                                                | 0.00678 | -0.59                                                                               | 0.25462 |
| PSLT052         | parA       | plasmid partition protein A             | 1.35                                                                               | 0.13351 | 0.98                                                                                | 0.01126 | 0.12                                                                                | 0.77789 |
| PSLT053         | parB       | plasmid partition protein B             | 0.27                                                                               | 0.58603 | 0.12                                                                                | 0.81688 | -0.34                                                                               | 0.67714 |
| PSLT053         | parB       | plasmid partition protein B             | 0.41                                                                               | 0.38106 | 0.00                                                                                | 0.99619 | -0.28                                                                               | 0.49299 |
| PSLT054         | samB       | DNA polymerase IV                       | -0.04                                                                              | 0.95366 | 0.94                                                                                | 0.01752 | -0.13                                                                               | 0.77015 |
| PSLT054         | samB       | DNA polymerase IV                       | 1.00                                                                               | 0.13486 | 0.37                                                                                | 0.24145 | 0.29                                                                                | 0.45178 |
| PSLT055         | samA       | SamA                                    | 1.33                                                                               | 0.05014 | 1.43                                                                                | 0.00182 | 0.45                                                                                | 0.32940 |
| PSLT055         | samA       | SamA                                    | 1.35                                                                               | 0.03223 | 0.63                                                                                | 0.19780 | 1.55                                                                                | 0.00592 |
| PSLT056         | PSLT056    | putative cytoplasmic protein            | 1.52                                                                               | 0.29869 | 0.13                                                                                | 0.70944 | 0.48                                                                                | 0.35510 |
| PSLT056         | PSLT056    | putative cytoplasmic protein            | 2.52                                                                               | 0.04376 | -0.33                                                                               | 0.24643 | 1.18                                                                                | 0.06469 |
| PSLT057         | PSLT057    | putative cytoplasmic protein            | 1.17                                                                               | 0.20957 | -0.05                                                                               | 0.88732 | 0.04                                                                                | 0.94286 |
| PSLT057         | PSLT057    | putative cytoplasmic protein            | 2.56                                                                               | 0.08204 | -0.42                                                                               | 0.39020 | 0.48                                                                                | 0.50310 |
| PSLT059         | PSLT059    | putative adenine-specific DNA methylase | 1.87                                                                               | 0.08551 | 1.11                                                                                | 0.02796 | 0.24                                                                                | 0.69970 |
| PSLT059         | PSLT059    | putative adenine-specific DNA methylase | 3.36                                                                               | 0.03288 | 1.01                                                                                | 0.01639 | 0.69                                                                                | 0.08003 |
| PSLT060         | PSLT060    | putative cytoplasmic protein            | 2.57                                                                               | 0.06463 | 2.30                                                                                | 0.00046 | 1.55                                                                                | 0.00428 |
| PSLT060         | PSLT060    | putative cytoplasmic protein            | 4.03                                                                               | 0.01319 | 2.13                                                                                | 0.03496 | 2.52                                                                                | 0.00043 |
| PSLT060,1N      | PSLT060,1N | hypothetical protein PSLT060,1N         | 1.35                                                                               | 0.20692 | 1.31                                                                                | 0.01422 | -1.09                                                                               | 0.21321 |
| PSLT060,1N      | PSLT060,1N | hypothetical protein PSLT060,1N         | 2.17                                                                               | 0.06409 | 1.23                                                                                | 0.00809 | 0.02                                                                                | 0.97313 |
| PSLT061         | PSLT061    | putative inner membrane protein         | 1.09                                                                               | 0.06755 | 0.86                                                                                | 0.05034 | -0.18                                                                               | 0.61985 |
| PSLT061         | PSLT061    | putative inner membrane protein         | 2.97                                                                               | 0.00547 | -0.13                                                                               | 0.68202 | 0.64                                                                                | 0.16926 |
| PSLT062         | PSLT062    | putative cytoplasmic protein            | -0.56                                                                              | 0.56735 | 0.89                                                                                | 0.08894 | -0.71                                                                               | 0.33136 |
| PSLT062         | PSLT062    | putative cytoplasmic protein            | 1.85                                                                               | 0.21940 | 0.54                                                                                | 0.10855 | 0.92                                                                                | 0.09703 |
| PSLT063         | PSLT063    | putative cytoplasmic protein            | 1.74                                                                               | 0.15567 | 1.00                                                                                | 0.01945 | 0.45                                                                                | 0.37584 |
| PSLT063         | PSLT063    | putative cytoplasmic protein            | 3.66                                                                               | 0.00546 | 0.85                                                                                | 0.09599 | 1.60                                                                                | 0.00459 |
| PSLT064         | PSLT064    | putative inner membrane protein         | -0.60                                                                              | 0.22608 | -1.25                                                                               | 0.02009 | -0.86                                                                               | 0.19448 |
| PSLT064         | PSLT064    | putative inner membrane protein         | 0.07                                                                               | 0.93703 | -2.32                                                                               | 0.00026 | -1.62                                                                               | 0.00634 |
| PSLT066         | ssbB       | single-strand DNA binding protein       | 3.54                                                                               | 0.04568 | 0.45                                                                                | 0.24287 | 0.81                                                                                | 0.06023 |
| PSLT066         | ssbB       | single-strand DNA binding protein       | 4.19                                                                               | 0.02652 | -0.28                                                                               | 0.50555 | 1.36                                                                                | 0.00916 |
| PSLT067         | PSLT067    | putative cytoplasmic protein            | 0.54                                                                               | 0.53887 | 0.46                                                                                | 0.17681 | 0.08                                                                                | 0.90200 |
| PSLT067         | PSLT067    | putative cytoplasmic protein            | 1.84                                                                               | 0.13291 | -0.02                                                                               | 0.95605 | 0.35                                                                                | 0.53690 |
| PSLT068         | PSLT068    | putative ParB-like nuclease             | 1.19                                                                               | 0.19865 | 1.56                                                                                | 0.00182 | 1.10                                                                                | 0.20380 |
| PSLT068         | PSLT068    | putative ParB-like nuclease             | 2.31                                                                               | 0.06201 | -0.79                                                                               | 0.03549 | 1.05                                                                                | 0.06646 |
| PSLT069         | psiB       | PsiB                                    | 0.78                                                                               | 0.30297 | 0.02                                                                                | 0.94003 | -1.09                                                                               | 0.06451 |
| PSLT069         | psiB       | PsiB                                    | 1.87                                                                               | 0.04008 | 1.46                                                                                | 0.03406 | 0.31                                                                                | 0.54533 |
| PSLT070         | psiA       | PsiA                                    | 2.27                                                                               | 0.05203 | 0.09                                                                                | 0.84028 | -0.15                                                                               | 0.75248 |
| PSLT070         | psiA       | PsiA                                    | 2.65                                                                               | 0.02098 | -0.60                                                                               | 0.10223 | 1.00                                                                                | 0.06570 |
| PSLT072         | PSLT072    | putative transglycosylase               | 2.33                                                                               | 0.00991 | 1.71                                                                                | 0.00235 | 1.40                                                                                | 0.05658 |
| PSLT072         | PSLT072    | putative transglycosylase               | 3.67                                                                               | 0.01136 | 1.60                                                                                | 0.00202 | 2.08                                                                                | 0.00103 |
| PSLT073         | traM       | mating signal protein                   | 4.91                                                                               | 0.00547 | 3.68                                                                                | 0.00026 | 6.08                                                                                | 0.00009 |
| PSLT073         | traM       | mating signal protein                   | 4.31                                                                               | 0.00547 | 2.41                                                                                | 0.00916 | 6.19                                                                                | 0.00010 |
| PSLT075         | traJ       | regulatory protein                      | -0.55                                                                              | 0.35858 | -1.14                                                                               | 0.12973 | -0.69                                                                               | 0.32226 |
| PSLT075         | traJ       | regulatory protein                      | -0.52                                                                              | 0.64143 | -0.92                                                                               | 0.03099 | 0.21                                                                                | 0.70282 |
| PSLT076         | traY       | DNA-binding protein                     | 1.30                                                                               | 0.04746 | 0.80                                                                                | 0.03484 | 2.52                                                                                | 0.00044 |
| PSLT076         | traY       | DNA-binding protein                     | 2.26                                                                               | 0.10377 | 0.27                                                                                | 0.72652 | 2.34                                                                                | 0.00033 |
| PSLT077         | traA       | pilus subunit                           | 0.56                                                                               | 0.44435 | -0.59                                                                               | 0.30478 | -1.05                                                                               | 0.02297 |
| PSLT077         | traA       | pilus subunit                           | 1.67                                                                               | 0.16842 | -1.27                                                                               | 0.04376 | 0.01                                                                                | 0.98253 |
| PSLT078         | traL       | pilus assembly protein                  | -0.89                                                                              | 0.22737 | -0.18                                                                               | 0.88768 | -2.00                                                                               | 0.00409 |
| PSLT078         | traL       | pilus assembly protein                  | -0.07                                                                              | 0.94539 | -1.02                                                                               | 0.01198 | -0.62                                                                               | 0.29870 |
| PSLT079         | traE       | pilus assembly protein                  | 2.61                                                                               | 0.03896 | 0.04                                                                                | 0.89699 | 1.28                                                                                | 0.07731 |
| PSLT079         | traE       | pilus assembly protein                  | 2.80                                                                               | 0.01946 | -0.31                                                                               | 0.54928 | 2.26                                                                                | 0.00150 |
| PSLT080         | traK       | pilus assembly protein                  | 0.22                                                                               | 0.73688 | -0.48                                                                               | 0.50919 | -0.15                                                                               | 0.83942 |
| PSLT080         | traK       | pilus assembly protein                  | 2.06                                                                               | 0.12389 | 0.39                                                                                | 0.17569 | -0.24                                                                               | 0.54172 |
| PSLT081         | traB       | pilus assembly protein                  | 2.77                                                                               | 0.01405 | 0.77                                                                                | 0.07269 | 0.52                                                                                | 0.65342 |
| PSLT081         | traB       | pilus assembly protein                  | 2.98                                                                               | 0.01199 | 0.40                                                                                | 0.30069 | 1.41                                                                                | 0.02200 |

**Table S2.** Genome-wide expression of *Salmonella enterica* serovar Typhimurium inside fibroblasts

|                 |             |                                                         | Intracellular WT<br>24 h p.i.                                                      |         | Intracellular <i>phoP</i><br>24 h p.i.                                              |         | Extracellular WT<br>stationary phase                                                |         |
|-----------------|-------------|---------------------------------------------------------|------------------------------------------------------------------------------------|---------|-------------------------------------------------------------------------------------|---------|-------------------------------------------------------------------------------------|---------|
|                 |             |                                                         | Relative to WT<br>exponential LB                                                   |         | Relative to <i>phoP</i><br>exponential LB                                           |         | Relative to WT<br>exponential LB                                                    |         |
|                 |             |                                                         |  |         |  |         | 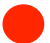 |         |
| Systematic name | Gene        | Product                                                 | log2Ratio (M)                                                                      | p value | log2Ratio (M)                                                                       | p value | log2Ratio (M)                                                                       | p value |
| PSLT082         | traP        | conjugative transfer protein                            | 1.45                                                                               | 0.33131 | 0.64                                                                                | 0.07714 | 0.75                                                                                | 0.16277 |
| PSLT082         | traP        | conjugative transfer protein                            | 2.32                                                                               | 0.24076 | 1.19                                                                                | 0.00643 | 0.96                                                                                | 0.15101 |
| PSLT083         | trbD        | conjugative transfer protein                            | 1.63                                                                               | 0.01844 | 2.63                                                                                | 0.00020 | 1.73                                                                                | 0.05780 |
| PSLT083         | trbD        | conjugative transfer protein                            | 3.05                                                                               | 0.00552 | 2.00                                                                                | 0.00213 | 2.51                                                                                | 0.01395 |
| PSLT084         | traV        | pilus assembly protein                                  | -0.50                                                                              | 0.66698 | 0.46                                                                                | 0.44103 | -0.47                                                                               | 0.35698 |
| PSLT084         | traV        | pilus assembly protein                                  | 2.19                                                                               | 0.01813 | 0.94                                                                                | 0.01259 | 0.42                                                                                | 0.38273 |
| PSLT085         | traR        | conjugative transfer protein                            | 0.83                                                                               | 0.13547 | 1.09                                                                                | 0.27176 | 0.79                                                                                | 0.29557 |
| PSLT085         | traR        | conjugative transfer protein                            | 0.51                                                                               | 0.64635 | 0.16                                                                                | 0.61622 | 0.12                                                                                | 0.89078 |
| PSLT087         | PSLT087     | OrfG2                                                   | 0.79                                                                               | 0.50995 | 0.80                                                                                | 0.14052 | 0.41                                                                                | 0.64142 |
| PSLT087         | PSLT087     | OrfG2                                                   | 3.71                                                                               | 0.00547 | 2.02                                                                                | 0.03244 | 2.64                                                                                | 0.01222 |
| PSLT088         | traC        | ATP-binding protein                                     | 1.43                                                                               | 0.14806 | 0.67                                                                                | 0.09577 | 0.28                                                                                | 0.54242 |
| PSLT088         | traC        | ATP-binding protein                                     | 2.95                                                                               | 0.01363 | 0.49                                                                                | 0.15812 | 1.14                                                                                | 0.01681 |
| PSLT089         | trbI        | pilus assembly protein                                  | -0.17                                                                              | 0.87553 | -0.99                                                                               | 0.09587 | -1.13                                                                               | 0.90141 |
| PSLT089         | trbI        | pilus assembly protein                                  | 0.84                                                                               | 0.28413 | 0.08                                                                                | 0.79941 | -0.38                                                                               | 0.50840 |
| PSLT091         | traW        | pilus assembly protein                                  | 1.27                                                                               | 0.44740 | -0.67                                                                               | 0.25321 | 1.70                                                                                | 0.19524 |
| PSLT091         | traW        | pilus assembly protein                                  | 3.16                                                                               | 0.02226 | -0.14                                                                               | 0.74176 | 1.00                                                                                | 0.30923 |
| PSLT092         | traU        | pilus assembly protein                                  | 1.90                                                                               | 0.03651 | 0.58                                                                                | 0.12628 | 0.93                                                                                | 0.05510 |
| PSLT092         | traU        | pilus assembly protein                                  | 2.63                                                                               | 0.00927 | 0.62                                                                                | 0.07251 | 0.84                                                                                | 0.18542 |
| PSLT094         | trbC        | pilus assembly protein                                  | 1.86                                                                               | 0.20564 | 0.28                                                                                | 0.39215 | -0.25                                                                               | 0.64906 |
| PSLT094         | trbC        | pilus assembly protein                                  | 2.18                                                                               | 0.07022 | -0.84                                                                               | 0.05729 | 0.19                                                                                | 0.64347 |
| PSLT094, 1N     | PSLT094, 1N | hypothetical protein PSLT094, 1N                        | 0.36                                                                               | 0.51734 | -0.01                                                                               | 0.97910 | -1.41                                                                               | 0.04280 |
| PSLT094, 1N     | PSLT094, 1N | hypothetical protein PSLT094, 1N                        | 1.48                                                                               | 0.11489 | -0.38                                                                               | 0.35432 | 0.38                                                                                | 0.37158 |
| PSLT095         | traN        | mating pair stabilization protein                       | 1.43                                                                               | 0.11638 | 0.11                                                                                | 0.75781 | 0.64                                                                                | 0.35403 |
| PSLT095         | traN        | mating pair stabilization protein                       | 1.59                                                                               | 0.03477 | -0.81                                                                               | 0.21059 | 2.06                                                                                | 0.00524 |
| PSLT097         | traF        | pilus assembly protein                                  | 0.52                                                                               | 0.30837 | 1.14                                                                                | 0.03443 | -1.29                                                                               | 0.01661 |
| PSLT097         | traF        | pilus assembly protein                                  | 2.31                                                                               | 0.01964 | 1.42                                                                                | 0.00268 | 0.94                                                                                | 0.03770 |
| PSLT098         | traQ        | pilin chaperone                                         | 1.65                                                                               | 0.04720 | 1.28                                                                                | 0.00588 | 0.99                                                                                | 0.26020 |
| PSLT098         | traQ        | pilin chaperone                                         | 3.47                                                                               | 0.00546 | 0.70                                                                                | 0.02785 | 2.32                                                                                | 0.00043 |
| PSLT099         | trbB        | conjugative transfer protein                            | 0.11                                                                               | 0.86910 | 0.84                                                                                | 0.06195 | -0.62                                                                               | 0.15591 |
| PSLT099         | trbB        | conjugative transfer protein                            | 1.55                                                                               | 0.07945 | 0.12                                                                                | 0.70633 | 0.21                                                                                | 0.69062 |
| PSLT100         | traH        | pilus assembly protein                                  | 1.08                                                                               | 0.22862 | 0.68                                                                                | 0.07788 | 0.71                                                                                | 0.29948 |
| PSLT100         | traH        | pilus assembly protein                                  | 2.53                                                                               | 0.08533 | 0.38                                                                                | 0.35584 | 0.21                                                                                | 0.63608 |
| PSLT101         | traG        | mating pair stabilization and pilus assembly protein    | 2.02                                                                               | 0.06999 | 3.03                                                                                | 0.00018 | 2.45                                                                                | 0.00090 |
| PSLT101         | traG        | mating pair stabilization and pilus assembly protein    | 2.73                                                                               | 0.02974 | 2.90                                                                                | 0.00010 | 2.58                                                                                | 0.00017 |
| PSLT102         | traS        | entry exclusion protein                                 | 1.56                                                                               | 0.03932 | 3.66                                                                                | 0.00003 | 1.09                                                                                | 0.04710 |
| PSLT102         | traS        | entry exclusion protein                                 | 1.73                                                                               | 0.02320 | 3.81                                                                                | 0.00002 | 1.87                                                                                | 0.00142 |
| PSLT103         | traT        | surface exclusion protein                               | 0.88                                                                               | 0.31057 | 4.62                                                                                | 0.00001 | 1.90                                                                                | 0.01709 |
| PSLT103         | traT        | surface exclusion protein                               | 1.44                                                                               | 0.19050 | 4.32                                                                                | 0.00002 | 1.49                                                                                | 0.01680 |
| PSLT104         | traD        | ATP-binding protein/DNA transporter                     | 2.87                                                                               | 0.00739 | 3.20                                                                                | 0.00007 | 0.79                                                                                | 0.06377 |
| PSLT104         | traD        | ATP-binding protein/DNA transporter                     | 4.31                                                                               | 0.01449 | 3.38                                                                                | 0.00004 | 1.53                                                                                | 0.00517 |
| PSLT105         | trbH        | conjugative transfer protein                            | 1.67                                                                               | 0.05345 | 3.60                                                                                | 0.00011 | 0.47                                                                                | 0.39537 |
| PSLT105         | trbH        | conjugative transfer protein                            | 2.04                                                                               | 0.03231 | 3.13                                                                                | 0.00011 | 0.06                                                                                | 0.91584 |
| PSLT106         | PSLT106     | MvpA-like protein                                       | 2.56                                                                               | 0.00925 | 3.32                                                                                | 0.00006 | -0.04                                                                               | 0.93102 |
| PSLT106         | PSLT106     | MvpA-like protein                                       | 4.05                                                                               | 0.00547 | 3.23                                                                                | 0.00006 | 0.99                                                                                | 0.01955 |
| PSLT107         | PSLT107     | putative cytoplasmic protein                            | 4.36                                                                               | 0.00512 | 5.23                                                                                | 0.00000 | 2.05                                                                                | 0.00081 |
| PSLT107         | PSLT107     | putative cytoplasmic protein                            | 4.89                                                                               | 0.00514 | 4.80                                                                                | 0.00007 | 2.63                                                                                | 0.00034 |
| PSLT108         | tral        | oriT nickase/helicase                                   | 1.83                                                                               | 0.03408 | 1.59                                                                                | 0.00401 | -0.24                                                                               | 0.71818 |
| PSLT108         | tral        | oriT nickase/helicase                                   | 3.37                                                                               | 0.02352 | 1.55                                                                                | 0.00319 | -0.06                                                                               | 0.88780 |
| PSLT110         | traX        | pilin subunit acetylation                               | -0.11                                                                              | 0.83532 | -1.00                                                                               | 0.03395 | -1.11                                                                               | 0.09646 |
| PSLT110         | traX        | pilin subunit acetylation                               | 1.60                                                                               | 0.02277 | -0.56                                                                               | 0.09908 | -0.36                                                                               | 0.50024 |
| PSLT111         | finO        | finP binding-protein                                    | 1.50                                                                               | 0.18017 | 1.21                                                                                | 0.01336 | -0.55                                                                               | 0.13805 |
| PSLT111         | finO        | finP binding-protein                                    | 2.12                                                                               | 0.11468 | 0.92                                                                                | 0.01273 | 0.24                                                                                | 0.53450 |
| STM0002         | thrA        | bifunctional aspartokinase I/homoserine dehydrogenase I | 0.37                                                                               | 0.62845 | -0.54                                                                               | 0.11836 | -1.81                                                                               | 0.00963 |
| STM0002         | thrA        | bifunctional aspartokinase I/homoserine dehydrogenase I | 0.32                                                                               | 0.64452 | -0.15                                                                               | 0.64847 | -2.17                                                                               | 0.00140 |
| STM0003         | thrB        | homoserine kinase                                       | -1.30                                                                              | 0.18742 | -0.06                                                                               | 0.84412 | -0.77                                                                               | 0.08797 |
| STM0003         | thrB        | homoserine kinase                                       | 1.02                                                                               | 0.06251 | -0.35                                                                               | 0.24131 | -1.07                                                                               | 0.03493 |
| STM0004         | thrC        | threonine synthase                                      | -1.33                                                                              | 0.03916 | -0.57                                                                               | 0.09294 | -1.27                                                                               | 0.07834 |
| STM0004         | thrC        | threonine synthase                                      | 0.80                                                                               | 0.22006 | 0.32                                                                                | 0.43538 | -1.45                                                                               | 0.02807 |
| STM0005         | yaaA        | hypothetical protein STM0005                            | -1.05                                                                              | 0.12753 | -0.38                                                                               | 0.18228 | -1.30                                                                               | 0.01063 |
| STM0005         | yaaA        | hypothetical protein STM0005                            | -0.55                                                                              | 0.31077 | -0.37                                                                               | 0.22720 | -0.48                                                                               | 0.19818 |
| STM0006         | yaaJ        | putative alanine/glycine transport protein              | -1.38                                                                              | 0.08984 | -1.07                                                                               | 0.00735 | -1.66                                                                               | 0.00295 |
| STM0006         | yaaJ        | putative alanine/glycine transport protein              | 0.01                                                                               | 0.99547 | -1.66                                                                               | 0.00056 | -0.94                                                                               | 0.03485 |
| STM0007         | talB        | transaldolase                                           | -1.64                                                                              | 0.02576 | 0.14                                                                                | 0.70954 | -0.88                                                                               | 0.11601 |
| STM0007         | talB        | transaldolase                                           | -0.64                                                                              | 0.16904 | 0.17                                                                                | 0.65154 | -0.38                                                                               | 0.35457 |
| STM0008         | mogA        | molybdenum cofactor biosynthesis protein                | -1.97                                                                              | 0.01977 | -0.90                                                                               | 0.01659 | -1.43                                                                               | 0.02038 |
| STM0008         | mogA        | molybdenum cofactor biosynthesis protein                | -0.46                                                                              | 0.55708 | -0.38                                                                               | 0.36682 | -1.11                                                                               | 0.01360 |
| STM0009         | yaaH        | putative regulatory protein                             | -0.51                                                                              | 0.68300 | -0.08                                                                               | 0.91349 | 1.71                                                                                | 0.00339 |
| STM0009         | yaaH        | putative regulatory protein                             | -0.17                                                                              | 0.88807 | 0.38                                                                                | 0.47781 | 1.91                                                                                | 0.00306 |
| STM0010         | htgA        | positive regulator                                      | -1.44                                                                              | 0.05309 | -0.37                                                                               | 0.25043 | -0.30                                                                               | 0.47113 |
| STM0010         | htgA        | positive regulator                                      | -2.52                                                                              | 0.00871 | -1.54                                                                               | 0.00261 | -3.61                                                                               | 0.00071 |

**Table S2.** Genome-wide expression of *Salmonella enterica* serovar Typhimurium inside fibroblasts

|                 |            |                                          | Intracellular WT<br>24 h p.i.                                                      |         | Intracellular <i>phoP</i><br>24 h p.i.                                              |         | Extracellular WT<br>stationary phase                                                |         |
|-----------------|------------|------------------------------------------|------------------------------------------------------------------------------------|---------|-------------------------------------------------------------------------------------|---------|-------------------------------------------------------------------------------------|---------|
|                 |            |                                          | Relative to WT<br>exponential LB                                                   |         | Relative to <i>phoP</i><br>exponential LB                                           |         | Relative to WT<br>exponential LB                                                    |         |
|                 |            |                                          |  |         |  |         |  |         |
| Systematic name | Gene       | Product                                  | log2Ratio (M)                                                                      | p value | log2Ratio (M)                                                                       | p value | log2Ratio (M)                                                                       | p value |
| STM0011         | yaal       | putative periplasmic protein             | -0.85                                                                              | 0.22408 | -1.09                                                                               | 0.01036 | -0.36                                                                               | 0.58626 |
| STM0011         | yaal       | putative periplasmic protein             | 0.40                                                                               | 0.43196 | -0.78                                                                               | 0.03244 | -0.80                                                                               | 0.14249 |
| STM0012         | dnaK       | molecular chaperone DnaK                 | -1.65                                                                              | 0.05569 | 0.28                                                                                | 0.42555 | -1.60                                                                               | 0.00305 |
| STM0012         | dnaK       | molecular chaperone DnaK                 | -0.63                                                                              | 0.24615 | 0.31                                                                                | 0.42764 | -1.17                                                                               | 0.00805 |
| STM0013         | dnaJ       | heat shock protein                       | -1.20                                                                              | 0.04310 | 0.10                                                                                | 0.73282 | -1.66                                                                               | 0.00259 |
| STM0013         | dnaJ       | heat shock protein                       | 0.19                                                                               | 0.68209 | -0.46                                                                               | 0.10333 | -1.52                                                                               | 0.00333 |
| STM0014         | STM0014    | putative transcriptional regulator       | -1.39                                                                              | 0.03028 | -0.32                                                                               | 0.48259 | 0.05                                                                                | 0.90354 |
| STM0014         | STM0014    | putative transcriptional regulator       | -1.23                                                                              | 0.17298 | -0.87                                                                               | 0.09566 | -1.62                                                                               | 0.14034 |
| STM0015         | STM0015    | putative bacteriophage protein           | -0.43                                                                              | 0.42520 | -1.54                                                                               | 0.02284 | -0.83                                                                               | 0.24642 |
| STM0015         | STM0015    | putative bacteriophage protein           | -0.16                                                                              | 0.88591 | -1.35                                                                               | 0.00195 | -1.73                                                                               | 0.04162 |
| STM0016         | STM0016    | hypothetical protein STM0016             | 0.07                                                                               | 0.92280 | -1.10                                                                               | 0.00976 | -0.09                                                                               | 0.92277 |
| STM0016         | STM0016    | hypothetical protein STM0016             | 1.25                                                                               | 0.07942 | 0.03                                                                                | 0.93480 | -0.41                                                                               | 0.55782 |
| STM0017         | STM0017    | hypothetical protein STM0017             | 0.88                                                                               | 0.23256 | -0.51                                                                               | 0.44867 | 0.49                                                                                | 0.39691 |
| STM0017         | STM0017    | hypothetical protein STM0017             | 2.62                                                                               | 0.02064 | -0.33                                                                               | 0.50077 | 0.55                                                                                | 0.42002 |
| STM0018         | STM0018    | putative exochitinase                    | -0.36                                                                              | 0.45159 | 0.12                                                                                | 0.83650 | -0.71                                                                               | 0.26906 |
| STM0018         | STM0018    | putative exochitinase                    | 0.60                                                                               | 0.21115 | -0.97                                                                               | 0.05172 | -0.15                                                                               | 0.77563 |
| STM0019         | STM0019    | putative hydroxymethyltransferase        | 1.64                                                                               | 0.22475 | -0.52                                                                               | 0.24083 | -0.74                                                                               | 0.19391 |
| STM0019         | STM0019    | putative hydroxymethyltransferase        | 2.22                                                                               | 0.13309 | -1.31                                                                               | 0.00232 | 0.11                                                                                | 0.79316 |
| STM0020         | STM0020    | putative cytoplasmic protein             | 0.16                                                                               | 0.72937 | -0.22                                                                               | 0.54919 | -0.94                                                                               | 0.05154 |
| STM0020         | STM0020    | putative cytoplasmic protein             | 1.90                                                                               | 0.05566 | -0.85                                                                               | 0.10963 | 0.09                                                                                | 0.83437 |
| STM0021         | bcfA       | fimbrial subunit                         | -0.29                                                                              | 0.74272 | -0.29                                                                               | 0.38775 | -0.02                                                                               | 0.97120 |
| STM0021         | bcfA       | fimbrial subunit                         | 0.38                                                                               | 0.66856 | -0.95                                                                               | 0.07685 | -0.05                                                                               | 0.90096 |
| STM0022         | bcfB       | fimbrial chaparone                       | 0.14                                                                               | 0.75900 | -0.60                                                                               | 0.10797 | -0.07                                                                               | 0.92086 |
| STM0022         | bcfB       | fimbrial chaparone                       | 0.78                                                                               | 0.19598 | -0.43                                                                               | 0.24913 | 1.07                                                                                | 0.04189 |
| STM0023         | bcfC       | fimbrial usher                           | -0.37                                                                              | 0.52059 | -0.64                                                                               | 0.17303 | -0.53                                                                               | 0.56299 |
| STM0023         | bcfC       | fimbrial usher                           | 0.32                                                                               | 0.46003 | -1.97                                                                               | 0.00442 | 0.54                                                                                | 0.44090 |
| STM0024         | bcfD       | fimbrial subunit                         | 0.15                                                                               | 0.78012 | -0.13                                                                               | 0.76206 | -1.08                                                                               | 0.02545 |
| STM0024         | bcfD       | fimbrial subunit                         | 2.37                                                                               | 0.01219 | -0.36                                                                               | 0.53988 | 0.21                                                                                | 0.84131 |
| STM0025         | bcfE       | fimbrial subunit                         | -0.36                                                                              | 0.51479 | -0.52                                                                               | 0.42998 | -0.72                                                                               | 0.56023 |
| STM0025         | bcfE       | fimbrial subunit                         | -0.76                                                                              | 0.27018 | -0.98                                                                               | 0.02728 | -0.62                                                                               | 0.35626 |
| STM0026         | bcfF       | fimbrial subunit                         | -0.40                                                                              | 0.60177 | 0.43                                                                                | 0.67211 | 0.02                                                                                | 0.96386 |
| STM0026         | bcfF       | fimbrial subunit                         | -1.55                                                                              | 0.03535 | -1.06                                                                               | 0.01750 | -0.40                                                                               | 0.73457 |
| STM0027         | bcfG       | fimbrial chaparone                       | -0.14                                                                              | 0.82901 | 0.18                                                                                | 0.60282 | -0.24                                                                               | 0.66117 |
| STM0027         | bcfG       | fimbrial chaparone                       | 0.39                                                                               | 0.34512 | 0.61                                                                                | 0.13135 | 0.33                                                                                | 0.43711 |
| STM0028         | bcfH       | putative thiol-disulfide isomerase       | -0.46                                                                              | 0.34898 | -0.23                                                                               | 0.57080 | -0.62                                                                               | 0.37462 |
| STM0028         | bcfH       | putative thiol-disulfide isomerase       | -0.19                                                                              | 0.82430 | -0.28                                                                               | 0.48091 | -2.41                                                                               | 0.08252 |
| STM0028,1n      | STM0028,1n | hypothetical protein STM0028,1n          | 0.01                                                                               | 0.97757 | 0.10                                                                                | 0.73971 | 0.26                                                                                | 0.50041 |
| STM0028,1n      | STM0028,1n | hypothetical protein STM0028,1n          | -0.63                                                                              | 0.23911 | -0.49                                                                               | 0.34500 | 0.25                                                                                | 0.63757 |
| STM0029         | STM0029    | putative transcriptional regulator       | 0.97                                                                               | 0.12856 | -0.22                                                                               | 0.52902 | 0.44                                                                                | 0.47578 |
| STM0029         | STM0029    | putative transcriptional regulator       | 2.33                                                                               | 0.00795 | -0.24                                                                               | 0.63567 | 1.30                                                                                | 0.01499 |
| STM0030         | STM0030    | putative transcriptional regulator       | -0.14                                                                              | 0.80152 | 0.01                                                                                | 0.98835 | 0.18                                                                                | 0.74824 |
| STM0030         | STM0030    | putative transcriptional regulator       | -0.35                                                                              | 0.58781 | 0.33                                                                                | 0.56029 | 0.19                                                                                | 0.70875 |
| STM0031         | STM0031    | putative transcriptional regulator       | 1.44                                                                               | 0.05971 | -0.07                                                                               | 0.89715 | 2.69                                                                                | 0.00431 |
| STM0031         | STM0031    | putative transcriptional regulator       | 3.17                                                                               | 0.00547 | 0.79                                                                                | 0.32740 | 3.19                                                                                | 0.00022 |
| STM0032         | STM0032    | putative arylsulfatase                   | -0.39                                                                              | 0.42641 | 0.77                                                                                | 0.05165 | -0.12                                                                               | 0.88032 |
| STM0032         | STM0032    | putative arylsulfatase                   | 0.71                                                                               | 0.27883 | -0.22                                                                               | 0.59904 | 0.40                                                                                | 0.45322 |
| STM0033         | STM0033    | putative 5'-nucleotidase                 | -0.59                                                                              | 0.37229 | 0.15                                                                                | 0.75972 | -0.17                                                                               | 0.79506 |
| STM0033         | STM0033    | putative 5'-nucleotidase                 | 0.51                                                                               | 0.40306 | 0.41                                                                                | 0.36597 | 0.64                                                                                | 0.09905 |
| STM0034         | STM0034    | putative outer membrane/exported protein | -0.48                                                                              | 0.32287 | -1.70                                                                               | 0.00357 | 0.04                                                                                | 0.95985 |
| STM0034         | STM0034    | putative outer membrane/exported protein | 6.46                                                                               | 0.00595 | 0.86                                                                                | 0.27176 | 1.89                                                                                | 0.01197 |
| STM0035         | STM0035    | putative arylsulfatase                   | 0.26                                                                               | 0.65824 | 0.32                                                                                | 0.34348 | -0.03                                                                               | 0.96342 |
| STM0035         | STM0035    | putative arylsulfatase                   | 1.73                                                                               | 0.01408 | 0.14                                                                                | 0.72026 | 0.99                                                                                | 0.04902 |
| STM0036         | STM0036    | putative arylsulfatase regulator         | -0.02                                                                              | 0.97698 | -1.00                                                                               | 0.01685 | -0.73                                                                               | 0.13499 |
| STM0036         | STM0036    | putative arylsulfatase regulator         | 0.70                                                                               | 0.27232 | 0.83                                                                                | 0.50980 | 1.34                                                                                | 0.00487 |
| STM0037         | STM0037    | putative cytoplasmic protein             | -0.25                                                                              | 0.60019 | -0.57                                                                               | 0.37644 | -0.30                                                                               | 0.58972 |
| STM0037         | STM0037    | putative cytoplasmic protein             | 2.22                                                                               | 0.05139 | -0.54                                                                               | 0.14646 | 0.84                                                                                | 0.16779 |
| STM0038         | STM0038    | putative arylsulfatase                   | -1.39                                                                              | 0.03517 | -0.43                                                                               | 0.28451 | -0.72                                                                               | 0.19757 |
| STM0038         | STM0038    | putative arylsulfatase                   | 0.14                                                                               | 0.83865 | 0.17                                                                                | 0.54768 | 0.19                                                                                | 0.65697 |
| STM0039         | nhaA       | Na <sup>+</sup> /H antiporter            | -0.78                                                                              | 0.11374 | 1.27                                                                                | 0.01909 | -1.42                                                                               | 0.00459 |
| STM0039         | nhaA       | Na <sup>+</sup> /H antiporter            | -0.42                                                                              | 0.40578 | 1.19                                                                                | 0.00536 | -1.29                                                                               | 0.05368 |
| STM0040         | nhaR       | transcriptional activator                | -0.32                                                                              | 0.46736 | 1.48                                                                                | 0.00764 | -1.74                                                                               | 0.01832 |
| STM0040         | nhaR       | transcriptional activator                | 0.72                                                                               | 0.32145 | 1.64                                                                                | 0.00101 | -0.43                                                                               | 0.40198 |
| STM0041         | STM0041    | putative glycosyl hydrolase              | -0.50                                                                              | 0.32184 | 1.48                                                                                | 0.02752 | -1.38                                                                               | 0.01739 |
| STM0041         | STM0041    | putative glycosyl hydrolase              | 0.77                                                                               | 0.14788 | 1.72                                                                                | 0.00249 | 0.19                                                                                | 0.82855 |
| STM0042         | STM0042    | putative sodium galactoside symporter    | -0.57                                                                              | 0.35761 | -0.49                                                                               | 0.18616 | 0.36                                                                                | 0.58027 |
| STM0042         | STM0042    | putative sodium galactoside symporter    | 1.26                                                                               | 0.08722 | -0.39                                                                               | 0.33210 | 1.21                                                                                | 0.01914 |
| STM0043         | rpsT       | 30S ribosomal protein S20                | -3.57                                                                              | 0.02952 | -1.89                                                                               | 0.00939 | -3.41                                                                               | 0.00006 |
| STM0043         | rpsT       | 30S ribosomal protein S20                | -3.16                                                                              | 0.08305 | -2.04                                                                               | 0.00550 | -4.38                                                                               | 0.00417 |
| STM0044         | yaaY       | putative cytoplasmic protein             | -2.28                                                                              | 0.01999 | -1.08                                                                               | 0.01801 | -1.65                                                                               | 0.00259 |
| STM0044         | yaaY       | putative cytoplasmic protein             | -1.95                                                                              | 0.01033 | -1.51                                                                               | 0.00177 | -1.21                                                                               | 0.17932 |

**Table S2.** Genome-wide expression of *Salmonella enterica* serovar Typhimurium inside fibroblasts

Intracellular WT 24 h p.i.      Intracellular *phoP* 24 h p.i.      Extracellular WT stationary phase

Relative to WT exponential LB      Relative to *phoP* exponential LB      Relative to WT exponential LB

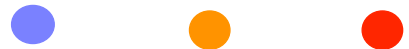

| Systematic name | Gene    | Product                                                    | log2Ratio (M) | p value | log2Ratio (M) | p value | log2Ratio (M) | p value |
|-----------------|---------|------------------------------------------------------------|---------------|---------|---------------|---------|---------------|---------|
| STM0045         | ribF    | hypothetical protein STM0045                               | -1.51         | 0.09468 | -0.87         | 0.01196 | -2.83         | 0.00014 |
| STM0045         | ribF    | hypothetical protein STM0045                               | -0.96         | 0.06414 | -0.20         | 0.48678 | -2.37         | 0.00110 |
| STM0046         | ileS    | isoleucyl-tRNA synthetase                                  | -2.56         | 0.00829 | -0.57         | 0.12575 | -3.04         | 0.00014 |
| STM0046         | ileS    | isoleucyl-tRNA synthetase                                  | -1.64         | 0.04580 | -0.69         | 0.06061 | -2.46         | 0.00382 |
| STM0047         | lspA    | signal peptidase II                                        | -1.98         | 0.01400 | -0.28         | 0.34032 | -2.88         | 0.00014 |
| STM0047         | lspA    | signal peptidase II                                        | -1.85         | 0.04338 | -0.07         | 0.83295 | -2.94         | 0.00159 |
| STM0048         | slpA    | FKBP-type peptidyl-prolyl cis-trans isomerase              | -1.40         | 0.02149 | -0.59         | 0.07725 | -2.00         | 0.00510 |
| STM0048         | slpA    | FKBP-type peptidyl-prolyl cis-trans isomerase              | 0.64          | 0.71993 | -0.98         | 0.02587 | -1.36         | 0.06469 |
| STM0049         | lytB    | 4-hydroxy-3-methylbut-2-enyl diphosphate reductase         | -2.41         | 0.00639 | 0.23          | 0.80106 | -2.52         | 0.00187 |
| STM0049         | lytB    | 4-hydroxy-3-methylbut-2-enyl diphosphate reductase         | -1.58         | 0.02996 | -0.58         | 0.06964 | -1.94         | 0.01268 |
| STM0050         | STM0050 | putative nitrite reductase                                 | -0.84         | 0.16492 | 0.24          | 0.37753 | -0.38         | 0.50663 |
| STM0050         | STM0050 | putative nitrite reductase                                 | -0.01         | 0.98974 | 0.06          | 0.86757 | -0.01         | 0.99158 |
| STM0051         | rihC    | putative purine nucleoside hydrolase                       | 0.04          | 0.92542 | 0.69          | 0.05580 | -0.73         | 0.07037 |
| STM0051         | rihC    | putative purine nucleoside hydrolase                       | 1.05          | 0.08725 | 0.71          | 0.09218 | -0.16         | 0.66436 |
| STM0052         | STM0052 | putative transcriptional regulator                         | 0.23          | 0.62974 | -0.15         | 0.66649 | -0.33         | 0.56325 |
| STM0052         | STM0052 | putative transcriptional regulator                         | 1.12          | 0.04908 | -0.24         | 0.51672 | 0.52          | 0.25040 |
| STM0053         | STM0053 | putative transcriptional regulator                         | 0.52          | 0.31521 | -0.28         | 0.78598 | -0.33         | 0.72283 |
| STM0053         | STM0053 | putative transcriptional regulator                         | -1.35         | 0.11657 | 0.44          | 0.32008 | -0.90         | 0.27960 |
| STM0054         | STM0054 | putative oxalacetate decarboxylase subunit beta            | 1.62          | 0.20087 | 0.58          | 0.49522 | -0.36         | 0.46816 |
| STM0054         | STM0054 | putative oxalacetate decarboxylase subunit beta            | 1.84          | 0.17699 | 0.40          | 0.31199 | -0.15         | 0.75383 |
| STM0054         | STM0054 | putative oxalacetate decarboxylase subunit beta            | 2.08          | 0.21134 | -0.73         | 0.08172 | -0.08         | 0.86572 |
| STM0054         | STM0054 | putative oxalacetate decarboxylase subunit beta            | 3.17          | 0.01479 | -0.09         | 0.79545 | 0.26          | 0.65347 |
| STM0056         | STM0056 | putative oxaloacetate decarboxylase subunit gamma          | 3.11          | 0.01114 | -1.41         | 0.00437 | 0.16          | 0.01079 |
| STM0056         | STM0056 | putative oxaloacetate decarboxylase subunit gamma          | 3.60          | 0.01210 | -1.78         | 0.00067 | -0.19         | 0.76309 |
| STM0057         | STM0057 | putative citrate-sodium symporter                          | 0.78          | 0.37575 | -1.36         | 0.14807 | 0.32          | 0.44242 |
| STM0057         | STM0057 | putative citrate-sodium symporter                          | 1.38          | 0.11807 | -1.45         | 0.01105 | 0.39          | 0.44235 |
| STM0058         | citC2   | putative citrate lyase synthetase                          | -1.08         | 0.23064 | 0.58          | 0.45095 | -0.64         | 0.14173 |
| STM0058         | citC2   | putative citrate lyase synthetase                          | -0.29         | 0.65494 | -0.50         | 0.13285 | -0.61         | 0.22401 |
| STM0059         | citD2   | putative citrate lyase acyl carrier protein gamma chain    | 0.67          | 0.56507 | 0.08          | 0.82309 | -0.45         | 0.62904 |
| STM0059         | citD2   | putative citrate lyase acyl carrier protein gamma chain    | 1.32          | 0.15259 | -0.21         | 0.62973 | -0.50         | 0.48583 |
| STM0060         | citE2   | putative citrate lyase beta chain                          | 0.90          | 0.08701 | 0.17          | 0.65706 | 0.14          | 0.83480 |
| STM0060         | citE2   | putative citrate lyase beta chain                          | 1.27          | 0.12228 | -0.63         | 0.06702 | 1.17          | 0.12646 |
| STM0061         | citF2   | putative citrate lyase alpha chain/citrate-ACP transferase | -0.01         | 0.97472 | -0.56         | 0.11593 | -0.57         | 0.34869 |
| STM0061         | citF2   | putative citrate lyase alpha chain/citrate-ACP transferase | 2.35          | 0.01479 | -0.71         | 0.24847 | -1.04         | 0.11693 |
| STM0062         | citX2   | putative cytoplasmic protein                               | -0.07         | 0.89872 | -0.21         | 0.48097 | -0.65         | 0.39419 |
| STM0062         | citX2   | putative cytoplasmic protein                               | 0.79          | 0.49472 | -0.51         | 0.15162 | 0.22          | 0.77436 |
| STM0063         | citG2   | triphosphoribosyl-dephospho-CoA synthase                   | -0.73         | 0.12104 | -0.32         | 0.55031 | 1.89          | 0.10304 |
| STM0063         | citG2   | triphosphoribosyl-dephospho-CoA synthase                   | -0.06         | 0.90690 | -0.81         | 0.01940 | 1.29          | 0.00765 |
| STM0064         | dapB    | dihydrodipicolinate reductase                              | -0.31         | 0.63234 | 0.11          | 0.78951 | -1.10         | 0.09255 |
| STM0064         | dapB    | dihydrodipicolinate reductase                              | -0.57         | 0.36958 | -0.49         | 0.37333 | -2.12         | 0.04235 |
| STM0066         | carA    | carbamoyl-phosphate synthase small subunit                 | -1.19         | 0.03541 | 1.05          | 0.00926 | -1.70         | 0.00269 |
| STM0066         | carA    | carbamoyl-phosphate synthase small subunit                 | -1.19         | 0.03781 | 0.90          | 0.03406 | -0.74         | 0.12409 |
| STM0067         | carB    | carbamoyl-phosphate synthase large subunit                 | -1.33         | 0.06815 | 0.06          | 0.89964 | -1.00         | 0.26081 |
| STM0067         | carB    | carbamoyl-phosphate synthase large subunit                 | -0.44         | 0.38011 | 0.51          | 0.13929 | -1.89         | 0.13456 |
| STM0068         | caiF    | of cai/fix operon transcriptional regulator                | 3.59          | 0.09758 | 3.86          | 0.00062 | 5.01          | 0.00139 |
| STM0068         | caiF    | of cai/fix operon transcriptional regulator                | 1.07          | 0.13027 | -0.01         | 0.98617 | 2.19          | 0.00543 |
| STM0069         | caiE    | carnitine racemase stimulation factor                      | 0.61          | 0.40578 | 0.23          | 0.59715 | 0.29          | 0.60389 |
| STM0069         | caiE    | carnitine racemase stimulation factor                      | 2.37          | 0.00778 | -0.35         | 0.40099 | 2.43          | 0.00070 |
| STM0070         | caiD    | carnitiny-CoA dehydratase                                  | 0.66          | 0.48186 | 0.59          | 0.36682 | -0.24         | 0.58410 |
| STM0070         | caiD    | carnitiny-CoA dehydratase                                  | 1.61          | 0.06391 | 0.19          | 0.65555 | 0.31          | 0.50482 |
| STM0071         | caiC    | crotonobetaine/carnitine-CoA ligase                        | -0.24         | 0.76010 | -0.28         | 0.33278 | -0.85         | 0.03868 |
| STM0071         | caiC    | crotonobetaine/carnitine-CoA ligase                        | 1.55          | 0.08653 | -0.83         | 0.02054 | 1.07          | 0.02852 |
| STM0072         | caiB    | crotonobetainyl-CoA:carnitineCoA-transferase               | -0.06         | 0.90024 | 1.26          | 0.00463 | 0.24          | 0.61710 |
| STM0072         | caiB    | crotonobetainyl-CoA:carnitineCoA-transferase               | 0.46          | 0.37580 | 0.39          | 0.27983 | -0.21         | 0.67653 |
| STM0073         | caiA    | crotonobetainyl-CoA dehydrogenase                          | -0.19         | 0.77241 | -0.31         | 0.53139 | -0.79         | 0.48295 |
| STM0073         | caiA    | crotonobetainyl-CoA dehydrogenase                          | 0.56          | 0.18533 | 0.25          | 0.56616 | 0.00          | 0.99713 |
| STM0074         | caiT    | L-carnitine/gamma-butyrobetaine antiporter                 | -0.65         | 0.23325 | 0.39          | 0.63234 | -0.29         | 0.64856 |
| STM0074         | caiT    | L-carnitine/gamma-butyrobetaine antiporter                 | -0.89         | 0.48762 | -1.86         | 0.00203 | -0.82         | 0.14725 |
| STM0075         | fixA    | putative electron transfer flavoprotein subunit beta       | 0.73          | 0.22719 | 0.27          | 0.50308 | 0.32          | 0.59771 |
| STM0075         | fixA    | putative electron transfer flavoprotein subunit beta       | 1.58          | 0.14269 | 0.23          | 0.78809 | 2.13          | 0.00875 |
| STM0076         | fixB    | putative electron transfer flavoprotein subunit alpha      | -1.75         | 0.12773 | -1.58         | 0.04857 | -0.64         | 0.37862 |
| STM0076         | fixB    | putative electron transfer flavoprotein subunit alpha      | 0.80          | 0.18729 | -1.59         | 0.00577 | -0.65         | 0.42962 |
| STM0077         | fixC    | flavoprotein                                               | 0.89          | 0.21242 | -0.99         | 0.07104 | 0.47          | 0.47046 |
| STM0077         | fixC    | flavoprotein                                               | 1.23          | 0.05424 | -0.22         | 0.55100 | 1.51          | 0.01049 |
| STM0078         | fixX    | putative ferredoxin                                        | 0.88          | 0.48195 | 1.03          | 0.12011 | 1.46          | 0.01854 |
| STM0078         | fixX    | putative ferredoxin                                        | 1.97          | 0.08866 | -1.25         | 0.01081 | 0.31          | 0.76913 |
| STM0079         | yaaU    | putative transport protein                                 | 0.43          | 0.41983 | 0.29          | 0.40413 | 0.49          | 0.19913 |
| STM0079         | yaaU    | putative transport protein                                 | 1.71          | 0.14696 | -0.65         | 0.17629 | 1.20          | 0.01098 |
| STM0080         | STM0080 | putative outer membrane lipoprotein                        | 0.72          | 0.46194 | 1.23          | 0.00715 | 1.68          | 0.00292 |
| STM0080         | STM0080 | putative outer membrane lipoprotein                        | 1.98          | 0.06031 | -0.08         | 0.83611 | 2.88          | 0.00030 |

**Table S2.** Genome-wide expression of *Salmonella enterica* serovar Typhimurium inside fibroblasts

Intracellular WT 24 h p.i.      Intracellular *phoP* 24 h p.i.      Extracellular WT stationary phase

Relative to WT exponential LB      Relative to *phoP* exponential LB      Relative to WT exponential LB

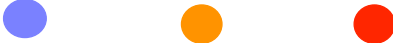

| Systematic name | Gene    | Product                                                 | log2Ratio (M) | p value | log2Ratio (M) | p value | log2Ratio (M) | p value |
|-----------------|---------|---------------------------------------------------------|---------------|---------|---------------|---------|---------------|---------|
| STM0081         | STM0081 | putative secreted protein                               | 1.80          | 0.02092 | 0.70          | 0.05058 | 1.03          | 0.05335 |
| STM0081         | STM0081 | putative secreted protein                               | 3.40          | 0.00547 | 0.72          | 0.06259 | 1.09          | 0.03182 |
| STM0082         | STM0082 | putative secreted protein                               | 0.52          | 0.45600 | 1.91          | 0.03948 | 0.46          | 0.30457 |
| STM0082         | STM0082 | putative secreted protein                               | 1.95          | 0.14379 | 0.55          | 0.20631 | 1.38          | 0.03937 |
| STM0084         | STM0084 | putative sulfatase                                      | -0.77         | 0.31810 | 0.42          | 0.43889 | -1.23         | 0.01511 |
| STM0084         | STM0084 | putative sulfatase                                      | 0.13          | 0.81488 | -0.32         | 0.30738 | -0.45         | 0.29026 |
| STM0085         | yabF    | glutathione-regulated potassium-efflux system ancillary | -1.09         | 0.06515 | -0.45         | 0.21424 | 0.49          | 0.26256 |
| STM0085         | yabF    | glutathione-regulated potassium-efflux system ancillary | -0.52         | 0.46474 | -1.00         | 0.05044 | 0.96          | 0.12083 |
| STM0086         | kefC    | glutathione-regulated potassium-efflux system protein   | 1.10          | 0.39268 | -1.45         | 0.00848 | -0.61         | 0.29443 |
| STM0086         | kefC    | glutathione-regulated potassium-efflux system protein   | 1.58          | 0.03542 | -1.14         | 0.03773 | -0.51         | 0.28469 |
| STM0087         | folA    | dihydrofolate reductase type I                          | 0.74          | 0.09758 | -0.12         | 0.73016 | -1.34         | 0.00750 |
| STM0087         | folA    | dihydrofolate reductase type I                          | 0.54          | 0.31133 | -0.05         | 0.88176 | -0.93         | 0.07373 |
| STM0088         | apaH    | diadenosinetetraphosphatase                             | -0.03         | 0.95350 | 0.06          | 0.87002 | -0.72         | 0.08439 |
| STM0088         | apaH    | diadenosinetetraphosphatase                             | 0.44          | 0.32853 | -0.03         | 0.92774 | -0.03         | 0.94140 |
| STM0089         | apaG    | hypothetical protein STM0089                            | -2.02         | 0.06218 | 0.39          | 0.30002 | -0.22         | 0.67188 |
| STM0089         | apaG    | hypothetical protein STM0089                            | -1.65         | 0.01827 | -0.29         | 0.46796 | -0.66         | 0.09243 |
| STM0090         | ksgA    | dimethyladenosine transferase                           | -2.64         | 0.00567 | -1.19         | 0.00667 | -1.20         | 0.01207 |
| STM0090         | ksgA    | dimethyladenosine transferase                           | -1.63         | 0.01993 | -0.69         | 0.05957 | -0.91         | 0.06178 |
| STM0091         | pdxA    | 4-hydroxythreonine-4-phosphate dehydrogenase            | -3.34         | 0.00947 | -2.10         | 0.00019 | -2.26         | 0.00039 |
| STM0091         | pdxA    | 4-hydroxythreonine-4-phosphate dehydrogenase            | -3.52         | 0.00547 | -2.09         | 0.00042 | -1.81         | 0.04647 |
| STM0092         | surA    | peptidyl-prolyl cis-trans isomerase                     | -2.57         | 0.01092 | -1.02         | 0.00765 | -3.42         | 0.00011 |
| STM0092         | surA    | peptidyl-prolyl cis-trans isomerase                     | -1.46         | 0.05313 | -1.34         | 0.00564 | -2.92         | 0.00010 |
| STM0093         | imp     | organic solvent tolerance protein precursor             | -1.96         | 0.01855 | -0.77         | 0.06119 | -1.88         | 0.00118 |
| STM0093         | imp     | organic solvent tolerance protein precursor             | -1.95         | 0.02226 | -0.81         | 0.02145 | -1.93         | 0.00075 |
| STM0094         | djlA    | Dna-J like membrane chaperone protein                   | 0.65          | 0.21114 | -0.24         | 0.46930 | 1.70          | 0.01491 |
| STM0094         | djlA    | Dna-J like membrane chaperone protein                   | 1.63          | 0.01534 | -0.18         | 0.64266 | 2.29          | 0.00270 |
| STM0095         | rluA    | 23S rRNA pseudouridylylate 746 synthase                 | -1.97         | 0.01123 | -0.68         | 0.04738 | -1.36         | 0.03579 |
| STM0095         | rluA    | 23S rRNA pseudouridylylate 746 synthase                 | 1.10          | 0.05101 | -0.10         | 0.84249 | 1.12          | 0.06059 |
| STM0096         | hepA    | ATP-dependent helicase HepA                             | -1.61         | 0.01494 | -1.39         | 0.00377 | -3.23         | 0.00040 |
| STM0096         | hepA    | ATP-dependent helicase HepA                             | -1.26         | 0.04091 | -1.20         | 0.00766 | -1.82         | 0.00364 |
| STM0097         | polB    | DNA polymerase II                                       | -1.34         | 0.13827 | -1.46         | 0.02763 | -0.45         | 0.21169 |
| STM0097         | polB    | DNA polymerase II                                       | 0.13          | 0.75456 | -1.28         | 0.00835 | 1.06          | 0.11222 |
| STM0098         | STM0098 | putative secreted protein                               | -0.51         | 0.38699 | -0.70         | 0.08758 | -1.41         | 0.01867 |
| STM0098         | STM0098 | putative secreted protein                               | 0.76          | 0.15745 | -0.02         | 0.94723 | 0.02          | 0.97519 |
| STM0100         | STM0100 | putative cytoplasmic protein                            | 0.42          | 0.45509 | 0.10          | 0.72185 | -0.64         | 0.18964 |
| STM0100         | STM0100 | putative cytoplasmic protein                            | 2.52          | 0.00817 | -0.04         | 0.88750 | 0.23          | 0.64428 |
| STM0101         | araD    | L-ribulose-5-phosphate 4-epimerase                      | 0.38          | 0.48253 | 1.32          | 0.01174 | 1.04          | 0.08506 |
| STM0101         | araD    | L-ribulose-5-phosphate 4-epimerase                      | 0.33          | 0.65552 | -0.09         | 0.83291 | 0.75          | 0.14173 |
| STM0102         | araA    | L-arabinose isomerase                                   | -0.32         | 0.70353 | 0.15          | 0.69520 | -0.77         | 0.12622 |
| STM0102         | araA    | L-arabinose isomerase                                   | 0.94          | 0.08196 | -0.68         | 0.04352 | 0.20          | 0.81672 |
| STM0103         | araB    | ribulokinase                                            | 1.80          | 0.03878 | 3.84          | 0.00021 | -0.08         | 0.92978 |
| STM0103         | araB    | ribulokinase                                            | 2.58          | 0.01808 | 3.52          | 0.00012 | 2.41          | 0.02447 |
| STM0104         | araC    | arabinose operon transcriptional regulator              | -0.24         | 0.59380 | 0.94          | 0.09980 | -0.42         | 0.27345 |
| STM0104         | araC    | arabinose operon transcriptional regulator              | 3.51          | 0.00547 | -0.09         | 0.84969 | 1.92          | 0.00608 |
| STM0105         | yabI    | hypothetical protein STM0105                            | -1.33         | 0.03523 | 0.02          | 0.96273 | -0.55         | 0.41742 |
| STM0105         | yabI    | hypothetical protein STM0105                            | -0.41         | 0.48837 | -0.22         | 0.63997 | -0.62         | 0.09769 |
| STM0106         | yabJ    | putative ABC transporter protein                        | -1.37         | 0.04570 | -0.11         | 0.78792 | -0.55         | 0.34746 |
| STM0106         | yabJ    | putative ABC transporter protein                        | 0.70          | 0.16246 | 0.21          | 0.45990 | -0.69         | 0.08660 |
| STM0107         | thiP    | thiamin ABC transporter membrane component              | 0.24          | 0.68187 | 0.53          | 0.11608 | 0.73          | 0.19688 |
| STM0107         | thiP    | thiamin ABC transporter membrane component              | -0.02         | 0.97845 | 0.03          | 0.95522 | 2.04          | 0.00237 |
| STM0108         | tbpA    | thiamine-binding periplasmic protein                    | -0.47         | 0.74114 | 0.81          | 0.03860 | -1.79         | 0.00592 |
| STM0108         | tbpA    | thiamine-binding periplasmic protein                    | 0.23          | 0.87190 | 0.82          | 0.02599 | -1.02         | 0.01609 |
| STM0109         | yabN    | putative periplasmic binding protein                    | -1.23         | 0.03518 | -0.18         | 0.66076 | -0.10         | 0.85499 |
| STM0109         | yabN    | putative periplasmic binding protein                    | -0.30         | 0.56128 | -0.38         | 0.26161 | -0.53         | 0.24122 |
| STM0110         | leuD    | isopropylmalate isomerase small subunit                 | -0.34         | 0.54963 | 0.72          | 0.09445 | -0.53         | 0.42989 |
| STM0110         | leuD    | isopropylmalate isomerase small subunit                 | -0.70         | 0.37875 | 0.28          | 0.35851 | -2.47         | 0.07998 |
| STM0111         | leuC    | isopropylmalate isomerase large subunit                 | 2.08          | 0.01562 | 1.12          | 0.01144 | -1.24         | 0.06251 |
| STM0111         | leuC    | isopropylmalate isomerase large subunit                 | 2.12          | 0.01001 | 0.57          | 0.10346 | 0.70          | 0.34548 |
| STM0112         | leuB    | 3-isopropylmalate dehydrogenase                         | -0.73         | 0.28577 | 0.74          | 0.02964 | -1.06         | 0.09933 |
| STM0112         | leuB    | 3-isopropylmalate dehydrogenase                         | -0.67         | 0.26495 | 0.80          | 0.03980 | -1.02         | 0.03910 |
| STM0113         | leuA    | 2-isopropylmalate synthase                              | 1.47          | 0.02729 | 2.00          | 0.00047 | 3.12          | 0.00018 |
| STM0113         | leuA    | 2-isopropylmalate synthase                              | 1.77          | 0.01479 | 2.00          | 0.00088 | 3.40          | 0.00007 |
| STM0115         | leuO    | leucine transcriptional activator                       | 0.27          | 0.57932 | -1.56         | 0.10443 | -0.49         | 0.42429 |
| STM0115         | leuO    | leucine transcriptional activator                       | 0.26          | 0.65987 | -1.74         | 0.01222 | -0.31         | 0.77401 |
| STM0116         | ilvI    | acetolactate synthase III large subunit                 | 1.28          | 0.06957 | 0.90          | 0.01313 | -0.77         | 0.15262 |
| STM0116         | ilvI    | acetolactate synthase III large subunit                 | 1.32          | 0.03161 | 0.82          | 0.04996 | 0.05          | 0.92588 |
| STM0117         | ilvH    | acetolactate synthase small subunit                     | -0.12         | 0.84406 | 0.20          | 0.57517 | -0.65         | 0.14243 |
| STM0117         | ilvH    | acetolactate synthase small subunit                     | 1.05          | 0.37870 | 0.17          | 0.58063 | 0.11          | 0.81731 |
| STM0118         | fruR    | fru operon transcriptional repressor                    | -1.35         | 0.11970 | -1.00         | 0.04758 | -0.87         | 0.18712 |
| STM0118         | fruR    | fru operon transcriptional repressor                    | -0.83         | 0.09202 | -1.35         | 0.02585 | -0.28         | 0.46519 |

**Table S2.** Genome-wide expression of *Salmonella enterica* serovar Typhimurium inside fibroblasts

Intracellular WT 24 h p.i.      Intracellular *phoP* 24 h p.i.      Extracellular WT stationary phase

Relative to WT exponential LB      Relative to *phoP* exponential LB      Relative to WT exponential LB



| Systematic name | Gene    | Product                                              | log2Ratio (M) | p value | log2Ratio (M) | p value | log2Ratio (M) | p value |
|-----------------|---------|------------------------------------------------------|---------------|---------|---------------|---------|---------------|---------|
| STM0119         | yabB    | hypothetical protein STM0119                         | -1.22         | 0.03367 | -0.58         | 0.11340 | -1.77         | 0.00115 |
| STM0119         | yabB    | hypothetical protein STM0119                         | -0.94         | 0.06238 | -0.43         | 0.24520 | -1.39         | 0.01188 |
| STM0120         | mraW    | S-adenosyl-methyltransferase                         | -1.34         | 0.03984 | -0.65         | 0.06197 | -1.07         | 0.02821 |
| STM0120         | mraW    | S-adenosyl-methyltransferase                         | -0.98         | 0.05490 | -0.18         | 0.58785 | -0.56         | 0.14446 |
| STM0121         | ftsL    | cell division protein                                | -1.24         | 0.17600 | -0.52         | 0.12338 | -0.94         | 0.02714 |
| STM0121         | ftsL    | cell division protein                                | -0.01         | 0.99747 | -0.79         | 0.01940 | 0.08          | 0.88312 |
| STM0122         | ftsI    | division specific transpeptidase                     | -0.09         | 0.88701 | -1.07         | 0.01854 | -0.39         | 0.37697 |
| STM0122         | ftsI    | division specific transpeptidase                     | 0.90          | 0.20602 | -1.17         | 0.00841 | 0.00          | 0.99713 |
| STM0123         | murE    | UDP-N-acetylmuramoyl-L-alanyl-D-glutamate--2,6-      | -2.65         | 0.00547 | -2.15         | 0.00037 | -3.15         | 0.00011 |
| STM0123         | murE    | UDP-N-acetylmuramoyl-L-alanyl-D-glutamate--2,6-      | -1.91         | 0.01479 | -2.25         | 0.00038 | -2.76         | 0.00031 |
| STM0124         | murF    | D-alanine-D-alanine ligase                           | -2.54         | 0.00796 | -2.56         | 0.00079 | -2.98         | 0.00099 |
| STM0124         | murF    | D-alanine-D-alanine ligase                           | -2.51         | 0.00811 | -2.53         | 0.00019 | -4.46         | 0.00509 |
| STM0125         | mraY    | phospho-N-acetylmuramoyl-pentapeptide-transferase    | -1.68         | 0.03792 | -2.24         | 0.00028 | -3.27         | 0.00011 |
| STM0125         | mraY    | phospho-N-acetylmuramoyl-pentapeptide-transferase    | -1.64         | 0.02137 | -2.17         | 0.00049 | -2.01         | 0.00316 |
| STM0126         | murD    | UDP-N-acetylmuramoyl-L-alanyl-D-glutamate synthetase | -0.10         | 0.95303 | -0.32         | 0.58425 | -1.44         | 0.00635 |
| STM0126         | murD    | UDP-N-acetylmuramoyl-L-alanyl-D-glutamate synthetase | -1.15         | 0.14806 | -1.56         | 0.00150 | -1.89         | 0.01488 |
| STM0127         | ftsW    | essential cell division gene                         | -1.91         | 0.00921 | -1.82         | 0.00050 | -1.90         | 0.00134 |
| STM0127         | ftsW    | essential cell division gene                         | -2.65         | 0.02148 | -2.07         | 0.00022 | -1.89         | 0.00106 |
| STM0128         | murG    | N-acetylglucosaminyl transferase                     | -2.37         | 0.00900 | -1.57         | 0.00150 | -1.34         | 0.04650 |
| STM0128         | murG    | N-acetylglucosaminyl transferase                     | -2.25         | 0.01052 | -1.61         | 0.00060 | -2.16         | 0.00839 |
| STM0129         | murC    | UDP-N-acetylmuramate--L-alanine ligase               | -2.89         | 0.02069 | -1.87         | 0.00035 | -2.47         | 0.00032 |
| STM0129         | murC    | UDP-N-acetylmuramate--L-alanine ligase               | -2.00         | 0.00831 | -1.43         | 0.00218 | -2.42         | 0.00021 |
| STM0130         | ddl     | D-alanylalanine synthetase                           | -2.37         | 0.00753 | -0.68         | 0.04334 | -2.23         | 0.00219 |
| STM0130         | ddl     | D-alanylalanine synthetase                           | -0.92         | 0.18246 | -0.30         | 0.40176 | -2.57         | 0.00019 |
| STM0131         | ftsQ    | cell division protein                                | -0.62         | 0.45920 | -0.01         | 0.97867 | -2.83         | 0.00015 |
| STM0131         | ftsQ    | cell division protein                                | 0.37          | 0.46250 | 0.19          | 0.53261 | -1.75         | 0.00352 |
| STM0132         | ftsA    | cell division protein                                | -2.31         | 0.02665 | -0.21         | 0.44586 | -2.36         | 0.00038 |
| STM0132         | ftsA    | cell division protein                                | -0.61         | 0.17603 | -0.42         | 0.16069 | -1.62         | 0.00294 |
| STM0133         | ftsZ    | cell division protein FtsZ                           | -1.90         | 0.02603 | 0.35          | 0.37251 | -2.15         | 0.00038 |
| STM0133         | ftsZ    | cell division protein FtsZ                           | -1.12         | 0.07292 | 0.33          | 0.27061 | -2.35         | 0.00158 |
| STM0134         | lpxC    | UDP-3-O-                                             | -1.15         | 0.03211 | 1.37          | 0.00185 | 1.35          | 0.00506 |
| STM0134         | lpxC    | UDP-3-O-                                             | -0.27         | 0.56888 | 1.16          | 0.00325 | 1.61          | 0.00251 |
| STM0135         | yacA    | SecA regulator SecM                                  | -1.19         | 0.04632 | -1.07         | 0.06327 | -1.00         | 0.01623 |
| STM0135         | yacA    | SecA regulator SecM                                  | -0.89         | 0.18641 | -0.93         | 0.01883 | -1.05         | 0.03581 |
| STM0136         | secA    | translocase                                          | -1.01         | 0.06312 | -0.99         | 0.00862 | -2.00         | 0.00203 |
| STM0136         | secA    | translocase                                          | -0.05         | 0.93930 | -0.34         | 0.26328 | -0.70         | 0.12099 |
| STM0137         | mutT    | 7,8-dihydro-8-oxoguanine-triphosphatase              | -1.42         | 0.02162 | -0.26         | 0.52576 | -1.26         | 0.08762 |
| STM0137         | mutT    | 7,8-dihydro-8-oxoguanine-triphosphatase              | -0.13         | 0.82377 | -0.80         | 0.05036 | -1.33         | 0.10743 |
| STM0138         | yacG    | zinc-binding protein                                 | -0.97         | 0.06283 | -0.68         | 0.07960 | -1.00         | 0.02907 |
| STM0138         | yacG    | zinc-binding protein                                 | -0.18         | 0.66459 | -0.95         | 0.01921 | -0.39         | 0.39507 |
| STM0139         | yacF    | hypothetical protein STM0139                         | -1.37         | 0.02040 | -1.07         | 0.01548 | -1.48         | 0.01135 |
| STM0139         | yacF    | hypothetical protein STM0139                         | -0.30         | 0.45568 | -1.07         | 0.01094 | -1.52         | 0.01089 |
| STM0140         | coaE    | dephospho-CoA kinase                                 | -1.17         | 0.11448 | -0.86         | 0.09063 | -2.33         | 0.00034 |
| STM0140         | coaE    | dephospho-CoA kinase                                 | -0.51         | 0.34231 | -0.28         | 0.39983 | -1.32         | 0.01208 |
| STM0141         | guaC    | guanosine 5'-monophosphate oxidoreductase            | -1.16         | 0.07767 | -0.06         | 0.87834 | -0.15         | 0.76776 |
| STM0141         | guaC    | guanosine 5'-monophosphate oxidoreductase            | -0.41         | 0.52984 | -0.12         | 0.67712 | 0.44          | 0.42591 |
| STM0142         | hofC    | putative type IV pilin assembly protein              | -1.69         | 0.02148 | -0.95         | 0.09738 | -0.95         | 0.09115 |
| STM0142         | hofC    | putative type IV pilin assembly protein              | -0.96         | 0.14835 | -0.26         | 0.42709 | -1.68         | 0.00264 |
| STM0143         | hofB    | putative type IV fimbrial biosynthetic protein       | -0.17         | 0.74962 | -1.50         | 0.00095 | -0.91         | 0.35583 |
| STM0143         | hofB    | putative type IV fimbrial biosynthetic protein       | 2.08          | 0.01065 | 0.37          | 0.25016 | -0.58         | 0.34871 |
| STM0144         | ppdD    | putative type IV pilin major component               | 0.53          | 0.33606 | -0.80         | 0.02173 | -1.27         | 0.12729 |
| STM0144         | ppdD    | putative type IV pilin major component               | 0.46          | 0.29520 | 0.02          | 0.95835 | -0.38         | 0.56516 |
| STM0145         | nadC    | nicotinate-nucleotide pyrophosphorylase              | -0.64         | 0.23453 | -0.75         | 0.06488 | -0.22         | 0.66979 |
| STM0145         | nadC    | nicotinate-nucleotide pyrophosphorylase              | -0.25         | 0.61931 | -0.73         | 0.06480 | -0.21         | 0.64347 |
| STM0146         | ampD    | N-acetyl-anhydromuramyl-L-alanine amidase            | -0.35         | 0.43030 | 0.84          | 0.03795 | -0.30         | 0.38880 |
| STM0146         | ampD    | N-acetyl-anhydromuramyl-L-alanine amidase            | 0.21          | 0.64076 | 0.90          | 0.04557 | -0.09         | 0.87760 |
| STM0147         | ampE    | putative beta lactamase regulator                    | -0.32         | 0.67877 | 0.27          | 0.35540 | -0.20         | 0.78649 |
| STM0147         | ampE    | putative beta lactamase regulator                    | -0.06         | 0.88801 | 0.62          | 0.05201 | -0.59         | 0.13616 |
| STM0148         | STM0148 | putative cytoplasmic protein                         | -0.19         | 0.65904 | 0.37          | 0.17725 | 0.13          | 0.81762 |
| STM0148         | STM0148 | putative cytoplasmic protein                         | -0.53         | 0.24565 | -0.83         | 0.06542 | 0.47          | 0.51676 |
| STM0149         | STM0149 | Na+/galactoside symporter                            | 0.95          | 0.07167 | 0.55          | 0.09014 | -0.85         | 0.18172 |
| STM0149         | STM0149 | Na+/galactoside symporter                            | 1.54          | 0.04119 | -0.32         | 0.52204 | 0.90          | 0.04855 |
| STM0150         | aroP    | aromatic amino acid transporter                      | 0.51          | 0.62330 | -0.60         | 0.11575 | -0.31         | 0.36039 |
| STM0150         | aroP    | aromatic amino acid transporter                      | 0.89          | 0.22132 | -0.86         | 0.03576 | 0.31          | 0.39826 |
| STM0151         | pdhR    | transcriptional regulator of pyruvate dehydrogenase  | -1.93         | 0.01497 | -1.36         | 0.00130 | -3.09         | 0.00010 |
| STM0151         | pdhR    | transcriptional regulator of pyruvate dehydrogenase  | -0.48         | 0.48976 | -0.77         | 0.02173 | -2.50         | 0.00165 |
| STM0152         | aceE    | pyruvate dehydrogenase E1 component                  | -3.66         | 0.01611 | -0.71         | 0.05077 | -2.64         | 0.01633 |
| STM0152         | aceE    | pyruvate dehydrogenase E1 component                  | -2.30         | 0.00947 | -0.43         | 0.29102 | -3.06         | 0.00011 |
| STM0153         | aceF    | dihydrolipoamide acetyltransferase                   | -2.97         | 0.02399 | -2.15         | 0.00103 | -3.19         | 0.00010 |
| STM0153         | aceF    | dihydrolipoamide acetyltransferase                   | -2.82         | 0.06375 | -1.51         | 0.01367 | -4.58         | 0.00141 |

**Table S2.** Genome-wide expression of *Salmonella enterica* serovar Typhimurium inside fibroblasts

| Systematic name | Gene    | Product                                             | log2Ratio (M) | p value | log2Ratio (M) | p value | log2Ratio (M) | p value |
|-----------------|---------|-----------------------------------------------------|---------------|---------|---------------|---------|---------------|---------|
| STM0154         | lpdA    | dihydrolipoamide dehydrogenase                      | -3.28         | 0.00541 | -0.85         | 0.01565 | -3.35         | 0.00030 |
| STM0154         | lpdA    | dihydrolipoamide dehydrogenase                      | -2.62         | 0.01590 | -0.64         | 0.06067 | -2.72         | 0.00015 |
| STM0155         | STM0155 | putative outer membrane protein                     | -0.78         | 0.24824 | -1.68         | 0.00112 | -2.03         | 0.00143 |
| STM0155         | STM0155 | putative outer membrane protein                     | 0.41          | 0.60635 | -1.74         | 0.00306 | -1.02         | 0.01698 |
| STM0156         | STM0156 | putative periplasmic protein                        | -1.57         | 0.01635 | -1.34         | 0.00817 | -1.54         | 0.00764 |
| STM0156         | STM0156 | putative periplasmic protein                        | -0.14         | 0.76088 | -1.74         | 0.00052 | -1.38         | 0.00522 |
| STM0157         | yacH    | putative outer membrane protein                     | -1.64         | 0.03224 | -0.53         | 0.11422 | -1.77         | 0.01277 |
| STM0157         | yacH    | putative outer membrane protein                     | -1.50         | 0.03865 | -2.30         | 0.02309 | -1.84         | 0.00197 |
| STM0158         | acnB    | aconitate hydratase                                 | -1.19         | 0.03235 | -0.38         | 0.24036 | -1.07         | 0.01726 |
| STM0158         | acnB    | aconitate hydratase                                 | -1.10         | 0.07086 | -0.29         | 0.35851 | -0.77         | 0.12743 |
| STM0159         | STM0159 | putative restriction endonuclease                   | 1.82          | 0.02971 | 1.32          | 0.00473 | 3.59          | 0.00008 |
| STM0159         | STM0159 | putative restriction endonuclease                   | 2.06          | 0.02560 | 0.41          | 0.17739 | 3.96          | 0.00014 |
| STM0160         | yacL    | hypothetical protein STM0160                        | 0.78          | 0.10129 | -0.69         | 0.12094 | -0.13         | 0.74336 |
| STM0160         | yacL    | hypothetical protein STM0160                        | 0.12          | 0.80084 | -0.59         | 0.18238 | -0.39         | 0.60097 |
| STM0161         | kdgT    | 2-keto-3-deoxygluconate permease                    | 1.75          | 0.04701 | -0.33         | 0.43348 | 0.71          | 0.19326 |
| STM0161         | kdgT    | 2-keto-3-deoxygluconate permease                    | 2.11          | 0.02172 | 0.25          | 0.54004 | 1.22          | 0.01058 |
| STM0162         | STM0162 | putative inner membrane protein                     | 0.24          | 0.82987 | 0.05          | 0.90971 | -0.31         | 0.37157 |
| STM0162         | STM0162 | putative inner membrane protein                     | 1.33          | 0.03242 | 0.06          | 0.90798 | 0.65          | 0.15954 |
| STM0163         | STM0163 | 4-hydroxythreonine-4-phosphate dehydrogenase        | -0.28         | 0.55339 | 0.40          | 0.24417 | 1.16          | 0.01609 |
| STM0163         | STM0163 | 4-hydroxythreonine-4-phosphate dehydrogenase        | 0.51          | 0.35321 | -0.20         | 0.52190 | 2.15          | 0.09216 |
| STM0164         | STM0164 | putative transcriptional regulator                  | -1.05         | 0.05741 | -0.67         | 0.06025 | -1.86         | 0.00225 |
| STM0164         | STM0164 | putative transcriptional regulator                  | -1.71         | 0.03861 | -0.61         | 0.07259 | -1.42         | 0.00806 |
| STM0165         | speD    | S-adenosylmethionine decarboxylase proenzyme        | -1.97         | 0.01172 | -1.04         | 0.02692 | -1.74         | 0.02647 |
| STM0165         | speD    | S-adenosylmethionine decarboxylase proenzyme        | -0.70         | 0.20638 | -1.54         | 0.00269 | -1.97         | 0.01056 |
| STM0166         | speE    | spermidine synthase                                 | -4.00         | 0.00512 | -2.52         | 0.00043 | -5.00         | 0.00002 |
| STM0166         | speE    | spermidine synthase                                 | -3.83         | 0.02059 | -2.19         | 0.00019 | -5.24         | 0.00243 |
| STM0167         | yacC    | putative periplasmic protein                        | -1.57         | 0.02011 | -1.04         | 0.00961 | -2.97         | 0.00111 |
| STM0167         | yacC    | putative periplasmic protein                        | -1.16         | 0.04785 | -0.23         | 0.78932 | -1.67         | 0.01104 |
| STM0168         | cueO    | putative multicopper oxidase                        | -0.22         | 0.61744 | 0.99          | 0.01561 | 0.25          | 0.55906 |
| STM0168         | cueO    | putative multicopper oxidase                        | -0.19         | 0.67877 | 0.51          | 0.10235 | 0.56          | 0.19002 |
| STM0169         | gcd     | glucose dehydrogenase                               | -0.12         | 0.86951 | 1.14          | 0.00358 | -0.05         | 0.96795 |
| STM0169         | gcd     | glucose dehydrogenase                               | 0.53          | 0.32685 | 1.13          | 0.00744 | 0.20          | 0.83162 |
| STM0170         | hpt     | hypoxanthine-guanine phosphoribosyltransferase      | -2.32         | 0.00991 | -0.06         | 0.90120 | -2.99         | 0.00011 |
| STM0170         | hpt     | hypoxanthine-guanine phosphoribosyltransferase      | -1.55         | 0.01706 | 0.18          | 0.58832 | -2.59         | 0.00026 |
| STM0171         | yadF    | putative carbonic anhydrase                         | 1.19          | 0.67671 | 0.83          | 0.03824 | 2.11          | 0.01446 |
| STM0171         | yadF    | putative carbonic anhydrase                         | 1.76          | 0.01258 | 1.18          | 0.00622 | 1.33          | 0.16994 |
| STM0172         | yadG    | putative ABC-type multidrug transport system ATPase | -0.67         | 0.15766 | -1.17         | 0.29909 | -0.62         | 0.43077 |
| STM0172         | yadG    | putative ABC-type multidrug transport system ATPase | -0.26         | 0.67884 | -0.43         | 0.27790 | -1.08         | 0.12296 |
| STM0173         | yadH    | putative transport protein                          | 1.78          | 0.01352 | -0.71         | 0.03178 | -0.26         | 0.56146 |
| STM0173         | yadH    | putative transport protein                          | 0.60          | 0.19382 | -0.85         | 0.07643 | -0.70         | 0.19060 |
| STM0174         | stiH    | putative fimbrial protein precursor                 | 1.28          | 0.03103 | -0.18         | 0.51273 | -0.69         | 0.14679 |
| STM0174         | stiH    | putative fimbrial protein precursor                 | 1.26          | 0.06896 | -0.49         | 0.26981 | 0.50          | 0.29649 |
| STM0175         | stiC    | putative fimbrial usher                             | -0.03         | 0.95651 | 0.89          | 0.07341 | 0.59          | 0.20316 |
| STM0175         | stiC    | putative fimbrial usher                             | 1.16          | 0.09686 | -0.64         | 0.11229 | 0.03          | 0.98468 |
| STM0176         | stiB    | putative fimbrial chaparone                         | 0.57          | 0.40903 | 1.13          | 0.15696 | 1.73          | 0.10063 |
| STM0176         | stiB    | putative fimbrial chaparone                         | 0.17          | 0.76997 | -0.81         | 0.22561 | 0.16          | 0.83198 |
| STM0177         | stiA    | putative fimbrial subunit                           | -0.52         | 0.40679 | -0.79         | 0.12586 | -0.33         | 0.72911 |
| STM0177         | stiA    | putative fimbrial subunit                           | -0.96         | 0.20600 | -1.21         | 0.00297 | -0.20         | 0.60043 |
| STM0178         | yadI    | putative PTS enzyme                                 | -0.60         | 0.19506 | 0.63          | 0.14178 | 1.25          | 0.05716 |
| STM0178         | yadI    | putative PTS enzyme                                 | 0.28          | 0.50886 | 0.30          | 0.56098 | 2.50          | 0.01387 |
| STM0179         | yadE    | putative xylanase/chitin deacetylase                | -1.34         | 0.02615 | -0.65         | 0.06862 | -1.56         | 0.00557 |
| STM0179         | yadE    | putative xylanase/chitin deacetylase                | -0.16         | 0.74536 | 0.01          | 0.97910 | -1.42         | 0.01304 |
| STM0180         | panD    | aspartate 1-decarboxylase precursor                 | -0.85         | 0.13019 | -0.12         | 0.75336 | -0.77         | 0.11787 |
| STM0180         | panD    | aspartate 1-decarboxylase precursor                 | -0.45         | 0.29048 | 0.05          | 0.92069 | 0.58          | 0.14561 |
| STM0181         | panC    | pantoate--beta-alanine ligase                       | -1.92         | 0.01425 | -1.54         | 0.00278 | -2.95         | 0.00032 |
| STM0181         | panC    | pantoate--beta-alanine ligase                       | -1.78         | 0.05049 | -1.18         | 0.00456 | -2.13         | 0.01726 |
| STM0182         | panB    | 3-methyl-2-oxobutanoate hydroxymethyltransferase    | -1.47         | 0.01595 | -1.44         | 0.00188 | -1.12         | 0.04977 |
| STM0182         | panB    | 3-methyl-2-oxobutanoate hydroxymethyltransferase    | -1.00         | 0.10554 | -1.20         | 0.00594 | -1.65         | 0.02833 |
| STM0183         | folK    | 7,8-dihydro-6-hydroxymethylpterin-pyrophosphokinase | -2.06         | 0.02980 | -1.31         | 0.01651 | -1.07         | 0.03085 |
| STM0183         | folK    | 7,8-dihydro-6-hydroxymethylpterin-pyrophosphokinase | -0.82         | 0.38100 | -1.30         | 0.00237 | -1.21         | 0.04854 |
| STM0184         | pcnB    | polyA polymerase I                                  | -2.34         | 0.01066 | -1.29         | 0.00388 | -3.86         | 0.00033 |
| STM0184         | pcnB    | polyA polymerase I                                  | -1.20         | 0.07564 | -1.32         | 0.00222 | -3.76         | 0.00010 |
| STM0185         | yadB    | glutamyl-tRNA synthetase                            | -1.56         | 0.02373 | -1.69         | 0.00145 | -1.61         | 0.00656 |
| STM0185         | yadB    | glutamyl-tRNA synthetase                            | -0.59         | 0.25571 | -0.75         | 0.03937 | -1.50         | 0.01863 |
| STM0186         | dksA    | dnaK suppressor protein                             | -1.61         | 0.01938 | -0.87         | 0.03384 | -0.29         | 0.50292 |
| STM0186         | dksA    | dnaK suppressor protein                             | -0.47         | 0.25658 | -0.08         | 0.81896 | -0.36         | 0.34588 |
| STM0187         | sfsA    | sugar fermentation stimulation protein              | -1.19         | 0.10582 | 0.35          | 0.28541 | 3.06          | 0.00011 |
| STM0187         | sfsA    | sugar fermentation stimulation protein              | -1.23         | 0.15305 | 0.23          | 0.45813 | 3.57          | 0.00006 |
| STM0188         | ligT    | 2'-5' RNA ligase                                    | -1.59         | 0.01570 | -0.79         | 0.04928 | -0.93         | 0.03094 |
| STM0188         | ligT    | 2'-5' RNA ligase                                    | -1.65         | 0.01666 | -0.91         | 0.01115 | -1.06         | 0.02320 |

**Table S2.** Genome-wide expression of *Salmonella enterica* serovar Typhimurium inside fibroblasts

Intracellular WT 24 h p.i.      Intracellular *phoP* 24 h p.i.      Extracellular WT stationary phase

Relative to WT exponential LB      Relative to *phoP* exponential LB      Relative to WT exponential LB



| Systematic name | Gene    | Product                                               | log2Ratio (M) | p value | log2Ratio (M) | p value | log2Ratio (M) | p value |
|-----------------|---------|-------------------------------------------------------|---------------|---------|---------------|---------|---------------|---------|
| STM0189         | hrpB    | ATP-dependent helicase                                | -0.91         | 0.11322 | -0.22         | 0.75947 | -2.14         | 0.00150 |
| STM0189         | hrpB    | ATP-dependent helicase                                | 0.22          | 0.61452 | -0.49         | 0.16310 | -1.11         | 0.01225 |
| STM0190         | mrcB    | penicillin-binding protein 1b                         | -1.70         | 0.05095 | -0.83         | 0.02640 | -2.18         | 0.00194 |
| STM0190         | mrcB    | penicillin-binding protein 1b                         | -0.52         | 0.46574 | -0.25         | 0.45112 | -1.57         | 0.00410 |
| STM0191         | fhuA    | outer membrane ferrichrome receptor protein precursor | -2.24         | 0.02265 | -0.27         | 0.34266 | -0.93         | 0.02441 |
| STM0191         | fhuA    | outer membrane ferrichrome receptor protein precursor | -2.60         | 0.02102 | -0.50         | 0.10365 | -1.33         | 0.00590 |
| STM0192         | fhuC    | hydroxymate-dependent iron transport protein          | -1.32         | 0.02226 | -0.59         | 0.15673 | -2.05         | 0.00073 |
| STM0192         | fhuC    | hydroxymate-dependent iron transport protein          | -0.20         | 0.63219 | -0.86         | 0.03935 | -1.09         | 0.03404 |
| STM0193         | fhuD    | hydroxamate-dependent iron uptake protein             | -1.37         | 0.03561 | -1.42         | 0.00258 | -3.33         | 0.00011 |
| STM0193         | fhuD    | hydroxamate-dependent iron uptake protein             | -0.86         | 0.14703 | -1.20         | 0.00258 | -1.58         | 0.05979 |
| STM0194         | fhuB    | hydroxamate-dependent iron uptake protein             | -1.69         | 0.02148 | -1.38         | 0.01249 | -0.38         | 0.47144 |
| STM0194         | fhuB    | hydroxamate-dependent iron uptake protein             | -0.65         | 0.40479 | -1.38         | 0.00190 | -1.41         | 0.00710 |
| STM0195         | stfA    | putative fimbrial subunit                             | 0.71          | 0.36404 | 0.79          | 0.11438 | -0.32         | 0.60398 |
| STM0195         | stfA    | putative fimbrial subunit                             | 1.85          | 0.07952 | 0.31          | 0.28832 | -0.40         | 0.36764 |
| STM0196         | stfC    | putative fimbrial outer membrane usher                | -0.02         | 0.97596 | -0.83         | 0.15376 | -0.90         | 0.03405 |
| STM0196         | stfC    | putative fimbrial outer membrane usher                | 0.11          | 0.81851 | -1.23         | 0.01079 | -0.14         | 0.78971 |
| STM0197         | stfD    | putative periplasmic fimbrial chaperone               | -0.45         | 0.49833 | 1.33          | 0.05774 | -0.89         | 0.15014 |
| STM0197         | stfD    | putative periplasmic fimbrial chaperone               | 2.21          | 0.00864 | 0.63          | 0.03937 | 0.66          | 0.21277 |
| STM0198         | stfE    | putative minor fimbrial subunit                       | -0.35         | 0.46437 | -0.22         | 0.63116 | -0.50         | 0.51121 |
| STM0198         | stfE    | putative minor fimbrial subunit                       | -0.51         | 0.74253 | -0.01         | 0.98193 | 0.78          | 0.22642 |
| STM0199         | stfF    | putative minor fimbrial subunit                       | 0.62          | 0.39267 | 0.37          | 0.33353 | -0.07         | 0.91311 |
| STM0199         | stfF    | putative minor fimbrial subunit                       | 1.54          | 0.09659 | -1.03         | 0.01044 | 2.51          | 0.02535 |
| STM0200         | stfG    | putative minor fimbrial subunit                       | -1.11         | 0.13857 | -1.64         | 0.00128 | -1.53         | 0.01161 |
| STM0200         | stfG    | putative minor fimbrial subunit                       | -0.86         | 0.35224 | -1.14         | 0.00882 | -0.72         | 0.26344 |
| STM0201         | STM0201 | putative outer membrane protein                       | -1.22         | 0.05376 | -1.21         | 0.00844 | -0.59         | 0.21063 |
| STM0201         | STM0201 | putative outer membrane protein                       | -0.39         | 0.36919 | -0.71         | 0.04318 | 0.06          | 0.89430 |
| STM0202         | hemL    | glutamate-1-semialdehyde aminotransferase             | -0.81         | 0.10662 | -1.16         | 0.01119 | -1.79         | 0.00181 |
| STM0202         | hemL    | glutamate-1-semialdehyde aminotransferase             | -0.69         | 0.12844 | -1.16         | 0.02372 | -0.90         | 0.03658 |
| STM0203         | yadQ    | chloride channel protein                              | -0.77         | 0.19312 | -0.03         | 0.92477 | -0.61         | 0.19128 |
| STM0203         | yadQ    | chloride channel protein                              | 0.54          | 0.37178 | -0.45         | 0.13873 | -0.40         | 0.36342 |
| STM0204,S       | yadR    | hypothetical protein STM0204,S                        | -1.91         | 0.03141 | -0.15         | 0.62142 | -1.52         | 0.00282 |
| STM0204,S       | yadR    | hypothetical protein STM0204,S                        | -1.80         | 0.12446 | -0.22         | 0.46641 | -2.21         | 0.03996 |
| STM0205         | yadS    | putative inner membrane protein                       | -0.39         | 0.49575 | 1.00          | 0.01160 | -2.19         | 0.00056 |
| STM0205         | yadS    | putative inner membrane protein                       | 0.35          | 0.46968 | 0.91          | 0.03141 | -1.69         | 0.01052 |
| STM0206         | btuF    | vitamin B12-transporter protein BtuF                  | -1.03         | 0.06605 | -0.08         | 0.79854 | -1.72         | 0.00377 |
| STM0206         | btuF    | vitamin B12-transporter protein BtuF                  | -0.36         | 0.53945 | 0.27          | 0.35862 | -2.03         | 0.00391 |
| STM0207         | pfs     | 5'-methylthioadenosine/S-adenosylhomocysteine         | -1.50         | 0.02443 | -0.15         | 0.64878 | -2.52         | 0.00046 |
| STM0207         | pfs     | 5'-methylthioadenosine/S-adenosylhomocysteine         | -0.65         | 0.27146 | -0.38         | 0.29361 | -1.23         | 0.00850 |
| STM0208         | dgt     | deoxyguanosinetriphosphate triphosphohydrolase        | -0.88         | 0.17613 | 0.68          | 0.14116 | -0.87         | 0.11740 |
| STM0208         | dgt     | deoxyguanosinetriphosphate triphosphohydrolase        | 0.60          | 0.35386 | 0.63          | 0.09727 | -0.17         | 0.79673 |
| STM0209         | htrA    | high temperature requirement A protein precursor      | -0.45         | 0.61992 | 1.88          | 0.00297 | 0.69          | 0.06469 |
| STM0209         | htrA    | high temperature requirement A protein precursor      | 0.33          | 0.46383 | 2.01          | 0.00110 | 0.53          | 0.21919 |
| STM0210         | cdaR    | putative inner membrane protein                       | -0.42         | 0.44585 | 1.39          | 0.00176 | 0.85          | 0.05323 |
| STM0210         | cdaR    | putative inner membrane protein                       | 0.34          | 0.65270 | 1.36          | 0.00989 | 1.24          | 0.01261 |
| STM0211         | yaeH    | putative cytoplasmic protein                          | -0.77         | 0.15577 | 0.62          | 0.14317 | 0.68          | 0.13431 |
| STM0211         | yaeH    | putative cytoplasmic protein                          | 0.18          | 0.86042 | 0.92          | 0.01071 | 1.56          | 0.01420 |
| STM0212         | STM0212 | putative inner membrane protein                       | -1.63         | 0.04594 | -0.21         | 0.45642 | -0.66         | 0.07640 |
| STM0212         | STM0212 | putative inner membrane protein                       | -0.68         | 0.14494 | 0.05          | 0.90159 | -0.34         | 0.36764 |
| STM0213         | dapD    | 2,3,4,5-tetrahydropyridine-2-carboxylate N-           | -0.84         | 0.16295 | 0.86          | 0.02520 | -1.05         | 0.02617 |
| STM0213         | dapD    | 2,3,4,5-tetrahydropyridine-2-carboxylate N-           | -0.45         | 0.57963 | 1.11          | 0.01129 | -0.39         | 0.31440 |
| STM0214         | glnD    | PII uridylyl-transferase                              | -1.98         | 0.00889 | -0.29         | 0.69989 | -1.24         | 0.01101 |
| STM0214         | glnD    | PII uridylyl-transferase                              | -0.39         | 0.78379 | -0.95         | 0.02042 | -3.55         | 0.00433 |
| STM0215         | map     | methionine aminopeptidase                             | -2.62         | 0.00757 | -0.61         | 0.04476 | -2.01         | 0.00278 |
| STM0215         | map     | methionine aminopeptidase                             | -0.04         | 0.96628 | -0.14         | 0.61464 | -0.77         | 0.06361 |
| STM0216         | rpsB    | 30S ribosomal protein S2                              | -2.62         | 0.00750 | -0.84         | 0.05990 | -4.09         | 0.00011 |
| STM0216         | rpsB    | 30S ribosomal protein S2                              | -1.78         | 0.02836 | -1.18         | 0.02550 | -5.33         | 0.00002 |
| STM0217         | tsf     | elongation factor Ts                                  | -2.78         | 0.00547 | -1.44         | 0.01198 | -4.49         | 0.00003 |
| STM0217         | tsf     | elongation factor Ts                                  | -1.50         | 0.02347 | -1.19         | 0.01338 | -3.89         | 0.00004 |
| STM0218         | pyrH    | uridylyl kinase                                       | -2.57         | 0.09231 | -0.72         | 0.07513 | -0.22         | 0.59391 |
| STM0218         | pyrH    | uridylyl kinase                                       | -0.33         | 0.80696 | -2.41         | 0.00076 | -0.70         | 0.06997 |
| STM0219         | frr     | ribosome releasing factor                             | -1.96         | 0.00955 | -0.27         | 0.33908 | -1.37         | 0.00486 |
| STM0219         | frr     | ribosome releasing factor                             | -1.34         | 0.03176 | -0.29         | 0.41231 | -0.93         | 0.09859 |
| STM0220         | dxr     | 1-deoxy-D-xylulose 5-phosphate reductoisomerase       | -2.34         | 0.00755 | -1.68         | 0.00096 | -2.01         | 0.00182 |
| STM0220         | dxr     | 1-deoxy-D-xylulose 5-phosphate reductoisomerase       | -1.46         | 0.02172 | -1.20         | 0.00528 | -2.26         | 0.00226 |
| STM0221         | uppS    | undecaprenyl pyrophosphate synthetase                 | -2.15         | 0.00717 | -1.03         | 0.01669 | -2.30         | 0.00040 |
| STM0221         | uppS    | undecaprenyl pyrophosphate synthetase                 | -0.91         | 0.10631 | -1.15         | 0.01305 | -2.43         | 0.00069 |
| STM0222         | cdsA    | CDP-diglyceride synthase                              | -0.05         | 0.97440 | -1.06         | 0.00871 | -2.27         | 0.00082 |
| STM0222         | cdsA    | CDP-diglyceride synthase                              | -1.77         | 0.01562 | -0.71         | 0.05282 | -1.44         | 0.04339 |
| STM0223         | yaeL    | putative membrane-associated Zn-dependent protease    | -0.76         | 0.13363 | -0.51         | 0.15324 | -1.49         | 0.00449 |
| STM0223         | yaeL    | putative membrane-associated Zn-dependent protease    | -0.62         | 0.61663 | -0.74         | 0.02107 | -1.92         | 0.00118 |

**Table S2.** Genome-wide expression of *Salmonella enterica* serovar Typhimurium inside fibroblasts

Intracellular WT 24 h p.i.      Intracellular *phoP* 24 h p.i.      Extracellular WT stationary phase

Relative to WT exponential LB      Relative to *phoP* exponential LB      Relative to WT exponential LB



| Systematic name | Gene    | Product                                           | log2Ratio (M) | p value | log2Ratio (M) | p value | log2Ratio (M) | p value |
|-----------------|---------|---------------------------------------------------|---------------|---------|---------------|---------|---------------|---------|
| STM0224         | yaeT    | putative outer membrane protein precursor         | -3.71         | 0.00537 | -1.68         | 0.00310 | -3.98         | 0.00130 |
| STM0224         | yaeT    | putative outer membrane protein precursor         | -2.87         | 0.00567 | -1.53         | 0.00212 | -3.53         | 0.00010 |
| STM0225         | hlpA    | outer membrane protein H precursor                | -4.56         | 0.01041 | -2.62         | 0.00034 | -4.87         | 0.00003 |
| STM0225         | hlpA    | outer membrane protein H precursor                | -3.82         | 0.00595 | -1.38         | 0.00459 | -5.05         | 0.00002 |
| STM0226         | lpxD    | UDP-3-O-                                          | -2.60         | 0.00955 | -0.46         | 0.13893 | -2.22         | 0.00296 |
| STM0226         | lpxD    | UDP-3-O-                                          | -2.61         | 0.01171 | -0.49         | 0.20583 | -2.13         | 0.00246 |
| STM0227         | fabZ    | (3R)-hydroxymyristoyl ACP dehydratase             | -0.87         | 0.15305 | -0.54         | 0.12848 | -2.28         | 0.00077 |
| STM0227         | fabZ    | (3R)-hydroxymyristoyl ACP dehydratase             | -0.82         | 0.28394 | -0.39         | 0.20516 | -2.47         | 0.00043 |
| STM0228         | lpxA    | UDP-N-acetylglucosamine acyltransferase           | -0.92         | 0.10850 | -0.65         | 0.12912 | -1.61         | 0.00215 |
| STM0228         | lpxA    | UDP-N-acetylglucosamine acyltransferase           | -0.77         | 0.14184 | -0.17         | 0.62607 | -2.04         | 0.00151 |
| STM0229         | lpxB    | lipid-A-disaccharide synthase                     | -1.88         | 0.01041 | -1.27         | 0.00374 | -2.76         | 0.00016 |
| STM0229         | lpxB    | lipid-A-disaccharide synthase                     | -1.29         | 0.04522 | -1.50         | 0.00145 | -2.11         | 0.00393 |
| STM0230         | rnhB    | ribonuclease HII                                  | -3.24         | 0.00547 | -1.94         | 0.00060 | -2.99         | 0.00045 |
| STM0230         | rnhB    | ribonuclease HII                                  | -2.66         | 0.00889 | -1.96         | 0.00030 | -2.72         | 0.00395 |
| STM0231         | dnaE    | DNA polymerase III subunit alpha                  | -2.21         | 0.04403 | -1.60         | 0.00160 | -3.08         | 0.00009 |
| STM0231         | dnaE    | DNA polymerase III subunit alpha                  | -2.46         | 0.01311 | -1.68         | 0.00058 | -2.56         | 0.00024 |
| STM0232         | accA    | acetyl-CoA carboxylase alpha subunit              | -2.84         | 0.00562 | -1.09         | 0.03399 | -2.70         | 0.00039 |
| STM0232         | accA    | acetyl-CoA carboxylase alpha subunit              | -1.64         | 0.02217 | -1.46         | 0.00257 | -1.26         | 0.11040 |
| STM0233         | STM0233 | putative endochitinase                            | -0.92         | 0.09910 | -0.93         | 0.07997 | 0.08          | 0.88988 |
| STM0233         | STM0233 | putative endochitinase                            | 0.15          | 0.83890 | -0.87         | 0.07620 | -0.79         | 0.18051 |
| STM0234         | ldcC    | lysine decarboxylase 2                            | -0.70         | 0.28591 | 0.17          | 0.65577 | -0.92         | 0.10652 |
| STM0234         | ldcC    | lysine decarboxylase 2                            | 0.19          | 0.76451 | 0.20          | 0.45852 | 0.39          | 0.27456 |
| STM0235         | yaeR    | putative lactoylglutathione lyase                 | -0.03         | 0.96567 | -0.54         | 0.08941 | 0.17          | 0.74204 |
| STM0235         | yaeR    | putative lactoylglutathione lyase                 | 0.62          | 0.56681 | 0.11          | 0.86520 | 0.77          | 0.24607 |
| STM0236         | mesJ    | cell cycle protein                                | -0.93         | 0.08440 | -0.93         | 0.01001 | -1.40         | 0.03582 |
| STM0236         | mesJ    | cell cycle protein                                | 0.49          | 0.37352 | -0.72         | 0.02890 | 0.16          | 0.71863 |
| STM0237         | rof     | Rho-dependent transcription termination modulator | -1.10         | 0.05312 | -0.55         | 0.10878 | -1.10         | 0.01499 |
| STM0237         | rof     | Rho-dependent transcription termination modulator | -0.18         | 0.67678 | -0.48         | 0.09489 | -0.46         | 0.38319 |
| STM0238         | yaeP    | hypothetical protein STM0238                      | -1.58         | 0.04652 | -0.58         | 0.06192 | -0.09         | 0.83791 |
| STM0238         | yaeP    | hypothetical protein STM0238                      | -1.30         | 0.05496 | 0.06          | 0.85155 | -0.07         | 0.88163 |
| STM0239         | yaeQ    | putative cytoplasmic protein                      | -1.47         | 0.12485 | -0.96         | 0.01376 | -0.64         | 0.42310 |
| STM0239         | yaeQ    | putative cytoplasmic protein                      | -1.07         | 0.05056 | -1.70         | 0.00057 | -1.74         | 0.00322 |
| STM0240         | yaeJ    | hypothetical protein STM0240                      | -1.07         | 0.06218 | -0.09         | 0.78792 | -0.65         | 0.07569 |
| STM0240         | yaeJ    | hypothetical protein STM0240                      | 0.33          | 0.76451 | -0.03         | 0.95605 | 0.35          | 0.33281 |
| STM0242         | proS    | prolyl-tRNA synthetase                            | -0.10         | 0.87043 | -1.88         | 0.00108 | -1.32         | 0.02684 |
| STM0242         | proS    | prolyl-tRNA synthetase                            | -0.10         | 0.90313 | -2.36         | 0.00678 | -0.22         | 0.70170 |
| STM0243         | yaeB    | putative regulatory protein                       | -1.17         | 0.25779 | -0.83         | 0.01733 | -2.36         | 0.00113 |
| STM0243         | yaeB    | putative regulatory protein                       | -0.09         | 0.95054 | -1.00         | 0.01222 | -1.81         | 0.00780 |
| STM0244         | rscF    | colanic acid synthesis regulator                  | -2.60         | 0.00571 | -1.54         | 0.00130 | -2.07         | 0.00118 |
| STM0244         | rscF    | colanic acid synthesis regulator                  | -1.40         | 0.02655 | -1.04         | 0.03556 | -1.61         | 0.00278 |
| STM0245         | yaeC    | putative outer membrane lipoprotein               | -1.46         | 0.12963 | -0.36         | 0.34109 | -1.29         | 0.02347 |
| STM0245         | yaeC    | putative outer membrane lipoprotein               | -0.24         | 0.65131 | -0.34         | 0.21026 | -1.27         | 0.00528 |
| STM0246         | yaeE    | putative transport protein                        | -1.87         | 0.01164 | -0.71         | 0.02321 | -0.63         | 0.18491 |
| STM0246         | yaeE    | putative transport protein                        | -1.26         | 0.02667 | 0.40          | 0.37103 | -0.30         | 0.59876 |
| STM0247         | abc     | putative transport protein                        | -1.81         | 0.03508 | -0.95         | 0.01006 | -0.75         | 0.08104 |
| STM0247         | abc     | putative transport protein                        | -0.98         | 0.41696 | -0.89         | 0.00927 | -0.44         | 0.21695 |
| STM0248         | yaeD    | hypothetical protein STM0248                      | 1.31          | 0.03167 | 0.37          | 0.24386 | 0.35          | 0.45257 |
| STM0248         | yaeD    | hypothetical protein STM0248                      | 1.15          | 0.12056 | 0.16          | 0.67323 | 1.23          | 0.03977 |
| STM0249         | rrsH    | STM0249                                           | -1.59         | 0.21078 | 0.93          | 0.03369 | 0.26          | 0.61903 |
| STM0249         | rrsH    | STM0249                                           | -1.37         | 0.43159 | 0.69          | 0.06921 | 0.06          | 0.92607 |
| STM0250         | ileV    | STM0250                                           | 0.95          | 0.26794 | 0.51          | 0.16730 | 1.26          | 0.02305 |
| STM0250         | ileV    | STM0250                                           | 1.66          | 0.02121 | 0.84          | 0.06829 | 1.19          | 0.02045 |
| STM0251         | alaV    | STM0251                                           | 0.75          | 0.34691 | 0.25          | 0.52399 | 0.73          | 0.10246 |
| STM0251         | alaV    | STM0251                                           | 1.55          | 0.02400 | 0.87          | 0.02044 | 0.65          | 0.08377 |
| STM0252         | rrlH    | STM0252                                           | -2.35         | 0.04570 | 0.75          | 0.17038 | 0.24          | 0.69099 |
| STM0252         | rrlH    | STM0252                                           | -2.08         | 0.03561 | 1.16          | 0.01083 | 0.06          | 0.91555 |
| STM0253         | rrfH    | STM0253                                           | 0.21          | 0.69382 | -0.15         | 0.68981 | 0.25          | 0.62768 |
| STM0253         | rrfH    | STM0253                                           | 0.51          | 0.32123 | -0.17         | 0.67976 | 0.46          | 0.24875 |
| STM0254         | aspU    | STM0254                                           | -0.60         | 0.33366 | 0.70          | 0.21886 | 0.10          | 0.83871 |
| STM0254         | aspU    | STM0254                                           | -0.30         | 0.61544 | 0.41          | 0.36782 | 0.07          | 0.87206 |
| STM0255         | yafB    | 2,5-diketo-D-gluconate reductase B                | -1.18         | 0.15583 | -0.95         | 0.01203 | 0.12          | 0.83312 |
| STM0255         | yafB    | 2,5-diketo-D-gluconate reductase B                | 0.20          | 0.62843 | -1.14         | 0.03527 | 0.71          | 0.12468 |
| STM0256         | yafC    | putative transcriptional regulator                | -1.47         | 0.04976 | -1.20         | 0.00536 | 0.23          | 0.67001 |
| STM0256         | yafC    | putative transcriptional regulator                | -1.52         | 0.02281 | -1.33         | 0.00215 | 0.30          | 0.48583 |
| STM0257         | STM0257 | putative drug efflux protein                      | -0.30         | 0.49184 | -0.33         | 0.27638 | -0.26         | 0.72025 |
| STM0257         | STM0257 | putative drug efflux protein                      | -1.48         | 0.09447 | -0.86         | 0.02722 | -1.55         | 0.09804 |
| STM0258         | yafD    | hypothetical protein STM0258                      | -0.84         | 0.08154 | 0.72          | 0.03620 | -0.34         | 0.56742 |
| STM0258         | yafD    | hypothetical protein STM0258                      | -0.44         | 0.37352 | 0.73          | 0.02700 | 0.35          | 0.59886 |
| STM0259         | yafE    | putative methyltransferase                        | -0.17         | 0.70976 | 1.36          | 0.02815 | -1.00         | 0.01911 |
| STM0259         | yafE    | putative methyltransferase                        | 0.45          | 0.31724 | 1.48          | 0.00209 | -0.17         | 0.70148 |

**Table S2.** Genome-wide expression of *Salmonella enterica* serovar Typhimurium inside fibroblasts

Intracellular WT 24 h p.i.      Intracellular *phoP* 24 h p.i.      Extracellular WT stationary phase

Relative to WT exponential LB      Relative to *phoP* exponential LB      Relative to WT exponential LB



| Systematic name | Gene      | Product                                  | log2Ratio (M) | p value | log2Ratio (M) | p value | log2Ratio (M) | p value |
|-----------------|-----------|------------------------------------------|---------------|---------|---------------|---------|---------------|---------|
| STM0260         | dniR      | transcriptional regulator                | 3.15          | 0.11193 | 2.31          | 0.00015 | 2.04          | 0.00894 |
| STM0260         | dniR      | transcriptional regulator                | -0.54         | 0.82326 | 2.00          | 0.00204 | 0.19          | 0.76232 |
| STM0261         | gloB      | hydroxyacylglutathione hydrolase         | -0.83         | 0.11463 | 1.10          | 0.02026 | -1.62         | 0.01551 |
| STM0261         | gloB      | hydroxyacylglutathione hydrolase         | 0.35          | 0.57498 | 0.97          | 0.01275 | -0.18         | 0.80729 |
| STM0262         | yafS      | putative SAM-dependent methyltransferase | -0.87         | 0.21374 | 0.08          | 0.83238 | 0.74          | 0.52255 |
| STM0262         | yafS      | putative SAM-dependent methyltransferase | 0.02          | 0.97285 | -0.53         | 0.09094 | -0.12         | 0.84461 |
| STM0263         | rnhA      | ribonuclease H                           | 0.63          | 0.22844 | 0.19          | 0.69786 | -1.15         | 0.01504 |
| STM0263         | rnhA      | ribonuclease H                           | 0.58          | 0.20626 | -0.09         | 0.81152 | -0.72         | 0.16683 |
| STM0264         | dnaQ      | DNA polymerase III subunit epsilon       | -1.31         | 0.03369 | -0.82         | 0.03891 | -0.54         | 0.16054 |
| STM0264         | dnaQ      | DNA polymerase III subunit epsilon       | 1.70          | 0.06090 | -0.58         | 0.11251 | 0.27          | 0.56839 |
| STM0265         | aspV      | STM0265                                  | -1.25         | 0.04812 | 0.17          | 0.72668 | 0.19          | 0.68125 |
| STM0265         | aspV      | STM0265                                  | -0.65         | 0.27981 | 0.12          | 0.82375 | -0.01         | 0.97874 |
| STM0266         | STM0266   | putative cytoplasmic protein             | -0.34         | 0.63111 | -0.50         | 0.18123 | -0.92         | 0.02623 |
| STM0266         | STM0266   | putative cytoplasmic protein             | -0.51         | 0.25707 | -0.75         | 0.06273 | -0.52         | 0.17408 |
| STM0267         | STM0267   | putative cytoplasmic protein             | -0.98         | 0.05245 | -0.25         | 0.47940 | -0.27         | 0.52711 |
| STM0267         | STM0267   | putative cytoplasmic protein             | -1.06         | 0.13291 | -1.42         | 0.01072 | -0.22         | 0.85842 |
| STM0268         | STM0268   | putative cytoplasmic protein             | 0.24          | 0.71380 | -2.76         | 0.00056 | -1.16         | 0.10461 |
| STM0268         | STM0268   | putative cytoplasmic protein             | 0.18          | 0.78595 | -2.70         | 0.00014 | -0.31         | 0.69836 |
| STM0269         | STM0269   | putative cytoplasmic protein             | -0.24         | 0.80094 | -0.42         | 0.24775 | -1.37         | 0.03153 |
| STM0269         | STM0269   | putative cytoplasmic protein             | 0.19          | 0.87813 | -0.38         | 0.34761 | -0.77         | 0.45935 |
| STM0270         | STM0270   | putative cytoplasmic protein             | -0.59         | 0.24713 | -0.44         | 0.46632 | -0.16         | 0.68490 |
| STM0270         | STM0270   | putative cytoplasmic protein             | -1.19         | 0.34585 | -0.71         | 0.03755 | -0.47         | 0.24787 |
| STM0271         | STM0271   | putative cytoplasmic protein             | -0.15         | 0.86361 | 0.69          | 0.05346 | -0.22         | 0.67096 |
| STM0271         | STM0271   | putative cytoplasmic protein             | 1.20          | 0.19282 | 0.40          | 0.33762 | 1.44          | 0.02860 |
| STM0272         | STM0272   | putative chaperone ATPase                | 0.12          | 0.88887 | -0.52         | 0.14676 | -0.43         | 0.41248 |
| STM0272         | STM0272   | putative chaperone ATPase                | 0.47          | 0.44347 | 0.55          | 0.18273 | 0.73          | 0.16331 |
| STM0273         | STM0273   | putative cytoplasmic protein             | 0.14          | 0.82796 | -0.16         | 0.75985 | -0.62         | 0.40503 |
| STM0273         | STM0273   | putative cytoplasmic protein             | 0.43          | 0.55466 | -0.22         | 0.45944 | 0.44          | 0.43448 |
| STM0274         | STM0274   | putative cytoplasmic protein             | -0.09         | 0.89074 | -0.07         | 0.85978 | 0.93          | 0.11443 |
| STM0274         | STM0274   | putative cytoplasmic protein             | -0.75         | 0.47036 | -0.96         | 0.19130 | -0.28         | 0.57478 |
| STM0275,s       | STM0275,s | putative cytoplasmic protein             | -0.20         | 0.83452 | 0.34          | 0.38822 | -0.66         | 0.32583 |
| STM0275,s       | STM0275,s | putative cytoplasmic protein             | -1.40         | 0.02492 | -1.23         | 0.04708 | 0.15          | 0.79506 |
| STM0276         | STM0276   | putative cytoplasmic protein             | 1.24          | 0.08296 | 0.47          | 0.15971 | -0.56         | 0.13422 |
| STM0276         | STM0276   | putative cytoplasmic protein             | 3.14          | 0.06234 | -0.42         | 0.47184 | 0.21          | 0.70830 |
| STM0277         | STM0277   | putative cytoplasmic protein             | 1.01          | 0.09208 | -0.13         | 0.81126 | -0.23         | 0.73603 |
| STM0277         | STM0277   | putative cytoplasmic protein             | 0.71          | 0.20867 | 0.08          | 0.86757 | 0.36          | 0.61774 |
| STM0278         | STM0278   | putative periplasmic protein             | 0.03          | 0.96378 | 0.34          | 0.45657 | 0.55          | 0.40716 |
| STM0278         | STM0278   | putative periplasmic protein             | 0.69          | 0.36030 | 1.12          | 0.02793 | 1.95          | 0.00905 |
| STM0279         | STM0279   | putative cytoplasmic protein             | 3.03          | 0.06140 | -1.71         | 0.00234 | 0.19          | 0.76157 |
| STM0279         | STM0279   | putative cytoplasmic protein             | 3.46          | 0.01388 | -1.78         | 0.00438 | -0.03         | 0.96217 |
| STM0280         | STM0280   | putative outer membrane lipoprotein      | 1.88          | 0.03111 | 0.22          | 0.48490 | 2.64          | 0.00216 |
| STM0280         | STM0280   | putative outer membrane lipoprotein      | 2.65          | 0.00727 | -0.04         | 0.92332 | 3.05          | 0.00130 |
| STM0281         | STM0281   | putative cytoplasmic protein             | 1.45          | 0.22065 | -0.48         | 0.09951 | 1.77          | 0.05066 |
| STM0281         | STM0281   | putative cytoplasmic protein             | 2.18          | 0.01600 | 0.66          | 0.53636 | 1.28          | 0.01955 |
| STM0282         | STM0282   | hypothetical protein STM0282             | -0.49         | 0.27290 | -0.03         | 0.94723 | -0.35         | 0.59002 |
| STM0282         | STM0282   | hypothetical protein STM0282             | 0.45          | 0.44254 | -0.85         | 0.09595 | 0.05          | 0.94872 |
| STM0283         | STM0283   | putative inner membrane protein          | -0.73         | 0.14984 | -0.13         | 0.91349 | -0.04         | 0.94651 |
| STM0283         | STM0283   | putative inner membrane protein          | 0.45          | 0.51450 | -0.61         | 0.11555 | -0.37         | 0.50024 |
| STM0284         | STM0284   | putative Shiga-like toxin A subunit      | -0.86         | 0.08168 | 0.79          | 0.05693 | 0.42          | 0.39961 |
| STM0284         | STM0284   | putative Shiga-like toxin A subunit      | -1.35         | 0.04270 | -0.10         | 0.78725 | -0.17         | 0.79099 |
| STM0285         | STM0285   | putative inner membrane protein          | -0.73         | 0.41786 | -0.70         | 0.10642 | -1.01         | 0.06193 |
| STM0285         | STM0285   | putative inner membrane protein          | 0.12          | 0.82875 | -0.87         | 0.05324 | 0.45          | 0.52733 |
| STM0286         | STM0286   | putative cytoplasmic protein             | 1.08          | 0.05582 | 0.67          | 0.04705 | 0.76          | 0.28422 |
| STM0286         | STM0286   | putative cytoplasmic protein             | 1.76          | 0.01982 | 0.07          | 0.88217 | 2.64          | 0.00072 |
| STM0287         | STM0287   | putative periplasmic protein             | 0.71          | 0.19529 | 0.79          | 0.02667 | 0.36          | 0.41923 |
| STM0287         | STM0287   | putative periplasmic protein             | 1.15          | 0.06515 | 0.83          | 0.07614 | -0.05         | 0.95596 |
| STM0288         | STM0288   | putative cytoplasmic protein             | 0.71          | 0.21068 | -0.94         | 0.05962 | -1.22         | 0.14647 |
| STM0288         | STM0288   | putative cytoplasmic protein             | 1.18          | 0.03861 | -0.96         | 0.04492 | -0.40         | 0.59886 |
| STM0289         | STM0289   | putative cytoplasmic protein             | 0.80          | 0.22435 | -0.52         | 0.23106 | 0.28          | 0.77070 |
| STM0289         | STM0289   | putative cytoplasmic protein             | 1.76          | 0.03422 | -0.57         | 0.26038 | 0.78          | 0.07951 |
| STM0290         | STM0290   | putative cytoplasmic protein             | -0.65         | 0.36920 | -1.33         | 0.00432 | -0.53         | 0.39278 |
| STM0290         | STM0290   | putative cytoplasmic protein             | 1.48          | 0.03382 | -2.06         | 0.00022 | -0.10         | 0.78315 |
| STM0291         | STM0291   | putative RHS-like protein                | 0.14          | 0.79237 | 1.71          | 0.00397 | 0.97          | 0.03993 |
| STM0291         | STM0291   | putative RHS-like protein                | 1.31          | 0.05665 | 1.78          | 0.00100 | 1.12          | 0.00912 |
| STM0292         | STM0292   | putative RHS-like protein                | -1.19         | 0.03861 | 0.86          | 0.03785 | -0.64         | 0.31811 |
| STM0292         | STM0292   | putative RHS-like protein                | 0.86          | 0.12988 | 1.71          | 0.00054 | 0.58          | 0.13643 |
| STM0293         | STM0293   | putative cytoplasmic protein             | 0.27          | 0.56983 | 1.55          | 0.00666 | -0.73         | 0.15615 |
| STM0293         | STM0293   | putative cytoplasmic protein             | 0.30          | 0.70725 | 0.93          | 0.02180 | 0.00          | 0.99701 |
| STM0294         | STM0294   | putative cytoplasmic protein             | 0.70          | 0.19847 | 1.10          | 0.02842 | 1.08          | 0.01426 |
| STM0294         | STM0294   | putative cytoplasmic protein             | 1.39          | 0.03379 | 0.84          | 0.06553 | 1.20          | 0.06200 |

**Table S2.** Genome-wide expression of *Salmonella enterica* serovar Typhimurium inside fibroblasts

Intracellular WT 24 h p.i.      Intracellular *phoP* 24 h p.i.      Extracellular WT stationary phase

Relative to WT exponential LB      Relative to *phoP* exponential LB      Relative to WT exponential LB



| Systematic name | Gene       | Product                                 | log2Ratio (M) | p value | log2Ratio (M) | p value | log2Ratio (M) | p value |
|-----------------|------------|-----------------------------------------|---------------|---------|---------------|---------|---------------|---------|
| STM0294,1N      | STM0294,1N | hypothetical protein STM0294,1N         | 3.26          | 0.00645 | 1.15          | 0.03290 | 3.76          | 0.00010 |
| STM0294,1N      | STM0294,1N | hypothetical protein STM0294,1N         | 3.33          | 0.00546 | -0.13         | 0.93191 | 3.62          | 0.00008 |
| STM0295         | STM0295    | putative cytoplasmic protein            | 3.90          | 0.00546 | 2.83          | 0.00138 | 5.03          | 0.00005 |
| STM0295         | STM0295    | putative cytoplasmic protein            | 3.27          | 0.00547 | 1.66          | 0.01776 | 5.44          | 0.00002 |
| STM0300         | safB       | putative fimbrial assembly chaparone    | 0.31          | 0.62076 | 1.05          | 0.05189 | 0.17          | 0.83006 |
| STM0300         | safB       | putative fimbrial assembly chaparone    | 1.78          | 0.01765 | 0.51          | 0.42233 | 1.70          | 0.00335 |
| STM0301         | safC       | putative fimbrial usher                 | 0.46          | 0.47324 | 0.07          | 0.94679 | 0.83          | 0.09407 |
| STM0301         | safC       | putative fimbrial usher                 | 0.99          | 0.05377 | 1.85          | 0.00065 | -0.55         | 0.15834 |
| STM0302         | safD       | putative fimbrial subunit               | 0.30          | 0.58485 | 1.67          | 0.00110 | -1.07         | 0.03475 |
| STM0302         | safD       | putative fimbrial subunit               | 0.73          | 0.12519 | 1.31          | 0.01103 | -0.06         | 0.94646 |
| STM0303         | ybeJ       | putative xylanase/chitin deacetylase    | 0.79          | 0.26284 | -0.64         | 0.30216 | -0.69         | 0.15956 |
| STM0303         | ybeJ       | putative xylanase/chitin deacetylase    | 1.20          | 0.27549 | -0.69         | 0.14608 | 0.18          | 0.75788 |
| STM0304         | sinR       | transcriptional regulator               | -0.56         | 0.24692 | -1.11         | 0.01113 | -0.71         | 0.16517 |
| STM0304         | sinR       | transcriptional regulator               | -0.76         | 0.47550 | -0.63         | 0.11518 | -0.33         | 0.38859 |
| STM0306         | STM0306    | SapA-like protein                       | 0.66          | 0.31507 | 0.29          | 0.49921 | -2.02         | 0.01290 |
| STM0306         | STM0306    | SapA-like protein                       | 1.71          | 0.01479 | 0.37          | 0.47297 | -0.18         | 0.71302 |
| STM0307         | STM0307    | VirG-like protein                       | -1.07         | 0.07040 | 1.14          | 0.00695 | -0.41         | 0.49271 |
| STM0307         | STM0307    | VirG-like protein                       | 1.11          | 0.05865 | 1.28          | 0.00256 | 1.69          | 0.00843 |
| STM0308         | yafV       | putative amidohydrolase                 | -0.26         | 0.70034 | 0.14          | 0.61349 | -0.96         | 0.04719 |
| STM0308         | yafV       | putative amidohydrolase                 | 1.87          | 0.01155 | 0.80          | 0.03824 | 0.49          | 0.21204 |
| STM0309         | fadE       | acyl-CoA dehydrogenase                  | 0.58          | 0.54856 | 0.74          | 0.04259 | 1.13          | 0.01597 |
| STM0309         | fadE       | acyl-CoA dehydrogenase                  | 0.67          | 0.48874 | 0.78          | 0.03242 | 1.60          | 0.00877 |
| STM0310         | ghmA       | phosphoheptose isomerase                | -2.38         | 0.00831 | 0.19          | 0.75160 | -1.13         | 0.01175 |
| STM0310         | ghmA       | phosphoheptose isomerase                | -1.29         | 0.05247 | -0.54         | 0.07016 | -0.88         | 0.05385 |
| STM0311         | yafJ       | putative glutamine amidotransferase     | -0.85         | 0.07461 | -0.08         | 0.81482 | -1.14         | 0.13273 |
| STM0311         | yafJ       | putative glutamine amidotransferase     | -0.98         | 0.06241 | -0.19         | 0.56737 | -0.62         | 0.18303 |
| STM0312         | yafK       | putative periplasmic protein            | -2.23         | 0.01027 | -0.62         | 0.05446 | -1.97         | 0.00228 |
| STM0312         | yafK       | putative periplasmic protein            | -1.54         | 0.02655 | -0.69         | 0.04908 | -2.63         | 0.00034 |
| STM0313         | dinP       | DNA polymerase IV                       | 0.81          | 0.33161 | 0.53          | 0.28850 | 0.25          | 0.80874 |
| STM0313         | dinP       | DNA polymerase IV                       | 2.24          | 0.00992 | -0.29         | 0.72704 | 0.76          | 0.16277 |
| STM0315         | prfH       | peptide chain release factor 2          | -0.44         | 0.41885 | 0.47          | 0.24038 | -2.49         | 0.00058 |
| STM0315         | prfH       | peptide chain release factor 2          | -0.34         | 0.41696 | 0.87          | 0.02865 | -1.92         | 0.00476 |
| STM0316         | pepD       | aminoacyl-histidine dipeptidase         | -1.30         | 0.04378 | 1.08          | 0.01086 | -1.39         | 0.01254 |
| STM0316         | pepD       | aminoacyl-histidine dipeptidase         | -0.57         | 0.22379 | 1.67          | 0.00349 | -1.02         | 0.04449 |
| STM0317         | gpt        | xanthine phosphoribosyltransferase      | -1.50         | 0.01645 | -0.97         | 0.02499 | -1.73         | 0.00147 |
| STM0317         | gpt        | xanthine phosphoribosyltransferase      | -0.47         | 0.35799 | -1.26         | 0.00959 | -0.95         | 0.04027 |
| STM0318         | yafA       | hypothetical protein STM0318            | -1.09         | 0.05948 | -0.37         | 0.28109 | -0.36         | 0.40030 |
| STM0318         | yafA       | hypothetical protein STM0318            | -0.45         | 0.45611 | -0.49         | 0.22238 | 0.58          | 0.11876 |
| STM0319         | crl        | transcriptional regulator               | -0.60         | 0.65388 | -0.74         | 0.06799 | -0.62         | 0.17055 |
| STM0319         | crl        | transcriptional regulator               | 0.66          | 0.19039 | -0.34         | 0.33532 | -0.74         | 0.06840 |
| STM0320         | phoE       | outer membrane pore protein E precursor | -1.48         | 0.04758 | -0.23         | 0.56825 | -0.49         | 0.39379 |
| STM0320         | phoE       | outer membrane pore protein E precursor | -0.22         | 0.82735 | -0.53         | 0.14809 | -0.23         | 0.57695 |
| STM0321         | proB       | gamma-glutamyl kinase                   | -1.72         | 0.01699 | -0.42         | 0.26171 | -1.13         | 0.00027 |
| STM0321         | proB       | gamma-glutamyl kinase                   | -0.71         | 0.12316 | -0.61         | 0.11876 | -2.11         | 0.00050 |
| STM0322         | proA       | gamma-glutamyl phosphate reductase      | -0.77         | 0.17969 | -0.16         | 0.58424 | -0.69         | 0.11179 |
| STM0322         | proA       | gamma-glutamyl phosphate reductase      | 0.23          | 0.73216 | -0.29         | 0.32295 | 0.19          | 0.78771 |
| STM0323         | thrW       | STM0323                                 | -2.02         | 0.01047 | -1.57         | 0.01373 | 3.03          | 0.00045 |
| STM0323         | thrW       | STM0323                                 | -0.40         | 0.49299 | -1.07         | 0.05854 | 3.25          | 0.00008 |
| STM0325         | STM0325    | putative truncated IS3 transposase      | -0.29         | 0.69395 | -0.58         | 0.15359 | -1.23         | 0.06104 |
| STM0325         | STM0325    | putative truncated IS3 transposase      | 1.26          | 0.09878 | -0.81         | 0.03968 | -0.13         | 0.79044 |
| STM0327         | STM0327    | putative cytoplasmic protein            | 0.21          | 0.78079 | 1.29          | 0.00411 | 1.30          | 0.01238 |
| STM0327         | STM0327    | putative cytoplasmic protein            | 1.25          | 0.22810 | 1.22          | 0.00990 | 3.05          | 0.00431 |
| STM0328,s       | STM0328,s  | putative permease                       | 0.05          | 0.93975 | -1.24         | 0.08373 | -0.48         | 0.32071 |
| STM0328,s       | STM0328,s  | putative permease                       | 1.54          | 0.01788 | -1.03         | 0.02604 | 1.14          | 0.01145 |
| STM0329         | STM0329    | isopropylmalate isomerase large subunit | 1.08          | 0.24833 | 1.15          | 0.01395 | 2.41          | 0.00071 |
| STM0329         | STM0329    | isopropylmalate isomerase large subunit | 1.06          | 0.22639 | 0.52          | 0.33447 | 2.79          | 0.00024 |
| STM0330         | STM0330    | putative 3-isopropylmalate isomerase    | 0.83          | 0.17735 | -1.39         | 0.00764 | 0.48          | 0.60754 |
| STM0330         | STM0330    | putative 3-isopropylmalate isomerase    | 0.59          | 0.26511 | -1.41         | 0.00509 | 1.81          | 0.01230 |
| STM0331         | STM0331    | putative fumarylacetoacetate hydrolase  | -0.97         | 0.12003 | -0.17         | 0.85326 | -0.66         | 0.38370 |
| STM0331         | STM0331    | putative fumarylacetoacetate hydrolase  | 0.75          | 0.18876 | -0.95         | 0.01882 | 0.80          | 0.36586 |
| STM0332         | STM0332    | putative hydrolase/acyltransferase      | -0.20         | 0.72557 | 0.30          | 0.40732 | 1.46          | 0.00840 |
| STM0332         | STM0332    | putative hydrolase/acyltransferase      | 0.89          | 0.53618 | -1.63         | 0.02217 | -2.06         | 0.01095 |
| STM0333         | STM0333    | putative transcriptional regulator      | -0.32         | 0.72201 | -1.92         | 0.00244 | -1.07         | 0.29558 |
| STM0333         | STM0333    | putative transcriptional regulator      | -0.16         | 0.80777 | -0.80         | 0.04075 | -0.67         | 0.25586 |
| STM0335         | STM0335    | putative outer membrane protein         | -0.45         | 0.41950 | -0.67         | 0.39209 | -0.67         | 0.22619 |
| STM0335         | STM0335    | putative outer membrane protein         | 0.00          | 0.99756 | -0.84         | 0.14928 | 0.57          | 0.31962 |
| STM0336         | stbE       | putative fimbrial chaparone             | 0.33          | 0.54847 | 1.49          | 0.03479 | -0.34         | 0.60390 |
| STM0336         | stbE       | putative fimbrial chaparone             | 0.81          | 0.09401 | -0.90         | 0.05330 | 0.63          | 0.13122 |
| STM0337         | stbD       | putative fimbrial usher                 | 0.10          | 0.88435 | 0.62          | 0.08758 | 0.83          | 0.08784 |
| STM0337         | stbD       | putative fimbrial usher                 | 1.85          | 0.09788 | 0.21          | 0.67955 | 2.19          | 0.00233 |

**Table S2.** Genome-wide expression of *Salmonella enterica* serovar Typhimurium inside fibroblasts

|                 |           |                                            | Intracellular WT<br>24 h p.i.                                                      |         | Intracellular <i>phoP</i><br>24 h p.i.                                              |         | Extracellular WT<br>stationary phase                                                |         |
|-----------------|-----------|--------------------------------------------|------------------------------------------------------------------------------------|---------|-------------------------------------------------------------------------------------|---------|-------------------------------------------------------------------------------------|---------|
|                 |           |                                            | Relative to WT<br>exponential LB                                                   |         | Relative to <i>phoP</i><br>exponential LB                                           |         | Relative to WT<br>exponential LB                                                    |         |
|                 |           |                                            |  |         |  |         |  |         |
| Systematic name | Gene      | Product                                    | log2Ratio (M)                                                                      | p value | log2Ratio (M)                                                                       | p value | log2Ratio (M)                                                                       | p value |
| STM0338         | stbC      | putative fimbrial usher                    | 1.25                                                                               | 0.03578 | 1.06                                                                                | 0.04902 | -0.31                                                                               | 0.47459 |
| STM0338         | stbC      | putative fimbrial usher                    | 2.21                                                                               | 0.01336 | 1.18                                                                                | 0.05327 | 1.22                                                                                | 0.06140 |
| STM0339         | stbB      | putative fimbrial chaperone                | 4.72                                                                               | 0.08359 | -0.84                                                                               | 0.04037 | 2.87                                                                                | 0.02488 |
| STM0339         | stbB      | putative fimbrial chaperone                | 2.29                                                                               | 0.05250 | 0.32                                                                                | 0.47985 | 1.58                                                                                | 0.28613 |
| STM0340         | stbA      | putative fimbrial major subunit            | -0.20                                                                              | 0.87933 | 1.29                                                                                | 0.01047 | 2.26                                                                                | 0.00168 |
| STM0340         | stbA      | putative fimbrial major subunit            | -0.31                                                                              | 0.86173 | 0.87                                                                                | 0.07749 | 2.59                                                                                | 0.00030 |
| STM0341         | STM0341   | putative inner membrane protein            | 0.05                                                                               | 0.91382 | 0.17                                                                                | 0.78293 | -0.20                                                                               | 0.72994 |
| STM0341         | STM0341   | putative inner membrane protein            | 0.48                                                                               | 0.64858 | 1.03                                                                                | 0.17739 | -0.33                                                                               | 0.54924 |
| STM0342         | STM0342   | putative periplasmic protein               | 0.18                                                                               | 0.74416 | 0.20                                                                                | 0.76403 | 1.48                                                                                | 0.01320 |
| STM0342         | STM0342   | putative periplasmic protein               | 0.40                                                                               | 0.35321 | 0.12                                                                                | 0.74224 | 0.87                                                                                | 0.07936 |
| STM0343         | STM0343   | hypothetical protein STM0343               | 0.04                                                                               | 0.94323 | 0.88                                                                                | 0.02001 | -0.05                                                                               | 0.93137 |
| STM0343         | STM0343   | hypothetical protein STM0343               | 0.71                                                                               | 0.30754 | 0.56                                                                                | 0.23766 | -0.09                                                                               | 0.83862 |
| STM0344         | STM0344   | putative response regulator                | -0.67                                                                              | 0.14382 | 0.64                                                                                | 0.28290 | -0.26                                                                               | 0.61128 |
| STM0344         | STM0344   | putative response regulator                | 0.80                                                                               | 0.63756 | -0.05                                                                               | 0.91856 | -0.70                                                                               | 0.17998 |
| STM0345         | STM0345   | putative inner membrane protein            | 0.77                                                                               | 0.55647 | 0.46                                                                                | 0.13101 | -0.97                                                                               | 0.03020 |
| STM0345         | STM0345   | putative inner membrane protein            | 1.03                                                                               | 0.31051 | 0.02                                                                                | 0.97149 | -0.15                                                                               | 0.72283 |
| STM0346         | STM0346   | putative outer membrane protein            | -0.07                                                                              | 0.89465 | 0.67                                                                                | 0.14174 | 0.11                                                                                | 0.91210 |
| STM0346         | STM0346   | putative outer membrane protein            | 0.32                                                                               | 0.49792 | 0.09                                                                                | 0.83752 | 0.68                                                                                | 0.24360 |
| STM0347         | STM0347   | putative response regulator                | -0.82                                                                              | 0.19700 | 0.01                                                                                | 0.98453 | -0.60                                                                               | 0.13475 |
| STM0347         | STM0347   | putative response regulator                | 0.39                                                                               | 0.41995 | -0.75                                                                               | 0.14794 | 0.21                                                                                | 0.59460 |
| STM0348         | STM0348   | putative inner membrane protein            | -0.66                                                                              | 0.35386 | 0.50                                                                                | 0.34699 | -0.76                                                                               | 0.25011 |
| STM0348         | STM0348   | putative inner membrane protein            | -0.24                                                                              | 0.80754 | 0.45                                                                                | 0.36784 | 0.34                                                                                | 0.59911 |
| STM0349         | STM0349   | putative outer membrane lipoprotein        | 0.37                                                                               | 0.60319 | 0.48                                                                                | 0.14151 | -1.05                                                                               | 0.21976 |
| STM0349         | STM0349   | putative outer membrane lipoprotein        | 1.42                                                                               | 0.20580 | 0.52                                                                                | 0.15098 | 0.60                                                                                | 0.31004 |
| STM0350,S       | STM0350,S | outer membrane efflux-like protein         | 0.43                                                                               | 0.39843 | 0.19                                                                                | 0.59541 | -0.97                                                                               | 0.03253 |
| STM0350,S       | STM0350,S | outer membrane efflux-like protein         | 1.31                                                                               | 0.05440 | -0.48                                                                               | 0.13950 | 0.76                                                                                | 0.22280 |
| STM0351         | STM0351   | putative cation efflux system protein      | 0.03                                                                               | 0.95941 | -0.23                                                                               | 0.62123 | 0.64                                                                                | 0.20976 |
| STM0351         | STM0351   | putative cation efflux system protein      | 0.64                                                                               | 0.30327 | -0.87                                                                               | 0.04930 | 0.24                                                                                | 0.76688 |
| STM0352,S       | STM0352,S | putative cation efflux pump                | 0.46                                                                               | 0.62037 | -0.57                                                                               | 0.16945 | -0.69                                                                               | 0.15456 |
| STM0352,S       | STM0352,S | putative cation efflux pump                | 1.71                                                                               | 0.10692 | -0.33                                                                               | 0.28209 | 1.13                                                                                | 0.05318 |
| STM0353         | STM0353   | putative cation transport ATPase           | 0.75                                                                               | 0.19430 | 0.59                                                                                | 0.11111 | 0.18                                                                                | 0.63925 |
| STM0353         | STM0353   | putative cation transport ATPase           | 1.99                                                                               | 0.01067 | -0.06                                                                               | 0.92546 | 1.08                                                                                | 0.02143 |
| STM0354         | STM0354   | putative transcriptional regulator         | 0.38                                                                               | 0.48937 | -0.57                                                                               | 0.22710 | -0.42                                                                               | 0.46990 |
| STM0354         | STM0354   | putative transcriptional regulator         | 0.80                                                                               | 0.21947 | -0.63                                                                               | 0.06172 | 0.84                                                                                | 0.19111 |
| STM0355         | STM0355   | putative copper chaperone                  | 0.79                                                                               | 0.16748 | 0.10                                                                                | 0.82392 | -0.24                                                                               | 0.48750 |
| STM0355         | STM0355   | putative copper chaperone                  | 0.84                                                                               | 0.09758 | -0.29                                                                               | 0.35977 | 1.29                                                                                | 0.01732 |
| STM0356         | STM0356   | putative inner membrane protein            | -1.07                                                                              | 0.04939 | -1.17                                                                               | 0.01510 | -0.97                                                                               | 0.10275 |
| STM0356         | STM0356   | putative inner membrane protein            | -1.92                                                                              | 0.10952 | -1.21                                                                               | 0.06340 | -0.97                                                                               | 0.31024 |
| STM0357         | mod       | DNA methylase                              | -0.62                                                                              | 0.20931 | -1.19                                                                               | 0.00960 | -0.74                                                                               | 0.16277 |
| STM0357         | mod       | DNA methylase                              | -0.57                                                                              | 0.24382 | -1.40                                                                               | 0.01337 | -0.47                                                                               | 0.28060 |
| STM0358,S       | res       | DNA restriction enzyme                     | -0.98                                                                              | 0.05113 | -0.27                                                                               | 0.41360 | 0.06                                                                                | 0.90427 |
| STM0358,S       | res       | DNA restriction enzyme                     | 0.47                                                                               | 0.50015 | -0.96                                                                               | 0.01421 | 0.42                                                                                | 0.31469 |
| STM0359         | STM0359   | putative cytoplasmic protein               | 2.08                                                                               | 0.14351 | -1.47                                                                               | 0.00273 | 3.01                                                                                | 0.01520 |
| STM0359         | STM0359   | putative cytoplasmic protein               | 2.05                                                                               | 0.03893 | -1.62                                                                               | 0.01412 | 3.93                                                                                | 0.00072 |
| STM0360         | STM0360   | cytochrome BD2 subunit I                   | -0.78                                                                              | 0.24636 | 0.82                                                                                | 0.06534 | 3.46                                                                                | 0.00019 |
| STM0360         | STM0360   | cytochrome BD2 subunit I                   | -0.88                                                                              | 0.54588 | 0.85                                                                                | 0.02025 | 3.79                                                                                | 0.00010 |
| STM0361         | STM0361   | cytochrome BD2 subunit II                  | -0.72                                                                              | 0.17613 | 0.22                                                                                | 0.56804 | 1.83                                                                                | 0.00458 |
| STM0361         | STM0361   | cytochrome BD2 subunit II                  | 0.35                                                                               | 0.56791 | 0.58                                                                                | 0.06470 | 2.15                                                                                | 0.00176 |
| STM0363         | STM0363   | putative transcriptional regulator         | -0.62                                                                              | 0.26997 | -0.17                                                                               | 0.66465 | -0.41                                                                               | 0.23553 |
| STM0363         | STM0363   | putative transcriptional regulator         | -0.10                                                                              | 0.87342 | 0.98                                                                                | 0.39743 | 0.07                                                                                | 0.91391 |
| STM0364         | foxA      | ferrioxamine receptor                      | -0.09                                                                              | 0.83569 | 0.22                                                                                | 0.52151 | -0.19                                                                               | 0.67083 |
| STM0364         | foxA      | ferrioxamine receptor                      | 0.21                                                                               | 0.85322 | 0.68                                                                                | 0.11127 | 0.04                                                                                | 0.95808 |
| STM0365         | yahN      | putative transport protein                 | -0.08                                                                              | 0.92540 | 0.65                                                                                | 0.08386 | 0.38                                                                                | 0.39159 |
| STM0365         | yahN      | putative transport protein                 | 0.75                                                                               | 0.22959 | 1.25                                                                                | 0.02962 | 0.41                                                                                | 0.44043 |
| STM0366         | yahO      | putative periplasmic protein               | 1.28                                                                               | 0.08459 | 2.60                                                                                | 0.00091 | 4.47                                                                                | 0.00003 |
| STM0366         | yahO      | putative periplasmic protein               | 2.24                                                                               | 0.04942 | 1.97                                                                                | 0.01350 | 5.20                                                                                | 0.00009 |
| STM0367         | prpR      | prp operon regulator                       | -0.53                                                                              | 0.47718 | 1.36                                                                                | 0.00441 | 2.68                                                                                | 0.00049 |
| STM0367         | prpR      | prp operon regulator                       | -0.15                                                                              | 0.91131 | 1.52                                                                                | 0.00289 | 3.10                                                                                | 0.00035 |
| STM0368         | prpB      | putative carboxyphosphoenolpyruvate mutase | 0.72                                                                               | 0.23286 | 1.18                                                                                | 0.00959 | 0.63                                                                                | 0.41099 |
| STM0368         | prpB      | putative carboxyphosphoenolpyruvate mutase | 2.69                                                                               | 0.00720 | 0.92                                                                                | 0.02356 | 2.37                                                                                | 0.00075 |
| STM0369         | prpC      | citrate synthase                           | 1.29                                                                               | 0.02585 | -0.09                                                                               | 0.78135 | -0.35                                                                               | 0.66558 |
| STM0369         | prpC      | citrate synthase                           | 2.07                                                                               | 0.08093 | -0.17                                                                               | 0.69980 | -1.32                                                                               | 0.08818 |
| STM0370         | prpD      | 2-methylcitrate dehydratase                | -0.30                                                                              | 0.54425 | 0.34                                                                                | 0.35860 | 0.47                                                                                | 0.19903 |
| STM0370         | prpD      | 2-methylcitrate dehydratase                | 0.36                                                                               | 0.55398 | -0.95                                                                               | 0.06849 | -1.42                                                                               | 0.01993 |
| STM0371         | prpE      | putative acetyl-CoA synthetase             | -0.66                                                                              | 0.13892 | -0.04                                                                               | 0.90002 | -1.52                                                                               | 0.01242 |
| STM0371         | prpE      | putative acetyl-CoA synthetase             | -0.36                                                                              | 0.44254 | 0.04                                                                                | 0.91712 | -0.22                                                                               | 0.69226 |
| STM0372         | hemB      | delta-aminolevulinic acid dehydratase      | -1.31                                                                              | 0.03755 | 0.16                                                                                | 0.73906 | -0.19                                                                               | 0.84397 |
| STM0372         | hemB      | delta-aminolevulinic acid dehydratase      | -0.95                                                                              | 0.09910 | -0.03                                                                               | 0.92781 | -0.43                                                                               | 0.36642 |
| STM0373         | yaiU      | flagellar protein                          | 0.31                                                                               | 0.47264 | 0.96                                                                                | 0.01854 | 0.24                                                                                | 0.68844 |
| STM0373         | yaiU      | flagellar protein                          | 2.24                                                                               | 0.00983 | 0.56                                                                                | 0.25810 | 1.66                                                                                | 0.00415 |

**Table S2.** Genome-wide expression of *Salmonella enterica* serovar Typhimurium inside fibroblasts

Intracellular WT 24 h p.i.      Intracellular *phoP* 24 h p.i.      Extracellular WT stationary phase

Relative to WT exponential LB      Relative to *phoP* exponential LB      Relative to WT exponential LB



| Systematic name | Gene    | Product                                                | log2Ratio (M) | p value | log2Ratio (M) | p value | log2Ratio (M) | p value |
|-----------------|---------|--------------------------------------------------------|---------------|---------|---------------|---------|---------------|---------|
| STM0374         | yaiV    | putative inner membrane protein                        | 0.48          | 0.37490 | 1.33          | 0.01781 | 1.55          | 0.00673 |
| STM0374         | yaiV    | putative inner membrane protein                        | -0.56         | 0.43412 | 0.63          | 0.14517 | 0.58          | 0.37964 |
| STM0375         | ampH    | penicillin-binding protein                             | 0.26          | 0.62250 | 0.92          | 0.05004 | 1.03          | 0.04274 |
| STM0375         | ampH    | penicillin-binding protein                             | 0.02          | 0.97079 | 0.17          | 0.66878 | 0.27          | 0.61356 |
| STM0376         | sbmA    | putative ABC transporter membrane protein              | -1.23         | 0.15783 | -0.34         | 0.36871 | -1.79         | 0.00293 |
| STM0376         | sbmA    | putative ABC transporter membrane protein              | -0.26         | 0.60234 | -0.17         | 0.58742 | -0.43         | 0.39057 |
| STM0377         | yaiW    | putative outer membrane lipoprotein                    | 1.53          | 0.03932 | 1.40          | 0.01677 | 0.00          | 0.99713 |
| STM0377         | yaiW    | putative outer membrane lipoprotein                    | 2.32          | 0.02126 | 1.09          | 0.01329 | 1.88          | 0.01071 |
| STM0378         | yaiY    | putative inner membrane protein                        | -0.12         | 0.79332 | 1.31          | 0.00628 | 1.84          | 0.00087 |
| STM0378         | yaiY    | putative inner membrane protein                        | 1.73          | 0.03822 | 0.75          | 0.06684 | 2.75          | 0.00031 |
| STM0379         | yaiZ    | putative inner membrane protein                        | -1.21         | 0.06705 | -0.50         | 0.09943 | -1.09         | 0.04261 |
| STM0379         | yaiZ    | putative inner membrane protein                        | 0.53          | 0.41805 | -0.71         | 0.04103 | 0.49          | 0.26081 |
| STM0380         | ddl     | D-alanylalanine synthetase                             | -1.31         | 0.05992 | -0.27         | 0.38705 | -1.29         | 0.00903 |
| STM0380         | ddl     | D-alanylalanine synthetase                             | 0.01          | 0.98879 | -0.31         | 0.42032 | -0.29         | 0.41955 |
| STM0381         | STM0381 | putative inner membrane protein                        | -0.17         | 0.75541 | 0.13          | 0.73603 | 0.58          | 0.14917 |
| STM0381         | STM0381 | putative inner membrane protein                        | 1.31          | 0.19524 | -0.77         | 0.15969 | 3.01          | 0.00026 |
| STM0382         | STM0382 | putative permease                                      | -0.46         | 0.35773 | -0.15         | 0.66753 | -0.04         | 0.93616 |
| STM0382         | STM0382 | putative permease                                      | 0.80          | 0.21751 | 0.25          | 0.49031 | 0.56          | 0.17554 |
| STM0383         | yaiB    | putative cytoplasmic protein                           | 0.03          | 0.97750 | 0.80          | 0.01928 | -1.66         | 0.00357 |
| STM0383         | yaiB    | putative cytoplasmic protein                           | 0.91          | 0.24565 | 0.57          | 0.06592 | -1.84         | 0.01260 |
| STM0384         | psiF    | phosphate starvation-inducible protein                 | 0.29          | 0.52490 | 1.17          | 0.01119 | 1.59          | 0.00827 |
| STM0384         | psiF    | phosphate starvation-inducible protein                 | 1.26          | 0.06515 | 1.64          | 0.00188 | 1.85          | 0.00359 |
| STM0385         | yaiC    | hypothetical protein STM0385                           | -1.18         | 0.06356 | 1.19          | 0.00363 | -1.65         | 0.00322 |
| STM0385         | yaiC    | hypothetical protein STM0385                           | 0.24          | 0.62132 | 1.58          | 0.00129 | -0.44         | 0.27981 |
| STM0386         | proC    | pyrroline-5-carboxylate reductase                      | -1.23         | 0.04896 | 0.80          | 0.02245 | -0.87         | 0.07639 |
| STM0386         | proC    | pyrroline-5-carboxylate reductase                      | -0.34         | 0.56070 | 1.50          | 0.00265 | -0.35         | 0.37083 |
| STM0387         | yaiI    | hypothetical protein STM0387                           | -0.85         | 0.28662 | 0.01          | 0.97744 | -1.63         | 0.00204 |
| STM0387         | yaiI    | hypothetical protein STM0387                           | 0.00          | 0.99790 | -0.20         | 0.61719 | -0.63         | 0.11432 |
| STM0388         | aroL    | shikimate kinase II                                    | -0.38         | 0.41100 | -0.13         | 0.65590 | -0.11         | 0.81576 |
| STM0388         | aroL    | shikimate kinase II                                    | 0.32          | 0.65088 | 0.07          | 0.84409 | 0.07          | 0.89292 |
| STM0389         | yaiA    | putative cytoplasmic protein                           | 0.72          | 0.43575 | -0.14         | 0.80186 | 3.03          | 0.00324 |
| STM0389         | yaiA    | putative cytoplasmic protein                           | 0.23          | 0.75116 | -0.12         | 0.77446 | 3.69          | 0.00008 |
| STM0390         | aroM    | aro operon protein                                     | -0.50         | 0.29095 | 0.72          | 0.05247 | 0.03          | 0.95793 |
| STM0390         | aroM    | aro operon protein                                     | -0.67         | 0.14999 | 0.44          | 0.13791 | 0.27          | 0.51909 |
| STM0391         | yaiE    | putative cytoplasmic protein                           | -0.88         | 0.16390 | -0.12         | 0.78205 | -0.47         | 0.21728 |
| STM0391         | yaiE    | putative cytoplasmic protein                           | -0.37         | 0.62629 | -0.73         | 0.03131 | -0.69         | 0.16286 |
| STM0392         | rdgC    | recombination associated protein                       | 1.36          | 0.35142 | -0.03         | 0.94295 | -1.19         | 0.01343 |
| STM0392         | rdgC    | recombination associated protein                       | 1.73          | 0.13709 | -0.14         | 0.70522 | -0.60         | 0.11037 |
| STM0393         | yajF    | putative sugar kinase/transcriptional regulator        | 0.59          | 0.40496 | -0.08         | 0.87789 | -0.39         | 0.44329 |
| STM0393         | yajF    | putative sugar kinase/transcriptional regulator        | 1.18          | 0.05112 | -0.04         | 0.90114 | 0.73          | 0.08988 |
| STM0394         | araJ    | arabinose polymer transporter                          | -1.51         | 0.03561 | -0.24         | 0.74633 | -0.28         | 0.67325 |
| STM0394         | araJ    | arabinose polymer transporter                          | 0.20          | 0.79689 | -0.51         | 0.20349 | -0.45         | 0.30991 |
| STM0395         | sbC     | ATP-dependent dsDNA exonuclease                        | 1.55          | 0.03520 | -0.45         | 0.18879 | 1.78          | 0.06039 |
| STM0395         | sbC     | ATP-dependent dsDNA exonuclease                        | 2.67          | 0.01099 | -0.02         | 0.97848 | 4.12          | 0.00635 |
| STM0396         | sbC     | ATP-dependent dsDNA exonuclease                        | -1.49         | 0.09643 | -2.38         | 0.00576 | -1.58         | 0.04926 |
| STM0396         | sbC     | ATP-dependent dsDNA exonuclease                        | -0.09         | 0.92838 | -1.15         | 0.00651 | -1.65         | 0.00910 |
| STM0397         | phoB    | response regulator                                     | 0.13          | 0.87342 | -0.05         | 0.89573 | -0.99         | 0.03567 |
| STM0397         | phoB    | response regulator                                     | 1.19          | 0.14307 | -0.21         | 0.73019 | 0.52          | 0.36562 |
| STM0398         | phoR    | sensor kinase                                          | -0.77         | 0.22922 | -0.34         | 0.27983 | -0.47         | 0.67615 |
| STM0398         | phoR    | sensor kinase                                          | -0.18         | 0.72860 | -0.06         | 0.86476 | -0.60         | 0.17762 |
| STM0399         | brnQ    | branched-chain amino acid transporter                  | 1.02          | 0.09456 | -1.01         | 0.04569 | -1.31         | 0.06961 |
| STM0399         | brnQ    | branched-chain amino acid transporter                  | 1.50          | 0.03517 | -1.59         | 0.00165 | -0.10         | 0.85584 |
| STM0400         | proY    | putative proline transporter                           | -2.21         | 0.00929 | -1.85         | 0.00082 | -1.91         | 0.01077 |
| STM0400         | proY    | putative proline transporter                           | -1.98         | 0.00845 | -1.59         | 0.00121 | -1.53         | 0.02184 |
| STM0401         | malZ    | maltodextrin glucosidase                               | -1.31         | 0.03042 | 0.37          | 0.20977 | -1.47         | 0.00292 |
| STM0401         | malZ    | maltodextrin glucosidase                               | -0.67         | 0.19588 | 0.25          | 0.53890 | -1.67         | 0.00211 |
| STM0402         | STM0402 | putative thiol-alkyl hydroperoxide reductase           | -0.64         | 0.19752 | 0.01          | 0.98144 | -2.01         | 0.00193 |
| STM0402         | STM0402 | putative thiol-alkyl hydroperoxide reductase           | -0.31         | 0.56776 | 0.31          | 0.35953 | -1.98         | 0.00804 |
| STM0403         | yajB    | putative cytoplasmic protein                           | -1.07         | 0.03991 | 0.74          | 0.05244 | -1.28         | 0.00750 |
| STM0403         | yajB    | putative cytoplasmic protein                           | -1.04         | 0.07611 | 0.82          | 0.02284 | -1.23         | 0.03288 |
| STM0404         | queA    | S-adenosylmethionine:tRNA ribosyltransferase-isomerase | -1.61         | 0.04046 | -1.66         | 0.00178 | -2.33         | 0.01152 |
| STM0404         | queA    | S-adenosylmethionine:tRNA ribosyltransferase-isomerase | -1.33         | 0.02904 | -1.75         | 0.00068 | -2.43         | 0.00032 |
| STM0405         | tgt     | queueine tRNA-ribosyltransferase                       | -2.46         | 0.00652 | -0.70         | 0.06767 | -3.02         | 0.00012 |
| STM0405         | tgt     | queueine tRNA-ribosyltransferase                       | -1.70         | 0.01523 | -0.57         | 0.11741 | -2.69         | 0.00024 |
| STM0406         | yajC    | preprotein translocase subunit YajC                    | -2.93         | 0.04386 | -1.38         | 0.00480 | -2.86         | 0.00040 |
| STM0406         | yajC    | preprotein translocase subunit YajC                    | -2.85         | 0.00660 | -1.34         | 0.00225 | -3.37         | 0.00011 |
| STM0407         | secD    | protein export protein SecD                            | -2.71         | 0.00547 | -0.98         | 0.01240 | -3.11         | 0.00009 |
| STM0407         | secD    | protein export protein SecD                            | -1.71         | 0.01601 | -0.70         | 0.04112 | -3.50         | 0.00006 |
| STM0408         | secF    | protein export protein SecF                            | -0.43         | 0.57393 | -1.16         | 0.01685 | -1.46         | 0.01917 |
| STM0408         | secF    | protein export protein SecF                            | -0.21         | 0.70070 | -0.96         | 0.00879 | -0.70         | 0.27077 |

**Table S2.** Genome-wide expression of *Salmonella enterica* serovar Typhimurium inside fibroblasts

Intracellular WT 24 h p.i.      Intracellular *phoP* 24 h p.i.      Extracellular WT stationary phase

Relative to WT exponential LB      Relative to *phoP* exponential LB      Relative to WT exponential LB



| Systematic name | Gene    | Product                                          | log2Ratio (M) | p value | log2Ratio (M) | p value | log2Ratio (M) | p value |
|-----------------|---------|--------------------------------------------------|---------------|---------|---------------|---------|---------------|---------|
| STM0409         | STM0409 | hypothetical protein STM0409                     | -1.37         | 0.02652 | -0.01         | 0.97893 | -0.81         | 0.04710 |
| STM0409         | STM0409 | hypothetical protein STM0409                     | -0.91         | 0.06679 | -0.92         | 0.01559 | -1.59         | 0.00299 |
| STM0410         | STM0410 | putative regulatory protein                      | -0.48         | 0.29487 | -0.47         | 0.10751 | -1.34         | 0.03748 |
| STM0410         | STM0410 | putative regulatory protein                      | 0.58          | 0.63775 | -1.44         | 0.00325 | -2.07         | 0.00139 |
| STM0411         | yajD    | putative cytoplasmic protein                     | 0.37          | 0.52230 | 0.11          | 0.74098 | 0.16          | 0.76508 |
| STM0411         | yajD    | putative cytoplasmic protein                     | 0.69          | 0.14806 | -0.29         | 0.33644 | 0.27          | 0.42529 |
| STM0413         | tsx     | nucleoside channel                               | -1.01         | 0.16045 | -3.11         | 0.00005 | -1.81         | 0.00468 |
| STM0413         | tsx     | nucleoside channel                               | -1.47         | 0.03564 | -3.37         | 0.00003 | -2.03         | 0.00449 |
| STM0415         | ybaD    | hypothetical protein STM0415                     | 1.05          | 0.27648 | -0.69         | 0.03275 | -2.54         | 0.00030 |
| STM0415         | ybaD    | hypothetical protein STM0415                     | 0.04          | 0.93748 | -0.67         | 0.02875 | -1.84         | 0.00115 |
| STM0416         | ribD    | pyrimidine deaminase/reductase                   | -0.69         | 0.21970 | 0.17          | 0.62193 | -2.58         | 0.00077 |
| STM0416         | ribD    | pyrimidine deaminase/reductase                   | 0.65          | 0.18603 | 0.07          | 0.82835 | -2.19         | 0.00046 |
| STM0417         | ribH    | riboflavin synthase subunit beta                 | -1.95         | 0.04683 | -1.00         | 0.13117 | -2.21         | 0.00041 |
| STM0417         | ribH    | riboflavin synthase subunit beta                 | -1.57         | 0.12435 | -0.91         | 0.00958 | -1.67         | 0.00288 |
| STM0418         | nusB    | transcription antitermination protein NusB       | -1.64         | 0.16132 | -0.89         | 0.01870 | -0.77         | 0.06251 |
| STM0418         | nusB    | transcription antitermination protein NusB       | -0.52         | 0.52776 | -0.18         | 0.56126 | -1.37         | 0.00484 |
| STM0419         | thiL    | thiamine monophosphate kinase                    | -1.87         | 0.02344 | -1.10         | 0.02389 | -1.47         | 0.03016 |
| STM0419         | thiL    | thiamine monophosphate kinase                    | -0.41         | 0.62911 | -0.69         | 0.06640 | -1.00         | 0.02164 |
| STM0420         | pgpA    | phosphatidylglycerophosphatase A                 | 1.35          | 0.22971 | -0.76         | 0.02560 | 1.30          | 0.28701 |
| STM0420         | pgpA    | phosphatidylglycerophosphatase A                 | -0.20         | 0.69574 | -0.72         | 0.05669 | 2.04          | 0.07640 |
| STM0421         | yajO    | putative oxidoreductase                          | -1.42         | 0.07255 | 0.56          | 0.08398 | 0.64          | 0.18087 |
| STM0421         | yajO    | putative oxidoreductase                          | 0.52          | 0.36796 | -0.49         | 0.11018 | 0.83          | 0.03721 |
| STM0422         | dxs     | 1-deoxy-D-xylulose-5-phosphate synthase          | -1.24         | 0.02764 | -0.47         | 0.11313 | -0.34         | 0.33091 |
| STM0422         | dxs     | 1-deoxy-D-xylulose-5-phosphate synthase          | -0.68         | 0.15730 | -0.46         | 0.29246 | 0.26          | 0.60289 |
| STM0423         | ispA    | geranyltranstransferase                          | -3.00         | 0.00562 | -0.95         | 0.06729 | -2.95         | 0.00157 |
| STM0423         | ispA    | geranyltranstransferase                          | -1.48         | 0.03472 | -0.66         | 0.12181 | -2.01         | 0.00120 |
| STM0424         | xseB    | exodeoxyribonuclease VII small subunit           | -2.45         | 0.00686 | -0.93         | 0.02038 | -2.56         | 0.00016 |
| STM0424         | xseB    | exodeoxyribonuclease VII small subunit           | -2.55         | 0.11638 | -1.09         | 0.01617 | -1.52         | 0.04031 |
| STM0425         | thiI    | thiamine biosynthesis protein ThiI               | -1.38         | 0.02981 | -1.96         | 0.01470 | -1.71         | 0.05944 |
| STM0425         | thiI    | thiamine biosynthesis protein ThiI               | -1.19         | 0.03368 | -1.95         | 0.00177 | -1.05         | 0.06469 |
| STM0426         | phnV    | 2-aminoethylphosphonate transporter              | -0.44         | 0.42560 | -0.19         | 0.56652 | -0.47         | 0.42059 |
| STM0426         | phnV    | 2-aminoethylphosphonate transporter              | 0.70          | 0.27648 | -0.10         | 0.75076 | -0.25         | 0.64205 |
| STM0427         | phnU    | 2-aminoethylphosphonate transporter              | 0.43          | 0.35443 | -0.90         | 0.01472 | -0.49         | 0.31629 |
| STM0427         | phnU    | 2-aminoethylphosphonate transporter              | 1.33          | 0.10320 | -0.58         | 0.23974 | 0.13          | 0.85046 |
| STM0428         | phnT    | 2-aminoethylphosphonate transporter              | -0.07         | 0.89100 | -0.82         | 0.11819 | -0.13         | 0.83871 |
| STM0428         | phnT    | 2-aminoethylphosphonate transporter              | 2.07          | 0.18821 | 0.04          | 0.90708 | -0.54         | 0.50224 |
| STM0429         | phnS    | 2-aminoethylphosphonate transporter              | -0.70         | 0.16453 | 0.19          | 0.69823 | -0.48         | 0.21286 |
| STM0429         | phnS    | 2-aminoethylphosphonate transporter              | -0.29         | 0.63974 | -0.63         | 0.16425 | -0.44         | 0.48253 |
| STM0430         | phnR    | 2-aminoethylphosphonate transport protein        | 0.98          | 0.06603 | 0.20          | 0.61067 | 0.95          | 0.04051 |
| STM0430         | phnR    | 2-aminoethylphosphonate transport protein        | 1.83          | 0.01196 | -0.23         | 0.46667 | -0.24         | 0.62725 |
| STM0431         | phnW    | 2-aminoethylphosphonate transport                | -0.94         | 0.07579 | 1.43          | 0.00158 | 1.96          | 0.00395 |
| STM0431         | phnW    | 2-aminoethylphosphonate transport                | 0.17          | 0.87614 | 1.70          | 0.02399 | 2.96          | 0.00040 |
| STM0432         | phnX    | 2-aminoethylphosphonate transport                | -0.36         | 0.64858 | -0.67         | 0.13146 | -0.60         | 0.12932 |
| STM0432         | phnX    | 2-aminoethylphosphonate transport                | 0.97          | 0.05384 | -0.59         | 0.23567 | 0.66          | 0.08244 |
| STM0433         | thiJ    | 4-methyl-5(beta-hydroxyethyl)-thiazole synthesis | -0.38         | 0.39644 | -0.07         | 0.91723 | -0.76         | 0.22760 |
| STM0433         | thiJ    | 4-methyl-5(beta-hydroxyethyl)-thiazole synthesis | 0.71          | 0.31214 | -1.13         | 0.00925 | 0.62          | 0.27486 |
| STM0434         | apbA    | 2-dehydropantoate 2-reductase                    | -0.15         | 0.81981 | 0.11          | 0.73090 | 1.45          | 0.04323 |
| STM0434         | apbA    | 2-dehydropantoate 2-reductase                    | -0.63         | 0.40342 | 0.40          | 0.26213 | 0.43          | 0.42137 |
| STM0435         | yajQ    | hypothetical protein STM0435                     | 0.42          | 0.62257 | -0.16         | 0.70071 | 0.18          | 0.73640 |
| STM0435         | yajQ    | hypothetical protein STM0435                     | 1.29          | 0.18327 | 0.33          | 0.41103 | 0.60          | 0.16953 |
| STM0436,S       | yajR    | putative transport protein                       | -0.56         | 0.38349 | 0.79          | 0.01940 | 0.22          | 0.62089 |
| STM0436,S       | yajR    | putative transport protein                       | 0.15          | 0.81805 | 0.30          | 0.35602 | 1.14          | 0.04051 |
| STM0437         | STM0437 | putative periplasmic protein                     | -0.56         | 0.19427 | -0.18         | 0.55274 | -0.80         | 0.14345 |
| STM0437         | STM0437 | putative periplasmic protein                     | 0.80          | 0.24508 | 0.25          | 0.53204 | 0.31          | 0.53309 |
| STM0438         | STM0438 | tetratricopeptide repeat protein                 | -1.37         | 0.13407 | -2.09         | 0.00015 | -1.28         | 0.01750 |
| STM0438         | STM0438 | tetratricopeptide repeat protein                 | -2.30         | 0.00686 | -1.95         | 0.00033 | -1.77         | 0.00150 |
| STM0439         | cyoE    | protoheme IX farnesyltransferase                 | -3.45         | 0.00593 | -2.78         | 0.00012 | -1.21         | 0.00885 |
| STM0439         | cyoE    | protoheme IX farnesyltransferase                 | -2.53         | 0.00674 | -2.68         | 0.00005 | -1.30         | 0.01233 |
| STM0440         | cyoD    | cytochrome o ubiquinol oxidase subunit IV        | -4.68         | 0.00500 | -2.68         | 0.00006 | -2.00         | 0.00140 |
| STM0440         | cyoD    | cytochrome o ubiquinol oxidase subunit IV        | -4.30         | 0.00512 | -2.36         | 0.00020 | -2.03         | 0.00093 |
| STM0441         | cyoC    | cytochrome o ubiquinol oxidase subunit III       | -3.80         | 0.00547 | -3.20         | 0.00003 | -1.91         | 0.00252 |
| STM0441         | cyoC    | cytochrome o ubiquinol oxidase subunit III       | -4.01         | 0.00514 | -3.12         | 0.00004 | -1.84         | 0.00264 |
| STM0442         | cyoB    | cytochrome o ubiquinol oxidase subunit I         | -3.65         | 0.00547 | -2.07         | 0.00033 | -1.59         | 0.01098 |
| STM0442         | cyoB    | cytochrome o ubiquinol oxidase subunit I         | -2.67         | 0.00750 | -2.12         | 0.00038 | -1.28         | 0.00467 |
| STM0443         | cyoA    | cytochrome o ubiquinol oxidase subunit II        | -3.56         | 0.00623 | -1.25         | 0.00986 | -1.04         | 0.01961 |
| STM0443         | cyoA    | cytochrome o ubiquinol oxidase subunit II        | -2.42         | 0.00971 | -1.38         | 0.00406 | -0.68         | 0.08398 |
| STM0444         | ampG    | muropeptide transporter                          | -1.39         | 0.07746 | -2.08         | 0.00024 | -1.87         | 0.00256 |
| STM0444         | ampG    | muropeptide transporter                          | -1.04         | 0.05496 | -2.01         | 0.00048 | -0.69         | 0.18435 |
| STM0445         | yajG    | putative lipoprotein                             | -3.46         | 0.00727 | -1.27         | 0.00257 | -2.00         | 0.00079 |
| STM0445         | yajG    | putative lipoprotein                             | -2.53         | 0.00719 | -1.67         | 0.00054 | -2.14         | 0.00199 |

**Table S2.** Genome-wide expression of *Salmonella enterica* serovar Typhimurium inside fibroblasts

Intracellular WT 24 h p.i.      Intracellular *phoP* 24 h p.i.      Extracellular WT stationary phase

Relative to WT exponential LB      Relative to *phoP* exponential LB      Relative to WT exponential LB



| Systematic name | Gene    | Product                                                | log2Ratio (M) | p value | log2Ratio (M) | p value | log2Ratio (M) | p value |
|-----------------|---------|--------------------------------------------------------|---------------|---------|---------------|---------|---------------|---------|
| STM0446         | bolA    | putative regulatory protein                            | -1.83         | 0.01091 | -1.43         | 0.00151 | 0.79          | 0.03927 |
| STM0446         | bolA    | putative regulatory protein                            | -2.32         | 0.00711 | -1.41         | 0.00152 | 0.65          | 0.07893 |
| STM0447         | tig     | trigger factor                                         | -3.34         | 0.01443 | -1.25         | 0.01031 | -3.66         | 0.00168 |
| STM0447         | tig     | trigger factor                                         | -1.21         | 0.54601 | -1.07         | 0.01142 | -1.42         | 0.00578 |
| STM0448         | clpP    | ATP-dependent Clp protease proteolytic subunit         | -1.27         | 0.08555 | 0.40          | 0.31174 | -1.25         | 0.00587 |
| STM0448         | clpP    | ATP-dependent Clp protease proteolytic subunit         | -0.88         | 0.09171 | 0.64          | 0.07852 | -0.76         | 0.07265 |
| STM0449         | clpX    | ATP-dependent protease ATP-binding subunit             | -0.92         | 0.06522 | 0.25          | 0.42355 | -0.47         | 0.17588 |
| STM0449         | clpX    | ATP-dependent protease ATP-binding subunit             | -0.28         | 0.55401 | 0.27          | 0.43078 | 0.29          | 0.52429 |
| STM0450         | lon     | ATP-dependent protease Lon                             | -2.51         | 0.03408 | 0.01          | 0.96580 | -1.70         | 0.00185 |
| STM0450         | lon     | ATP-dependent protease Lon                             | -1.77         | 0.03005 | 0.15          | 0.64580 | -1.96         | 0.00082 |
| STM0451         | hupB    | DNA-binding protein HU-beta                            | -1.63         | 0.05468 | 0.64          | 0.08965 | -2.64         | 0.00031 |
| STM0451         | hupB    | DNA-binding protein HU-beta                            | -1.31         | 0.09445 | 0.42          | 0.24847 | -1.92         | 0.00328 |
| STM0452         | cypD    | peptidyl-prolyl isomerase                              | 0.61          | 0.76451 | -1.35         | 0.03050 | -0.11         | 0.85903 |
| STM0452         | cypD    | peptidyl-prolyl isomerase                              | -0.95         | 0.49184 | -1.17         | 0.06810 | -0.65         | 0.38265 |
| STM0453         | ybaV    | putative DNA uptake protein                            | 0.18          | 0.79350 | -0.29         | 0.37488 | -0.53         | 0.27915 |
| STM0453         | ybaV    | putative DNA uptake protein                            | 1.63          | 0.02541 | -0.07         | 0.81944 | 0.89          | 0.20339 |
| STM0454         | ybaW    | putative esterase                                      | 0.62          | 0.30493 | -0.55         | 0.18269 | 1.44          | 0.00815 |
| STM0454         | ybaW    | putative esterase                                      | 1.48          | 0.02260 | -0.53         | 0.17418 | 2.01          | 0.00274 |
| STM0455         | ybaX    | putative aluminum resistance protein                   | -0.81         | 0.23242 | -0.21         | 0.46588 | -0.79         | 0.24881 |
| STM0455         | ybaX    | putative aluminum resistance protein                   | 0.54          | 0.21875 | -0.99         | 0.03721 | 0.20          | 0.74006 |
| STM0456         | ybaE    | putative ABC transporter periplasmic binding protein   | 0.53          | 0.36089 | -1.23         | 0.05097 | -0.19         | 0.78401 |
| STM0456         | ybaE    | putative ABC transporter periplasmic binding protein   | 0.98          | 0.05591 | -0.26         | 0.39323 | 0.80          | 0.09927 |
| STM0457         | cof     | putative hydrolase                                     | -0.98         | 0.08544 | 0.21          | 0.63320 | 0.05          | 0.94087 |
| STM0457         | cof     | putative hydrolase                                     | 1.43          | 0.03770 | 1.82          | 0.00813 | 3.22          | 0.00142 |
| STM0458         | STM0458 | putative cysteine synthase/cystathionine beta-synthase | 0.68          | 0.48579 | 0.88          | 0.04255 | -0.37         | 0.41225 |
| STM0458         | STM0458 | putative cysteine synthase/cystathionine beta-synthase | 1.75          | 0.01184 | 0.14          | 0.76386 | 0.66          | 0.44676 |
| STM0459         | ybaO    | putative transcriptional regulator                     | 1.43          | 0.21280 | 0.18          | 0.61387 | 0.95          | 0.10017 |
| STM0459         | ybaO    | putative transcriptional regulator                     | 1.29          | 0.08322 | 0.95          | 0.01173 | -0.10         | 0.81397 |
| STM0460         | mdlA    | ATP-binding component                                  | -0.36         | 0.45621 | -0.13         | 0.69598 | -1.14         | 0.01102 |
| STM0460         | mdlA    | ATP-binding component                                  | -0.17         | 0.74986 | -0.20         | 0.55604 | -1.39         | 0.01206 |
| STM0461         | mdlB    | putative transporter                                   | 0.83          | 0.27794 | 0.14          | 0.66751 | 0.57          | 0.25040 |
| STM0461         | mdlB    | putative transporter                                   | 2.82          | 0.01081 | -0.10         | 0.74627 | 1.50          | 0.12110 |
| STM0462         | glnK    | nitrogen regulatory protein P-II 2                     | -1.83         | 0.03095 | -0.42         | 0.19130 | -0.49         | 0.26255 |
| STM0462         | glnK    | nitrogen regulatory protein P-II 2                     | -0.75         | 0.13497 | -1.77         | 0.00232 | 0.92          | 0.05677 |
| STM0463         | amtB    | putative ammonium transport protein                    | 0.24          | 0.78825 | 0.20          | 0.51983 | 0.40          | 0.52786 |
| STM0463         | amtB    | putative ammonium transport protein                    | 1.11          | 0.04102 | -0.62         | 0.11222 | 0.29          | 0.53505 |
| STM0464         | tesB    | acyl-CoA thioesterase II                               | -0.45         | 0.61561 | 0.32          | 0.41528 | 0.33          | 0.32882 |
| STM0464         | tesB    | acyl-CoA thioesterase II                               | 0.14          | 0.78214 | 0.00          | 0.99752 | 1.16          | 0.00999 |
| STM0465         | ybaY    | hypothetical protein STM0465                           | -0.25         | 0.72164 | 2.73          | 0.00074 | 4.18          | 0.00003 |
| STM0465         | ybaY    | hypothetical protein STM0465                           | 2.13          | 0.34198 | 2.62          | 0.00014 | 4.80          | 0.00004 |
| STM0466         | ybaZ    | putative methyltransferase                             | -1.37         | 0.18480 | 0.22          | 0.64511 | 0.59          | 0.37515 |
| STM0466         | ybaZ    | putative methyltransferase                             | 0.97          | 0.21801 | -0.20         | 0.59214 | 1.42          | 0.00653 |
| STM0467         | ffs     | STM0467                                                | -0.87         | 0.24494 | 0.83          | 0.07668 | 3.69          | 0.00132 |
| STM0467         | ffs     | STM0467                                                | -0.42         | 0.43492 | 0.82          | 0.12560 | 4.21          | 0.00024 |
| STM0468         | ylaB    | hypothetical protein STM0468                           | 0.98          | 0.37989 | 1.39          | 0.16175 | 1.68          | 0.01522 |
| STM0468         | ylaB    | hypothetical protein STM0468                           | 0.73          | 0.29186 | -0.22         | 0.51177 | 1.96          | 0.00066 |
| STM0469         | rpmE2   | 50S ribosomal protein L31                              | -0.54         | 0.24474 | -0.14         | 0.67544 | -0.20         | 0.58283 |
| STM0469         | rpmE2   | 50S ribosomal protein L31                              | -0.60         | 0.37992 | -0.11         | 0.75037 | 0.78          | 0.05040 |
| STM0470         | rpmJ2   | 50S ribosomal protein L36                              | -0.52         | 0.44035 | 0.21          | 0.49106 | 0.59          | 0.20668 |
| STM0470         | rpmJ2   | 50S ribosomal protein L36                              | 0.11          | 0.85417 | 0.70          | 0.06235 | 1.24          | 0.00591 |
| STM0471         | ylaC    | putative inner membrane protein                        | -1.14         | 0.27274 | -0.80         | 0.04069 | -0.90         | 0.06021 |
| STM0471         | ylaC    | putative inner membrane protein                        | -1.77         | 0.01445 | -1.42         | 0.00296 | -0.77         | 0.04247 |
| STM0472         | maa     | maltose O-acetyltransferase                            | -0.86         | 0.07678 | 0.42          | 0.19865 | -0.32         | 0.60846 |
| STM0472         | maa     | maltose O-acetyltransferase                            | -0.10         | 0.82483 | 0.36          | 0.20794 | 0.10          | 0.81283 |
| STM0473         | hha     | hemolysin expression-modulating protein                | -1.60         | 0.07375 | -1.03         | 0.02929 | -0.28         | 0.53127 |
| STM0473         | hha     | hemolysin expression-modulating protein                | -0.15         | 0.75132 | -0.02         | 0.95396 | 0.37          | 0.31439 |
| STM0474         | ybaJ    | putative cytoplasmic protein                           | -2.31         | 0.01652 | -1.22         | 0.00834 | 0.06          | 0.91578 |
| STM0474         | ybaJ    | putative cytoplasmic protein                           | -1.92         | 0.05319 | -1.10         | 0.00389 | -0.26         | 0.58898 |
| STM0475         | acrB    | acridine efflux pump                                   | -1.49         | 0.02459 | -0.94         | 0.08090 | -1.53         | 0.02990 |
| STM0475         | acrB    | acridine efflux pump                                   | 0.46          | 0.64534 | -0.97         | 0.02165 | -1.85         | 0.00714 |
| STM0476         | acrA    | acridine efflux pump                                   | -1.80         | 0.03476 | -0.74         | 0.04481 | -2.40         | 0.00033 |
| STM0476         | acrA    | acridine efflux pump                                   | -0.34         | 0.46047 | -0.55         | 0.11596 | -1.90         | 0.00333 |
| STM0477         | acrR    | acrAB operon repressor                                 | -0.52         | 0.22121 | -1.49         | 0.00110 | -1.05         | 0.01384 |
| STM0477         | acrR    | acrAB operon repressor                                 | 0.70          | 0.26456 | -0.98         | 0.01674 | 0.03          | 0.94831 |
| STM0478         | aefA    | putative small-conductance mechanosensitive channel    | 1.80          | 0.02522 | 0.33          | 0.34862 | 0.14          | 0.83913 |
| STM0478         | aefA    | putative small-conductance mechanosensitive channel    | 2.69          | 0.01799 | -0.29         | 0.39550 | 2.18          | 0.00463 |
| STM0479         | STM0479 | putative transposase                                   | 0.85          | 0.42371 | 0.69          | 0.06615 | -0.49         | 0.20005 |
| STM0479         | STM0479 | putative transposase                                   | 1.27          | 0.29343 | 0.63          | 0.04154 | 0.11          | 0.81189 |
| STM0480         | ybaM    | putative inner membrane protein                        | -1.47         | 0.06354 | 0.62          | 0.10056 | -0.21         | 0.75170 |
| STM0480         | ybaM    | putative inner membrane protein                        | -0.46         | 0.28111 | -0.37         | 0.22915 | -0.08         | 0.89430 |

**Table S2.** Genome-wide expression of *Salmonella enterica* serovar Typhimurium inside fibroblasts

Intracellular WT 24 h p.i.      Intracellular *phoP* 24 h p.i.      Extracellular WT stationary phase

Relative to WT exponential LB      Relative to *phoP* exponential LB      Relative to WT exponential LB



| Systematic name | Gene    | Product                                                 | log2Ratio (M) | p value | log2Ratio (M) | p value | log2Ratio (M) | p value |
|-----------------|---------|---------------------------------------------------------|---------------|---------|---------------|---------|---------------|---------|
| STM0481         | priC    | primosomal replication protein N                        | -0.30         | 0.57315 | 1.07          | 0.00990 | -0.75         | 0.05478 |
| STM0481         | priC    | primosomal replication protein N                        | 1.30          | 0.04229 | 0.85          | 0.01515 | 1.14          | 0.11713 |
| STM0482         | ybaN    | hypothetical protein STM0482                            | 0.32          | 0.68267 | -0.35         | 0.25079 | -0.84         | 0.04148 |
| STM0482         | ybaN    | hypothetical protein STM0482                            | 0.02          | 0.98029 | 0.15          | 0.65535 | -0.38         | 0.53861 |
| STM0483         | apt     | adenine phosphoribosyltransferase                       | -0.87         | 0.08286 | -1.49         | 0.00166 | -1.78         | 0.00430 |
| STM0483         | apt     | adenine phosphoribosyltransferase                       | 1.33          | 0.41844 | -1.66         | 0.00167 | -1.31         | 0.05483 |
| STM0484         | dnaX    | DNA polymerase III subunits gamma and tau               | -2.83         | 0.00547 | -1.29         | 0.00340 | -3.17         | 0.00013 |
| STM0484         | dnaX    | DNA polymerase III subunits gamma and tau               | -1.52         | 0.02586 | -0.91         | 0.01829 | -2.15         | 0.00128 |
| STM0485         | ybaB    | hypothetical protein STM0485                            | -2.57         | 0.01382 | -1.70         | 0.00145 | -2.96         | 0.00011 |
| STM0485         | ybaB    | hypothetical protein STM0485                            | -2.82         | 0.00673 | -1.87         | 0.00078 | -2.60         | 0.00024 |
| STM0486         | recR    | recombination protein RecR                              | -3.28         | 0.00547 | -1.55         | 0.02177 | -3.83         | 0.00010 |
| STM0486         | recR    | recombination protein RecR                              | -2.06         | 0.00800 | -1.45         | 0.00269 | -3.99         | 0.00004 |
| STM0487,S       | htpG    | heat shock protein 90                                   | -2.39         | 0.00689 | -0.32         | 0.27253 | -2.23         | 0.01239 |
| STM0487,S       | htpG    | heat shock protein 90                                   | -1.26         | 0.06338 | -0.85         | 0.02174 | -2.20         | 0.01544 |
| STM0488         | adk     | adenylate kinase                                        | -1.45         | 0.01955 | -2.12         | 0.00021 | -3.06         | 0.00092 |
| STM0488         | adk     | adenylate kinase                                        | -0.60         | 0.47566 | -1.73         | 0.00099 | -4.42         | 0.00195 |
| STM0489         | hemH    | ferrochelatase                                          | -1.22         | 0.03417 | -1.20         | 0.02350 | -0.19         | 0.67500 |
| STM0489         | hemH    | ferrochelatase                                          | -1.27         | 0.24964 | -0.94         | 0.03016 | -0.09         | 0.84640 |
| STM0490         | aes     | acetyl esterase                                         | -1.21         | 0.02988 | -1.16         | 0.04585 | -0.65         | 0.22399 |
| STM0490         | aes     | acetyl esterase                                         | -0.12         | 0.88003 | -1.55         | 0.00149 | -0.35         | 0.45824 |
| STM0491         | gsk     | inosine-guanosine kinase                                | -0.96         | 0.06515 | -0.51         | 0.17363 | -1.95         | 0.00158 |
| STM0491         | gsk     | inosine-guanosine kinase                                | -0.08         | 0.91869 | -0.30         | 0.37457 | -0.93         | 0.02125 |
| STM0492         | ybaL    | putative transport protein                              | 0.19          | 0.75846 | 0.10          | 0.78133 | -1.37         | 0.03100 |
| STM0492         | ybaL    | putative transport protein                              | 0.46          | 0.26563 | -0.32         | 0.27097 | -0.56         | 0.25414 |
| STM0493         | fsr     | putative transport protein                              | -0.38         | 0.36488 | -1.22         | 0.00624 | -0.90         | 0.17558 |
| STM0493         | fsr     | putative transport protein                              | 0.38          | 0.46285 | -0.83         | 0.02997 | -0.61         | 0.35381 |
| STM0494         | ushA    | UDP-sugar hydrolase/5'-nucleotidase                     | 2.51          | 0.02702 | -0.75         | 0.05975 | -1.46         | 0.04472 |
| STM0494         | ushA    | UDP-sugar hydrolase/5'-nucleotidase                     | 2.46          | 0.01620 | -0.47         | 0.15303 | -1.66         | 0.00462 |
| STM0495         | ybaK    | putative cytoplasmic protein                            | -1.55         | 0.02952 | -0.68         | 0.16386 | -0.94         | 0.07773 |
| STM0495         | ybaK    | putative cytoplasmic protein                            | -2.46         | 0.01196 | -0.73         | 0.03607 | -2.32         | 0.00904 |
| STM0496         | ybaP    | putative cytoplasmic protein                            | -0.42         | 0.38345 | 0.04          | 0.90424 | -1.86         | 0.01077 |
| STM0496         | ybaP    | putative cytoplasmic protein                            | -0.19         | 0.68727 | 0.15          | 0.68815 | -0.55         | 0.35226 |
| STM0497         | STM0497 | putative periplasmic protein                            | 0.03          | 0.96628 | 0.79          | 0.03108 | 0.05          | 0.90469 |
| STM0497         | STM0497 | putative periplasmic protein                            | 0.71          | 0.14817 | -0.41         | 0.31168 | -0.32         | 0.67714 |
| STM0498         | copA    | putative copper-transporting ATPase                     | -0.14         | 0.77241 | -0.28         | 0.50433 | 0.72          | 0.26761 |
| STM0498         | copA    | putative copper-transporting ATPase                     | 0.67          | 0.22605 | -0.62         | 0.05812 | 1.07          | 0.34919 |
| STM0499         | cueR    | putative heavy metal transcriptional repressor          | -0.22         | 0.58088 | 0.64          | 0.07248 | 0.44          | 0.24645 |
| STM0499         | cueR    | putative heavy metal transcriptional repressor          | -0.19         | 0.76786 | 0.10          | 0.73996 | 1.42          | 0.00692 |
| STM0500         | ybbJ    | hypothetical protein STM0500                            | -0.15         | 0.73633 | 0.16          | 0.73681 | 0.36          | 0.35142 |
| STM0500         | ybbJ    | hypothetical protein STM0500                            | 1.21          | 0.29259 | -0.15         | 0.67909 | -0.03         | 0.93900 |
| STM0501         | ybbK    | putative inner membrane protein                         | -1.18         | 0.04212 | -0.42         | 0.16007 | -0.48         | 0.40701 |
| STM0501         | ybbK    | putative inner membrane protein                         | -0.18         | 0.75358 | -0.49         | 0.13098 | 0.09          | 0.85584 |
| STM0502         | ybbL    | putative ABC-type sugar/spermidine/putrescine transport | 0.48          | 0.28178 | -0.67         | 0.03317 | 0.00          | 0.99711 |
| STM0502         | ybbL    | putative ABC-type sugar/spermidine/putrescine transport | 0.39          | 0.34102 | -0.48         | 0.15103 | -0.09         | 0.84786 |
| STM0503         | ybbM    | putative transport protein                              | -2.35         | 0.00686 | -0.43         | 0.16536 | -1.11         | 0.10361 |
| STM0503         | ybbM    | putative transport protein                              | -1.42         | 0.03975 | -0.35         | 0.20042 | -1.32         | 0.01414 |
| STM0504         | ybbN    | putative thioredoxin protein                            | -1.52         | 0.03330 | -1.10         | 0.02570 | -2.28         | 0.00091 |
| STM0504         | ybbN    | putative thioredoxin protein                            | -0.74         | 0.15162 | -0.33         | 0.27368 | -2.38         | 0.00051 |
| STM0505         | ybbO    | short chain dehydrogenase                               | -1.08         | 0.07769 | 0.06          | 0.86854 | -2.57         | 0.00217 |
| STM0505         | ybbO    | short chain dehydrogenase                               | -0.64         | 0.18323 | 0.29          | 0.36230 | -1.81         | 0.00186 |
| STM0506         | tesA    | multifunctional acyl-CoA thioesterase I                 | -0.53         | 0.32756 | -0.15         | 0.63567 | -1.39         | 0.00563 |
| STM0506         | tesA    | multifunctional acyl-CoA thioesterase I                 | -0.33         | 0.53112 | -0.53         | 0.11520 | -1.04         | 0.03728 |
| STM0507         | ybbA    | putative transporter                                    | 0.80          | 0.12256 | 1.99          | 0.00120 | -0.79         | 0.04422 |
| STM0507         | ybbA    | putative transporter                                    | 2.35          | 0.02110 | 1.96          | 0.00304 | -0.72         | 0.22406 |
| STM0508         | ybbP    | putative inner membrane protein                         | 0.77          | 0.35080 | 0.01          | 0.98165 | -1.28         | 0.00808 |
| STM0508         | ybbP    | putative inner membrane protein                         | 1.73          | 0.05730 | -0.42         | 0.19331 | 0.04          | 0.92782 |
| STM0509         | STM0509 | putative outer membrane protein                         | -0.47         | 0.33859 | 0.05          | 0.90452 | 0.28          | 0.62089 |
| STM0509         | STM0509 | putative outer membrane protein                         | 0.31          | 0.58887 | 0.54          | 0.06736 | 1.14          | 0.04685 |
| STM0510         | sfbA    | putative ABC-type transport system ATPase component     | 0.10          | 0.86862 | 2.07          | 0.00078 | -0.69         | 0.21938 |
| STM0510         | sfbA    | putative ABC-type transport system ATPase component     | 1.47          | 0.13620 | 1.92          | 0.00363 | 0.98          | 0.03295 |
| STM0511         | sfbB    | putative ABC-type transport system ATPase component     | -0.27         | 0.50374 | 0.71          | 0.03792 | -0.38         | 0.45514 |
| STM0511         | sfbB    | putative ABC-type transport system ATPase component     | -0.30         | 0.48170 | 0.47          | 0.34067 | 0.47          | 0.19372 |
| STM0512         | sfbC    | putative ABC transporter permease component             | -1.23         | 0.14813 | 0.07          | 0.84941 | -1.03         | 0.14038 |
| STM0512         | sfbC    | putative ABC transporter permease component             | 0.02          | 0.97265 | 0.31          | 0.43844 | -0.44         | 0.24222 |
| STM0513         | ybbB    | putative ATPase                                         | -1.47         | 0.03666 | -0.28         | 0.47269 | -0.49         | 0.34280 |
| STM0513         | ybbB    | putative ATPase                                         | -0.34         | 0.44779 | -0.14         | 0.68835 | -1.20         | 0.00930 |
| STM0514         | ybbS    | putative transcriptional regulator                      | 0.36          | 0.42780 | 0.37          | 0.38981 | -0.45         | 0.43356 |
| STM0514         | ybbS    | putative transcriptional regulator                      | 1.01          | 0.10271 | 0.45          | 0.24760 | 0.57          | 0.19098 |
| STM0515         | allA    | ureidoglycolate hydrolase                               | 0.77          | 0.15347 | 0.24          | 0.52222 | -0.67         | 0.49644 |
| STM0515         | allA    | ureidoglycolate hydrolase                               | 1.21          | 0.10913 | 0.43          | 0.19802 | 0.73          | 0.10364 |

**Table S2.** Genome-wide expression of *Salmonella enterica* serovar Typhimurium inside fibroblasts

Intracellular WT 24 h p.i.      Intracellular *phoP* 24 h p.i.      Extracellular WT stationary phase

Relative to WT exponential LB      Relative to *phoP* exponential LB      Relative to WT exponential LB



| Systematic name | Gene    | Product                                                    | log2Ratio (M) | p value | log2Ratio (M) | p value | log2Ratio (M) | p value |
|-----------------|---------|------------------------------------------------------------|---------------|---------|---------------|---------|---------------|---------|
| STM0516         | allR    | putative regulatory protein                                | 1.21          | 0.13705 | 0.43          | 0.16351 | -0.44         | 0.38396 |
| STM0516         | allR    | putative regulatory protein                                | 2.27          | 0.00738 | 0.83          | 0.02896 | 1.15          | 0.03238 |
| STM0517         | gcl     | glyoxylate carboligase                                     | 0.52          | 0.26680 | 0.57          | 0.09286 | 0.76          | 0.17998 |
| STM0517         | gcl     | glyoxylate carboligase                                     | 2.69          | 0.00661 | -0.26         | 0.47601 | 2.27          | 0.00065 |
| STM0518         | gip     | glyoxylate-induced protein                                 | -0.71         | 0.22921 | -0.68         | 0.14741 | 0.24          | 0.84467 |
| STM0518         | gip     | glyoxylate-induced protein                                 | -0.32         | 0.68440 | -0.04         | 0.94003 | -0.20         | 0.61903 |
| STM0519         | glxR    | tartronic semialdehyde reductase                           | 0.36          | 0.61745 | -0.11         | 0.87322 | 0.93          | 0.06654 |
| STM0519         | glxR    | tartronic semialdehyde reductase                           | 0.18          | 0.81771 | -1.41         | 0.01696 | 1.97          | 0.00427 |
| STM0520         | STM0520 | putative permease                                          | -0.16         | 0.82172 | -0.96         | 0.06167 | -0.12         | 0.87234 |
| STM0520         | STM0520 | putative permease                                          | -0.53         | 0.65942 | -0.93         | 0.06469 | 0.63          | 0.13627 |
| STM0522         | allP    | putative allantoin transport protein                       | 0.24          | 0.70143 | 0.41          | 0.23284 | 1.46          | 0.00487 |
| STM0522         | allP    | putative allantoin transport protein                       | 0.38          | 0.76831 | 0.35          | 0.38897 | 1.61          | 0.00203 |
| STM0523         | allB    | allantoinase                                               | 2.74          | 0.02948 | 0.53          | 0.41443 | 3.00          | 0.05401 |
| STM0523         | allB    | allantoinase                                               | 0.98          | 0.26266 | -0.68         | 0.07647 | 0.56          | 0.50812 |
| STM0524         | ybbY    | putative transport protein                                 | 2.52          | 0.35102 | -0.34         | 0.50368 | 1.17          | 0.24937 |
| STM0524         | ybbY    | putative transport protein                                 | 0.00          | 0.99547 | -1.30         | 0.03098 | 1.80          | 0.11140 |
| STM0525         | glxK    | glycerate kinase II                                        | -0.14         | 0.81959 | -0.52         | 0.18066 | -0.25         | 0.75248 |
| STM0525         | glxK    | glycerate kinase II                                        | 0.74          | 0.37124 | 0.26          | 0.45127 | 0.97          | 0.05149 |
| STM0526         | ylbA    | putative glyoxylate utilization protein                    | -0.07         | 0.90565 | 0.52          | 0.25879 | 0.70          | 0.23461 |
| STM0526         | ylbA    | putative glyoxylate utilization protein                    | 0.40          | 0.49677 | 0.05          | 0.93285 | 1.31          | 0.05415 |
| STM0527         | allC    | N-carbamoyl-L-amino acid amidohydrolase                    | -0.73         | 0.32788 | 0.64          | 0.07208 | 0.07          | 0.90141 |
| STM0527         | allC    | N-carbamoyl-L-amino acid amidohydrolase                    | -0.15         | 0.83365 | -0.50         | 0.27371 | -0.48         | 0.51990 |
| STM0528         | allD    | ureidoglycolate dehydrogenase                              | -0.64         | 0.40835 | 1.17          | 0.43951 | -1.52         | 0.03319 |
| STM0528         | allD    | ureidoglycolate dehydrogenase                              | -0.05         | 0.95219 | -1.22         | 0.06472 | -3.05         | 0.01922 |
| STM0529         | fdrA    | succinyl-CoA synthetase alpha subunit                      | 0.00          | 0.99384 | -0.45         | 0.40379 | -1.56         | 0.00483 |
| STM0529         | fdrA    | succinyl-CoA synthetase alpha subunit                      | 0.20          | 0.75398 | -0.74         | 0.13601 | -0.39         | 0.39919 |
| STM0530         | yibE    | putative cytoplasmic protein                               | -0.10         | 0.91393 | 0.29          | 0.35918 | -0.17         | 0.85436 |
| STM0530         | yibE    | putative cytoplasmic protein                               | 1.25          | 0.08396 | -1.03         | 0.02481 | -0.24         | 0.74614 |
| STM0531         | yibF    | putative cytoplasmic protein                               | 0.95          | 0.06025 | -0.24         | 0.61580 | -0.29         | 0.45763 |
| STM0531         | yibF    | putative cytoplasmic protein                               | 0.57          | 0.52175 | -1.90         | 0.00108 | -0.23         | 0.71846 |
| STM0532         | arcC    | carbamate kinase                                           | -0.25         | 0.73570 | -0.25         | 0.46255 | -1.04         | 0.12583 |
| STM0532         | arcC    | carbamate kinase                                           | 0.33          | 0.54912 | -0.15         | 0.60706 | -0.59         | 0.18003 |
| STM0533         | purK    | phosphoribosylaminoimidazole carboxylase                   | 0.70          | 0.17147 | 0.97          | 0.02133 | -0.98         | 0.03042 |
| STM0533         | purK    | phosphoribosylaminoimidazole carboxylase                   | 1.13          | 0.03453 | 0.78          | 0.05866 | 0.26          | 0.50557 |
| STM0534         | purE    | phosphoribosylaminoimidazole carboxylase catalytic subunit | -0.24         | 0.62990 | 1.15          | 0.01622 | -2.55         | 0.00061 |
| STM0534         | purE    | phosphoribosylaminoimidazole carboxylase catalytic subunit | -0.19         | 0.67020 | 1.16          | 0.01465 | -1.81         | 0.03452 |
| STM0535         | lpxH    | UDP-2,3-diacetylglucosamine hydrolase                      | -1.33         | 0.05948 | -0.95         | 0.00725 | -1.93         | 0.00801 |
| STM0535         | lpxH    | UDP-2,3-diacetylglucosamine hydrolase                      | -0.49         | 0.36946 | -1.43         | 0.00190 | -2.11         | 0.00920 |
| STM0536         | ppiB    | peptidyl-prolyl cis-trans isomerase B                      | -2.56         | 0.02357 | -0.95         | 0.01911 | -1.62         | 0.00487 |
| STM0536         | ppiB    | peptidyl-prolyl cis-trans isomerase B                      | -0.56         | 0.25111 | -0.28         | 0.37825 | -1.23         | 0.00704 |
| STM0537         | cysS    | cysteinyI-tRNA synthetase                                  | -0.41         | 0.40887 | -0.58         | 0.13350 | -0.93         | 0.03299 |
| STM0537         | cysS    | cysteinyI-tRNA synthetase                                  | -0.50         | 0.30358 | -0.22         | 0.62437 | -0.72         | 0.07980 |
| STM0538         | STM0538 | putative outer membrane protein                            | -1.30         | 0.02934 | -1.85         | 0.00376 | -2.01         | 0.01362 |
| STM0538         | STM0538 | putative outer membrane protein                            | 0.15          | 0.79511 | -1.90         | 0.00234 | -1.79         | 0.01435 |
| STM0539         | STM0539 | putative inner membrane protein                            | 0.25          | 0.70217 | 0.07          | 0.87327 | -0.48         | 0.40593 |
| STM0539         | STM0539 | putative inner membrane protein                            | 0.18          | 0.86644 | -1.20         | 0.00678 | -0.79         | 0.51545 |
| STM0540         | ybcI    | putative membrane-bound metal-dependent hydrolase          | -0.74         | 0.13488 | -1.51         | 0.02564 | -1.04         | 0.13575 |
| STM0540         | ybcI    | putative membrane-bound metal-dependent hydrolase          | -0.64         | 0.47141 | -0.64         | 0.10872 | 0.00          | 0.99937 |
| STM0541         | ybcJ    | putative cytoplasmic protein                               | -0.03         | 0.97248 | 0.13          | 0.67873 | -0.96         | 0.06932 |
| STM0541         | ybcJ    | putative cytoplasmic protein                               | 0.75          | 0.37638 | 0.17          | 0.56566 | 0.04          | 0.95072 |
| STM0542         | folD    | 5,10-methylene-tetrahydrofolate                            | -1.15         | 0.05275 | -0.57         | 0.06573 | -1.32         | 0.04845 |
| STM0542         | folD    | 5,10-methylene-tetrahydrofolate                            | -1.67         | 0.05440 | -0.55         | 0.07746 | -2.54         | 0.03530 |
| STM0543         | fimA    | fimbrin                                                    | 2.19          | 0.14571 | 1.32          | 0.01752 | -0.50         | 0.23491 |
| STM0543         | fimA    | fimbrin                                                    | 1.48          | 0.25983 | 0.76          | 0.03438 | -0.12         | 0.86540 |
| STM0544         | fimI    | fimbrial protein                                           | -0.13         | 0.74520 | -0.01         | 0.99286 | 0.70          | 0.06552 |
| STM0544         | fimI    | fimbrial protein                                           | 1.09          | 0.36007 | -0.37         | 0.22441 | 0.76          | 0.11386 |
| STM0545         | fimC    | periplasmic chaperone                                      | 0.33          | 0.54374 | 0.10          | 0.84409 | 0.00          | 0.99899 |
| STM0545         | fimC    | periplasmic chaperone                                      | -0.20         | 0.82751 | -1.36         | 0.00688 | -0.73         | 0.49698 |
| STM0546         | fimD    | outer membrane usher protein precursor                     | 0.13          | 0.76521 | 0.00          | 0.99835 | -0.58         | 0.34841 |
| STM0546         | fimD    | outer membrane usher protein precursor                     | 0.57          | 0.29352 | -1.40         | 0.02204 | -1.02         | 0.02633 |
| STM0547         | fimH    | minor fimbrial subunit                                     | -0.57         | 0.23646 | 0.08          | 0.88821 | -0.08         | 0.88786 |
| STM0547         | fimH    | minor fimbrial subunit                                     | 0.77          | 0.16053 | -0.69         | 0.08821 | -0.33         | 0.47927 |
| STM0548         | fimF    | putative fimbrial protein                                  | 2.93          | 0.06503 | 1.97          | 0.02643 | 6.37          | 0.00014 |
| STM0548         | fimF    | putative fimbrial protein                                  | 3.11          | 0.00747 | -1.37         | 0.00623 | 0.81          | 0.40058 |
| STM0549         | fimZ    | fimbrial protein Z                                         | 0.22          | 0.73174 | 0.48          | 0.21497 | -0.37         | 0.39919 |
| STM0549         | fimZ    | fimbrial protein Z                                         | -0.05         | 0.93638 | -0.16         | 0.75939 | -0.32         | 0.60849 |
| STM0550         | fimY    | putative regulatory protein                                | 1.91          | 0.15180 | 0.28          | 0.60675 | 2.90          | 0.09300 |
| STM0550         | fimY    | putative regulatory protein                                | 0.89          | 0.09192 | -0.94         | 0.07351 | 0.99          | 0.37862 |
| STM0551         | STM0551 | hypothetical protein STM0551                               | -0.53         | 0.41555 | -0.11         | 0.85557 | 1.02          | 0.49423 |
| STM0551         | STM0551 | hypothetical protein STM0551                               | 0.58          | 0.74962 | -1.12         | 0.02116 | 0.26          | 0.71679 |

**Table S2.** Genome-wide expression of *Salmonella enterica* serovar Typhimurium inside fibroblasts

Intracellular WT 24 h p.i.      Intracellular *phoP* 24 h p.i.      Extracellular WT stationary phase

Relative to WT exponential LB      Relative to *phoP* exponential LB      Relative to WT exponential LB



| Systematic name | Gene    | Product                                               | log2Ratio (M) | p value | log2Ratio (M) | p value | log2Ratio (M) | p value |
|-----------------|---------|-------------------------------------------------------|---------------|---------|---------------|---------|---------------|---------|
| STM0552         | fimW    | putative fimbrial protein                             | 0.35          | 0.62872 | 0.09          | 0.90038 | -0.30         | 0.69836 |
| STM0552         | fimW    | putative fimbrial protein                             | 2.16          | 0.01549 | -0.04         | 0.92004 | 1.13          | 0.03798 |
| STM0553         | argU    | STM0553                                               | -2.96         | 0.00705 | -1.38         | 0.00651 | -1.63         | 0.00725 |
| STM0553         | argU    | STM0553                                               | -0.78         | 0.36425 | -1.36         | 0.00325 | -0.62         | 0.35595 |
| STM05559.T1     | -       | STM05559.T1                                           | -1.90         | 0.01355 | -1.75         | 0.00095 | -2.12         | 0.00708 |
| STM05559.T1     | -       | STM05559.T1                                           | -0.42         | 0.52824 | -1.60         | 0.01560 | -1.51         | 0.00897 |
| STM0557         | STM0557 | putative inner membrane protein                       | 1.06          | 0.12960 | 0.68          | 0.04608 | 0.01          | 0.99014 |
| STM0557         | STM0557 | putative inner membrane protein                       | 1.71          | 0.01741 | 0.09          | 0.84235 | 1.76          | 0.00598 |
| STM0558         | yfdH    | putative glycosyltransferase                          | -0.76         | 0.36222 | -0.79         | 0.09265 | -0.88         | 0.23980 |
| STM0558         | yfdH    | putative glycosyltransferase                          | -0.33         | 0.54152 | -0.80         | 0.38382 | -0.74         | 0.31788 |
| STM0559         | rflb    | putative glycosyl translocase                         | -1.79         | 0.01707 | -0.51         | 0.34347 | -0.42         | 0.63786 |
| STM0559         | rflb    | putative glycosyl translocase                         | -0.45         | 0.57560 | -1.51         | 0.00579 | -0.58         | 0.31532 |
| STM0561         | STM0561 | sensor kinase                                         | 6.16          | 0.01215 | 0.26          | 0.41874 | 1.67          | 0.33113 |
| STM0561         | STM0561 | sensor kinase                                         | 7.72          | 0.00190 | 0.28          | 0.63116 | 4.47          | 0.03898 |
| STM0563         | STM0563 | putative transcriptional regulator                    | 0.31          | 0.51363 | 0.62          | 0.15334 | -0.49         | 0.35891 |
| STM0563         | STM0563 | putative transcriptional regulator                    | 2.50          | 0.16181 | 0.22          | 0.44171 | -0.72         | 0.39910 |
| STM0564         | STM0564 | pyridine nucleotide-disulfide oxidoreductase          | -0.25         | 0.62257 | 0.81          | 0.06768 | 0.45          | 0.21619 |
| STM0564         | STM0564 | pyridine nucleotide-disulfide oxidoreductase          | 0.36          | 0.41919 | -0.01         | 0.98628 | 0.98          | 0.24330 |
| STM0565         | STM0565 | putative periplasmic protein                          | -0.14         | 0.82541 | 0.32          | 0.41542 | 0.17          | 0.77857 |
| STM0565         | STM0565 | putative periplasmic protein                          | 0.50          | 0.49387 | -0.61         | 0.30560 | 1.06          | 0.05618 |
| STM0566         | STM0566 | putative inner membrane protein                       | -0.33         | 0.58428 | -1.10         | 0.03955 | -1.78         | 0.01984 |
| STM0566         | STM0566 | putative inner membrane protein                       | 0.10          | 0.85201 | -0.73         | 0.04175 | -1.37         | 0.03581 |
| STM0567         | STM0567 | putative DNA repair ATPase                            | 0.31          | 0.78079 | -0.94         | 0.02957 | -1.14         | 0.08589 |
| STM0567         | STM0567 | putative DNA repair ATPase                            | 0.95          | 0.13084 | 0.04          | 0.89655 | -0.20         | 0.70174 |
| STM0568         | pheP    | phenylalanine transporter                             | -1.10         | 0.06139 | -0.60         | 0.17307 | -0.60         | 0.18599 |
| STM0568         | pheP    | phenylalanine transporter                             | -0.76         | 0.15670 | -0.66         | 0.25140 | -1.15         | 0.14242 |
| STM0569         | ybdG    | hypothetical protein STM0569                          | -2.15         | 0.01569 | -1.23         | 0.00454 | -2.35         | 0.04678 |
| STM0569         | ybdG    | hypothetical protein STM0569                          | -0.81         | 0.20982 | -0.67         | 0.03954 | -0.68         | 0.22267 |
| STM0570         | apeE    | outer membrane esterase                               | 0.64          | 0.13961 | 1.58          | 0.00082 | 0.26          | 0.59065 |
| STM0570         | apeE    | outer membrane esterase                               | 1.08          | 0.04751 | 1.93          | 0.00033 | -0.01         | 0.98652 |
| STM0571         | STM0571 | putative inner membrane protein                       | -1.43         | 0.07035 | 0.37          | 0.30338 | -0.60         | 0.21752 |
| STM0571         | STM0571 | putative inner membrane protein                       | -1.51         | 0.03778 | -0.68         | 0.06177 | 0.14          | 0.83143 |
| STM0572         | STM0572 | putative phosphosugar isomerase                       | 0.20          | 0.81835 | -0.52         | 0.28782 | 0.72          | 0.27952 |
| STM0572         | STM0572 | putative phosphosugar isomerase                       | 0.34          | 0.77318 | -1.11         | 0.03087 | 0.23          | 0.81360 |
| STM0573         | STM0573 | putative inner membrane protein                       | 0.51          | 0.39064 | -0.47         | 0.57372 | 0.16          | 0.87445 |
| STM0573         | STM0573 | putative inner membrane protein                       | 1.10          | 0.06366 | -2.49         | 0.00060 | -0.87         | 0.13162 |
| STM0574         | STM0574 | putative PTS system mannose-specific enzyme IID       | 2.42          | 0.20471 | -0.22         | 0.57766 | 0.32          | 0.46715 |
| STM0574         | STM0574 | putative PTS system mannose-specific enzyme IID       | 0.85          | 0.16675 | -0.24         | 0.53636 | 1.03          | 0.04298 |
| STM0575         | STM0575 | putative inner membrane protein                       | -0.29         | 0.58682 | -0.22         | 0.65154 | 1.16          | 0.07709 |
| STM0575         | STM0575 | putative inner membrane protein                       | 1.00          | 0.07536 | -0.62         | 0.26241 | 0.69          | 0.09521 |
| STM0576         | STM0576 | putative PTS system mannose-specific enzyme IIAB      | -1.20         | 0.18659 | -0.93         | 0.05070 | -0.04         | 0.97461 |
| STM0576         | STM0576 | putative PTS system mannose-specific enzyme IIAB      | -0.12         | 0.82672 | -1.32         | 0.04367 | 0.77          | 0.59002 |
| STM0577         | STM0577 | putative PTS system mannose-specific enzyme IIAB      | 1.98          | 0.02179 | 1.22          | 0.02195 | 1.79          | 0.05886 |
| STM0577         | STM0577 | putative PTS system mannose-specific enzyme IIAB      | 2.91          | 0.03954 | 0.84          | 0.37999 | 2.53          | 0.00502 |
| STM0578         | nfnB    | dihydropteridine reductase/oxygen-insensitive NAD(P)H | -1.84         | 0.01162 | -0.50         | 0.13241 | -1.96         | 0.00440 |
| STM0578         | nfnB    | dihydropteridine reductase/oxygen-insensitive NAD(P)H | -0.94         | 0.17294 | -0.68         | 0.04577 | -0.60         | 0.25847 |
| STM0579         | ybdF    | putative cytoplasmic protein                          | 1.46          | 0.42407 | -0.03         | 0.97003 | -0.18         | 0.78357 |
| STM0579         | ybdF    | putative cytoplasmic protein                          | -0.43         | 0.31823 | -0.59         | 0.13171 | -0.39         | 0.34604 |
| STM0580         | STM0580 | putative regulatory protein                           | -1.36         | 0.03126 | -0.74         | 0.10176 | -1.82         | 0.03921 |
| STM0580         | STM0580 | putative regulatory protein                           | -0.37         | 0.46968 | -0.86         | 0.04534 | -1.39         | 0.00903 |
| STM0581         | STM0581 | putative regulatory protein                           | 2.06          | 0.01170 | 2.33          | 0.00023 | 0.97          | 0.02036 |
| STM0581         | STM0581 | putative regulatory protein                           | 2.09          | 0.01397 | 1.75          | 0.00184 | 2.10          | 0.00152 |
| STM0582         | ybdJ    | putative inner membrane protein                       | -0.31         | 0.64876 | 0.84          | 0.03035 | 0.20          | 0.72385 |
| STM0582         | ybdJ    | putative inner membrane protein                       | 0.18          | 0.76557 | 0.71          | 0.04696 | 0.21          | 0.58718 |
| STM0583         | ybdK    | putative cytoplasmic protein                          | 0.32          | 0.50687 | 0.37          | 0.24294 | 0.90          | 0.05748 |
| STM0583         | ybdK    | putative cytoplasmic protein                          | 0.78          | 0.16883 | 0.54          | 0.19337 | 1.79          | 0.00657 |
| STM0584         | entD    | enterochelin synthetase component D                   | -0.26         | 0.71993 | -0.26         | 0.77157 | 0.96          | 0.17062 |
| STM0584         | entD    | enterochelin synthetase component D                   | -1.18         | 0.21673 | -1.01         | 0.39282 | -1.64         | 0.00892 |
| STM0585         | fepA    | outer membrane ferric enterobactin receptor precursor | 0.18          | 0.72379 | 2.68          | 0.00008 | -0.07         | 0.90972 |
| STM0585         | fepA    | outer membrane ferric enterobactin receptor precursor | 1.02          | 0.08071 | 2.47          | 0.00033 | 0.69          | 0.23057 |
| STM0586         | fes     | enterochelin esterase                                 | -0.20         | 0.65452 | 1.73          | 0.00277 | -0.16         | 0.73110 |
| STM0586         | fes     | enterochelin esterase                                 | 0.55          | 0.31819 | 1.92          | 0.00049 | -1.27         | 0.01159 |
| STM0587         | ybdZ    | putative cytoplasmic protein                          | 0.55          | 0.18694 | 2.71          | 0.00033 | -1.89         | 0.00071 |
| STM0587         | ybdZ    | putative cytoplasmic protein                          | 0.71          | 0.13171 | 2.74          | 0.00014 | -0.62         | 0.31131 |
| STM0588         | entF    | enterobactin synthetase component F                   | -1.87         | 0.02407 | 1.67          | 0.00167 | -1.49         | 0.00820 |
| STM0588         | entF    | enterobactin synthetase component F                   | -0.14         | 0.74302 | 1.55          | 0.00353 | -0.75         | 0.18102 |
| STM0589         | fepE    | ferric enterobactin/enterochelin transporter          | -0.80         | 0.20900 | -0.66         | 0.10203 | -1.13         | 0.03972 |
| STM0589         | fepE    | ferric enterobactin/enterochelin transporter          | 2.34          | 0.13171 | 0.09          | 0.76763 | -0.33         | 0.53248 |
| STM0590         | fepC    | enterobactin transporter                              | -1.03         | 0.07951 | -0.25         | 0.66242 | -1.22         | 0.01267 |
| STM0590         | fepC    | enterobactin transporter                              | -0.68         | 0.13223 | -0.58         | 0.08212 | -0.07         | 0.88009 |

**Table S2.** Genome-wide expression of *Salmonella enterica* serovar Typhimurium inside fibroblasts

Intracellular WT 24 h p.i.      Intracellular *phoP* 24 h p.i.      Extracellular WT stationary phase

Relative to WT exponential LB      Relative to *phoP* exponential LB      Relative to WT exponential LB



| Systematic name | Gene    | Product                                                      | log2Ratio (M) | p value | log2Ratio (M) | p value | log2Ratio (M) | p value |
|-----------------|---------|--------------------------------------------------------------|---------------|---------|---------------|---------|---------------|---------|
| STM0591         | fepG    | ferric enterobactin transporter                              | -1.52         | 0.01961 | -1.34         | 0.00636 | -2.28         | 0.00072 |
| STM0591         | fepG    | ferric enterobactin transporter                              | -1.34         | 0.03088 | -1.26         | 0.00630 | -1.85         | 0.00193 |
| STM0592         | fepD    | ferric enterobactin/enterochelin transporter                 | -0.80         | 0.33525 | -1.11         | 0.01733 | -0.71         | 0.20933 |
| STM0592         | fepD    | ferric enterobactin/enterochelin transporter                 | 0.02          | 0.96779 | -1.60         | 0.00070 | 0.05          | 0.97275 |
| STM0593         | entS    | putative transport protein                                   | 0.05          | 0.94133 | -0.03         | 0.95207 | -0.56         | 0.24989 |
| STM0593         | entS    | putative transport protein                                   | 1.18          | 0.37789 | -0.06         | 0.91422 | 0.79          | 0.27996 |
| STM0594         | fepB    | ferric enterobactin transporter                              | -1.33         | 0.02633 | -0.11         | 0.71564 | -0.56         | 0.25552 |
| STM0594         | fepB    | ferric enterobactin transporter                              | -1.46         | 0.17236 | -0.22         | 0.59598 | -1.15         | 0.03483 |
| STM0595         | entC    | isochorismate synthase                                       | -1.94         | 0.02369 | -0.20         | 0.53218 | -0.98         | 0.08398 |
| STM0595         | entC    | isochorismate synthase                                       | -1.02         | 0.04447 | 0.33          | 0.29105 | -2.07         | 0.00044 |
| STM0596         | entE    | 2,3-dihydroxybenzoate-AMP ligase                             | -1.25         | 0.07277 | 0.97          | 0.01267 | -1.28         | 0.01548 |
| STM0596         | entE    | 2,3-dihydroxybenzoate-AMP ligase                             | -0.30         | 0.61551 | 0.81          | 0.04306 | -1.40         | 0.02102 |
| STM0597         | entB    | 2,3-dihydro-2,3-dihydroxybenzoate synthetase                 | -0.54         | 0.24490 | 1.41          | 0.00143 | 0.90          | 0.48950 |
| STM0597         | entB    | 2,3-dihydro-2,3-dihydroxybenzoate synthetase                 | 0.84          | 0.32861 | 1.31          | 0.00916 | 0.74          | 0.27715 |
| STM0598         | entA    | 2,3-dihydroxybenzoate-2,3-dehydrogenase                      | -1.66         | 0.01473 | 1.18          | 0.01578 | -1.89         | 0.00546 |
| STM0598         | entA    | 2,3-dihydroxybenzoate-2,3-dehydrogenase                      | 0.10          | 0.85422 | 1.50          | 0.00182 | -0.70         | 0.10540 |
| STM0599         | ybdB    | hypothetical protein STM0599                                 | -0.22         | 0.60606 | 1.23          | 0.00989 | -1.53         | 0.00511 |
| STM0599         | ybdB    | hypothetical protein STM0599                                 | 0.69          | 0.21674 | 0.97          | 0.00834 | -0.28         | 0.51510 |
| STM0600         | cstA    | carbon starvation protein                                    | 0.16          | 0.72041 | 1.68          | 0.00079 | 0.73          | 0.09049 |
| STM0600         | cstA    | carbon starvation protein                                    | 1.39          | 0.05136 | 1.52          | 0.00204 | 1.89          | 0.00151 |
| STM0601         | ybdD    | putative cytoplasmic protein                                 | -0.52         | 0.39217 | 0.20          | 0.58397 | 1.01          | 0.05921 |
| STM0601         | ybdD    | putative cytoplasmic protein                                 | 0.44          | 0.35237 | 1.35          | 0.00382 | 1.36          | 0.00742 |
| STM0602         | ybdH    | putative glycerol dehydrogenase                              | 0.56          | 0.20388 | 0.54          | 0.10127 | 0.18          | 0.63287 |
| STM0602         | ybdH    | putative glycerol dehydrogenase                              | -0.42         | 0.60031 | 0.59          | 0.11275 | 0.81          | 0.07059 |
| STM0603         | ybdL    | putative aminotransferase                                    | -1.37         | 0.03584 | -0.19         | 0.60615 | -1.11         | 0.01841 |
| STM0603         | ybdL    | putative aminotransferase                                    | -0.27         | 0.54542 | -0.09         | 0.76711 | -0.85         | 0.03130 |
| STM0604         | ybdM    | putative transcriptional regulator                           | 0.22          | 0.64076 | 0.85          | 0.04280 | -0.72         | 0.08252 |
| STM0604         | ybdM    | putative transcriptional regulator                           | 0.69          | 0.13900 | 0.64          | 0.12375 | 0.51          | 0.30118 |
| STM0605         | ybdN    | putative 3'-phosphoadenosine 5'-phosphosulfate               | 0.46          | 0.39131 | 0.70          | 0.04446 | 0.67          | 0.17308 |
| STM0605         | ybdN    | putative 3'-phosphoadenosine 5'-phosphosulfate               | 1.42          | 0.08198 | -0.20         | 0.75158 | 1.42          | 0.00510 |
| STM0606         | ybdO    | putative transcriptional regulator                           | -0.71         | 0.14412 | 0.07          | 0.87339 | -1.02         | 0.06186 |
| STM0606         | ybdO    | putative transcriptional regulator                           | -0.52         | 0.65199 | 0.37          | 0.33283 | -0.01         | 0.98279 |
| STM0607         | dsbG    | periplasmic disulfide isomerase/thiol-disulphide oxidase     | -1.00         | 0.10008 | 1.29          | 0.00619 | 0.17          | 0.81268 |
| STM0607         | dsbG    | periplasmic disulfide isomerase/thiol-disulphide oxidase     | 0.69          | 0.26167 | 1.35          | 0.00936 | 1.15          | 0.06200 |
| STM0608         | ahpC    | alkyl hydroperoxide reductase C22 subunit                    | -1.08         | 0.08918 | -0.13         | 0.66630 | -1.18         | 0.01013 |
| STM0608         | ahpC    | alkyl hydroperoxide reductase C22 subunit                    | -0.52         | 0.34691 | -0.20         | 0.47759 | -0.96         | 0.03313 |
| STM0609         | ahpF    | alkyl hydroperoxide reductase F52a subunit                   | -0.84         | 0.10140 | -0.89         | 0.03879 | -2.82         | 0.00093 |
| STM0609         | ahpF    | alkyl hydroperoxide reductase F52a subunit                   | 0.48          | 0.34370 | -0.28         | 0.40554 | -1.62         | 0.00274 |
| STM0610         | STM0610 | putative anaerobic dehydrogenase component                   | -0.82         | 0.29091 | -1.80         | 0.00544 | -1.17         | 0.03988 |
| STM0610         | STM0610 | putative anaerobic dehydrogenase component                   | 1.11          | 0.25354 | -2.18         | 0.00814 | 1.49          | 0.25541 |
| STM0611         | STM0611 | putative oxidoreductase protein                              | 0.92          | 0.14047 | -0.84         | 0.01601 | -0.71         | 0.19893 |
| STM0611         | STM0611 | putative oxidoreductase protein                              | -0.45         | 0.48454 | -1.91         | 0.00215 | 0.90          | 0.15094 |
| STM0612         | STM0612 | putative hydrogenase protein                                 | -0.21         | 0.65942 | -0.86         | 0.02480 | -0.33         | 0.56076 |
| STM0612         | STM0612 | putative hydrogenase protein                                 | -0.35         | 0.61495 | 0.07          | 0.85600 | -0.70         | 0.32969 |
| STM0613         | STM0613 | putative hydrogenase protein                                 | -1.10         | 0.05758 | 0.05          | 0.88634 | 0.72          | 0.36755 |
| STM0613         | STM0613 | putative hydrogenase protein                                 | 0.36          | 0.79260 | 0.43          | 0.29864 | 1.12          | 0.09781 |
| STM0614         | ybdQ    | putative universal stress protein                            | 0.28          | 0.61184 | 0.97          | 0.00980 | 1.50          | 0.00537 |
| STM0614         | ybdQ    | putative universal stress protein                            | -1.39         | 0.52540 | 0.45          | 0.28378 | 2.18          | 0.00118 |
| STM0615         | ybdR    | putative dehydrogenase                                       | 0.32          | 0.48123 | -0.13         | 0.74099 | 1.11          | 0.01760 |
| STM0615         | ybdR    | putative dehydrogenase                                       | 1.72          | 0.02017 | -0.10         | 0.73821 | 1.99          | 0.00152 |
| STM0616         | rnk     | nucleoside diphosphate kinase regulator                      | -0.34         | 0.50056 | -0.10         | 0.73817 | 0.01          | 0.98713 |
| STM0616         | rnk     | nucleoside diphosphate kinase regulator                      | 0.62          | 0.26857 | -0.87         | 0.01853 | 0.12          | 0.79703 |
| STM0617         | rna     | RNase I                                                      | 0.23          | 0.62673 | 0.26          | 0.44901 | -0.60         | 0.17000 |
| STM0617         | rna     | RNase I                                                      | 0.67          | 0.15588 | 0.50          | 0.13723 | -0.32         | 0.44707 |
| STM0618         | citT    | citrate/succinate transport antiport protein                 | -0.43         | 0.34794 | 0.28          | 0.40449 | -0.03         | 0.95090 |
| STM0618         | citT    | citrate/succinate transport antiport protein                 | 0.83          | 0.14190 | -0.20         | 0.52701 | -0.64         | 0.10077 |
| STM0619         | citG    | triphosphoribosyl-dephospho-CoA synthase                     | -0.36         | 0.42371 | 0.30          | 0.68760 | -0.11         | 0.87248 |
| STM0619         | citG    | triphosphoribosyl-dephospho-CoA synthase                     | -0.69         | 0.49024 | 0.43          | 0.32584 | -1.10         | 0.36023 |
| STM0620         | citX    | 2'-(5'-triphosphoribosyl)-3'-dephospho-CoA:apo-citrate lyase | -0.47         | 0.47834 | 0.26          | 0.41497 | -0.92         | 0.16345 |
| STM0620         | citX    | 2'-(5'-triphosphoribosyl)-3'-dephospho-CoA:apo-citrate lyase | 1.01          | 0.08701 | 0.79          | 0.06579 | -0.08         | 0.87847 |
| STM0621         | citF    | citrate lyase alpha chain/citrate-ACP transferase            | 0.56          | 0.21468 | 1.42          | 0.00862 | -1.09         | 0.06640 |
| STM0621         | citF    | citrate lyase alpha chain/citrate-ACP transferase            | 1.75          | 0.11370 | 1.65          | 0.00419 | 0.10          | 0.90200 |
| STM0622         | citE    | citrate lyase beta chain                                     | 0.36          | 0.52290 | 2.28          | 0.00115 | 0.54          | 0.13623 |
| STM0622         | citE    | citrate lyase beta chain                                     | 0.37          | 0.60637 | 1.52          | 0.00407 | 0.06          | 0.92608 |
| STM0623         | citD    | citrate lyase acyl carrier protein gamma chain               | -0.85         | 0.22471 | 1.39          | 0.00997 | -0.12         | 0.84080 |
| STM0623         | citD    | citrate lyase acyl carrier protein gamma chain               | 0.04          | 0.93135 | 0.90          | 0.04952 | 0.83          | 0.30674 |
| STM0624         | citC    | citrate lyase synthetase                                     | -0.44         | 0.31176 | 1.23          | 0.01414 | -0.79         | 0.04917 |
| STM0624         | citC    | citrate lyase synthetase                                     | 1.38          | 0.03323 | 0.49          | 0.24285 | 0.74          | 0.49423 |
| STM0625         | dpiB    | sensory histidine kinase                                     | -0.29         | 0.47673 | 0.98          | 0.01367 | -0.14         | 0.71772 |
| STM0625         | dpiB    | sensory histidine kinase                                     | 2.34          | 0.02162 | 0.99          | 0.02657 | 2.21          | 0.00222 |

**Table S2.** Genome-wide expression of *Salmonella enterica* serovar Typhimurium inside fibroblasts

|                 |           |                                                       | Intracellular WT<br>24 h p.i.                                                      |         | Intracellular <i>phoP</i><br>24 h p.i.                                              |         | Extracellular WT<br>stationary phase                                                |         |
|-----------------|-----------|-------------------------------------------------------|------------------------------------------------------------------------------------|---------|-------------------------------------------------------------------------------------|---------|-------------------------------------------------------------------------------------|---------|
|                 |           |                                                       | Relative to WT<br>exponential LB                                                   |         | Relative to <i>phoP</i><br>exponential LB                                           |         | Relative to WT<br>exponential LB                                                    |         |
|                 |           |                                                       |  |         |  |         |  |         |
| Systematic name | Gene      | Product                                               | log2Ratio (M)                                                                      | p value | log2Ratio (M)                                                                       | p value | log2Ratio (M)                                                                       | p value |
| STM0626         | dpiA      | response regulator                                    | 0.77                                                                               | 0.23414 | 0.88                                                                                | 0.08142 | -0.40                                                                               | 0.51869 |
| STM0626         | dpiA      | response regulator                                    | 0.91                                                                               | 0.26685 | -0.89                                                                               | 0.02156 | -0.70                                                                               | 0.41261 |
| STM0627         | dcuC      | dicarboxylate transporter                             | -0.97                                                                              | 0.15840 | 0.27                                                                                | 0.62318 | -0.72                                                                               | 0.24382 |
| STM0627         | dcuC      | dicarboxylate transporter                             | -0.21                                                                              | 0.71319 | -0.06                                                                               | 0.91587 | 1.04                                                                                | 0.04164 |
| STM0628         | pagP      | PhoPQ-activated gene                                  | -1.47                                                                              | 0.11671 | -1.77                                                                               | 0.23041 | -0.76                                                                               | 0.07554 |
| STM0628         | pagP      | PhoPQ-activated gene                                  | -1.35                                                                              | 0.03618 | -0.46                                                                               | 0.36364 | -0.80                                                                               | 0.13642 |
| STM0629         | cspE      | cold shock protein E                                  | -3.07                                                                              | 0.01046 | 0.19                                                                                | 0.81691 | 1.40                                                                                | 0.01627 |
| STM0629         | cspE      | cold shock protein E                                  | -1.72                                                                              | 0.01589 | 0.45                                                                                | 0.41960 | 2.05                                                                                | 0.00087 |
| STM0630         | ccrB      | camphor resistance protein CrcB                       | -2.11                                                                              | 0.02481 | -1.02                                                                               | 0.02991 | -0.35                                                                               | 0.34414 |
| STM0630         | ccrB      | camphor resistance protein CrcB                       | -1.27                                                                              | 0.41844 | -0.63                                                                               | 0.07389 | -0.13                                                                               | 0.83030 |
| STM0631         | ybeM      | putative hydrolase                                    | -1.65                                                                              | 0.06312 | -0.08                                                                               | 0.78615 | -0.60                                                                               | 0.11071 |
| STM0631         | ybeM      | putative hydrolase                                    | -0.46                                                                              | 0.45618 | -0.35                                                                               | 0.33116 | 0.44                                                                                | 0.29326 |
| STM0632         | tatE      | twin arginine translocase protein A                   | 0.39                                                                               | 0.47283 | 0.07                                                                                | 0.83423 | 1.16                                                                                | 0.04008 |
| STM0632         | tatE      | twin arginine translocase protein A                   | 1.63                                                                               | 0.03088 | 0.82                                                                                | 0.02957 | 1.35                                                                                | 0.01056 |
| STM0633         | lipA      | lipoyl synthase                                       | -1.62                                                                              | 0.09639 | -1.14                                                                               | 0.00310 | -1.42                                                                               | 0.00415 |
| STM0633         | lipA      | lipoyl synthase                                       | -0.92                                                                              | 0.49059 | -1.21                                                                               | 0.00257 | 0.02                                                                                | 0.96664 |
| STM0634         | ybeF      | putative transcriptional regulator                    | -1.09                                                                              | 0.12464 | -0.59                                                                               | 0.06862 | -0.56                                                                               | 0.31503 |
| STM0634         | ybeF      | putative transcriptional regulator                    | -0.23                                                                              | 0.62263 | -0.82                                                                               | 0.04035 | 0.09                                                                                | 0.85831 |
| STM0635,S       | lipB      | lipoyltransferase                                     | -1.88                                                                              | 0.02102 | -0.57                                                                               | 0.05922 | -1.12                                                                               | 0.01790 |
| STM0635,S       | lipB      | lipoyltransferase                                     | -1.50                                                                              | 0.05644 | -0.95                                                                               | 0.01071 | -1.68                                                                               | 0.00360 |
| STM0636         | ybeD      | hypothetical protein STM0636                          | -1.61                                                                              | 0.01813 | 0.85                                                                                | 0.02387 | -1.48                                                                               | 0.01432 |
| STM0636         | ybeD      | hypothetical protein STM0636                          | -0.38                                                                              | 0.36340 | 0.94                                                                                | 0.01120 | -1.37                                                                               | 0.00365 |
| STM0637         | dacA      | D-alanyl-D-alanine carboxypeptidase                   | -2.87                                                                              | 0.00571 | -1.44                                                                               | 0.00190 | -2.19                                                                               | 0.00047 |
| STM0637         | dacA      | D-alanyl-D-alanine carboxypeptidase                   | -1.78                                                                              | 0.01848 | -1.73                                                                               | 0.00076 | -2.67                                                                               | 0.01419 |
| STM0638         | rlpA      | minor lipoprotein                                     | -1.91                                                                              | 0.04784 | -1.36                                                                               | 0.02099 | -2.86                                                                               | 0.00016 |
| STM0638         | rlpA      | minor lipoprotein                                     | -0.66                                                                              | 0.46953 | -1.10                                                                               | 0.01023 | -2.27                                                                               | 0.00288 |
| STM0639         | mrdB      | rod shape-determining membrane protein                | -1.03                                                                              | 0.06705 | -0.67                                                                               | 0.09596 | -1.99                                                                               | 0.00125 |
| STM0639         | mrdB      | rod shape-determining membrane protein                | -0.26                                                                              | 0.56027 | -0.89                                                                               | 0.02064 | -1.19                                                                               | 0.01110 |
| STM0640         | mrda      | cell elongation-specific transpeptidase               | 0.01                                                                               | 0.99053 | -1.30                                                                               | 0.00347 | -0.94                                                                               | 0.03291 |
| STM0640         | mrda      | cell elongation-specific transpeptidase               | 1.41                                                                               | 0.14061 | -1.51                                                                               | 0.00295 | -1.02                                                                               | 0.06418 |
| STM0641         | ybeA      | hypothetical protein STM0641                          | -2.56                                                                              | 0.03787 | -0.36                                                                               | 0.22393 | -3.17                                                                               | 0.00409 |
| STM0641         | ybeA      | hypothetical protein STM0641                          | -1.12                                                                              | 0.03498 | -0.92                                                                               | 0.03417 | -3.24                                                                               | 0.00117 |
| STM0642         | ybeB      | hypothetical protein STM0642                          | -1.99                                                                              | 0.02579 | -0.15                                                                               | 0.67904 | -2.47                                                                               | 0.00476 |
| STM0642         | ybeB      | hypothetical protein STM0642                          | -0.90                                                                              | 0.15567 | -0.26                                                                               | 0.44618 | -0.76                                                                               | 0.59002 |
| STM0643         | cobC      | alpha ribazole-5'-P phosphatase                       | -1.05                                                                              | 0.09741 | -1.18                                                                               | 0.00270 | -1.96                                                                               | 0.00202 |
| STM0643         | cobC      | alpha ribazole-5'-P phosphatase                       | 0.33                                                                               | 0.46618 | -0.44                                                                               | 0.12647 | -0.96                                                                               | 0.02681 |
| STM0644         | cobD      | threonine-phosphate decarboxylase                     | -0.86                                                                              | 0.13361 | -0.44                                                                               | 0.17277 | -0.28                                                                               | 0.65658 |
| STM0644         | cobD      | threonine-phosphate decarboxylase                     | -0.77                                                                              | 0.09664 | -1.23                                                                               | 0.00510 | -1.14                                                                               | 0.40645 |
| STM0645         | nadD      | nicotinic acid mononucleotide adenylyltransferase     | 0.40                                                                               | 0.70958 | -1.00                                                                               | 0.03579 | -1.32                                                                               | 0.02668 |
| STM0645         | nadD      | nicotinic acid mononucleotide adenylyltransferase     | 0.77                                                                               | 0.49312 | -0.47                                                                               | 0.11407 | -0.61                                                                               | 0.26915 |
| STM0646         | hoIA      | DNA polymerase III subunit delta                      | -1.06                                                                              | 0.04270 | -1.11                                                                               | 0.01247 | -1.53                                                                               | 0.03761 |
| STM0646         | hoIA      | DNA polymerase III subunit delta                      | -1.17                                                                              | 0.03732 | -1.12                                                                               | 0.00838 | -2.92                                                                               | 0.02755 |
| STM0647         | rlpB      | minor lipoprotein                                     | -2.56                                                                              | 0.01198 | -1.10                                                                               | 0.01395 | -2.24                                                                               | 0.00050 |
| STM0647         | rlpB      | minor lipoprotein                                     | -2.20                                                                              | 0.00814 | -0.89                                                                               | 0.02289 | -2.03                                                                               | 0.00084 |
| STM0648         | leuS      | leucyl-tRNA synthetase                                | -3.44                                                                              | 0.00537 | -0.69                                                                               | 0.04804 | -1.16                                                                               | 0.00869 |
| STM0648         | leuS      | leucyl-tRNA synthetase                                | -2.22                                                                              | 0.01426 | -0.57                                                                               | 0.06247 | -1.72                                                                               | 0.00200 |
| STM0649,S       | STM0649,S | putative hydrolase                                    | 0.96                                                                               | 0.15782 | -0.71                                                                               | 0.05022 | 1.29                                                                                | 0.08286 |
| STM0649,S       | STM0649,S | putative hydrolase                                    | 0.70                                                                               | 0.17462 | -1.42                                                                               | 0.00139 | 1.19                                                                                | 0.05468 |
| STM0650         | STM0650   | putative hydrolase                                    | 1.41                                                                               | 0.07300 | 1.07                                                                                | 0.15154 | 1.75                                                                                | 0.01624 |
| STM0650         | STM0650   | putative hydrolase                                    | 3.22                                                                               | 0.08960 | 2.17                                                                                | 0.09098 | 4.18                                                                                | 0.00010 |
| STM0651         | STM0651   | 2-keto-3-deoxygluconate permease                      | 1.49                                                                               | 0.08671 | -0.45                                                                               | 0.20631 | 0.68                                                                                | 0.46889 |
| STM0651         | STM0651   | 2-keto-3-deoxygluconate permease                      | 3.53                                                                               | 0.04090 | -0.48                                                                               | 0.50209 | 1.74                                                                                | 0.26963 |
| STM0652         | STM0652   | putative sigma-54 dependent transcriptional regulator | 1.17                                                                               | 0.09448 | -0.46                                                                               | 0.22633 | 0.56                                                                                | 0.47382 |
| STM0652         | STM0652   | putative sigma-54 dependent transcriptional regulator | 2.49                                                                               | 0.01055 | -0.51                                                                               | 0.20817 | 1.69                                                                                | 0.01069 |
| STM0653         | ybeL      | putative cytoplasmic protein                          | -0.11                                                                              | 0.88600 | 0.38                                                                                | 0.24629 | 3.34                                                                                | 0.00048 |
| STM0653         | ybeL      | putative cytoplasmic protein                          | 1.56                                                                               | 0.03083 | 1.77                                                                                | 0.03119 | 4.19                                                                                | 0.00007 |
| STM0654         | ybeQ      | tetratricopeptide repeat protein                      | 0.02                                                                               | 0.96450 | 1.40                                                                                | 0.00203 | 2.24                                                                                | 0.00250 |
| STM0654         | ybeQ      | tetratricopeptide repeat protein                      | 1.48                                                                               | 0.06702 | 0.99                                                                                | 0.02034 | 2.97                                                                                | 0.00080 |
| STM0655         | ybeR      | putative cytoplasmic protein                          | 1.06                                                                               | 0.21331 | -0.09                                                                               | 0.82574 | -0.70                                                                               | 0.18043 |
| STM0655         | ybeR      | putative cytoplasmic protein                          | 2.10                                                                               | 0.02043 | -0.12                                                                               | 0.76429 | 0.44                                                                                | 0.47230 |
| STM0656         | ybeS      | putative molecular chaperone                          | -0.18                                                                              | 0.73161 | 0.14                                                                                | 0.66126 | 0.16                                                                                | 0.68157 |
| STM0656         | ybeS      | putative molecular chaperone                          | 1.01                                                                               | 0.16050 | -0.62                                                                               | 0.24214 | 0.81                                                                                | 0.35007 |
| STM0657         | ybeU      | putative cytoplasmic protein                          | -0.64                                                                              | 0.24587 | -0.58                                                                               | 0.57212 | 0.87                                                                                | 0.16409 |
| STM0657         | ybeU      | putative cytoplasmic protein                          | -0.27                                                                              | 0.77607 | -0.09                                                                               | 0.88464 | -0.58                                                                               | 0.16686 |
| STM0657         | ybeU      | putative cytoplasmic protein                          | 0.53                                                                               | 0.74253 | -2.10                                                                               | 0.00169 | -0.58                                                                               | 0.68811 |
| STM0657         | ybeU      | putative cytoplasmic protein                          | 0.71                                                                               | 0.23679 | -0.98                                                                               | 0.15141 | -0.49                                                                               | 0.33875 |
| STM0658         | ybeV      | putative molecular chaperone                          | -0.72                                                                              | 0.49497 | -0.33                                                                               | 0.26806 | -0.86                                                                               | 0.13383 |
| STM0658         | ybeV      | putative molecular chaperone                          | 0.74                                                                               | 0.27643 | 1.24                                                                                | 0.34786 | 0.65                                                                                | 0.21328 |
| STM0659         | hscC      | putative heatshock protein                            | 1.47                                                                               | 0.02098 | -0.26                                                                               | 0.46426 | -0.14                                                                               | 0.81857 |
| STM0659         | hscC      | putative heatshock protein                            | 2.36                                                                               | 0.02443 | 0.01                                                                                | 0.98646 | -0.41                                                                               | 0.45322 |

**Table S2.** Genome-wide expression of *Salmonella enterica* serovar Typhimurium inside fibroblasts

|                 |         |                                                      | Intracellular WT<br>24 h p.i.                                                      |         | Intracellular <i>phoP</i><br>24 h p.i.                                              |         | Extracellular WT<br>stationary phase                                                |         |
|-----------------|---------|------------------------------------------------------|------------------------------------------------------------------------------------|---------|-------------------------------------------------------------------------------------|---------|-------------------------------------------------------------------------------------|---------|
|                 |         |                                                      | Relative to WT<br>exponential LB                                                   |         | Relative to <i>phoP</i><br>exponential LB                                           |         | Relative to WT<br>exponential LB                                                    |         |
|                 |         |                                                      |  |         |  |         |  |         |
| Systematic name | Gene    | Product                                              | log2Ratio (M)                                                                      | p value | log2Ratio (M)                                                                       | p value | log2Ratio (M)                                                                       | p value |
| STM0660         | STM0660 | putative cytoplasmic protein                         | -0.35                                                                              | 0.66670 | -0.80                                                                               | 0.23186 | 1.00                                                                                | 0.10913 |
| STM0660         | STM0660 | putative cytoplasmic protein                         | 0.22                                                                               | 0.71179 | -2.66                                                                               | 0.00020 | 0.42                                                                                | 0.68650 |
| STM0661         | ybeK    | putative purine nucleoside hydrolase                 | -0.49                                                                              | 0.36750 | -0.88                                                                               | 0.06258 | -0.21                                                                               | 0.68426 |
| STM0661         | ybeK    | putative purine nucleoside hydrolase                 | -0.77                                                                              | 0.67151 | -0.79                                                                               | 0.02354 | -0.15                                                                               | 0.85108 |
| STM0662         | gltL    | glutamate/aspartate transporter                      | 3.37                                                                               | 0.00547 | 1.42                                                                                | 0.08867 | 1.16                                                                                | 0.03331 |
| STM0662         | gltL    | glutamate/aspartate transporter                      | 3.41                                                                               | 0.00789 | 0.91                                                                                | 0.02172 | 1.81                                                                                | 0.00496 |
| STM0663         | gltK    | glutamate/aspartate transporter                      | 0.88                                                                               | 0.37753 | 1.17                                                                                | 0.00389 | 0.80                                                                                | 0.07641 |
| STM0663         | gltK    | glutamate/aspartate transporter                      | 0.72                                                                               | 0.13462 | 0.73                                                                                | 0.06531 | 1.73                                                                                | 0.00838 |
| STM0664         | gltJ    | glutamate/aspartate transporter                      | -2.14                                                                              | 0.18943 | 0.27                                                                                | 0.66754 | 0.92                                                                                | 0.33471 |
| STM0664         | gltJ    | glutamate/aspartate transporter                      | 1.15                                                                               | 0.18541 | -1.26                                                                               | 0.00954 | 1.58                                                                                | 0.05910 |
| STM0665         | gltI    | glutamate/aspartate transporter                      | 0.77                                                                               | 0.14412 | 4.91                                                                                | 0.00000 | 4.09                                                                                | 0.00005 |
| STM0665         | gltI    | glutamate/aspartate transporter                      | 0.84                                                                               | 0.07268 | 4.02                                                                                | 0.00039 | 4.95                                                                                | 0.00003 |
| STM0666         | Int     | apolipoprotein N-acyltransferase                     | -1.38                                                                              | 0.02500 | 0.69                                                                                | 0.06803 | 0.40                                                                                | 0.31480 |
| STM0666         | Int     | apolipoprotein N-acyltransferase                     | -0.20                                                                              | 0.65033 | 1.34                                                                                | 0.00226 | 0.81                                                                                | 0.05508 |
| STM0667         | ybeX    | putative transport protein                           | -0.75                                                                              | 0.13407 | 0.66                                                                                | 0.42712 | -1.50                                                                               | 0.00612 |
| STM0667         | ybeX    | putative transport protein                           | -0.42                                                                              | 0.32224 | -0.70                                                                               | 0.05258 | -0.58                                                                               | 0.22858 |
| STM0668         | ybeY    | hypothetical protein STM0668                         | -2.17                                                                              | 0.00950 | -0.65                                                                               | 0.04168 | -0.49                                                                               | 0.17172 |
| STM0668         | ybeY    | hypothetical protein STM0668                         | -1.60                                                                              | 0.01679 | 0.39                                                                                | 0.18150 | -0.74                                                                               | 0.05235 |
| STM0669         | phoL    | putative phosphate starvation-inducible protein      | -1.02                                                                              | 0.13540 | 0.00                                                                                | 0.99037 | -1.82                                                                               | 0.00129 |
| STM0669         | phoL    | putative phosphate starvation-inducible protein      | 0.00                                                                               | 0.99687 | -0.02                                                                               | 0.96545 | -1.32                                                                               | 0.00732 |
| STM0670         | miaB    | rRNA modification protein                            | -1.64                                                                              | 0.04739 | -1.65                                                                               | 0.00249 | -2.59                                                                               | 0.00147 |
| STM0670         | miaB    | rRNA modification protein                            | -0.93                                                                              | 0.08664 | -1.34                                                                               | 0.00278 | -1.82                                                                               | 0.00594 |
| STM0671         | ubiF    | 2-octaprenyl-3-methyl-6-methoxy-1,4-benzoquinol      | -1.20                                                                              | 0.03758 | -1.88                                                                               | 0.00180 | -0.54                                                                               | 0.24973 |
| STM0671         | ubiF    | 2-octaprenyl-3-methyl-6-methoxy-1,4-benzoquinol      | -1.63                                                                              | 0.04574 | -1.60                                                                               | 0.00164 | -0.81                                                                               | 0.11544 |
| STM0672         | STM0672 | putative inner membrane protein                      | -1.97                                                                              | 0.01034 | -1.87                                                                               | 0.00037 | -0.84                                                                               | 0.06134 |
| STM0672         | STM0672 | putative inner membrane protein                      | -1.90                                                                              | 0.01646 | -2.16                                                                               | 0.00054 | -0.91                                                                               | 0.04899 |
| STM0673         | glnX    | STM0673                                              | -1.14                                                                              | 0.06276 | -1.36                                                                               | 0.05912 | 2.81                                                                                | 0.00115 |
| STM0673         | glnX    | STM0673                                              | -0.04                                                                              | 0.93222 | -1.23                                                                               | 0.05816 | 2.96                                                                                | 0.00014 |
| STM0674         | glnV    | STM0674                                              | -1.14                                                                              | 0.07505 | -2.05                                                                               | 0.00210 | 2.45                                                                                | 0.00062 |
| STM0674         | glnV    | STM0674                                              | -1.02                                                                              | 0.13109 | -2.42                                                                               | 0.00099 | 2.77                                                                                | 0.00018 |
| STM0675         | metU    | STM0675                                              | -3.20                                                                              | 0.01946 | -1.86                                                                               | 0.00336 | 1.34                                                                                | 0.05510 |
| STM0675         | metU    | STM0675                                              | -1.80                                                                              | 0.01788 | -1.73                                                                               | 0.00161 | 2.01                                                                                | 0.00112 |
| STM0676         | glnW    | STM0676                                              | -1.45                                                                              | 0.04072 | -1.12                                                                               | 0.04059 | 2.65                                                                                | 0.00033 |
| STM0676         | glnW    | STM0676                                              | -1.58                                                                              | 0.03539 | -1.59                                                                               | 0.01448 | 2.42                                                                                | 0.00093 |
| STM0677         | glnU    | STM0677                                              | -2.19                                                                              | 0.01710 | -1.44                                                                               | 0.03275 | 1.65                                                                                | 0.00975 |
| STM0677         | glnU    | STM0677                                              | -1.66                                                                              | 0.02251 | -2.16                                                                               | 0.00214 | 1.61                                                                                | 0.00487 |
| STM0678         | leuW    | STM0678                                              | -4.65                                                                              | 0.00512 | -3.46                                                                               | 0.00002 | -2.50                                                                               | 0.00022 |
| STM0678         | leuW    | STM0678                                              | -4.33                                                                              | 0.00547 | -3.66                                                                               | 0.00002 | -2.89                                                                               | 0.00016 |
| STM0679         | metT    | STM0679                                              | -3.03                                                                              | 0.00991 | -1.86                                                                               | 0.00053 | 1.33                                                                                | 0.02127 |
| STM0679         | metT    | STM0679                                              | -2.24                                                                              | 0.00901 | -1.90                                                                               | 0.00184 | 1.54                                                                                | 0.00537 |
| STM0680         | asnB    | asparagine synthetase B                              | -0.47                                                                              | 0.26120 | -0.47                                                                               | 0.23744 | -1.00                                                                               | 0.02623 |
| STM0680         | asnB    | asparagine synthetase B                              | -0.47                                                                              | 0.64483 | -1.75                                                                               | 0.00074 | -2.44                                                                               | 0.02020 |
| STM0681         | nagD    | putative phosphatase                                 | -0.84                                                                              | 0.20762 | -0.01                                                                               | 0.98671 | -0.89                                                                               | 0.02944 |
| STM0681         | nagD    | putative phosphatase                                 | 0.74                                                                               | 0.26729 | -0.48                                                                               | 0.19966 | -0.68                                                                               | 0.16346 |
| STM0682         | nagC    | N-acetylglucosamine operon transcriptional repressor | -1.05                                                                              | 0.05760 | -0.84                                                                               | 0.01730 | -1.99                                                                               | 0.00473 |
| STM0682         | nagC    | N-acetylglucosamine operon transcriptional repressor | -1.08                                                                              | 0.27453 | -0.92                                                                               | 0.01604 | -0.52                                                                               | 0.25902 |
| STM0683         | nagA    | N-acetylglucosamine-6-phosphate deacetylase          | -1.10                                                                              | 0.03938 | -0.14                                                                               | 0.68826 | -0.80                                                                               | 0.06086 |
| STM0683         | nagA    | N-acetylglucosamine-6-phosphate deacetylase          | -0.09                                                                              | 0.92245 | 0.26                                                                                | 0.44499 | -0.36                                                                               | 0.34506 |
| STM0684         | nagB    | glucosamine-6-phosphate deaminase                    | -2.34                                                                              | 0.01385 | -0.06                                                                               | 0.86434 | 0.15                                                                                | 0.72626 |
| STM0684         | nagB    | glucosamine-6-phosphate deaminase                    | -1.79                                                                              | 0.01443 | -0.30                                                                               | 0.37149 | 1.16                                                                                | 0.01740 |
| STM0685         | nagE    | N-acetylglucosamine-specific enzyme IIABC            | -0.91                                                                              | 0.05926 | -0.37                                                                               | 0.72539 | -0.79                                                                               | 0.19777 |
| STM0685         | nagE    | N-acetylglucosamine-specific enzyme IIABC            | -1.27                                                                              | 0.19202 | -1.11                                                                               | 0.00432 | -0.95                                                                               | 0.21029 |
| STM0686         | glnS    | glutaminyl-tRNA synthetase                           | -0.58                                                                              | 0.42724 | -0.80                                                                               | 0.04936 | -1.27                                                                               | 0.04089 |
| STM0686         | glnS    | glutaminyl-tRNA synthetase                           | 0.50                                                                               | 0.37575 | -1.00                                                                               | 0.02250 | -0.52                                                                               | 0.36968 |
| STM0687         | ybfM    | putative outer membrane protein                      | 1.00                                                                               | 0.19322 | -0.11                                                                               | 0.78133 | -0.41                                                                               | 0.29300 |
| STM0687         | ybfM    | putative outer membrane protein                      | 1.71                                                                               | 0.03236 | 0.13                                                                                | 0.72635 | 0.74                                                                                | 0.20492 |
| STM0688         | ybfN    | putative lipoprotein                                 | 2.36                                                                               | 0.01041 | 0.67                                                                                | 0.13074 | 1.35                                                                                | 0.03659 |
| STM0688         | ybfN    | putative lipoprotein                                 | 2.05                                                                               | 0.05312 | -0.35                                                                               | 0.38408 | 0.62                                                                                | 0.19504 |
| STM0689         | citA    | citrate-proton symporter                             | -0.71                                                                              | 0.18541 | -0.60                                                                               | 0.26172 | -0.66                                                                               | 0.27527 |
| STM0689         | citA    | citrate-proton symporter                             | -0.20                                                                              | 0.78983 | -0.45                                                                               | 0.17115 | -0.76                                                                               | 0.13636 |
| STM0690         | citB    | citrate utilization protein b                        | 1.08                                                                               | 0.16800 | 0.52                                                                                | 0.21076 | 0.25                                                                                | 0.63480 |
| STM0690         | citB    | citrate utilization protein b                        | 2.18                                                                               | 0.02067 | -0.04                                                                               | 0.91666 | 0.69                                                                                | 0.31592 |
| STM0691         | STM0691 | hypothetical protein STM0691                         | 0.40                                                                               | 0.43737 | -0.20                                                                               | 0.57900 | 1.43                                                                                | 0.03073 |
| STM0691         | STM0691 | hypothetical protein STM0691                         | 1.17                                                                               | 0.09934 | -0.86                                                                               | 0.04417 | 0.63                                                                                | 0.15950 |
| STM0692         | STM0692 | putative transcriptional regulator                   | -0.33                                                                              | 0.45282 | -0.97                                                                               | 0.03406 | -2.03                                                                               | 0.00220 |
| STM0692         | STM0692 | putative transcriptional regulator                   | 0.32                                                                               | 0.55064 | -1.10                                                                               | 0.01701 | -0.57                                                                               | 0.26761 |
| STM0693         | fur     | ferric uptake regulator                              | -1.90                                                                              | 0.05343 | -1.28                                                                               | 0.00550 | -1.75                                                                               | 0.03031 |
| STM0693         | fur     | ferric uptake regulator                              | -0.97                                                                              | 0.15272 | -1.15                                                                               | 0.00556 | -1.70                                                                               | 0.00146 |
| STM0694         | fldA    | flavodoxin                                           | -3.42                                                                              | 0.00595 | -1.04                                                                               | 0.01336 | -2.82                                                                               | 0.00014 |
| STM0694         | fldA    | flavodoxin                                           | -1.12                                                                              | 0.06702 | -0.76                                                                               | 0.03250 | -1.62                                                                               | 0.00591 |

**Table S2.** Genome-wide expression of *Salmonella enterica* serovar Typhimurium inside fibroblasts

Intracellular WT 24 h p.i.      Intracellular *phoP* 24 h p.i.      Extracellular WT stationary phase

Relative to WT exponential LB      Relative to *phoP* exponential LB      Relative to WT exponential LB



| Systematic name | Gene       | Product                                           | log2Ratio (M) | p value | log2Ratio (M) | p value | log2Ratio (M) | p value |
|-----------------|------------|---------------------------------------------------|---------------|---------|---------------|---------|---------------|---------|
| STM0695         | ybfE       | putative SOS response protein                     | -2.56         | 0.00812 | -1.92         | 0.00070 | -2.47         | 0.00108 |
| STM0695         | ybfE       | putative SOS response protein                     | -2.25         | 0.06218 | -2.13         | 0.00014 | -3.98         | 0.00007 |
| STM0696         | ybfF       | putative enzyme                                   | -1.50         | 0.01835 | -1.61         | 0.00164 | -3.44         | 0.00027 |
| STM0696         | ybfF       | putative enzyme                                   | -1.37         | 0.02780 | -1.15         | 0.00596 | -1.97         | 0.00386 |
| STM0697         | seqA       | sequestration protein A                           | -3.16         | 0.01460 | -0.96         | 0.01456 | -2.29         | 0.00119 |
| STM0697         | seqA       | sequestration protein A                           | -1.32         | 0.02636 | -1.16         | 0.00549 | -1.68         | 0.00801 |
| STM0698         | pgm        | phosphoglucomutase                                | 0.45          | 0.50518 | -0.14         | 0.62234 | 1.52          | 0.00555 |
| STM0698         | pgm        | phosphoglucomutase                                | 0.88          | 0.54856 | -0.08         | 0.82951 | 2.29          | 0.00160 |
| STM0699         | STM0699    | putative cytoplasmic protein                      | -0.85         | 0.15487 | -1.75         | 0.00055 | -1.61         | 0.02160 |
| STM0699         | STM0699    | putative cytoplasmic protein                      | 0.68          | 0.21280 | -1.09         | 0.01689 | -0.93         | 0.08360 |
| STM0700         | potE       | putrescine/ornithine antiporter                   | 0.60          | 0.72265 | -0.53         | 0.10489 | -1.17         | 0.06716 |
| STM0700         | potE       | putrescine/ornithine antiporter                   | 3.32          | 0.01067 | 0.09          | 0.85269 | 2.43          | 0.00395 |
| STM0701         | speF       | ornithine decarboxylase isozyme                   | -0.52         | 0.35022 | -1.06         | 0.01544 | -0.03         | 0.95416 |
| STM0701         | speF       | ornithine decarboxylase isozyme                   | 1.49          | 0.04005 | -0.89         | 0.03645 | 0.91          | 0.07426 |
| STM0702         | kdpE       | response regulator                                | 1.66          | 0.02201 | -0.32         | 0.32054 | 0.00          | 0.99486 |
| STM0702         | kdpE       | response regulator                                | 2.91          | 0.00686 | -0.14         | 0.64912 | 0.57          | 0.25809 |
| STM0703         | kdpD       | sensor kinase                                     | -1.49         | 0.01590 | -0.39         | 0.60308 | -1.09         | 0.19448 |
| STM0703         | kdpD       | sensor kinase                                     | 1.32          | 0.36846 | -0.12         | 0.75579 | 0.19          | 0.83020 |
| STM0704         | kdpC       | potassium-transporting ATPase subunit C           | 0.65          | 0.41695 | 0.42          | 0.17843 | -1.14         | 0.11745 |
| STM0704         | kdpC       | potassium-transporting ATPase subunit C           | -0.05         | 0.95941 | -0.02         | 0.96249 | -0.80         | 0.17768 |
| STM0705         | kdpB       | potassium-transporting ATPase subunit B           | -0.85         | 0.32123 | 0.03          | 0.97838 | -1.32         | 0.00981 |
| STM0705         | kdpB       | potassium-transporting ATPase subunit B           | -0.48         | 0.48560 | -0.62         | 0.18663 | -1.08         | 0.08205 |
| STM0706         | kdpA       | potassium-transporting ATPase subunit A           | -0.34         | 0.67328 | -1.62         | 0.00688 | 0.32          | 0.79018 |
| STM0706         | kdpA       | potassium-transporting ATPase subunit A           | -0.35         | 0.53193 | -1.42         | 0.00139 | -0.91         | 0.44761 |
| STM0708         | ybfA       | putative periplasmic protein                      | 0.63          | 0.22157 | 1.76          | 0.00325 | 0.49          | 0.20494 |
| STM0708         | ybfA       | putative periplasmic protein                      | 1.78          | 0.02936 | 1.38          | 0.02972 | 1.14          | 0.01667 |
| STM0709         | phrB       | deoxyribodipyrimidine photolyase                  | -0.69         | 0.15040 | 0.33          | 0.46473 | -0.56         | 0.31837 |
| STM0709         | phrB       | deoxyribodipyrimidine photolyase                  | -0.25         | 0.84585 | 0.16          | 0.70841 | 0.13          | 0.71804 |
| STM0710         | ybgH       | putative POT family transport protein             | -0.73         | 0.14053 | 0.64          | 0.09245 | -0.66         | 0.41067 |
| STM0710         | ybgH       | putative POT family transport protein             | 0.50          | 0.51800 | 0.07          | 0.80321 | -0.07         | 0.86528 |
| STM0711         | ybgI       | putative cytoplasmic protein                      | -1.09         | 0.06636 | 0.46          | 0.14203 | -1.21         | 0.00957 |
| STM0711         | ybgI       | putative cytoplasmic protein                      | -0.36         | 0.55006 | 0.12          | 0.72335 | 0.16          | 0.66951 |
| STM0712         | ybgJ       | putative carboxylase                              | -1.52         | 0.02075 | 0.11          | 0.77317 | -1.94         | 0.00109 |
| STM0712         | ybgJ       | putative carboxylase                              | -0.63         | 0.18330 | 0.13          | 0.67941 | -1.10         | 0.03277 |
| STM0713         | ybgK       | putative carboxylase                              | -1.80         | 0.01479 | -0.85         | 0.14836 | -0.81         | 0.05729 |
| STM0713         | ybgK       | putative carboxylase                              | -0.99         | 0.05106 | -0.58         | 0.07972 | -1.25         | 0.00501 |
| STM0714         | ybgL       | hypothetical protein STM0714                      | -0.63         | 0.32776 | -0.26         | 0.72277 | -1.79         | 0.05254 |
| STM0714         | ybgL       | hypothetical protein STM0714                      | -1.20         | 0.27923 | -0.42         | 0.17513 | -1.35         | 0.10030 |
| STM0715         | STM0715    | putative cytoplasmic protein                      | 0.38          | 0.62471 | -0.05         | 0.95206 | 0.03          | 0.97258 |
| STM0715         | STM0715    | putative cytoplasmic protein                      | 1.22          | 0.07865 | -0.03         | 0.94131 | 0.32          | 0.65167 |
| STM0716         | NT_FimBE_C | putative phage integrase                          | -0.41         | 0.50674 | 0.52          | 0.09523 | -0.06         | 0.93289 |
| STM0716         | NT_FimBE_C | putative phage integrase                          | 1.73          | 0.01215 | 0.24          | 0.42544 | 1.29          | 0.01963 |
| STM0719         | STM0719    | putative UDP-galactopyranose mutase               | -0.10         | 0.86520 | -0.04         | 0.93704 | -0.86         | 0.12396 |
| STM0719         | STM0719    | putative UDP-galactopyranose mutase               | 0.55          | 0.49910 | 0.54          | 0.72511 | -0.08         | 0.91566 |
| STM0719         | STM0719    | putative UDP-galactopyranose mutase               | 0.77          | 0.14135 | 0.97          | 0.01604 | 0.94          | 0.05275 |
| STM0719         | STM0719    | putative UDP-galactopyranose mutase               | 2.10          | 0.01001 | -0.79         | 0.04306 | 0.56          | 0.13535 |
| STM0719         | STM0719    | putative UDP-galactopyranose mutase               | 2.60          | 0.02059 | -1.14         | 0.11142 | -0.51         | 0.63740 |
| STM0719         | STM0719    | putative UDP-galactopyranose mutase               | 0.46          | 0.58858 | -0.20         | 0.50625 | 0.96          | 0.15024 |
| STM0720         | STM0720    | putative glycosyl transferase                     | -0.86         | 0.08127 | -0.85         | 0.04600 | -0.03         | 0.94145 |
| STM0720         | STM0720    | putative glycosyl transferase                     | 0.09          | 0.91100 | -0.03         | 0.96876 | 0.74          | 0.33069 |
| STM0721         | STM0721    | putative glycosyl transferase                     | -0.06         | 0.90542 | 0.23          | 0.75781 | 0.66          | 0.30228 |
| STM0721         | STM0721    | putative glycosyl transferase                     | -0.11         | 0.88986 | -2.04         | 0.00289 | -2.42         | 0.02497 |
| STM0722         | STM0722    | putative ABC transporter permease protein         | -0.54         | 0.32546 | -0.09         | 0.86466 | 0.00          | 0.99701 |
| STM0722         | STM0722    | putative ABC transporter permease protein         | -0.11         | 0.85422 | -1.26         | 0.02111 | -0.12         | 0.82079 |
| STM0723         | STM0723    | putative ABC-type polysaccharide/polyol phosphate | -0.71         | 0.27249 | 0.29          | 0.36866 | -0.77         | 0.09346 |
| STM0723         | STM0723    | putative ABC-type polysaccharide/polyol phosphate | 0.52          | 0.30252 | -0.62         | 0.26531 | 0.73          | 0.14090 |
| STM0724         | STM0724    | putative glycosyltransferase                      | -0.72         | 0.33717 | -0.40         | 0.35162 | 0.38          | 0.44761 |
| STM0724         | STM0724    | putative glycosyltransferase                      | 0.59          | 0.32060 | -1.13         | 0.25279 | -0.54         | 0.59941 |
| STM0725         | STM0725    | putative glycosyltransferase                      | -0.94         | 0.34639 | -0.61         | 0.17391 | -0.42         | 0.33093 |
| STM0725         | STM0725    | putative glycosyltransferase                      | 1.25          | 0.09938 | -0.11         | 0.83068 | 1.23          | 0.13471 |
| STM0726         | STM0726    | putative glycosyl transferase                     | 1.39          | 0.02441 | 0.90          | 0.01561 | 1.50          | 0.01562 |
| STM0726         | STM0726    | putative glycosyl transferase                     | 2.61          | 0.01041 | 0.10          | 0.85978 | 3.04          | 0.00018 |
| STM0728         | nei        | endonuclease VIII                                 | -0.06         | 0.92487 | 0.31          | 0.29160 | -0.30         | 0.39974 |
| STM0728         | nei        | endonuclease VIII                                 | 0.09          | 0.82416 | -0.07         | 0.86108 | 0.67          | 0.27073 |
| STM0729         | abrB       | putative transport protein                        | -1.38         | 0.10067 | -1.01         | 0.05843 | -0.62         | 0.20262 |
| STM0729         | abrB       | putative transport protein                        | -0.64         | 0.37382 | -0.87         | 0.01619 | -1.14         | 0.06062 |
| STM0730         | gltA       | citrate synthase                                  | 1.99          | 0.55094 | 1.00          | 0.04577 | -0.44         | 0.23261 |
| STM0730         | gltA       | citrate synthase                                  | -1.37         | 0.09118 | 1.84          | 0.00623 | 0.13          | 0.77280 |
| STM0732         | sdhC       | succinate dehydrogenase cytochrome b556 large     | -2.86         | 0.01580 | -1.02         | 0.02651 | -0.82         | 0.06667 |
| STM0732         | sdhC       | succinate dehydrogenase cytochrome b556 large     | -2.28         | 0.00924 | -1.23         | 0.00321 | -1.47         | 0.00415 |

**Table S2.** Genome-wide expression of *Salmonella enterica* serovar Typhimurium inside fibroblasts

Intracellular WT 24 h p.i.      Intracellular *phoP* 24 h p.i.      Extracellular WT stationary phase

Relative to WT exponential LB      Relative to *phoP* exponential LB      Relative to WT exponential LB



| Systematic name | Gene      | Product                                              | log2Ratio (M) | p value | log2Ratio (M) | p value | log2Ratio (M) | p value |
|-----------------|-----------|------------------------------------------------------|---------------|---------|---------------|---------|---------------|---------|
| STM0733         | sdhD      | succinate dehydrogenase cytochrome b556 small        | -2.00         | 0.02762 | -2.02         | 0.00036 | -1.89         | 0.00157 |
| STM0733         | sdhD      | succinate dehydrogenase cytochrome b556 small        | -2.46         | 0.02948 | -1.52         | 0.00422 | -1.60         | 0.00694 |
| STM0734         | sdhA      | succinate dehydrogenase catalytic subunit            | -2.56         | 0.00753 | -1.92         | 0.05244 | -1.53         | 0.00903 |
| STM0734         | sdhA      | succinate dehydrogenase catalytic subunit            | -3.13         | 0.00577 | -2.92         | 0.00013 | -2.09         | 0.00068 |
| STM0735         | sdhB      | succinate dehydrogenase catalytic subunit            | -2.07         | 0.01263 | -1.86         | 0.00069 | -2.25         | 0.00070 |
| STM0735         | sdhB      | succinate dehydrogenase catalytic subunit            | -0.82         | 0.15516 | -1.38         | 0.00273 | -1.71         | 0.00467 |
| STM0736         | sucA      | 2-oxoglutarate dehydrogenase                         | -3.84         | 0.00565 | -1.74         | 0.00525 | -2.83         | 0.00496 |
| STM0736         | sucA      | 2-oxoglutarate dehydrogenase                         | -1.41         | 0.05957 | -1.59         | 0.01622 | -3.84         | 0.00277 |
| STM0737         | sucB      | dihydrolipoamide acetyltransferase                   | -3.85         | 0.01032 | -0.22         | 0.48519 | -2.69         | 0.00102 |
| STM0737         | sucB      | dihydrolipoamide acetyltransferase                   | -2.43         | 0.00824 | -0.12         | 0.75985 | -2.96         | 0.00019 |
| STM0738         | sucC      | succinyl-CoA synthetase subunit beta                 | -0.58         | 0.58701 | 0.83          | 0.03027 | -1.32         | 0.04466 |
| STM0738         | sucC      | succinyl-CoA synthetase subunit beta                 | -0.78         | 0.39473 | 1.00          | 0.01853 | -1.51         | 0.03381 |
| STM0739         | sucD      | succinyl-CoA synthetase alpha subunit                | -0.94         | 0.06974 | 0.79          | 0.06439 | -1.04         | 0.02689 |
| STM0739         | sucD      | succinyl-CoA synthetase alpha subunit                | 0.35          | 0.58334 | 0.32          | 0.40572 | -0.52         | 0.21359 |
| STM0740         | cydA      | cytochrome d terminal oxidase polypeptide subunit I  | -1.93         | 0.01520 | -0.86         | 0.02910 | -2.48         | 0.00074 |
| STM0740         | cydA      | cytochrome d terminal oxidase polypeptide subunit I  | -0.87         | 0.24054 | -0.84         | 0.04321 | -2.60         | 0.00108 |
| STM0741         | cydB      | cytochrome d terminal oxidase polypeptide subunit II | -1.93         | 0.01967 | 0.00          | 0.99632 | -1.79         | 0.00125 |
| STM0741         | cydB      | cytochrome d terminal oxidase polypeptide subunit II | -1.61         | 0.05901 | -0.59         | 0.08550 | -2.06         | 0.00072 |
| STM0742         | ybgT      | putative outer membrane lipoprotein                  | 0.45          | 0.83532 | -0.86         | 0.02378 | -1.56         | 0.37275 |
| STM0742         | ybgT      | putative outer membrane lipoprotein                  | 0.05          | 0.94496 | -0.39         | 0.24183 | -1.70         | 0.05156 |
| STM0743         | ybgE      | putative inner membrane lipoprotein                  | -1.65         | 0.01298 | -1.17         | 0.00546 | -2.44         | 0.00024 |
| STM0743         | ybgE      | putative inner membrane lipoprotein                  | -2.34         | 0.01228 | -1.15         | 0.01094 | -2.07         | 0.10919 |
| STM0744         | ybgC      | putative esterase                                    | -2.37         | 0.00796 | -1.09         | 0.01848 | -1.98         | 0.00174 |
| STM0744         | ybgC      | putative esterase                                    | -1.39         | 0.03086 | -1.04         | 0.00889 | -1.38         | 0.04617 |
| STM0745         | tolQ      | Tol import system inner membrane protein             | -0.72         | 0.61970 | -1.30         | 0.00241 | -2.52         | 0.00026 |
| STM0745         | tolQ      | Tol import system inner membrane protein             | 0.42          | 0.41697 | -1.66         | 0.00212 | -2.32         | 0.00036 |
| STM0746         | tolR      | Tol import system inner membrane protein             | -2.09         | 0.01417 | -1.08         | 0.01804 | -3.35         | 0.00009 |
| STM0746         | tolR      | Tol import system inner membrane protein             | -1.41         | 0.02695 | -0.69         | 0.03536 | -2.05         | 0.03137 |
| STM0747         | tolA      | cell envelope integrity inner membrane protein TolA  | -2.20         | 0.01028 | -0.54         | 0.07765 | -2.39         | 0.00075 |
| STM0747         | tolA      | cell envelope integrity inner membrane protein TolA  | -0.65         | 0.26216 | -0.53         | 0.08928 | -1.84         | 0.00133 |
| STM0748         | tolB      | translocation protein TolB precursor                 | -2.83         | 0.00630 | -0.28         | 0.35231 | -2.31         | 0.00035 |
| STM0748         | tolB      | translocation protein TolB precursor                 | -1.49         | 0.01813 | -0.26         | 0.49971 | -1.57         | 0.01078 |
| STM0749         | pal       | peptidoglycan-associated lipoprotein precursor       | -3.96         | 0.01114 | -1.13         | 0.00764 | -3.14         | 0.00012 |
| STM0749         | pal       | peptidoglycan-associated lipoprotein precursor       | -2.70         | 0.03569 | -1.24         | 0.00312 | -3.02         | 0.00017 |
| STM0750         | ybgF      | putative periplasmic protein                         | -1.20         | 0.03054 | -0.35         | 0.34076 | -2.03         | 0.00094 |
| STM0750         | ybgF      | putative periplasmic protein                         | -0.99         | 0.04688 | -0.10         | 0.74063 | -1.23         | 0.02240 |
| STM0751         | lysT      | STM0751                                              | -1.40         | 0.13314 | -1.14         | 0.00365 | 0.17          | 0.72924 |
| STM0751         | lysT      | STM0751                                              | -0.03         | 0.94878 | -1.01         | 0.00958 | 0.15          | 0.70823 |
| STM0752         | valT      | STM0752                                              | -1.21         | 0.23088 | -1.25         | 0.00251 | -1.16         | 0.04265 |
| STM0752         | valT      | STM0752                                              | -0.86         | 0.33859 | -1.29         | 0.00295 | -0.95         | 0.04567 |
| STM0753         | lysW      | STM0753                                              | -2.29         | 0.01032 | -1.19         | 0.00681 | 0.33          | 0.46715 |
| STM0753         | lysW      | STM0753                                              | -1.01         | 0.40767 | -1.27         | 0.00387 | 0.26          | 0.54700 |
| STM0754         | lysY      | STM0754                                              | -2.17         | 0.04984 | -1.49         | 0.00185 | -0.56         | 0.19527 |
| STM0754         | lysY      | STM0754                                              | -1.00         | 0.35870 | -1.33         | 0.00165 | -0.03         | 0.94081 |
| STM0755         | lysZ      | STM0755                                              | -2.01         | 0.08764 | -0.81         | 0.02815 | 0.09          | 0.85588 |
| STM0755         | lysZ      | STM0755                                              | -1.00         | 0.31834 | -0.56         | 0.08203 | 0.41          | 0.31813 |
| STM0756         | nadA      | quinolinate synthetase                               | -0.81         | 0.12327 | -0.21         | 0.55702 | 0.50          | 0.26028 |
| STM0756         | nadA      | quinolinate synthetase                               | 0.01          | 0.97962 | -0.08         | 0.85235 | 0.73          | 0.09216 |
| STM0757         | pnuC      | nucleoside/purine/pyrimidine transporter             | -0.94         | 0.19282 | 0.68          | 0.06361 | 0.95          | 0.03662 |
| STM0757         | pnuC      | nucleoside/purine/pyrimidine transporter             | -0.34         | 0.48245 | -0.29         | 0.41102 | 0.62          | 0.12853 |
| STM0758         | ybgR      | zinc transporter ZitB                                | -0.94         | 0.07746 | -0.11         | 0.71949 | 0.84          | 0.03772 |
| STM0758         | ybgR      | zinc transporter ZitB                                | -1.54         | 0.09878 | 0.09          | 0.83521 | 0.91          | 0.09524 |
| STM0759         | ybgS      | hypothetical protein STM0759                         | 2.77          | 0.00660 | 3.30          | 0.00009 | 8.46          | 0.00001 |
| STM0759         | ybgS      | hypothetical protein STM0759                         | -0.73         | 0.81615 | 3.11          | 0.00006 | 9.52          | 0.00001 |
| STM0760         | aroG      | 3-deoxy-7-phosphoheptulonate synthase                | -0.32         | 0.56239 | -0.02         | 0.96131 | 1.12          | 0.11817 |
| STM0760         | aroG      | 3-deoxy-7-phosphoheptulonate synthase                | 1.52          | 0.03893 | 0.62          | 0.09448 | 1.43          | 0.00789 |
| STM0761         | STM0761   | fumarate hydratase                                   | -0.14         | 0.76189 | 0.02          | 0.95799 | -0.13         | 0.78809 |
| STM0761         | STM0761   | fumarate hydratase                                   | 3.16          | 0.01549 | 0.49          | 0.19623 | 0.71          | 0.15834 |
| STM0762         | STM0762   | fumarate hydratase                                   | 0.92          | 0.28285 | -0.39         | 0.30926 | 0.85          | 0.07664 |
| STM0762         | STM0762   | fumarate hydratase                                   | 1.23          | 0.18639 | 0.43          | 0.39019 | 0.28          | 0.55428 |
| STM0763,s       | STM0763,s | transcriptional regulator                            | 2.69          | 0.00567 | 1.89          | 0.00643 | 3.12          | 0.00020 |
| STM0763,s       | STM0763,s | transcriptional regulator                            | 3.16          | 0.00719 | 1.73          | 0.01187 | 3.56          | 0.00017 |
| STM0764         | STM0764   | transcriptional regulator                            | -0.51         | 0.40431 | -0.31         | 0.49949 | 0.13          | 0.85258 |
| STM0764         | STM0764   | transcriptional regulator                            | -0.48         | 0.43042 | -1.17         | 0.04245 | -0.26         | 0.62912 |
| STM0765         | STM0765   | putative cation transporter                          | -0.42         | 0.53080 | -1.04         | 0.01483 | 0.00          | 0.99713 |
| STM0765         | STM0765   | putative cation transporter                          | -0.38         | 0.70846 | -1.34         | 0.02847 | 0.11          | 0.85705 |
| STM0766         | dcoC      | putative oxaloacetate decarboxylase subunit gamma    | 2.20          | 0.15371 | -0.56         | 0.23268 | -1.09         | 0.06348 |
| STM0766         | dcoC      | putative oxaloacetate decarboxylase subunit gamma    | 2.85          | 0.07824 | -0.86         | 0.02614 | -0.10         | 0.83931 |
| STM0769         | STM0769   | putative cytoplasmic protein                         | -0.98         | 0.25928 | 0.53          | 0.51841 | -1.57         | 0.02006 |
| STM0769         | STM0769   | putative cytoplasmic protein                         | 0.80          | 0.09098 | 0.06          | 0.85837 | -0.31         | 0.42033 |

**Table S2.** Genome-wide expression of *Salmonella enterica* serovar Typhimurium inside fibroblasts

Intracellular WT 24 h p.i.      Intracellular *phoP* 24 h p.i.      Extracellular WT stationary phase

Relative to WT exponential LB      Relative to *phoP* exponential LB      Relative to WT exponential LB



| Systematic name | Gene    | Product                                                | log2Ratio (M) | p value | log2Ratio (M) | p value | log2Ratio (M) | p value |
|-----------------|---------|--------------------------------------------------------|---------------|---------|---------------|---------|---------------|---------|
| STM0770         | STM0770 | putative ABC transport protein                         | -1.15         | 0.04630 | 0.64          | 0.04612 | 0.33          | 0.52347 |
| STM0770         | STM0770 | putative ABC transport protein                         | -0.44         | 0.45468 | 0.32          | 0.32758 | 0.37          | 0.31515 |
| STM0771         | STM0771 | putative ABC-type cobalamin/Fe3+-siderophore transport | -1.11         | 0.06459 | 1.18          | 0.00410 | 0.06          | 0.90191 |
| STM0771         | STM0771 | putative ABC-type cobalamin/Fe3+-siderophore transport | 0.68          | 0.39100 | 2.27          | 0.00022 | 0.64          | 0.11767 |
| STM0772         | gpmA    | phosphoglyceromutase                                   | -0.47         | 0.29947 | 2.26          | 0.00014 | 0.85          | 0.03706 |
| STM0772         | gpmA    | phosphoglyceromutase                                   | 0.86          | 0.08950 | 2.37          | 0.00017 | 1.50          | 0.01346 |
| STM0773         | galM    | galactose-1-epimerase                                  | -1.45         | 0.01801 | 0.37          | 0.30677 | -0.61         | 0.10903 |
| STM0773         | galM    | galactose-1-epimerase                                  | -1.01         | 0.05261 | 0.82          | 0.04350 | -0.32         | 0.47937 |
| STM0774         | galK    | galactokinase                                          | -0.81         | 0.08485 | -0.24         | 0.53525 | -0.91         | 0.04600 |
| STM0774         | galK    | galactokinase                                          | 0.00          | 0.99279 | -0.07         | 0.84384 | -0.45         | 0.19446 |
| STM0775         | galT    | galactose-1-phosphate uridylyltransferase              | -1.77         | 0.04119 | -1.59         | 0.00590 | -1.53         | 0.00301 |
| STM0775         | galT    | galactose-1-phosphate uridylyltransferase              | -1.43         | 0.06694 | -1.11         | 0.00911 | -1.31         | 0.00570 |
| STM0776         | galE    | UDP-galactose 4-epimerase                              | 1.16          | 0.66633 | -0.81         | 0.02064 | 2.85          | 0.01103 |
| STM0776         | galE    | UDP-galactose 4-epimerase                              | 0.45          | 0.81180 | -0.65         | 0.05645 | 1.60          | 0.17138 |
| STM0777         | STM0777 | putative inner membrane protein                        | 0.47          | 0.26806 | -0.65         | 0.11001 | -0.10         | 0.80547 |
| STM0777         | STM0777 | putative inner membrane protein                        | 2.99          | 0.00773 | -0.44         | 0.54396 | 1.52          | 0.01210 |
| STM0778         | modF    | putative molybdenum transporter                        | -0.55         | 0.22891 | -0.29         | 0.29361 | -0.52         | 0.67240 |
| STM0778         | modF    | putative molybdenum transporter                        | 0.18          | 0.83865 | -0.02         | 0.96395 | -0.49         | 0.44905 |
| STM0779         | modE    | molybdate uptake operon transcriptional repressor      | -1.44         | 0.10095 | -0.09         | 0.82309 | -1.74         | 0.00995 |
| STM0779         | modE    | molybdate uptake operon transcriptional repressor      | -0.37         | 0.55169 | 0.57          | 0.11433 | -1.29         | 0.02660 |
| STM0781         | modA    | molybdate transporter                                  | -1.63         | 0.01426 | 1.17          | 0.00276 | -3.49         | 0.00144 |
| STM0781         | modA    | molybdate transporter                                  | -1.51         | 0.04257 | 1.48          | 0.00130 | -3.24         | 0.00091 |
| STM0782         | modB    | molybdate transport permease protein                   | -1.29         | 0.02828 | 0.12          | 0.69790 | -2.38         | 0.00051 |
| STM0782         | modB    | molybdate transport permease protein                   | -0.50         | 0.58841 | -0.24         | 0.49843 | -1.35         | 0.01770 |
| STM0783         | modC    | molybdate transporter                                  | -1.37         | 0.03235 | -0.43         | 0.16945 | -2.50         | 0.00161 |
| STM0783         | modC    | molybdate transporter                                  | -1.42         | 0.01976 | -0.31         | 0.26612 | -1.03         | 0.16591 |
| STM0784         | ybhA    | putative hydrolase                                     | 0.14          | 0.74642 | 0.29          | 0.47565 | 0.93          | 0.08458 |
| STM0784         | ybhA    | putative hydrolase                                     | -0.46         | 0.71380 | -0.12         | 0.71950 | -1.65         | 0.18597 |
| STM0785         | ybhE    | putative 3-carboxymuconate cyclase                     | -0.80         | 0.17278 | 0.20          | 0.51437 | -0.54         | 0.21735 |
| STM0785         | ybhE    | putative 3-carboxymuconate cyclase                     | 0.21          | 0.85257 | -0.01         | 0.98144 | -0.19         | 0.65066 |
| STM0786         | ybhC    | putative pectinesterase                                | -0.85         | 0.16839 | -0.47         | 0.12213 | -0.84         | 0.38052 |
| STM0786         | ybhC    | putative pectinesterase                                | -0.48         | 0.46251 | -1.30         | 0.00419 | -0.98         | 0.19818 |
| STM0787         | hutI    | imidazolonepropionase                                  | -0.74         | 0.27874 | 0.50          | 0.18597 | -0.69         | 0.13879 |
| STM0787         | hutI    | imidazolonepropionase                                  | 0.37          | 0.68282 | -0.09         | 0.79523 | 0.77          | 0.05525 |
| STM0788         | hutG    | formimidoylglutamate                                   | -0.55         | 0.31023 | -0.85         | 0.02410 | -0.80         | 0.03793 |
| STM0788         | hutG    | formimidoylglutamate                                   | 0.50          | 0.27957 | -0.26         | 0.42611 | 0.20          | 0.70055 |
| STM0789         | hutC    | histidine utilization repressor                        | -1.19         | 0.03508 | -1.33         | 0.00322 | 0.59          | 0.67098 |
| STM0789         | hutC    | histidine utilization repressor                        | -1.27         | 0.03158 | -1.62         | 0.14685 | -1.44         | 0.00992 |
| STM0791         | hutH    | histidine ammonia-lyase                                | -0.22         | 0.72937 | 0.37          | 0.34689 | 0.77          | 0.07556 |
| STM0791         | hutH    | histidine ammonia-lyase                                | -0.98         | 0.11344 | -0.11         | 0.75508 | -1.23         | 0.09196 |
| STM0792         | ybhB    | putative phospholipid-binding protein                  | 0.32          | 0.74820 | 0.70          | 0.04361 | 0.39          | 0.31997 |
| STM0792         | ybhB    | putative phospholipid-binding protein                  | 1.19          | 0.12999 | 0.63          | 0.07962 | 1.22          | 0.01499 |
| STM0793         | bioA    | adenosylmethionine--8-amino-7-oxononanoate             | -0.78         | 0.18239 | 1.45          | 0.00187 | -0.86         | 0.05953 |
| STM0793         | bioA    | adenosylmethionine--8-amino-7-oxononanoate             | 0.38          | 0.39271 | 1.55          | 0.00094 | 0.21          | 0.58027 |
| STM0794         | bioB    | biotin synthetase                                      | 0.97          | 0.29048 | 3.97          | 0.00009 | -0.17         | 0.81930 |
| STM0794         | bioB    | biotin synthetase                                      | 1.74          | 0.24403 | 2.93          | 0.00027 | 0.07          | 0.95719 |
| STM0795         | bioF    | 8-amino-7-oxononanoate synthase                        | 0.82          | 0.37389 | -0.49         | 0.42246 | -0.56         | 0.68128 |
| STM0795         | bioF    | 8-amino-7-oxononanoate synthase                        | 0.24          | 0.88427 | -1.08         | 0.05509 | 0.00          | 0.99968 |
| STM0796         | bioC    | biotin biosynthetic protein                            | 0.23          | 0.76572 | 2.01          | 0.00056 | -1.27         | 0.02940 |
| STM0796         | bioC    | biotin biosynthetic protein                            | 1.84          | 0.01530 | 1.86          | 0.00136 | 0.27          | 0.54311 |
| STM0797         | bioD    | dithiobiotin synthetase                                | 0.05          | 0.93655 | -0.59         | 0.14314 | -1.44         | 0.01558 |
| STM0797         | bioD    | dithiobiotin synthetase                                | 0.67          | 0.21970 | -0.54         | 0.18443 | -0.27         | 0.51805 |
| STM0798         | uvrB    | excinuclease ABC subunit B                             | -0.88         | 0.19252 | 0.00          | 0.99632 | 0.52          | 0.26405 |
| STM0798         | uvrB    | excinuclease ABC subunit B                             | 0.14          | 0.81485 | 0.26          | 0.41103 | -0.20         | 0.67210 |
| STM0800         | slrP    | leucine-rich repeat protein                            | 0.14          | 0.79305 | 0.75          | 0.07310 | 0.56          | 0.37201 |
| STM0800         | slrP    | leucine-rich repeat protein                            | 1.17          | 0.04629 | 0.29          | 0.37230 | 0.94          | 0.04324 |
| STM0801         | ybhK    | putative cytoplasmic protein                           | -0.36         | 0.49898 | 0.03          | 0.95969 | -0.08         | 0.90227 |
| STM0801         | ybhK    | putative cytoplasmic protein                           | 0.96          | 0.13892 | 0.77          | 0.05814 | 0.54          | 0.35049 |
| STM0802         | moaA    | molybdenum cofactor biosynthesis protein A             | -1.85         | 0.01305 | -1.02         | 0.01167 | -0.61         | 0.09036 |
| STM0802         | moaA    | molybdenum cofactor biosynthesis protein A             | -0.42         | 0.46345 | -0.90         | 0.02722 | 0.75          | 0.12561 |
| STM0803         | moaB    | molybdopterin biosynthetic protein B                   | -1.82         | 0.01408 | 0.11          | 0.73846 | -0.69         | 0.10917 |
| STM0803         | moaB    | molybdopterin biosynthetic protein B                   | -0.34         | 0.40507 | 0.19          | 0.58861 | -0.46         | 0.27630 |
| STM0804         | moaC    | molybdenum cofactor biosynthesis protein C             | -0.97         | 0.19898 | -1.62         | 0.00314 | -1.42         | 0.01273 |
| STM0804         | moaC    | molybdenum cofactor biosynthesis protein C             | -1.70         | 0.04692 | -1.14         | 0.00761 | -1.51         | 0.01177 |
| STM0805         | moaD    | molybdopterin biosynthetic protein                     | -0.39         | 0.48121 | -1.52         | 0.00521 | -1.37         | 0.03212 |
| STM0805         | moaD    | molybdopterin biosynthetic protein                     | -1.34         | 0.05364 | -1.99         | 0.00083 | -1.53         | 0.04263 |
| STM0806         | moaE    | molybdopterin converting factor subunit 2              | -1.55         | 0.04254 | -1.31         | 0.00302 | -0.53         | 0.18748 |
| STM0806         | moaE    | molybdopterin converting factor subunit 2              | -0.91         | 0.19658 | -0.64         | 0.04258 | -0.45         | 0.21976 |
| STM0807         | ybhL    | putative permease                                      | -1.13         | 0.03387 | 0.09          | 0.79460 | 1.28          | 0.00561 |
| STM0807         | ybhL    | putative permease                                      | -0.30         | 0.52769 | 0.17          | 0.60388 | 1.82          | 0.00227 |

**Table S2.** Genome-wide expression of *Salmonella enterica* serovar Typhimurium inside fibroblasts

|                 |         |                                                       | Intracellular WT<br>24 h p.i.                                                      |         | Intracellular <i>phoP</i><br>24 h p.i.                                              |         | Extracellular WT<br>stationary phase                                                |         |
|-----------------|---------|-------------------------------------------------------|------------------------------------------------------------------------------------|---------|-------------------------------------------------------------------------------------|---------|-------------------------------------------------------------------------------------|---------|
|                 |         |                                                       | Relative to WT<br>exponential LB                                                   |         | Relative to <i>phoP</i><br>exponential LB                                           |         | Relative to WT<br>exponential LB                                                    |         |
|                 |         |                                                       |  |         |  |         |  |         |
| Systematic name | Gene    | Product                                               | log2Ratio (M)                                                                      | p value | log2Ratio (M)                                                                       | p value | log2Ratio (M)                                                                       | p value |
| STM0808         | ybhM    | putative integral membrane protein                    | -1.61                                                                              | 0.01616 | -1.33                                                                               | 0.07752 | 0.94                                                                                | 0.05562 |
| STM0808         | ybhM    | putative integral membrane protein                    | -1.06                                                                              | 0.21280 | -0.69                                                                               | 0.29718 | 0.22                                                                                | 0.55880 |
| STM0809         | STM0809 | putative inner membrane protein                       | 0.86                                                                               | 0.25808 | -0.42                                                                               | 0.48517 | 0.37                                                                                | 0.30764 |
| STM0809         | STM0809 | putative inner membrane protein                       | 1.08                                                                               | 0.22297 | -0.98                                                                               | 0.04804 | 0.36                                                                                | 0.50578 |
| STM0810         | STM0810 | putative inner membrane protein                       | -0.09                                                                              | 0.91090 | -0.72                                                                               | 0.17242 | 0.45                                                                                | 0.44712 |
| STM0810         | STM0810 | putative inner membrane protein                       | 1.09                                                                               | 0.15154 | -0.80                                                                               | 0.12908 | 1.48                                                                                | 0.08681 |
| STM0811         | ybhN    | hypothetical protein STM0811                          | 1.92                                                                               | 0.11444 | -1.01                                                                               | 0.02281 | 0.65                                                                                | 0.37764 |
| STM0811         | ybhN    | hypothetical protein STM0811                          | 2.95                                                                               | 0.04243 | -1.29                                                                               | 0.00843 | 2.06                                                                                | 0.00257 |
| STM0812         | ybhO    | cardiolipin synthase                                  | 2.79                                                                               | 0.04229 | -0.39                                                                               | 0.42647 | 0.66                                                                                | 0.12855 |
| STM0812         | ybhO    | cardiolipin synthase                                  | 2.33                                                                               | 0.02172 | -0.23                                                                               | 0.73632 | 1.16                                                                                | 0.03045 |
| STM0813         | ybhP    | putative cytoplasmic protein                          | -1.44                                                                              | 0.04220 | -0.08                                                                               | 0.89527 | 0.11                                                                                | 0.85965 |
| STM0813         | ybhP    | putative cytoplasmic protein                          | 0.65                                                                               | 0.22022 | -0.21                                                                               | 0.61214 | 0.62                                                                                | 0.17046 |
| STM0814         | ybhQ    | putative inner membrane protein                       | -0.82                                                                              | 0.15344 | 0.78                                                                                | 0.06912 | 2.65                                                                                | 0.00071 |
| STM0814         | ybhQ    | putative inner membrane protein                       | 0.42                                                                               | 0.42163 | 1.50                                                                                | 0.00363 | 2.62                                                                                | 0.00056 |
| STM0815         | ybhR    | putative transport protein                            | -0.89                                                                              | 0.27929 | 0.15                                                                                | 0.77904 | 1.05                                                                                | 0.05011 |
| STM0815         | ybhR    | putative transport protein                            | -0.22                                                                              | 0.72148 | 0.53                                                                                | 0.23126 | 1.02                                                                                | 0.01504 |
| STM0816         | ybhS    | putative transport protein                            | -0.75                                                                              | 0.20812 | -0.40                                                                               | 0.41793 | -0.63                                                                               | 0.09411 |
| STM0816         | ybhS    | putative transport protein                            | -0.29                                                                              | 0.50429 | -0.97                                                                               | 0.01924 | 0.16                                                                                | 0.79242 |
| STM0817         | ybhF    | putative ABC-type multidrug transport system ATPase   | -0.28                                                                              | 0.50461 | 0.50                                                                                | 0.08959 | 0.46                                                                                | 0.20309 |
| STM0817         | ybhF    | putative ABC-type multidrug transport system ATPase   | 0.65                                                                               | 0.49654 | -0.50                                                                               | 0.22603 | -0.08                                                                               | 0.86863 |
| STM0818         | STM0818 | hypothetical protein STM0818                          | -0.35                                                                              | 0.63316 | 0.34                                                                                | 0.33294 | 0.05                                                                                | 0.91503 |
| STM0818         | STM0818 | hypothetical protein STM0818                          | -0.55                                                                              | 0.30483 | -0.75                                                                               | 0.06330 | 0.21                                                                                | 0.72966 |
| STM0819         | ybiH    | putative transcriptional repressor                    | -0.91                                                                              | 0.16634 | 0.01                                                                                | 0.98084 | -0.10                                                                               | 0.79213 |
| STM0819         | ybiH    | putative transcriptional repressor                    | -0.36                                                                              | 0.50004 | 0.08                                                                                | 0.79385 | 0.67                                                                                | 0.18852 |
| STM0820         | rhIE    | putative ATP-dependent RNA helicase                   | -1.05                                                                              | 0.04517 | -1.51                                                                               | 0.00238 | -2.57                                                                               | 0.00325 |
| STM0820         | rhIE    | putative ATP-dependent RNA helicase                   | 0.32                                                                               | 0.67685 | -0.92                                                                               | 0.02693 | -1.99                                                                               | 0.00206 |
| STM0821         | dinG    | SOS repair enzyme                                     | -0.35                                                                              | 0.41466 | -0.47                                                                               | 0.13256 | -0.04                                                                               | 0.93002 |
| STM0821         | dinG    | SOS repair enzyme                                     | 0.09                                                                               | 0.94322 | -1.27                                                                               | 0.00365 | 0.04                                                                                | 0.93002 |
| STM0822         | ybiB    | hypothetical protein STM0822                          | -0.74                                                                              | 0.49480 | -0.08                                                                               | 0.79321 | 0.30                                                                                | 0.72700 |
| STM0822         | ybiB    | hypothetical protein STM0822                          | 0.67                                                                               | 0.49952 | -0.32                                                                               | 0.41378 | -0.24                                                                               | 0.60466 |
| STM0823         | ybiJ    | putative periplasmic protein                          | -1.10                                                                              | 0.05689 | -0.08                                                                               | 0.85133 | 0.07                                                                                | 0.89180 |
| STM0823         | ybiJ    | putative periplasmic protein                          | 0.12                                                                               | 0.79518 | 0.11                                                                                | 0.77302 | 0.36                                                                                | 0.30509 |
| STM0825         | ybiI    | hypothetical protein STM0825                          | 0.75                                                                               | 0.27289 | 0.47                                                                                | 0.18345 | 2.08                                                                                | 0.00378 |
| STM0825         | ybiI    | hypothetical protein STM0825                          | 0.62                                                                               | 0.22160 | 0.23                                                                                | 0.54286 | 2.22                                                                                | 0.00107 |
| STM0826         | ybiN    | putative SAM-dependent methyltransferase              | -0.44                                                                              | 0.54856 | -1.01                                                                               | 0.04241 | -0.30                                                                               | 0.54316 |
| STM0826         | ybiN    | putative SAM-dependent methyltransferase              | 1.96                                                                               | 0.01709 | -0.57                                                                               | 0.11023 | -0.11                                                                               | 0.86528 |
| STM0827         | ybiO    | putative transport protein                            | -0.79                                                                              | 0.19981 | -0.60                                                                               | 0.06708 | -0.69                                                                               | 0.15406 |
| STM0827         | ybiO    | putative transport protein                            | 0.41                                                                               | 0.42557 | -0.79                                                                               | 0.05922 | -0.89                                                                               | 0.04142 |
| STM0828         | glnQ    | glutamine ABC transporter ATP-binding component       | -0.35                                                                              | 0.49076 | -0.91                                                                               | 0.01141 | -1.56                                                                               | 0.00541 |
| STM0828         | glnQ    | glutamine ABC transporter ATP-binding component       | -0.46                                                                              | 0.73458 | -1.15                                                                               | 0.00336 | -1.93                                                                               | 0.00386 |
| STM0829         | glnP    | glutamine ABC transporter permease component          | -2.72                                                                              | 0.00654 | -1.87                                                                               | 0.00141 | -1.05                                                                               | 0.07198 |
| STM0829         | glnP    | glutamine ABC transporter permease component          | 0.05                                                                               | 0.96615 | -1.21                                                                               | 0.01886 | -1.70                                                                               | 0.00156 |
| STM0830         | glnH    | glutamine ABC transporter periplasmic-binding protein | -2.45                                                                              | 0.00864 | -0.26                                                                               | 0.38005 | -1.25                                                                               | 0.01095 |
| STM0830         | glnH    | glutamine ABC transporter periplasmic-binding protein | -2.56                                                                              | 0.03748 | -0.51                                                                               | 0.17739 | -1.69                                                                               | 0.00197 |
| STM0831         | dps     | DNA protection during starvation conditions           | -1.33                                                                              | 0.02858 | 2.58                                                                                | 0.00015 | 5.89                                                                                | 0.00012 |
| STM0831         | dps     | DNA protection during starvation conditions           | -0.26                                                                              | 0.64662 | 2.79                                                                                | 0.00031 | 6.38                                                                                | 0.00002 |
| STM0832         | ybiF    | putative permease                                     | -1.00                                                                              | 0.16202 | -0.54                                                                               | 0.12564 | 1.27                                                                                | 0.01979 |
| STM0832         | ybiF    | putative permease                                     | -0.89                                                                              | 0.24695 | 0.02                                                                                | 0.93942 | 1.85                                                                                | 0.00594 |
| STM0833         | ompX    | outer membrane protein X                              | -2.19                                                                              | 0.01443 | -1.23                                                                               | 0.01313 | 0.45                                                                                | 0.23607 |
| STM0833         | ompX    | outer membrane protein X                              | -0.83                                                                              | 0.12861 | -0.92                                                                               | 0.01081 | 0.63                                                                                | 0.09371 |
| STM0834         | ybiP    | putative Integral membrane protein                    | 0.02                                                                               | 0.97161 | -1.16                                                                               | 0.01109 | 0.71                                                                                | 0.07865 |
| STM0834         | ybiP    | putative Integral membrane protein                    | 0.38                                                                               | 0.59869 | -0.57                                                                               | 0.12223 | 1.02                                                                                | 0.01647 |
| STM0835         | STM0835 | putative Mn-dependent transcriptional regulator       | -0.03                                                                              | 0.96078 | 0.14                                                                                | 0.66481 | -0.51                                                                               | 0.23395 |
| STM0835         | STM0835 | putative Mn-dependent transcriptional regulator       | -0.61                                                                              | 0.17818 | -0.09                                                                               | 0.78935 | 0.13                                                                                | 0.76918 |
| STM0836         | ybiR    | putative transporter                                  | -0.52                                                                              | 0.22605 | -0.72                                                                               | 0.03904 | 0.10                                                                                | 0.79934 |
| STM0836         | ybiR    | putative transporter                                  | 1.09                                                                               | 0.09758 | -0.51                                                                               | 0.09628 | 0.19                                                                                | 0.62087 |
| STM0837         | ybiS    | putative periplasmic protein                          | -0.94                                                                              | 0.09011 | -0.56                                                                               | 0.13393 | -0.62                                                                               | 0.10497 |
| STM0837         | ybiS    | putative periplasmic protein                          | 1.33                                                                               | 0.05743 | -1.23                                                                               | 0.00307 | -1.55                                                                               | 0.03610 |
| STM0838         | ybiT    | putative ABC transporter ATPase component             | 0.23                                                                               | 0.78453 | 1.04                                                                                | 0.00500 | -0.91                                                                               | 0.19485 |
| STM0838         | ybiT    | putative ABC transporter ATPase component             | 0.84                                                                               | 0.27015 | 1.52                                                                                | 0.00339 | -1.08                                                                               | 0.04007 |
| STM0839         | STM0839 | putative inner membrane protein                       | -0.08                                                                              | 0.85597 | 0.96                                                                                | 0.03644 | -0.42                                                                               | 0.55002 |
| STM0839         | STM0839 | putative inner membrane protein                       | -0.52                                                                              | 0.54376 | 0.11                                                                                | 0.75188 | -0.45                                                                               | 0.73380 |
| STM0840         | ybiV(2) | putative hydrolase                                    | -1.79                                                                              | 0.02177 | -0.02                                                                               | 0.96375 | -1.79                                                                               | 0.00421 |
| STM0840         | ybiV(2) | putative hydrolase                                    | -0.77                                                                              | 0.12699 | -0.46                                                                               | 0.42042 | -0.52                                                                               | 0.20117 |
| STM0841         | ybiU    | putative cytoplasmic protein                          | 0.23                                                                               | 0.55991 | 1.16                                                                                | 0.01013 | -0.66                                                                               | 0.10868 |
| STM0841         | ybiU    | putative cytoplasmic protein                          | 1.97                                                                               | 0.02160 | 1.30                                                                                | 0.00215 | 0.60                                                                                | 0.15298 |
| STM0842         | ybiV(1) | putative hydrolase                                    | -0.56                                                                              | 0.41616 | -1.38                                                                               | 0.00640 | -1.62                                                                               | 0.03631 |
| STM0842         | ybiV(1) | putative hydrolase                                    | 1.71                                                                               | 0.34493 | -0.73                                                                               | 0.05189 | -0.33                                                                               | 0.68698 |
| STM0843         | pflF    | putative pyruvate formate lyase                       | -0.27                                                                              | 0.63515 | 0.40                                                                                | 0.33625 | -0.27                                                                               | 0.64834 |
| STM0843         | pflF    | putative pyruvate formate lyase                       | 0.45                                                                               | 0.45778 | -0.38                                                                               | 0.22833 | 0.71                                                                                | 0.35121 |

**Table S2.** Genome-wide expression of *Salmonella enterica* serovar Typhimurium inside fibroblasts

Intracellular WT 24 h.p.i.      Intracellular *phoP* 24 h.p.i.      Extracellular WT stationary phase

Relative to WT exponential LB      Relative to *phoP* exponential LB      Relative to WT exponential LB



| Systematic name | Gene    | Product                                              | log2Ratio (M) | p value | log2Ratio (M) | p value | log2Ratio (M) | p value |
|-----------------|---------|------------------------------------------------------|---------------|---------|---------------|---------|---------------|---------|
| STM0844         | pflE    | putative pyruvate formate lyase activating enzyme    | -0.83         | 0.40613 | -0.35         | 0.43823 | -1.45         | 0.01557 |
| STM0844         | pflE    | putative pyruvate formate lyase activating enzyme    | 0.49          | 0.38161 | -0.67         | 0.13499 | 1.02          | 0.13838 |
| STM0845         | moeB    | molybdopterin biosynthesis protein MoeB              | -0.29         | 0.64755 | -0.59         | 0.08349 | -1.47         | 0.01144 |
| STM0845         | moeB    | molybdopterin biosynthesis protein MoeB              | 0.95          | 0.46345 | -0.41         | 0.21876 | -1.13         | 0.06355 |
| STM0846         | moeA    | molybdopterin biosynthesis protein                   | -1.23         | 0.02821 | -0.54         | 0.10700 | -0.96         | 0.19355 |
| STM0846         | moeA    | molybdopterin biosynthesis protein                   | -0.24         | 0.62471 | -0.71         | 0.04900 | 1.51          | 0.01768 |
| STM0847         | ybiK    | putative asparaginase                                | -1.80         | 0.04570 | -0.53         | 0.08690 | -1.26         | 0.04339 |
| STM0847         | ybiK    | putative asparaginase                                | 0.57          | 0.34702 | 0.04          | 0.92574 | 0.01          | 0.98561 |
| STM0848         | yliA    | putative ABC transporter ATPase components           | -0.50         | 0.22544 | -0.98         | 0.08155 | -1.52         | 0.00672 |
| STM0848         | yliA    | putative ABC transporter ATPase components           | -0.44         | 0.33126 | -1.38         | 0.00257 | -1.10         | 0.05677 |
| STM0849         | yliB    | putative ABC transporter periplasmic binding protein | -0.89         | 0.09059 | 0.10          | 0.82055 | 0.13          | 0.74089 |
| STM0849         | yliB    | putative ABC transporter periplasmic binding protein | -1.21         | 0.03061 | -0.01         | 0.97207 | -1.05         | 0.08837 |
| STM0850         | yliC    | putative ABC transporter periplasmic binding protein | -1.45         | 0.07325 | -0.44         | 0.15452 | -1.63         | 0.00631 |
| STM0850         | yliC    | putative ABC transporter periplasmic binding protein | -0.10         | 0.81828 | -1.32         | 0.00867 | -0.94         | 0.16139 |
| STM0851         | yliD    | putative ABC transporter inner membrane component    | -1.80         | 0.01038 | -1.11         | 0.00853 | -1.09         | 0.15326 |
| STM0851         | yliD    | putative ABC transporter inner membrane component    | -0.59         | 0.57209 | -1.18         | 0.00650 | -1.38         | 0.01489 |
| STM0852         | yliG    | putative FeS oxidoreductase                          | -1.80         | 0.02181 | -1.00         | 0.01547 | -2.09         | 0.00526 |
| STM0852         | yliG    | putative FeS oxidoreductase                          | -0.66         | 0.16795 | -2.00         | 0.00031 | -1.35         | 0.04534 |
| STM0853         | yliH    | putative cytoplasmic protein                         | -0.35         | 0.47149 | 1.89          | 0.00077 | 6.49          | 0.00001 |
| STM0853         | yliH    | putative cytoplasmic protein                         | -1.19         | 0.04983 | 2.01          | 0.00024 | 6.40          | 0.00001 |
| STM0854         | STM0854 | putative cytoplasmic protein                         | 0.28          | 0.69620 | 0.30          | 0.46696 | 1.75          | 0.00568 |
| STM0854         | STM0854 | putative cytoplasmic protein                         | 1.26          | 0.03242 | 0.17          | 0.81126 | 2.59          | 0.00068 |
| STM0855         | STM0855 | putative electron transfer protein beta subunit      | 0.11          | 0.87642 | -0.09         | 0.79574 | -0.79         | 0.08954 |
| STM0855         | STM0855 | putative electron transfer protein beta subunit      | 0.62          | 0.31930 | 0.42          | 0.29415 | 1.11          | 0.06873 |
| STM0856         | STM0856 | putative electron transfer protein alpha subunit     | 0.09          | 0.89999 | 0.04          | 0.92012 | -0.93         | 0.04692 |
| STM0856         | STM0856 | putative electron transfer protein alpha subunit     | 1.10          | 0.09525 | 0.02          | 0.96521 | 0.01          | 0.98461 |
| STM0857         | STM0857 | putative acyl-CoA dehydrogenase                      | 1.37          | 0.31205 | -0.12         | 0.75579 | -0.17         | 0.85119 |
| STM0857         | STM0857 | putative acyl-CoA dehydrogenase                      | 1.32          | 0.07584 | 0.34          | 0.36979 | 2.42          | 0.04497 |
| STM0858         | STM0858 | putative dehydrogenase                               | 0.89          | 0.07050 | 0.42          | 0.35765 | 0.05          | 0.96299 |
| STM0858         | STM0858 | putative dehydrogenase                               | 2.59          | 0.00791 | 0.50          | 0.17200 | 2.49          | 0.00125 |
| STM0859         | STM0859 | putative transcriptional regulator                   | -0.17         | 0.76043 | -0.54         | 0.20971 | 0.21          | 0.64024 |
| STM0859         | STM0859 | putative transcriptional regulator                   | -0.49         | 0.40170 | 0.08          | 0.85622 | -1.87         | 0.02240 |
| STM0860         | STM0860 | putative inner membrane protein                      | -0.31         | 0.45012 | 1.03          | 0.04224 | 0.12          | 0.76280 |
| STM0860         | STM0860 | putative inner membrane protein                      | 0.75          | 0.16362 | 0.57          | 0.19652 | 0.21          | 0.62768 |
| STM0862         | yliJ    | putative glutathione S-transferase                   | -0.71         | 0.16521 | 0.92          | 0.01542 | -0.68         | 0.14952 |
| STM0862         | yliJ    | putative glutathione S-transferase                   | -0.11         | 0.88091 | 1.48          | 0.00341 | -0.50         | 0.35846 |
| STM0863         | dacC    | D-alanyl-D-alanine carboxypeptidase                  | -0.52         | 0.20626 | 0.41          | 0.28451 | -0.12         | 0.81762 |
| STM0863         | dacC    | D-alanyl-D-alanine carboxypeptidase                  | -0.76         | 0.13555 | -0.11         | 0.76620 | -0.28         | 0.72924 |
| STM0864         | deoR    | deoxyribose operon transcriptional repressor         | 1.09          | 0.35237 | 0.39          | 0.29360 | 0.23          | 0.80029 |
| STM0864         | deoR    | deoxyribose operon transcriptional repressor         | 0.88          | 0.41626 | 0.07          | 0.85600 | -0.51         | 0.31442 |
| STM0865         | ybjG    | putative permease                                    | -1.00         | 0.05298 | -0.24         | 0.49611 | -1.05         | 0.06086 |
| STM0865         | ybjG    | putative permease                                    | 0.34          | 0.76280 | -0.45         | 0.21875 | -0.82         | 0.27042 |
| STM0866         | mdfA    | multidrug translocase                                | -0.99         | 0.10451 | -0.77         | 0.04658 | -1.40         | 0.03620 |
| STM0866         | mdfA    | multidrug translocase                                | -0.21         | 0.82751 | -1.21         | 0.01282 | -0.65         | 0.17806 |
| STM0867         | STM0867 | putative hydrolase                                   | -0.33         | 0.64833 | -0.37         | 0.29805 | -0.63         | 0.24396 |
| STM0867         | STM0867 | putative hydrolase                                   | 0.31          | 0.61744 | -0.07         | 0.85046 | -0.27         | 0.61014 |
| STM0868         | STM0868 | putative transport protein/regulator                 | 0.96          | 0.06012 | -0.32         | 0.40616 | 0.05          | 0.93258 |
| STM0868         | STM0868 | putative transport protein/regulator                 | 1.02          | 0.10070 | -0.41         | 0.43103 | 1.11          | 0.16689 |
| STM0869         | STM0869 | putative regulatory protein                          | -0.87         | 0.20928 | 0.40          | 0.24294 | -0.30         | 0.66060 |
| STM0869         | STM0869 | putative regulatory protein                          | -0.97         | 0.42579 | -0.90         | 0.03751 | -0.13         | 0.76404 |
| STM0870         | STM0870 | hypothetical protein STM0870                         | -0.97         | 0.19975 | -0.99         | 0.00848 | -2.37         | 0.00100 |
| STM0870         | STM0870 | hypothetical protein STM0870                         | 0.08          | 0.89608 | -0.76         | 0.10808 | -0.61         | 0.35839 |
| STM0871         | ybjM    | putative inner membrane protein                      | -1.53         | 0.03988 | 0.26          | 0.48678 | -0.42         | 0.42170 |
| STM0871         | ybjM    | putative inner membrane protein                      | -0.52         | 0.39936 | 0.48          | 0.12184 | -1.20         | 0.01635 |
| STM0872         | grxA    | glutaredoxin 1                                       | -0.98         | 0.11670 | 0.30          | 0.48187 | -0.81         | 0.18102 |
| STM0872         | grxA    | glutaredoxin 1                                       | 0.67          | 0.13529 | 0.48          | 0.27176 | 0.62          | 0.15897 |
| STM0873         | ybjC    | putative inner membrane protein                      | -0.83         | 0.43042 | -0.17         | 0.58715 | -1.53         | 0.00573 |
| STM0873         | ybjC    | putative inner membrane protein                      | -0.66         | 0.17044 | -0.32         | 0.33555 | 0.53          | 0.44021 |
| STM0874         | mdaA    | oxygen-insensitive NADPH nitroreductase              | -0.23         | 0.60031 | 0.05          | 0.89029 | -1.13         | 0.02981 |
| STM0874         | mdaA    | oxygen-insensitive NADPH nitroreductase              | -0.01         | 0.98763 | -0.19         | 0.54022 | -0.73         | 0.08846 |
| STM0875         | rimK    | ribosomal protein S6 modification protein            | -1.06         | 0.09512 | -0.71         | 0.08858 | -0.89         | 0.08828 |
| STM0875         | rimK    | ribosomal protein S6 modification protein            | -0.74         | 0.12906 | -0.73         | 0.06909 | -1.92         | 0.00074 |
| STM0876         | ybjN    | putative cytoplasmic protein                         | -1.67         | 0.02635 | -0.84         | 0.05810 | -2.15         | 0.00428 |
| STM0876         | ybjN    | putative cytoplasmic protein                         | -0.90         | 0.07573 | -0.58         | 0.10273 | -1.27         | 0.05414 |
| STM0877         | potF    | putrescine transporter                               | 0.68          | 0.13498 | 0.80          | 0.04238 | 0.84          | 0.03362 |
| STM0877         | potF    | putrescine transporter                               | 1.60          | 0.08078 | 0.87          | 0.03303 | 0.78          | 0.11804 |
| STM0878         | potG    | putrescine transporter                               | 0.88          | 0.36741 | -0.56         | 0.25993 | -0.82         | 0.33959 |
| STM0878         | potG    | putrescine transporter                               | 2.37          | 0.00956 | -1.84         | 0.00324 | 0.42          | 0.33734 |
| STM0879         | potH    | putrescine transporter                               | -1.47         | 0.26495 | -1.67         | 0.00631 | -1.22         | 0.08955 |
| STM0879         | potH    | putrescine transporter                               | -1.21         | 0.17879 | -2.30         | 0.01570 | -1.34         | 0.07016 |

**Table S2.** Genome-wide expression of *Salmonella enterica* serovar Typhimurium inside fibroblasts

Intracellular WT 24 h.p.i.      Intracellular *phoP* 24 h.p.i.      Extracellular WT stationary phase

Relative to WT exponential LB      Relative to *phoP* exponential LB      Relative to WT exponential LB



| Systematic name | Gene    | Product                                         | log2Ratio (M) | p value | log2Ratio (M) | p value | log2Ratio (M) | p value |
|-----------------|---------|-------------------------------------------------|---------------|---------|---------------|---------|---------------|---------|
| STM0880         | potI    | putrescine transporter                          | 0.01          | 0.98861 | 0.12          | 0.81308 | -0.57         | 0.24241 |
| STM0880         | potI    | putrescine transporter                          | 1.01          | 0.08765 | -0.24         | 0.41497 | 0.50          | 0.26967 |
| STM0881         | ybjO    | putative inner membrane protein                 | -1.94         | 0.01562 | -0.25         | 0.55465 | -0.89         | 0.09474 |
| STM0881         | ybjO    | putative inner membrane protein                 | -0.87         | 0.27512 | -1.18         | 0.00656 | -0.40         | 0.45561 |
| STM0882         | ybjF    | 23S rRNA (uracil-5-)-methyltransferase          | -0.69         | 0.21998 | -0.62         | 0.23793 | -0.12         | 0.85588 |
| STM0882         | ybjF    | 23S rRNA (uracil-5-)-methyltransferase          | 2.30          | 0.35495 | -0.75         | 0.08871 | -0.31         | 0.42713 |
| STM0884         | ulaA    | ascorbate-specific PTS system enzyme IIC        | 0.45          | 0.64341 | 0.55          | 0.49988 | -0.68         | 0.19903 |
| STM0884         | ulaA    | ascorbate-specific PTS system enzyme IIC        | 1.53          | 0.04046 | -1.56         | 0.05640 | -2.23         | 0.00194 |
| STM0885         | STM0885 | putative inner membrane protein                 | -0.98         | 0.19499 | -1.09         | 0.00611 | -1.50         | 0.11386 |
| STM0885         | STM0885 | putative inner membrane protein                 | 0.19          | 0.71609 | -0.98         | 0.03673 | -0.91         | 0.06968 |
| STM0886         | STM0886 | putative sulfatase                              | 0.60          | 0.31855 | 0.47          | 0.38937 | 0.70          | 0.19859 |
| STM0886         | STM0886 | putative sulfatase                              | 1.29          | 0.03310 | 1.11          | 0.00700 | 0.78          | 0.11698 |
| STM0887         | artJ    | arginine transport system component             | 0.22          | 0.74788 | 1.81          | 0.00341 | 0.93          | 0.06005 |
| STM0887         | artJ    | arginine transport system component             | 0.30          | 0.59477 | 1.41          | 0.00554 | 0.85          | 0.04175 |
| STM0888         | artM    | arginine transport system component             | -1.42         | 0.02605 | -0.24         | 0.51415 | -0.87         | 0.10506 |
| STM0888         | artM    | arginine transport system component             | -0.19         | 0.63111 | 0.28          | 0.31690 | 0.24          | 0.52054 |
| STM0889         | artQ    | arginine transport system component             | -1.67         | 0.01773 | -0.85         | 0.02057 | -3.54         | 0.00190 |
| STM0889         | artQ    | arginine transport system component             | -0.53         | 0.36190 | -0.52         | 0.12037 | -1.69         | 0.00350 |
| STM0890         | artI    | arginine transport system                       | -0.99         | 0.04923 | -0.16         | 0.58707 | -1.42         | 0.01057 |
| STM0890         | artI    | arginine transport system                       | -1.54         | 0.02888 | -0.06         | 0.86760 | -1.48         | 0.01186 |
| STM0891         | artP    | arginine transport system                       | -0.39         | 0.45134 | 0.14          | 0.67136 | -1.00         | 0.02377 |
| STM0891         | artP    | arginine transport system                       | -0.84         | 0.10008 | 0.50          | 0.09368 | -0.24         | 0.58171 |
| STM0892         | ybjP    | putative lipoprotein                            | -0.94         | 0.29599 | 0.28          | 0.47627 | -0.40         | 0.27265 |
| STM0892         | ybjP    | putative lipoprotein                            | -0.23         | 0.69232 | 0.11          | 0.82309 | 0.29          | 0.49911 |
| STM0893         | STM0893 | putative integrase                              | -1.44         | 0.02031 | -0.68         | 0.04303 | -1.16         | 0.07300 |
| STM0893         | STM0893 | putative integrase                              | -1.83         | 0.05667 | -0.95         | 0.01684 | -1.76         | 0.04318 |
| STM0898         | STM0898 | putative transcriptional regulator              | -0.40         | 0.37430 | 0.96          | 0.01175 | -0.64         | 0.14675 |
| STM0898         | STM0898 | putative transcriptional regulator              | 0.09          | 0.82483 | 0.62          | 0.08212 | 0.54          | 0.47864 |
| STM0906         | STM0906 | hypothetical protein STM0906                    | 1.12          | 0.04735 | 0.32          | 0.64151 | -0.13         | 0.80083 |
| STM0906         | STM0906 | hypothetical protein STM0906                    | 2.04          | 0.01428 | 0.14          | 0.69426 | 0.26          | 0.57306 |
| STM0907         | STM0907 | putative chitinase                              | 1.17          | 0.13687 | 0.77          | 0.03596 | -0.15         | 0.83913 |
| STM0907         | STM0907 | putative chitinase                              | 2.55          | 0.05946 | 0.29          | 0.47297 | 1.59          | 0.03962 |
| STM0908         | STM0908 | hypothetical protein STM0908                    | 2.58          | 0.05170 | 1.11          | 0.01948 | 4.05          | 0.00147 |
| STM0908         | STM0908 | hypothetical protein STM0908                    | 2.81          | 0.00661 | 0.18          | 0.51632 | 3.57          | 0.00007 |
| STM0930         | orfB    | hypothetical protein STM0930                    | 0.35          | 0.46502 | 1.30          | 0.00481 | 0.41          | 0.26187 |
| STM0930         | orfB    | hypothetical protein STM0930                    | 1.23          | 0.07261 | 1.06          | 0.00954 | 1.25          | 0.01490 |
| STM0931         | ybjR    | putative amidinase                              | -0.48         | 0.49835 | -0.74         | 0.09631 | -0.81         | 0.19238 |
| STM0931         | ybjR    | putative amidinase                              | 0.32          | 0.59828 | -0.15         | 0.58441 | -0.40         | 0.36237 |
| STM0932         | STM0932 | putative nucleoside-diphosphate-sugar epimerase | -0.29         | 0.62319 | 0.11          | 0.77531 | -2.10         | 0.00469 |
| STM0932         | STM0932 | putative nucleoside-diphosphate-sugar epimerase | 0.76          | 0.28474 | -0.04         | 0.92343 | -0.99         | 0.05456 |
| STM0933         | ybjT    | putative nucleoside-diphosphate-sugar epimerase | -0.08         | 0.86817 | -0.35         | 0.28887 | -0.14         | 0.89389 |
| STM0933         | ybjT    | putative nucleoside-diphosphate-sugar epimerase | 2.75          | 0.11638 | -0.42         | 0.28895 | -1.22         | 0.04261 |
| STM0934         | ltaA    | L-allo-threonine aldolase                       | -1.49         | 0.02193 | -0.49         | 0.15578 | -1.45         | 0.00343 |
| STM0934         | ltaA    | L-allo-threonine aldolase                       | -0.98         | 0.08071 | -0.82         | 0.03137 | -0.84         | 0.13643 |
| STM0935         | poxB    | pyruvate dehydrogenase                          | -0.97         | 0.15104 | 0.99          | 0.04330 | 1.89          | 0.00791 |
| STM0935         | poxB    | pyruvate dehydrogenase                          | -0.23         | 0.76369 | 1.30          | 0.00239 | 2.00          | 0.00059 |
| STM0936         | hcr     | NADH oxidoreductase                             | -0.77         | 0.39570 | 0.66          | 0.21217 | -0.27         | 0.55140 |
| STM0936         | hcr     | NADH oxidoreductase                             | 1.18          | 0.14061 | 0.20          | 0.48678 | -0.14         | 0.87683 |
| STM0937         | hcp     | hydroxylamine reductase                         | -1.23         | 0.04911 | 0.35          | 0.37724 | 0.06          | 0.91566 |
| STM0937         | hcp     | hydroxylamine reductase                         | 0.18          | 0.66039 | 0.50          | 0.27490 | -0.22         | 0.70723 |
| STM0938         | ybjE    | putative inner membrane protein                 | -0.42         | 0.47100 | -0.53         | 0.15935 | -0.92         | 0.05732 |
| STM0938         | ybjE    | putative inner membrane protein                 | 0.18          | 0.71116 | 1.07          | 0.12842 | 0.13          | 0.78570 |
| STM0939         | ybjD    | hypothetical protein STM0939                    | -2.69         | 0.01436 | -0.29         | 0.48875 | -2.22         | 0.00110 |
| STM0939         | ybjD    | hypothetical protein STM0939                    | -1.34         | 0.02346 | -0.88         | 0.01639 | -2.34         | 0.00026 |
| STM0940         | ybjX    | VirK-like protein                               | -2.40         | 0.00791 | 0.01          | 0.98646 | -3.00         | 0.00010 |
| STM0940         | ybjX    | VirK-like protein                               | -1.34         | 0.02148 | -0.34         | 0.32708 | -2.18         | 0.00186 |
| STM0941         | ybjY    | hypothetical protein STM0941                    | 0.95          | 0.10106 | 0.93          | 0.01880 | -0.65         | 0.20262 |
| STM0941         | ybjY    | hypothetical protein STM0941                    | 1.32          | 0.02347 | 1.11          | 0.00756 | 0.05          | 0.89836 |
| STM0942         | ybjZ    | putative transport protein                      | 1.22          | 0.33309 | 0.50          | 0.21501 | 0.27          | 0.49985 |
| STM0942         | ybjZ    | putative transport protein                      | 0.05          | 0.91057 | 0.86          | 0.01981 | 0.95          | 0.03923 |
| STM0943         | cspD    | stress response protein                         | -0.61         | 0.36178 | 3.26          | 0.00004 | 2.37          | 0.00048 |
| STM0943         | cspD    | stress response protein                         | -0.04         | 0.95007 | 2.98          | 0.00047 | 3.23          | 0.00021 |
| STM0944         | clpS    | ATP-dependent Clp protease adaptor protein ClpS | 0.11          | 0.83854 | 2.09          | 0.00027 | 0.83          | 0.03810 |
| STM0944         | clpS    | ATP-dependent Clp protease adaptor protein ClpS | 0.82          | 0.35348 | 1.67          | 0.00068 | 1.40          | 0.01099 |
| STM0945         | clpA    | ATP-binding subunit of serine protease          | 1.16          | 0.04832 | 1.11          | 0.00521 | 1.99          | 0.00318 |
| STM0945         | clpA    | ATP-binding subunit of serine protease          | 2.08          | 0.00851 | 1.11          | 0.00671 | 2.97          | 0.00019 |
| STM0947         | STM0947 | putative integrase                              | -0.32         | 0.59866 | 0.63          | 0.61227 | 0.39          | 0.44793 |
| STM0947         | STM0947 | putative integrase                              | 1.08          | 0.17495 | -0.20         | 0.50397 | 1.28          | 0.00563 |
| STM0948         | STM0948 | putative cytoplasmic protein                    | 0.79          | 0.22160 | 0.80          | 0.02355 | 1.41          | 0.00808 |
| STM0948         | STM0948 | putative cytoplasmic protein                    | 2.13          | 0.01399 | 0.39          | 0.33010 | 3.24          | 0.00023 |

**Table S2.** Genome-wide expression of *Salmonella enterica* serovar Typhimurium inside fibroblasts

|                 |         |                                                      | Intracellular WT<br>24 h p.i.                                                      |         | Intracellular <i>phoP</i><br>24 h p.i.                                              |         | Extracellular WT<br>stationary phase                                                |         |
|-----------------|---------|------------------------------------------------------|------------------------------------------------------------------------------------|---------|-------------------------------------------------------------------------------------|---------|-------------------------------------------------------------------------------------|---------|
|                 |         |                                                      | Relative to WT<br>exponential LB                                                   |         | Relative to <i>phoP</i><br>exponential LB                                           |         | Relative to WT<br>exponential LB                                                    |         |
|                 |         |                                                      |  |         |  |         |  |         |
| Systematic name | Gene    | Product                                              | log2Ratio (M)                                                                      | p value | log2Ratio (M)                                                                       | p value | log2Ratio (M)                                                                       | p value |
| STM0949         | serW    | STM0949                                              | -0.19                                                                              | 0.75051 | -1.18                                                                               | 0.00758 | 1.65                                                                                | 0.00167 |
| STM0949         | serW    | STM0949                                              | 0.95                                                                               | 0.08508 | -1.16                                                                               | 0.05633 | 2.13                                                                                | 0.00091 |
| STM0950         | STM0950 | SlsA                                                 | 0.00                                                                               | 0.99547 | 0.92                                                                                | 0.01314 | 2.82                                                                                | 0.00029 |
| STM0950         | STM0950 | SlsA                                                 | 0.00                                                                               | 0.99568 | 0.85                                                                                | 0.01252 | 3.00                                                                                | 0.00011 |
| STM0951         | STM0951 | putative cytoplasmic protein                         | -0.37                                                                              | 0.68802 | 1.05                                                                                | 0.01467 | 2.08                                                                                | 0.00612 |
| STM0951         | STM0951 | putative cytoplasmic protein                         | 1.63                                                                               | 0.02953 | 0.99                                                                                | 0.02051 | 2.72                                                                                | 0.00156 |
| STM0952         | STM0952 | putative transcriptional regulator                   | -1.13                                                                              | 0.05254 | -0.55                                                                               | 0.09679 | -2.36                                                                               | 0.00477 |
| STM0952         | STM0952 | putative transcriptional regulator                   | -0.07                                                                              | 0.88427 | 0.06                                                                                | 0.88217 | -1.42                                                                               | 0.00677 |
| STM0953         | infA    | translation initiation factor IF-1                   | -2.58                                                                              | 0.00689 | -1.05                                                                               | 0.01609 | -3.19                                                                               | 0.00103 |
| STM0953         | infA    | translation initiation factor IF-1                   | -0.20                                                                              | 0.79237 | -0.81                                                                               | 0.03405 | -2.32                                                                               | 0.00111 |
| STM0955         | aat     | leucyl/phenylalanyl-tRNA--protein transferase        | -1.51                                                                              | 0.05330 | -0.87                                                                               | 0.01277 | -1.36                                                                               | 0.00958 |
| STM0955         | aat     | leucyl/phenylalanyl-tRNA--protein transferase        | -1.36                                                                              | 0.04864 | -1.40                                                                               | 0.00173 | -0.44                                                                               | 0.54234 |
| STM0956         | cydC    | cytochrome-related transporter                       | -1.45                                                                              | 0.02504 | -1.20                                                                               | 0.00783 | -1.69                                                                               | 0.00342 |
| STM0956         | cydC    | cytochrome-related transporter                       | -3.16                                                                              | 0.01468 | -1.04                                                                               | 0.01019 | -1.71                                                                               | 0.00502 |
| STM0957         | cydD    | cytochrome-related transporter                       | -2.01                                                                              | 0.01272 | -1.97                                                                               | 0.00048 | -2.76                                                                               | 0.00033 |
| STM0957         | cydD    | cytochrome-related transporter                       | -2.04                                                                              | 0.01417 | -1.62                                                                               | 0.00123 | -2.38                                                                               | 0.00271 |
| STM0958         | trxB    | thioredoxin reductase                                | -1.51                                                                              | 0.06815 | -0.82                                                                               | 0.01693 | -3.48                                                                               | 0.00009 |
| STM0958         | trxB    | thioredoxin reductase                                | -0.45                                                                              | 0.62331 | -0.86                                                                               | 0.02518 | -2.87                                                                               | 0.00020 |
| STM0959         | lrp     | leucine-responsive regulatory protein                | -0.29                                                                              | 0.63973 | 0.86                                                                                | 0.01958 | -2.05                                                                               | 0.00055 |
| STM0959         | lrp     | leucine-responsive regulatory protein                | -0.49                                                                              | 0.32903 | 0.59                                                                                | 0.06483 | -0.33                                                                               | 0.39670 |
| STM0960         | ftsK    | cell division protein                                | -1.03                                                                              | 0.22155 | -0.71                                                                               | 0.02911 | -1.60                                                                               | 0.02043 |
| STM0960         | ftsK    | cell division protein                                | -0.46                                                                              | 0.69990 | -0.17                                                                               | 0.61458 | -1.38                                                                               | 0.02263 |
| STM0961         | lolA    | outer-membrane lipoprotein carrier protein precursor | -1.24                                                                              | 0.03024 | 0.31                                                                                | 0.34573 | -0.96                                                                               | 0.02077 |
| STM0961         | lolA    | outer-membrane lipoprotein carrier protein precursor | -0.99                                                                              | 0.06325 | 0.50                                                                                | 0.09663 | -0.08                                                                               | 0.87700 |
| STM0962         | ycaJ    | hypothetical protein STM0962                         | -1.36                                                                              | 0.03884 | -0.71                                                                               | 0.06866 | -1.58                                                                               | 0.02649 |
| STM0962         | ycaJ    | hypothetical protein STM0962                         | -0.63                                                                              | 0.70308 | -1.78                                                                               | 0.08891 | -2.02                                                                               | 0.04082 |
| STM0963         | serS    | seryl-tRNA synthetase                                | -1.76                                                                              | 0.01136 | -0.47                                                                               | 0.11864 | -2.35                                                                               | 0.00280 |
| STM0963         | serS    | seryl-tRNA synthetase                                | -2.15                                                                              | 0.02143 | -0.70                                                                               | 0.03503 | -1.83                                                                               | 0.07370 |
| STM0964         | dmsA    | anaerobic dimethyl sulfoxide reductase subunit A     | 0.70                                                                               | 0.48015 | -0.17                                                                               | 0.68774 | -0.50                                                                               | 0.55732 |
| STM0964         | dmsA    | anaerobic dimethyl sulfoxide reductase subunit A     | 0.92                                                                               | 0.15588 | -0.49                                                                               | 0.20295 | -0.16                                                                               | 0.81438 |
| STM0965         | dmsB    | anaerobic dimethyl sulfoxide reductase subunit B     | 2.58                                                                               | 0.03093 | 1.28                                                                                | 0.08917 | 0.70                                                                                | 0.36322 |
| STM0965         | dmsB    | anaerobic dimethyl sulfoxide reductase subunit B     | 3.54                                                                               | 0.06319 | -0.23                                                                               | 0.56064 | 2.27                                                                                | 0.00608 |
| STM0966         | dmsC    | anaerobic dimethyl sulfoxide reductase subunit C     | 0.81                                                                               | 0.17553 | 0.18                                                                                | 0.65309 | 0.72                                                                                | 0.20825 |
| STM0966         | dmsC    | anaerobic dimethyl sulfoxide reductase subunit C     | 3.89                                                                               | 0.00654 | 0.18                                                                                | 0.52033 | 2.97                                                                                | 0.00113 |
| STM0968         | ycaD    | putative MFS family transporter protein              | -0.49                                                                              | 0.38902 | -1.98                                                                               | 0.00023 | -1.23                                                                               | 0.04127 |
| STM0968         | ycaD    | putative MFS family transporter protein              | 1.20                                                                               | 0.04570 | -1.00                                                                               | 0.02011 | -0.10                                                                               | 0.87903 |
| STM0969         | ycaM    | putative amino-acid transporter                      | 2.83                                                                               | 0.01328 | -0.23                                                                               | 0.53380 | 0.26                                                                                | 0.75411 |
| STM0969         | ycaM    | putative amino-acid transporter                      | 0.69                                                                               | 0.22201 | -0.07                                                                               | 0.90341 | -0.31                                                                               | 0.54878 |
| STM0970         | pflA    | pyruvate formate lyase-activating enzyme 1           | -1.15                                                                              | 0.06013 | 0.47                                                                                | 0.14121 | -0.66                                                                               | 0.12057 |
| STM0970         | pflA    | pyruvate formate lyase-activating enzyme 1           | 0.26                                                                               | 0.59975 | 0.08                                                                                | 0.80079 | 0.41                                                                                | 0.32667 |
| STM0972         | STM0972 | SopD-like protein                                    | -0.34                                                                              | 0.50703 | 4.60                                                                                | 0.00001 | 0.92                                                                                | 0.06878 |
| STM0972         | STM0972 | SopD-like protein                                    | 0.30                                                                               | 0.56229 | 4.87                                                                                | 0.00001 | 0.80                                                                                | 0.03685 |
| STM0973         | pflB    | pyruvate formate lyase I                             | -1.76                                                                              | 0.02268 | 1.09                                                                                | 0.00432 | 0.19                                                                                | 0.73211 |
| STM0973         | pflB    | pyruvate formate lyase I                             | -0.08                                                                              | 0.91364 | 1.40                                                                                | 0.01182 | 0.20                                                                                | 0.69334 |
| STM0974         | focA    | putative formate transporter                         | -1.99                                                                              | 0.01068 | -0.13                                                                               | 0.74894 | 0.98                                                                                | 0.05334 |
| STM0974         | focA    | putative formate transporter                         | -1.37                                                                              | 0.04595 | -0.13                                                                               | 0.65882 | 0.96                                                                                | 0.02842 |
| STM0975         | ycaO    | putative cytoplasmic protein                         | -1.77                                                                              | 0.04685 | -2.23                                                                               | 0.00016 | -1.77                                                                               | 0.00109 |
| STM0975         | ycaO    | putative cytoplasmic protein                         | -1.93                                                                              | 0.01479 | -2.60                                                                               | 0.00019 | -1.37                                                                               | 0.00928 |
| STM0976         | ycaP    | putative inner membrane protein                      | -1.50                                                                              | 0.02537 | -0.48                                                                               | 0.20794 | -2.48                                                                               | 0.00416 |
| STM0976         | ycaP    | putative inner membrane protein                      | -0.75                                                                              | 0.10634 | 1.65                                                                                | 0.34632 | -1.34                                                                               | 0.02331 |
| STM0977         | serC    | phosphoserine aminotransferase                       | -2.07                                                                              | 0.01067 | -0.14                                                                               | 0.69727 | -2.64                                                                               | 0.00018 |
| STM0977         | serC    | phosphoserine aminotransferase                       | 0.39                                                                               | 0.49027 | 0.25                                                                                | 0.50209 | -2.38                                                                               | 0.00276 |
| STM0978         | aroA    | 3-phosphoshikimate 1-carboxyvinyltransferase         | -2.38                                                                              | 0.00779 | -0.78                                                                               | 0.03622 | -2.68                                                                               | 0.00195 |
| STM0978         | aroA    | 3-phosphoshikimate 1-carboxyvinyltransferase         | -0.64                                                                              | 0.17633 | -0.42                                                                               | 0.14526 | -1.79                                                                               | 0.00190 |
| STM0979         | ycaL    | putative Zn-dependent protease                       | -1.19                                                                              | 0.07276 | -0.33                                                                               | 0.43058 | 0.16                                                                                | 0.66271 |
| STM0979         | ycaL    | putative Zn-dependent protease                       | -0.74                                                                              | 0.34117 | -1.25                                                                               | 0.04554 | 0.01                                                                                | 0.98468 |
| STM0980         | cmk     | cytidylate kinase                                    | -1.78                                                                              | 0.01403 | -1.41                                                                               | 0.00170 | -1.91                                                                               | 0.00072 |
| STM0980         | cmk     | cytidylate kinase                                    | -1.67                                                                              | 0.01835 | -1.29                                                                               | 0.00459 | -1.63                                                                               | 0.00283 |
| STM0981         | rpsA    | 30S ribosomal protein S1                             | -2.42                                                                              | 0.01040 | -1.90                                                                               | 0.00036 | -3.02                                                                               | 0.00019 |
| STM0981         | rpsA    | 30S ribosomal protein S1                             | -1.84                                                                              | 0.01907 | -1.69                                                                               | 0.00129 | -3.32                                                                               | 0.00024 |
| STM0982         | himD    | integration host factor beta subunit                 | -2.76                                                                              | 0.03614 | -1.55                                                                               | 0.00309 | -0.24                                                                               | 0.51907 |
| STM0982         | himD    | integration host factor beta subunit                 | -2.58                                                                              | 0.02687 | -1.70                                                                               | 0.00260 | -0.24                                                                               | 0.51833 |
| STM0983         | ycaI    | putative recombination protein                       | -0.77                                                                              | 0.28070 | -0.02                                                                               | 0.95644 | 0.02                                                                                | 0.95577 |
| STM0983         | ycaI    | putative recombination protein                       | -2.22                                                                              | 0.04101 | -0.95                                                                               | 0.01243 | -1.02                                                                               | 0.03191 |
| STM0984         | msbA    | transport protein                                    | -3.21                                                                              | 0.01545 | -1.26                                                                               | 0.00490 | -2.11                                                                               | 0.00051 |
| STM0984         | msbA    | transport protein                                    | -1.81                                                                              | 0.01834 | -1.74                                                                               | 0.00049 | -1.50                                                                               | 0.02198 |
| STM0985         | lpxK    | tetraacyldisaccharide 4'-kinase                      | -0.75                                                                              | 0.33269 | -0.96                                                                               | 0.02432 | -1.55                                                                               | 0.00824 |
| STM0985         | lpxK    | tetraacyldisaccharide 4'-kinase                      | -0.26                                                                              | 0.56451 | -1.40                                                                               | 0.00265 | -1.98                                                                               | 0.00554 |
| STM0986         | ycaQ    | putative cytoplasmic protein                         | -0.54                                                                              | 0.38106 | -1.18                                                                               | 0.12750 | 0.92                                                                                | 0.13691 |
| STM0986         | ycaQ    | putative cytoplasmic protein                         | 0.21                                                                               | 0.76050 | -0.37                                                                               | 0.28813 | -0.58                                                                               | 0.23274 |

**Table S2.** Genome-wide expression of *Salmonella enterica* serovar Typhimurium inside fibroblasts

Intracellular WT 24 h.p.i.      Intracellular *phoP* 24 h.p.i.      Extracellular WT stationary phase

Relative to WT exponential LB      Relative to *phoP* exponential LB      Relative to WT exponential LB



| Systematic name | Gene       | Product                                          | log2Ratio (M) | p value | log2Ratio (M) | p value | log2Ratio (M) | p value |
|-----------------|------------|--------------------------------------------------|---------------|---------|---------------|---------|---------------|---------|
| STM0987         | ycaR       | putative inner membrane protein                  | 0.24          | 0.56765 | 0.32          | 0.31212 | 0.77          | 0.04252 |
| STM0987         | ycaR       | putative inner membrane protein                  | -0.22         | 0.78992 | 0.17          | 0.54325 | 0.78          | 0.05288 |
| STM0988         | kdsB       | 3-deoxy-manno-octulosonate cytidylyltransferase  | -1.18         | 0.15863 | -0.97         | 0.08212 | -0.83         | 0.15723 |
| STM0988         | kdsB       | 3-deoxy-manno-octulosonate cytidylyltransferase  | -0.29         | 0.67322 | -0.87         | 0.01166 | -1.18         | 0.01421 |
| STM0989         | STM0989    | hypothetical protein STM0989                     | 1.68          | 0.39739 | 0.44          | 0.24847 | 0.97          | 0.42473 |
| STM0989         | STM0989    | hypothetical protein STM0989                     | -0.23         | 0.71354 | -0.48         | 0.49362 | 0.91          | 0.10848 |
| STM0990         | ycbC       | putative KicA-like protein                       | -0.59         | 0.27346 | -0.29         | 0.33573 | -0.30         | 0.43224 |
| STM0990         | ycbC       | putative KicA-like protein                       | 0.33          | 0.58706 | -0.27         | 0.57978 | 0.82          | 0.07488 |
| STM0991         | smtA       | S-adenosylmethionine-dependent methyltransferase | -1.99         | 0.01731 | -0.57         | 0.06690 | -2.00         | 0.00093 |
| STM0991         | smtA       | S-adenosylmethionine-dependent methyltransferase | 0.58          | 0.38973 | -0.85         | 0.02896 | -0.85         | 0.04187 |
| STM0992         | mukF       | condesin subunit F                               | -1.85         | 0.01178 | -1.16         | 0.00357 | -1.28         | 0.00567 |
| STM0992         | mukF       | condesin subunit F                               | -2.33         | 0.00756 | -1.28         | 0.00332 | -1.56         | 0.00286 |
| STM0993         | mukE       | condesin subunit E                               | -1.37         | 0.02018 | -0.89         | 0.01056 | -1.39         | 0.01056 |
| STM0993         | mukE       | condesin subunit E                               | -0.36         | 0.45276 | -0.99         | 0.00763 | -1.25         | 0.01846 |
| STM0994         | mukB       | condesin subunit B                               | -1.94         | 0.00834 | -1.35         | 0.00562 | -2.34         | 0.00409 |
| STM0994         | mukB       | condesin subunit B                               | -0.77         | 0.56917 | -1.45         | 0.00108 | -2.09         | 0.06149 |
| STM0995         | ycbB       | putative periplasmic protein                     | -1.25         | 0.03444 | 0.18          | 0.58425 | -0.79         | 0.04065 |
| STM0995         | ycbB       | putative periplasmic protein                     | -0.99         | 0.23205 | 0.38          | 0.24643 | 0.16          | 0.72973 |
| STM0996         | ycbK       | putative outer membrane protein                  | -1.58         | 0.02776 | 0.78          | 0.03079 | -1.90         | 0.00151 |
| STM0996         | ycbK       | putative outer membrane protein                  | -1.97         | 0.01904 | 0.91          | 0.01594 | -2.59         | 0.00073 |
| STM0997         | ycbL       | putative metallo-beta-lactamase                  | -2.78         | 0.00654 | -0.24         | 0.56196 | -2.28         | 0.00038 |
| STM0997         | ycbL       | putative metallo-beta-lactamase                  | -1.81         | 0.01088 | -0.14         | 0.65511 | -2.38         | 0.00033 |
| STM0998         | aspC       | aspartate aminotransferase                       | -1.69         | 0.03222 | -0.13         | 0.73485 | -1.64         | 0.00352 |
| STM0998         | aspC       | aspartate aminotransferase                       | -0.91         | 0.21656 | 0.54          | 0.10772 | -2.12         | 0.00087 |
| STM0999         | ompF       | outer membrane protein F precursor               | -0.07         | 0.95371 | 0.94          | 0.01809 | -1.82         | 0.00176 |
| STM0999         | ompF       | outer membrane protein F precursor               | -1.01         | 0.05758 | 0.98          | 0.02304 | -1.67         | 0.01097 |
| STM1000         | asnS       | asparaginyl-tRNA synthetase                      | -2.42         | 0.00700 | -0.79         | 0.11130 | -2.56         | 0.00144 |
| STM1000         | asnS       | asparaginyl-tRNA synthetase                      | -2.39         | 0.03417 | -0.86         | 0.01085 | -2.24         | 0.00173 |
| STM1001         | STM1001    | putative leucine response regulator              | -1.62         | 0.01907 | -0.48         | 0.15736 | -0.46         | 0.28954 |
| STM1001         | STM1001    | putative leucine response regulator              | -1.37         | 0.15466 | -0.96         | 0.01575 | -0.15         | 0.90503 |
| STM1002         | STM1002    | diaminopropionate ammonia-lyase                  | 0.05          | 0.92673 | 0.09          | 0.79385 | 1.26          | 0.28389 |
| STM1002         | STM1002    | diaminopropionate ammonia-lyase                  | -1.06         | 0.09548 | -0.60         | 0.27211 | 0.53          | 0.42861 |
| STM1003         | STM1003    | putative transcriptional regulator               | -1.05         | 0.04734 | -0.32         | 0.42219 | 0.20          | 0.59774 |
| STM1003         | STM1003    | putative transcriptional regulator               | 0.05          | 0.96378 | 0.25          | 0.68767 | -0.44         | 0.35361 |
| STM1004         | pncB       | nicotinate phosphoribosyltransferase             | -0.45         | 0.41404 | -0.48         | 0.23315 | -0.08         | 0.91050 |
| STM1004         | pncB       | nicotinate phosphoribosyltransferase             | -0.70         | 0.14348 | -0.38         | 0.21235 | -0.96         | 0.03902 |
| STM1005         | STM1005    | integrase                                        | -0.72         | 0.57095 | -0.05         | 0.89061 | -0.74         | 0.23733 |
| STM1005         | STM1005    | integrase                                        | 0.33          | 0.66546 | 0.01          | 0.98614 | 0.14          | 0.76739 |
| STM1006         | STM1006    | excisionase                                      | 2.32          | 0.01523 | 0.77          | 0.05032 | 2.89          | 0.00578 |
| STM1006         | STM1006    | excisionase                                      | 2.80          | 0.00547 | -0.09         | 0.77180 | 3.52          | 0.00008 |
| STM1008,S       | STM1008,S  | hypothetical protein STM1008,S                   | 1.01          | 0.08068 | 2.03          | 0.00077 | 1.34          | 0.04741 |
| STM1008,S       | STM1008,S  | hypothetical protein STM1008,S                   | 1.17          | 0.39210 | -0.23         | 0.58112 | 1.28          | 0.28070 |
| STM1008,S       | STM1008,S  | hypothetical protein STM1008,S                   | 1.78          | 0.19671 | 0.69          | 0.04457 | 1.32          | 0.04691 |
| STM1008,S       | STM1008,S  | hypothetical protein STM1008,S                   | 3.16          | 0.02945 | -0.94         | 0.04712 | 2.09          | 0.00525 |
| STM1010,1n      | STM1010,1n | hypothetical protein STM1010,1n                  | 1.77          | 0.03932 | 0.43          | 0.15021 | 1.07          | 0.22560 |
| STM1010,1n      | STM1010,1n | hypothetical protein STM1010,1n                  | 2.69          | 0.00595 | 0.19          | 0.64154 | 2.99          | 0.00032 |
| STM1020         | STM1020    | hypothetical protein STM1020                     | 0.04          | 0.94225 | 0.10          | 0.87638 | -0.71         | 0.16824 |
| STM1020         | STM1020    | hypothetical protein STM1020                     | 2.61          | 0.04979 | 0.33          | 0.32740 | -0.11         | 0.84981 |
| STM1020         | STM1020    | hypothetical protein STM1020                     | 2.26          | 0.05213 | 0.84          | 0.01693 | 0.11          | 0.77409 |
| STM1020         | STM1020    | hypothetical protein STM1020                     | 3.14          | 0.02573 | 0.54          | 0.09359 | 0.32          | 0.63268 |
| STM1021         | STM1021    | hypothetical protein STM1021                     | 2.39          | 0.10387 | 0.99          | 0.00958 | 0.34          | 0.62353 |
| STM1021         | STM1021    | hypothetical protein STM1021                     | 3.05          | 0.03475 | 0.47          | 0.20679 | 0.86          | 0.06169 |
| STM1022         | STM1022    | putative molecular chaperone                     | 0.94          | 0.35906 | -0.01         | 0.98033 | 0.11          | 0.86032 |
| STM1022         | STM1022    | putative molecular chaperone                     | 1.90          | 0.01951 | -0.89         | 0.06624 | 0.62          | 0.34398 |
| STM1028         | STM1028    | lysozyme                                         | 1.43          | 0.23505 | 0.43          | 0.27473 | -0.26         | 0.56271 |
| STM1028         | STM1028    | lysozyme                                         | 1.31          | 0.05496 | -0.23         | 0.57507 | -0.01         | 0.97446 |
| STM1029         | STM1029    | hypothetical protein STM1029                     | 1.00          | 0.14077 | -0.26         | 0.37081 | 0.63          | 0.11004 |
| STM1029         | STM1029    | hypothetical protein STM1029                     | 2.30          | 0.01358 | -0.98         | 0.14886 | 0.89          | 0.39842 |
| STM1030         | STM1030    | hypothetical protein STM1030                     | 0.71          | 0.15783 | -0.64         | 0.15109 | 0.20          | 0.82339 |
| STM1030         | STM1030    | hypothetical protein STM1030                     | 1.75          | 0.07536 | -0.96         | 0.01966 | 3.26          | 0.00147 |
| STM1031         | STM1031    | hypothetical protein STM1031                     | 1.68          | 0.03459 | 0.39          | 0.20227 | 1.42          | 0.01325 |
| STM1031         | STM1031    | hypothetical protein STM1031                     | 2.49          | 0.04599 | -0.30         | 0.77038 | 2.72          | 0.00038 |
| STM1032         | STM1032    | hypothetical protein STM1032                     | 0.49          | 0.62241 | -0.81         | 0.09602 | -0.75         | 0.38617 |
| STM1032         | STM1032    | hypothetical protein STM1032                     | -0.20         | 0.89893 | -2.59         | 0.02338 | -0.63         | 0.35901 |
| STM1033         | STM1033    | Clp protease-like protein                        | -0.45         | 0.53746 | 1.21          | 0.00261 | 0.58          | 0.40881 |
| STM1033         | STM1033    | Clp protease-like protein                        | 0.53          | 0.40414 | -0.12         | 0.77686 | 0.67          | 0.17113 |
| STM1034         | STM1034    | putative RecA/RadA recombinase                   | 1.15          | 0.05709 | -0.51         | 0.24589 | -1.06         | 0.08306 |
| STM1034         | STM1034    | putative RecA/RadA recombinase                   | 2.39          | 0.00661 | -0.35         | 0.22068 | 0.53          | 0.20425 |
| STM1035         | STM1035    | ATP-binding sugar transporter-like protein       | -0.22         | 0.70138 | 0.83          | 0.03970 | 0.00          | 0.99462 |
| STM1035         | STM1035    | ATP-binding sugar transporter-like protein       | -0.50         | 0.55440 | -0.12         | 0.79056 | -0.02         | 0.96217 |

**Table S2.** Genome-wide expression of *Salmonella enterica* serovar Typhimurium inside fibroblasts

Intracellular WT 24 h p.i.      Intracellular *phoP* 24 h p.i.      Extracellular WT stationary phase

Relative to WT exponential LB      Relative to *phoP* exponential LB      Relative to WT exponential LB



| Systematic name | Gene    | Product                                           | log2Ratio (M) | p value | log2Ratio (M) | p value | log2Ratio (M) | p value |
|-----------------|---------|---------------------------------------------------|---------------|---------|---------------|---------|---------------|---------|
| STM1036         | STM1036 | probable minor tail protein                       | 0.83          | 0.10291 | 0.40          | 0.26730 | 0.96          | 0.10728 |
| STM1036         | STM1036 | probable minor tail protein                       | -0.27         | 0.67290 | 0.44          | 0.24706 | 0.77          | 0.24726 |
| STM1037         | STM1037 | probable minor tail protein                       | 1.36          | 0.04983 | 0.67          | 0.17518 | 1.37          | 0.02046 |
| STM1037         | STM1037 | probable minor tail protein                       | 3.75          | 0.00541 | 0.35          | 0.47402 | 2.91          | 0.00839 |
| STM1038         | STM1038 | probable major tail protein                       | 1.94          | 0.05381 | -2.00         | 0.00309 | 1.44          | 0.09427 |
| STM1038         | STM1038 | probable major tail protein                       | 1.57          | 0.05745 | -2.55         | 0.00239 | 2.32          | 0.03175 |
| STM1039         | STM1039 | probable minor tail protein                       | -0.43         | 0.54972 | 0.48          | 0.31136 | 0.61          | 0.29567 |
| STM1039         | STM1039 | probable minor tail protein                       | 0.71          | 0.30245 | 0.13          | 0.78057 | 0.98          | 0.12787 |
| STM1040         | STM1040 | probable minor tail protein                       | 0.48          | 0.46629 | 0.63          | 0.15275 | 1.56          | 0.02816 |
| STM1040         | STM1040 | probable minor tail protein                       | 1.61          | 0.03088 | 0.59          | 0.07875 | 1.18          | 0.03849 |
| STM1041         | STM1041 | probable minor tail protein                       | 2.23          | 0.05171 | 0.24          | 0.61370 | -0.28         | 0.73581 |
| STM1041         | STM1041 | probable minor tail protein                       | 2.25          | 0.06648 | -1.67         | 0.00153 | -0.27         | 0.63823 |
| STM1042         | STM1042 | probable minor tail protein                       | -0.08         | 0.92997 | 0.64          | 0.10474 | 1.86          | 0.00276 |
| STM1042         | STM1042 | probable minor tail protein                       | 1.58          | 0.02667 | 0.85          | 0.05917 | 1.23          | 0.02158 |
| STM1043         | STM1043 | attachment/invasion protein                       | 0.48          | 0.40136 | 0.72          | 0.07379 | 0.05          | 0.92946 |
| STM1043         | STM1043 | attachment/invasion protein                       | 0.38          | 0.49079 | -0.16         | 0.71883 | -0.94         | 0.38020 |
| STM1044         | sodC    | superoxide dismutase precursor                    | 0.49          | 0.29112 | 0.78          | 0.21507 | -0.45         | 0.21078 |
| STM1044         | sodC    | superoxide dismutase precursor                    | 2.02          | 0.00949 | 0.15          | 0.66674 | -0.19         | 0.61705 |
| STM1045         | STM1045 | probable minor tail protein                       | -0.20         | 0.72806 | -2.33         | 0.00080 | -1.62         | 0.01906 |
| STM1045         | STM1045 | probable minor tail protein                       | 0.83          | 0.22544 | -1.97         | 0.00223 | 0.51          | 0.39032 |
| STM1046         | STM1046 | probable tail assembly protein                    | 1.30          | 0.05709 | 1.06          | 0.00690 | 0.68          | 0.11238 |
| STM1046         | STM1046 | probable tail assembly protein                    | 1.20          | 0.13484 | 0.66          | 0.09387 | 0.82          | 0.11068 |
| STM1047         | STM1047 | probable tail assembly protein                    | 1.98          | 0.03256 | -0.99         | 0.01741 | 0.39          | 0.53590 |
| STM1047         | STM1047 | probable tail assembly protein                    | 2.32          | 0.01828 | -1.24         | 0.05608 | 0.98          | 0.05608 |
| STM1048         | STM1048 | host specificity protein J                        | 2.67          | 0.01336 | 0.91          | 0.01701 | 2.69          | 0.00040 |
| STM1048         | STM1048 | host specificity protein J                        | 2.15          | 0.36871 | -0.28         | 0.74644 | 1.78          | 0.00605 |
| STM1049         | STM1049 | probable tail fiber protein                       | 2.22          | 0.01090 | 2.44          | 0.00021 | 2.17          | 0.00161 |
| STM1049         | STM1049 | probable tail fiber protein                       | 3.44          | 0.00537 | 1.42          | 0.00489 | 2.49          | 0.00096 |
| STM1050         | STM1050 | tail fiber assembly like-protein                  | 1.51          | 0.09165 | 1.63          | 0.00070 | 1.13          | 0.03757 |
| STM1050         | STM1050 | tail fiber assembly like-protein                  | 1.79          | 0.04439 | 1.13          | 0.02359 | 0.28          | 0.59655 |
| STM1051         | ssel    | secreted effector protein                         | 0.91          | 0.34711 | 5.43          | 0.00001 | 2.24          | 0.01053 |
| STM1051         | ssel    | secreted effector protein                         | 0.08          | 0.90746 | 5.94          | 0.00001 | 1.69          | 0.01123 |
| STM1053         | STM1053 | hypothetical protein STM1053                      | 0.32          | 0.62331 | 2.69          | 0.00011 | 0.29          | 0.57912 |
| STM1053         | STM1053 | hypothetical protein STM1053                      | 2.70          | 0.01417 | 2.47          | 0.00071 | 1.12          | 0.09489 |
| STM1055         | STM1055 | hypothetical protein STM1055                      | -0.74         | 0.22682 | 0.92          | 0.04497 | -0.54         | 0.23566 |
| STM1055         | STM1055 | hypothetical protein STM1055                      | 3.25          | 0.00613 | 1.70          | 0.00697 | 1.31          | 0.01671 |
| STM1056         | STM1056 | MsgA-like protein                                 | 0.39          | 0.51000 | 1.10          | 0.04569 | 1.54          | 0.04737 |
| STM1056         | STM1056 | MsgA-like protein                                 | 1.99          | 0.02573 | 0.79          | 0.05114 | 1.77          | 0.02582 |
| STM1057         | pepN    | aminopeptidase N                                  | 1.56          | 0.02456 | -0.29         | 0.33010 | -0.86         | 0.18695 |
| STM1057         | pepN    | aminopeptidase N                                  | 1.48          | 0.04046 | 0.55          | 0.16069 | 0.14          | 0.79186 |
| STM1058         | pyrD    | dihydroorotate dehydrogenase                      | -0.37         | 0.39909 | -0.76         | 0.09120 | -0.90         | 0.13937 |
| STM1058         | pyrD    | dihydroorotate dehydrogenase                      | 1.42          | 0.07190 | 0.59          | 0.29639 | 1.26          | 0.01056 |
| STM1059         | ycbW    | putative cytoplasmic protein                      | -0.29         | 0.63074 | 1.04          | 0.01462 | -0.60         | 0.20557 |
| STM1059         | ycbW    | putative cytoplasmic protein                      | 0.98          | 0.05371 | 1.39          | 0.02453 | 0.53          | 0.31467 |
| STM1060         | STM1060 | putative iron-sulfur protein                      | 1.48          | 0.07067 | 1.24          | 0.00303 | 0.04          | 0.93346 |
| STM1060         | STM1060 | putative iron-sulfur protein                      | 3.09          | 0.00750 | 1.49          | 0.00345 | 1.76          | 0.02199 |
| STM1061         | ycbY    | putative N6-adenine-specific DNA methylase        | -0.16         | 0.88453 | -1.55         | 0.00320 | -1.78         | 0.03680 |
| STM1061         | ycbY    | putative N6-adenine-specific DNA methylase        | 0.03          | 0.97778 | -0.88         | 0.02382 | -1.86         | 0.00423 |
| STM1062         | uup     | putative ABC transporter ATPase component         | 0.42          | 0.51519 | -0.47         | 0.10824 | 0.20          | 0.76035 |
| STM1062         | uup     | putative ABC transporter ATPase component         | 1.54          | 0.02522 | -0.94         | 0.02883 | -0.10         | 0.80345 |
| STM1063         | pqiA    | paraquat-inducible protein A                      | -1.35         | 0.02743 | -0.53         | 0.13102 | -0.60         | 0.11243 |
| STM1063         | pqiA    | paraquat-inducible protein A                      | -0.75         | 0.20530 | -0.69         | 0.04263 | -0.72         | 0.11017 |
| STM1064         | pqiB    | paraquat-inducible protein B                      | 0.82          | 0.12321 | -0.06         | 0.86785 | 1.57          | 0.01795 |
| STM1064         | pqiB    | paraquat-inducible protein B                      | 2.05          | 0.00889 | -0.15         | 0.65080 | 2.45          | 0.00035 |
| STM1065         | ymbA    | putative outer membrane protein                   | -0.70         | 0.30866 | -0.19         | 0.57542 | 0.37          | 0.32772 |
| STM1065         | ymbA    | putative outer membrane protein                   | 0.12          | 0.77992 | -0.28         | 0.42544 | 0.54          | 0.47861 |
| STM1067         | fabA    | 3-hydroxydecanoyl-ACP dehydratase                 | -1.88         | 0.01356 | -1.53         | 0.00130 | -2.23         | 0.00156 |
| STM1067         | fabA    | 3-hydroxydecanoyl-ACP dehydratase                 | -1.15         | 0.10780 | -1.53         | 0.00185 | -1.75         | 0.00116 |
| STM1068         | lonH    | putative protease                                 | -2.57         | 0.00654 | -1.25         | 0.01495 | -2.40         | 0.00059 |
| STM1068         | lonH    | putative protease                                 | -1.11         | 0.05758 | -1.66         | 0.00083 | -2.33         | 0.00246 |
| STM1069         | ycbG    | hypothetical protein STM1069                      | -1.37         | 0.05401 | 0.39          | 0.36780 | -0.51         | 0.17957 |
| STM1069         | ycbG    | hypothetical protein STM1069                      | -1.30         | 0.11699 | 0.26          | 0.53334 | -0.16         | 0.68022 |
| STM1070         | ompA    | putative hydrogenase membrane component precursor | -3.70         | 0.01199 | 0.45          | 0.34003 | -0.68         | 0.07463 |
| STM1070         | ompA    | putative hydrogenase membrane component precursor | -3.83         | 0.01016 | 0.21          | 0.46168 | -1.71         | 0.00782 |
| STM1071         | sulA    | cell division inhibitor                           | -3.52         | 0.00719 | -0.52         | 0.28212 | -0.91         | 0.07260 |
| STM1071         | sulA    | cell division inhibitor                           | -2.36         | 0.04973 | -0.19         | 0.72335 | -1.32         | 0.03937 |
| STM1074         | yccF    | putative inner membrane protein                   | -1.10         | 0.04932 | -0.90         | 0.06835 | -1.07         | 0.01239 |
| STM1074         | yccF    | putative inner membrane protein                   | -0.15         | 0.75631 | -0.87         | 0.01545 | -0.48         | 0.28567 |
| STM1075         | helD    | DNA helicase IV                                   | -0.93         | 0.23375 | -0.04         | 0.91467 | -0.43         | 0.57586 |
| STM1075         | helD    | DNA helicase IV                                   | 0.57          | 0.28808 | -0.40         | 0.24801 | -0.63         | 0.22723 |

**Table S2.** Genome-wide expression of *Salmonella enterica* serovar Typhimurium inside fibroblasts

Intracellular WT 24 h p.i.      Intracellular *phoP* 24 h p.i.      Extracellular WT stationary phase

Relative to WT exponential LB      Relative to *phoP* exponential LB      Relative to WT exponential LB



| Systematic name | Gene    | Product                                     | log2Ratio (M) | p value | log2Ratio (M) | p value | log2Ratio (M) | p value |
|-----------------|---------|---------------------------------------------|---------------|---------|---------------|---------|---------------|---------|
| STM1076         | mgsA    | methylglyoxal synthase                      | -1.02         | 0.06349 | 0.02          | 0.96273 | -0.57         | 0.17778 |
| STM1076         | mgsA    | methylglyoxal synthase                      | -0.12         | 0.81326 | 0.16          | 0.63793 | 0.64          | 0.24662 |
| STM1077         | yccT    | hypothetical protein STM1077                | -0.15         | 0.83294 | 0.17          | 0.68305 | 0.19          | 0.65706 |
| STM1077         | yccT    | hypothetical protein STM1077                | 0.34          | 0.53583 | -0.65         | 0.09740 | 0.17          | 0.69970 |
| STM1078         | STM1078 | putative cytoplasmic protein                | 0.89          | 0.54370 | 2.10          | 0.00080 | 1.24          | 0.07108 |
| STM1078         | STM1078 | putative cytoplasmic protein                | 1.16          | 0.38527 | 2.27          | 0.00013 | 1.70          | 0.00638 |
| STM1079         | yccV    | putative inner membrane protein             | -0.84         | 0.10506 | -0.06         | 0.90452 | 0.46          | 0.26108 |
| STM1079         | yccV    | putative inner membrane protein             | -0.79         | 0.25538 | -0.05         | 0.89653 | 1.60          | 0.01106 |
| STM1080         | yccW    | putative SAM-dependent methyltransferase    | -0.52         | 0.39937 | -0.78         | 0.02864 | 0.57          | 0.36524 |
| STM1080         | yccW    | putative SAM-dependent methyltransferase    | -2.33         | 0.01549 | -0.65         | 0.03673 | 0.12          | 0.80093 |
| STM1081         | STM1081 | putative outer membrane protein             | -1.17         | 0.06140 | 0.39          | 0.16357 | -0.89         | 0.20543 |
| STM1081         | STM1081 | putative outer membrane protein             | 0.57          | 0.34818 | 0.44          | 0.17817 | -0.19         | 0.73468 |
| STM1082         | STM1082 | bacterial regulatory protein                | -0.67         | 0.25908 | 0.50          | 0.09704 | 0.26          | 0.52138 |
| STM1082         | STM1082 | bacterial regulatory protein                | 1.52          | 0.22243 | 0.66          | 0.07854 | 1.82          | 0.00476 |
| STM1083         | yccX    | putative phosphohydrolase                   | -0.31         | 0.46038 | 1.06          | 0.01128 | 0.65          | 0.09217 |
| STM1083         | yccX    | putative phosphohydrolase                   | 0.22          | 0.74697 | 0.85          | 0.03451 | 0.86          | 0.07286 |
| STM1084         | yccK    | putative sulfite reductase gamma subunit    | 0.25          | 0.59869 | 1.05          | 0.00764 | 1.05          | 0.01843 |
| STM1084         | yccK    | putative sulfite reductase gamma subunit    | 2.00          | 0.05709 | 0.41          | 0.32326 | 1.38          | 0.02615 |
| STM1085         | yccA    | putative transport protein                  | 0.27          | 0.65886 | 1.78          | 0.00075 | 2.28          | 0.00035 |
| STM1085         | yccA    | putative transport protein                  | 0.16          | 0.75467 | 2.05          | 0.00093 | 2.65          | 0.00058 |
| STM1086         | serT    | STM1086                                     | -2.30         | 0.02539 | -0.76         | 0.19079 | 3.08          | 0.00022 |
| STM1086         | serT    | STM1086                                     | -1.11         | 0.06801 | -0.60         | 0.30007 | 3.45          | 0.00027 |
| STM1087         | pipA    | pathogenicity island-encoded protein A      | 0.09          | 0.87200 | 3.44          | 0.00002 | 1.34          | 0.23820 |
| STM1087         | pipA    | pathogenicity island-encoded protein A      | 0.75          | 0.09424 | 3.33          | 0.00008 | 1.27          | 0.00518 |
| STM1088         | pipB    | secreted effector protein                   | 2.57          | 0.03083 | 8.57          | 0.00000 | 0.09          | 0.91584 |
| STM1088         | pipB    | secreted effector protein                   | 2.24          | 0.01261 | 8.12          | 0.00000 | 1.40          | 0.04351 |
| STM1090         | pipC    | pathogenicity island-encoded protein C      | -0.79         | 0.13459 | -0.22         | 0.64548 | -1.12         | 0.01825 |
| STM1090         | pipC    | pathogenicity island-encoded protein C      | -0.62         | 0.20028 | 0.17          | 0.77831 | -0.39         | 0.35208 |
| STM1091         | sopB    | secreted effector protein                   | 2.50          | 0.01203 | -0.62         | 0.06909 | -0.76         | 0.30334 |
| STM1091         | sopB    | secreted effector protein                   | 2.79          | 0.01259 | -0.88         | 0.03320 | 0.88          | 0.23384 |
| STM1094         | pipD    | pathogenicity island-encoded protein D      | 0.20          | 0.76061 | -0.27         | 0.66213 | -0.05         | 0.93387 |
| STM1094         | pipD    | pathogenicity island-encoded protein D      | 2.06          | 0.03925 | -0.77         | 0.03280 | 0.87          | 0.09667 |
| STM1095         | copS    | copper resistance protein                   | -0.28         | 0.55865 | -0.08         | 0.87599 | 0.49          | 0.38566 |
| STM1095         | copS    | copper resistance protein                   | 1.00          | 0.05673 | -0.42         | 0.29975 | 0.06          | 0.90497 |
| STM1096         | copR    | copper resistance protein                   | 0.41          | 0.34481 | 0.76          | 0.04364 | 0.74          | 0.24491 |
| STM1096         | copR    | copper resistance protein                   | 1.63          | 0.02003 | 0.73          | 0.07612 | 1.13          | 0.02622 |
| STM1097         | STM1097 | hypothetical protein STM1097                | -0.51         | 0.30019 | 1.15          | 0.01220 | 0.62          | 0.20558 |
| STM1097         | STM1097 | hypothetical protein STM1097                | 0.84          | 0.28373 | 2.09          | 0.00028 | 2.61          | 0.00674 |
| STM1098         | hpaC    | 4-hydroxyphenylacetate catabolism           | 0.12          | 0.84287 | 1.34          | 0.00410 | -0.46         | 0.53047 |
| STM1098         | hpaC    | 4-hydroxyphenylacetate catabolism           | 1.30          | 0.22802 | 1.82          | 0.00203 | -1.13         | 0.01986 |
| STM1099         | hpaB    | 4-hydroxyphenylacetate catabolism           | -0.39         | 0.50635 | -0.56         | 0.11596 | -0.60         | 0.44829 |
| STM1099         | hpaB    | 4-hydroxyphenylacetate catabolism           | 1.09          | 0.05741 | -0.39         | 0.34589 | 1.14          | 0.05508 |
| STM1100         | hpaR    | 4-hydroxyphenylacetate catabolism           | -0.80         | 0.64009 | -0.32         | 0.50209 | 0.91          | 0.04020 |
| STM1100         | hpaR    | 4-hydroxyphenylacetate catabolism           | 1.91          | 0.02573 | 0.19          | 0.83889 | 0.46          | 0.50489 |
| STM1101         | hpaG    | 4-hydroxyphenylacetate catabolism           | 0.26          | 0.68566 | 1.14          | 0.00361 | 0.59          | 0.25088 |
| STM1101         | hpaG    | 4-hydroxyphenylacetate catabolism           | 1.07          | 0.04923 | 0.85          | 0.07806 | 1.78          | 0.00589 |
| STM1102         | hpaE    | 4-hydroxyphenylacetate catabolism           | -0.37         | 0.55997 | 0.02          | 0.97103 | -0.62         | 0.29269 |
| STM1102         | hpaE    | 4-hydroxyphenylacetate catabolism           | 0.16          | 0.79084 | 0.91          | 0.26310 | 0.25          | 0.70417 |
| STM1103         | hpaD    | 4-hydroxyphenylacetate catabolism           | -0.72         | 0.39423 | 0.25          | 0.39310 | 0.42          | 0.52111 |
| STM1103         | hpaD    | 4-hydroxyphenylacetate catabolism           | -0.32         | 0.61184 | -1.24         | 0.03058 | 0.20          | 0.68805 |
| STM1104         | hpaF    | 4-hydroxyphenylacetate catabolism           | 0.05          | 0.95350 | 1.23          | 0.01167 | 0.44          | 0.43336 |
| STM1104         | hpaF    | 4-hydroxyphenylacetate catabolism           | 1.48          | 0.34196 | -0.32         | 0.53262 | 1.00          | 0.04600 |
| STM1105         | hpaH    | 4-hydroxyphenylacetate catabolism           | 0.43          | 0.39007 | -1.03         | 0.04721 | -0.32         | 0.63670 |
| STM1105         | hpaH    | 4-hydroxyphenylacetate catabolism           | 0.98          | 0.23189 | -1.02         | 0.06084 | 1.38          | 0.07806 |
| STM1106         | hpaI    | 4-hydroxyphenylacetate catabolism           | -0.71         | 0.31214 | -0.56         | 0.23287 | -0.01         | 0.98546 |
| STM1106         | hpaI    | 4-hydroxyphenylacetate catabolism           | 0.27          | 0.59869 | -0.53         | 0.38496 | 0.28          | 0.55218 |
| STM1107         | hpaX    | 4-hydroxyphenylacetate catabolism           | -0.39         | 0.56239 | -0.45         | 0.34067 | -0.34         | 0.53850 |
| STM1107         | hpaX    | 4-hydroxyphenylacetate catabolism           | 1.07          | 0.21050 | -0.23         | 0.54128 | 0.11          | 0.80608 |
| STM1108         | hpaA    | 4-hydroxyphenylacetate catabolism           | -0.27         | 0.58841 | -2.17         | 0.08685 | 0.79          | 0.35901 |
| STM1108         | hpaA    | 4-hydroxyphenylacetate catabolism           | 0.02          | 0.98561 | -0.90         | 0.06234 | -1.56         | 0.14367 |
| STM1109         | STM1109 | putative periplasmic protein                | 0.28          | 0.51100 | 0.22          | 0.47069 | 0.31          | 0.43806 |
| STM1109         | STM1109 | putative periplasmic protein                | 0.65          | 0.55212 | -0.79         | 0.11551 | 1.58          | 0.05159 |
| STM1111         | yccD    | putative cytoplasmic protein                | -1.09         | 0.04414 | 0.44          | 0.34768 | 0.24          | 0.50461 |
| STM1111         | yccD    | putative cytoplasmic protein                | -0.66         | 0.16721 | 0.44          | 0.32362 | 0.88          | 0.06994 |
| STM1112         | cbpA    | DNA-binding protein                         | -1.31         | 0.06965 | 0.32          | 0.33227 | 0.37          | 0.32940 |
| STM1112         | cbpA    | DNA-binding protein                         | -0.62         | 0.14918 | 0.61          | 0.11281 | 0.64          | 0.14035 |
| STM1113         | scsA    | suppression of copper sensitivity protein A | -0.23         | 0.68827 | 1.13          | 0.10812 | -0.48         | 0.20564 |
| STM1113         | scsA    | suppression of copper sensitivity protein A | 0.49          | 0.29994 | 0.37          | 0.49730 | 0.21          | 0.68841 |
| STM1114         | scsB    | suppression of copper sensitivity protein   | -0.10         | 0.88088 | 1.03          | 0.03827 | 0.67          | 0.32261 |
| STM1114         | scsB    | suppression of copper sensitivity protein   | 0.75          | 0.45900 | 0.42          | 0.29544 | 0.69          | 0.27345 |

**Table S2.** Genome-wide expression of *Salmonella enterica* serovar Typhimurium inside fibroblasts

|                 |         |                                                 | Intracellular WT<br>24 h p.i.                                                      |         | Intracellular <i>phoP</i><br>24 h p.i.                                              |         | Extracellular WT<br>stationary phase                                                |         |
|-----------------|---------|-------------------------------------------------|------------------------------------------------------------------------------------|---------|-------------------------------------------------------------------------------------|---------|-------------------------------------------------------------------------------------|---------|
|                 |         |                                                 | Relative to WT<br>exponential LB                                                   |         | Relative to <i>phoP</i><br>exponential LB                                           |         | Relative to WT<br>exponential LB                                                    |         |
|                 |         |                                                 |  |         |  |         |  |         |
| Systematic name | Gene    | Product                                         | log2Ratio (M)                                                                      | p value | log2Ratio (M)                                                                       | p value | log2Ratio (M)                                                                       | p value |
| STM1115         | scsC    | suppression of copper sensitivity protein       | 1.35                                                                               | 0.04372 | 1.49                                                                                | 0.00847 | 0.96                                                                                | 0.03722 |
| STM1115         | scsC    | suppression of copper sensitivity protein       | 3.36                                                                               | 0.08514 | 1.27                                                                                | 0.00574 | 2.14                                                                                | 0.00079 |
| STM1116         | scsD    | suppression of copper sensitivity protein       | -0.46                                                                              | 0.45507 | -0.25                                                                               | 0.39277 | -0.17                                                                               | 0.80945 |
| STM1116         | scsD    | suppression of copper sensitivity protein       | 1.25                                                                               | 0.07399 | 0.24                                                                                | 0.42172 | 0.61                                                                                | 0.18295 |
| STM1117         | agp     | glucose-1-phosphatase                           | -0.11                                                                              | 0.78992 | 3.22                                                                                | 0.00007 | 2.63                                                                                | 0.00025 |
| STM1117         | agp     | glucose-1-phosphatase                           | 0.42                                                                               | 0.33525 | 3.59                                                                                | 0.00002 | 3.31                                                                                | 0.00019 |
| STM1118         | yccJ    | putative cytoplasmic protein                    | 1.20                                                                               | 0.05800 | 2.28                                                                                | 0.00047 | 4.09                                                                                | 0.00022 |
| STM1118         | yccJ    | putative cytoplasmic protein                    | 1.73                                                                               | 0.02442 | 2.28                                                                                | 0.00049 | 5.31                                                                                | 0.00002 |
| STM1119         | wraB    | TrpR binding protein WrbA                       | 0.42                                                                               | 0.50162 | 3.12                                                                                | 0.00006 | 5.47                                                                                | 0.00002 |
| STM1119         | wraB    | TrpR binding protein WrbA                       | 1.28                                                                               | 0.07428 | 3.21                                                                                | 0.00015 | 5.39                                                                                | 0.00020 |
| STM1121         | ymdF    | putative cytoplasmic protein                    | 0.86                                                                               | 0.12381 | 2.60                                                                                | 0.00012 | 7.21                                                                                | 0.00002 |
| STM1121         | ymdF    | putative cytoplasmic protein                    | 2.48                                                                               | 0.00635 | 2.69                                                                                | 0.00010 | 8.99                                                                                | 0.00001 |
| STM1122         | ydcC    | putative transcriptional repressor              | -0.87                                                                              | 0.20836 | 0.47                                                                                | 0.15006 | 1.15                                                                                | 0.00929 |
| STM1122         | ydcC    | putative transcriptional repressor              | -0.17                                                                              | 0.77174 | 0.29                                                                                | 0.36153 | 1.37                                                                                | 0.00468 |
| STM1123         | STM1123 | putative periplasmic protein                    | -0.64                                                                              | 0.57394 | -2.81                                                                               | 0.00041 | -0.73                                                                               | 0.18895 |
| STM1123         | STM1123 | putative periplasmic protein                    | -0.15                                                                              | 0.89576 | -2.46                                                                               | 0.00070 | -0.87                                                                               | 0.28474 |
| STM1125         | putP    | major sodium/proline symporter                  | 0.36                                                                               | 0.44366 | 0.28                                                                                | 0.48330 | -0.87                                                                               | 0.03999 |
| STM1125         | putP    | major sodium/proline symporter                  | 0.26                                                                               | 0.53359 | 0.19                                                                                | 0.57025 | -0.82                                                                               | 0.07171 |
| STM1127         | STM1127 | putative transcriptional regulator              | -0.66                                                                              | 0.25920 | 0.29                                                                                | 0.42507 | 0.47                                                                                | 0.19850 |
| STM1127         | STM1127 | putative transcriptional regulator              | -0.14                                                                              | 0.78220 | -0.44                                                                               | 0.22185 | 0.58                                                                                | 0.18304 |
| STM1128         | STM1128 | putative sodium/glucose cotransporter           | -1.27                                                                              | 0.04747 | -0.67                                                                               | 0.06637 | -0.97                                                                               | 0.06294 |
| STM1128         | STM1128 | putative sodium/glucose cotransporter           | 0.56                                                                               | 0.58028 | -0.45                                                                               | 0.28692 | -0.47                                                                               | 0.35902 |
| STM1129         | STM1129 | putative inner membrane protein                 | -0.08                                                                              | 0.89999 | 0.96                                                                                | 0.50789 | -0.16                                                                               | 0.70360 |
| STM1129         | STM1129 | putative inner membrane protein                 | -0.45                                                                              | 0.41542 | -0.05                                                                               | 0.94003 | -2.49                                                                               | 0.01908 |
| STM1130         | STM1130 | putative inner membrane protein                 | -0.05                                                                              | 0.94606 | 0.82                                                                                | 0.18809 | 1.23                                                                                | 0.10272 |
| STM1130         | STM1130 | putative inner membrane protein                 | 0.35                                                                               | 0.65239 | -0.31                                                                               | 0.61540 | -0.47                                                                               | 0.66789 |
| STM1131         | STM1131 | putative outer membrane protein                 | 0.13                                                                               | 0.78367 | 0.25                                                                                | 0.47216 | 1.24                                                                                | 0.01677 |
| STM1131         | STM1131 | putative outer membrane protein                 | 0.91                                                                               | 0.16859 | 0.28                                                                                | 0.53131 | 1.54                                                                                | 0.01179 |
| STM1132         | STM1132 | putative sialic acid transporter                | -0.93                                                                              | 0.06515 | -0.35                                                                               | 0.50013 | -0.22                                                                               | 0.55781 |
| STM1132         | STM1132 | putative sialic acid transporter                | -0.77                                                                              | 0.12640 | 0.33                                                                                | 0.34076 | 0.51                                                                                | 0.40701 |
| STM1133         | STM1133 | putative dehydrogenase                          | -1.44                                                                              | 0.02262 | 0.45                                                                                | 0.13935 | 0.41                                                                                | 0.39322 |
| STM1133         | STM1133 | putative dehydrogenase                          | 0.04                                                                               | 0.96242 | 1.26                                                                                | 0.00419 | 1.23                                                                                | 0.01159 |
| STM1134         | serX    | STM1134                                         | 0.90                                                                               | 0.14620 | -1.29                                                                               | 0.00514 | 2.15                                                                                | 0.00093 |
| STM1134         | serX    | STM1134                                         | 1.64                                                                               | 0.03289 | -1.01                                                                               | 0.02681 | 2.57                                                                                | 0.00055 |
| STM1135         | ydcW    | putative oxidoreductase                         | 0.28                                                                               | 0.51096 | -0.68                                                                               | 0.07251 | -0.95                                                                               | 0.07011 |
| STM1135         | ydcW    | putative oxidoreductase                         | 1.42                                                                               | 0.02573 | -0.40                                                                               | 0.16189 | 0.19                                                                                | 0.75669 |
| STM1136         | ydcX    | hypothetical protein STM1136                    | -1.85                                                                              | 0.00991 | -0.82                                                                               | 0.01998 | -0.93                                                                               | 0.02855 |
| STM1136         | ydcX    | hypothetical protein STM1136                    | -1.33                                                                              | 0.03111 | -0.51                                                                               | 0.14652 | -0.29                                                                               | 0.44030 |
| STM1137         | ydcY    | putative oxidoreductase component               | 0.12                                                                               | 0.89962 | -0.09                                                                               | 0.77248 | -0.82                                                                               | 0.03881 |
| STM1137         | ydcY    | putative oxidoreductase component               | 1.35                                                                               | 0.10510 | -0.04                                                                               | 0.89742 | 1.11                                                                                | 0.01631 |
| STM1138         | ydcZ    | putative inner membrane protein                 | -0.90                                                                              | 0.14219 | -0.99                                                                               | 0.00982 | -1.39                                                                               | 0.00733 |
| STM1138         | ydcZ    | putative inner membrane protein                 | 0.36                                                                               | 0.50612 | -0.97                                                                               | 0.01342 | 0.01                                                                                | 0.97989 |
| STM1139         | csgG    | putative curli operon transcriptional regulator | 0.96                                                                               | 0.06146 | -1.01                                                                               | 0.04316 | 0.63                                                                                | 0.44299 |
| STM1139         | csgG    | putative curli operon transcriptional regulator | 1.85                                                                               | 0.05385 | -0.88                                                                               | 0.03921 | 0.62                                                                                | 0.29466 |
| STM1140         | csgF    | curli production assembly/transport component   | 1.55                                                                               | 0.02633 | 0.85                                                                                | 0.04641 | 1.14                                                                                | 0.22330 |
| STM1140         | csgF    | curli production assembly/transport component   | 3.16                                                                               | 0.00541 | 0.71                                                                                | 0.06483 | 3.66                                                                                | 0.00212 |
| STM1141         | csgE    | curli production assembly/transport component   | 1.79                                                                               | 0.12594 | 3.41                                                                                | 0.00008 | 3.75                                                                                | 0.00011 |
| STM1141         | csgE    | curli production assembly/transport component   | 3.14                                                                               | 0.15151 | 2.48                                                                                | 0.02135 | 4.46                                                                                | 0.00096 |
| STM1142         | csgD    | putative transcriptional regulator              | -0.67                                                                              | 0.42423 | 0.77                                                                                | 0.15400 | 2.59                                                                                | 0.01019 |
| STM1142         | csgD    | putative transcriptional regulator              | 1.79                                                                               | 0.14654 | -0.84                                                                               | 0.02246 | 1.49                                                                                | 0.08465 |
| STM1143         | csgB    | minor curli subunit precursor                   | 0.20                                                                               | 0.89893 | -0.13                                                                               | 0.80331 | 0.73                                                                                | 0.43281 |
| STM1143         | csgB    | minor curli subunit precursor                   | 0.65                                                                               | 0.28620 | 0.04                                                                                | 0.97004 | 1.03                                                                                | 0.07429 |
| STM1144         | csgA    | major curli subunit precursor                   | -1.04                                                                              | 0.09155 | 0.51                                                                                | 0.18434 | -0.54                                                                               | 0.23926 |
| STM1144         | csgA    | major curli subunit precursor                   | 1.30                                                                               | 0.03644 | 0.09                                                                                | 0.82370 | 1.21                                                                                | 0.01550 |
| STM1145         | csgC    | putative curli production protein precursor     | 0.32                                                                               | 0.45778 | -0.04                                                                               | 0.92921 | 0.10                                                                                | 0.89293 |
| STM1145         | csgC    | putative curli production protein precursor     | 1.13                                                                               | 0.08198 | 0.14                                                                                | 0.79910 | 0.39                                                                                | 0.40867 |
| STM1146         | ymdA    | putative periplasmic protein                    | -0.76                                                                              | 0.15099 | -0.45                                                                               | 0.19139 | -0.71                                                                               | 0.22330 |
| STM1146         | ymdA    | putative periplasmic protein                    | -0.78                                                                              | 0.26249 | -0.91                                                                               | 0.05452 | -0.23                                                                               | 0.64697 |
| STM1147         | STM1147 | hypothetical protein STM1147                    | -0.65                                                                              | 0.53267 | -0.63                                                                               | 0.15124 | 0.10                                                                                | 0.84838 |
| STM1147         | STM1147 | hypothetical protein STM1147                    | 1.21                                                                               | 0.12119 | -1.25                                                                               | 0.02614 | 0.67                                                                                | 0.40243 |
| STM1148,S       | ymdC    | putative phospholipase                          | -0.05                                                                              | 0.93290 | -0.27                                                                               | 0.53139 | 0.01                                                                                | 0.99131 |
| STM1148,S       | ymdC    | putative phospholipase                          | -0.27                                                                              | 0.53193 | -0.26                                                                               | 0.49389 | -0.79                                                                               | 0.42420 |
| STM1149         | mdoC    | glucans biosynthesis protein                    | -0.96                                                                              | 0.06265 | -0.31                                                                               | 0.50364 | -1.17                                                                               | 0.02414 |
| STM1149         | mdoC    | glucans biosynthesis protein                    | -0.08                                                                              | 0.85069 | -0.98                                                                               | 0.00925 | -0.64                                                                               | 0.16963 |
| STM1150         | mdoG    | periplasmic glucans biosynthesis protein        | -0.92                                                                              | 0.20599 | -0.52                                                                               | 0.15086 | -1.11                                                                               | 0.03939 |
| STM1150         | mdoG    | periplasmic glucans biosynthesis protein        | 0.69                                                                               | 0.35080 | 0.09                                                                                | 0.80960 | -1.25                                                                               | 0.06066 |
| STM1151         | mdoH    | glucosyltransferase MdoH                        | -2.15                                                                              | 0.01449 | -0.54                                                                               | 0.60988 | -0.58                                                                               | 0.21151 |
| STM1151         | mdoH    | glucosyltransferase MdoH                        | -0.62                                                                              | 0.29377 | -0.64                                                                               | 0.10181 | -0.13                                                                               | 0.75917 |
| STM1152         | yceK    | putative outer membrane lipoprotein             | 0.23                                                                               | 0.71992 | -0.43                                                                               | 0.21799 | 1.20                                                                                | 0.00935 |
| STM1152         | yceK    | putative outer membrane lipoprotein             | 0.82                                                                               | 0.08921 | 0.42                                                                                | 0.20552 | 2.08                                                                                | 0.00177 |

**Table S2.** Genome-wide expression of *Salmonella enterica* serovar Typhimurium inside fibroblasts

|                    |         |                                                  | Intracellular WT<br>24 h p.i.    |         | Intracellular <i>phoP</i><br>24 h p.i.    |         | Extracellular WT<br>stationary phase |         |
|--------------------|---------|--------------------------------------------------|----------------------------------|---------|-------------------------------------------|---------|--------------------------------------|---------|
|                    |         |                                                  | Relative to WT<br>exponential LB |         | Relative to <i>phoP</i><br>exponential LB |         | Relative to WT<br>exponential LB     |         |
| Systematic<br>name | Gene    | Product                                          | log2Ratio<br>(M)                 | p value | log2Ratio<br>(M)                          | p value | log2Ratio<br>(M)                     | p value |
| STM1153            | msyB    | acidic protein                                   | 0.91                             | 0.15734 | 1.51                                      | 0.00182 | 2.57                                 | 0.00019 |
| STM1153            | msyB    | acidic protein                                   | 2.63                             | 0.00757 | 1.35                                      | 0.00848 | 2.83                                 | 0.00036 |
| STM1154            | yceE    | putative transport protein                       | 1.15                             | 0.04642 | 0.13                                      | 0.65822 | 1.49                                 | 0.00554 |
| STM1154            | yceE    | putative transport protein                       | 0.60                             | 0.20774 | -0.12                                     | 0.78293 | 1.73                                 | 0.00180 |
| STM1155            | htrB    | lipid A biosynthesis lauroyl acyltransferase     | 0.04                             | 0.96478 | 0.51                                      | 0.19689 | 1.05                                 | 0.05714 |
| STM1155            | htrB    | lipid A biosynthesis lauroyl acyltransferase     | -0.96                            | 0.08591 | 1.34                                      | 0.24959 | -0.14                                | 0.71477 |
| STM1156            | yceA    | hypothetical protein STM1156                     | -1.37                            | 0.06077 | -0.57                                     | 0.12575 | -1.69                                | 0.01455 |
| STM1156            | yceA    | hypothetical protein STM1156                     | -0.77                            | 0.29799 | -0.69                                     | 0.09349 | -0.45                                | 0.44129 |
| STM1157            | yceI    | hypothetical protein STM1157                     | -1.11                            | 0.03905 | 0.15                                      | 0.64171 | -1.08                                | 0.01512 |
| STM1157            | yceI    | hypothetical protein STM1157                     | 0.25                             | 0.66258 | -0.10                                     | 0.73506 | -0.94                                | 0.05015 |
| STM1158            | STM1158 | putative inner membrane protein                  | -0.56                            | 0.22379 | 1.08                                      | 0.01468 | 0.25                                 | 0.49466 |
| STM1158            | STM1158 | putative inner membrane protein                  | 0.67                             | 0.28930 | 0.67                                      | 0.07308 | 1.03                                 | 0.12732 |
| STM1159            | yceO    | putative inner membrane protein                  | -1.03                            | 0.06965 | 0.07                                      | 0.90424 | 0.31                                 | 0.49552 |
| STM1159            | yceO    | putative inner membrane protein                  | -0.93                            | 0.15633 | -1.04                                     | 0.01296 | -0.75                                | 0.16413 |
| STM1160            | solA    | putative sarcosine oxidase                       | -0.29                            | 0.60632 | -0.70                                     | 0.08143 | -0.71                                | 0.16107 |
| STM1160            | solA    | putative sarcosine oxidase                       | -1.00                            | 0.09268 | -0.60                                     | 0.21882 | -0.06                                | 0.90141 |
| STM1161,S          | yceP    | putative cytoplasmic protein                     | -0.19                            | 0.84231 | -0.71                                     | 0.05519 | -0.46                                | 0.34632 |
| STM1161,S          | yceP    | putative cytoplasmic protein                     | 1.02                             | 0.11276 | -0.70                                     | 0.13604 | 0.50                                 | 0.27415 |
| STM1162            | dinI    | DNA damage-inducible protein I                   | -0.93                            | 0.11919 | -0.53                                     | 0.11130 | -1.99                                | 0.00132 |
| STM1162            | dinI    | DNA damage-inducible protein I                   | 0.21                             | 0.70846 | -0.10                                     | 0.74028 | -1.32                                | 0.00728 |
| STM1163            | pyrC    | dihydroorotase                                   | -0.79                            | 0.20430 | -0.11                                     | 0.72185 | -0.68                                | 0.24227 |
| STM1163            | pyrC    | dihydroorotase                                   | -0.93                            | 0.30487 | 0.06                                      | 0.88289 | -0.88                                | 0.09577 |
| STM1164            | yceB    | putative outer membrane lipoprotein              | 1.49                             | 0.06207 | 1.11                                      | 0.00517 | 2.22                                 | 0.00264 |
| STM1164            | yceB    | putative outer membrane lipoprotein              | 1.51                             | 0.08560 | 1.03                                      | 0.06483 | 3.38                                 | 0.00012 |
| STM1165            | grxB    | glutaredoxin 2                                   | -1.61                            | 0.03383 | 2.53                                      | 0.00011 | 4.81                                 | 0.00003 |
| STM1165            | grxB    | glutaredoxin 2                                   | -1.36                            | 0.02648 | 2.38                                      | 0.00017 | 5.05                                 | 0.00003 |
| STM1166            | yceL    | putative transport protein                       | -0.66                            | 0.21058 | -0.31                                     | 0.62309 | 1.26                                 | 0.01357 |
| STM1166            | yceL    | putative transport protein                       | -0.26                            | 0.63700 | 0.13                                      | 0.69793 | 1.51                                 | 0.01355 |
| STM1167            | rimJ    | acetylase                                        | -1.48                            | 0.09162 | -0.21                                     | 0.42946 | -0.20                                | 0.64931 |
| STM1167            | rimJ    | acetylase                                        | 0.02                             | 0.97778 | -0.29                                     | 0.41161 | -0.80                                | 0.11922 |
| STM1168            | yceH    | putative cytoplasmic protein                     | -1.32                            | 0.02281 | -0.04                                     | 0.92231 | -1.99                                | 0.00186 |
| STM1168            | yceH    | putative cytoplasmic protein                     | -0.76                            | 0.09447 | -0.21                                     | 0.59685 | -1.17                                | 0.02040 |
| STM1169            | mviM    | putative virulence protein                       | 1.22                             | 0.09283 | -1.35                                     | 0.01310 | -0.85                                | 0.10550 |
| STM1169            | mviM    | putative virulence protein                       | 1.61                             | 0.02080 | -1.29                                     | 0.02640 | 0.15                                 | 0.76309 |
| STM1170            | mviN    | putative virulence protein                       | -2.22                            | 0.00900 | -3.01                                     | 0.00389 | -2.19                                | 0.00162 |
| STM1170            | mviN    | putative virulence protein                       | -2.36                            | 0.01487 | -2.14                                     | 0.00027 | -2.21                                | 0.00182 |
| STM1171            | flgN    | putative FlgK/FlgL export chaperone              | -1.55                            | 0.02729 | -2.84                                     | 0.00004 | -2.38                                | 0.00032 |
| STM1171            | flgN    | putative FlgK/FlgL export chaperone              | -1.22                            | 0.14283 | -2.50                                     | 0.00023 | -2.56                                | 0.00063 |
| STM1172            | flgM    | anti-FlhA factor                                 | -1.48                            | 0.01741 | -2.99                                     | 0.00005 | -1.04                                | 0.04723 |
| STM1172            | flgM    | anti-FlhA factor                                 | -0.62                            | 0.31320 | -2.79                                     | 0.00008 | -0.81                                | 0.09838 |
| STM1173            | flgA    | flagellar basal body P-ring biosynthesis protein | -3.72                            | 0.00541 | -2.74                                     | 0.00024 | -1.47                                | 0.02499 |
| STM1173            | flgA    | flagellar basal body P-ring biosynthesis protein | -2.66                            | 0.00654 | -2.86                                     | 0.00003 | -1.46                                | 0.00257 |
| STM1174            | flgB    | flagellar basal body rod protein                 | -3.88                            | 0.00512 | -3.10                                     | 0.00005 | -4.68                                | 0.00008 |
| STM1174            | flgB    | flagellar basal body rod protein                 | -3.20                            | 0.00546 | -3.05                                     | 0.00008 | -4.41                                | 0.00036 |
| STM1175            | flgC    | flagellar basal body rod protein                 | -3.48                            | 0.00775 | -3.07                                     | 0.00011 | -5.88                                | 0.00079 |
| STM1175            | flgC    | flagellar basal body rod protein                 | -2.10                            | 0.00900 | -3.18                                     | 0.00006 | -4.15                                | 0.00007 |
| STM1176            | flgD    | flagellar basal body rod modification protein    | -3.15                            | 0.00673 | -2.90                                     | 0.00017 | -3.43                                | 0.00024 |
| STM1176            | flgD    | flagellar basal body rod modification protein    | -1.61                            | 0.02200 | -2.95                                     | 0.00051 | -3.20                                | 0.03101 |
| STM1177            | flgE    | flagellar hook protein                           | -3.55                            | 0.00638 | -4.13                                     | 0.00001 | -3.20                                | 0.00024 |
| STM1177            | flgE    | flagellar hook protein                           | -2.30                            | 0.00727 | -3.38                                     | 0.00004 | -3.52                                | 0.00020 |
| STM1178            | flgF    | cell-proximal portion of basal-body rod          | -2.31                            | 0.01326 | -3.15                                     | 0.00022 | -2.61                                | 0.00058 |
| STM1178            | flgF    | cell-proximal portion of basal-body rod          | -0.70                            | 0.29448 | -3.00                                     | 0.00003 | -1.95                                | 0.00176 |
| STM1179            | flgG    | flagellar basal-body rod protein                 | -1.90                            | 0.01712 | -2.76                                     | 0.00005 | -2.80                                | 0.00145 |
| STM1179            | flgG    | flagellar basal-body rod protein                 | -0.86                            | 0.37508 | -2.83                                     | 0.00016 | -2.44                                | 0.00148 |
| STM1180            | flgH    | flagellar L-ring protein precursor               | 0.37                             | 0.51564 | -3.51                                     | 0.00002 | -2.39                                | 0.00275 |
| STM1180            | flgH    | flagellar L-ring protein precursor               | 0.17                             | 0.89679 | -3.84                                     | 0.00001 | -2.14                                | 0.01023 |
| STM1181            | flgI    | flagellar P-ring protein precursor               | -2.80                            | 0.00626 | -3.17                                     | 0.00014 | -3.69                                | 0.00024 |
| STM1181            | flgI    | flagellar P-ring protein precursor               | -3.64                            | 0.00650 | -2.84                                     | 0.00024 | -4.10                                | 0.00341 |
| STM1182            | flgJ    | flagellar biosynthesis protein                   | -1.12                            | 0.11805 | -1.94                                     | 0.00102 | -0.48                                | 0.18479 |
| STM1182            | flgJ    | flagellar biosynthesis protein                   | -0.91                            | 0.24987 | -2.83                                     | 0.00027 | -0.29                                | 0.54946 |
| STM1183            | flgK    | flagellar hook-associated protein                | -3.26                            | 0.00547 | -3.75                                     | 0.00006 | -4.52                                | 0.00041 |
| STM1183            | flgK    | flagellar hook-associated protein                | -3.25                            | 0.00537 | -3.20                                     | 0.00002 | -3.69                                | 0.00018 |
| STM1184            | flgL    | flagellar hook-associated protein                | -2.45                            | 0.00686 | -2.22                                     | 0.00024 | -3.05                                | 0.00022 |
| STM1184            | flgL    | flagellar hook-associated protein                | -1.39                            | 0.06207 | -2.21                                     | 0.00036 | -2.03                                | 0.00126 |
| STM1185            | rne     | RNase E                                          | -1.44                            | 0.04050 | -0.16                                     | 0.70393 | -2.16                                | 0.01192 |
| STM1185            | rne     | RNase E                                          | -0.71                            | 0.25977 | -0.35                                     | 0.33318 | -2.27                                | 0.01739 |
| STM1187            | rluC    | 23S rRNA pseudouridylation synthase              | -1.50                            | 0.01850 | -0.78                                     | 0.04236 | -1.02                                | 0.01979 |
| STM1187            | rluC    | 23S rRNA pseudouridylation synthase              | -2.43                            | 0.01914 | -1.77                                     | 0.00126 | -2.41                                | 0.00042 |
| STM1188            | STM1188 | putative inner membrane lipoprotein              | -0.87                            | 0.28560 | -0.98                                     | 0.00811 | -1.28                                | 0.00997 |
| STM1188            | STM1188 | putative inner membrane lipoprotein              | 0.50                             | 0.78024 | -0.92                                     | 0.01800 | -0.57                                | 0.14314 |

**Table S2.** Genome-wide expression of *Salmonella enterica* serovar Typhimurium inside fibroblasts

Intracellular WT 24 h p.i.      Intracellular *phoP* 24 h p.i.      Extracellular WT stationary phase

Relative to WT exponential LB      Relative to *phoP* exponential LB      Relative to WT exponential LB



| Systematic name | Gene | Product                                           | log2Ratio (M) | p value | log2Ratio (M) | p value | log2Ratio (M) | p value |
|-----------------|------|---------------------------------------------------|---------------|---------|---------------|---------|---------------|---------|
| STM1189         | maf  | Maf-like protein                                  | -1.89         | 0.00927 | -1.62         | 0.05633 | -1.93         | 0.00120 |
| STM1189         | maf  | Maf-like protein                                  | -0.88         | 0.13943 | -0.93         | 0.01137 | -1.11         | 0.09595 |
| STM1190         | yceD | putative metal-binding protein                    | -4.19         | 0.00595 | -0.63         | 0.07115 | -5.15         | 0.00002 |
| STM1190         | yceD | putative metal-binding protein                    | -3.62         | 0.00512 | -0.56         | 0.10488 | -4.87         | 0.00003 |
| STM1192         | plsX | fatty acid/phospholipid synthesis protein         | -2.01         | 0.01382 | -1.07         | 0.01019 | -2.72         | 0.00021 |
| STM1192         | plsX | fatty acid/phospholipid synthesis protein         | -1.03         | 0.06731 | -0.38         | 0.19474 | -2.74         | 0.00018 |
| STM1193         | fabH | 3-oxoacyl-(acyl carrier protein) synthase         | -2.54         | 0.00789 | -1.70         | 0.00108 | -3.37         | 0.00040 |
| STM1193         | fabH | 3-oxoacyl-(acyl carrier protein) synthase         | -2.28         | 0.01125 | -0.99         | 0.01654 | -3.45         | 0.00006 |
| STM1194         | fabD | acyl carrier protein S-malonyltransferase         | -1.05         | 0.08484 | -0.49         | 0.26487 | -0.55         | 0.14294 |
| STM1194         | fabD | acyl carrier protein S-malonyltransferase         | -2.27         | 0.02977 | -1.17         | 0.02811 | -4.17         | 0.00004 |
| STM1194         | fabD | acyl carrier protein S-malonyltransferase         | -1.04         | 0.11320 | -0.56         | 0.05767 | 0.58          | 0.53322 |
| STM1194         | fabD | acyl carrier protein S-malonyltransferase         | -1.18         | 0.05377 | -0.72         | 0.03219 | -3.99         | 0.00006 |
| STM1195         | fabG | 3-ketoacyl-(acyl-carrier-protein) reductase       | -3.50         | 0.00545 | -1.84         | 0.00438 | -3.11         | 0.00018 |
| STM1195         | fabG | 3-ketoacyl-(acyl-carrier-protein) reductase       | -3.43         | 0.00537 | -1.60         | 0.00210 | -3.67         | 0.00005 |
| STM1196         | acpP | acyl carrier protein                              | -2.05         | 0.04704 | 0.47          | 0.16195 | -1.51         | 0.00261 |
| STM1196         | acpP | acyl carrier protein                              | 0.07          | 0.92939 | 0.29          | 0.35037 | -0.84         | 0.03493 |
| STM1197         | fabF | 3-oxoacyl-(acyl carrier protein) synthase         | -2.89         | 0.00547 | -1.23         | 0.01173 | -2.96         | 0.00126 |
| STM1197         | fabF | 3-oxoacyl-(acyl carrier protein) synthase         | -2.36         | 0.02202 | -0.17         | 0.67751 | -3.51         | 0.00588 |
| STM1198         | pabC | 4-amino-4-deoxychorismate lyase                   | -0.33         | 0.81891 | -0.12         | 0.72955 | -1.34         | 0.00581 |
| STM1198         | pabC | 4-amino-4-deoxychorismate lyase                   | -0.25         | 0.74644 | -0.70         | 0.02836 | -1.27         | 0.04371 |
| STM1199         | yceG | putative periplasmic solute-binding protein       | -0.10         | 0.84317 | 0.14          | 0.68302 | -1.25         | 0.01255 |
| STM1199         | yceG | putative periplasmic solute-binding protein       | -0.31         | 0.78250 | -0.35         | 0.36495 | -0.19         | 0.67238 |
| STM1200         | tmk  | thymidylate kinase                                | -2.43         | 0.01199 | -1.15         | 0.20610 | -1.63         | 0.01435 |
| STM1200         | tmk  | thymidylate kinase                                | -2.17         | 0.09987 | -1.99         | 0.00033 | -1.92         | 0.00206 |
| STM1201         | holB | DNA polymerase III subunit delta                  | -2.27         | 0.02062 | -1.77         | 0.00180 | -2.47         | 0.00028 |
| STM1201         | holB | DNA polymerase III subunit delta                  | -1.92         | 0.01798 | -1.45         | 0.00170 | -2.72         | 0.00064 |
| STM1202         | ycfH | putative metal-dependent hydrolase                | -2.04         | 0.05687 | -1.85         | 0.00045 | -1.77         | 0.00124 |
| STM1202         | ycfH | putative metal-dependent hydrolase                | -1.20         | 0.03725 | -1.56         | 0.00199 | -1.25         | 0.02633 |
| STM1203         | ptsG | glucose-specific IIBC component                   | -2.33         | 0.00822 | -1.02         | 0.00778 | -1.87         | 0.00618 |
| STM1203         | ptsG | glucose-specific IIBC component                   | -0.36         | 0.44116 | -0.93         | 0.01367 | -1.25         | 0.01458 |
| STM1204         | fhuE | outer membrane receptor protein precursor         | -1.14         | 0.21328 | -0.25         | 0.55836 | -0.06         | 0.93644 |
| STM1204         | fhuE | outer membrane receptor protein precursor         | -0.20         | 0.86396 | 0.40          | 0.25713 | -0.21         | 0.63854 |
| STM1205         | ycfF | putative protein kinase C inhibitor               | -2.66         | 0.03447 | -0.25         | 0.39902 | -0.56         | 0.17630 |
| STM1205         | ycfF | putative protein kinase C inhibitor               | -2.29         | 0.01479 | -0.24         | 0.42846 | -0.83         | 0.04927 |
| STM1206         | ycfL | putative outer membrane lipoprotein               | -1.28         | 0.03186 | 0.62          | 0.08589 | -0.68         | 0.06501 |
| STM1206         | ycfL | putative outer membrane lipoprotein               | -1.07         | 0.04020 | 0.78          | 0.04469 | -0.14         | 0.79381 |
| STM1207         | ycfM | putative outer membrane lipoprotein               | -1.27         | 0.04403 | 0.33          | 0.28016 | -0.91         | 0.07048 |
| STM1207         | ycfM | putative outer membrane lipoprotein               | -0.18         | 0.76451 | 0.77          | 0.02382 | -0.01         | 0.97790 |
| STM1208         | ycfN | putative cytoplasmic protein                      | -1.79         | 0.01297 | -1.24         | 0.00316 | -1.42         | 0.01093 |
| STM1208         | ycfN | putative cytoplasmic protein                      | -0.70         | 0.27805 | -0.56         | 0.07566 | -1.31         | 0.00576 |
| STM1209         | nagZ | beta-hexosaminidase                               | -0.99         | 0.10289 | -0.30         | 0.28109 | -0.25         | 0.60259 |
| STM1209         | nagZ | beta-hexosaminidase                               | -1.15         | 0.11970 | 0.30          | 0.34944 | -0.27         | 0.52982 |
| STM1210         | ycfP | hypothetical protein STM1210                      | -1.18         | 0.07112 | 0.82          | 0.01483 | 0.07          | 0.85584 |
| STM1210         | ycfP | hypothetical protein STM1210                      | -0.69         | 0.39109 | 0.90          | 0.02115 | 0.14          | 0.78683 |
| STM1211         | ndh  | respiratory NADH dehydrogenase 2                  | -0.50         | 0.40724 | 0.06          | 0.85963 | -0.75         | 0.08000 |
| STM1211         | ndh  | respiratory NADH dehydrogenase 2                  | 0.09          | 0.83296 | 0.02          | 0.95569 | 0.43          | 0.32911 |
| STM1212         | ycfJ | putative outer membrane lipoprotein               | -0.71         | 0.32144 | 0.81          | 0.02560 | 2.37          | 0.00188 |
| STM1212         | ycfJ | putative outer membrane lipoprotein               | 0.49          | 0.31047 | 1.31          | 0.00376 | 2.67          | 0.00016 |
| STM1213         | ycfQ | putative transcriptional repressor                | 3.94          | 0.08857 | 1.06          | 0.02131 | 2.38          | 0.06440 |
| STM1213         | ycfQ | putative transcriptional repressor                | 1.09          | 0.06074 | 1.68          | 0.00494 | 2.15          | 0.00085 |
| STM1214         | ycfR | putative outer membrane protein                   | 1.40          | 0.03457 | 4.75          | 0.00001 | 1.48          | 0.00656 |
| STM1214         | ycfR | putative outer membrane protein                   | 2.38          | 0.01013 | 4.74          | 0.00001 | 2.28          | 0.00139 |
| STM1215         | ycfS | putative periplasmic protein                      | -0.52         | 0.43730 | 2.80          | 0.00009 | 0.48          | 0.25502 |
| STM1215         | ycfS | putative periplasmic protein                      | 1.00          | 0.12267 | 2.94          | 0.00007 | 1.09          | 0.04898 |
| STM1216         | mfd  | transcription-repair coupling factor              | -0.72         | 0.34609 | 0.36          | 0.36876 | -0.88         | 0.05453 |
| STM1216         | mfd  | transcription-repair coupling factor              | -0.26         | 0.55064 | -0.55         | 0.35270 | -0.58         | 0.12666 |
| STM1217,S       | ycfU | integral membrane protein                         | -1.73         | 0.02067 | -1.37         | 0.00203 | -2.12         | 0.00089 |
| STM1217,S       | ycfU | integral membrane protein                         | -1.93         | 0.01842 | -1.98         | 0.00020 | -1.49         | 0.00538 |
| STM1218         | ycfV | ATP-binding protein                               | -1.59         | 0.02670 | -1.63         | 0.00286 | -3.53         | 0.00187 |
| STM1218         | ycfV | ATP-binding protein                               | -1.88         | 0.01214 | -1.86         | 0.00052 | -2.07         | 0.00095 |
| STM1219         | ycfW | integral membrane protein                         | 1.88          | 0.02673 | 2.72          | 0.00109 | -2.01         | 0.00319 |
| STM1219         | ycfW | integral membrane protein                         | 2.67          | 0.00719 | 3.26          | 0.00049 | -1.97         | 0.00340 |
| STM1220         | ycfX | putative regulatory protein                       | -0.28         | 0.71501 | -0.03         | 0.94477 | -1.39         | 0.00720 |
| STM1220         | ycfX | putative regulatory protein                       | -0.61         | 0.29939 | -0.16         | 0.64293 | -0.55         | 0.58972 |
| STM1221         | cobB | NAD-dependent deacetylase                         | -1.78         | 0.02872 | 2.29          | 0.00015 | -2.34         | 0.01703 |
| STM1221         | cobB | NAD-dependent deacetylase                         | -0.75         | 0.25111 | 2.85          | 0.00013 | -2.04         | 0.00427 |
| STM1222         | potD | spermidine/putrescine ABC transporter periplasmic | -0.66         | 0.27015 | 3.81          | 0.00002 | -0.94         | 0.04839 |
| STM1222         | potD | spermidine/putrescine ABC transporter periplasmic | -0.54         | 0.50018 | 3.60          | 0.00007 | -1.79         | 0.02445 |
| STM1223         | potC | spermidine/putrescine ABC transporter membrane    | -1.06         | 0.09734 | 2.85          | 0.00014 | -2.73         | 0.00025 |
| STM1223         | potC | spermidine/putrescine ABC transporter membrane    | -1.26         | 0.03991 | 3.17          | 0.00012 | -1.63         | 0.01481 |

**Table S2.** Genome-wide expression of *Salmonella enterica* serovar Typhimurium inside fibroblasts

Intracellular WT 24 h p.i.      Intracellular *phoP* 24 h p.i.      Extracellular WT stationary phase

Relative to WT exponential LB      Relative to *phoP* exponential LB      Relative to WT exponential LB



| Systematic name | Gene    | Product                                                 | log2Ratio (M) | p value | log2Ratio (M) | p value | log2Ratio (M) | p value |
|-----------------|---------|---------------------------------------------------------|---------------|---------|---------------|---------|---------------|---------|
| STM1224         | sifA    | secreted effector protein                               | -1.19         | 0.07943 | 3.57          | 0.00005 | -0.20         | 0.65210 |
| STM1224         | sifA    | secreted effector protein                               | -1.02         | 0.19173 | 4.02          | 0.00009 | 0.48          | 0.22113 |
| STM1225         | potB    | spermidine/putrescine ABC transporter membrane          | -1.67         | 0.01487 | 0.86          | 0.03644 | -0.04         | 0.93346 |
| STM1225         | potB    | spermidine/putrescine ABC transporter membrane          | -1.34         | 0.03892 | 1.38          | 0.00468 | -1.24         | 0.02326 |
| STM1226         | potA    | putrescine/spermidine ABC transporter ATPase            | -0.57         | 0.21998 | -0.72         | 0.03100 | 1.44          | 0.11656 |
| STM1226         | potA    | putrescine/spermidine ABC transporter ATPase            | -0.21         | 0.71833 | -0.76         | 0.02818 | 0.63          | 0.10917 |
| STM1227         | pepT    | peptidase T                                             | 0.19          | 0.78623 | 1.02          | 0.00594 | 0.22          | 0.62184 |
| STM1227         | pepT    | peptidase T                                             | 0.06          | 0.92304 | 0.48          | 0.12874 | 0.84          | 0.11623 |
| STM1228         | STM1228 | putative periplasmic protein                            | -1.31         | 0.03466 | -0.47         | 0.14722 | -1.03         | 0.05594 |
| STM1228         | STM1228 | putative periplasmic protein                            | -0.17         | 0.82608 | -0.51         | 0.16069 | -0.45         | 0.32032 |
| STM1229         | ycfD    | putative cytoplasmic protein                            | 0.03          | 0.96020 | 0.12          | 0.89875 | -1.36         | 0.01446 |
| STM1229         | ycfD    | putative cytoplasmic protein                            | 1.44          | 0.03862 | -0.26         | 0.42325 | -0.46         | 0.22580 |
| STM1230         | phoQ    | sensor kinase protein                                   | -1.13         | 0.04050 | -0.68         | 0.18388 | 0.69          | 0.25829 |
| STM1230         | phoQ    | sensor kinase protein                                   | 0.05          | 0.92973 | 0.08          | 0.80333 | -0.97         | 0.39673 |
| STM1231         | phoP    | response regulator                                      | -0.16         | 0.79826 | 0.80          | 0.05120 | -0.94         | 0.02478 |
| STM1231         | phoP    | response regulator                                      | 1.16          | 0.06218 | 0.52          | 0.17419 | -0.38         | 0.34435 |
| STM1232         | purB    | adenylosuccinate lyase                                  | -1.76         | 0.02009 | 0.74          | 0.08377 | -2.36         | 0.00257 |
| STM1232         | purB    | adenylosuccinate lyase                                  | 0.15          | 0.80373 | 1.19          | 0.00849 | -1.65         | 0.00271 |
| STM1233         | ycfC    | hypothetical protein STM1233                            | -2.06         | 0.00749 | 0.06          | 0.86562 | -2.31         | 0.00171 |
| STM1233         | ycfC    | hypothetical protein STM1233                            | -1.61         | 0.01710 | 0.11          | 0.75865 | -3.05         | 0.00075 |
| STM1234,S       | trmU    | tRNA (5-methylaminomethyl-2-thiouridylate)-             | -1.60         | 0.07463 | -0.23         | 0.63112 | -2.46         | 0.00606 |
| STM1234,S       | trmU    | tRNA (5-methylaminomethyl-2-thiouridylate)-             | -2.24         | 0.04748 | -0.86         | 0.02230 | -2.59         | 0.00064 |
| STM1235         | ymfB    | putative MutT-like protein                              | -1.24         | 0.02803 | -0.76         | 0.02099 | -0.73         | 0.06609 |
| STM1235         | ymfB    | putative MutT-like protein                              | -0.88         | 0.07453 | -0.66         | 0.06503 | -1.01         | 0.05834 |
| STM1236         | STM1236 | putative periplasmic protein                            | -0.68         | 0.13167 | 0.66          | 0.06013 | -0.08         | 0.84222 |
| STM1236         | STM1236 | putative periplasmic protein                            | -0.27         | 0.55997 | 0.50          | 0.12049 | 0.49          | 0.26965 |
| STM1237         | ymfC    | putative ribosomal large subunit pseudouridine synthase | -1.25         | 0.04338 | 0.09          | 0.78751 | 0.35          | 0.36950 |
| STM1237         | ymfC    | putative ribosomal large subunit pseudouridine synthase | 0.83          | 0.51078 | 0.13          | 0.77307 | 1.73          | 0.00430 |
| STM1238         | icdA    | isocitrate dehydrogenase                                | 0.32          | 0.50178 | 1.98          | 0.00033 | 0.01          | 0.99021 |
| STM1238         | icdA    | isocitrate dehydrogenase                                | 1.09          | 0.10533 | 2.11          | 0.00033 | 0.30          | 0.46670 |
| STM1239         | STM1239 | putative cytoplasmic protein                            | -0.41         | 0.42933 | -1.14         | 0.00628 | -1.13         | 0.02259 |
| STM1239         | STM1239 | putative cytoplasmic protein                            | -0.08         | 0.87827 | -0.22         | 0.46533 | 0.20          | 0.70420 |
| STM1240         | envF    | putative envelope lipoprotein                           | 2.55          | 0.00595 | 2.59          | 0.00034 | 3.56          | 0.00007 |
| STM1240         | envF    | putative envelope lipoprotein                           | 3.87          | 0.00512 | 1.60          | 0.02012 | 4.38          | 0.00004 |
| STM1241         | msgA    | macrophage survival protein                             | 1.32          | 0.04762 | 1.46          | 0.00117 | 0.87          | 0.06411 |
| STM1241         | msgA    | macrophage survival protein                             | 1.97          | 0.01338 | 1.53          | 0.00793 | 1.20          | 0.01305 |
| STM1242         | envE    | putative envelope protein                               | 1.01          | 0.16597 | 1.33          | 0.00266 | -1.21         | 0.03497 |
| STM1242         | envE    | putative envelope protein                               | 2.02          | 0.01336 | 0.80          | 0.03395 | -0.53         | 0.50644 |
| STM1246         | pagC    | virulence membrane protein PAGC precursor               | 2.25          | 0.03476 | -0.32         | 0.41810 | 0.21          | 0.74983 |
| STM1246         | pagC    | virulence membrane protein PAGC precursor               | 3.23          | 0.00567 | 0.09          | 0.87638 | 0.47          | 0.21424 |
| STM1247         | -       | STM1247                                                 | 0.16          | 0.88701 | -1.93         | 0.00201 | -1.09         | 0.20564 |
| STM1247         | -       | STM1247                                                 | 0.81          | 0.15411 | -0.71         | 0.03494 | -0.60         | 0.18270 |
| STM1249         | STM1249 | putative periplasmic protein                            | 2.18          | 0.01405 | 1.65          | 0.00556 | 1.89          | 0.00449 |
| STM1249         | STM1249 | putative periplasmic protein                            | 1.94          | 0.01686 | 1.36          | 0.00999 | 1.23          | 0.04890 |
| STM1250         | STM1250 | putative cytoplasmic protein                            | -0.31         | 0.72379 | 4.03          | 0.00001 | 1.02          | 0.05310 |
| STM1250         | STM1250 | putative cytoplasmic protein                            | 1.85          | 0.04021 | 4.66          | 0.00007 | -0.56         | 0.62607 |
| STM1251         | STM1251 | putative molecular chaperone                            | 2.56          | 0.00822 | 2.22          | 0.00612 | 3.94          | 0.00008 |
| STM1251         | STM1251 | putative molecular chaperone                            | 2.93          | 0.00547 | 2.44          | 0.00151 | 5.00          | 0.00002 |
| STM1252         | STM1252 | putative cytoplasmic protein                            | -0.24         | 0.69442 | 0.06          | 0.87217 | -0.90         | 0.10467 |
| STM1252         | STM1252 | putative cytoplasmic protein                            | 0.76          | 0.16872 | -0.10         | 0.78795 | -0.33         | 0.45390 |
| STM1253         | STM1253 | putative inner membrane protein                         | 0.38          | 0.44694 | 0.51          | 0.21874 | -1.08         | 0.03795 |
| STM1253         | STM1253 | putative inner membrane protein                         | 0.46          | 0.45939 | 0.16          | 0.61565 | -0.37         | 0.56263 |
| STM1254         | STM1254 | putative outer membrane lipoprotein                     | 1.28          | 0.07541 | -0.33         | 0.37130 | -1.28         | 0.02264 |
| STM1254         | STM1254 | putative outer membrane lipoprotein                     | 1.54          | 0.02838 | 0.40          | 0.21470 | -0.81         | 0.11620 |
| STM1255         | STM1255 | putative ABC transporter periplasmic binding protein    | 0.48          | 0.30354 | 0.21          | 0.54205 | -0.72         | 0.11283 |
| STM1255         | STM1255 | putative ABC transporter periplasmic binding protein    | 1.77          | 0.02262 | 0.49          | 0.20234 | 1.21          | 0.04578 |
| STM1256         | STM1256 | putative ABC transporter protein                        | 0.62          | 0.20618 | -0.36         | 0.33250 | -0.19         | 0.81438 |
| STM1256         | STM1256 | putative ABC transporter protein                        | 0.33          | 0.62623 | -0.51         | 0.21436 | -0.48         | 0.45088 |
| STM1257         | STM1257 | putative ABC transporter protein                        | 1.32          | 0.21088 | -0.17         | 0.70369 | -0.73         | 0.08855 |
| STM1257         | STM1257 | putative ABC transporter protein                        | -0.10         | 0.93065 | -0.51         | 0.43613 | 0.77          | 0.09992 |
| STM1258         | STM1258 | putative ABC-type transport system ATPase component     | 0.72          | 0.15198 | 1.32          | 0.00190 | -0.10         | 0.84763 |
| STM1258         | STM1258 | putative ABC-type transport system ATPase component     | 2.47          | 0.00719 | 0.37          | 0.55517 | -0.08         | 0.91510 |
| STM1259         | STM1259 | putative ABC-type transport system ATPase component     | -0.33         | 0.60114 | -0.28         | 0.45487 | -0.10         | 0.86177 |
| STM1259         | STM1259 | putative ABC-type transport system ATPase component     | 0.49          | 0.45004 | -0.44         | 0.33811 | 0.16          | 0.79018 |
| STM1260         | STM1260 | putative inner membrane protein                         | 1.28          | 0.12218 | 0.24          | 0.43855 | 2.51          | 0.00167 |
| STM1260         | STM1260 | putative inner membrane protein                         | 2.71          | 0.00674 | 0.68          | 0.06102 | 3.74          | 0.00012 |
| STM1261         | STM1261 | putative cytoplasmic protein                            | 0.09          | 0.85065 | 0.45          | 0.16033 | 2.05          | 0.00053 |
| STM1261         | STM1261 | putative cytoplasmic protein                            | 1.02          | 0.16661 | 0.37          | 0.19460 | 3.05          | 0.00011 |
| STM1262         | -       | STM1262                                                 | 0.01          | 0.99034 | 1.36          | 0.01427 | 1.64          | 0.03857 |
| STM1262         | -       | STM1262                                                 | 0.85          | 0.13564 | 1.83          | 0.00047 | 2.33          | 0.00070 |

**Table S2.** Genome-wide expression of *Salmonella enterica* serovar Typhimurium inside fibroblasts

|                 |            |                                              | Intracellular WT<br>24 h p.i.                                                      |         | Intracellular <i>phoP</i><br>24 h p.i.                                              |         | Extracellular WT<br>stationary phase                                                |         |
|-----------------|------------|----------------------------------------------|------------------------------------------------------------------------------------|---------|-------------------------------------------------------------------------------------|---------|-------------------------------------------------------------------------------------|---------|
|                 |            |                                              | Relative to WT<br>exponential LB                                                   |         | Relative to <i>phoP</i><br>exponential LB                                           |         | Relative to WT<br>exponential LB                                                    |         |
|                 |            |                                              |  |         |  |         |  |         |
| Systematic name | Gene       | Product                                      | log2Ratio (M)                                                                      | p value | log2Ratio (M)                                                                       | p value | log2Ratio (M)                                                                       | p value |
| STM1263         | STM1263    | putative periplasmic protein                 | -0.49                                                                              | 0.23895 | 0.81                                                                                | 0.02710 | 0.87                                                                                | 0.04291 |
| STM1263         | STM1263    | putative periplasmic protein                 | -0.12                                                                              | 0.83757 | -0.40                                                                               | 0.29806 | 1.58                                                                                | 0.17193 |
| STM1264         | aadA       | aminoglycoside adenylyltransferase           | 0.34                                                                               | 0.44306 | 0.30                                                                                | 0.48722 | -0.39                                                                               | 0.37601 |
| STM1264         | aadA       | aminoglycoside adenylyltransferase           | 1.86                                                                               | 0.03785 | -0.01                                                                               | 0.97910 | 2.02                                                                                | 0.07942 |
| STM1265         | STM1265    | putative response regulator                  | 0.00                                                                               | 0.99678 | 0.18                                                                                | 0.52384 | 0.46                                                                                | 0.52618 |
| STM1265         | STM1265    | putative response regulator                  | 1.09                                                                               | 0.05652 | 0.24                                                                                | 0.48493 | 0.57                                                                                | 0.31828 |
| STM1266         | STM1266    | putative transcriptional regulator           | 0.18                                                                               | 0.66131 | 0.25                                                                                | 0.55604 | 0.41                                                                                | 0.31551 |
| STM1266         | STM1266    | putative transcriptional regulator           | 1.74                                                                               | 0.02617 | 0.55                                                                                | 0.10179 | 0.55                                                                                | 0.28780 |
| STM1267         | STM1267    | putative cytoplasmic protein                 | -0.61                                                                              | 0.36105 | 0.22                                                                                | 0.62745 | 1.34                                                                                | 0.02608 |
| STM1267         | STM1267    | putative cytoplasmic protein                 | -0.75                                                                              | 0.11866 | -0.08                                                                               | 0.83378 | 1.77                                                                                | 0.00119 |
| STM1268         | STM1268    | putative cytoplasmic protein                 | -0.97                                                                              | 0.20321 | 1.41                                                                                | 0.00437 | -0.04                                                                               | 0.95858 |
| STM1268         | STM1268    | putative cytoplasmic protein                 | 2.02                                                                               | 0.06385 | 0.64                                                                                | 0.39981 | 0.49                                                                                | 0.17630 |
| STM1269         | STM1269    | chorismate mutase                            | -0.20                                                                              | 0.65687 | -0.33                                                                               | 0.59520 | -0.96                                                                               | 0.01993 |
| STM1269         | STM1269    | chorismate mutase                            | 1.20                                                                               | 0.32861 | -0.44                                                                               | 0.22601 | -0.34                                                                               | 0.65948 |
| STM1270         | yeaS       | putative transport protein                   | -0.19                                                                              | 0.67397 | 2.46                                                                                | 0.30328 | 0.33                                                                                | 0.49708 |
| STM1270         | yeaS       | putative transport protein                   | -0.29                                                                              | 0.56553 | -0.25                                                                               | 0.40398 | -0.65                                                                               | 0.12855 |
| STM1271         | yeaR       | putative cytoplasmic protein                 | -0.52                                                                              | 0.29183 | 2.31                                                                                | 0.00020 | -0.07                                                                               | 0.94774 |
| STM1271         | yeaR       | putative cytoplasmic protein                 | 0.28                                                                               | 0.81117 | 2.49                                                                                | 0.00018 | -0.96                                                                               | 0.05455 |
| STM1273         | STM1273    | putative nitric oxide reductase              | 1.25                                                                               | 0.03752 | -0.21                                                                               | 0.54976 | -0.13                                                                               | 0.83398 |
| STM1273         | STM1273    | putative nitric oxide reductase              | 2.31                                                                               | 0.01691 | -0.56                                                                               | 0.07259 | 2.08                                                                                | 0.01456 |
| STM1273,1n      | STM1273,1n | hypothetical protein STM1273,1n              | -0.76                                                                              | 0.11322 | 1.05                                                                                | 0.00892 | -0.65                                                                               | 0.16648 |
| STM1273,1n      | STM1273,1n | hypothetical protein STM1273,1n              | -0.49                                                                              | 0.50359 | 1.25                                                                                | 0.00682 | 0.49                                                                                | 0.21359 |
| STM1274         | yeaQ       | putative inner membrane protein              | 0.20                                                                               | 0.69024 | 2.90                                                                                | 0.00005 | 0.76                                                                                | 0.08879 |
| STM1274         | yeaQ       | putative inner membrane protein              | 1.09                                                                               | 0.36091 | 3.18                                                                                | 0.00009 | 1.56                                                                                | 0.01254 |
| STM1275         | yaoF       | putative hemolysin                           | 0.54                                                                               | 0.41455 | 0.47                                                                                | 0.18419 | 0.03                                                                                | 0.95374 |
| STM1275         | yaoF       | putative hemolysin                           | 1.64                                                                               | 0.02898 | 0.91                                                                                | 0.03200 | 0.80                                                                                | 0.07226 |
| STM1276         | STM1276    | putative periplasmic protein                 | 0.23                                                                               | 0.80825 | 1.19                                                                                | 0.00401 | -0.83                                                                               | 0.06642 |
| STM1276         | STM1276    | putative periplasmic protein                 | 0.97                                                                               | 0.05093 | 0.91                                                                                | 0.01386 | -0.38                                                                               | 0.33404 |
| STM1277         | yeaO       | putative cytoplasmic protein                 | -0.04                                                                              | 0.94519 | 1.43                                                                                | 0.00414 | -0.49                                                                               | 0.25715 |
| STM1277         | yeaO       | putative cytoplasmic protein                 | 1.21                                                                               | 0.03748 | 1.50                                                                                | 0.00190 | 0.85                                                                                | 0.07567 |
| STM1278         | yeaN       | putative amino acid/amine transport protein  | 0.18                                                                               | 0.71609 | 0.25                                                                                | 0.45135 | 0.48                                                                                | 0.52218 |
| STM1278         | yeaN       | putative amino acid/amine transport protein  | 1.01                                                                               | 0.08843 | 0.51                                                                                | 0.17619 | 1.05                                                                                | 0.20167 |
| STM1279         | yeaM       | putative regulatory protein                  | -0.23                                                                              | 0.58746 | 1.32                                                                                | 0.00325 | 0.31                                                                                | 0.41205 |
| STM1279         | yeaM       | putative regulatory protein                  | 0.22                                                                               | 0.63876 | 0.52                                                                                | 0.17681 | 0.53                                                                                | 0.37012 |
| STM1280         | yeaL       | putative inner membrane protein              | -0.53                                                                              | 0.55837 | -0.58                                                                               | 0.26544 | -0.11                                                                               | 0.87393 |
| STM1280         | yeaL       | putative inner membrane protein              | 0.95                                                                               | 0.13751 | 0.24                                                                                | 0.40613 | -0.06                                                                               | 0.90427 |
| STM1282         | yeaK       | putative cytoplasmic protein                 | 1.48                                                                               | 0.09689 | 0.01                                                                                | 0.98874 | 0.51                                                                                | 0.46393 |
| STM1282         | yeaK       | putative cytoplasmic protein                 | -0.33                                                                              | 0.75016 | -1.13                                                                               | 0.03001 | -2.09                                                                               | 0.00881 |
| STM1283         | yeaJ       | putative methyl-accepting chemotaxis protein | -0.16                                                                              | 0.83569 | 1.06                                                                                | 0.03559 | -0.87                                                                               | 0.09237 |
| STM1283         | yeaJ       | putative methyl-accepting chemotaxis protein | 0.56                                                                               | 0.27249 | 0.62                                                                                | 0.09599 | 0.53                                                                                | 0.22622 |
| STM1284         | yeaH       | hypothetical protein STM1284                 | 4.62                                                                               | 0.00758 | 3.65                                                                                | 0.00074 | 4.77                                                                                | 0.00004 |
| STM1284         | yeaH       | hypothetical protein STM1284                 | 5.57                                                                               | 0.00512 | 2.68                                                                                | 0.00196 | 2.57                                                                                | 0.00060 |
| STM1285         | yeaG       | putative serine protein kinase               | -0.04                                                                              | 0.94487 | 3.95                                                                                | 0.00014 | 3.06                                                                                | 0.00019 |
| STM1285         | yeaG       | putative serine protein kinase               | 1.59                                                                               | 0.02143 | 4.00                                                                                | 0.00001 | 3.58                                                                                | 0.00012 |
| STM1286         | mipA       | MitA-interacting protein A                   | -2.43                                                                              | 0.00613 | 1.10                                                                                | 0.01222 | -2.65                                                                               | 0.00077 |
| STM1286         | mipA       | MitA-interacting protein A                   | -1.41                                                                              | 0.02499 | 1.40                                                                                | 0.00529 | -2.70                                                                               | 0.00018 |
| STM1287         | STM1287    | arylsulfatase regulator                      | -0.35                                                                              | 0.56391 | 0.48                                                                                | 0.18265 | 1.16                                                                                | 0.06180 |
| STM1287         | STM1287    | arylsulfatase regulator                      | -0.65                                                                              | 0.33297 | -0.48                                                                               | 0.12496 | -0.21                                                                               | 0.87206 |
| STM1288         | STM1288    | putative aldehyde reductase                  | -1.28                                                                              | 0.05655 | -0.13                                                                               | 0.68812 | 0.41                                                                                | 0.62353 |
| STM1288         | STM1288    | putative aldehyde reductase                  | -0.63                                                                              | 0.17499 | -0.91                                                                               | 0.01800 | -0.59                                                                               | 0.15139 |
| STM1289         | yeaD       | aldose 1-epimerase                           | -1.59                                                                              | 0.01491 | -0.53                                                                               | 0.13731 | -1.58                                                                               | 0.00554 |
| STM1289         | yeaD       | aldose 1-epimerase                           | -1.49                                                                              | 0.06005 | -0.43                                                                               | 0.18641 | -1.50                                                                               | 0.00744 |
| STM1290         | gapA       | glyceraldehyde-3-phosphate dehydrogenase     | -0.48                                                                              | 0.74592 | -0.99                                                                               | 0.08487 | -1.60                                                                               | 0.03770 |
| STM1290         | gapA       | glyceraldehyde-3-phosphate dehydrogenase     | -1.99                                                                              | 0.01630 | -0.57                                                                               | 0.17197 | -1.69                                                                               | 0.00461 |
| STM1291         | yeaA       | methionine sulfoxide reductase B             | -2.35                                                                              | 0.01394 | 0.03                                                                                | 0.93728 | -1.03                                                                               | 0.02939 |
| STM1291         | yeaA       | methionine sulfoxide reductase B             | -0.72                                                                              | 0.12226 | 0.22                                                                                | 0.58424 | -0.47                                                                               | 0.26460 |
| STM1292         | yeaC       | putative cytoplasmic protein                 | -1.01                                                                              | 0.04885 | -0.12                                                                               | 0.69795 | -1.00                                                                               | 0.04087 |
| STM1292         | yeaC       | putative cytoplasmic protein                 | -0.51                                                                              | 0.46682 | -0.08                                                                               | 0.80873 | -0.25                                                                               | 0.62270 |
| STM1293         | pncA       | nicotinamidase/pyrazinamidase                | -0.58                                                                              | 0.32769 | -1.21                                                                               | 0.00518 | -1.49                                                                               | 0.00395 |
| STM1293         | pncA       | nicotinamidase/pyrazinamidase                | 0.07                                                                               | 0.88427 | -1.37                                                                               | 0.00125 | -0.71                                                                               | 0.09115 |
| STM1294         | ansA       | cytoplasmic asparaginase I                   | -2.88                                                                              | 0.01725 | -1.38                                                                               | 0.00255 | -2.48                                                                               | 0.00033 |
| STM1294         | ansA       | cytoplasmic asparaginase I                   | -0.41                                                                              | 0.33309 | -1.28                                                                               | 0.00185 | -1.42                                                                               | 0.00753 |
| STM1295         | sppA       | protease IV                                  | -2.16                                                                              | 0.00747 | -1.36                                                                               | 0.00536 | -2.78                                                                               | 0.00019 |
| STM1295         | sppA       | protease IV                                  | -1.65                                                                              | 0.02087 | -1.15                                                                               | 0.00892 | -2.52                                                                               | 0.00027 |
| STM1296         | ydjA       | putative oxidoreductase                      | -0.65                                                                              | 0.17908 | -0.35                                                                               | 0.27249 | -1.55                                                                               | 0.00588 |
| STM1296         | ydjA       | putative oxidoreductase                      | -0.16                                                                              | 0.68653 | -0.51                                                                               | 0.16615 | -0.53                                                                               | 0.16114 |
| STM1297         | selD       | selenophosphate synthetase                   | 2.56                                                                               | 0.00678 | -1.27                                                                               | 0.00437 | -1.74                                                                               | 0.00788 |
| STM1297         | selD       | selenophosphate synthetase                   | 2.99                                                                               | 0.00541 | -1.71                                                                               | 0.00160 | -1.25                                                                               | 0.01145 |
| STM1298         | topB       | DNA topoisomerase III                        | 0.96                                                                               | 0.13716 | -0.67                                                                               | 0.04596 | 1.34                                                                                | 0.06126 |
| STM1298         | topB       | DNA topoisomerase III                        | 1.59                                                                               | 0.01941 | 0.21                                                                                | 0.46212 | 1.46                                                                                | 0.01775 |

**Table S2.** Genome-wide expression of *Salmonella enterica* serovar Typhimurium inside fibroblasts

Intracellular WT 24 h p.i.      Intracellular *phoP* 24 h p.i.      Extracellular WT stationary phase

Relative to WT exponential LB      Relative to *phoP* exponential LB      Relative to WT exponential LB



| Systematic name | Gene    | Product                                         | log2Ratio (M) | p value | log2Ratio (M) | p value | log2Ratio (M) | p value |
|-----------------|---------|-------------------------------------------------|---------------|---------|---------------|---------|---------------|---------|
| STM1299         | gdhA    | glutamate dehydrogenase                         | -1.16         | 0.04125 | 0.73          | 0.09836 | -0.97         | 0.02288 |
| STM1299         | gdhA    | glutamate dehydrogenase                         | 0.37          | 0.64897 | 0.22          | 0.44084 | -1.13         | 0.02352 |
| STM1300         | STM1300 | putative periplasmic protein                    | 0.68          | 0.22375 | -0.54         | 0.07852 | -0.98         | 0.09479 |
| STM1300         | STM1300 | putative periplasmic protein                    | -0.48         | 0.37311 | -0.79         | 0.03205 | 0.20          | 0.59738 |
| STM1301         | STM1301 | putative mutator protein                        | -1.41         | 0.03236 | -0.61         | 0.05292 | -0.57         | 0.14728 |
| STM1301         | STM1301 | putative mutator protein                        | -1.25         | 0.08231 | -0.84         | 0.01844 | -1.12         | 0.04150 |
| STM1302         | xthA    | exonuclease III                                 | -0.92         | 0.14798 | 0.03          | 0.94859 | -1.22         | 0.01918 |
| STM1302         | xthA    | exonuclease III                                 | 0.02          | 0.97915 | 0.30          | 0.33309 | -0.44         | 0.33425 |
| STM1303         | argD    | bifunctional                                    | -0.21         | 0.63449 | 1.52          | 0.00793 | 1.63          | 0.01201 |
| STM1303         | argD    | bifunctional                                    | -0.63         | 0.46283 | 0.69          | 0.06467 | 0.66          | 0.19531 |
| STM1304         | astA    | arginine succinyltransferase                    | -0.51         | 0.41169 | 2.21          | 0.00085 | 1.67          | 0.00216 |
| STM1304         | astA    | arginine succinyltransferase                    | 0.29          | 0.52381 | 2.35          | 0.00045 | 2.74          | 0.00041 |
| STM1305         | astD    | aldehyde dehydrogenase                          | -0.10         | 0.90813 | 1.71          | 0.00046 | 3.02          | 0.00801 |
| STM1305         | astD    | aldehyde dehydrogenase                          | 0.97          | 0.05140 | 2.72          | 0.00087 | 2.47          | 0.00024 |
| STM1306         | astB    | succinylarginine dihydrolase                    | -0.49         | 0.45562 | 1.42          | 0.00152 | 1.13          | 0.02535 |
| STM1306         | astB    | succinylarginine dihydrolase                    | 0.68          | 0.43401 | 0.82          | 0.03531 | 1.40          | 0.01341 |
| STM1307         | astE    | succinylglutamate desuccinylase                 | -0.79         | 0.10350 | 0.75          | 0.06199 | 0.01          | 0.97072 |
| STM1307         | astE    | succinylglutamate desuccinylase                 | -0.16         | 0.74222 | -0.28         | 0.40611 | 0.97          | 0.02706 |
| STM1308         | spy     | putative stress response protein                | -0.20         | 0.76637 | 1.23          | 0.01697 | 3.65          | 0.00033 |
| STM1308         | spy     | putative stress response protein                | 1.72          | 0.05543 | 1.31          | 0.00600 | 4.32          | 0.00004 |
| STM1309         | STM1309 | putative excinuclease subunit                   | 1.51          | 0.02219 | 1.04          | 0.00867 | 2.02          | 0.00077 |
| STM1309         | STM1309 | putative excinuclease subunit                   | 0.81          | 0.09959 | 0.91          | 0.00929 | 2.42          | 0.00078 |
| STM1310         | nadE    | NAD(+) synthetase                               | -0.85         | 0.09059 | 2.04          | 0.00037 | 2.62          | 0.00928 |
| STM1310         | nadE    | NAD(+) synthetase                               | 0.36          | 0.53333 | 1.55          | 0.00173 | 2.37          | 0.00032 |
| STM1311         | osmE    | transcriptional activator                       | -0.41         | 0.33257 | 3.21          | 0.00006 | 4.96          | 0.00002 |
| STM1311         | osmE    | transcriptional activator                       | 1.04          | 0.29367 | 2.66          | 0.00044 | 5.76          | 0.00002 |
| STM1312         | celA    | sugar-specific enzyme IIB                       | -0.08         | 0.89868 | -0.18         | 0.88334 | 1.60          | 0.00265 |
| STM1312         | celA    | sugar-specific enzyme IIB                       | 0.53          | 0.30358 | 0.06          | 0.84086 | 1.35          | 0.00976 |
| STM1313         | celB    | sugar-specific enzyme II                        | 2.47          | 0.00778 | 2.00          | 0.00024 | 4.19          | 0.00003 |
| STM1313         | celB    | sugar-specific enzyme II                        | 3.03          | 0.00719 | 1.15          | 0.01669 | 4.89          | 0.00007 |
| STM1314         | celC    | sugar-specific enzyme III                       | -0.23         | 0.75846 | 1.67          | 0.00097 | 1.53          | 0.00567 |
| STM1314         | celC    | sugar-specific enzyme III                       | 0.09          | 0.84243 | 1.64          | 0.00240 | 2.31          | 0.01217 |
| STM1315         | celD    | transcriptional repressor of cel operon         | -0.54         | 0.40174 | 0.47          | 0.18164 | 0.47          | 0.60915 |
| STM1315         | celD    | transcriptional repressor of cel operon         | 0.55          | 0.28227 | 0.73          | 0.03575 | 0.20          | 0.85369 |
| STM1316         | celF    | phospho-beta-glucosidase/cellobiose-6-phosphate | -1.09         | 0.09627 | 1.84          | 0.00044 | -0.28         | 0.54985 |
| STM1316         | celF    | phospho-beta-glucosidase/cellobiose-6-phosphate | 0.48          | 0.44127 | 1.44          | 0.00269 | 0.50          | 0.18738 |
| STM1317         | celG    | hypothetical protein STM1317                    | 0.07          | 0.88576 | 1.64          | 0.00146 | 2.74          | 0.01190 |
| STM1317         | celG    | hypothetical protein STM1317                    | 0.84          | 0.40835 | 1.37          | 0.00199 | 2.39          | 0.00095 |
| STM1318         | katE    | hydroperoxidase HP11                            | 0.23          | 0.75196 | 0.81          | 0.03290 | 2.11          | 0.00300 |
| STM1318         | katE    | hydroperoxidase HP11                            | 1.48          | 0.08594 | 0.36          | 0.40818 | 3.11          | 0.00156 |
| STM1319         | cedA    | cell division modulator protein                 | -0.13         | 0.80322 | 0.12          | 0.73906 | 0.66          | 0.10370 |
| STM1319         | cedA    | cell division modulator protein                 | 0.46          | 0.44109 | 0.86          | 0.02231 | 1.12          | 0.02781 |
| STM1320         | ydjN    | kinase/transporter-like protein                 | -0.94         | 0.07992 | 0.36          | 0.29674 | -0.30         | 0.52459 |
| STM1320         | ydjN    | kinase/transporter-like protein                 | 0.25          | 0.57393 | 0.91          | 0.02585 | 0.15          | 0.69838 |
| STM1321         | ydjM    | putative SOS response protein                   | -0.44         | 0.32454 | 0.06          | 0.88799 | 0.10          | 0.79881 |
| STM1321         | ydjM    | putative SOS response protein                   | 0.06          | 0.94424 | -0.58         | 0.24066 | 0.35          | 0.39676 |
| STM1322         | yniC    | putative enzyme                                 | 0.23          | 0.77906 | 0.22          | 0.45541 | -0.99         | 0.02569 |
| STM1322         | yniC    | putative enzyme                                 | 0.21          | 0.63940 | 0.04          | 0.88839 | -0.19         | 0.66318 |
| STM1323         | yniB    | putative regulatory protein                     | -1.13         | 0.04277 | 0.26          | 0.34173 | -0.13         | 0.73110 |
| STM1323         | yniB    | putative regulatory protein                     | -0.83         | 0.22043 | 0.57          | 0.09708 | 0.44          | 0.23649 |
| STM1324         | STM1324 | putative cytoplasmic protein                    | -1.27         | 0.03916 | 1.14          | 0.01899 | 0.85          | 0.05880 |
| STM1324         | STM1324 | putative cytoplasmic protein                    | 0.79          | 0.11724 | 1.55          | 0.00592 | 1.39          | 0.00394 |
| STM1325         | ydiZ    | putative cytoplasmic protein                    | -0.41         | 0.45317 | 1.76          | 0.00084 | 1.01          | 0.02212 |
| STM1325         | ydiZ    | putative cytoplasmic protein                    | 0.67          | 0.14582 | 1.86          | 0.00074 | 1.89          | 0.00243 |
| STM1326         | pfkB    | 6-phosphofructokinase II                        | -0.06         | 0.92235 | 2.05          | 0.00027 | 2.69          | 0.00071 |
| STM1326         | pfkB    | 6-phosphofructokinase II                        | -0.37         | 0.41466 | 2.76          | 0.00018 | 2.92          | 0.00018 |
| STM1327         | ydiY    | putative outer membrane protein                 | -1.49         | 0.04399 | -1.27         | 0.00495 | -0.91         | 0.06535 |
| STM1327         | ydiY    | putative outer membrane protein                 | -1.29         | 0.09096 | -1.71         | 0.00067 | -1.31         | 0.00650 |
| STM1328         | STM1328 | putative outer membrane protein                 | -0.83         | 0.17600 | -1.48         | 0.00540 | -0.96         | 0.03813 |
| STM1328         | STM1328 | putative outer membrane protein                 | -0.09         | 0.93333 | -1.35         | 0.00478 | -0.37         | 0.66335 |
| STM1329         | STM1329 | putative inner membrane protein                 | 3.72          | 0.00512 | 1.86          | 0.00876 | 4.20          | 0.00016 |
| STM1329         | STM1329 | putative inner membrane protein                 | 2.18          | 0.02367 | 0.92          | 0.11191 | 2.77          | 0.00062 |
| STM1330         | STM1330 | putative DNA/RNA non-specific endonuclease      | 0.15          | 0.73344 | -0.25         | 0.41172 | 0.47          | 0.31263 |
| STM1330         | STM1330 | putative DNA/RNA non-specific endonuclease      | 1.15          | 0.03471 | -1.20         | 0.00510 | 0.24          | 0.63196 |
| STM1332         | rfc     | O-antigen polymerase                            | -1.12         | 0.13497 | 0.21          | 0.63706 | -0.47         | 0.29041 |
| STM1332         | rfc     | O-antigen polymerase                            | -0.76         | 0.12247 | -0.57         | 0.34338 | 0.20          | 0.67059 |
| STM1333         | thrS    | threonyl-tRNA synthetase                        | -2.47         | 0.02031 | -0.13         | 0.73357 | -3.38         | 0.00011 |
| STM1333         | thrS    | threonyl-tRNA synthetase                        | -1.77         | 0.02953 | -0.06         | 0.86842 | -3.05         | 0.00011 |
| STM1334,c       | infC    | translation initiation factor IF-3              | -2.87         | 0.01523 | 0.40          | 0.18356 | -4.84         | 0.00005 |
| STM1334,c       | infC    | translation initiation factor IF-3              | -2.53         | 0.00869 | 0.62          | 0.06483 | -4.40         | 0.00009 |

**Table S2.** Genome-wide expression of *Salmonella enterica* serovar Typhimurium inside fibroblasts

|                 |         |                                                       | Intracellular WT<br>24 h p.i.                                                      |         | Intracellular <i>phoP</i><br>24 h p.i.                                              |         | Extracellular WT<br>stationary phase                                                |         |
|-----------------|---------|-------------------------------------------------------|------------------------------------------------------------------------------------|---------|-------------------------------------------------------------------------------------|---------|-------------------------------------------------------------------------------------|---------|
|                 |         |                                                       | Relative to WT<br>exponential LB                                                   |         | Relative to <i>phoP</i><br>exponential LB                                           |         | Relative to WT<br>exponential LB                                                    |         |
|                 |         |                                                       |  |         |  |         |  |         |
| Systematic name | Gene    | Product                                               | log2Ratio (M)                                                                      | p value | log2Ratio (M)                                                                       | p value | log2Ratio (M)                                                                       | p value |
| STM1335         | rpml    | 50S ribosomal protein L35                             | -2.50                                                                              | 0.00876 | 0.48                                                                                | 0.14609 | -4.50                                                                               | 0.00004 |
| STM1335         | rpml    | 50S ribosomal protein L35                             | -1.38                                                                              | 0.05591 | 0.83                                                                                | 0.03619 | -4.36                                                                               | 0.00006 |
| STM1336         | rplT    | 50S ribosomal protein L20                             | -2.92                                                                              | 0.00577 | -1.95                                                                               | 0.14971 | -4.09                                                                               | 0.00003 |
| STM1336         | rplT    | 50S ribosomal protein L20                             | -0.99                                                                              | 0.46276 | -0.03                                                                               | 0.94723 | -3.81                                                                               | 0.00009 |
| STM1337         | pheS    | phenylalanyl-tRNA synthetase alpha subunit            | -2.05                                                                              | 0.01357 | -1.49                                                                               | 0.00229 | -2.89                                                                               | 0.00011 |
| STM1337         | pheS    | phenylalanyl-tRNA synthetase alpha subunit            | -1.82                                                                              | 0.01079 | -1.54                                                                               | 0.01870 | -2.72                                                                               | 0.00083 |
| STM1338         | pheT    | phenylalanyl-tRNA synthetase beta subunit             | -1.78                                                                              | 0.01725 | 0.23                                                                                | 0.44994 | -0.37                                                                               | 0.29127 |
| STM1338         | pheT    | phenylalanyl-tRNA synthetase beta subunit             | -0.79                                                                              | 0.09281 | 0.50                                                                                | 0.10840 | 0.31                                                                                | 0.48258 |
| STM1339         | himA    | integration host factor alpha subunit                 | -1.69                                                                              | 0.02654 | 0.70                                                                                | 0.09666 | 0.28                                                                                | 0.43791 |
| STM1339         | himA    | integration host factor alpha subunit                 | -0.49                                                                              | 0.34794 | 1.16                                                                                | 0.00710 | 0.97                                                                                | 0.03656 |
| STM1340         | btuC    | vitamin B12-transporter permease                      | -1.45                                                                              | 0.04561 | -0.95                                                                               | 0.04506 | -1.10                                                                               | 0.04524 |
| STM1340         | btuC    | vitamin B12-transporter permease                      | -0.70                                                                              | 0.21884 | -1.17                                                                               | 0.00359 | -0.88                                                                               | 0.02996 |
| STM1341         | btuE    | vitamin B12 transport protein                         | -0.97                                                                              | 0.14642 | 0.71                                                                                | 0.02453 | 0.69                                                                                | 0.07893 |
| STM1341         | btuE    | vitamin B12 transport protein                         | -0.36                                                                              | 0.42006 | 0.38                                                                                | 0.33083 | 2.07                                                                                | 0.00197 |
| STM1342         | btuD    | vitamin B12-transporter ATPase                        | -0.66                                                                              | 0.18601 | 0.55                                                                                | 0.10203 | 0.83                                                                                | 0.04076 |
| STM1342         | btuD    | vitamin B12-transporter ATPase                        | 0.68                                                                               | 0.29666 | 0.82                                                                                | 0.02978 | 1.31                                                                                | 0.03378 |
| STM1343         | nlpC    | lipoprotein                                           | -1.35                                                                              | 0.04799 | 0.89                                                                                | 0.01617 | -0.43                                                                               | 0.40552 |
| STM1343         | nlpC    | lipoprotein                                           | -0.07                                                                              | 0.87984 | 1.24                                                                                | 0.00467 | 0.19                                                                                | 0.73863 |
| STM1344         | ydiV    | hypothetical protein STM1344                          | -0.24                                                                              | 0.61730 | 0.17                                                                                | 0.69520 | 0.17                                                                                | 0.73154 |
| STM1344         | ydiV    | hypothetical protein STM1344                          | 0.45                                                                               | 0.35434 | -0.15                                                                               | 0.62643 | 1.05                                                                                | 0.05011 |
| STM1345         | ydiU    | hypothetical protein STM1345                          | 0.90                                                                               | 0.19914 | 1.63                                                                                | 0.00117 | 2.04                                                                                | 0.01105 |
| STM1345         | ydiU    | hypothetical protein STM1345                          | 1.22                                                                               | 0.08124 | 1.00                                                                                | 0.01547 | 1.55                                                                                | 0.00372 |
| STM1346         | ydiE    | putative cytoplasmic protein                          | 0.29                                                                               | 0.53066 | 1.28                                                                                | 0.00528 | -0.11                                                                               | 0.79461 |
| STM1346         | ydiE    | putative cytoplasmic protein                          | 2.12                                                                               | 0.04649 | 0.87                                                                                | 0.06217 | -0.48                                                                               | 0.18312 |
| STM1347         | aroH    | 3-deoxy-7-phosphoheptulonate synthase                 | -0.94                                                                              | 0.15487 | -0.20                                                                               | 0.46124 | -0.74                                                                               | 0.14217 |
| STM1347         | aroH    | 3-deoxy-7-phosphoheptulonate synthase                 | -0.89                                                                              | 0.17599 | -0.35                                                                               | 0.41361 | 0.05                                                                                | 0.90250 |
| STM1348         | ydiA    | hypothetical protein STM1348                          | -0.08                                                                              | 0.94487 | 1.24                                                                                | 0.00502 | -0.06                                                                               | 0.89746 |
| STM1348         | ydiA    | hypothetical protein STM1348                          | 0.09                                                                               | 0.90521 | 1.36                                                                                | 0.00839 | 0.34                                                                                | 0.51390 |
| STM1349         | pps     | phosphoenolpyruvate synthase                          | -0.55                                                                              | 0.47025 | 1.29                                                                                | 0.00467 | 0.05                                                                                | 0.91503 |
| STM1349         | pps     | phosphoenolpyruvate synthase                          | 0.58                                                                               | 0.18462 | 1.12                                                                                | 0.00536 | 1.06                                                                                | 0.02059 |
| STM1350         | ydiD    | hypothetical protein STM1350                          | 0.29                                                                               | 0.56943 | 1.04                                                                                | 0.02528 | -0.22                                                                               | 0.69105 |
| STM1350         | ydiD    | hypothetical protein STM1350                          | 2.88                                                                               | 0.03916 | 1.54                                                                                | 0.00213 | 0.44                                                                                | 0.53505 |
| STM1351         | ydiT    | putative ferredoxin                                   | 1.83                                                                               | 0.04414 | -0.41                                                                               | 0.30794 | 0.04                                                                                | 0.93297 |
| STM1351         | ydiT    | putative ferredoxin                                   | 3.63                                                                               | 0.00541 | -0.30                                                                               | 0.54822 | 1.68                                                                                | 0.03638 |
| STM1352         | ydiS    | flavoprotein                                          | -0.93                                                                              | 0.12963 | -0.16                                                                               | 0.76763 | -1.12                                                                               | 0.14679 |
| STM1352         | ydiS    | flavoprotein                                          | 0.13                                                                               | 0.77241 | -0.30                                                                               | 0.58742 | -1.39                                                                               | 0.25937 |
| STM1353         | ydiR    | putative electron transfer flavoprotein subunit alpha | 0.77                                                                               | 0.46748 | -1.11                                                                               | 0.19393 | -0.86                                                                               | 0.10643 |
| STM1353         | ydiR    | putative electron transfer flavoprotein subunit alpha | 1.56                                                                               | 0.05502 | -0.43                                                                               | 0.15039 | 0.56                                                                                | 0.27129 |
| STM1354         | ydiQ    | putative electron transfer flavoprotein subunit beta  | 1.42                                                                               | 0.02710 | 0.38                                                                                | 0.50156 | 0.39                                                                                | 0.47473 |
| STM1354         | ydiQ    | putative electron transfer flavoprotein subunit beta  | 2.78                                                                               | 0.00889 | 0.14                                                                                | 0.67477 | 1.44                                                                                | 0.02980 |
| STM1355         | ydiP    | putative transcriptional regulator                    | 0.28                                                                               | 0.52797 | 1.49                                                                                | 0.00610 | 0.94                                                                                | 0.01982 |
| STM1355         | ydiP    | putative transcriptional regulator                    | 0.63                                                                               | 0.21726 | -0.20                                                                               | 0.72129 | 0.04                                                                                | 0.92467 |
| STM1356         | ydiO    | crotonobetainyl-CoA dehydrogenase                     | -3.11                                                                              | 0.09819 | -1.81                                                                               | 0.04267 | -2.88                                                                               | 0.01767 |
| STM1356         | ydiO    | crotonobetainyl-CoA dehydrogenase                     | 0.03                                                                               | 0.97992 | -4.34                                                                               | 0.00003 | -2.83                                                                               | 0.01437 |
| STM1357,S       | ydiF    | putative acetyl-CoA/acetoacetyl-CoA transferase beta  | 0.01                                                                               | 0.99004 | 0.11                                                                                | 0.69823 | -0.91                                                                               | 0.13688 |
| STM1357,S       | ydiF    | putative acetyl-CoA/acetoacetyl-CoA transferase beta  | 0.00                                                                               | 0.99756 | -0.01                                                                               | 0.97270 | 0.85                                                                                | 0.13399 |
| STM1358         | aroD    | 3-dehydroquinate dehydratase                          | -1.00                                                                              | 0.05579 | 0.68                                                                                | 0.08222 | -1.25                                                                               | 0.16683 |
| STM1358         | aroD    | 3-dehydroquinate dehydratase                          | 1.44                                                                               | 0.12587 | 0.18                                                                                | 0.57535 | -0.15                                                                               | 0.84242 |
| STM1359         | aroE    | shikimate 5-dehydrogenase                             | 0.15                                                                               | 0.83879 | 0.48                                                                                | 0.17725 | -0.08                                                                               | 0.87763 |
| STM1359         | aroE    | shikimate 5-dehydrogenase                             | 2.28                                                                               | 0.10387 | 0.88                                                                                | 0.08673 | 0.68                                                                                | 0.44125 |
| STM1360         | ydiN    | putative transport protein                            | 1.56                                                                               | 0.14212 | -0.26                                                                               | 0.59389 | -0.20                                                                               | 0.63917 |
| STM1360         | ydiN    | putative transport protein                            | 1.78                                                                               | 0.02991 | -0.68                                                                               | 0.42724 | 0.46                                                                                | 0.30764 |
| STM1361         | ydiM    | putative transport protein                            | -0.68                                                                              | 0.17462 | -0.76                                                                               | 0.26309 | -0.75                                                                               | 0.12609 |
| STM1361         | ydiM    | putative transport protein                            | 1.71                                                                               | 0.01311 | -1.47                                                                               | 0.00222 | 0.75                                                                                | 0.09087 |
| STM1362         | ydiL    | putative cytoplasmic protein                          | 0.04                                                                               | 0.97228 | 0.81                                                                                | 0.07005 | 0.88                                                                                | 0.13931 |
| STM1362         | ydiL    | putative cytoplasmic protein                          | 1.12                                                                               | 0.13708 | 1.40                                                                                | 0.08418 | 1.23                                                                                | 0.02453 |
| STM1363         | rprA    | STM1363                                               | -0.73                                                                              | 0.18572 | 0.43                                                                                | 0.73152 | 1.31                                                                                | 0.01193 |
| STM1363         | rprA    | STM1363                                               | -0.29                                                                              | 0.48991 | 0.37                                                                                | 0.50325 | 0.62                                                                                | 0.11226 |
| STM1364         | ydiK    | putative permease                                     | 1.17                                                                               | 0.04037 | 0.73                                                                                | 0.03415 | 1.70                                                                                | 0.00512 |
| STM1364         | ydiK    | putative permease                                     | 2.28                                                                               | 0.00845 | 0.55                                                                                | 0.07624 | 2.31                                                                                | 0.00092 |
| STM1365         | ydiJ    | putative oxidase                                      | -1.64                                                                              | 0.03112 | 0.11                                                                                | 0.70924 | -1.19                                                                               | 0.02884 |
| STM1365         | ydiJ    | putative oxidase                                      | -1.09                                                                              | 0.05145 | -0.05                                                                               | 0.88331 | -0.39                                                                               | 0.64280 |
| STM1366         | STM1366 | hypothetical protein STM1366                          | -0.79                                                                              | 0.12349 | 0.38                                                                                | 0.27999 | -1.25                                                                               | 0.14240 |
| STM1366         | STM1366 | hypothetical protein STM1366                          | 0.18                                                                               | 0.80932 | 0.71                                                                                | 0.03128 | -0.27                                                                               | 0.46990 |
| STM1367         | ydiH    | putative cytoplasmic protein                          | 2.48                                                                               | 0.37169 | 1.29                                                                                | 0.00226 | 1.31                                                                                | 0.11674 |
| STM1367         | ydiH    | putative cytoplasmic protein                          | 0.12                                                                               | 0.89762 | 3.32                                                                                | 0.01399 | 0.85                                                                                | 0.51772 |
| STM1368         | STM1368 | putative Na+-dicarboxylate symporter                  | -0.38                                                                              | 0.55963 | -0.05                                                                               | 0.91173 | -0.60                                                                               | 0.19008 |
| STM1368         | STM1368 | putative Na+-dicarboxylate symporter                  | 0.06                                                                               | 0.90575 | -0.33                                                                               | 0.31309 | 0.09                                                                                | 0.87266 |
| STM1369         | sufA    | iron-sulfur cluster assembly scaffold protein         | 0.57                                                                               | 0.31260 | 4.77                                                                                | 0.00001 | 1.31                                                                                | 0.00449 |
| STM1369         | sufA    | iron-sulfur cluster assembly scaffold protein         | 1.39                                                                               | 0.03585 | 4.89                                                                                | 0.00001 | 2.05                                                                                | 0.00103 |

**Table S2.** Genome-wide expression of *Salmonella enterica* serovar Typhimurium inside fibroblasts

Intracellular WT 24 h p.i.      Intracellular *phoP* 24 h p.i.      Extracellular WT stationary phase

Relative to WT exponential LB      Relative to *phoP* exponential LB      Relative to WT exponential LB



| Systematic name | Gene   | Product                                      | log2Ratio (M) | p value | log2Ratio (M) | p value | log2Ratio (M) | p value |
|-----------------|--------|----------------------------------------------|---------------|---------|---------------|---------|---------------|---------|
| STM1370         | sufB   | putative ABC transporter protein             | -0.49         | 0.33903 | 3.26          | 0.00005 | 0.22          | 0.56077 |
| STM1370         | sufB   | putative ABC transporter protein             | 0.39          | 0.35181 | 4.89          | 0.00083 | 1.66          | 0.00357 |
| STM1371         | sufC   | putative transport protein                   | -0.50         | 0.42520 | 3.94          | 0.00001 | 0.97          | 0.08588 |
| STM1371         | sufC   | putative transport protein                   | 0.91          | 0.12491 | 4.31          | 0.00001 | 1.37          | 0.01082 |
| STM1372         | sufD   | cysteine desulfurase modulator               | -0.66         | 0.19374 | 3.01          | 0.00016 | 0.54          | 0.17932 |
| STM1372         | sufD   | cysteine desulfurase modulator               | -0.31         | 0.45525 | 3.60          | 0.00002 | 0.89          | 0.03952 |
| STM1373         | sufS   | selenocysteine lyase                         | 0.81          | 0.09298 | 4.57          | 0.00000 | 1.39          | 0.00954 |
| STM1373         | sufS   | selenocysteine lyase                         | 1.64          | 0.02109 | 4.50          | 0.00001 | 2.44          | 0.00208 |
| STM1374         | ynhA   | cysteine desulfuration protein SufE          | 0.28          | 0.78890 | 2.98          | 0.00006 | 0.82          | 0.06840 |
| STM1374         | ynhA   | cysteine desulfuration protein SufE          | 0.28          | 0.56699 | 3.06          | 0.00003 | 1.05          | 0.02387 |
| STM1375         | ynhG   | hypothetical protein STM1375                 | -1.73         | 0.01878 | -0.47         | 0.20601 | 0.14          | 0.73607 |
| STM1375         | ynhG   | hypothetical protein STM1375                 | -1.05         | 0.07388 | 0.21          | 0.54275 | 0.39          | 0.32036 |
| STM1376         | lppB   | putative methyl-accepting chemotaxis protein | -2.78         | 0.02659 | -2.17         | 0.00023 | -1.12         | 0.08642 |
| STM1376         | lppB   | putative methyl-accepting chemotaxis protein | -2.27         | 0.01417 | -1.68         | 0.00140 | -0.81         | 0.09541 |
| STM1377         | lpp    | murein lipoprotein                           | -3.96         | 0.00627 | -0.86         | 0.12941 | -2.54         | 0.00085 |
| STM1377         | lpp    | murein lipoprotein                           | -3.43         | 0.00541 | -0.98         | 0.02356 | -2.19         | 0.00059 |
| STM1378         | pykF   | pyruvate kinase                              | -3.38         | 0.00613 | -0.83         | 0.03403 | -1.50         | 0.00493 |
| STM1378         | pykF   | pyruvate kinase                              | -2.48         | 0.00778 | -0.47         | 0.11784 | -0.98         | 0.01884 |
| STM1379         | orf48  | putative amino acid permease                 | -0.91         | 0.25025 | -0.52         | 0.31257 | -0.13         | 0.78781 |
| STM1379         | orf48  | putative amino acid permease                 | 0.20          | 0.86605 | -1.37         | 0.00556 | -0.84         | 0.29650 |
| STM1380         | orf32  | putative proline iminopeptidase              | -0.41         | 0.37503 | -1.21         | 0.14355 | 1.03          | 0.12537 |
| STM1380         | orf32  | putative proline iminopeptidase              | -0.79         | 0.12063 | 0.09          | 0.81029 | -0.72         | 0.10580 |
| STM1381         | orf245 | putative cytoplasmic protein                 | 1.94          | 0.09625 | -0.49         | 0.42867 | 3.90          | 0.00025 |
| STM1381         | orf245 | putative cytoplasmic protein                 | 1.83          | 0.27822 | -0.14         | 0.71610 | 1.58          | 0.01819 |
| STM1382         | orf408 | putative regulatory protein                  | -0.90         | 0.08440 | 0.64          | 0.43604 | -0.40         | 0.60680 |
| STM1382         | orf408 | putative regulatory protein                  | -0.90         | 0.22468 | -0.52         | 0.20693 | 0.32          | 0.36301 |
| STM1383         | ttrA   | tetrathionate reductase complex subunit A    | -0.35         | 0.61544 | -1.54         | 0.04038 | -0.93         | 0.19406 |
| STM1383         | ttrA   | tetrathionate reductase complex subunit A    | 0.45          | 0.55942 | -1.36         | 0.00399 | -0.52         | 0.37373 |
| STM1384         | ttrC   | tetrathionate reductase complex subunit C    | 0.05          | 0.90910 | 0.30          | 0.32596 | 1.10          | 0.01942 |
| STM1384         | ttrC   | tetrathionate reductase complex subunit C    | 0.25          | 0.71361 | -0.55         | 0.43017 | 0.19          | 0.87319 |
| STM1385         | ttrB   | tetrathionate reductase complex subunit B    | -0.78         | 0.17300 | -0.33         | 0.63124 | 1.14          | 0.05316 |
| STM1385         | ttrB   | tetrathionate reductase complex subunit B    | 0.19          | 0.76190 | -1.26         | 0.00994 | 0.06          | 0.89137 |
| STM1386         | ttrS   | sensory histidine kinase                     | 0.69          | 0.36618 | 0.00          | 0.99977 | 0.37          | 0.64149 |
| STM1386         | ttrS   | sensory histidine kinase                     | -0.41         | 0.64683 | -1.27         | 0.03153 | -0.31         | 0.39613 |
| STM1387         | ttrR   | response regulator                           | -0.68         | 0.19975 | 0.79          | 0.02497 | 1.07          | 0.02411 |
| STM1387         | ttrR   | response regulator                           | 0.14          | 0.82161 | 1.03          | 0.01894 | 1.84          | 0.00213 |
| STM1388         | orf70  | putative cytoplasmic protein                 | -1.36         | 0.03420 | 0.61          | 0.09802 | 0.06          | 0.90284 |
| STM1388         | orf70  | putative cytoplasmic protein                 | -0.67         | 0.13712 | 0.24          | 0.48035 | 0.67          | 0.07723 |
| STM1389         | orf319 | putative inner membrane protein              | -0.30         | 0.78300 | 0.80          | 0.02321 | 1.77          | 0.00542 |
| STM1389         | orf319 | putative inner membrane protein              | -1.62         | 0.11017 | 0.89          | 0.06663 | 2.03          | 0.00744 |
| STM1390         | orf242 | putative regulatory protein                  | 0.03          | 0.95648 | 1.60          | 0.00249 | 0.45          | 0.35141 |
| STM1390         | orf242 | putative regulatory protein                  | 1.02          | 0.04702 | 1.16          | 0.01870 | 1.98          | 0.00186 |
| STM1391         | ssrB   | transcriptional activator                    | 1.13          | 0.11425 | 3.15          | 0.00020 | 0.33          | 0.65164 |
| STM1391         | ssrB   | transcriptional activator                    | 1.14          | 0.08076 | 3.76          | 0.00002 | -0.12         | 0.86177 |
| STM1392         | ssrA   | sensor kinase                                | 1.15          | 0.28308 | 1.90          | 0.00151 | 1.00          | 0.21279 |
| STM1392         | ssrA   | sensor kinase                                | 2.72          | 0.01686 | 1.31          | 0.03140 | 2.90          | 0.00688 |
| STM1394         | ssaC   | outer membrane secretin precursor            | 0.86          | 0.28849 | 5.69          | 0.00001 | 0.98          | 0.06077 |
| STM1394         | ssaC   | outer membrane secretin precursor            | 1.47          | 0.08825 | 5.86          | 0.00001 | 1.57          | 0.00516 |
| STM1395         | ssaD   | virulence protein                            | 1.26          | 0.11839 | 6.25          | 0.00000 | 0.84          | 0.33994 |
| STM1395         | ssaD   | virulence protein                            | 1.19          | 0.05754 | 7.17          | 0.00000 | 0.12          | 0.87683 |
| STM1396         | ssaE   | secretion system effector                    | 0.66          | 0.45642 | 7.15          | 0.00000 | 1.04          | 0.18380 |
| STM1396         | ssaE   | secretion system effector                    | 1.47          | 0.03584 | 6.48          | 0.00000 | 0.85          | 0.06779 |
| STM1398         | sseB   | translocation machinery component            | 2.89          | 0.01428 | 9.16          | 0.00000 | -0.12         | 0.84857 |
| STM1398         | sseB   | translocation machinery component            | 2.92          | 0.01580 | 8.63          | 0.00000 | -1.04         | 0.33661 |
| STM1399         | ssaA   | secretion system chaparone                   | 3.16          | 0.01072 | 9.45          | 0.00000 | 1.49          | 0.04008 |
| STM1399         | ssaA   | secretion system chaparone                   | 4.21          | 0.00512 | 8.99          | 0.00000 | 2.61          | 0.00201 |
| STM1400         | sseC   | translocation machinery component            | 1.21          | 0.07710 | 6.94          | 0.00000 | -0.48         | 0.51383 |
| STM1400         | sseC   | translocation machinery component            | 2.48          | 0.00686 | 7.51          | 0.00001 | 1.64          | 0.00444 |
| STM1401         | sseD   | translocation machinery component            | 1.98          | 0.01634 | 6.25          | 0.00000 | 0.13          | 0.90484 |
| STM1401         | sseD   | translocation machinery component            | 2.47          | 0.01424 | 7.06          | 0.00000 | 1.24          | 0.29438 |
| STM1402         | sseE   | secreted effector protein                    | 2.39          | 0.00776 | 7.54          | 0.00000 | 0.83          | 0.18923 |
| STM1402         | sseE   | secreted effector protein                    | 3.51          | 0.00546 | 6.56          | 0.00001 | 1.48          | 0.00887 |
| STM1403         | ssaB   | secretion system chaparone                   | 1.68          | 0.03822 | 5.56          | 0.00001 | 0.37          | 0.58493 |
| STM1403         | ssaB   | secretion system chaparone                   | 2.46          | 0.00727 | 5.64          | 0.00001 | 1.07          | 0.08950 |
| STM1404         | sseF   | secreted effector protein                    | -0.34         | 0.42972 | 3.70          | 0.00008 | -0.78         | 0.21389 |
| STM1404         | sseF   | secreted effector protein                    | 1.36          | 0.02148 | 3.60          | 0.00007 | 0.88          | 0.51138 |
| STM1405         | sseG   | secreted effector protein                    | -0.02         | 0.97778 | 3.41          | 0.00058 | 0.08          | 0.83418 |
| STM1405         | sseG   | secreted effector protein                    | 1.31          | 0.18196 | 3.76          | 0.00006 | 0.88          | 0.17308 |
| STM1406         | ssaG   | type III secretion system apparatus protein  | 1.44          | 0.03572 | 6.29          | 0.00000 | 0.21          | 0.60482 |
| STM1406         | ssaG   | type III secretion system apparatus protein  | 2.33          | 0.01595 | 6.49          | 0.00001 | 1.05          | 0.16484 |

**Table S2.** Genome-wide expression of *Salmonella enterica* serovar Typhimurium inside fibroblasts

Intracellular WT 24 h p.i.      Intracellular *phoP* 24 h p.i.      Extracellular WT stationary phase

Relative to WT exponential LB      Relative to *phoP* exponential LB      Relative to WT exponential LB



| Systematic name | Gene    | Product                                       | log2Ratio (M) | p value | log2Ratio (M) | p value | log2Ratio (M) | p value |
|-----------------|---------|-----------------------------------------------|---------------|---------|---------------|---------|---------------|---------|
| STM1407         | ssaH    | type III secretion system apparatus protein   | 0.81          | 0.18888 | 7.19          | 0.00000 | -0.93         | 0.11788 |
| STM1407         | ssaH    | type III secretion system apparatus protein   | 1.52          | 0.04437 | 7.53          | 0.00000 | -0.27         | 0.69196 |
| STM1408         | ssal    | type III secretion system apparatus protein   | 1.58          | 0.06552 | 8.44          | 0.00000 | -0.80         | 0.09562 |
| STM1408         | ssal    | type III secretion system apparatus protein   | 2.70          | 0.00845 | 7.85          | 0.00000 | 1.09          | 0.12342 |
| STM1409         | ssaJ    | needle complex inner membrane lipoprotein     | 1.40          | 0.10224 | 7.34          | 0.00000 | 0.18          | 0.75170 |
| STM1409         | ssaJ    | needle complex inner membrane lipoprotein     | 2.82          | 0.00566 | 7.63          | 0.00000 | 1.35          | 0.00805 |
| STM1410         | STM1410 | putative cytoplasmic protein                  | 1.65          | 0.32110 | 5.98          | 0.00001 | 1.22          | 0.06740 |
| STM1410         | STM1410 | putative cytoplasmic protein                  | 0.91          | 0.30790 | 6.04          | 0.00207 | -0.53         | 0.44620 |
| STM1411         | ssaK    | type III secretion system apparatus protein   | -0.33         | 0.61449 | 6.06          | 0.00001 | 0.71          | 0.15533 |
| STM1411         | ssaK    | type III secretion system apparatus protein   | 1.63          | 0.02124 | 6.84          | 0.00000 | 1.35          | 0.02821 |
| STM1412         | ssaL    | type III secretion system apparatus protein   | 1.16          | 0.04183 | 7.55          | 0.00000 | -0.55         | 0.54480 |
| STM1412         | ssaL    | type III secretion system apparatus protein   | 2.57          | 0.02000 | 7.48          | 0.00000 | -0.14         | 0.87683 |
| STM1413         | ssaM    | type III secretion system apparatus protein   | 1.04          | 0.08899 | 5.82          | 0.00000 | 2.04          | 0.00057 |
| STM1413         | ssaM    | type III secretion system apparatus protein   | 0.67          | 0.16275 | 6.11          | 0.00000 | 1.98          | 0.00138 |
| STM1414         | ssaV    | type III secretion system apparatus protein   | -0.22         | 0.82541 | 4.84          | 0.00002 | -1.00         | 0.29981 |
| STM1414         | ssaV    | type III secretion system apparatus protein   | 2.86          | 0.02908 | 5.74          | 0.00000 | 0.10          | 0.87781 |
| STM1415         | ssaN    | type III secretion system ATPase              | -0.47         | 0.44016 | 5.30          | 0.00000 | -1.14         | 0.12417 |
| STM1415         | ssaN    | type III secretion system ATPase              | 1.35          | 0.04999 | 6.13          | 0.00000 | 0.45          | 0.55236 |
| STM1416         | ssaO    | type III secretion system apparatus protein   | -0.37         | 0.52554 | 5.54          | 0.00001 | 0.60          | 0.13250 |
| STM1416         | ssaO    | type III secretion system apparatus protein   | -0.40         | 0.43816 | 5.76          | 0.00001 | 0.78          | 0.30262 |
| STM1417         | ssaP    | type III secretion system apparatus protein   | -0.74         | 0.21542 | 4.15          | 0.00007 | -0.19         | 0.74372 |
| STM1417         | ssaP    | type III secretion system apparatus protein   | 0.13          | 0.82672 | 4.33          | 0.00001 | -1.57         | 0.10194 |
| STM1418         | ssaQ    | type III secretion protein                    | -0.15         | 0.71442 | 5.16          | 0.00001 | -0.98         | 0.26312 |
| STM1418         | ssaQ    | type III secretion protein                    | 0.92          | 0.30734 | 5.18          | 0.00001 | 0.84          | 0.05181 |
| STM1419         | ssaR    | needle complex export protein                 | 2.59          | 0.12157 | 5.31          | 0.00001 | 0.95          | 0.18394 |
| STM1419         | ssaR    | needle complex export protein                 | 3.01          | 0.17156 | 5.57          | 0.00001 | 1.39          | 0.35185 |
| STM1421         | ssaT    | type III secretion system apparatus protein   | 0.68          | 0.38952 | 3.92          | 0.00002 | 0.79          | 0.34671 |
| STM1421         | ssaT    | type III secretion system apparatus protein   | 0.60          | 0.45331 | 4.22          | 0.00002 | 0.60          | 0.20802 |
| STM1422         | ssaU    | type III secretion system apparatus protein   | -1.39         | 0.05278 | 1.70          | 0.00170 | -0.55         | 0.20621 |
| STM1422         | ssaU    | type III secretion system apparatus protein   | -0.90         | 0.25983 | 1.67          | 0.00325 | 0.11          | 0.84838 |
| STM1423         | valW    | STM1423                                       | 0.33          | 0.52554 | -1.05         | 0.01963 | 0.23          | 0.62904 |
| STM1423         | valW    | STM1423                                       | 0.46          | 0.40701 | -0.67         | 0.18357 | 1.14          | 0.05041 |
| STM1424         | valV    | STM1424                                       | -0.87         | 0.25983 | -0.58         | 0.45914 | -0.39         | 0.57706 |
| STM1424         | valV    | STM1424                                       | -0.77         | 0.26216 | -0.76         | 0.05832 | -0.21         | 0.75098 |
| STM1425         | ydhE    | multidrug efflux protein NorA                 | -1.47         | 0.02080 | 0.33          | 0.28023 | -0.42         | 0.26434 |
| STM1425         | ydhE    | multidrug efflux protein NorA                 | -1.32         | 0.07431 | 0.23          | 0.45514 | -0.39         | 0.84249 |
| STM1426         | ribE    | riboflavin synthase subunit alpha             | -0.29         | 0.47428 | 0.03          | 0.92002 | -0.41         | 0.34527 |
| STM1426         | ribE    | riboflavin synthase subunit alpha             | 0.03          | 0.96815 | 0.29          | 0.46795 | 0.15          | 0.79610 |
| STM1427         | cfa     | cyclopropane fatty acyl phospholipid synthase | -0.29         | 0.66164 | 0.06          | 0.87217 | 0.84          | 0.03182 |
| STM1427         | cfa     | cyclopropane fatty acyl phospholipid synthase | -0.82         | 0.10156 | 0.59          | 0.06166 | 0.93          | 0.02509 |
| STM1428         | ydhC    | putative transport protein                    | -1.68         | 0.01894 | -1.12         | 0.00521 | -0.28         | 0.53219 |
| STM1428         | ydhC    | putative transport protein                    | 1.23          | 0.34362 | 0.00          | 0.99850 | 2.10          | 0.10743 |
| STM1429         | ydhB    | putative transcriptional regulator            | -0.65         | 0.22696 | -0.50         | 0.31693 | -0.53         | 0.40769 |
| STM1429         | ydhB    | putative transcriptional regulator            | -0.74         | 0.14685 | -0.26         | 0.51501 | -0.19         | 0.70707 |
| STM1430         | purR    | pur regulon transcriptional repressor         | -1.05         | 0.11951 | -0.57         | 0.06662 | -0.12         | 0.75912 |
| STM1430         | purR    | pur regulon transcriptional repressor         | -0.93         | 0.24529 | -0.19         | 0.50383 | -1.10         | 0.02175 |
| STM1431         | sodB    | superoxide dismutase                          | -0.77         | 0.10974 | -0.58         | 0.07986 | -1.98         | 0.00395 |
| STM1431         | sodB    | superoxide dismutase                          | -0.53         | 0.22279 | -0.62         | 0.10859 | -1.50         | 0.01003 |
| STM1432         | ydhO    | putative cell wall-associated hydrolase       | -0.62         | 0.32370 | -0.11         | 0.78795 | -1.99         | 0.00750 |
| STM1432         | ydhO    | putative cell wall-associated hydrolase       | 0.19          | 0.63316 | -0.09         | 0.81278 | -1.10         | 0.02077 |
| STM1433         | ydhD    | putative glutaredoxin protein                 | -1.61         | 0.08203 | -0.50         | 0.13788 | -1.64         | 0.02855 |
| STM1433         | ydhD    | putative glutaredoxin protein                 | 1.36          | 0.61146 | -0.77         | 0.03379 | -2.35         | 0.00360 |
| STM1434         | mnt     | ribonuclease T                                | -1.16         | 0.05312 | -0.72         | 0.02418 | -2.34         | 0.00419 |
| STM1434         | mnt     | ribonuclease T                                | -0.49         | 0.26894 | -0.27         | 0.36110 | -1.54         | 0.02284 |
| STM1435         | gloA    | glyoxalase I                                  | -0.64         | 0.16086 | 0.74          | 0.04507 | 0.03          | 0.93511 |
| STM1435         | gloA    | glyoxalase I                                  | -0.45         | 0.43816 | 0.48          | 0.20475 | 0.72          | 0.09560 |
| STM1436         | nemA    | N-ethylmaleimide reductase                    | -0.90         | 0.10477 | -0.44         | 0.17897 | -1.81         | 0.00271 |
| STM1436         | nemA    | N-ethylmaleimide reductase                    | -1.18         | 0.07418 | -1.06         | 0.01951 | -1.06         | 0.02181 |
| STM1437         | ydhM    | putative transcriptional repressor            | -2.34         | 0.00673 | -1.51         | 0.00301 | -1.11         | 0.01590 |
| STM1437         | ydhM    | putative transcriptional repressor            | -1.25         | 0.11484 | -1.58         | 0.00222 | -1.46         | 0.00500 |
| STM1438         | ydhL    | putative oxidoreductase                       | -1.79         | 0.02538 | 0.29          | 0.80561 | 0.74          | 0.06851 |
| STM1438         | ydhL    | putative oxidoreductase                       | 0.46          | 0.68087 | -0.56         | 0.11296 | -1.87         | 0.08222 |
| STM1439         | ydhF    | putative aldo/keto reductase                  | -1.66         | 0.04245 | -0.68         | 0.02724 | 0.47          | 0.24881 |
| STM1439         | ydhF    | putative aldo/keto reductase                  | -2.12         | 0.00757 | -0.74         | 0.04217 | -0.11         | 0.76981 |
| STM1440         | sodC    | copper/zinc superoxide dismutase              | -0.49         | 0.28018 | 0.95          | 0.02075 | 2.50          | 0.00090 |
| STM1440         | sodC    | copper/zinc superoxide dismutase              | -0.39         | 0.46700 | 1.33          | 0.00358 | 3.03          | 0.00047 |
| STM1441         | STM1441 | putative inner membrane protein               | -0.76         | 0.19443 | 2.41          | 0.00046 | 2.85          | 0.00018 |
| STM1441         | STM1441 | putative inner membrane protein               | -0.13         | 0.82222 | 2.58          | 0.00015 | 3.26          | 0.00010 |
| STM1442         | ydhJ    | putative multidrug resistance efflux pump     | -0.58         | 0.30358 | -0.57         | 0.13092 | -1.12         | 0.01116 |
| STM1442         | ydhJ    | putative multidrug resistance efflux pump     | -0.24         | 0.57902 | -1.22         | 0.00700 | -0.13         | 0.76211 |

**Table S2.** Genome-wide expression of *Salmonella enterica* serovar Typhimurium inside fibroblasts

Intracellular WT 24 h p.i.      Intracellular *phoP* 24 h p.i.      Extracellular WT stationary phase

Relative to WT exponential LB      Relative to *phoP* exponential LB      Relative to WT exponential LB



| Systematic name | Gene    | Product                                              | log2Ratio (M) | p value | log2Ratio (M) | p value | log2Ratio (M) | p value |
|-----------------|---------|------------------------------------------------------|---------------|---------|---------------|---------|---------------|---------|
| STM1444         | slyA    | transcriptional regulator SlyA                       | -0.53         | 0.41661 | 0.26          | 0.42635 | -0.29         | 0.42598 |
| STM1444         | slyA    | transcriptional regulator SlyA                       | -0.32         | 0.55908 | 0.47          | 0.13041 | -0.06         | 0.91445 |
| STM1445         | slyB    | putative outer membrane lipoprotein                  | -0.66         | 0.42811 | 0.91          | 0.02157 | 0.88          | 0.03622 |
| STM1445         | slyB    | putative outer membrane lipoprotein                  | -0.09         | 0.93129 | 0.60          | 0.06221 | 1.48          | 0.00236 |
| STM1446         | ydH     | putative cytoplasmic protein                         | -1.70         | 0.03047 | -0.30         | 0.49991 | -0.43         | 0.45192 |
| STM1446         | ydH     | putative cytoplasmic protein                         | -0.21         | 0.67685 | -0.38         | 0.61316 | 0.06          | 0.92298 |
| STM1447         | ydH     | putative outer membrane lipoprotein                  | -0.03         | 0.96020 | -0.30         | 0.28657 | -0.87         | 0.06475 |
| STM1447         | ydH     | putative outer membrane lipoprotein                  | -0.13         | 0.78367 | 0.13          | 0.68229 | -0.09         | 0.87084 |
| STM1448         | pdxH    | pyridoxamine 5'-phosphate oxidase                    | -2.79         | 0.00627 | -1.49         | 0.00091 | -2.93         | 0.00042 |
| STM1448         | pdxH    | pyridoxamine 5'-phosphate oxidase                    | -0.47         | 0.61745 | -1.15         | 0.00610 | -3.78         | 0.00018 |
| STM1449         | tyrS    | tyrosyl-tRNA synthetase                              | 0.79          | 0.63473 | -0.68         | 0.04262 | -1.31         | 0.00507 |
| STM1449         | tyrS    | tyrosyl-tRNA synthetase                              | 0.28          | 0.68617 | -1.03         | 0.00517 | -1.15         | 0.03917 |
| STM1450         | pdxY    | pyridoxine kinase                                    | 0.47          | 0.31499 | 0.12          | 0.69896 | -0.65         | 0.35949 |
| STM1450         | pdxY    | pyridoxine kinase                                    | 0.87          | 0.09801 | -0.30         | 0.27006 | -0.60         | 0.34818 |
| STM1451         | gst     | glutathione S-transferase                            | -0.80         | 0.09058 | 0.57          | 0.12559 | -0.90         | 0.05849 |
| STM1451         | gst     | glutathione S-transferase                            | -3.03         | 0.04587 | 1.13          | 0.00813 | -0.07         | 0.87159 |
| STM1452         | ydgR    | putative peptide transport protein                   | -0.21         | 0.64359 | 0.55          | 0.11054 | -1.93         | 0.00412 |
| STM1452         | ydgR    | putative peptide transport protein                   | 0.55          | 0.29302 | 0.38          | 0.26641 | -0.96         | 0.02045 |
| STM1453         | nth     | endonuclease III                                     | -0.79         | 0.28425 | -0.07         | 0.91278 | -0.01         | 0.98922 |
| STM1453         | nth     | endonuclease III                                     | -0.58         | 0.34358 | -1.23         | 0.00695 | -2.99         | 0.00257 |
| STM1454         | ydgQ    | NADH-ubiquinone oxidoreductase                       | -1.70         | 0.01467 | -0.36         | 0.25651 | -1.46         | 0.05894 |
| STM1454         | ydgQ    | NADH-ubiquinone oxidoreductase                       | -0.57         | 0.33377 | -1.13         | 0.00433 | -1.10         | 0.09600 |
| STM1455         | ydgP    | electron transport complex protein RnfG              | -0.03         | 0.94995 | -0.58         | 0.10407 | -1.38         | 0.00451 |
| STM1455         | ydgP    | electron transport complex protein RnfG              | 0.94          | 0.07241 | -0.54         | 0.10608 | -0.71         | 0.26973 |
| STM1456         | rnfD    | electron transport complex protein RnfD              | -1.35         | 0.05496 | -1.49         | 0.08128 | -1.40         | 0.03643 |
| STM1456         | rnfD    | electron transport complex protein RnfD              | -0.45         | 0.27113 | -1.07         | 0.01994 | -2.45         | 0.00027 |
| STM1457         | STM1457 | electron transport complex protein RnfC              | -0.76         | 0.13758 | -0.63         | 0.09013 | -1.97         | 0.00223 |
| STM1457         | STM1457 | electron transport complex protein RnfC              | -1.45         | 0.03015 | -0.84         | 0.01707 | -1.24         | 0.01522 |
| STM1458         | ydgM    | electron transport complex protein RnfB              | -1.75         | 0.01740 | -0.08         | 0.77559 | -1.52         | 0.17762 |
| STM1458         | ydgM    | electron transport complex protein RnfB              | -0.55         | 0.48181 | -0.15         | 0.69024 | -0.86         | 0.21737 |
| STM1459         | STM1459 | Na(+)-translocating NADH-quinone reductase subunit E | -1.57         | 0.01982 | -0.63         | 0.09908 | -1.62         | 0.04377 |
| STM1459         | STM1459 | Na(+)-translocating NADH-quinone reductase subunit E | -0.74         | 0.26629 | -0.33         | 0.33256 | -1.66         | 0.01837 |
| STM1460         | ydgK    | putative inner membrane protein                      | -1.05         | 0.21054 | 0.03          | 0.95356 | -1.51         | 0.03021 |
| STM1460         | ydgK    | putative inner membrane protein                      | -0.31         | 0.60292 | 0.27          | 0.51093 | -2.25         | 0.01328 |
| STM1461,S       | ydgT    | putative cytoplasmic protein                         | -1.20         | 0.03228 | -0.02         | 0.95179 | -1.96         | 0.00406 |
| STM1461,S       | ydgT    | putative cytoplasmic protein                         | -0.07         | 0.87330 | 0.22          | 0.43092 | -1.86         | 0.01473 |
| STM1462,S       | ydgJ    | putative oxidoreductase                              | -1.24         | 0.04260 | -0.01         | 0.98336 | -0.29         | 0.47996 |
| STM1462,S       | ydgJ    | putative oxidoreductase                              | 0.78          | 0.24861 | -0.17         | 0.56399 | -0.24         | 0.52137 |
| STM1463         | add     | adenosine deaminase                                  | -1.32         | 0.02344 | -0.41         | 0.30992 | -1.03         | 0.10508 |
| STM1463         | add     | adenosine deaminase                                  | -0.19         | 0.63124 | -0.43         | 0.27345 | -0.55         | 0.33884 |
| STM1466         | ydgA    | putative periplasmic protein                         | -2.30         | 0.00753 | -1.56         | 0.00086 | -1.08         | 0.02292 |
| STM1466         | ydgA    | putative periplasmic protein                         | -2.11         | 0.02070 | -1.49         | 0.00150 | -0.71         | 0.31251 |
| STM1467         | manA    | mannose-6-phosphate isomerase                        | -0.89         | 0.12290 | -1.55         | 0.00169 | -1.35         | 0.00585 |
| STM1467         | manA    | mannose-6-phosphate isomerase                        | -0.66         | 0.16839 | -1.13         | 0.01191 | -0.98         | 0.04561 |
| STM1468         | fumA    | fumarate hydratase                                   | -1.94         | 0.01028 | -0.28         | 0.38561 | -0.90         | 0.08894 |
| STM1468         | fumA    | fumarate hydratase                                   | -1.58         | 0.20668 | 0.03          | 0.93816 | -0.84         | 0.09820 |
| STM1469         | fumC    | fumarate hydratase                                   | 0.47          | 0.61733 | 0.76          | 0.03126 | 1.80          | 0.03915 |
| STM1469         | fumC    | fumarate hydratase                                   | 0.83          | 0.21671 | 0.99          | 0.05137 | 1.40          | 0.00732 |
| STM1470         | tus     | DNA replication terminus site-binding protein        | -0.41         | 0.41886 | 0.68          | 0.09170 | 1.21          | 0.02188 |
| STM1470         | tus     | DNA replication terminus site-binding protein        | -0.67         | 0.24318 | 0.68          | 0.05087 | 1.24          | 0.01376 |
| STM1471         | rstB    | sensory histidine kinase                             | -0.26         | 0.74562 | -0.97         | 0.02041 | -0.75         | 0.24340 |
| STM1471         | rstB    | sensory histidine kinase                             | 1.84          | 0.07008 | -1.67         | 0.00301 | 0.38          | 0.59894 |
| STM1472         | STM1472 | putative periplasmic protein                         | -1.84         | 0.10079 | -0.52         | 0.26988 | -0.02         | 0.96982 |
| STM1472         | STM1472 | putative periplasmic protein                         | -0.25         | 0.72148 | -0.03         | 0.95323 | 0.89          | 0.03121 |
| STM1473         | ompN    | outer membrane protein N precursor                   | -2.18         | 0.07451 | -1.84         | 0.00623 | -1.20         | 0.26322 |
| STM1473         | ompN    | outer membrane protein N precursor                   | -1.83         | 0.10628 | -2.10         | 0.00650 | -2.42         | 0.01510 |
| STM1475         | rstA    | response regulator                                   | -1.75         | 0.01217 | -0.86         | 0.01807 | -1.58         | 0.00554 |
| STM1475         | rstA    | response regulator                                   | -1.17         | 0.04102 | -0.93         | 0.01262 | -2.40         | 0.00058 |
| STM1476         | ydgC    | putative inner membrane protein                      | -1.16         | 0.03111 | -1.05         | 0.01654 | -1.09         | 0.09531 |
| STM1476         | ydgC    | putative inner membrane protein                      | 0.34          | 0.51716 | -1.08         | 0.04089 | -0.53         | 0.19903 |
| STM1477         | ydgl    | putative amino acid transporter                      | -0.59         | 0.33321 | -0.70         | 0.13969 | -0.03         | 0.94551 |
| STM1477         | ydgl    | putative amino acid transporter                      | 0.63          | 0.26164 | -1.11         | 0.01547 | -0.46         | 0.22307 |
| STM1478         | ydgH    | putative periplasmic protein                         | -3.13         | 0.00778 | -1.43         | 0.00145 | -2.56         | 0.00094 |
| STM1478         | ydgH    | putative periplasmic protein                         | -1.73         | 0.07314 | -1.47         | 0.00190 | -3.29         | 0.00026 |
| STM1479         | pntA    | NAD(P) transhydrogenase subunit alpha                | -2.02         | 0.01146 | -0.37         | 0.46994 | -1.52         | 0.00254 |
| STM1479         | pntA    | NAD(P) transhydrogenase subunit alpha                | -1.65         | 0.02339 | -0.89         | 0.02204 | -1.40         | 0.01876 |
| STM1480         | pntB    | pyridine nucleotide transhydrogenase                 | -1.21         | 0.13754 | 0.15          | 0.65688 | -0.52         | 0.15139 |
| STM1480         | pntB    | pyridine nucleotide transhydrogenase                 | -0.81         | 0.19313 | -0.23         | 0.52151 | -0.05         | 0.93414 |
| STM1481         | STM1481 | putative transport protein                           | 0.18          | 0.65232 | 0.40          | 0.36312 | -1.13         | 0.07707 |
| STM1481         | STM1481 | putative transport protein                           | 0.45          | 0.39805 | 0.12          | 0.69904 | -0.38         | 0.49775 |

**Table S2.** Genome-wide expression of *Salmonella enterica* serovar Typhimurium inside fibroblasts

Intracellular WT 24 h p.i.      Intracellular *phoP* 24 h p.i.      Extracellular WT stationary phase

Relative to WT exponential LB      Relative to *phoP* exponential LB      Relative to WT exponential LB

| Systematic name | Gene    | Product                                               | log2Ratio (M) | p value | log2Ratio (M) | p value | log2Ratio (M) | p value |
|-----------------|---------|-------------------------------------------------------|---------------|---------|---------------|---------|---------------|---------|
| STM1482         | ydgF    | putative cationic transporter                         | -0.41         | 0.56254 | 0.63          | 0.12500 | 0.16          | 0.77436 |
| STM1482         | ydgF    | putative cationic transporter                         | -0.11         | 0.84760 | 0.10          | 0.75143 | 0.54          | 0.23194 |
| STM1483         | ydgE    | putative cationic transporter                         | -0.86         | 0.15118 | 1.09          | 0.03021 | -0.34         | 0.54263 |
| STM1483         | ydgE    | putative cationic transporter                         | 0.27          | 0.69063 | 0.63          | 0.09080 | -0.74         | 0.12609 |
| STM1484         | STM1484 | putative protease                                     | 0.14          | 0.78379 | 0.32          | 0.48171 | 0.33          | 0.36724 |
| STM1484         | STM1484 | putative protease                                     | -0.45         | 0.43508 | -0.06         | 0.88944 | -1.58         | 0.00328 |
| STM1486         | ynfM    | putative transport protein                            | 0.41          | 0.50483 | -0.89         | 0.03061 | 1.61          | 0.00539 |
| STM1486         | ynfM    | putative transport protein                            | 2.72          | 0.14463 | -1.12         | 0.07138 | 2.41          | 0.00024 |
| STM1487         | ynfL    | putative transcriptional regulator                    | -0.44         | 0.46239 | 0.05          | 0.93083 | 0.32          | 0.48128 |
| STM1487         | ynfL    | putative transcriptional regulator                    | 0.86          | 0.08266 | 0.22          | 0.45674 | 2.39          | 0.00033 |
| STM1488         | mlc     | pts operon transcriptional repressor                  | -0.33         | 0.63291 | 0.05          | 0.89030 | -0.64         | 0.12410 |
| STM1488         | mlc     | pts operon transcriptional repressor                  | -0.61         | 0.56239 | -1.23         | 0.02289 | -1.32         | 0.00922 |
| STM1489         | bioD    | dithiobiotin synthetase                               | -0.90         | 0.08416 | -0.31         | 0.47398 | 0.72          | 0.49222 |
| STM1489         | bioD    | dithiobiotin synthetase                               | 0.10          | 0.83951 | -0.03         | 0.92361 | 0.57          | 0.19111 |
| STM1490         | STM1490 | putative voltage-gated ClC-type chloride channel ClcB | 0.26          | 0.52154 | 0.34          | 0.34555 | 0.51          | 0.41186 |
| STM1490         | STM1490 | putative voltage-gated ClC-type chloride channel ClcB | 0.62          | 0.21597 | 0.07          | 0.86096 | 1.07          | 0.05049 |
| STM1491         | STM1491 | proline/glycine betaine transport systems             | 0.11          | 0.86966 | 0.88          | 0.02239 | 0.61          | 0.16687 |
| STM1491         | STM1491 | proline/glycine betaine transport systems             | 0.19          | 0.76187 | 0.01          | 0.98144 | 0.72          | 0.12430 |
| STM1492         | STM1492 | putative ABC transporter permease component           | 0.16          | 0.78750 | 0.53          | 0.25302 | 0.99          | 0.05715 |
| STM1492         | STM1492 | putative ABC transporter permease component           | -0.43         | 0.39937 | 0.40          | 0.18483 | 1.28          | 0.07454 |
| STM1493         | STM1493 | putative ABC transporter periplasmic component        | 0.72          | 0.16697 | 1.24          | 0.01108 | 1.83          | 0.00257 |
| STM1493         | STM1493 | putative ABC transporter periplasmic component        | 1.21          | 0.10897 | 0.58          | 0.21848 | 2.43          | 0.00024 |
| STM1494         | STM1494 | putative transport system permease component          | -0.19         | 0.72634 | 1.01          | 0.02096 | 0.94          | 0.03519 |
| STM1494         | STM1494 | putative transport system permease component          | 0.38          | 0.39345 | 0.58          | 0.34288 | 1.54          | 0.01236 |
| STM1495         | ynfI    | putative anaerobic dehydrogenase component            | -0.70         | 0.35232 | 0.07          | 0.85557 | 0.80          | 0.16547 |
| STM1495         | ynfI    | putative anaerobic dehydrogenase component            | -0.73         | 0.15588 | 0.61          | 0.12328 | -0.64         | 0.25218 |
| STM1496         | STM1496 | putative dimethylsulfoxide reductase                  | -0.75         | 0.13717 | 0.16          | 0.70261 | -1.37         | 0.00930 |
| STM1496         | STM1496 | putative dimethylsulfoxide reductase                  | -0.65         | 0.16295 | 0.16          | 0.64391 | -1.00         | 0.02990 |
| STM1497         | STM1497 | putative dimethyl sulphoxide reductase                | 1.61          | 0.10808 | 0.56          | 0.34094 | 0.45          | 0.42975 |
| STM1497         | STM1497 | putative dimethyl sulphoxide reductase                | 2.05          | 0.01067 | -0.34         | 0.58788 | 0.51          | 0.77850 |
| STM1498         | STM1498 | putative dimethyl sulphoxide reductase                | 0.68          | 0.12455 | -0.36         | 0.46396 | -0.40         | 0.49035 |
| STM1498         | STM1498 | putative dimethyl sulphoxide reductase                | 1.54          | 0.05178 | -0.64         | 0.12696 | 0.85          | 0.40178 |
| STM1499         | STM1499 | putative dimethyl sulphoxide reductase chain A1       | 4.09          | 0.00796 | 0.50          | 0.15826 | 1.45          | 0.05807 |
| STM1499         | STM1499 | putative dimethyl sulphoxide reductase chain A1       | 3.96          | 0.06602 | 0.07          | 0.93816 | 1.39          | 0.37065 |
| STM1500         | ynfD    | putative outer membrane protein                       | -0.48         | 0.52691 | 0.57          | 0.08393 | 0.82          | 0.05871 |
| STM1500         | ynfD    | putative outer membrane protein                       | 0.65          | 0.54784 | 0.26          | 0.55810 | 1.68          | 0.00453 |
| STM1501         | ynfC    | hypothetical protein STM1501                          | -0.39         | 0.35668 | -0.22         | 0.50703 | -0.55         | 0.13876 |
| STM1501         | ynfC    | hypothetical protein STM1501                          | -0.52         | 0.36796 | -0.46         | 0.15006 | -1.02         | 0.04461 |
| STM1502         | speG    | spermidine N1-acetyltransferase                       | -0.60         | 0.37359 | 0.25          | 0.49269 | -1.12         | 0.00925 |
| STM1502         | speG    | spermidine N1-acetyltransferase                       | -0.52         | 0.36902 | 0.19          | 0.60797 | -0.61         | 0.31551 |
| STM1503         | ynfB    | putative periplasmic protein                          | -0.75         | 0.30739 | -0.25         | 0.49971 | -2.32         | 0.00061 |
| STM1503         | ynfB    | putative periplasmic protein                          | -0.44         | 0.38764 | 0.28          | 0.43255 | -1.72         | 0.00344 |
| STM1504         | ynfA    | hypothetical protein STM1504                          | -0.31         | 0.48660 | -1.08         | 0.02060 | -1.00         | 0.08388 |
| STM1504         | ynfA    | hypothetical protein STM1504                          | 0.14          | 0.77240 | -1.19         | 0.01474 | -0.78         | 0.20117 |
| STM1505         | rspA    | putative dehydratase                                  | -0.45         | 0.40268 | 0.92          | 0.04869 | -1.41         | 0.01352 |
| STM1505         | rspA    | putative dehydratase                                  | 0.59          | 0.21555 | 1.28          | 0.02012 | 0.48          | 0.23360 |
| STM1506         | rspB    | putative dehydrogenase                                | -0.25         | 0.58469 | 2.15          | 0.00177 | 0.48          | 0.25584 |
| STM1506         | rspB    | putative dehydrogenase                                | 2.17          | 0.08918 | 2.19          | 0.00020 | -0.09         | 0.88212 |
| STM1508         | ydfI    | putative mannitol dehydrogenase                       | 1.10          | 0.05175 | -0.31         | 0.36782 | -0.56         | 0.51636 |
| STM1508         | ydfI    | putative mannitol dehydrogenase                       | 1.81          | 0.01730 | -0.50         | 0.13258 | 1.07          | 0.06285 |
| STM1510         | ydfH    | putative regulatory protein                           | 3.10          | 0.04151 | -0.43         | 0.40078 | 2.46          | 0.00068 |
| STM1510         | ydfH    | putative regulatory protein                           | 2.37          | 0.03083 | -0.05         | 0.95763 | 2.42          | 0.00122 |
| STM1511         | ydfG    | putative oxidoreductase                               | -1.24         | 0.07186 | 0.23          | 0.44814 | -0.48         | 0.26579 |
| STM1511         | ydfG    | putative oxidoreductase                               | -0.42         | 0.68440 | 0.48          | 0.14488 | 0.08          | 0.85420 |
| STM1512         | dcp     | dipeptidyl carboxypeptidase II                        | 0.17          | 0.73728 | 0.86          | 0.01835 | 1.36          | 0.00410 |
| STM1512         | dcp     | dipeptidyl carboxypeptidase II                        | 0.28          | 0.50901 | 0.74          | 0.05427 | 1.35          | 0.00554 |
| STM1514         | ydeJ    | competence damage-inducible protein A                 | 1.97          | 0.01145 | 0.73          | 0.09009 | 3.87          | 0.00007 |
| STM1514         | ydeJ    | competence damage-inducible protein A                 | 1.28          | 0.35494 | 0.84          | 0.04008 | 4.79          | 0.00002 |
| STM1515         | ydeI    | putative periplasmic protein                          | 1.33          | 0.11448 | 2.92          | 0.00007 | 3.83          | 0.00011 |
| STM1515         | ydeI    | putative periplasmic protein                          | 2.73          | 0.00796 | 3.17          | 0.00046 | 5.20          | 0.00002 |
| STM1516         | ydeE    | putative transport protein                            | 0.36          | 0.46980 | 0.34          | 0.27712 | 1.80          | 0.03979 |
| STM1516         | ydeE    | putative transport protein                            | 1.11          | 0.08383 | 0.52          | 0.17260 | 1.15          | 0.02046 |
| STM1517         | ydeD    | putative permease                                     | -0.83         | 0.13620 | 0.87          | 0.05888 | -0.14         | 0.80148 |
| STM1517         | ydeD    | putative permease                                     | -0.14         | 0.72927 | 0.26          | 0.51103 | -0.03         | 0.94846 |
| STM1518         | marB    | multiple antibiotic resistance protein                | -0.39         | 0.52984 | 0.80          | 0.01917 | -0.51         | 0.48750 |
| STM1518         | marB    | multiple antibiotic resistance protein                | 0.63          | 0.21170 | 1.17          | 0.01959 | -0.12         | 0.86380 |
| STM1519,S       | marA    | transcriptional activator                             | -0.26         | 0.69072 | 0.32          | 0.28007 | -1.30         | 0.06115 |
| STM1519,S       | marA    | transcriptional activator                             | 0.85          | 0.09815 | 0.47          | 0.22949 | -0.22         | 0.61613 |
| STM1520         | marR    | marRAB operon repressor                               | -0.43         | 0.34012 | 0.13          | 0.68202 | -0.21         | 0.73624 |
| STM1520         | marR    | marRAB operon repressor                               | 1.26          | 0.03408 | 0.71          | 0.03479 | 1.00          | 0.02426 |

**Table S2.** Genome-wide expression of *Salmonella enterica* serovar Typhimurium inside fibroblasts

|                 |            |                                                        | Intracellular WT<br>24 h p.i.                                                      |         | Intracellular <i>phoP</i><br>24 h p.i.                                              |         | Extracellular WT<br>stationary phase                                                |         |
|-----------------|------------|--------------------------------------------------------|------------------------------------------------------------------------------------|---------|-------------------------------------------------------------------------------------|---------|-------------------------------------------------------------------------------------|---------|
|                 |            |                                                        | Relative to WT<br>exponential LB                                                   |         | Relative to <i>phoP</i><br>exponential LB                                           |         | Relative to WT<br>exponential LB                                                    |         |
|                 |            |                                                        |  |         |  |         |  |         |
| Systematic name | Gene       | Product                                                | log2Ratio (M)                                                                      | p value | log2Ratio (M)                                                                       | p value | log2Ratio (M)                                                                       | p value |
| STM1521         | marC       | multiple antibiotic resistance transporter             | 0.07                                                                               | 0.87379 | 1.16                                                                                | 0.02072 | 0.63                                                                                | 0.11114 |
| STM1521         | marC       | multiple antibiotic resistance transporter             | 1.43                                                                               | 0.09269 | 0.91                                                                                | 0.01662 | 1.07                                                                                | 0.02941 |
| STM1522         | ydeA       | sugar efflux transporter                               | -0.03                                                                              | 0.96762 | 0.32                                                                                | 0.40803 | -0.35                                                                               | 0.57801 |
| STM1522         | ydeA       | sugar efflux transporter                               | 0.77                                                                               | 0.16474 | -0.01                                                                               | 0.99011 | 0.24                                                                                | 0.71298 |
| STM1523         | yneJ       | putative transcriptional regulator                     | 0.05                                                                               | 0.92833 | -0.02                                                                               | 0.96296 | -0.83                                                                               | 0.07077 |
| STM1523         | yneJ       | putative transcriptional regulator                     | 1.01                                                                               | 0.10160 | -0.57                                                                               | 0.26118 | 1.11                                                                                | 0.06321 |
| STM1524         | yneI       | putative succinate-semialdehyde dehydrogenase          | -1.13                                                                              | 0.05366 | -0.52                                                                               | 0.41852 | -1.41                                                                               | 0.03229 |
| STM1524         | yneI       | putative succinate-semialdehyde dehydrogenase          | -0.46                                                                              | 0.27870 | -0.89                                                                               | 0.02179 | -1.13                                                                               | 0.01696 |
| STM1525         | yneH       | glutaminase                                            | -0.68                                                                              | 0.14494 | -1.40                                                                               | 0.00786 | -1.65                                                                               | 0.00337 |
| STM1525         | yneH       | glutaminase                                            | 1.56                                                                               | 0.09446 | -0.86                                                                               | 0.06664 | 0.41                                                                                | 0.40580 |
| STM1526         | yneG       | putative cytoplasmic protein                           | -0.02                                                                              | 0.96762 | -0.08                                                                               | 0.85492 | 0.13                                                                                | 0.81045 |
| STM1526         | yneG       | putative cytoplasmic protein                           | 2.72                                                                               | 0.00686 | 0.30                                                                                | 0.50717 | 0.77                                                                                | 0.15744 |
| STM1527         | STM1527    | putative inner membrane protein                        | -1.90                                                                              | 0.00961 | -0.49                                                                               | 0.26547 | -1.64                                                                               | 0.03707 |
| STM1527         | STM1527    | putative inner membrane protein                        | -0.83                                                                              | 0.11638 | -0.87                                                                               | 0.01877 | -1.16                                                                               | 0.03204 |
| STM1528         | STM1528    | putative outer membrane protein                        | -0.41                                                                              | 0.32925 | -1.06                                                                               | 0.01612 | -2.41                                                                               | 0.00033 |
| STM1528         | STM1528    | putative outer membrane protein                        | 0.08                                                                               | 0.91982 | -0.96                                                                               | 0.01415 | -1.60                                                                               | 0.03041 |
| STM1530         | STM1530    | putative outer membrane protein                        | -0.19                                                                              | 0.65199 | -0.88                                                                               | 0.03355 | -0.72                                                                               | 0.15472 |
| STM1530         | STM1530    | putative outer membrane protein                        | 0.71                                                                               | 0.15868 | -1.36                                                                               | 0.00193 | 0.43                                                                                | 0.42756 |
| STM1531         | STM1531    | putative hydrogenase                                   | -0.64                                                                              | 0.28619 | 0.29                                                                                | 0.52916 | -0.78                                                                               | 0.08463 |
| STM1531         | STM1531    | putative hydrogenase                                   | 0.67                                                                               | 0.18831 | -0.85                                                                               | 0.04936 | 0.62                                                                                | 0.20246 |
| STM1532         | STM1532    | putative dehydrogenase protein                         | -1.17                                                                              | 0.07385 | 0.18                                                                                | 0.56467 | -0.16                                                                               | 0.77687 |
| STM1532         | STM1532    | putative dehydrogenase protein                         | 0.19                                                                               | 0.70717 | 0.90                                                                                | 0.02145 | 0.72                                                                                | 0.28099 |
| STM1533         | STM1533    | putative hydrogenase                                   | 0.02                                                                               | 0.97024 | 0.91                                                                                | 0.02185 | 1.12                                                                                | 0.02808 |
| STM1533         | STM1533    | putative hydrogenase                                   | -0.42                                                                              | 0.37718 | -0.03                                                                               | 0.94244 | 0.44                                                                                | 0.32549 |
| STM1534         | STM1534    | putative hydrogenase                                   | -0.59                                                                              | 0.18763 | 0.58                                                                                | 0.15199 | 0.38                                                                                | 0.35900 |
| STM1534         | STM1534    | putative hydrogenase                                   | 4.23                                                                               | 0.04782 | -0.52                                                                               | 0.31195 | 1.05                                                                                | 0.32969 |
| STM1535         | STM1535    | putative hydrogenase protein                           | 2.86                                                                               | 0.01386 | 3.53                                                                                | 0.00019 | 4.01                                                                                | 0.00416 |
| STM1535         | STM1535    | putative hydrogenase protein                           | 3.96                                                                               | 0.01363 | 3.62                                                                                | 0.00061 | 5.18                                                                                | 0.00018 |
| STM1536         | STM1536    | putative hydrogenase maturation protease               | -0.59                                                                              | 0.22882 | 0.06                                                                                | 0.87241 | -1.13                                                                               | 0.01240 |
| STM1536         | STM1536    | putative hydrogenase maturation protease               | -0.42                                                                              | 0.53066 | 0.42                                                                                | 0.17344 | 0.03                                                                                | 0.94628 |
| STM1537         | STM1537    | putative Ni/Fe hydrogenase 1 b-type cytochrome subunit | 0.07                                                                               | 0.91111 | 0.88                                                                                | 0.02192 | 1.38                                                                                | 0.29775 |
| STM1537         | STM1537    | putative Ni/Fe hydrogenase 1 b-type cytochrome subunit | 0.70                                                                               | 0.28909 | 0.71                                                                                | 0.25332 | 2.03                                                                                | 0.00056 |
| STM1538         | STM1538    | putative hydrogenase-1 large subunit                   | -0.45                                                                              | 0.45200 | -1.96                                                                               | 0.00043 | -1.07                                                                               | 0.23861 |
| STM1538         | STM1538    | putative hydrogenase-1 large subunit                   | 0.34                                                                               | 0.64515 | -1.34                                                                               | 0.00421 | -0.10                                                                               | 0.89368 |
| STM1539         | STM1539    | putative hydrogenase-1 small subunit                   | 1.61                                                                               | 0.03167 | 0.56                                                                                | 0.16970 | 2.76                                                                                | 0.00070 |
| STM1539         | STM1539    | putative hydrogenase-1 small subunit                   | 2.50                                                                               | 0.01199 | 0.45                                                                                | 0.27223 | 4.14                                                                                | 0.00011 |
| STM1540         | STM1540    | putative hydrolase                                     | 0.14                                                                               | 0.75644 | 1.18                                                                                | 0.00572 | 0.03                                                                                | 0.96501 |
| STM1540         | STM1540    | putative hydrolase                                     | 0.54                                                                               | 0.23498 | 0.40                                                                                | 0.22094 | 0.55                                                                                | 0.71621 |
| STM1541         | STM1541    | putative regulatory protein                            | -0.44                                                                              | 0.43816 | -0.14                                                                               | 0.70071 | -1.15                                                                               | 0.16921 |
| STM1541         | STM1541    | putative regulatory protein                            | 1.13                                                                               | 0.07255 | 0.37                                                                                | 0.43514 | -0.63                                                                               | 0.15775 |
| STM1542         | STM1542    | putative zinc-binding dehydrogenase                    | -0.63                                                                              | 0.17126 | 0.22                                                                                | 0.52399 | -0.04                                                                               | 0.96274 |
| STM1542         | STM1542    | putative zinc-binding dehydrogenase                    | -0.21                                                                              | 0.74980 | -0.25                                                                               | 0.41398 | -0.02                                                                               | 0.98515 |
| STM1543         | STM1543    | putative transport protein                             | -0.54                                                                              | 0.45690 | -0.56                                                                               | 0.06749 | -0.66                                                                               | 0.26963 |
| STM1543         | STM1543    | putative transport protein                             | 0.26                                                                               | 0.61303 | -0.97                                                                               | 0.06141 | -0.33                                                                               | 0.54909 |
| STM1544         | pqaA       | PhoPQ-regulated protein                                | 1.49                                                                               | 0.36075 | -0.53                                                                               | 0.38661 | 4.46                                                                                | 0.00007 |
| STM1544         | pqaA       | PhoPQ-regulated protein                                | 2.10                                                                               | 0.01423 | 0.28                                                                                | 0.39541 | 1.68                                                                                | 0.01131 |
| STM1545         | STM1545    | putative multidrug efflux protein                      | -1.16                                                                              | 0.05515 | 0.06                                                                                | 0.95580 | -0.15                                                                               | 0.82386 |
| STM1545         | STM1545    | putative multidrug efflux protein                      | -0.05                                                                              | 0.94323 | -0.83                                                                               | 0.05633 | -0.26                                                                               | 0.68954 |
| STM1546         | STM1546    | hypothetical protein STM1546                           | 0.16                                                                               | 0.87984 | 0.73                                                                                | 0.17278 | 2.34                                                                                | 0.00033 |
| STM1546         | STM1546    | hypothetical protein STM1546                           | -0.04                                                                              | 0.97145 | 1.28                                                                                | 0.00379 | 2.10                                                                                | 0.00086 |
| STM1547         | STM1547    | putative transcriptional regulator                     | -0.68                                                                              | 0.53089 | 0.44                                                                                | 0.24065 | -0.65                                                                               | 0.18212 |
| STM1547         | STM1547    | putative transcriptional regulator                     | -0.06                                                                              | 0.90171 | 0.45                                                                                | 0.61067 | -0.36                                                                               | 0.42907 |
| STM1548,s       | STM1548,s  | putative S-adenosylmethionine/tRNA-ribosyltransferase- | -0.14                                                                              | 0.76703 | 1.12                                                                                | 0.03228 | -0.12                                                                               | 0.76580 |
| STM1548,s       | STM1548,s  | putative S-adenosylmethionine/tRNA-ribosyltransferase- | 1.05                                                                               | 0.07165 | 0.69                                                                                | 0.03687 | 0.09                                                                                | 0.86189 |
| STM1549         | STM1549    | putative translation initiation inhibitor              | -0.83                                                                              | 0.13871 | 0.30                                                                                | 0.39659 | -0.73                                                                               | 0.08768 |
| STM1549         | STM1549    | putative translation initiation inhibitor              | 0.91                                                                               | 0.09777 | 0.03                                                                                | 0.94227 | -2.28                                                                               | 0.04355 |
| STM1551         | STM1551    | putative cytoplasmic protein                           | -0.20                                                                              | 0.71423 | 1.73                                                                                | 0.00151 | -0.29                                                                               | 0.45946 |
| STM1551         | STM1551    | putative cytoplasmic protein                           | 0.71                                                                               | 0.17877 | 1.43                                                                                | 0.00162 | 0.37                                                                                | 0.40482 |
| STM1551,1n      | STM1551,1n | hypothetical protein STM1551,1n                        | -0.89                                                                              | 0.29994 | 0.05                                                                                | 0.95900 | -0.87                                                                               | 0.11740 |
| STM1551,1n      | STM1551,1n | hypothetical protein STM1551,1n                        | 0.45                                                                               | 0.54889 | -0.73                                                                               | 0.16386 | -1.64                                                                               | 0.02940 |
| STM1552         | STM1552    | putative cytoplasmic protein                           | -0.78                                                                              | 0.22942 | -0.63                                                                               | 0.10115 | -0.17                                                                               | 0.71053 |
| STM1552         | STM1552    | putative cytoplasmic protein                           | -0.77                                                                              | 0.17565 | -0.99                                                                               | 0.03131 | -0.03                                                                               | 0.97028 |
| STM1554         | STM1554    | putative coiled-coil protein                           | -0.55                                                                              | 0.30875 | -0.01                                                                               | 0.98161 | -1.95                                                                               | 0.03837 |
| STM1554         | STM1554    | putative coiled-coil protein                           | 0.34                                                                               | 0.42046 | -0.03                                                                               | 0.93418 | 0.51                                                                                | 0.15860 |
| STM1555         | STM1555    | putative transcriptional regulator                     | -0.70                                                                              | 0.24394 | 0.11                                                                                | 0.76943 | -0.97                                                                               | 0.21310 |
| STM1555         | STM1555    | putative transcriptional regulator                     | 0.12                                                                               | 0.88688 | -0.99                                                                               | 0.14756 | -0.49                                                                               | 0.38106 |
| STM1556         | STM1556    | putative Na <sup>+</sup> /H <sup>+</sup> antiporter    | -0.52                                                                              | 0.41231 | 0.60                                                                                | 0.09379 | 0.09                                                                                | 0.91116 |
| STM1556         | STM1556    | putative Na <sup>+</sup> /H <sup>+</sup> antiporter    | 0.77                                                                               | 0.22411 | 1.10                                                                                | 0.05093 | 0.76                                                                                | 0.30573 |
| STM1557         | STM1557    | putative aminotransferase                              | 0.77                                                                               | 0.18990 | 0.55                                                                                | 0.08841 | 1.37                                                                                | 0.01833 |
| STM1557         | STM1557    | putative aminotransferase                              | 2.20                                                                               | 0.01549 | 0.71                                                                                | 0.19622 | 3.06                                                                                | 0.00045 |



**Table S2.** Genome-wide expression of *Salmonella enterica* serovar Typhimurium inside fibroblasts

Intracellular WT 24 h p.i.      Intracellular *phoP* 24 h p.i.      Extracellular WT stationary phase

Relative to WT exponential LB      Relative to *phoP* exponential LB      Relative to WT exponential LB



| Systematic name | Gene    | Product                                                            | log2Ratio (M) | p value | log2Ratio (M) | p value | log2Ratio (M) | p value |
|-----------------|---------|--------------------------------------------------------------------|---------------|---------|---------------|---------|---------------|---------|
| STM1593         | srfA    | putative virulence protein                                         | -1.12         | 0.16928 | -2.16         | 0.00064 | -2.17         | 0.00122 |
| STM1593         | srfA    | putative virulence protein                                         | -0.96         | 0.05659 | -2.57         | 0.00036 | -1.63         | 0.00651 |
| STM1594         | srfB    | putative virulence protein                                         | -1.42         | 0.02181 | -2.23         | 0.00071 | -1.76         | 0.00355 |
| STM1594         | srfB    | putative virulence protein                                         | -1.16         | 0.04220 | -2.50         | 0.00043 | -0.81         | 0.11111 |
| STM1595         | srfC    | putative virulence protein                                         | -1.08         | 0.11005 | -0.59         | 0.16356 | -1.32         | 0.01135 |
| STM1595         | srfC    | putative virulence protein                                         | -0.21         | 0.65193 | -0.67         | 0.08004 | -0.99         | 0.02349 |
| STM1596         | ycdX    | putative inner membrane protein                                    | -1.40         | 0.08966 | -1.26         | 0.00303 | -1.27         | 0.01398 |
| STM1596         | ycdX    | putative inner membrane protein                                    | -0.90         | 0.12247 | -1.16         | 0.00589 | -0.86         | 0.16637 |
| STM1597         | ycdW    | putative aldehyde dehydrogenase                                    | 0.03          | 0.97285 | 1.26          | 0.01590 | 1.95          | 0.00098 |
| STM1597         | ycdW    | putative aldehyde dehydrogenase                                    | 1.42          | 0.17631 | 0.70          | 0.04587 | 2.99          | 0.00058 |
| STM1598         | ycdR    | putative regulatory protein                                        | -0.62         | 0.18603 | 0.22          | 0.63032 | -0.10         | 0.80954 |
| STM1598         | ycdR    | putative regulatory protein                                        | 0.58          | 0.25068 | 0.35          | 0.32539 | 1.29          | 0.00926 |
| STM1599         | pdgL    | periplasmic dipeptidase precursor                                  | -0.12         | 0.81589 | 0.20          | 0.66854 | -0.89         | 0.05874 |
| STM1599         | pdgL    | periplasmic dipeptidase precursor                                  | 0.98          | 0.08238 | -0.49         | 0.28230 | 0.55          | 0.25187 |
| STM1601         | ugtL    | hypothetical protein STM1601                                       | 0.16          | 0.75196 | 0.94          | 0.01841 | -0.23         | 0.65290 |
| STM1601         | ugtL    | hypothetical protein STM1601                                       | 1.79          | 0.04722 | 1.32          | 0.01230 | 1.37          | 0.05310 |
| STM1602         | sifB    | secreted effector protein                                          | 0.59          | 0.35920 | 4.90          | 0.00001 | 0.72          | 0.19653 |
| STM1602         | sifB    | secreted effector protein                                          | 1.66          | 0.03871 | 4.58          | 0.00004 | 1.26          | 0.02343 |
| STM1603         | yncJ    | putative periplasmic protein                                       | 0.99          | 0.07851 | 3.37          | 0.00002 | 0.64          | 0.22912 |
| STM1603         | yncJ    | putative periplasmic protein                                       | 1.16          | 0.02992 | 3.75          | 0.00001 | 1.50          | 0.00722 |
| STM1604         | ycdP    | putative collagenase                                               | 0.05          | 0.94155 | -0.23         | 0.42735 | -1.25         | 0.01313 |
| STM1604         | ycdP    | putative collagenase                                               | -0.50         | 0.40544 | 0.32          | 0.37708 | -1.17         | 0.06733 |
| STM1605         | ycdN    | putative repressor                                                 | -0.17         | 0.70215 | 0.11          | 0.71105 | -0.43         | 0.44697 |
| STM1605         | ycdN    | putative repressor                                                 | 0.80          | 0.11459 | 0.03          | 0.93074 | 0.18          | 0.63574 |
| STM1606         | STM1606 | putative benzoate membrane transport protein                       | -0.32         | 0.45043 | 0.15          | 0.62769 | -0.95         | 0.02830 |
| STM1606         | STM1606 | putative benzoate membrane transport protein                       | 0.89          | 0.19780 | 0.85          | 0.01554 | 0.32          | 0.36938 |
| STM1607         | STM1607 | putative outer membrane lipoprotein                                | -0.67         | 0.26183 | 1.51          | 0.00215 | -0.07         | 0.91283 |
| STM1607         | STM1607 | putative outer membrane lipoprotein                                | 0.33          | 0.63233 | 1.24          | 0.00374 | 0.38          | 0.35900 |
| STM1608         | tehB    | putative methyltransferase                                         | -0.52         | 0.30295 | 1.10          | 0.00441 | -1.04         | 0.02039 |
| STM1608         | tehB    | putative methyltransferase                                         | 0.10          | 0.87990 | 1.09          | 0.01146 | -0.89         | 0.07640 |
| STM1609         | tehA    | K <sup>+</sup> -tellurite ethidium and proflavin transport protein | -0.39         | 0.53193 | 1.16          | 0.00999 | -1.88         | 0.01007 |
| STM1609         | tehA    | K <sup>+</sup> -tellurite ethidium and proflavin transport protein | -1.28         | 0.17542 | 1.33          | 0.01368 | -0.62         | 0.11432 |
| STM1610         | ycdK    | putative nucleoside-diphosphate-sugar pyrophosphorylase            | -0.38         | 0.67039 | 1.00          | 0.01348 | -0.51         | 0.33330 |
| STM1610         | ycdK    | putative nucleoside-diphosphate-sugar pyrophosphorylase            | 1.55          | 0.02623 | 0.63          | 0.21179 | 0.83          | 0.06915 |
| STM1611         | rimL    | acetyl transferase                                                 | 0.33          | 0.43816 | 1.33          | 0.00419 | 0.60          | 0.24877 |
| STM1611         | rimL    | acetyl transferase                                                 | 0.73          | 0.26129 | 1.50          | 0.00501 | 1.33          | 0.02837 |
| STM1612         | STM1612 | putative cellulase protein                                         | 0.20          | 0.80772 | 2.10          | 0.00103 | 1.93          | 0.03312 |
| STM1612         | STM1612 | putative cellulase protein                                         | 2.04          | 0.04353 | 3.05          | 0.00016 | 3.08          | 0.00181 |
| STM1613         | STM1613 | putative PTS system enzyme IIB component                           | -0.10         | 0.92542 | 2.09          | 0.00095 | 0.59          | 0.39706 |
| STM1613         | STM1613 | putative PTS system enzyme IIB component                           | 0.43          | 0.36007 | 2.64          | 0.00177 | 1.16          | 0.02969 |
| STM1614         | STM1614 | putative PTS system enzyme IIC component                           | 0.33          | 0.55671 | 1.33          | 0.01013 | -0.08         | 0.91117 |
| STM1614         | STM1614 | putative PTS system enzyme IIC component                           | -0.73         | 0.11697 | 0.42          | 0.21010 | -0.08         | 0.91587 |
| STM1615         | STM1615 | putative nucleoside triphosphatase                                 | -0.22         | 0.70958 | 0.27          | 0.71894 | 0.14          | 0.76913 |
| STM1615         | STM1615 | putative nucleoside triphosphatase                                 | -0.66         | 0.71609 | -0.89         | 0.03682 | -0.70         | 0.43761 |
| STM1616         | STM1616 | putative sugar-specific PTS enzyme II                              | -0.10         | 0.84287 | 0.68          | 0.05081 | 0.64          | 0.08973 |
| STM1616         | STM1616 | putative sugar-specific PTS enzyme II                              | 0.17          | 0.77290 | 0.42          | 0.28791 | 1.30          | 0.04449 |
| STM1617         | STM1617 | ribulose-phosphate 3-epimerase                                     | -0.36         | 0.81801 | -1.71         | 0.00395 | -0.05         | 0.96438 |
| STM1617         | STM1617 | ribulose-phosphate 3-epimerase                                     | 0.28          | 0.70640 | -1.54         | 0.00851 | -0.11         | 0.87470 |
| STM1618         | STM1618 | putative transcriptional repressor of sgc operon                   | 1.45          | 0.02104 | 1.06          | 0.04498 | 0.04          | 0.91658 |
| STM1618         | STM1618 | putative transcriptional repressor of sgc operon                   | 1.50          | 0.11284 | 1.60          | 0.00397 | 1.52          | 0.03378 |
| STM1619         | STM1619 | cryptic aminoglycoside resistance gene                             | 0.55          | 0.57930 | 0.13          | 0.84363 | 0.51          | 0.44761 |
| STM1619         | STM1619 | cryptic aminoglycoside resistance gene                             | 2.19          | 0.01041 | 0.14          | 0.69727 | 0.77          | 0.06414 |
| STM1620         | STM1620 | putative oxidase                                                   | 0.96          | 0.07169 | 0.82          | 0.11245 | 0.91          | 0.05629 |
| STM1620         | STM1620 | putative oxidase                                                   | 2.15          | 0.04747 | 0.19          | 0.65721 | 2.13          | 0.00431 |
| STM1621         | STM1621 | putative periplasmic protein                                       | 1.08          | 0.07541 | 0.96          | 0.07100 | 1.78          | 0.00267 |
| STM1621         | STM1621 | putative periplasmic protein                                       | 0.21          | 0.82543 | -0.44         | 0.42969 | 1.14          | 0.27220 |
| STM1622         | ycdG    | putative MDO biosynthetic protein                                  | -0.73         | 0.14680 | -0.12         | 0.76129 | -1.34         | 0.00827 |
| STM1622         | ycdG    | putative MDO biosynthetic protein                                  | 0.32          | 0.63876 | -0.92         | 0.02564 | -1.03         | 0.14813 |
| STM1623         | STM1623 | putative carboxylesterase                                          | -1.59         | 0.12536 | -1.22         | 0.00536 | -0.78         | 0.22159 |
| STM1623         | STM1623 | putative carboxylesterase                                          | -0.74         | 0.13497 | -0.98         | 0.02307 | -1.58         | 0.02766 |
| STM1624         | STM1624 | putative cytoplasmic protein                                       | -0.41         | 0.31997 | -0.26         | 0.53412 | 1.87          | 0.00108 |
| STM1624         | STM1624 | putative cytoplasmic protein                                       | 0.37          | 0.58858 | 0.49          | 0.18575 | 2.50          | 0.00062 |
| STM1625         | ydcl    | putative transcriptional regulator                                 | -1.30         | 0.03038 | 0.36          | 0.38197 | -1.68         | 0.01430 |
| STM1625         | ydcl    | putative transcriptional regulator                                 | 1.78          | 0.15252 | 0.38          | 0.22398 | 0.59          | 0.39650 |
| STM1626         | trg     | methyl-accepting chemotaxis protein III                            | -1.02         | 0.15994 | -0.18         | 0.53261 | 0.12          | 0.83871 |
| STM1626         | trg     | methyl-accepting chemotaxis protein III                            | -0.85         | 0.09981 | -0.59         | 0.06877 | -0.58         | 0.58409 |
| STM1627         | STM1627 | alcohol dehydrogenase class III                                    | -1.08         | 0.04331 | -0.69         | 0.13068 | -1.27         | 0.00954 |
| STM1627         | STM1627 | alcohol dehydrogenase class III                                    | 0.04          | 0.96627 | -0.04         | 0.91235 | -0.39         | 0.41520 |
| STM1628         | STM1628 | putative cytoplasmic protein                                       | -1.85         | 0.07172 | -0.18         | 0.64133 | -1.74         | 0.00425 |
| STM1628         | STM1628 | putative cytoplasmic protein                                       | -0.68         | 0.20611 | 0.09          | 0.79292 | -2.70         | 0.00952 |

**Table S2.** Genome-wide expression of *Salmonella enterica* serovar Typhimurium inside fibroblasts

|                 |         |                                                         | Intracellular WT<br>24 h p.i.                                                      |         | Intracellular <i>phoP</i><br>24 h p.i.                                              |         | Extracellular WT<br>stationary phase                                                |         |
|-----------------|---------|---------------------------------------------------------|------------------------------------------------------------------------------------|---------|-------------------------------------------------------------------------------------|---------|-------------------------------------------------------------------------------------|---------|
|                 |         |                                                         | Relative to WT<br>exponential LB                                                   |         | Relative to <i>phoP</i><br>exponential LB                                           |         | Relative to WT<br>exponential LB                                                    |         |
|                 |         |                                                         |  |         |  |         |  |         |
| Systematic name | Gene    | Product                                                 | log2Ratio (M)                                                                      | p value | log2Ratio (M)                                                                       | p value | log2Ratio (M)                                                                       | p value |
| STM1630         | STM1630 | putative inner membrane protein                         | -0.92                                                                              | 0.27928 | -0.07                                                                               | 0.87343 | 0.11                                                                                | 0.89732 |
| STM1630         | STM1630 | putative inner membrane protein                         | -1.52                                                                              | 0.05747 | -0.42                                                                               | 0.50120 | 0.39                                                                                | 0.44819 |
| STM1631         | sseJ    | secreted effector protein                               | 0.48                                                                               | 0.54187 | 6.60                                                                                | 0.00000 | 0.64                                                                                | 0.27668 |
| STM1631         | sseJ    | secreted effector protein                               | 2.31                                                                               | 0.01196 | 6.36                                                                                | 0.00017 | 1.91                                                                                | 0.00403 |
| STM1632         | STM1632 | putative inner membrane protein                         | -0.16                                                                              | 0.72483 | 4.05                                                                                | 0.00035 | 0.22                                                                                | 0.67215 |
| STM1632         | STM1632 | putative inner membrane protein                         | 1.41                                                                               | 0.02948 | 4.27                                                                                | 0.00001 | 0.99                                                                                | 0.03547 |
| STM1633         | STM1633 | putative periplasmic binding protein                    | -0.30                                                                              | 0.53819 | 1.08                                                                                | 0.00550 | 0.29                                                                                | 0.61305 |
| STM1633         | STM1633 | putative periplasmic binding protein                    | 1.97                                                                               | 0.04122 | 1.97                                                                                | 0.00146 | 1.12                                                                                | 0.06253 |
| STM1634         | STM1634 | putative ABC transporter permease component             | -0.30                                                                              | 0.61184 | 0.23                                                                                | 0.70904 | -0.64                                                                               | 0.45142 |
| STM1634         | STM1634 | putative ABC transporter permease component             | -0.40                                                                              | 0.71442 | 0.80                                                                                | 0.04068 | 1.30                                                                                | 0.13646 |
| STM1635         | STM1635 | putative ABC-type polar amino acid transport system     | -1.16                                                                              | 0.28978 | -0.98                                                                               | 0.02865 | -0.65                                                                               | 0.10112 |
| STM1635         | STM1635 | putative ABC-type polar amino acid transport system     | 0.06                                                                               | 0.90746 | 0.08                                                                                | 0.88540 | 0.48                                                                                | 0.62129 |
| STM1636         | STM1636 | putative ABC-type transport system membrane component   | -0.14                                                                              | 0.76098 | -0.68                                                                               | 0.12306 | -1.07                                                                               | 0.02386 |
| STM1636         | STM1636 | putative ABC-type transport system membrane component   | 0.62                                                                               | 0.40841 | -0.99                                                                               | 0.12618 | 0.01                                                                                | 0.98561 |
| STM1637         | STM1637 | putative inner membrane protein                         | 0.06                                                                               | 0.89675 | 1.50                                                                                | 0.01338 | 0.08                                                                                | 0.90484 |
| STM1637         | STM1637 | putative inner membrane protein                         | 1.13                                                                               | 0.21880 | 1.27                                                                                | 0.00762 | 0.76                                                                                | 0.30835 |
| STM1638         | STM1638 | putative SAM-dependent methyltransferase                | 0.38                                                                               | 0.74464 | 0.44                                                                                | 0.24308 | -1.44                                                                               | 0.00743 |
| STM1638         | STM1638 | putative SAM-dependent methyltransferase                | -0.81                                                                              | 0.37351 | 1.19                                                                                | 0.00404 | 0.09                                                                                | 0.94483 |
| STM1639         | cybB    | cytochrome b561                                         | -1.25                                                                              | 0.02560 | 0.21                                                                                | 0.43528 | -0.76                                                                               | 0.04316 |
| STM1639         | cybB    | cytochrome b561                                         | -1.33                                                                              | 0.07413 | 0.10                                                                                | 0.87638 | -0.58                                                                               | 0.38739 |
| STM1640         | ydcF    | putative inner membrane protein                         | -0.93                                                                              | 0.22845 | -0.30                                                                               | 0.30992 | -1.14                                                                               | 0.08329 |
| STM1640         | ydcF    | putative inner membrane protein                         | -0.48                                                                              | 0.42965 | -0.34                                                                               | 0.28136 | -0.81                                                                               | 0.10652 |
| STM1641         | hrpA    | ATP-dependent helicase                                  | -1.35                                                                              | 0.02829 | -0.28                                                                               | 0.32126 | -0.68                                                                               | 0.11285 |
| STM1641         | hrpA    | ATP-dependent helicase                                  | -0.09                                                                              | 0.85794 | -0.15                                                                               | 0.67904 | 0.28                                                                                | 0.60951 |
| STM1642         | acpD    | acyl carrier protein phosphodiesterase                  | -1.22                                                                              | 0.07777 | 0.29                                                                                | 0.45624 | -0.26                                                                               | 0.64639 |
| STM1642         | acpD    | acyl carrier protein phosphodiesterase                  | 0.20                                                                               | 0.66546 | 0.70                                                                                | 0.06652 | -0.21                                                                               | 0.59561 |
| STM1643         | STM1643 | putative inner membrane protein                         | -0.70                                                                              | 0.13555 | 0.92                                                                                | 0.03865 | -0.03                                                                               | 0.94245 |
| STM1643         | STM1643 | putative inner membrane protein                         | 0.48                                                                               | 0.44306 | 0.83                                                                                | 0.04427 | 1.24                                                                                | 0.01526 |
| STM1644         | ydbL    | putative periplasmic protein                            | -0.06                                                                              | 0.90441 | -0.10                                                                               | 0.74266 | -0.21                                                                               | 0.62851 |
| STM1644         | ydbL    | putative periplasmic protein                            | 0.94                                                                               | 0.05468 | -0.53                                                                               | 0.24274 | 1.27                                                                                | 0.01142 |
| STM1645         | ynbE    | putative outer membrane lipoprotein                     | 0.72                                                                               | 0.13497 | 0.42                                                                                | 0.19802 | 0.83                                                                                | 0.05748 |
| STM1645         | ynbE    | putative outer membrane lipoprotein                     | 0.52                                                                               | 0.37752 | -0.08                                                                               | 0.80911 | 1.25                                                                                | 0.02617 |
| STM1646         | ydbH    | putative periplasmic protein                            | -0.91                                                                              | 0.12530 | -0.98                                                                               | 0.01195 | -0.30                                                                               | 0.55730 |
| STM1646         | ydbH    | putative periplasmic protein                            | -0.72                                                                              | 0.18585 | -0.35                                                                               | 0.27937 | -0.67                                                                               | 0.14240 |
| STM1647         | ldhA    | D-lactate dehydrogenase                                 | -0.18                                                                              | 0.68590 | -0.34                                                                               | 0.29079 | 0.14                                                                                | 0.74145 |
| STM1647         | ldhA    | D-lactate dehydrogenase                                 | 0.14                                                                               | 0.78563 | -0.18                                                                               | 0.59190 | 1.13                                                                                | 0.00918 |
| STM1648         | hslJ    | heat shock protein hslJ                                 | -0.87                                                                              | 0.15610 | 0.01                                                                                | 0.97623 | -0.34                                                                               | 0.59003 |
| STM1648         | hslJ    | heat shock protein hslJ                                 | 0.68                                                                               | 0.24718 | 0.13                                                                                | 0.78896 | 0.39                                                                                | 0.60389 |
| STM1649         | STM1649 | putative cytoplasmic protein                            | -0.40                                                                              | 0.75996 | 0.10                                                                                | 0.73720 | -1.75                                                                               | 0.05880 |
| STM1649         | STM1649 | putative cytoplasmic protein                            | -1.62                                                                              | 0.01924 | 0.10                                                                                | 0.72529 | -1.73                                                                               | 0.02341 |
| STM1651         | nifJ    | putative pyruvate-flavodoxin oxidoreductase             | -1.11                                                                              | 0.04676 | -0.31                                                                               | 0.34347 | -0.74                                                                               | 0.05241 |
| STM1651         | nifJ    | putative pyruvate-flavodoxin oxidoreductase             | 1.06                                                                               | 0.06656 | -0.86                                                                               | 0.01433 | 0.24                                                                                | 0.64119 |
| STM1652         | ynaF    | putative universal stress protein                       | -0.75                                                                              | 0.13364 | 0.43                                                                                | 0.30810 | -0.26                                                                               | 0.53950 |
| STM1652         | ynaF    | putative universal stress protein                       | -0.34                                                                              | 0.50056 | 0.73                                                                                | 0.09388 | -1.62                                                                               | 0.37041 |
| STM1654         | ydaO    | putative ATPase                                         | -2.17                                                                              | 0.01630 | -1.19                                                                               | 0.00677 | -1.78                                                                               | 0.02482 |
| STM1654         | ydaO    | putative ATPase                                         | -0.49                                                                              | 0.52932 | -0.84                                                                               | 0.04416 | -2.04                                                                               | 0.03389 |
| STM1655         | dbpA    | ATP-dependent RNA helicase                              | 1.41                                                                               | 0.01858 | 0.83                                                                                | 0.02153 | 3.02                                                                                | 0.00010 |
| STM1655         | dbpA    | ATP-dependent RNA helicase                              | 2.19                                                                               | 0.00756 | 0.03                                                                                | 0.95135 | 2.97                                                                                | 0.00079 |
| STM1656         | STM1656 | putative Zn transport protein                           | -0.36                                                                              | 0.46998 | -0.52                                                                               | 0.23971 | 0.24                                                                                | 0.55262 |
| STM1656         | STM1656 | putative Zn transport protein                           | -0.24                                                                              | 0.72641 | -1.10                                                                               | 0.01806 | 0.98                                                                                | 0.05059 |
| STM1657         | STM1657 | putative methyl-accepting chemotaxis protein            | 0.07                                                                               | 0.88446 | -0.45                                                                               | 0.23257 | -0.69                                                                               | 0.25304 |
| STM1657         | STM1657 | putative methyl-accepting chemotaxis protein            | -0.65                                                                              | 0.17495 | -0.65                                                                               | 0.06122 | -0.80                                                                               | 0.13876 |
| STM1658         | ydaL    | hypothetical protein STM1658                            | 0.22                                                                               | 0.64103 | 1.77                                                                                | 0.00169 | 0.45                                                                                | 0.25829 |
| STM1658         | ydaL    | hypothetical protein STM1658                            | 1.01                                                                               | 0.05991 | 1.52                                                                                | 0.00188 | 1.50                                                                                | 0.00504 |
| STM1659         | ogt     | O-6-alkylguanine-DNA/cysteine-protein methyltransferase | -0.36                                                                              | 0.41841 | 0.40                                                                                | 0.27824 | -0.46                                                                               | 0.41434 |
| STM1659         | ogt     | O-6-alkylguanine-DNA/cysteine-protein methyltransferase | 0.32                                                                               | 0.53602 | 0.83                                                                                | 0.04666 | 0.64                                                                                | 0.11222 |
| STM1660,S       | fmr     | transcriptional regulator                               | -0.41                                                                              | 0.40854 | 0.14                                                                                | 0.66794 | -0.29                                                                               | 0.41531 |
| STM1660,S       | fmr     | transcriptional regulator                               | -0.40                                                                              | 0.33144 | 0.25                                                                                | 0.47554 | 0.30                                                                                | 0.40067 |
| STM1661         | ydaA    | putative universal stress protein                       | -0.04                                                                              | 0.92334 | 0.68                                                                                | 0.03027 | 1.05                                                                                | 0.02280 |
| STM1661         | ydaA    | putative universal stress protein                       | -1.95                                                                              | 0.19270 | 1.13                                                                                | 0.02253 | 1.16                                                                                | 0.03823 |
| STM1662         | ynaJ    | putative inner membrane protein                         | -0.73                                                                              | 0.43818 | 1.07                                                                                | 0.01332 | 1.15                                                                                | 0.01240 |
| STM1662         | ynaJ    | putative inner membrane protein                         | -0.59                                                                              | 0.55612 | 1.02                                                                                | 0.01389 | 0.76                                                                                | 0.06475 |
| STM1663         | ynal    | putative integral membrane protein                      | -1.47                                                                              | 0.02479 | 0.40                                                                                | 0.43886 | -0.83                                                                               | 0.12587 |
| STM1663         | ynal    | putative integral membrane protein                      | 0.15                                                                               | 0.89449 | -0.33                                                                               | 0.45749 | 0.05                                                                                | 0.91884 |
| STM1664         | STM1664 | putative transcriptional regulator                      | -0.96                                                                              | 0.19533 | 0.40                                                                                | 0.39143 | -1.48                                                                               | 0.02468 |
| STM1664         | STM1664 | putative transcriptional regulator                      | 0.01                                                                               | 0.98812 | -0.16                                                                               | 0.73016 | -0.62                                                                               | 0.27844 |
| STM1665         | STM1665 | putative cytoplasmic protein                            | 2.07                                                                               | 0.10533 | 0.68                                                                                | 0.09770 | 0.96                                                                                | 0.14822 |
| STM1665         | STM1665 | putative cytoplasmic protein                            | -0.19                                                                              | 0.66786 | 0.36                                                                                | 0.42512 | 0.79                                                                                | 0.07519 |
| STM1667         | STM1667 | putative thiol peroxidase                               | -0.51                                                                              | 0.37772 | -0.18                                                                               | 0.65492 | -0.41                                                                               | 0.46262 |
| STM1667         | STM1667 | putative thiol peroxidase                               | -0.18                                                                              | 0.74592 | 0.44                                                                                | 0.27151 | 0.52                                                                                | 0.35137 |

**Table S2.** Genome-wide expression of *Salmonella enterica* serovar Typhimurium inside fibroblasts

Intracellular WT 24 h p.i.      Intracellular *phoP* 24 h p.i.      Extracellular WT stationary phase

Relative to WT exponential LB      Relative to *phoP* exponential LB      Relative to WT exponential LB



| Systematic name | Gene    | Product                                         | log2Ratio (M) | p value | log2Ratio (M) | p value | log2Ratio (M) | p value |
|-----------------|---------|-------------------------------------------------|---------------|---------|---------------|---------|---------------|---------|
| STM1668         | STM1668 | hypothetical protein STM1668                    | 0.37          | 0.49079 | 0.69          | 0.09337 | 0.95          | 0.09747 |
| STM1668         | STM1668 | hypothetical protein STM1668                    | 1.62          | 0.13871 | 0.02          | 0.96036 | 1.64          | 0.00522 |
| STM1669         | STM1669 | invasin-like protein                            | 1.09          | 0.04560 | 0.44          | 0.23307 | 1.11          | 0.01468 |
| STM1669         | STM1669 | invasin-like protein                            | 2.30          | 0.00789 | 0.14          | 0.86101 | 2.18          | 0.00613 |
| STM1670         | STM1670 | putative lipoprotein                            | 0.10          | 0.89045 | -0.09         | 0.87873 | -0.72         | 0.23424 |
| STM1670         | STM1670 | putative lipoprotein                            | 0.99          | 0.06395 | -0.79         | 0.08825 | 0.50          | 0.33333 |
| STM1671         | STM1671 | putative regulatory protein                     | -0.18         | 0.72462 | -1.29         | 0.16667 | 0.00          | 0.99551 |
| STM1671         | STM1671 | putative regulatory protein                     | -1.14         | 0.14696 | 0.91          | 0.13041 | -0.12         | 0.81076 |
| STM1673         | STM1673 | putative outer membrane lipoprotein             | -0.20         | 0.74341 | 0.06          | 0.84575 | -0.55         | 0.23076 |
| STM1673         | STM1673 | putative outer membrane lipoprotein             | 0.60          | 0.28785 | 0.82          | 0.01673 | 0.96          | 0.06130 |
| STM1674         | STM1674 | putative regulatory protein                     | 0.52          | 0.56134 | -0.11         | 0.73971 | 0.08          | 0.84201 |
| STM1674         | STM1674 | putative regulatory protein                     | 1.52          | 0.04427 | 0.00          | 0.99752 | 1.93          | 0.02164 |
| STM1675         | STM1675 | oxidoreductase                                  | -0.42         | 0.42614 | -0.71         | 0.05331 | -1.07         | 0.01218 |
| STM1675         | STM1675 | oxidoreductase                                  | 0.35          | 0.49783 | -0.99         | 0.05817 | -0.79         | 0.32923 |
| STM1676         | STM1676 | putative aldo/keto reductase                    | -0.36         | 0.43816 | -0.52         | 0.19673 | -0.86         | 0.05789 |
| STM1676         | STM1676 | putative aldo/keto reductase                    | 0.27          | 0.62210 | -0.50         | 0.24218 | 0.26          | 0.52778 |
| STM1677         | STM1677 | putative transcriptional regulator              | 0.37          | 0.58374 | -0.18         | 0.69795 | 0.44          | 0.24665 |
| STM1677         | STM1677 | putative transcriptional regulator              | 0.93          | 0.08254 | -0.08         | 0.84905 | 1.35          | 0.00723 |
| STM1678         | STM1678 | putative 2'-hydroxyisoflavone reductase         | 0.15          | 0.85165 | 1.26          | 0.00544 | -0.35         | 0.68811 |
| STM1678         | STM1678 | putative 2'-hydroxyisoflavone reductase         | 0.37          | 0.48816 | 1.15          | 0.00817 | 0.02          | 0.96960 |
| STM1679         | mppA    | periplasmic murein tripeptide transport protein | -1.04         | 0.05440 | 0.58          | 0.07695 | -0.73         | 0.05531 |
| STM1679         | mppA    | periplasmic murein tripeptide transport protein | -0.12         | 0.83998 | 0.97          | 0.00804 | -0.18         | 0.70609 |
| STM1680         | ycjI    | putative carboxypeptidase                       | -0.55         | 0.29898 | 1.09          | 0.00550 | 0.37          | 0.31313 |
| STM1680         | ycjI    | putative carboxypeptidase                       | 0.68          | 0.20801 | 0.55          | 0.10346 | -0.42         | 0.41515 |
| STM1681         | ycjG    | putative chloromuconate cycloisomerase          | -0.33         | 0.56308 | 0.59          | 0.12594 | -0.21         | 0.74239 |
| STM1681         | ycjG    | putative chloromuconate cycloisomerase          | 1.63          | 0.07790 | 0.51          | 0.11648 | -0.71         | 0.11225 |
| STM1682         | tpx     | thiol peroxidase                                | -1.88         | 0.01079 | 0.53          | 0.15289 | -2.49         | 0.00093 |
| STM1682         | tpx     | thiol peroxidase                                | -1.31         | 0.06226 | 0.88          | 0.01457 | -2.75         | 0.00032 |
| STM1683         | tyrR    | transcriptional regulator                       | -1.41         | 0.06501 | 0.40          | 0.25556 | -1.42         | 0.00983 |
| STM1683         | tyrR    | transcriptional regulator                       | -1.46         | 0.02259 | 0.62          | 0.08758 | -1.81         | 0.00084 |
| STM1684         | ycjF    | hypothetical protein STM1684                    | -0.09         | 0.83532 | 1.10          | 0.00516 | 0.85          | 0.09187 |
| STM1684         | ycjF    | hypothetical protein STM1684                    | -0.45         | 0.51104 | 0.66          | 0.12039 | 1.47          | 0.27653 |
| STM1685         | ycjX    | putative ATPase                                 | -0.67         | 0.28111 | 2.13          | 0.00113 | -0.56         | 0.31674 |
| STM1685         | ycjX    | putative ATPase                                 | 0.35          | 0.48090 | 2.20          | 0.00129 | -1.21         | 0.01733 |
| STM1686         | pspE    | phage shock protein                             | 2.04          | 0.01951 | 3.99          | 0.00007 | 0.17          | 0.67325 |
| STM1686         | pspE    | phage shock protein                             | 3.12          | 0.00582 | 4.10          | 0.00002 | 0.31          | 0.47971 |
| STM1687         | pspD    | phage shock protein                             | 1.85          | 0.01067 | 4.22          | 0.00005 | -0.44         | 0.36487 |
| STM1687         | pspD    | phage shock protein                             | 3.12          | 0.00541 | 4.59          | 0.00001 | -0.21         | 0.62362 |
| STM1688         | pspC    | phage shock protein                             | 3.22          | 0.04188 | 4.65          | 0.00002 | 0.60          | 0.13302 |
| STM1688         | pspC    | phage shock protein                             | 3.83          | 0.00537 | 4.84          | 0.00001 | 0.26          | 0.50165 |
| STM1689         | pspB    | phage shock protein B                           | 4.46          | 0.00567 | 5.84          | 0.00000 | 0.71          | 0.06451 |
| STM1689         | pspB    | phage shock protein B                           | 5.81          | 0.00308 | 5.39          | 0.00001 | 1.66          | 0.00354 |
| STM1690         | pspA    | phage shock protein                             | 4.41          | 0.00581 | 5.70          | 0.00000 | 2.30          | 0.00081 |
| STM1690         | pspA    | phage shock protein                             | 5.27          | 0.00512 | 5.54          | 0.00000 | 2.85          | 0.00028 |
| STM1691         | pspF    | transcription activator                         | 1.69          | 0.22926 | 0.35          | 0.41085 | 0.54          | 0.53652 |
| STM1691         | pspF    | transcription activator                         | 1.26          | 0.06541 | 0.29          | 0.38885 | 0.20          | 0.70819 |
| STM1692         | sapA    | peptide transport protein                       | -1.55         | 0.06900 | -0.30         | 0.67697 | -0.69         | 0.11488 |
| STM1692         | sapA    | peptide transport protein                       | 0.07          | 0.90537 | -1.49         | 0.00120 | -0.84         | 0.22880 |
| STM1693         | sapB    | peptide transport protein                       | -2.15         | 0.01601 | -1.42         | 0.00319 | -1.55         | 0.01817 |
| STM1693         | sapB    | peptide transport protein                       | -0.82         | 0.37797 | -1.16         | 0.02688 | -0.75         | 0.05163 |
| STM1694         | sapC    | peptide transport protein                       | -1.77         | 0.05032 | -1.31         | 0.00200 | -1.44         | 0.02066 |
| STM1694         | sapC    | peptide transport protein                       | -1.25         | 0.10628 | -2.04         | 0.00074 | -1.91         | 0.01187 |
| STM1695         | sapD    | peptide transport protein                       | -0.99         | 0.17383 | -0.70         | 0.06219 | -1.56         | 0.00289 |
| STM1695         | sapD    | peptide transport protein                       | -0.87         | 0.30631 | -0.54         | 0.22603 | -1.45         | 0.02231 |
| STM1696         | sapF    | peptide transport protein                       | -0.33         | 0.44726 | 0.97          | 0.02519 | -1.16         | 0.01504 |
| STM1696         | sapF    | peptide transport protein                       | 0.33          | 0.54425 | 1.43          | 0.00380 | 0.10          | 0.86723 |
| STM1697         | STM1697 | hypothetical protein STM1697                    | 0.44          | 0.32307 | 1.53          | 0.00129 | -0.36         | 0.52398 |
| STM1697         | STM1697 | hypothetical protein STM1697                    | 0.75          | 0.14119 | 2.07          | 0.00019 | -0.09         | 0.87295 |
| STM1698         | STM1698 | putative inner membrane protein                 | -0.50         | 0.28856 | 5.77          | 0.00000 | -1.55         | 0.01035 |
| STM1698         | STM1698 | putative inner membrane protein                 | 1.01          | 0.06323 | 6.34          | 0.00001 | -0.15         | 0.71969 |
| STM1700         | fabI    | enoyl-(acyl carrier protein) reductase          | -2.06         | 0.00922 | -0.02         | 0.96753 | -1.66         | 0.00204 |
| STM1700         | fabI    | enoyl-(acyl carrier protein) reductase          | -0.99         | 0.09502 | 0.57          | 0.06750 | -1.58         | 0.04737 |
| STM1701         | yciW    | putative cytoplasmic protein                    | -1.34         | 0.06399 | -0.79         | 0.02039 | -1.53         | 0.02715 |
| STM1701         | yciW    | putative cytoplasmic protein                    | -0.93         | 0.06238 | -0.24         | 0.44860 | -1.24         | 0.01017 |
| STM1702         | rnb     | exoribonuclease II                              | -1.27         | 0.04582 | -0.70         | 0.02865 | -1.55         | 0.01145 |
| STM1702         | rnb     | exoribonuclease II                              | -0.80         | 0.10733 | -1.11         | 0.00438 | -0.60         | 0.11910 |
| STM1703         | yciR    | putative diguanylate cyclase/phosphodiesterase  | -0.12         | 0.90732 | 0.80          | 0.02281 | 0.96          | 0.35445 |
| STM1703         | yciR    | putative diguanylate cyclase/phosphodiesterase  | 1.70          | 0.02137 | 0.79          | 0.02667 | 0.32          | 0.49412 |
| STM1704         | yciT    | putative regulatory protein                     | -1.33         | 0.02655 | -0.08         | 0.82407 | -0.37         | 0.34719 |
| STM1704         | yciT    | putative regulatory protein                     | 0.16          | 0.85117 | -0.86         | 0.02816 | 0.00          | 0.99213 |

**Table S2.** Genome-wide expression of *Salmonella enterica* serovar Typhimurium inside fibroblasts

Intracellular WT 24 h p.i.      Intracellular *phoP* 24 h p.i.      Extracellular WT stationary phase

Relative to WT exponential LB      Relative to *phoP* exponential LB      Relative to WT exponential LB



| Systematic name | Gene    | Product                                                 | log2Ratio (M) | p value | log2Ratio (M) | p value | log2Ratio (M) | p value |
|-----------------|---------|---------------------------------------------------------|---------------|---------|---------------|---------|---------------|---------|
| STM1705         | osmB    | lipoprotein B                                           | 1.93          | 0.02064 | 2.20          | 0.00035 | 4.40          | 0.00014 |
| STM1705         | osmB    | lipoprotein B                                           | 1.18          | 0.03236 | 1.90          | 0.00099 | 4.74          | 0.00002 |
| STM1706         | yciH    | hypothetical protein STM1706                            | 1.17          | 0.11648 | 0.24          | 0.43113 | 0.33          | 0.39346 |
| STM1706         | yciH    | hypothetical protein STM1706                            | 1.44          | 0.01740 | -0.15         | 0.72294 | 1.48          | 0.00349 |
| STM1707         | pyrF    | orotidine 5'-phosphate decarboxylase                    | -2.35         | 0.01566 | -1.17         | 0.00474 | -0.60         | 0.17104 |
| STM1707         | pyrF    | orotidine 5'-phosphate decarboxylase                    | -0.43         | 0.43189 | -1.14         | 0.01053 | -0.52         | 0.22146 |
| STM1708         | yciM    | putative N-acetylglucosaminyl transferase               | -0.73         | 0.39846 | 0.08          | 0.86854 | -0.12         | 0.85406 |
| STM1708         | yciM    | putative N-acetylglucosaminyl transferase               | -1.34         | 0.03037 | 0.05          | 0.86597 | -1.21         | 0.01534 |
| STM1709         | yciS    | putative inner membrane protein                         | -1.94         | 0.01101 | -0.29         | 0.39221 | -1.88         | 0.00142 |
| STM1709         | yciS    | putative inner membrane protein                         | -1.03         | 0.05800 | 0.32          | 0.28549 | -2.06         | 0.00052 |
| STM1710         | pgpB    | phosphatidylglycerophosphate phosphatase B              | -0.74         | 0.12384 | 1.20          | 0.01783 | 0.04          | 0.92925 |
| STM1710         | pgpB    | phosphatidylglycerophosphate phosphatase B              | -0.40         | 0.35034 | 0.99          | 0.01295 | 1.11          | 0.02434 |
| STM1711         | ribA    | GTP cyclohydrolase II protein                           | 0.06          | 0.95465 | -0.39         | 0.24800 | 0.49          | 0.43554 |
| STM1711         | ribA    | GTP cyclohydrolase II protein                           | 0.25          | 0.87141 | 0.26          | 0.40432 | 0.95          | 0.16683 |
| STM1712         | acnA    | aconitate hydratase                                     | -0.16         | 0.69471 | 0.18          | 0.64442 | 0.44          | 0.20630 |
| STM1712         | acnA    | aconitate hydratase                                     | 0.41          | 0.32552 | -0.07         | 0.83266 | 1.25          | 0.01767 |
| STM1713         | cysB    | transcriptional regulator for cysteine regulon          | 1.93          | 0.26717 | -0.11         | 0.77260 | -0.76         | 0.28800 |
| STM1713         | cysB    | transcriptional regulator for cysteine regulon          | 1.03          | 0.05056 | 0.43          | 0.15936 | 0.54          | 0.17064 |
| STM1714         | topA    | DNA topoisomerase I                                     | 0.52          | 0.44116 | 0.08          | 0.81422 | 0.13          | 0.85441 |
| STM1714         | topA    | DNA topoisomerase I                                     | 2.15          | 0.03517 | 0.12          | 0.73817 | 0.87          | 0.05322 |
| STM1715         | yciN    | putative cytoplasmic protein                            | -0.85         | 0.27646 | -1.31         | 0.00269 | -0.46         | 0.37033 |
| STM1715         | yciN    | putative cytoplasmic protein                            | -0.03         | 0.95489 | -1.22         | 0.00331 | -0.84         | 0.03691 |
| STM1716         | sohB    | putative peptidase                                      | 0.50          | 0.60914 | -0.24         | 0.46854 | -1.52         | 0.00398 |
| STM1716         | sohB    | putative peptidase                                      | 0.84          | 0.24166 | 0.01          | 0.96715 | -1.31         | 0.01609 |
| STM1717         | yciK    | short chain dehydrogenase                               | -1.81         | 0.01032 | 0.55          | 0.23828 | -1.16         | 0.01435 |
| STM1717         | yciK    | short chain dehydrogenase                               | -0.42         | 0.36133 | 0.83          | 0.02504 | 0.45          | 0.23874 |
| STM1718         | btuR    | cob(II)yrinic acid a,c-diamide adenosyltransferase      | -1.88         | 0.02908 | -0.44         | 0.12628 | -1.70         | 0.00839 |
| STM1718         | btuR    | cob(II)yrinic acid a,c-diamide adenosyltransferase      | -1.64         | 0.04326 | -0.48         | 0.10115 | -2.10         | 0.05765 |
| STM1719         | yciL    | putative ribosomal large subunit pseudouridine synthase | -1.66         | 0.01391 | -0.79         | 0.04869 | -2.51         | 0.00032 |
| STM1719         | yciL    | putative ribosomal large subunit pseudouridine synthase | -1.52         | 0.01753 | -0.90         | 0.04537 | -1.80         | 0.00276 |
| STM1720         | yciO    | putative dsRNA-binding protein                          | -0.13         | 0.83105 | -0.13         | 0.72481 | -1.41         | 0.00481 |
| STM1720         | yciO    | putative dsRNA-binding protein                          | 0.75          | 0.18460 | 0.32          | 0.37035 | -1.08         | 0.07843 |
| STM1721         | trpH    | hypothetical protein STM1721                            | -1.68         | 0.01741 | 0.51          | 0.14837 | -1.09         | 0.01731 |
| STM1721         | trpH    | hypothetical protein STM1721                            | -1.07         | 0.09108 | 0.79          | 0.03202 | -0.36         | 0.47944 |
| STM1723         | trpE    | anthranilate synthase component I                       | -0.50         | 0.29099 | 1.27          | 0.01393 | 0.24          | 0.54835 |
| STM1723         | trpE    | anthranilate synthase component I                       | -0.50         | 0.69462 | 1.28          | 0.00760 | 0.40          | 0.31776 |
| STM1724         | trpD    | anthranilate phosphoribosyltransferase                  | -1.03         | 0.13709 | 1.25          | 0.03782 | -1.08         | 0.01220 |
| STM1724         | trpD    | anthranilate phosphoribosyltransferase                  | 0.24          | 0.76454 | 1.59          | 0.00387 | 0.30          | 0.45535 |
| STM1725         | trpC    | bifunctional indole-3-glycerol phosphate                | -0.86         | 0.10403 | 1.61          | 0.00243 | 0.15          | 0.72044 |
| STM1725         | trpC    | bifunctional indole-3-glycerol phosphate                | -0.22         | 0.88887 | 1.57          | 0.00075 | -0.76         | 0.12196 |
| STM1726         | trpB    | tryptophan synthase subunit beta                        | 0.49          | 0.54784 | 2.12          | 0.00055 | 0.77          | 0.14447 |
| STM1726         | trpB    | tryptophan synthase subunit beta                        | -1.83         | 0.06773 | 2.26          | 0.00022 | 0.19          | 0.67664 |
| STM1727         | trpA    | tryptophan synthase subunit alpha                       | -0.33         | 0.59371 | 0.39          | 0.48880 | 0.49          | 0.37174 |
| STM1727         | trpA    | tryptophan synthase subunit alpha                       | 0.35          | 0.38726 | -0.14         | 0.73291 | 1.37          | 0.00810 |
| STM1728         | yciG    | putative cytoplasmic protein                            | 0.57          | 0.34131 | 2.73          | 0.00016 | 9.56          | 0.00001 |
| STM1728         | yciG    | putative cytoplasmic protein                            | 1.22          | 0.04764 | 2.92          | 0.00033 | 9.94          | 0.00001 |
| STM1729         | yciF    | putative cytoplasmic protein                            | 1.98          | 0.01722 | -0.58         | 0.18907 | 4.65          | 0.00006 |
| STM1729         | yciF    | putative cytoplasmic protein                            | 2.54          | 0.01257 | -0.79         | 0.10049 | 5.82          | 0.00006 |
| STM1730         | yciE    | putative cytoplasmic protein                            | 0.09          | 0.87489 | 1.05          | 0.03714 | 4.92          | 0.00008 |
| STM1730         | yciE    | putative cytoplasmic protein                            | 1.21          | 0.13003 | 0.76          | 0.10295 | 5.32          | 0.00009 |
| STM1731         | STM1731 | putative catalase                                       | 2.73          | 0.00627 | 1.09          | 0.32533 | 3.42          | 0.00160 |
| STM1731         | STM1731 | putative catalase                                       | 3.07          | 0.00541 | -0.08         | 0.88876 | 3.70          | 0.00015 |
| STM1732         | ompW    | outer membrane protein W precursor                      | 1.12          | 0.14828 | 0.37          | 0.36876 | 0.88          | 0.08351 |
| STM1732         | ompW    | outer membrane protein W precursor                      | 2.84          | 0.07400 | 0.15          | 0.72730 | 1.86          | 0.00482 |
| STM1733         | STM1733 | putative ferredoxin                                     | -0.48         | 0.26894 | 0.92          | 0.01800 | -0.52         | 0.15550 |
| STM1733         | STM1733 | putative ferredoxin                                     | 0.38          | 0.47513 | 1.44          | 0.00152 | 0.54          | 0.28659 |
| STM1734         | yciC    | hypothetical protein STM1734                            | -1.16         | 0.12984 | -0.19         | 0.57388 | -1.17         | 0.01815 |
| STM1734         | yciC    | hypothetical protein STM1734                            | -0.44         | 0.30885 | -0.19         | 0.51869 | -0.95         | 0.23475 |
| STM1735         | yciB    | putative intracellular septation protein                | -0.05         | 0.96137 | -0.29         | 0.33283 | -0.45         | 0.44697 |
| STM1735         | yciB    | putative intracellular septation protein                | -0.13         | 0.86652 | 0.09          | 0.84064 | -1.49         | 0.20119 |
| STM1736         | yciA    | putative Acyl-CoA hydrolase                             | -0.27         | 0.65402 | -0.02         | 0.96348 | -1.24         | 0.02160 |
| STM1736         | yciA    | putative Acyl-CoA hydrolase                             | -0.49         | 0.36774 | 0.48          | 0.11014 | -1.12         | 0.05123 |
| STM1737         | tonB    | periplasmic protein                                     | 0.16          | 0.80250 | 0.77          | 0.02678 | -0.88         | 0.15765 |
| STM1737         | tonB    | periplasmic protein                                     | 0.11          | 0.79059 | 0.76          | 0.04650 | -0.41         | 0.32946 |
| STM1738         | yciI    | putative cytoplasmic protein                            | -0.44         | 0.36401 | 0.46          | 0.16730 | -1.05         | 0.02255 |
| STM1738         | yciI    | putative cytoplasmic protein                            | -0.47         | 0.28742 | 0.61          | 0.06548 | -0.54         | 0.23646 |
| STM1739         | cls     | cardiolipin synthetase                                  | -0.68         | 0.11908 | -0.11         | 0.76820 | -0.55         | 0.17285 |
| STM1739         | cls     | cardiolipin synthetase                                  | 0.66          | 0.15487 | 0.24          | 0.48035 | 0.04          | 0.95099 |
| STM1741         | STM1741 | putative voltage-gated potassium channel                | -0.20         | 0.68092 | 0.10          | 0.78745 | -0.08         | 0.88181 |
| STM1741         | STM1741 | putative voltage-gated potassium channel                | 0.85          | 0.59115 | -0.80         | 0.02257 | 0.27          | 0.54480 |

**Table S2.** Genome-wide expression of *Salmonella enterica* serovar Typhimurium inside fibroblasts

Intracellular WT 24 h p.i.      Intracellular *phoP* 24 h p.i.      Extracellular WT stationary phase

Relative to WT exponential LB      Relative to *phoP* exponential LB      Relative to WT exponential LB

| Systematic name | Gene    | Product                                        | log2Ratio (M) | p value | log2Ratio (M) | p value | log2Ratio (M) | p value |
|-----------------|---------|------------------------------------------------|---------------|---------|---------------|---------|---------------|---------|
| STM1742         | oppF    | oligopeptide transport protein                 | -1.17         | 0.09992 | 0.62          | 0.06337 | 0.69          | 0.08426 |
| STM1742         | oppF    | oligopeptide transport protein                 | -0.16         | 0.75688 | 0.32          | 0.34189 | -0.15         | 0.76744 |
| STM1743         | oppD    | oligopeptide transporter ATP-binding component | 0.23          | 0.81712 | 0.50          | 0.11869 | -0.29         | 0.74442 |
| STM1743         | oppD    | oligopeptide transporter ATP-binding component | 2.51          | 0.00747 | 0.69          | 0.04822 | -0.18         | 0.81252 |
| STM1744         | oppC    | oligopeptide transport protein                 | -0.78         | 0.18217 | 0.39          | 0.30700 | 0.03          | 0.95920 |
| STM1744         | oppC    | oligopeptide transport protein                 | 0.28          | 0.68556 | 0.61          | 0.07138 | -0.17         | 0.73163 |
| STM1745         | oppB    | oligopeptide permease ABC transporter membrane | -1.54         | 0.03905 | 0.43          | 0.58382 | -1.47         | 0.01667 |
| STM1745         | oppB    | oligopeptide permease ABC transporter membrane | -0.30         | 0.61000 | -0.31         | 0.41915 | -0.17         | 0.84393 |
| STM1746,S       | oppA    | oligopeptide transport protein                 | -0.09         | 0.92192 | 2.34          | 0.00023 | -0.15         | 0.74177 |
| STM1746,S       | oppA    | oligopeptide transport protein                 | 0.22          | 0.78556 | 2.82          | 0.00009 | -0.53         | 0.17375 |
| STM1748         | ychE    | putative integral membrane protein             | 1.41          | 0.04933 | -0.24         | 0.55886 | 1.60          | 0.06407 |
| STM1748         | ychE    | putative integral membrane protein             | 1.37          | 0.02845 | -0.58         | 0.14276 | -0.61         | 0.23261 |
| STM1749         | adhE    | iron-dependent alcohol dehydrogenase           | 0.78          | 0.11427 | 0.78          | 0.03074 | 1.77          | 0.00129 |
| STM1749         | adhE    | iron-dependent alcohol dehydrogenase           | 1.28          | 0.02838 | 1.15          | 0.00530 | 2.33          | 0.00110 |
| STM1750         | tdk     | thymidine kinase                               | 0.07          | 0.89997 | -0.51         | 0.11302 | -0.74         | 0.05032 |
| STM1750         | tdk     | thymidine kinase                               | 1.58          | 0.03552 | 0.05          | 0.89029 | 0.16          | 0.79147 |
| STM1751         | hns     | DNA-binding protein HLP-II                     | -0.46         | 0.54118 | 0.70          | 0.04936 | -0.02         | 0.95416 |
| STM1751         | hns     | DNA-binding protein HLP-II                     | 0.31          | 0.57278 | 0.77          | 0.03407 | -0.03         | 0.95904 |
| STM1752         | galU    | glucose-1-phosphate uridylyltransferase        | -1.19         | 0.03293 | 1.05          | 0.00653 | -0.79         | 0.11420 |
| STM1752         | galU    | glucose-1-phosphate uridylyltransferase        | -0.21         | 0.71082 | 0.71          | 0.03824 | -0.56         | 0.16215 |
| STM1753         | hnr     | response regulator                             | -0.12         | 0.89255 | -0.46         | 0.20794 | -0.41         | 0.41451 |
| STM1753         | hnr     | response regulator                             | -0.03         | 0.97323 | -0.89         | 0.14427 | 1.13          | 0.03238 |
| STM1754         | ychK    | putative phosphoesterase                       | -1.24         | 0.04313 | -0.74         | 0.05451 | -0.95         | 0.10252 |
| STM1754         | ychK    | putative phosphoesterase                       | -0.79         | 0.12276 | -0.68         | 0.03335 | 0.32          | 0.51476 |
| STM1755         | ychJ    | hypothetical protein STM1755                   | -1.84         | 0.01963 | -0.68         | 0.03694 | -1.26         | 0.10996 |
| STM1755         | ychJ    | hypothetical protein STM1755                   | -1.31         | 0.06828 | -0.73         | 0.02381 | -0.87         | 0.06998 |
| STM1756         | purU    | formyltetrahydrofolate deformylase             | -3.20         | 0.00541 | -1.06         | 0.01496 | -1.54         | 0.00309 |
| STM1756         | purU    | formyltetrahydrofolate deformylase             | -1.49         | 0.11036 | -1.21         | 0.00229 | -1.41         | 0.04852 |
| STM1757         | tyrT    | STM1757                                        | -0.50         | 0.60869 | -1.65         | 0.00173 | -0.69         | 0.16121 |
| STM1757         | tyrT    | STM1757                                        | 0.27          | 0.65110 | -1.01         | 0.00832 | -0.70         | 0.08626 |
| STM1758         | rtT     | STM1758                                        | -0.73         | 0.22585 | -1.83         | 0.00042 | -2.44         | 0.00028 |
| STM1758         | rtT     | STM1758                                        | -1.06         | 0.06025 | -1.17         | 0.00791 | -1.78         | 0.00296 |
| STM1759         | tyrV    | STM1759                                        | -0.49         | 0.50198 | -1.88         | 0.00109 | -0.10         | 0.84748 |
| STM1759         | tyrV    | STM1759                                        | -0.21         | 0.69393 | -1.62         | 0.00134 | -0.63         | 0.13548 |
| STM1760         | STM1760 | tetratricopeptide repeat protein               | 0.20          | 0.78328 | -0.73         | 0.03511 | 0.61          | 0.28682 |
| STM1760         | STM1760 | tetratricopeptide repeat protein               | 1.63          | 0.03715 | -0.22         | 0.43148 | 0.70          | 0.12451 |
| STM1761         | narI    | nitrate reductase 1 gamma subunit              | -0.15         | 0.70958 | -0.10         | 0.72195 | -0.65         | 0.09943 |
| STM1761         | narI    | nitrate reductase 1 gamma subunit              | 0.29          | 0.68360 | -0.42         | 0.14427 | -0.56         | 0.23680 |
| STM1762         | narJ    | nitrate reductase 1 delta subunit              | 0.84          | 0.31460 | -0.25         | 0.42695 | -0.75         | 0.08184 |
| STM1762         | narJ    | nitrate reductase 1 delta subunit              | 1.54          | 0.02588 | -0.75         | 0.02000 | -0.06         | 0.90592 |
| STM1763         | narH    | nitrate reductase 1 beta subunit               | -0.60         | 0.37870 | 0.22          | 0.51046 | -1.19         | 0.04827 |
| STM1763         | narH    | nitrate reductase 1 beta subunit               | 0.96          | 0.26990 | -0.47         | 0.15199 | 0.56          | 0.36023 |
| STM1764         | narG    | nitrate reductase 1 alpha subunit              | 0.32          | 0.60323 | -0.30         | 0.54197 | 0.56          | 0.34026 |
| STM1764         | narG    | nitrate reductase 1 alpha subunit              | 1.16          | 0.03756 | 0.03          | 0.94280 | 1.49          | 0.00486 |
| STM1765         | narK    | nitrite extrusion protein                      | -1.17         | 0.11156 | -0.06         | 0.92834 | -1.08         | 0.05136 |
| STM1765         | narK    | nitrite extrusion protein                      | 0.17          | 0.72937 | -0.33         | 0.50308 | 0.06          | 0.91035 |
| STM1766         | narX    | sensory histidine kinase                       | -0.67         | 0.35595 | 1.22          | 0.07274 | -0.71         | 0.27027 |
| STM1766         | narX    | sensory histidine kinase                       | 0.23          | 0.61190 | 1.02          | 0.01052 | -0.56         | 0.23529 |
| STM1767         | narL    | response regulator                             | 1.13          | 0.24890 | 1.53          | 0.03402 | 0.71          | 0.50372 |
| STM1767         | narL    | response regulator                             | 2.53          | 0.06690 | 3.16          | 0.00989 | 3.57          | 0.01880 |
| STM1768         | ychP    | putative invasin                               | -1.11         | 0.10387 | -0.43         | 0.62945 | 0.53          | 0.37940 |
| STM1768         | ychP    | putative invasin                               | -0.10         | 0.84920 | 0.75          | 0.03423 | -0.20         | 0.63608 |
| STM1769         | ychN    | putative sulfur reduction protein              | -0.76         | 0.13795 | 0.97          | 0.03683 | -0.07         | 0.88173 |
| STM1769         | ychN    | putative sulfur reduction protein              | 0.05          | 0.90987 | 0.72          | 0.03615 | 0.60          | 0.12086 |
| STM1770         | chaB    | cation transport regulator                     | -0.19         | 0.81928 | 1.84          | 0.00129 | 3.22          | 0.00011 |
| STM1770         | chaB    | cation transport regulator                     | 1.05          | 0.10071 | 1.40          | 0.00409 | 3.59          | 0.00014 |
| STM1771         | chaA    | sodium-calcium/proton antiporter               | -0.18         | 0.70066 | -0.10         | 0.78276 | -1.62         | 0.00722 |
| STM1771         | chaA    | sodium-calcium/proton antiporter               | -0.09         | 0.83664 | 0.08          | 0.82502 | -0.83         | 0.06413 |
| STM1772         | kdsA    | 2-dehydro-3-deoxyphosphooctonate aldolase      | -0.97         | 0.06005 | 0.02          | 0.96249 | -2.30         | 0.00315 |
| STM1772         | kdsA    | 2-dehydro-3-deoxyphosphooctonate aldolase      | -0.11         | 0.85232 | 0.15          | 0.63173 | -0.85         | 0.14915 |
| STM1773         | ychA    | putative transcriptional regulator             | -2.33         | 0.00660 | -1.31         | 0.00265 | -2.23         | 0.00274 |
| STM1773         | ychA    | putative transcriptional regulator             | -1.35         | 0.07992 | -1.00         | 0.01545 | -2.30         | 0.00030 |
| STM1774         | sirC    | transcriptional regulator                      | -2.26         | 0.00747 | -1.66         | 0.00075 | -2.78         | 0.00077 |
| STM1774         | sirC    | transcriptional regulator                      | -2.16         | 0.02605 | -0.93         | 0.00989 | -2.51         | 0.01183 |
| STM1775         | hemK    | N5-glutamine S-adenosyl-L-methionine-dependent | -1.74         | 0.01289 | -1.75         | 0.00069 | -1.77         | 0.00155 |
| STM1775         | hemK    | N5-glutamine S-adenosyl-L-methionine-dependent | -0.69         | 0.13620 | -1.73         | 0.00804 | -0.59         | 0.11017 |
| STM1776         | prfA    | peptide chain release factor 1                 | -0.79         | 0.11797 | -1.97         | 0.00035 | -2.45         | 0.00178 |
| STM1776         | prfA    | peptide chain release factor 1                 | 0.39          | 0.57568 | -1.47         | 0.00157 | -2.11         | 0.01443 |
| STM1777         | hemA    | glutamyl-tRNA reductase                        | -2.97         | 0.00957 | -2.22         | 0.00016 | -2.28         | 0.00053 |
| STM1777         | hemA    | glutamyl-tRNA reductase                        | -2.25         | 0.01041 | -1.85         | 0.00073 | -2.30         | 0.00143 |

**Table S2.** Genome-wide expression of *Salmonella enterica* serovar Typhimurium inside fibroblasts

Intracellular WT 24 h p.i.      Intracellular *phoP* 24 h p.i.      Extracellular WT stationary phase

Relative to WT exponential LB      Relative to *phoP* exponential LB      Relative to WT exponential LB



| Systematic name | Gene    | Product                                                | log2Ratio (M) | p value | log2Ratio (M) | p value | log2Ratio (M) | p value |
|-----------------|---------|--------------------------------------------------------|---------------|---------|---------------|---------|---------------|---------|
| STM1778         | lolB    | outer membrane lipoprotein LolB precursor              | -2.46         | 0.00645 | -0.40         | 0.24496 | -1.84         | 0.00403 |
| STM1778         | lolB    | outer membrane lipoprotein LolB precursor              | -1.10         | 0.06843 | -0.07         | 0.85187 | -0.97         | 0.02512 |
| STM1779         | ipk     | 4-diphosphocytidyl-2-C-methyl-D-erythritol kinase      | -3.30         | 0.01562 | -0.80         | 0.01544 | -4.11         | 0.00007 |
| STM1779         | ipk     | 4-diphosphocytidyl-2-C-methyl-D-erythritol kinase      | -2.98         | 0.02506 | -0.58         | 0.07712 | -3.43         | 0.00008 |
| STM1780         | prsA    | ribose-phosphate pyrophosphokinase                     | -1.14         | 0.06232 | 0.11          | 0.70659 | -1.96         | 0.00518 |
| STM1780         | prsA    | ribose-phosphate pyrophosphokinase                     | -0.22         | 0.71993 | 0.68          | 0.04325 | -1.12         | 0.13122 |
| STM1781         | ychM    | putative transport protein                             | -0.52         | 0.20702 | -0.24         | 0.59609 | -0.69         | 0.06285 |
| STM1781         | ychM    | putative transport protein                             | 0.25          | 0.60061 | -0.47         | 0.12426 | 0.55          | 0.31447 |
| STM1782         | ychH    | putative inner membrane protein                        | -0.16         | 0.71523 | 0.38          | 0.17560 | 0.16          | 0.70952 |
| STM1782         | ychH    | putative inner membrane protein                        | 0.07          | 0.94318 | 0.10          | 0.79449 | 1.20          | 0.01833 |
| STM1783,S       | pth     | peptidyl-tRNA hydrolase                                | -1.68         | 0.03082 | -0.47         | 0.22548 | -1.90         | 0.00068 |
| STM1783,S       | pth     | peptidyl-tRNA hydrolase                                | -0.93         | 0.06648 | -0.69         | 0.05422 | -0.98         | 0.01832 |
| STM1784         | ychF    | putative GTP-binding protein                           | 0.29          | 0.53344 | -0.36         | 0.28464 | 0.80          | 0.24472 |
| STM1784         | ychF    | putative GTP-binding protein                           | 1.41          | 0.01970 | -0.34         | 0.33869 | 2.35          | 0.00027 |
| STM1785         | STM1785 | putative cytoplasmic protein                           | -0.73         | 0.17732 | -0.44         | 0.16042 | -0.66         | 0.12110 |
| STM1785         | STM1785 | putative cytoplasmic protein                           | -0.23         | 0.69641 | -0.50         | 0.13595 | -0.10         | 0.81893 |
| STM1786         | STM1786 | hydrogenase-1 small subunit                            | 2.72          | 0.01063 | 0.99          | 0.05130 | 3.40          | 0.00643 |
| STM1786         | STM1786 | hydrogenase-1 small subunit                            | 4.66          | 0.00512 | 0.49          | 0.40512 | 4.27          | 0.00012 |
| STM1787         | STM1787 | hydrogenase-1 large subunit                            | 0.70          | 0.25720 | -2.83         | 0.00025 | -0.43         | 0.49349 |
| STM1787         | STM1787 | hydrogenase-1 large subunit                            | 0.93          | 0.25394 | -2.49         | 0.00201 | 1.14          | 0.02782 |
| STM1788         | STM1788 | putative Ni/Fe hydrogenase 1 b-type cytochrome subunit | -0.18         | 0.81579 | -0.93         | 0.10958 | -0.36         | 0.37158 |
| STM1788         | STM1788 | putative Ni/Fe hydrogenase 1 b-type cytochrome subunit | 0.78          | 0.12984 | -0.04         | 0.94701 | 0.56          | 0.19159 |
| STM1789         | STM1789 | putative hydrogenase maturation protease               | 1.56          | 0.04270 | 1.74          | 0.00160 | 2.45          | 0.00093 |
| STM1789         | STM1789 | putative hydrogenase maturation protease               | 1.72          | 0.02601 | 0.26          | 0.74343 | 2.36          | 0.00090 |
| STM1790         | STM1790 | putative chaperone                                     | -0.29         | 0.72124 | -1.65         | 0.02894 | -0.65         | 0.44194 |
| STM1790         | STM1790 | putative chaperone                                     | 1.87          | 0.04212 | -0.79         | 0.09950 | -1.43         | 0.01239 |
| STM1791         | STM1791 | putative hydrogenase-1 protein                         | 0.11          | 0.81981 | -1.00         | 0.01035 | -1.40         | 0.02488 |
| STM1791         | STM1791 | putative hydrogenase-1 protein                         | 0.59          | 0.22078 | -1.13         | 0.00602 | 0.09          | 0.87274 |
| STM1792         | STM1792 | putative cytochrome oxidase subunit I                  | -0.49         | 0.30493 | -2.56         | 0.00071 | -1.28         | 0.14497 |
| STM1792         | STM1792 | putative cytochrome oxidase subunit I                  | 0.54          | 0.21536 | -1.06         | 0.05380 | -0.22         | 0.64205 |
| STM1793         | STM1793 | putative cytochrome oxidase subunit II                 | 0.55          | 0.32854 | 0.07          | 0.91626 | 0.10          | 0.79361 |
| STM1793         | STM1793 | putative cytochrome oxidase subunit II                 | 5.37          | 0.02043 | 0.16          | 0.72937 | 2.62          | 0.02852 |
| STM1795         | STM1795 | putative glutamic dehydrogenase-like protein           | -0.19         | 0.82084 | 0.88          | 0.02982 | 0.39          | 0.29354 |
| STM1795         | STM1795 | putative glutamic dehydrogenase-like protein           | -0.29         | 0.71427 | 1.29          | 0.00667 | 1.40          | 0.00765 |
| STM1796         | treA    | trehalase                                              | -0.31         | 0.64480 | 1.44          | 0.00210 | 1.77          | 0.00602 |
| STM1796         | treA    | trehalase                                              | 0.97          | 0.14957 | 1.67          | 0.00055 | 2.95          | 0.00011 |
| STM1797         | ymgE    | putative transglycosylase-associated protein           | 0.19          | 0.66258 | 1.05          | 0.07722 | 2.27          | 0.00118 |
| STM1797         | ymgE    | putative transglycosylase-associated protein           | 0.61          | 0.23679 | 0.58          | 0.08296 | 2.11          | 0.00176 |
| STM1798         | ycgR    | putative inner membrane protein                        | -0.90         | 0.09175 | -0.62         | 0.07502 | -1.03         | 0.03239 |
| STM1798         | ycgR    | putative inner membrane protein                        | -0.52         | 0.40921 | -0.89         | 0.01630 | -0.74         | 0.11684 |
| STM1799         | emtA    | membrane-bound lytic murein transglycosylase E         | -0.94         | 0.06614 | -1.17         | 0.02011 | -0.52         | 0.15994 |
| STM1799         | emtA    | membrane-bound lytic murein transglycosylase E         | -0.61         | 0.19018 | -1.00         | 0.01030 | -1.18         | 0.01113 |
| STM1800         | ycgQ    | putative microcin C7 resistance protein                | -0.86         | 0.19542 | 0.30          | 0.45792 | -0.03         | 0.96386 |
| STM1800         | ycgQ    | putative microcin C7 resistance protein                | -1.21         | 0.19673 | -0.31         | 0.38885 | -0.77         | 0.06160 |
| STM1801         | ycgO    | cell volume regulation protein CvrA                    | 0.72          | 0.13459 | -0.03         | 0.93046 | 0.65          | 0.37379 |
| STM1801         | ycgO    | cell volume regulation protein CvrA                    | 1.80          | 0.01836 | -0.07         | 0.87209 | 2.23          | 0.00156 |
| STM1802         | alr     | alanine racemase                                       | -1.31         | 0.03064 | 0.04          | 0.90454 | -0.67         | 0.48750 |
| STM1802         | alr     | alanine racemase                                       | 0.83          | 0.59024 | -0.25         | 0.55009 | 0.70          | 0.24995 |
| STM1803         | dadA    | D-amino acid dehydrogenase small subunit               | -0.81         | 0.48179 | 1.27          | 0.00892 | 0.87          | 0.07753 |
| STM1803         | dadA    | D-amino acid dehydrogenase small subunit               | -0.62         | 0.58469 | 1.15          | 0.02172 | 0.66          | 0.25984 |
| STM1804,S       | ycgB    | putative cytoplasmic protein                           | 1.31          | 0.03224 | 2.10          | 0.00036 | 1.95          | 0.00140 |
| STM1804,S       | ycgB    | putative cytoplasmic protein                           | 1.73          | 0.01244 | 2.29          | 0.00063 | 2.73          | 0.00024 |
| STM1805         | fadR    | fatty acid metabolism regulator                        | -1.11         | 0.09684 | 1.29          | 0.00433 | -0.07         | 0.87046 |
| STM1805         | fadR    | fatty acid metabolism regulator                        | 1.41          | 0.23122 | 0.96          | 0.02151 | 0.73          | 0.06349 |
| STM1806         | nhaB    | Na <sup>+</sup> /H <sup>+</sup> antiporter             | -0.03         | 0.96020 | -0.10         | 0.81370 | -1.56         | 0.00471 |
| STM1806         | nhaB    | Na <sup>+</sup> /H <sup>+</sup> antiporter             | 0.07          | 0.88091 | -0.15         | 0.69958 | -0.33         | 0.39997 |
| STM1807         | dsbB    | disulfide bond formation protein B                     | -1.23         | 0.03425 | 1.08          | 0.01799 | -0.72         | 0.07700 |
| STM1807         | dsbB    | disulfide bond formation protein B                     | 0.32          | 0.61958 | 0.89          | 0.01119 | 0.19          | 0.64438 |
| STM1808         | STM1808 | putative cytoplasmic protein                           | 1.69          | 0.04085 | 3.62          | 0.00003 | 1.28          | 0.00524 |
| STM1808         | STM1808 | putative cytoplasmic protein                           | 1.27          | 0.02586 | 3.82          | 0.00009 | 2.60          | 0.00022 |
| STM1810         | STM1810 | putative cytoplasmic protein                           | 0.29          | 0.67888 | 1.51          | 0.00156 | 3.97          | 0.00009 |
| STM1810         | STM1810 | putative cytoplasmic protein                           | 0.63          | 0.32776 | 1.36          | 0.00521 | 4.45          | 0.00004 |
| STM1811         | ycgN    | hypothetical protein STM1811                           | -1.30         | 0.03961 | 0.26          | 0.49000 | 0.11          | 0.79934 |
| STM1811         | ycgN    | hypothetical protein STM1811                           | -0.63         | 0.15884 | 0.08          | 0.83569 | -0.08         | 0.83262 |
| STM1812         | ycgM    | putative fumarylacetoacetate hydrolase                 | -1.02         | 0.05333 | 0.69          | 0.09742 | -0.43         | 0.23526 |
| STM1812         | ycgM    | putative fumarylacetoacetate hydrolase                 | 0.55          | 0.43120 | 0.75          | 0.02354 | -0.01         | 0.98546 |
| STM1813         | ycgI    | putative cytoplasmic protein                           | -1.90         | 0.00908 | 0.00          | 0.99904 | -0.13         | 0.78971 |
| STM1813         | ycgI    | putative cytoplasmic protein                           | -0.78         | 0.10017 | -0.28         | 0.46133 | 0.24          | 0.55218 |
| STM1814         | minC    | septum formation inhibitor                             | -1.87         | 0.02504 | -0.33         | 0.28451 | -1.24         | 0.00621 |
| STM1814         | minC    | septum formation inhibitor                             | -1.14         | 0.08868 | -0.19         | 0.51062 | -1.11         | 0.01020 |

**Table S2.** Genome-wide expression of *Salmonella enterica* serovar Typhimurium inside fibroblasts

Intracellular WT 24 h p.i.      Intracellular *phoP* 24 h p.i.      Extracellular WT stationary phase

Relative to WT exponential LB      Relative to *phoP* exponential LB      Relative to WT exponential LB



| Systematic name | Gene      | Product                                           | log2Ratio (M) | p value | log2Ratio (M) | p value | log2Ratio (M) | p value |
|-----------------|-----------|---------------------------------------------------|---------------|---------|---------------|---------|---------------|---------|
| STM1815         | minD      | cell division inhibitor protein                   | -2.06         | 0.00949 | -0.03         | 0.93083 | -1.32         | 0.01032 |
| STM1815         | minD      | cell division inhibitor protein                   | -1.08         | 0.04573 | -0.04         | 0.90120 | -0.21         | 0.81712 |
| STM1816         | minE      | cell division topological specificity factor MinE | -2.18         | 0.00829 | -0.45         | 0.15984 | -0.82         | 0.04265 |
| STM1816         | minE      | cell division topological specificity factor MinE | -1.39         | 0.04046 | -1.14         | 0.03417 | -0.27         | 0.60201 |
| STM1817         | rnd       | RNase D                                           | -1.47         | 0.05699 | -0.49         | 0.15021 | -0.77         | 0.30331 |
| STM1817         | rnd       | RNase D                                           | -1.12         | 0.08626 | -1.23         | 0.00292 | -0.95         | 0.10889 |
| STM1818         | fadD      | acyl-CoA synthase                                 | 0.09          | 0.85422 | 0.06          | 0.84687 | 0.68          | 0.11386 |
| STM1818         | fadD      | acyl-CoA synthase                                 | 0.66          | 0.41995 | 0.06          | 0.86434 | 1.43          | 0.00482 |
| STM1819         | slp       | putative outer membrane protein                   | -1.78         | 0.01426 | -0.31         | 0.49020 | -0.46         | 0.42850 |
| STM1819         | slp       | putative outer membrane protein                   | -1.71         | 0.02945 | -1.07         | 0.00885 | -2.47         | 0.00122 |
| STM1820         | yeaZ      | putative molecular chaperone                      | -1.68         | 0.01397 | -0.23         | 0.41061 | -1.87         | 0.00104 |
| STM1820         | yeaZ      | putative molecular chaperone                      | -1.39         | 0.02009 | -0.07         | 0.83443 | -1.29         | 0.02447 |
| STM1821         | yoaA      | putative DNA helicase                             | -1.78         | 0.02346 | -0.44         | 0.67323 | -0.70         | 0.21693 |
| STM1821         | yoaA      | putative DNA helicase                             | -0.92         | 0.10364 | -1.38         | 0.00229 | -1.68         | 0.01567 |
| STM1822         | yoaB      | putative translation initiation inhibitor         | -0.87         | 0.23076 | 0.22          | 0.52929 | -0.11         | 0.83480 |
| STM1822         | yoaB      | putative translation initiation inhibitor         | -2.06         | 0.00979 | 0.04          | 0.89101 | -0.45         | 0.24961 |
| STM1823         | yoaH      | hypothetical protein STM1823                      | -1.20         | 0.08057 | -0.23         | 0.43148 | -1.69         | 0.00419 |
| STM1823         | yoaH      | hypothetical protein STM1823                      | 0.32          | 0.56470 | 0.09          | 0.82375 | -0.83         | 0.03964 |
| STM1824         | pabB      | para-aminobenzoate synthase component I           | -1.85         | 0.02510 | -0.01         | 0.98768 | -0.52         | 0.40643 |
| STM1824         | pabB      | para-aminobenzoate synthase component I           | -0.45         | 0.60804 | -0.26         | 0.43148 | -1.70         | 0.00221 |
| STM1825         | yeaB      | putative NTP pyrophosphohydrolase                 | -0.49         | 0.33086 | -1.44         | 0.04264 | -0.81         | 0.23439 |
| STM1825         | yeaB      | putative NTP pyrophosphohydrolase                 | -1.35         | 0.06974 | -1.30         | 0.00377 | -3.16         | 0.02669 |
| STM1826         | sdaA      | L-serine deaminase I/L-threonine deaminase I      | 1.55          | 0.02725 | -0.24         | 0.52090 | -0.29         | 0.61485 |
| STM1826         | sdaA      | L-serine deaminase I/L-threonine deaminase I      | 1.89          | 0.01451 | -0.16         | 0.70446 | 0.34          | 0.49610 |
| STM1827,S       | STM1827,S | putative diguanylate cyclase/phosphodiesterase    | 0.10          | 0.85094 | -0.57         | 0.19818 | 0.06          | 0.89351 |
| STM1827,S       | STM1827,S | putative diguanylate cyclase/phosphodiesterase    | 0.55          | 0.37699 | -0.77         | 0.03949 | 0.83          | 0.07569 |
| STM1828         | yoaE      | putative inner membrane protein                   | -0.30         | 0.62437 | -0.71         | 0.05230 | -0.10         | 0.87503 |
| STM1828         | yoaE      | putative inner membrane protein                   | 0.23          | 0.67110 | -0.31         | 0.33624 | 0.62          | 0.11668 |
| STM1830         | manX      | mannose-specific enzyme IIA                       | -1.72         | 0.03912 | 0.38          | 0.31259 | -1.29         | 0.02506 |
| STM1830         | manX      | mannose-specific enzyme IIA                       | -0.44         | 0.38785 | 0.53          | 0.13884 | -0.80         | 0.09267 |
| STM1831         | manY      | mannose-specific enzyme IIC                       | -1.60         | 0.07767 | -0.26         | 0.41177 | -1.07         | 0.04237 |
| STM1831         | manY      | mannose-specific enzyme IIC                       | -1.27         | 0.04769 | 0.48          | 0.22729 | -0.76         | 0.05771 |
| STM1832         | manZ      | mannose-specific enzyme IID                       | -0.99         | 0.06717 | -0.52         | 0.16760 | -0.33         | 0.38154 |
| STM1832         | manZ      | mannose-specific enzyme IID                       | -0.34         | 0.42403 | -0.45         | 0.12965 | -0.90         | 0.02696 |
| STM1833         | STM1833   | hypothetical protein STM1833                      | -1.34         | 0.04725 | -0.35         | 0.37591 | -1.10         | 0.01657 |
| STM1833         | STM1833   | hypothetical protein STM1833                      | 0.65          | 0.29204 | -0.21         | 0.59312 | 1.54          | 0.00243 |
| STM1834         | yebN      | putative transport protein                        | -0.35         | 0.75933 | 0.25          | 0.46986 | -0.44         | 0.28174 |
| STM1834         | yebN      | putative transport protein                        | 0.30          | 0.64337 | 0.11          | 0.71105 | -0.94         | 0.03025 |
| STM1835         | rrmA      | 23S rRNA m1G745 methyltransferase                 | -1.06         | 0.06501 | -0.13         | 0.66016 | 0.09          | 0.87248 |
| STM1835         | rrmA      | 23S rRNA m1G745 methyltransferase                 | 0.02          | 0.97348 | 0.00          | 0.99977 | -1.35         | 0.02245 |
| STM1836         | STM1836   | putative penicillin-binding protein 3             | -0.14         | 0.82886 | 0.19          | 0.65303 | -0.48         | 0.28586 |
| STM1836         | STM1836   | putative penicillin-binding protein 3             | 0.35          | 0.40927 | -0.98         | 0.21643 | 0.46          | 0.18300 |
| STM1837         | cspC      | cold shock protein                                | -3.63         | 0.00755 | -1.15         | 0.09337 | -0.74         | 0.06473 |
| STM1837         | cspC      | cold shock protein                                | -2.05         | 0.00821 | -0.74         | 0.13284 | -0.50         | 0.16188 |
| STM1839         | STM1839   | hypothetical protein STM1839                      | -0.87         | 0.64098 | -1.00         | 0.04875 | 0.12          | 0.89908 |
| STM1839         | STM1839   | hypothetical protein STM1839                      | 1.03          | 0.04754 | -1.29         | 0.00442 | -0.60         | 0.30898 |
| STM1840         | yobG      | putative inner membrane protein                   | -0.72         | 0.19770 | -0.79         | 0.01902 | -0.14         | 0.80699 |
| STM1840         | yobG      | putative inner membrane protein                   | -0.97         | 0.13075 | -0.93         | 0.03027 | -0.97         | 0.27698 |
| STM1841         | STM1841   | hypothetical protein STM1841                      | -1.11         | 0.10448 | -1.17         | 0.00631 | -0.19         | 0.63989 |
| STM1841         | STM1841   | hypothetical protein STM1841                      | 0.22          | 0.69822 | -0.26         | 0.44521 | -0.02         | 0.97999 |
| STM1842         | kdgR      | putative transcriptional repressor                | -2.08         | 0.01228 | -0.17         | 0.76216 | -1.42         | 0.05107 |
| STM1842         | kdgR      | putative transcriptional repressor                | -1.24         | 0.22569 | -0.53         | 0.16025 | -1.55         | 0.02513 |
| STM1843         | STM1843   | putative transport protein                        | -0.85         | 0.26308 | -0.20         | 0.71216 | -0.23         | 0.62668 |
| STM1843         | STM1843   | putative transport protein                        | 0.34          | 0.51786 | 0.88          | 0.01533 | 0.14          | 0.73607 |
| STM1844         | htpX      | heat shock protein HtpX                           | 1.05          | 0.06251 | 2.34          | 0.00010 | 1.48          | 0.00270 |
| STM1844         | htpX      | heat shock protein HtpX                           | 1.79          | 0.01417 | 1.91          | 0.00128 | 2.60          | 0.00021 |
| STM1845         | prc       | carboxy-terminal protease                         | 0.65          | 0.34370 | 0.52          | 0.08354 | -0.24         | 0.58229 |
| STM1845         | prc       | carboxy-terminal protease                         | 1.89          | 0.01731 | -0.16         | 0.65018 | 0.71          | 0.07771 |
| STM1846         | proQ      | putative solute/DNA competence effector           | -3.60         | 0.02148 | -1.51         | 0.00188 | -3.56         | 0.00009 |
| STM1846         | proQ      | putative solute/DNA competence effector           | -2.90         | 0.01102 | -1.37         | 0.00140 | -4.51         | 0.00163 |
| STM1847         | yebR      | putative nucleotide-binding protein               | -3.12         | 0.00932 | -1.50         | 0.00316 | -2.67         | 0.00020 |
| STM1847         | yebR      | putative nucleotide-binding protein               | -1.95         | 0.18439 | -1.48         | 0.00293 | -3.08         | 0.00143 |
| STM1848         | yebS      | putative inner membrane protein                   | -1.28         | 0.03725 | -0.97         | 0.01712 | -0.07         | 0.87847 |
| STM1848         | yebS      | putative inner membrane protein                   | 1.23          | 0.07213 | -0.43         | 0.13836 | 1.44          | 0.01622 |
| STM1849         | STM1849   | putative inner membrane protein                   | -0.08         | 0.85530 | -0.13         | 0.70041 | -0.16         | 0.76703 |
| STM1849         | STM1849   | putative inner membrane protein                   | 1.27          | 0.32499 | 0.38          | 0.54376 | 1.04          | 0.01772 |
| STM1850         | yebU      | putative rRNA methyltransferase                   | -1.13         | 0.05160 | -0.49         | 0.10650 | 0.03          | 0.93658 |
| STM1850         | yebU      | putative rRNA methyltransferase                   | -1.30         | 0.03486 | -0.48         | 0.18218 | 0.23          | 0.73581 |
| STM1851         | STM1851   | putative cytoplasmic protein                      | -0.84         | 0.18861 | 0.47          | 0.14193 | 1.76          | 0.00269 |
| STM1851         | STM1851   | putative cytoplasmic protein                      | -0.30         | 0.71390 | 0.25          | 0.44193 | 1.87          | 0.00243 |

|                 |            |                                              | Intracellular WT<br>24 h p.i.                                                      |         | Intracellular <i>phoP</i><br>24 h p.i.                                              |         | Extracellular WT<br>stationary phase                                                |         |
|-----------------|------------|----------------------------------------------|------------------------------------------------------------------------------------|---------|-------------------------------------------------------------------------------------|---------|-------------------------------------------------------------------------------------|---------|
|                 |            |                                              | Relative to WT<br>exponential LB                                                   |         | Relative to <i>phoP</i><br>exponential LB                                           |         | Relative to WT<br>exponential LB                                                    |         |
|                 |            |                                              |  |         |  |         |  |         |
| Systematic name | Gene       | Product                                      | log2Ratio (M)                                                                      | p value | log2Ratio (M)                                                                       | p value | log2Ratio (M)                                                                       | p value |
| STM1852         | yebW       | putative inner membrane lipoprotein          | -0.09                                                                              | 0.94318 | 0.97                                                                                | 0.01618 | 2.42                                                                                | 0.00023 |
| STM1852         | yebW       | putative inner membrane lipoprotein          | -0.48                                                                              | 0.68800 | 1.25                                                                                | 0.01120 | 2.27                                                                                | 0.00035 |
| STM1853         | prpA       | serine/threonine protein phosphatase         | -0.62                                                                              | 0.21115 | 0.10                                                                                | 0.77806 | 0.57                                                                                | 0.16687 |
| STM1853         | prpA       | serine/threonine protein phosphatase         | 0.66                                                                               | 0.13418 | -0.10                                                                               | 0.90452 | 1.79                                                                                | 0.00130 |
| STM1854         | STM1854    | putative inner membrane protein              | 0.76                                                                               | 0.26577 | -0.99                                                                               | 0.32335 | 0.19                                                                                | 0.65782 |
| STM1854         | STM1854    | putative inner membrane protein              | 1.82                                                                               | 0.01337 | -0.21                                                                               | 0.64761 | 0.35                                                                                | 0.57935 |
| STM1855         | sopE2      | type III-secreted effector protein           | -1.15                                                                              | 0.04188 | -0.60                                                                               | 0.26022 | 0.06                                                                                | 0.92946 |
| STM1855         | sopE2      | type III-secreted effector protein           | 1.04                                                                               | 0.39698 | -0.66                                                                               | 0.08631 | 0.98                                                                                | 0.03911 |
| STM1856         | STM1856    | putative cytoplasmic protein                 | 0.00                                                                               | 0.99756 | -1.25                                                                               | 0.00617 | -0.01                                                                               | 0.98975 |
| STM1856         | STM1856    | putative cytoplasmic protein                 | 0.62                                                                               | 0.55723 | 0.72                                                                                | 0.13437 | -0.65                                                                               | 0.15222 |
| STM1856,1N      | STM1856,1N | hypothetical protein STM1856,1N              | -0.14                                                                              | 0.88020 | -0.21                                                                               | 0.60479 | -1.39                                                                               | 0.02263 |
| STM1856,1N      | STM1856,1N | hypothetical protein STM1856,1N              | 1.51                                                                               | 0.07036 | -0.23                                                                               | 0.57302 | -0.07                                                                               | 0.90484 |
| STM1857         | STM1857    | putative acetyltransferase                   | -1.14                                                                              | 0.04794 | 0.67                                                                                | 0.07107 | -0.83                                                                               | 0.16527 |
| STM1857         | STM1857    | putative acetyltransferase                   | -0.15                                                                              | 0.85913 | 0.64                                                                                | 0.05332 | -0.80                                                                               | 0.04702 |
| STM1862         | pagO       | integral membrane protein                    | 0.84                                                                               | 0.08901 | -0.10                                                                               | 0.81073 | -0.49                                                                               | 0.37291 |
| STM1862         | pagO       | integral membrane protein                    | 3.44                                                                               | 0.04484 | 0.76                                                                                | 0.06617 | 1.78                                                                                | 0.00120 |
| STM1863         | STM1863    | putative inner membrane protein              | 2.17                                                                               | 0.10685 | 0.99                                                                                | 0.04344 | 2.63                                                                                | 0.00096 |
| STM1863         | STM1863    | putative inner membrane protein              | 1.95                                                                               | 0.06312 | 0.07                                                                                | 0.91744 | 3.80                                                                                | 0.00011 |
| STM1864         | STM1864    | putative inner membrane protein              | 0.32                                                                               | 0.64305 | 1.11                                                                                | 0.58424 | 0.09                                                                                | 0.92833 |
| STM1864         | STM1864    | putative inner membrane protein              | -0.03                                                                              | 0.94892 | -1.09                                                                               | 0.03586 | -1.51                                                                               | 0.14983 |
| STM1868         | mig-3      | phage-tail assembly-like protein             | 3.84                                                                               | 0.00512 | 2.56                                                                                | 0.00020 | 2.42                                                                                | 0.01269 |
| STM1868         | mig-3      | phage-tail assembly-like protein             | 4.72                                                                               | 0.00512 | 2.15                                                                                | 0.00173 | 3.31                                                                                | 0.00227 |
| STM1868,1N      | STM1868,1N | hypothetical protein STM1868,1N              | 1.84                                                                               | 0.01814 | 1.73                                                                                | 0.00085 | 1.44                                                                                | 0.09105 |
| STM1868,1N      | STM1868,1N | hypothetical protein STM1868,1N              | 2.79                                                                               | 0.00673 | 1.75                                                                                | 0.00061 | 2.06                                                                                | 0.00182 |
| STM1868A        | STM1868A   | lytic enzyme                                 | 0.34                                                                               | 0.61112 | 4.42                                                                                | 0.00001 | 2.61                                                                                | 0.00186 |
| STM1868A        | STM1868A   | lytic enzyme                                 | 1.39                                                                               | 0.10320 | 3.97                                                                                | 0.00008 | -0.10                                                                               | 0.88432 |
| STM1869         | STM1869    | phage-tail assembly-like protein             | 5.63                                                                               | 0.00512 | 2.60                                                                                | 0.00115 | 2.47                                                                                | 0.00190 |
| STM1869         | STM1869    | phage-tail assembly-like protein             | 2.63                                                                               | 0.01462 | 2.26                                                                                | 0.00261 | 2.91                                                                                | 0.00570 |
| STM1870         | STM1870    | RecE-like protein                            | 0.45                                                                               | 0.56732 | -0.26                                                                               | 0.57058 | 0.63                                                                                | 0.34915 |
| STM1870         | STM1870    | RecE-like protein                            | 2.58                                                                               | 0.05410 | -0.11                                                                               | 0.70668 | 3.19                                                                                | 0.00334 |
| STM1873         | STM1873    | hypothetical protein STM1873                 | -0.95                                                                              | 0.12653 | 0.16                                                                                | 0.60377 | -0.59                                                                               | 0.29164 |
| STM1873         | STM1873    | hypothetical protein STM1873                 | -0.70                                                                              | 0.18021 | -0.33                                                                               | 0.41212 | 0.54                                                                                | 0.20027 |
| STM1874         | STM1874    | putative inner membrane protein              | -1.12                                                                              | 0.04842 | 0.64                                                                                | 0.05785 | -1.04                                                                               | 0.03539 |
| STM1874         | STM1874    | putative inner membrane protein              | -0.19                                                                              | 0.74567 | 0.73                                                                                | 0.03854 | -0.65                                                                               | 0.14903 |
| STM1875         | yobA       | putative copper resistance protein           | -0.14                                                                              | 0.72496 | 0.31                                                                                | 0.46715 | 1.82                                                                                | 0.05659 |
| STM1875         | yobA       | putative copper resistance protein           | 1.02                                                                               | 0.09516 | 0.58                                                                                | 0.12153 | 0.83                                                                                | 0.06344 |
| STM1876         | holE       | DNA polymerase III theta subunit             | -1.39                                                                              | 0.10817 | -0.39                                                                               | 0.30610 | -0.08                                                                               | 0.92980 |
| STM1876         | holE       | DNA polymerase III theta subunit             | 0.04                                                                               | 0.94969 | 1.30                                                                                | 0.01056 | 0.64                                                                                | 0.68554 |
| STM1877         | STM1877    | putative amidohydrolase                      | -0.13                                                                              | 0.84826 | -0.68                                                                               | 0.06537 | -0.98                                                                               | 0.07416 |
| STM1877         | STM1877    | putative amidohydrolase                      | 0.06                                                                               | 0.91683 | -0.64                                                                               | 0.30956 | 0.28                                                                                | 0.53860 |
| STM1878         | exoX       | exodeoxyribonuclease X                       | 0.53                                                                               | 0.21339 | 1.68                                                                                | 0.00064 | 0.58                                                                                | 0.12857 |
| STM1878         | exoX       | exodeoxyribonuclease X                       | 0.23                                                                               | 0.71556 | 1.24                                                                                | 0.00296 | 0.43                                                                                | 0.27486 |
| STM1879         | ptrB       | protease II                                  | -1.13                                                                              | 0.06705 | 1.03                                                                                | 0.03417 | -0.69                                                                               | 0.10342 |
| STM1879         | ptrB       | protease II                                  | 1.02                                                                               | 0.07746 | 0.99                                                                                | 0.02051 | 0.55                                                                                | 0.18104 |
| STM1880         | yebE       | putative inner membrane protein              | 1.38                                                                               | 0.08296 | 3.49                                                                                | 0.00006 | 2.72                                                                                | 0.00026 |
| STM1880         | yebE       | putative inner membrane protein              | 2.25                                                                               | 0.02603 | 3.44                                                                                | 0.00003 | 3.37                                                                                | 0.00046 |
| STM1881         | yebF       | putative periplasmic protein                 | 0.58                                                                               | 0.47178 | 2.43                                                                                | 0.00012 | 1.09                                                                                | 0.01219 |
| STM1881         | yebF       | putative periplasmic protein                 | 0.69                                                                               | 0.51936 | 2.28                                                                                | 0.00090 | 1.59                                                                                | 0.00777 |
| STM1882         | yebG       | DNA damage-inducible protein                 | 2.11                                                                               | 0.01091 | 2.46                                                                                | 0.00013 | 1.09                                                                                | 0.01398 |
| STM1882         | yebG       | DNA damage-inducible protein                 | 2.87                                                                               | 0.01545 | 2.70                                                                                | 0.00019 | 1.97                                                                                | 0.00281 |
| STM1883         | purT       | 5'-phosphoribosylglycinamide transformylase  | 3.02                                                                               | 0.00743 | 1.13                                                                                | 0.00564 | 4.00                                                                                | 0.00027 |
| STM1883         | purT       | 5'-phosphoribosylglycinamide transformylase  | 3.25                                                                               | 0.00558 | 0.43                                                                                | 0.39177 | 4.70                                                                                | 0.00004 |
| STM1884         | eda        | keto-hydroxyglutarate-aldolase/keto-deoxy-   | -0.69                                                                              | 0.19051 | -0.05                                                                               | 0.89573 | -2.22                                                                               | 0.00091 |
| STM1884         | eda        | keto-hydroxyglutarate-aldolase/keto-deoxy-   | 0.61                                                                               | 0.19050 | 0.47                                                                                | 0.09592 | -1.43                                                                               | 0.01638 |
| STM1885         | edd        | phosphogluconate dehydratase                 | -1.01                                                                              | 0.09487 | -0.19                                                                               | 0.61557 | -2.30                                                                               | 0.00054 |
| STM1885         | edd        | phosphogluconate dehydratase                 | -0.01                                                                              | 0.97537 | 0.12                                                                                | 0.67595 | -2.02                                                                               | 0.00099 |
| STM1886         | zwf        | glucose-6-phosphate 1-dehydrogenase          | -0.72                                                                              | 0.12200 | -0.20                                                                               | 0.52151 | -1.12                                                                               | 0.01993 |
| STM1886         | zwf        | glucose-6-phosphate 1-dehydrogenase          | 1.05                                                                               | 0.13203 | -0.01                                                                               | 0.97851 | -0.09                                                                               | 0.87168 |
| STM1887         | yebK       | putative transcriptional regulator           | -0.95                                                                              | 0.14579 | 0.40                                                                                | 0.29174 | 0.08                                                                                | 0.91754 |
| STM1887         | yebK       | putative transcriptional regulator           | 0.33                                                                               | 0.47263 | 0.04                                                                                | 0.90527 | 0.86                                                                                | 0.03093 |
| STM1888         | pykA       | pyruvate kinase                              | -0.76                                                                              | 0.17822 | -0.77                                                                               | 0.05138 | -1.33                                                                               | 0.00470 |
| STM1888         | pykA       | pyruvate kinase                              | -0.96                                                                              | 0.05424 | -0.49                                                                               | 0.10315 | -0.42                                                                               | 0.33028 |
| STM1889         | msbB       | lipid A biosynthesis lauroyl acyltransferase | -1.29                                                                              | 0.06515 | -0.93                                                                               | 0.03416 | -0.72                                                                               | 0.12561 |
| STM1889         | msbB       | lipid A biosynthesis lauroyl acyltransferase | -0.13                                                                              | 0.86139 | -0.30                                                                               | 0.39724 | -0.09                                                                               | 0.84249 |
| STM1890         | yebA       | putative peptidase                           | -1.04                                                                              | 0.13234 | -0.02                                                                               | 0.96555 | -0.59                                                                               | 0.15751 |
| STM1890         | yebA       | putative peptidase                           | -0.74                                                                              | 0.14975 | -0.47                                                                               | 0.18168 | -1.28                                                                               | 0.08634 |
| STM1891         | znuA       | high-affinity Zn transport protein           | -1.16                                                                              | 0.10292 | 0.77                                                                                | 0.03417 | -0.58                                                                               | 0.17232 |
| STM1891         | znuA       | high-affinity Zn transport protein           | 0.11                                                                               | 0.81005 | 0.96                                                                                | 0.01350 | -0.06                                                                               | 0.88311 |
| STM1892,S       | znuC       | high-affinity Zn transport protein           | -0.80                                                                              | 0.32005 | 0.12                                                                                | 0.81238 | -2.02                                                                               | 0.00130 |
| STM1892,S       | znuC       | high-affinity Zn transport protein           | -0.18                                                                              | 0.85345 | -0.62                                                                               | 0.04372 | -0.78                                                                               | 0.07178 |

**Table S2.** Genome-wide expression of *Salmonella enterica* serovar Typhimurium inside fibroblasts

Intracellular WT 24 h.p.i.      Intracellular *phoP* 24 h.p.i.      Extracellular WT stationary phase

Relative to WT exponential LB      Relative to *phoP* exponential LB      Relative to WT exponential LB



| Systematic name | Gene    | Product                                      | log2Ratio (M) | p value | log2Ratio (M) | p value | log2Ratio (M) | p value |
|-----------------|---------|----------------------------------------------|---------------|---------|---------------|---------|---------------|---------|
| STM1893         | znuB    | high-affinity Zn transport protein           | 0.21          | 0.69269 | -0.40         | 0.41534 | -0.87         | 0.12063 |
| STM1893         | znuB    | high-affinity Zn transport protein           | 2.35          | 0.06965 | 0.19          | 0.63567 | -1.00         | 0.10763 |
| STM1894         | ruvB    | Holliday junction DNA helicase RuvB          | -0.66         | 0.19208 | -0.54         | 0.08898 | -1.45         | 0.01077 |
| STM1894         | ruvB    | Holliday junction DNA helicase RuvB          | 0.66          | 0.16914 | -0.09         | 0.82055 | -0.81         | 0.08815 |
| STM1895         | ruvA    | Holliday junction DNA helicase motor protein | -0.46         | 0.26712 | 0.36          | 0.31213 | -1.69         | 0.00458 |
| STM1895         | ruvA    | Holliday junction DNA helicase motor protein | 0.50          | 0.43590 | 0.40          | 0.35577 | -1.32         | 0.02497 |
| STM1896         | STM1896 | putative cytoplasmic protein                 | 0.45          | 0.60796 | -2.60         | 0.00025 | -0.64         | 0.18380 |
| STM1896         | STM1896 | putative cytoplasmic protein                 | 1.39          | 0.04624 | -2.49         | 0.01065 | 0.77          | 0.13039 |
| STM1897         | yebB    | putative periplasmic protein                 | -1.08         | 0.11510 | -0.64         | 0.08374 | -2.09         | 0.00217 |
| STM1897         | yebB    | putative periplasmic protein                 | -0.61         | 0.15195 | -0.61         | 0.08556 | -1.81         | 0.00130 |
| STM1898         | ruvC    | Holliday junction resolvase                  | -1.31         | 0.04312 | -0.57         | 0.07316 | -1.46         | 0.00903 |
| STM1898         | ruvC    | Holliday junction resolvase                  | -1.55         | 0.01547 | -0.26         | 0.34032 | -1.90         | 0.00103 |
| STM1899         | yebC    | hypothetical protein STM1899                 | -1.97         | 0.03039 | -1.00         | 0.13266 | -2.69         | 0.00189 |
| STM1899         | yebC    | hypothetical protein STM1899                 | -0.26         | 0.63739 | -0.79         | 0.06829 | -2.05         | 0.01183 |
| STM1900         | ntpA    | dATP pyrophosphohydrolase                    | -2.75         | 0.03103 | -0.83         | 0.02165 | -2.80         | 0.00020 |
| STM1900         | ntpA    | dATP pyrophosphohydrolase                    | -1.78         | 0.01808 | -0.76         | 0.03152 | -3.52         | 0.00419 |
| STM1901         | aspS    | aspartyl-tRNA synthetase                     | -2.35         | 0.00753 | -0.31         | 0.46401 | -3.70         | 0.00008 |
| STM1901         | aspS    | aspartyl-tRNA synthetase                     | -1.04         | 0.04983 | -0.12         | 0.70432 | -3.29         | 0.00008 |
| STM1902         | yecD    | putative isochorismatase                     | -1.10         | 0.04151 | -0.40         | 0.20524 | -1.26         | 0.00564 |
| STM1902         | yecD    | putative isochorismatase                     | 0.28          | 0.50253 | -0.04         | 0.88848 | -0.40         | 0.40102 |
| STM1903         | yecE    | putative cytoplasmic protein                 | -0.98         | 0.05901 | -1.03         | 0.00754 | -0.75         | 0.05454 |
| STM1903         | yecE    | putative cytoplasmic protein                 | -0.10         | 0.83590 | -1.39         | 0.00955 | -0.12         | 0.92529 |
| STM1904         | yecN    | putative inner membrane protein              | -1.67         | 0.02124 | -0.97         | 0.02354 | -1.75         | 0.00811 |
| STM1904         | yecN    | putative inner membrane protein              | -1.01         | 0.05001 | -0.73         | 0.02933 | -1.90         | 0.00126 |
| STM1905         | yecO    | putative SAM-dependent methyltransferase     | -2.30         | 0.00689 | -0.97         | 0.00834 | -2.22         | 0.00035 |
| STM1905         | yecO    | putative SAM-dependent methyltransferase     | -2.20         | 0.00766 | -1.17         | 0.00446 | -2.13         | 0.00053 |
| STM1906         | yecP    | putative enzyme                              | -0.10         | 0.85599 | -0.13         | 0.70537 | 0.18          | 0.86159 |
| STM1906         | yecP    | putative enzyme                              | -0.12         | 0.88354 | -0.85         | 0.08590 | -0.04         | 0.95259 |
| STM1907         | cutC    | copper homeostasis protein                   | 0.16          | 0.83879 | 0.55          | 0.10650 | 1.24          | 0.02189 |
| STM1907         | cutC    | copper homeostasis protein                   | 0.93          | 0.13232 | 0.08          | 0.85765 | 1.85          | 0.00145 |
| STM1908         | yecM    | putative cytoplasmic protein                 | -1.40         | 0.03953 | -0.31         | 0.63837 | -1.41         | 0.00412 |
| STM1908         | yecM    | putative cytoplasmic protein                 | -1.25         | 0.06811 | -1.06         | 0.01963 | -0.95         | 0.04177 |
| STM1909         | argS    | arginyl-tRNA synthetase                      | -1.17         | 0.05944 | 0.08          | 0.76642 | -0.88         | 0.21366 |
| STM1909         | argS    | arginyl-tRNA synthetase                      | -0.74         | 0.29367 | -0.56         | 0.06202 | -1.57         | 0.00712 |
| STM1910         | STM1910 | putative penicillin-binding protein          | 0.11          | 0.84070 | -0.24         | 0.57934 | -0.18         | 0.70266 |
| STM1910         | STM1910 | putative penicillin-binding protein          | 1.34          | 0.10547 | -0.21         | 0.70208 | 2.03          | 0.01824 |
| STM1911         | STM1911 | putative cytoplasmic protein                 | -0.67         | 0.20370 | 0.31          | 0.48885 | 1.26          | 0.07759 |
| STM1911         | STM1911 | putative cytoplasmic protein                 | 0.41          | 0.64286 | 0.20          | 0.54813 | 0.72          | 0.12023 |
| STM1912         | flhE    | flagellar protein                            | -1.39         | 0.07470 | -2.09         | 0.00603 | -1.62         | 0.02020 |
| STM1912         | flhE    | flagellar protein                            | -1.23         | 0.24936 | -1.98         | 0.00086 | -1.82         | 0.04888 |
| STM1913         | flhA    | flagellar biosynthesis protein               | -1.83         | 0.01114 | -1.75         | 0.01786 | -0.85         | 0.04600 |
| STM1913         | flhA    | flagellar biosynthesis protein               | -0.40         | 0.74417 | -2.20         | 0.00052 | -1.55         | 0.00219 |
| STM1914         | flhB    | flagellar biosynthesis protein               | -2.35         | 0.00661 | -3.89         | 0.01093 | -3.06         | 0.00035 |
| STM1914         | flhB    | flagellar biosynthesis protein               | -0.35         | 0.54812 | -2.92         | 0.00019 | -1.06         | 0.01651 |
| STM1915         | cheZ    | chemotactic response protein                 | -3.21         | 0.00546 | -3.58         | 0.00003 | -3.18         | 0.00013 |
| STM1915         | cheZ    | chemotactic response protein                 | -1.08         | 0.13203 | -3.98         | 0.00001 | -2.82         | 0.00024 |
| STM1916         | cheY    | chemotaxis regulator                         | -5.49         | 0.00512 | -5.08         | 0.00000 | -5.28         | 0.00006 |
| STM1916         | cheY    | chemotaxis regulator                         | -3.66         | 0.00537 | -4.53         | 0.00002 | -4.42         | 0.00006 |
| STM1917         | cheB    | chemotaxis-specific methyltransferase        | -4.75         | 0.00512 | -5.07         | 0.00000 | -5.74         | 0.00001 |
| STM1917         | cheB    | chemotaxis-specific methyltransferase        | -3.90         | 0.00541 | -5.48         | 0.00000 | -5.02         | 0.00005 |
| STM1918         | cheR    | glutamate methyltransferase                  | -1.09         | 0.03878 | -4.12         | 0.00001 | -3.12         | 0.00235 |
| STM1918         | cheR    | glutamate methyltransferase                  | -2.14         | 0.00774 | -4.72         | 0.00003 | -3.02         | 0.00439 |
| STM1919         | cheM    | methyl accepting chemotaxis protein II       | -3.22         | 0.00547 | -4.48         | 0.00001 | -3.08         | 0.00025 |
| STM1919         | cheM    | methyl accepting chemotaxis protein II       | -1.73         | 0.04036 | -3.45         | 0.00004 | -3.75         | 0.00014 |
| STM1920         | cheW    | chemotaxis docking protein                   | -1.93         | 0.02171 | -1.45         | 0.09455 | -1.69         | 0.00256 |
| STM1920         | cheW    | chemotaxis docking protein                   | -1.67         | 0.18852 | -3.32         | 0.00004 | -3.19         | 0.00602 |
| STM1921         | cheA    | chemotaxis sensory histidine protein kinase  | -3.61         | 0.00753 | -4.08         | 0.00006 | -3.61         | 0.00007 |
| STM1921         | cheA    | chemotaxis sensory histidine protein kinase  | -3.19         | 0.00818 | -3.89         | 0.00001 | -4.12         | 0.00004 |
| STM1922         | motB    | flagellar motor protein                      | -2.77         | 0.00689 | -2.97         | 0.01120 | -4.39         | 0.00050 |
| STM1922         | motB    | flagellar motor protein                      | -2.58         | 0.01319 | -3.71         | 0.00008 | -4.72         | 0.00553 |
| STM1923         | motA    | flagellar motor protein                      | -1.72         | 0.03161 | -2.43         | 0.00013 | -2.03         | 0.01060 |
| STM1923         | motA    | flagellar motor protein                      | -0.42         | 0.57773 | -2.92         | 0.00008 | -1.11         | 0.02639 |
| STM1924,S       | flhC    | flagellar transcriptional activator          | -2.57         | 0.00768 | -1.22         | 0.00277 | -0.91         | 0.05584 |
| STM1924,S       | flhC    | flagellar transcriptional activator          | -1.39         | 0.05350 | -1.64         | 0.00478 | -0.77         | 0.11140 |
| STM1925         | flhD    | transcriptional activator FlhD               | -1.46         | 0.04296 | 0.39          | 0.28718 | -0.97         | 0.05594 |
| STM1925         | flhD    | transcriptional activator FlhD               | -0.50         | 0.36030 | 0.55          | 0.15826 | -1.18         | 0.11698 |
| STM1927         | yecG    | putative universal stress protein            | -0.25         | 0.70286 | 0.06          | 0.88193 | 0.66          | 0.09479 |
| STM1927         | yecG    | putative universal stress protein            | 0.06          | 0.90764 | 0.05          | 0.88515 | 1.19          | 0.01015 |
| STM1928         | otsA    | trehalose-6-phosphate synthase               | 2.06          | 0.07172 | -1.43         | 0.00418 | 1.63          | 0.11118 |
| STM1928         | otsA    | trehalose-6-phosphate synthase               | 1.50          | 0.07863 | -1.54         | 0.00109 | 1.89          | 0.06818 |

**Table S2.** Genome-wide expression of *Salmonella enterica* serovar Typhimurium inside fibroblasts

Intracellular WT 24 h p.i.      Intracellular *phoP* 24 h p.i.      Extracellular WT stationary phase

Relative to WT exponential LB      Relative to *phoP* exponential LB      Relative to WT exponential LB



| Systematic name | Gene    | Product                                             | log2Ratio (M) | p value | log2Ratio (M) | p value | log2Ratio (M) | p value |
|-----------------|---------|-----------------------------------------------------|---------------|---------|---------------|---------|---------------|---------|
| STM1929         | otsB    | trehalose-6-phosphate phosphatase                   | 0.90          | 0.16362 | 2.95          | 0.00009 | 3.51          | 0.00014 |
| STM1929         | otsB    | trehalose-6-phosphate phosphatase                   | 1.83          | 0.06001 | 2.74          | 0.00034 | 5.27          | 0.00003 |
| STM1931         | araH    | putative intracellular protease/amidase             | -0.84         | 0.28542 | -0.08         | 0.85737 | 2.36          | 0.00621 |
| STM1931         | araH    | putative intracellular protease/amidase             | 0.75          | 0.25242 | -1.00         | 0.01533 | 3.04          | 0.00016 |
| STM1932         | ftnB    | ferritin-like protein                               | -0.04         | 0.94879 | 0.80          | 0.04298 | 0.06          | 0.91352 |
| STM1932         | ftnB    | ferritin-like protein                               | 1.83          | 0.07329 | 0.91          | 0.04772 | 1.24          | 0.03940 |
| STM1933         | STM1933 | hypothetical protein STM1933                        | 0.82          | 0.15894 | 0.46          | 0.10373 | 0.76          | 0.08841 |
| STM1933         | STM1933 | hypothetical protein STM1933                        | 1.45          | 0.02435 | 0.56          | 0.17100 | 1.28          | 0.01647 |
| STM1934         | STM1934 | putative outer membrane lipoprotein                 | -1.16         | 0.05040 | -1.16         | 0.15093 | -0.87         | 0.09520 |
| STM1934         | STM1934 | putative outer membrane lipoprotein                 | -0.75         | 0.31231 | -1.55         | 0.00254 | -1.31         | 0.06191 |
| STM1935         | ftn     | cytoplasmic ferritin                                | -1.86         | 0.01713 | -1.57         | 0.00147 | -2.68         | 0.00135 |
| STM1935         | ftn     | cytoplasmic ferritin                                | -1.04         | 0.13364 | -1.32         | 0.00189 | -2.24         | 0.00881 |
| STM1936         | yecH    | putative cytoplasmic protein                        | -1.41         | 0.02108 | -0.54         | 0.24399 | -0.96         | 0.04041 |
| STM1936         | yecH    | putative cytoplasmic protein                        | -1.30         | 0.16100 | -1.97         | 0.00751 | -2.75         | 0.00255 |
| STM1937         | tyrP    | tyrosine-specific transport protein                 | -0.93         | 0.18749 | 0.25          | 0.37591 | -0.01         | 0.98406 |
| STM1937         | tyrP    | tyrosine-specific transport protein                 | -0.35         | 0.53849 | -0.25         | 0.39589 | -1.33         | 0.11111 |
| STM1938         | yecA    | putative metal-binding protein                      | 0.34          | 0.46969 | 0.62          | 0.06956 | -0.56         | 0.27532 |
| STM1938         | yecA    | putative metal-binding protein                      | 1.37          | 0.07476 | 0.77          | 0.03337 | 0.78          | 0.07118 |
| STM1939         | STM1939 | putative glucose-6-phosphate dehydrogenase          | 0.28          | 0.70745 | -0.96         | 0.12341 | -1.94         | 0.00074 |
| STM1939         | STM1939 | putative glucose-6-phosphate dehydrogenase          | 0.87          | 0.07451 | -0.01         | 0.97347 | -0.74         | 0.24139 |
| STM1940         | STM1940 | putative cell wall-associated hydrolase             | 0.00          | 0.99251 | 3.43          | 0.00004 | 1.06          | 0.12800 |
| STM1940         | STM1940 | putative cell wall-associated hydrolase             | 1.06          | 0.24690 | 0.09          | 0.89964 | 1.64          | 0.03331 |
| STM1941         | STM1941 | putative inner membrane protein                     | -0.44         | 0.28122 | -0.93         | 0.20359 | -1.47         | 0.00297 |
| STM1941         | STM1941 | putative inner membrane protein                     | -1.34         | 0.12742 | -1.59         | 0.00060 | -1.30         | 0.02050 |
| STM1942         | leuZ    | STM1942                                             | -1.70         | 0.01363 | -0.95         | 0.02199 | -0.07         | 0.85763 |
| STM1942         | leuZ    | STM1942                                             | 0.53          | 0.59985 | -1.15         | 0.02253 | 0.41          | 0.40102 |
| STM1943         | cysT    | STM1943                                             | -2.80         | 0.00789 | -0.72         | 0.21819 | 2.92          | 0.00020 |
| STM1943         | cysT    | STM1943                                             | -2.90         | 0.02344 | -0.99         | 0.02486 | 3.12          | 0.00009 |
| STM1944         | glyW    | STM1944                                             | -1.12         | 0.13062 | -0.34         | 0.46927 | 0.23          | 0.61447 |
| STM1944         | glyW    | STM1944                                             | -1.15         | 0.04748 | -0.64         | 0.10969 | 0.32          | 0.46475 |
| STM1945         | pgsA    | phosphatidylglycerophosphate synthetase             | -1.80         | 0.02394 | -0.70         | 0.05138 | -1.48         | 0.00291 |
| STM1945         | pgsA    | phosphatidylglycerophosphate synthetase             | -1.86         | 0.05448 | -0.70         | 0.06206 | -1.00         | 0.05703 |
| STM1946         | uvrC    | excinuclease ABC subunit C                          | 1.75          | 0.41865 | 0.08          | 0.82326 | 0.62          | 0.59806 |
| STM1946         | uvrC    | excinuclease ABC subunit C                          | -0.18         | 0.76118 | 0.05          | 0.90780 | 1.71          | 0.12190 |
| STM1947         | uvrY    | response regulator                                  | -1.84         | 0.01854 | 0.31          | 0.40413 | -0.60         | 0.19330 |
| STM1947         | uvrY    | response regulator                                  | -0.83         | 0.15665 | 0.09          | 0.75820 | 0.02          | 0.97275 |
| STM1949         | yecF    | putative cytoplasmic protein                        | -0.22         | 0.68166 | -1.17         | 0.00399 | -1.07         | 0.08450 |
| STM1949         | yecF    | putative cytoplasmic protein                        | 1.36          | 0.05716 | -0.91         | 0.02138 | -0.54         | 0.25165 |
| STM1950         | sdiA    | transcriptional regulator                           | -0.91         | 0.22810 | -0.79         | 0.03083 | 0.24          | 0.65697 |
| STM1950         | sdiA    | transcriptional regulator                           | -0.15         | 0.73008 | -0.47         | 0.22962 | -0.62         | 0.22460 |
| STM1951         | yecC    | putative ABC-type polar amino acid transport system | -1.56         | 0.03603 | 0.90          | 0.25757 | 0.11          | 0.79744 |
| STM1951         | yecC    | putative ABC-type polar amino acid transport system | 1.17          | 0.52384 | -0.91         | 0.40241 | -1.67         | 0.01906 |
| STM1952         | yecS    | putative ABC-type amino acid transporter permease   | -1.15         | 0.04196 | 0.50          | 0.10280 | -0.29         | 0.54205 |
| STM1952         | yecS    | putative ABC-type amino acid transporter permease   | 0.46          | 0.30160 | 0.92          | 0.01549 | 0.81          | 0.09468 |
| STM1953         | yedO    | D-cysteine desulphydrase                            | 0.33          | 0.50245 | 0.56          | 0.09165 | -0.03         | 0.95407 |
| STM1953         | yedO    | D-cysteine desulphydrase                            | 1.57          | 0.03961 | -0.02         | 0.96131 | 1.31          | 0.03680 |
| STM1954         | fliY    | putative periplasmic binding transport protein      | -0.94         | 0.08929 | 1.52          | 0.29593 | -0.05         | 0.93013 |
| STM1954         | fliY    | putative periplasmic binding transport protein      | -0.46         | 0.52776 | 0.00          | 0.99871 | 0.74          | 0.14946 |
| STM1955         | fliZ    | putative FliA-regulator                             | -1.23         | 0.13486 | -1.22         | 0.03049 | -0.76         | 0.36878 |
| STM1955         | fliZ    | putative FliA-regulator                             | 0.44          | 0.30631 | -2.39         | 0.00020 | -1.34         | 0.03545 |
| STM1956         | fliA    | flagellar biosynthesis sigma factor FliA            | -2.64         | 0.03029 | -2.82         | 0.00011 | -4.22         | 0.00004 |
| STM1956         | fliA    | flagellar biosynthesis sigma factor FliA            | -1.83         | 0.02655 | -3.21         | 0.00005 | -3.91         | 0.00011 |
| STM1958         | fliB    | lysine-N-methylase                                  | -2.57         | 0.00661 | -2.53         | 0.00015 | -2.59         | 0.00691 |
| STM1958         | fliB    | lysine-N-methylase                                  | -2.52         | 0.02729 | -2.68         | 0.00034 | -2.65         | 0.02959 |
| STM1959         | fliC    | flagellar biosynthesis protein                      | -4.90         | 0.00512 | -4.95         | 0.00000 | -5.78         | 0.00001 |
| STM1959         | fliC    | flagellar biosynthesis protein                      | -3.82         | 0.00541 | -4.95         | 0.00002 | -5.44         | 0.00002 |
| STM1960         | fliD    | flagellar hook-associated protein                   | -1.25         | 0.53960 | -3.82         | 0.00012 | -3.44         | 0.00021 |
| STM1960         | fliD    | flagellar hook-associated protein                   | 0.78          | 0.46604 | -4.48         | 0.00001 | -5.31         | 0.00003 |
| STM1961         | fliS    | flagellar protein FliS                              | -2.74         | 0.00673 | -3.06         | 0.00005 | -3.59         | 0.00257 |
| STM1961         | fliS    | flagellar protein FliS                              | -3.64         | 0.01615 | -3.06         | 0.00007 | -4.30         | 0.00018 |
| STM1962         | fliT    | possible FliD export chaperone                      | -2.66         | 0.01808 | -3.21         | 0.00002 | -4.19         | 0.00004 |
| STM1962         | fliT    | possible FliD export chaperone                      | -2.57         | 0.03538 | -3.38         | 0.00003 | -2.44         | 0.01808 |
| STM1963         | amyA    | cytoplasmic alpha-amylase                           | -0.95         | 0.07738 | -0.62         | 0.07315 | -1.50         | 0.00773 |
| STM1963         | amyA    | cytoplasmic alpha-amylase                           | 0.67          | 0.17278 | -0.48         | 0.14895 | -0.31         | 0.45592 |
| STM1964         | yedD    | putative outer membrane lipoprotein                 | -0.35         | 0.59076 | 0.06          | 0.89765 | -1.55         | 0.01557 |
| STM1964         | yedD    | putative outer membrane lipoprotein                 | 1.04          | 0.08929 | -0.64         | 0.14162 | -0.18         | 0.67204 |
| STM1965         | yedE    | hypothetical protein STM1965                        | -2.05         | 0.01028 | -1.17         | 0.02840 | -1.43         | 0.03369 |
| STM1965         | yedE    | hypothetical protein STM1965                        | -1.35         | 0.02896 | -1.80         | 0.00043 | -1.01         | 0.03130 |
| STM1966         | yedF    | putative transcriptional regulator                  | -0.89         | 0.10029 | -1.19         | 0.00838 | -1.85         | 0.01010 |
| STM1966         | yedF    | putative transcriptional regulator                  | 0.53          | 0.55509 | -0.94         | 0.01679 | -1.31         | 0.01758 |

**Table S2.** Genome-wide expression of *Salmonella enterica* serovar Typhimurium inside fibroblasts

|                 |           |                                                         | Intracellular WT<br>24 h p.i.                                                      |         | Intracellular <i>phoP</i><br>24 h p.i.                                              |         | Extracellular WT<br>stationary phase                                                |         |
|-----------------|-----------|---------------------------------------------------------|------------------------------------------------------------------------------------|---------|-------------------------------------------------------------------------------------|---------|-------------------------------------------------------------------------------------|---------|
|                 |           |                                                         | Relative to WT<br>exponential LB                                                   |         | Relative to <i>phoP</i><br>exponential LB                                           |         | Relative to WT<br>exponential LB                                                    |         |
|                 |           |                                                         |  |         |  |         |  |         |
| Systematic name | Gene      | Product                                                 | log2Ratio (M)                                                                      | p value | log2Ratio (M)                                                                       | p value | log2Ratio (M)                                                                       | p value |
| STM1968         | fliE      | flagellar basal body protein                            | -0.79                                                                              | 0.13730 | -2.16                                                                               | 0.00735 | -2.20                                                                               | 0.01114 |
| STM1968         | fliE      | flagellar basal body protein                            | -0.65                                                                              | 0.19351 | -2.59                                                                               | 0.00009 | -1.96                                                                               | 0.00098 |
| STM1969         | fliF      | flagellar M-ring protein                                | -3.40                                                                              | 0.00623 | -4.07                                                                               | 0.00006 | -4.11                                                                               | 0.00012 |
| STM1969         | fliF      | flagellar M-ring protein                                | -2.24                                                                              | 0.00930 | -4.73                                                                               | 0.00000 | -4.31                                                                               | 0.00007 |
| STM1970         | fliG      | flagellar motor protein                                 | -3.03                                                                              | 0.01085 | -4.05                                                                               | 0.00011 | -3.52                                                                               | 0.00014 |
| STM1970         | fliG      | flagellar motor protein                                 | -3.89                                                                              | 0.00512 | -4.79                                                                               | 0.00005 | -4.56                                                                               | 0.00006 |
| STM1971         | fliH      | flagellar assembly protein                              | -4.84                                                                              | 0.00547 | -4.41                                                                               | 0.00001 | -5.34                                                                               | 0.00006 |
| STM1971         | fliH      | flagellar assembly protein                              | -3.13                                                                              | 0.00757 | -5.40                                                                               | 0.00001 | -4.45                                                                               | 0.00234 |
| STM1972         | fliI      | flagellum-specific ATP synthase                         | -2.85                                                                              | 0.00547 | -2.37                                                                               | 0.00011 | -2.20                                                                               | 0.00976 |
| STM1972         | fliI      | flagellum-specific ATP synthase                         | -1.37                                                                              | 0.10932 | -3.61                                                                               | 0.00004 | -2.37                                                                               | 0.00046 |
| STM1973         | fliJ      | flagellar protein                                       | -1.76                                                                              | 0.01975 | -2.67                                                                               | 0.00014 | -0.80                                                                               | 0.35689 |
| STM1973         | fliJ      | flagellar protein                                       | 0.03                                                                               | 0.96004 | -2.65                                                                               | 0.00047 | -0.20                                                                               | 0.80480 |
| STM1974         | fliK      | flagellar hook-length control protein                   | -2.84                                                                              | 0.00547 | -2.88                                                                               | 0.00325 | -2.40                                                                               | 0.00057 |
| STM1974         | fliK      | flagellar hook-length control protein                   | -2.33                                                                              | 0.00819 | -3.13                                                                               | 0.00017 | -3.07                                                                               | 0.00052 |
| STM1975         | fliL      | flagellar biosynthesis protein                          | -2.53                                                                              | 0.00643 | -2.99                                                                               | 0.00021 | -2.90                                                                               | 0.00012 |
| STM1975         | fliL      | flagellar biosynthesis protein                          | -2.31                                                                              | 0.01418 | -3.63                                                                               | 0.00003 | -2.39                                                                               | 0.00053 |
| STM1976         | fliM      | flagellar motor switch protein                          | -3.97                                                                              | 0.00512 | -2.62                                                                               | 0.00012 | -2.79                                                                               | 0.00034 |
| STM1976         | fliM      | flagellar motor switch protein                          | -2.85                                                                              | 0.00955 | -3.20                                                                               | 0.00004 | -4.28                                                                               | 0.00012 |
| STM1977         | fliN      | flagellar motor switch protein                          | -2.77                                                                              | 0.01420 | -3.70                                                                               | 0.00372 | -2.70                                                                               | 0.00012 |
| STM1977         | fliN      | flagellar motor switch protein                          | -3.07                                                                              | 0.00803 | -3.40                                                                               | 0.00005 | -3.70                                                                               | 0.00008 |
| STM1978         | fliO      | flagellar biosynthetic protein                          | -3.02                                                                              | 0.00627 | -2.74                                                                               | 0.00020 | -2.83                                                                               | 0.00078 |
| STM1978         | fliO      | flagellar biosynthetic protein                          | -2.02                                                                              | 0.01392 | -3.50                                                                               | 0.00005 | -3.18                                                                               | 0.00022 |
| STM1979         | fliP      | flagellar biosynthesis protein                          | -0.32                                                                              | 0.55245 | -1.51                                                                               | 0.00101 | -1.41                                                                               | 0.08574 |
| STM1979         | fliP      | flagellar biosynthesis protein                          | 0.30                                                                               | 0.73607 | -1.79                                                                               | 0.00111 | -0.90                                                                               | 0.13107 |
| STM1980         | fliQ      | flagellar biosynthesis protein                          | -1.34                                                                              | 0.02584 | -1.85                                                                               | 0.00412 | -1.46                                                                               | 0.00500 |
| STM1980         | fliQ      | flagellar biosynthesis protein                          | -1.64                                                                              | 0.01466 | -1.98                                                                               | 0.00139 | -2.98                                                                               | 0.03959 |
| STM1981         | fliR      | flagellar biosynthesis protein                          | -1.53                                                                              | 0.02172 | -0.76                                                                               | 0.50503 | -1.23                                                                               | 0.00930 |
| STM1981         | fliR      | flagellar biosynthesis protein                          | -0.78                                                                              | 0.18114 | -1.18                                                                               | 0.00448 | -0.96                                                                               | 0.10506 |
| STM1982         | rcaA      | colanic acid capsular biosynthesis activation protein A | 0.27                                                                               | 0.51266 | -0.68                                                                               | 0.05500 | 0.77                                                                                | 0.19154 |
| STM1982         | rcaA      | colanic acid capsular biosynthesis activation protein A | 0.53                                                                               | 0.43958 | 0.04                                                                                | 0.94075 | 0.80                                                                                | 0.20262 |
| STM1983         | dsrB      | hypothetical protein STM1983                            | -0.52                                                                              | 0.37624 | 0.19                                                                                | 0.61509 | 1.33                                                                                | 0.01567 |
| STM1983         | dsrB      | hypothetical protein STM1983                            | -0.08                                                                              | 0.88368 | -0.22                                                                               | 0.57598 | 1.41                                                                                | 0.00732 |
| STM1984         | yodD      | putative cytoplasmic protein                            | -0.96                                                                              | 0.25101 | -0.24                                                                               | 0.47380 | 3.72                                                                                | 0.00018 |
| STM1984         | yodD      | putative cytoplasmic protein                            | -0.33                                                                              | 0.78325 | 0.43                                                                                | 0.25930 | 3.96                                                                                | 0.00064 |
| STM1986         | yedP      | hypothetical protein STM1986                            | -0.12                                                                              | 0.82471 | 0.29                                                                                | 0.49860 | 0.28                                                                                | 0.54826 |
| STM1986         | yedP      | hypothetical protein STM1986                            | 1.57                                                                               | 0.04632 | 0.72                                                                                | 0.09752 | 2.38                                                                                | 0.00195 |
| STM1987         | STM1987   | putative inner membrane protein                         | 0.33                                                                               | 0.61141 | 0.25                                                                                | 0.47812 | 1.18                                                                                | 0.05517 |
| STM1987         | STM1987   | putative inner membrane protein                         | -0.06                                                                              | 0.92304 | 0.49                                                                                | 0.11199 | 1.39                                                                                | 0.04990 |
| STM1988,S       | STM1988,S | putative cytoplasmic protein                            | 0.99                                                                               | 0.08311 | 0.08                                                                                | 0.88335 | 2.85                                                                                | 0.00022 |
| STM1988,S       | STM1988,S | putative cytoplasmic protein                            | 1.53                                                                               | 0.09758 | -0.48                                                                               | 0.64502 | 3.47                                                                                | 0.00014 |
| STM1989         | yedI      | putative inner membrane protein                         | -0.36                                                                              | 0.49561 | 0.42                                                                                | 0.22710 | 0.32                                                                                | 0.49610 |
| STM1989         | yedI      | putative inner membrane protein                         | -1.47                                                                              | 0.06452 | -0.61                                                                               | 0.06710 | -0.02                                                                               | 0.97030 |
| STM1990         | yedA      | putative permease                                       | -1.21                                                                              | 0.06088 | -0.02                                                                               | 0.95244 | -0.93                                                                               | 0.08999 |
| STM1990         | yedA      | putative permease                                       | -0.21                                                                              | 0.72668 | -0.71                                                                               | 0.02954 | 0.01                                                                                | 0.99365 |
| STM1991         | vsr       | DNA mismatch endonuclease                               | -0.03                                                                              | 0.96201 | -0.21                                                                               | 0.57979 | -0.97                                                                               | 0.04971 |
| STM1991         | vsr       | DNA mismatch endonuclease                               | 1.26                                                                               | 0.10585 | -0.34                                                                               | 0.27843 | 0.12                                                                                | 0.80133 |
| STM1992         | dcm       | DNA cytosine methylase                                  | 0.07                                                                               | 0.91561 | 0.64                                                                                | 0.07789 | -0.13                                                                               | 0.77584 |
| STM1992         | dcm       | DNA cytosine methylase                                  | 0.77                                                                               | 0.46368 | -0.60                                                                               | 0.06460 | 0.98                                                                                | 0.04488 |
| STM1993         | yedJ      | putative hydrolase                                      | 0.12                                                                               | 0.86827 | -0.54                                                                               | 0.15812 | -1.62                                                                               | 0.00817 |
| STM1993         | yedJ      | putative hydrolase                                      | 0.03                                                                               | 0.96503 | 0.01                                                                                | 0.97326 | -0.04                                                                               | 0.94189 |
| STM1994         | STM1994   | putative inner membrane protein                         | -0.48                                                                              | 0.29599 | 0.18                                                                                | 0.59651 | -1.05                                                                               | 0.03649 |
| STM1994         | STM1994   | putative inner membrane protein                         | 1.65                                                                               | 0.04067 | 0.59                                                                                | 0.20981 | 0.83                                                                                | 0.11879 |
| STM1995         | ompS      | putative porin                                          | -1.04                                                                              | 0.33309 | -1.70                                                                               | 0.00348 | -0.86                                                                               | 0.31440 |
| STM1995         | ompS      | putative porin                                          | -0.36                                                                              | 0.46188 | -0.79                                                                               | 0.03205 | -0.73                                                                               | 0.49256 |
| STM1996         | cspB      | putative cold-shock protein                             | -0.41                                                                              | 0.58917 | -0.70                                                                               | 0.06498 | -0.35                                                                               | 0.43177 |
| STM1996         | cspB      | putative cold-shock protein                             | -0.48                                                                              | 0.73377 | -1.51                                                                               | 0.08962 | -0.33                                                                               | 0.44707 |
| STM1997         | umuC      | DNA polymerase IV                                       | -0.54                                                                              | 0.26298 | 1.98                                                                                | 0.00067 | 0.53                                                                                | 0.33530 |
| STM1997         | umuC      | DNA polymerase IV                                       | 0.69                                                                               | 0.49838 | 0.95                                                                                | 0.03033 | -0.17                                                                               | 0.81749 |
| STM1997         | umuC      | DNA polymerase IV                                       | 0.38                                                                               | 0.61086 | 1.58                                                                                | 0.00214 | -0.20                                                                               | 0.72506 |
| STM1997         | umuC      | DNA polymerase IV                                       | 1.33                                                                               | 0.12158 | 0.87                                                                                | 0.03681 | 0.19                                                                                | 0.73031 |
| STM1998         | umuD      | SOS-response transcriptional repressors                 | -0.32                                                                              | 0.43811 | 0.18                                                                                | 0.54118 | 0.06                                                                                | 0.91533 |
| STM1998         | umuD      | SOS-response transcriptional repressors                 | 1.54                                                                               | 0.02776 | 0.53                                                                                | 0.12121 | 0.36                                                                                | 0.48339 |
| STM1999         | STM1999   | putative cytoplasmic protein                            | 0.47                                                                               | 0.56946 | 1.69                                                                                | 0.00121 | 0.30                                                                                | 0.71528 |
| STM1999         | STM1999   | putative cytoplasmic protein                            | 2.70                                                                               | 0.01392 | 1.81                                                                                | 0.00093 | 1.35                                                                                | 0.00882 |
| STM2000         | serU      | STM2000                                                 | -1.84                                                                              | 0.01267 | -0.17                                                                               | 0.69598 | 0.49                                                                                | 0.23040 |
| STM2000         | serU      | STM2000                                                 | -0.49                                                                              | 0.40521 | 0.12                                                                                | 0.76912 | 1.17                                                                                | 0.02753 |
| STM2001         | yeel      | putative inner membrane protein                         | 0.11                                                                               | 0.80250 | -0.30                                                                               | 0.30158 | 0.14                                                                                | 0.73511 |
| STM2001         | yeel      | putative inner membrane protein                         | 0.93                                                                               | 0.06092 | 0.15                                                                                | 0.66614 | -0.04                                                                               | 0.95431 |
| STM2002         | asnT      | STM2002                                                 | 0.77                                                                               | 0.54711 | 1.22                                                                                | 0.00356 | 3.67                                                                                | 0.00007 |
| STM2002         | asnT      | STM2002                                                 | 1.37                                                                               | 0.33225 | 0.84                                                                                | 0.28533 | 4.48                                                                                | 0.00008 |



**Table S2.** Genome-wide expression of *Salmonella enterica* serovar Typhimurium inside fibroblasts

Intracellular WT 24 h p.i.      Intracellular *phoP* 24 h p.i.      Extracellular WT stationary phase

Relative to WT exponential LB      Relative to *phoP* exponential LB      Relative to WT exponential LB



| Systematic name | Gene | Product                                             | log2Ratio (M) | p value | log2Ratio (M) | p value | log2Ratio (M) | p value |
|-----------------|------|-----------------------------------------------------|---------------|---------|---------------|---------|---------------|---------|
| STM2041         | pduD | propanediol dehydratase medium subunit              | 0.85          | 0.69269 | -0.87         | 0.06776 | 0.76          | 0.26259 |
| STM2041         | pduD | propanediol dehydratase medium subunit              | 1.62          | 0.45345 | -2.33         | 0.00780 | -0.80         | 0.19750 |
| STM2042         | pduE | propanediol dehydratase small subunit               | -0.56         | 0.25990 | -1.43         | 0.06372 | 0.00          | 0.99518 |
| STM2042         | pduE | propanediol dehydratase small subunit               | 0.27          | 0.70405 | -1.58         | 0.00098 | -0.07         | 0.90111 |
| STM2043         | pduG | propanediol dehydratase reactivation protein        | -0.15         | 0.83489 | -0.79         | 0.05881 | 0.05          | 0.94846 |
| STM2043         | pduG | propanediol dehydratase reactivation protein        | 1.04          | 0.08410 | -0.80         | 0.19493 | 1.73          | 0.01663 |
| STM2044         | pduH | propanediol dehydratase reactivation protein        | -0.28         | 0.57930 | -0.16         | 0.63458 | 0.12          | 0.73802 |
| STM2044         | pduH | propanediol dehydratase reactivation protein        | 1.13          | 0.11528 | -0.44         | 0.36955 | 0.98          | 0.02603 |
| STM2045         | pduJ | polyhedral body protein                             | 0.05          | 0.90377 | -0.07         | 0.93612 | -0.79         | 0.10985 |
| STM2045         | pduJ | polyhedral body protein                             | 2.36          | 0.06636 | -0.08         | 0.85772 | 0.49          | 0.55912 |
| STM2046         | pduK | polyhedral body protein                             | -0.45         | 0.33191 | -0.43         | 0.42395 | -0.81         | 0.11856 |
| STM2046         | pduK | polyhedral body protein                             | 0.66          | 0.45612 | -0.91         | 0.03554 | 0.29          | 0.72150 |
| STM2047         | pduL | propanediol utilization protein                     | 0.37          | 0.35949 | -0.54         | 0.08853 | -0.19         | 0.79610 |
| STM2047         | pduL | propanediol utilization protein                     | 0.85          | 0.14190 | -1.04         | 0.02848 | 1.22          | 0.11745 |
| STM2048         | pduM | propanediol utilization protein                     | -0.61         | 0.17542 | 0.63          | 0.62438 | -0.61         | 0.34691 |
| STM2048         | pduM | propanediol utilization protein                     | -0.29         | 0.59371 | -1.11         | 0.01031 | -0.61         | 0.61017 |
| STM2049         | pduN | polyhedral body protein                             | 0.50          | 0.54377 | -0.70         | 0.13248 | -0.25         | 0.59945 |
| STM2049         | pduN | polyhedral body protein                             | -0.57         | 0.21536 | -0.72         | 0.19459 | -0.82         | 0.10781 |
| STM2050         | pduO | propanediol utilization protein                     | -0.22         | 0.59927 | 0.42          | 0.29820 | 0.13          | 0.77763 |
| STM2050         | pduO | propanediol utilization protein                     | 1.54          | 0.24107 | -1.33         | 0.03986 | 0.41          | 0.40800 |
| STM2051         | pduP | CoA-dependent propionaldehyde dehydrogenase         | -0.71         | 0.22006 | -0.59         | 0.19320 | -1.24         | 0.01698 |
| STM2051         | pduP | CoA-dependent propionaldehyde dehydrogenase         | 1.97          | 0.13716 | -1.10         | 0.02644 | -0.68         | 0.31379 |
| STM2052         | pduQ | propanol dehydrogenase                              | 1.07          | 0.09751 | -1.42         | 0.00591 | 0.02          | 0.97553 |
| STM2052         | pduQ | propanol dehydrogenase                              | 0.93          | 0.16786 | -1.16         | 0.02249 | 0.87          | 0.18597 |
| STM2053         | pduS | polyhedral body protein                             | -0.46         | 0.39776 | -0.69         | 0.06866 | -0.69         | 0.40116 |
| STM2053         | pduS | polyhedral body protein                             | -0.77         | 0.13062 | -1.10         | 0.03508 | -1.37         | 0.20625 |
| STM2054         | pduT | polyhedral body protein                             | 2.14          | 0.01491 | -1.10         | 0.01099 | 0.38          | 0.32226 |
| STM2054         | pduT | polyhedral body protein                             | 2.58          | 0.01652 | -1.26         | 0.02872 | 1.72          | 0.01192 |
| STM2055         | pduU | polyhedral body protein                             | 0.82          | 0.32287 | -1.95         | 0.00385 | -0.11         | 0.83342 |
| STM2055         | pduU | polyhedral body protein                             | 0.95          | 0.27415 | -2.35         | 0.00612 | 0.89          | 0.32940 |
| STM2056         | pduV | propanediol utilization protein                     | -0.79         | 0.08929 | -0.61         | 0.16207 | 0.20          | 0.74333 |
| STM2056         | pduV | propanediol utilization protein                     | -0.09         | 0.86228 | -1.46         | 0.01214 | 0.47          | 0.32479 |
| STM2057         | pduW | acetate/propionate kinase                           | -0.43         | 0.49096 | -0.67         | 0.39735 | -0.95         | 0.07208 |
| STM2057         | pduW | acetate/propionate kinase                           | -0.02         | 0.96450 | 0.46          | 0.32465 | -0.03         | 0.95469 |
| STM2058         | pduX | propanediol utilization protein                     | -1.67         | 0.03038 | 0.11          | 0.80605 | -1.89         | 0.00939 |
| STM2058         | pduX | propanediol utilization protein                     | 0.76          | 0.43560 | -0.23         | 0.54244 | -0.91         | 0.08999 |
| STM2059         | yeeX | hypothetical protein STM2059                        | -1.66         | 0.10867 | -0.33         | 0.45891 | -1.23         | 0.01144 |
| STM2059         | yeeX | hypothetical protein STM2059                        | -1.76         | 0.05543 | 0.12          | 0.70889 | -1.25         | 0.01833 |
| STM2060         | yeeA | putative inner membrane protein                     | -0.41         | 0.36207 | 0.97          | 0.00717 | 0.03          | 0.95195 |
| STM2060         | yeeA | putative inner membrane protein                     | 0.08          | 0.84977 | 0.60          | 0.11864 | 0.13          | 0.74708 |
| STM2061         | sbmC | DNA gyrase inhibitor                                | 0.49          | 0.59477 | 1.76          | 0.00130 | 2.91          | 0.00009 |
| STM2061         | sbmC | DNA gyrase inhibitor                                | 1.10          | 0.06456 | 1.47          | 0.00471 | 3.67          | 0.00005 |
| STM2062         | dacD | DD-carboxypeptidase                                 | -1.14         | 0.09991 | 0.02          | 0.95330 | -0.17         | 0.73391 |
| STM2062         | dacD | DD-carboxypeptidase                                 | 0.06          | 0.90910 | -0.64         | 0.08151 | -0.04         | 0.94836 |
| STM2063         | phsC | thiosulfate reductase cytochrome B subunit          | 0.15          | 0.79511 | -0.45         | 0.28607 | -0.61         | 0.11071 |
| STM2063         | phsC | thiosulfate reductase cytochrome B subunit          | 0.42          | 0.40446 | -0.69         | 0.07180 | 0.48          | 0.52339 |
| STM2064         | phsB | thiosulfate reductase electron transport protein    | -0.08         | 0.87808 | 0.30          | 0.31347 | 0.20          | 0.68157 |
| STM2064         | phsB | thiosulfate reductase electron transport protein    | -0.18         | 0.68598 | -0.43         | 0.35898 | 0.27          | 0.50290 |
| STM2065         | phsA | thiosulfate reductase precursor                     | 0.26          | 0.69493 | 0.52          | 0.22785 | -0.79         | 0.08184 |
| STM2065         | phsA | thiosulfate reductase precursor                     | 1.63          | 0.02423 | -0.77         | 0.07599 | 0.67          | 0.12104 |
| STM2066         | sopA | secreted effector protein                           | -0.84         | 0.12856 | -0.76         | 0.03245 | -1.13         | 0.06556 |
| STM2066         | sopA | secreted effector protein                           | 2.15          | 0.21798 | -0.49         | 0.25358 | -0.08         | 0.90141 |
| STM2067         | sbcB | exonuclease I                                       | 0.00          | 0.99465 | -1.01         | 0.00699 | 0.26          | 0.73618 |
| STM2067         | sbcB | exonuclease I                                       | 0.22          | 0.84620 | -0.91         | 0.02793 | 0.85          | 0.04607 |
| STM2068         | yeeF | putative amino acid transport protein               | -2.76         | 0.00839 | -1.56         | 0.00083 | -2.93         | 0.00042 |
| STM2068         | yeeF | putative amino acid transport protein               | -1.36         | 0.02364 | -2.09         | 0.00037 | -2.10         | 0.00072 |
| STM2069         | yeeY | putative transcriptional regulator                  | -1.00         | 0.08959 | -0.54         | 0.10542 | 1.35          | 0.16811 |
| STM2069         | yeeY | putative transcriptional regulator                  | -0.99         | 0.07354 | -1.94         | 0.00036 | 0.64          | 0.46536 |
| STM2070         | yeeZ | putative dehydratase                                | -1.38         | 0.02181 | 1.24          | 0.01298 | 2.26          | 0.00046 |
| STM2070         | yeeZ | putative dehydratase                                | -0.37         | 0.53951 | 1.39          | 0.00197 | 2.72          | 0.00026 |
| STM2071         | hisG | ATP phosphoribosyltransferase                       | -1.23         | 0.04100 | 1.57          | 0.00226 | -1.68         | 0.01608 |
| STM2071         | hisG | ATP phosphoribosyltransferase                       | -0.31         | 0.48950 | 1.54          | 0.00175 | -1.59         | 0.00386 |
| STM2072         | hisD | histidinol dehydrogenase                            | -0.84         | 0.08333 | 1.77          | 0.00158 | -2.70         | 0.00265 |
| STM2072         | hisD | histidinol dehydrogenase                            | 0.22          | 0.76436 | 1.67          | 0.00220 | -1.04         | 0.14339 |
| STM2073         | hisC | histidinol-phosphate aminotransferase               | -1.36         | 0.05655 | 0.37          | 0.23796 | -1.01         | 0.13751 |
| STM2073         | hisC | histidinol-phosphate aminotransferase               | -0.55         | 0.46005 | 0.70          | 0.06137 | -1.24         | 0.01145 |
| STM2074         | hisB | imidazole glycerol-phosphate dehydratase/histidinol | -1.62         | 0.01572 | 0.68          | 0.05181 | -1.61         | 0.00194 |
| STM2074         | hisB | imidazole glycerol-phosphate dehydratase/histidinol | -1.25         | 0.03457 | 0.74          | 0.05963 | -2.72         | 0.00845 |
| STM2075         | hisH | imidazole glycerol phosphate synthase subunit HisH  | 0.80          | 0.11955 | 1.26          | 0.00849 | -2.17         | 0.00097 |
| STM2075         | hisH | imidazole glycerol phosphate synthase subunit HisH  | 0.90          | 0.07710 | 1.15          | 0.00629 | -0.88         | 0.07039 |

**Table S2.** Genome-wide expression of *Salmonella enterica* serovar Typhimurium inside fibroblasts

Intracellular WT 24 h p.i.      Intracellular *phoP* 24 h p.i.      Extracellular WT stationary phase

Relative to WT exponential LB      Relative to *phoP* exponential LB      Relative to WT exponential LB



| Systematic name | Gene | Product                                                   | log2Ratio (M) | p value | log2Ratio (M) | p value | log2Ratio (M) | p value |
|-----------------|------|-----------------------------------------------------------|---------------|---------|---------------|---------|---------------|---------|
| STM2076         | hisA | 1-(5-phosphoribosyl)-5-                                   | -2.18         | 0.01834 | 0.31          | 0.35289 | -1.72         | 0.01479 |
| STM2076         | hisA | 1-(5-phosphoribosyl)-5-                                   | -1.93         | 0.00950 | 0.39          | 0.23994 | -2.73         | 0.03631 |
| STM2077         | hisF | imidazole glycerol phosphate synthase subunit HisF        | -1.99         | 0.04201 | 0.08          | 0.82442 | -1.03         | 0.06148 |
| STM2077         | hisF | imidazole glycerol phosphate synthase subunit HisF        | -1.15         | 0.05557 | 1.15          | 0.00430 | -1.07         | 0.03394 |
| STM2078         | hisI | bifunctional phosphoribosyl-AMP                           | -0.11         | 0.81793 | 0.00          | 0.98906 | -1.00         | 0.02623 |
| STM2078         | hisI | bifunctional phosphoribosyl-AMP                           | 0.26          | 0.64095 | -0.07         | 0.85765 | -0.70         | 0.19325 |
| STM2079         | wzzB | lipopolysaccharide O-antigen chain length regulator       | -0.82         | 0.07968 | 0.59          | 0.08860 | 0.47          | 0.31812 |
| STM2079         | wzzB | lipopolysaccharide O-antigen chain length regulator       | -0.24         | 0.55715 | 0.41          | 0.27131 | 0.93          | 0.02540 |
| STM2080         | udg  | UDP-glucose/GDP-mannose dehydrogenase                     | -0.17         | 0.68969 | 1.11          | 0.16941 | -0.47         | 0.45768 |
| STM2080         | udg  | UDP-glucose/GDP-mannose dehydrogenase                     | -0.18         | 0.89257 | 0.06          | 0.88515 | -3.03         | 0.00336 |
| STM2081         | gnd  | 6-phosphogluconate dehydrogenase                          | -1.83         | 0.01114 | -0.81         | 0.01371 | -0.49         | 0.27913 |
| STM2081         | gnd  | 6-phosphogluconate dehydrogenase                          | 0.12          | 0.91058 | -0.41         | 0.29246 | -0.83         | 0.19132 |
| STM2082         | rfbP | undecaprenol-phosphate galactosephosphotransferase/O-     | -2.95         | 0.00582 | -1.42         | 0.00683 | -3.10         | 0.00062 |
| STM2082         | rfbP | undecaprenol-phosphate galactosephosphotransferase/O-     | -3.06         | 0.00613 | -1.21         | 0.02512 | -2.29         | 0.00043 |
| STM2083         | rfbK | phosphomannomutase                                        | -1.61         | 0.01752 | -1.49         | 0.00955 | -1.82         | 0.01655 |
| STM2083         | rfbK | phosphomannomutase                                        | -1.06         | 0.12640 | -1.32         | 0.00737 | -1.68         | 0.01863 |
| STM2084         | rfbM | mannose-1-phosphate guanylyltransferase                   | 0.40          | 0.54840 | -0.92         | 0.02713 | -1.67         | 0.00611 |
| STM2084         | rfbM | mannose-1-phosphate guanylyltransferase                   | 1.25          | 0.11003 | -0.80         | 0.11800 | -0.75         | 0.10258 |
| STM2085         | rfbN | rhamnosyl transferase                                     | -2.53         | 0.00775 | -2.33         | 0.00011 | -1.67         | 0.01191 |
| STM2085         | rfbN | rhamnosyl transferase                                     | -3.93         | 0.00593 | -2.26         | 0.00026 | -2.87         | 0.00086 |
| STM2086         | rfbU | mannosyl transferase                                      | -1.82         | 0.02162 | -1.37         | 0.00364 | -1.76         | 0.00371 |
| STM2086         | rfbU | mannosyl transferase                                      | -2.60         | 0.00637 | -1.85         | 0.00052 | -2.03         | 0.00113 |
| STM2087         | rfbV | abequosyltransferase                                      | -4.02         | 0.00537 | -2.05         | 0.00052 | -3.09         | 0.00024 |
| STM2087         | rfbV | abequosyltransferase                                      | -2.75         | 0.00757 | -2.14         | 0.00081 | -5.12         | 0.00002 |
| STM2088         | rfbX | putative O-antigen transferase                            | -0.72         | 0.40315 | -1.87         | 0.00303 | -1.69         | 0.00395 |
| STM2088         | rfbX | putative O-antigen transferase                            | -0.89         | 0.59119 | -2.23         | 0.00027 | -0.84         | 0.04572 |
| STM2089         | rfbJ | CDP-abequose synthase                                     | -1.63         | 0.19791 | -0.54         | 0.08212 | -3.96         | 0.00008 |
| STM2089         | rfbJ | CDP-abequose synthase                                     | -2.89         | 0.00547 | -0.42         | 0.15065 | -3.99         | 0.00023 |
| STM2090         | rfbH | CDP-6-deoxy-D-xylo-4-hexulose-3-dehydrase                 | -3.00         | 0.01013 | -1.15         | 0.01045 | -2.30         | 0.03063 |
| STM2090         | rfbH | CDP-6-deoxy-D-xylo-4-hexulose-3-dehydrase                 | -2.89         | 0.00927 | -1.35         | 0.00392 | -3.75         | 0.00007 |
| STM2091         | rfbG | CDP glucose 4,6-dehydratase                               | -2.13         | 0.00849 | -1.09         | 0.00430 | -3.53         | 0.00008 |
| STM2091         | rfbG | CDP glucose 4,6-dehydratase                               | -1.48         | 0.03408 | -0.79         | 0.03487 | -3.15         | 0.00058 |
| STM2092         | rfbF | glucose-1-phosphate cytidyltransferase                    | -2.83         | 0.01479 | -0.78         | 0.02150 | -3.02         | 0.00037 |
| STM2092         | rfbF | glucose-1-phosphate cytidyltransferase                    | -1.30         | 0.05125 | -0.58         | 0.08068 | -2.29         | 0.00035 |
| STM2093         | rfbI | CDP-6-deoxy-delta-3,4-glucoseen reductase                 | -2.55         | 0.00841 | -2.06         | 0.00130 | -2.41         | 0.00031 |
| STM2093         | rfbI | CDP-6-deoxy-delta-3,4-glucoseen reductase                 | -1.49         | 0.07767 | -1.93         | 0.00046 | -2.33         | 0.00076 |
| STM2094         | rfbC | dTDP-4,deoxyrhamnose 3,5 epimerase                        | -2.83         | 0.00607 | -1.94         | 0.00024 | -3.47         | 0.00009 |
| STM2094         | rfbC | dTDP-4,deoxyrhamnose 3,5 epimerase                        | -3.04         | 0.00541 | -1.43         | 0.00293 | -3.75         | 0.00018 |
| STM2095         | rfbA | dTDP-glucose pyrophosphorylase                            | -1.91         | 0.01198 | -0.77         | 0.02846 | -1.75         | 0.02159 |
| STM2095         | rfbA | dTDP-glucose pyrophosphorylase                            | -1.50         | 0.05136 | -1.02         | 0.00782 | -2.22         | 0.00232 |
| STM2096         | rfbD | TDP-rhamnose synthetase                                   | -2.59         | 0.01235 | -0.76         | 0.11538 | -3.48         | 0.00026 |
| STM2096         | rfbD | TDP-rhamnose synthetase                                   | -1.35         | 0.03748 | -0.83         | 0.04003 | -2.80         | 0.00095 |
| STM2097         | rfbB | dTDP-glucose 4,6-dehydratase                              | 0.38          | 0.46227 | -0.01         | 0.96891 | 1.51          | 0.00284 |
| STM2097         | rfbB | dTDP-glucose 4,6-dehydratase                              | 0.84          | 0.08259 | -0.16         | 0.63279 | 2.02          | 0.00134 |
| STM2098         | galF | putative glucose-1-phosphate uridylyltransferase subunit  | -1.77         | 0.01993 | -0.54         | 0.09991 | -0.43         | 0.21919 |
| STM2098         | galF | putative glucose-1-phosphate uridylyltransferase subunit  | -0.32         | 0.63744 | -0.55         | 0.07366 | 0.46          | 0.27669 |
| STM2099         | wcaM | putative colanic acid biosynthetic protein                | -0.92         | 0.13284 | -1.30         | 0.01313 | 0.34          | 0.63431 |
| STM2099         | wcaM | putative colanic acid biosynthetic protein                | 0.12          | 0.80011 | -1.67         | 0.00682 | 0.39          | 0.44994 |
| STM2100         | wcaL | putative glycosyl transferase                             | 0.60          | 0.56160 | 0.49          | 0.15290 | 1.89          | 0.00332 |
| STM2100         | wcaL | putative glycosyl transferase                             | 0.63          | 0.36178 | -0.28         | 0.33945 | 1.75          | 0.00198 |
| STM2101         | wcaK | putative galactokinase                                    | 1.16          | 0.05496 | -0.98         | 0.02326 | -0.23         | 0.69832 |
| STM2101         | wcaK | putative galactokinase                                    | 1.76          | 0.02645 | -0.56         | 0.16993 | 1.58          | 0.00174 |
| STM2102         | wzxC | putative export                                           | 0.05          | 0.92457 | -1.24         | 0.03855 | 0.47          | 0.39181 |
| STM2102         | wzxC | putative export                                           | 0.58          | 0.35952 | -0.34         | 0.30297 | 0.89          | 0.06536 |
| STM2103         | wcaJ | UDP-glucose lipid carrier transferase/glucose-1-phosphate | 0.13          | 0.83489 | 0.47          | 0.30026 | 1.72          | 0.00745 |
| STM2103         | wcaJ | UDP-glucose lipid carrier transferase/glucose-1-phosphate | 1.14          | 0.15590 | 0.58          | 0.20062 | 1.99          | 0.00336 |
| STM2104         | cpsG | phosphomannomutase                                        | 2.17          | 0.02101 | 0.03          | 0.95492 | 0.34          | 0.58727 |
| STM2104         | cpsG | phosphomannomutase                                        | 1.87          | 0.05468 | -0.65         | 0.08131 | 0.44          | 0.65192 |
| STM2105,S       | manC | mannose-1-phosphate guanylyltransferase                   | 1.07          | 0.30326 | -0.95         | 0.01825 | -0.21         | 0.66375 |
| STM2105,S       | manC | mannose-1-phosphate guanylyltransferase                   | 1.46          | 0.07059 | -0.86         | 0.21909 | 1.07          | 0.03749 |
| STM2106         | wcaI | putative glycosyl transferase                             | -0.10         | 0.83853 | 0.51          | 0.14483 | 0.78          | 0.10018 |
| STM2106         | wcaI | putative glycosyl transferase                             | 0.50          | 0.34308 | -0.30         | 0.53832 | 0.51          | 0.49698 |
| STM2107         | wcaH | GDP-mannose mannosyl hydrolase                            | -0.37         | 0.57239 | -0.46         | 0.48906 | -0.50         | 0.44942 |
| STM2107         | wcaH | GDP-mannose mannosyl hydrolase                            | 0.70          | 0.46968 | -1.38         | 0.00499 | -1.84         | 0.00192 |
| STM2108         | wcaG | GDP-fucose synthetase                                     | -0.33         | 0.58484 | 0.33          | 0.26256 | 0.34          | 0.54335 |
| STM2108         | wcaG | GDP-fucose synthetase                                     | 0.43          | 0.30977 | 1.17          | 0.03279 | 0.29          | 0.50098 |
| STM2109         | gmd  | GDP-D-mannose dehydratase                                 | 0.78          | 0.41794 | 0.74          | 0.06680 | -0.49         | 0.57673 |
| STM2109         | gmd  | GDP-D-mannose dehydratase                                 | 1.69          | 0.11408 | 0.67          | 0.12329 | 0.73          | 0.53380 |
| STM2110         | wcaF | putative acyltransferase                                  | -0.32         | 0.58728 | -0.18         | 0.68415 | -0.80         | 0.21279 |
| STM2110         | wcaF | putative acyltransferase                                  | -0.54         | 0.59128 | 0.48          | 0.12561 | -0.68         | 0.40914 |

**Table S2.** Genome-wide expression of *Salmonella enterica* serovar Typhimurium inside fibroblasts

Intracellular WT 24 h p.i.      Intracellular *phoP* 24 h p.i.      Extracellular WT stationary phase

Relative to WT exponential LB      Relative to *phoP* exponential LB      Relative to WT exponential LB



| Systematic name | Gene       | Product                                               | log2Ratio (M) | p value | log2Ratio (M) | p value | log2Ratio (M) | p value |
|-----------------|------------|-------------------------------------------------------|---------------|---------|---------------|---------|---------------|---------|
| STM2111         | wcaE       | putative transferase                                  | 0.97          | 0.30150 | 0.75          | 0.05018 | -0.15         | 0.79632 |
| STM2111         | wcaE       | putative transferase                                  | 0.89          | 0.11427 | 0.89          | 0.01538 | 1.05          | 0.01404 |
| STM2112         | wcaD       | putative colanic acid polymerase                      | 0.05          | 0.90734 | -0.55         | 0.19529 | -0.57         | 0.39253 |
| STM2112         | wcaD       | putative colanic acid polymerase                      | 0.78          | 0.31928 | -0.82         | 0.04041 | 0.69          | 0.26644 |
| STM2113         | wcaC       | putative glycosyl transferase                         | -0.50         | 0.34416 | -0.12         | 0.77342 | 0.95          | 0.07034 |
| STM2113         | wcaC       | putative glycosyl transferase                         | -0.06         | 0.95493 | -0.86         | 0.07565 | -0.94         | 0.20138 |
| STM2114         | wcaB       | putative acyl transferase                             | 1.69          | 0.01955 | -0.64         | 0.03772 | 0.44          | 0.27933 |
| STM2114         | wcaB       | putative acyl transferase                             | 0.83          | 0.14061 | -1.29         | 0.00513 | -1.17         | 0.08710 |
| STM2115         | wcaA       | putative glycosyl transferase                         | 1.28          | 0.19084 | -2.91         | 0.00016 | -1.73         | 0.04631 |
| STM2115         | wcaA       | putative glycosyl transferase                         | 0.82          | 0.30301 | -4.08         | 0.00069 | -0.28         | 0.72975 |
| STM2116         | wzc        | putative tyrosine protein kinase                      | 0.94          | 0.62974 | 0.40          | 0.38233 | 2.05          | 0.14996 |
| STM2116         | wzc        | putative tyrosine protein kinase                      | 4.41          | 0.01215 | -0.78         | 0.02570 | 3.30          | 0.00620 |
| STM2117         | wzb        | putative phosphotyrosine-protein phosphatase          | -0.27         | 0.64924 | 1.54          | 0.05058 | -0.48         | 0.58638 |
| STM2117         | wzb        | putative phosphotyrosine-protein phosphatase          | 0.59          | 0.27425 | -0.73         | 0.10346 | -0.90         | 0.56077 |
| STM2118         | wza        | putative outer membrane polysaccharide export protein | 0.02          | 0.97884 | 0.23          | 0.53437 | 0.61          | 0.17427 |
| STM2118         | wza        | putative outer membrane polysaccharide export protein | 0.19          | 0.66101 | -0.06         | 0.94639 | 0.44          | 0.52411 |
| STM2119         | yegH       | putative inner membrane protein                       | -0.33         | 0.54243 | 0.96          | 0.00700 | -0.18         | 0.80377 |
| STM2119         | yegH       | putative inner membrane protein                       | 0.70          | 0.26560 | 0.77          | 0.04257 | 0.02          | 0.97769 |
| STM2120         | asmA       | suppressor of OmpF assembly mutants                   | -0.43         | 0.33887 | 0.71          | 0.04371 | -0.64         | 0.12855 |
| STM2120         | asmA       | suppressor of OmpF assembly mutants                   | 0.46          | 0.41040 | 0.64          | 0.08785 | 0.32          | 0.49090 |
| STM2121         | dcd        | deoxycytidine triphosphate deaminase                  | -1.35         | 0.03288 | 0.26          | 0.46715 | -1.92         | 0.00169 |
| STM2121         | dcd        | deoxycytidine triphosphate deaminase                  | -0.50         | 0.43697 | -0.14         | 0.73857 | -1.24         | 0.04086 |
| STM2122         | udk        | uridine kinase                                        | -1.59         | 0.03218 | -1.12         | 0.00516 | -1.56         | 0.01353 |
| STM2122         | udk        | uridine kinase                                        | -2.68         | 0.02540 | -0.84         | 0.02601 | -3.56         | 0.01540 |
| STM2123         | yegE       | putative diguanylate cyclase/phosphodiesterase        | -0.68         | 0.15610 | -0.56         | 0.45714 | -0.10         | 0.80148 |
| STM2123         | yegE       | putative diguanylate cyclase/phosphodiesterase        | 0.83          | 0.09627 | 0.22          | 0.48449 | 0.88          | 0.05528 |
| STM2124         | alkA       | 3-methyl-adenine DNA glycosylase II                   | -0.67         | 0.27727 | -0.49         | 0.32436 | -0.69         | 0.15680 |
| STM2124         | alkA       | 3-methyl-adenine DNA glycosylase II                   | -0.31         | 0.79511 | 0.34          | 0.26927 | 1.73          | 0.07327 |
| STM2125         | yegD       | putative heat shock protein                           | -0.52         | 0.23359 | 0.43          | 0.69583 | -0.92         | 0.20873 |
| STM2125         | yegD       | putative heat shock protein                           | -1.15         | 0.16568 | -1.19         | 0.00726 | -2.15         | 0.17160 |
| STM2126         | STM2126    | putative secretion protein                            | -0.37         | 0.46474 | -0.09         | 0.82048 | 0.88          | 0.10886 |
| STM2126         | STM2126    | putative secretion protein                            | 0.64          | 0.25246 | -0.67         | 0.04376 | 0.98          | 0.06021 |
| STM2127         | yegN       | putative outer membrane receptor                      | 0.37          | 0.74562 | -0.45         | 0.68972 | -0.38         | 0.30636 |
| STM2127         | yegN       | putative outer membrane receptor                      | 0.85          | 0.35598 | -0.54         | 0.09656 | 0.64          | 0.40929 |
| STM2128         | yegO       | outer membrane putative efflux transporter            | -0.53         | 0.28785 | 0.46          | 0.38083 | -1.09         | 0.33210 |
| STM2128         | yegO       | outer membrane putative efflux transporter            | 0.48          | 0.34079 | -0.88         | 0.02715 | -0.16         | 0.77219 |
| STM2129         | yegB       | putative transport protein                            | -0.67         | 0.45246 | 0.71          | 0.08377 | 0.40          | 0.50361 |
| STM2129         | yegB       | putative transport protein                            | 0.60          | 0.16917 | 0.31          | 0.47781 | 0.42          | 0.25525 |
| STM2130         | baeS       | sensor kinase                                         | -1.20         | 0.05959 | -0.58         | 0.31397 | 0.05          | 0.93387 |
| STM2130         | baeS       | sensor kinase                                         | -0.15         | 0.84241 | -0.19         | 0.56804 | -0.68         | 0.16086 |
| STM2131         | baeR       | response regulator                                    | -0.26         | 0.61888 | -0.22         | 0.47462 | -0.69         | 0.11080 |
| STM2131         | baeR       | response regulator                                    | 1.34          | 0.04539 | 0.07          | 0.87931 | 0.16          | 0.77687 |
| STM2133         | STM2133    | putative cytoplasmic protein                          | 0.46          | 0.34101 | 0.17          | 0.59387 | 0.53          | 0.34874 |
| STM2133         | STM2133    | putative cytoplasmic protein                          | 0.81          | 0.19208 | -1.09         | 0.02179 | 0.45          | 0.38014 |
| STM2134         | STM2134    | putative inner membrane protein                       | -0.29         | 0.53846 | -0.29         | 0.79652 | -0.42         | 0.61163 |
| STM2134         | STM2134    | putative inner membrane protein                       | -0.28         | 0.78571 | -0.34         | 0.50278 | -1.14         | 0.25884 |
| STM2135         | STM2135    | putative inner membrane protein                       | -0.79         | 0.22802 | -1.77         | 0.00115 | -1.33         | 0.01410 |
| STM2135         | STM2135    | putative inner membrane protein                       | 0.63          | 0.19917 | -1.15         | 0.02825 | -0.61         | 0.33187 |
| STM2136         | yegQ       | putative protease                                     | -1.39         | 0.05224 | -1.19         | 0.00289 | -2.18         | 0.00049 |
| STM2136         | yegQ       | putative protease                                     | -0.89         | 0.11322 | -1.12         | 0.00502 | -1.41         | 0.00500 |
| STM2137         | STM2137    | putative cytoplasmic protein                          | 2.29          | 0.00900 | 3.62          | 0.00005 | 1.76          | 0.03578 |
| STM2137         | STM2137    | putative cytoplasmic protein                          | 0.61          | 0.62274 | 3.85          | 0.00002 | 1.50          | 0.00812 |
| STM2138         | STM2138    | putative cytoplasmic protein                          | 3.10          | 0.00541 | 5.10          | 0.00003 | 3.01          | 0.00038 |
| STM2138         | STM2138    | putative cytoplasmic protein                          | 2.74          | 0.00595 | 4.83          | 0.00001 | 2.60          | 0.00051 |
| STM2139         | STM2139    | putative inner membrane protein                       | 0.47          | 0.44035 | 5.91          | 0.00001 | 0.53          | 0.51217 |
| STM2139         | STM2139    | putative inner membrane protein                       | 1.60          | 0.03086 | 5.91          | 0.00001 | 0.71          | 0.16107 |
| STM2139,2n      | STM2139,2n | hypothetical protein STM2139,2n                       | 2.07          | 0.02240 | 1.13          | 0.01607 | 1.79          | 0.01111 |
| STM2139,2n      | STM2139,2n | hypothetical protein STM2139,2n                       | 2.04          | 0.00800 | 1.76          | 0.00347 | 2.45          | 0.00025 |
| STM2140         | yegS       | putative diacylglycerol kinase                        | -0.70         | 0.17625 | 1.27          | 0.00528 | 1.76          | 0.00245 |
| STM2140         | yegS       | putative diacylglycerol kinase                        | 0.83          | 0.18059 | 1.18          | 0.01245 | 2.59          | 0.00106 |
| STM2141         | fbaB       | fructose-bisphosphate aldolase                        | 0.41          | 0.46047 | 4.05          | 0.00001 | 3.74          | 0.00008 |
| STM2141         | fbaB       | fructose-bisphosphate aldolase                        | 2.24          | 0.01431 | 3.48          | 0.00008 | 4.63          | 0.00003 |
| STM2142         | yegT       | putative transport protein                            | -0.39         | 0.45912 | 0.18          | 0.56067 | 0.53          | 0.24553 |
| STM2142         | yegT       | putative transport protein                            | 0.46          | 0.39581 | 0.18          | 0.55009 | 0.83          | 0.07452 |
| STM2143         | yegU       | putative glycohydrolase                               | -0.33         | 0.60637 | -0.66         | 0.32045 | -1.32         | 0.03094 |
| STM2143         | yegU       | putative glycohydrolase                               | 1.00          | 0.07033 | -0.71         | 0.02493 | -0.58         | 0.19781 |
| STM2144         | yegV       | putative sugar kinase                                 | -0.17         | 0.85117 | -0.18         | 0.61477 | 0.94          | 0.18476 |
| STM2144         | yegV       | putative sugar kinase                                 | -1.93         | 0.02357 | -0.31         | 0.42194 | -1.50         | 0.05910 |
| STM2145         | yegW       | putative regulatory protein                           | -0.80         | 0.31859 | 0.68          | 0.04630 | -0.39         | 0.61159 |
| STM2145         | yegW       | putative regulatory protein                           | 0.04          | 0.93135 | 1.07          | 0.01062 | -0.43         | 0.47598 |

**Table S2.** Genome-wide expression of *Salmonella enterica* serovar Typhimurium inside fibroblasts

Intracellular WT 24 h p.i.      Intracellular *phoP* 24 h p.i.      Extracellular WT stationary phase

Relative to WT exponential LB      Relative to *phoP* exponential LB      Relative to WT exponential LB



| Systematic name | Gene     | Product                                                    | log2Ratio (M) | p value | log2Ratio (M) | p value | log2Ratio (M) | p value |
|-----------------|----------|------------------------------------------------------------|---------------|---------|---------------|---------|---------------|---------|
| STM2146         | thiD     | phosphomethylpyrimidine kinase                             | 0.32          | 0.49007 | 3.93          | 0.00002 | 0.01          | 0.98233 |
| STM2146         | thiD     | phosphomethylpyrimidine kinase                             | 0.78          | 0.11322 | 3.74          | 0.00003 | 1.21          | 0.02584 |
| STM2147         | thiM     | hydroxyethylthiazole kinase                                | -0.58         | 0.21687 | 3.28          | 0.00003 | -0.35         | 0.57688 |
| STM2147         | thiM     | hydroxyethylthiazole kinase                                | 1.13          | 0.14205 | 3.42          | 0.00006 | -0.39         | 0.51345 |
| STM2148         | STM2148  | putative periplasmic protein                               | -0.10         | 0.83116 | 0.16          | 0.61534 | -0.27         | 0.44088 |
| STM2148         | STM2148  | putative periplasmic protein                               | 1.24          | 0.04148 | 0.12          | 0.67697 | 0.49          | 0.20118 |
| STM2149         | stcD     | putative outer membrane lipoprotein                        | 0.60          | 0.25571 | 0.85          | 0.07414 | 0.18          | 0.69757 |
| STM2149         | stcD     | putative outer membrane lipoprotein                        | 0.60          | 0.36771 | 0.66          | 0.12751 | 0.25          | 0.57027 |
| STM2150         | stcC     | putative outer membrane protein                            | -0.51         | 0.49324 | 0.01          | 0.97436 | -1.54         | 0.02899 |
| STM2150         | stcC     | putative outer membrane protein                            | 1.34          | 0.05962 | 0.23          | 0.71785 | 0.54          | 0.20240 |
| STM2151         | stcB     | putative periplasmic chaperone protein                     | 0.20          | 0.79922 | 0.65          | 0.08774 | 0.32          | 0.49292 |
| STM2151         | stcB     | putative periplasmic chaperone protein                     | 0.27          | 0.57682 | -0.59         | 0.35042 | 0.79          | 0.23842 |
| STM2152         | stcA     | putative fimbrial-like protein                             | 0.13          | 0.87730 | -0.22         | 0.72795 | -0.16         | 0.81580 |
| STM2152         | stcA     | putative fimbrial-like protein                             | 1.13          | 0.41632 | -0.08         | 0.87789 | 1.07          | 0.02245 |
| STM2153         | yehE     | putative outer membrane protein                            | -1.14         | 0.05303 | -0.41         | 0.16554 | -0.23         | 0.67281 |
| STM2153         | yehE     | putative outer membrane protein                            | -0.48         | 0.35322 | -0.37         | 0.24900 | -0.75         | 0.08267 |
| STM2154         | mrp      | putative ATP-binding protein                               | -1.07         | 0.23434 | -0.47         | 0.11993 | -0.89         | 0.06344 |
| STM2154         | mrp      | putative ATP-binding protein                               | -0.83         | 0.11754 | -0.34         | 0.23845 | -0.82         | 0.09859 |
| STM2155         | metG     | methionyl-tRNA synthetase                                  | -0.64         | 0.39473 | -0.63         | 0.04330 | 0.20          | 0.66322 |
| STM2155         | metG     | methionyl-tRNA synthetase                                  | -0.33         | 0.60635 | -1.10         | 0.00597 | -1.10         | 0.03641 |
| STM2156         | yehR     | putative lipoprotein                                       | 1.30          | 0.06959 | 0.05          | 0.91828 | 1.77          | 0.00280 |
| STM2156         | yehR     | putative lipoprotein                                       | 2.05          | 0.04208 | -0.09         | 0.85092 | 2.19          | 0.00099 |
| STM2156A        | STM2156A | hypothetical protein STM2156A                              | -0.84         | 0.11953 | 0.06          | 0.85622 | -0.66         | 0.10811 |
| STM2156A        | STM2156A | hypothetical protein STM2156A                              | -0.38         | 0.49605 | -0.48         | 0.15583 | -0.32         | 0.40622 |
| STM2157         | yehS     | putative cytoplasmic protein                               | -1.12         | 0.06568 | -0.65         | 0.07129 | -1.47         | 0.00457 |
| STM2157         | yehS     | putative cytoplasmic protein                               | 0.74          | 0.63875 | -0.81         | 0.09540 | -1.26         | 0.19350 |
| STM2158         | yehT     | putative regulatory protein                                | -1.26         | 0.11400 | -0.32         | 0.34305 | -0.43         | 0.26108 |
| STM2158         | yehT     | putative regulatory protein                                | -1.11         | 0.08517 | -0.84         | 0.01645 | -0.33         | 0.65860 |
| STM2159         | yehU     | putative sensor kinase                                     | -0.99         | 0.08078 | -0.43         | 0.27289 | -1.40         | 0.01040 |
| STM2159         | yehU     | putative sensor kinase                                     | 1.29          | 0.05515 | -0.84         | 0.02857 | -0.08         | 0.84514 |
| STM2160         | yehV     | putative transcriptional repressor                         | 2.38          | 0.00755 | 1.25          | 0.00277 | 2.46          | 0.00047 |
| STM2160         | yehV     | putative transcriptional repressor                         | 3.14          | 0.00547 | 1.44          | 0.00214 | 3.12          | 0.00035 |
| STM2162         | yehW     | putative ABC-type proline/glycine betaine transport system | -1.14         | 0.03561 | -0.14         | 0.66490 | 0.97          | 0.01931 |
| STM2162         | yehW     | putative ABC-type proline/glycine betaine transport system | -0.12         | 0.82172 | 0.86          | 0.03395 | 1.34          | 0.00592 |
| STM2163         | yehX     | putative ABC-type proline/glycine betaine transport system | 0.46          | 0.45509 | -0.72         | 0.03244 | -0.69         | 0.16137 |
| STM2163         | yehX     | putative ABC-type proline/glycine betaine transport system | 0.99          | 0.19975 | -0.02         | 0.95677 | -0.16         | 0.72025 |
| STM2164         | yehY     | putative ABC-type proline/glycine betaine transport system | -0.78         | 0.17944 | -0.12         | 0.70638 | -0.75         | 0.12030 |
| STM2164         | yehY     | putative ABC-type proline/glycine betaine transport system | 0.11          | 0.80508 | 0.15          | 0.76429 | 0.11          | 0.84249 |
| STM2165         | yehZ     | putative transport protein                                 | 0.08          | 0.89893 | 2.15          | 0.00049 | 1.16          | 0.02418 |
| STM2165         | yehZ     | putative transport protein                                 | 1.28          | 0.02652 | 2.04          | 0.00039 | 2.78          | 0.00017 |
| STM2166         | bglX     | periplasmic beta-D-glucoside glucohydrolase                | -1.01         | 0.12210 | -1.02         | 0.02447 | 0.02          | 0.96216 |
| STM2166         | bglX     | periplasmic beta-D-glucoside glucohydrolase                | -0.06         | 0.89679 | -1.26         | 0.00500 | 0.51          | 0.26344 |
| STM2167         | dld      | D-lactate dehydrogenase                                    | -0.60         | 0.23262 | 0.19          | 0.53204 | -0.08         | 0.85719 |
| STM2167         | dld      | D-lactate dehydrogenase                                    | 1.22          | 0.03095 | -0.48         | 0.13437 | 0.46          | 0.27866 |
| STM2168         | pbpG     | D-alanyl-D-alanine endopeptidase                           | -0.42         | 0.40158 | -1.28         | 0.00413 | -1.06         | 0.05240 |
| STM2168         | pbpG     | D-alanyl-D-alanine endopeptidase                           | -0.60         | 0.29275 | -1.20         | 0.00858 | -1.44         | 0.01309 |
| STM2169         | yohC     | putative transport protein                                 | -0.78         | 0.09128 | 0.42          | 0.19221 | 4.10          | 0.00004 |
| STM2169         | yohC     | putative transport protein                                 | 0.16          | 0.73728 | 0.55          | 0.06501 | 4.57          | 0.00005 |
| STM2170         | yohD     | hypothetical protein STM2170                               | 0.62          | 0.20480 | 1.27          | 0.02674 | 1.36          | 0.00642 |
| STM2170         | yohD     | hypothetical protein STM2170                               | 1.31          | 0.13262 | -0.40         | 0.50034 | -0.16         | 0.83179 |
| STM2171         | yohF     | oxidoreductase                                             | 0.06          | 0.93292 | 0.90          | 0.00963 | 2.62          | 0.00215 |
| STM2171         | yohF     | oxidoreductase                                             | 2.23          | 0.02991 | 1.09          | 0.00785 | 3.73          | 0.00008 |
| STM2172         | yohG     | putative outer membrane efflux protein                     | -0.35         | 0.58596 | 0.72          | 0.20750 | 1.42          | 0.00343 |
| STM2172         | yohG     | putative outer membrane efflux protein                     | 1.64          | 0.36222 | -1.16         | 0.10395 | -0.57         | 0.45068 |
| STM2174         | yohI     | putative regulatory protein                                | 0.72          | 0.36007 | 0.40          | 0.29907 | 1.16          | 0.10705 |
| STM2174         | yohI     | putative regulatory protein                                | 1.15          | 0.06881 | -0.48         | 0.14966 | 1.75          | 0.01429 |
| STM2175         | STM2175  | salicylate hydroxylase                                     | -0.92         | 0.18217 | 0.24          | 0.60967 | -0.55         | 0.36296 |
| STM2175         | STM2175  | salicylate hydroxylase                                     | -0.86         | 0.10292 | -0.67         | 0.22043 | 0.90          | 0.08345 |
| STM2176         | STM2176  | putative glutathione S-transferase                         | -0.68         | 0.18762 | 0.27          | 0.43190 | -0.47         | 0.48976 |
| STM2176         | STM2176  | putative glutathione S-transferase                         | 0.74          | 0.33947 | 1.82          | 0.01809 | 0.58          | 0.14412 |
| STM2177         | STM2177  | putative glutathione S-transferase                         | 0.34          | 0.45264 | -0.03         | 0.94963 | -0.20         | 0.59330 |
| STM2177         | STM2177  | putative glutathione S-transferase                         | 0.30          | 0.50620 | -0.20         | 0.56704 | 0.99          | 0.03578 |
| STM2178         | STM2178  | putative 1,2-dioxygenase                                   | 0.05          | 0.91861 | 0.38          | 0.27726 | 0.67          | 0.15094 |
| STM2178         | STM2178  | putative 1,2-dioxygenase                                   | 0.24          | 0.79088 | 0.56          | 0.09539 | 0.82          | 0.08422 |
| STM2179         | STM2179  | putative sugar transporter                                 | -0.11         | 0.88250 | -0.37         | 0.31387 | -0.68         | 0.10540 |
| STM2179         | STM2179  | putative sugar transporter                                 | 2.23          | 0.00889 | -0.62         | 0.10608 | 1.31          | 0.07482 |
| STM2180         | STM2180  | putative transcriptional regulator                         | 0.47          | 0.46283 | -0.21         | 0.57303 | 0.68          | 0.07886 |
| STM2180         | STM2180  | putative transcriptional regulator                         | 2.07          | 0.03182 | -0.47         | 0.23708 | 0.93          | 0.02949 |
| STM2181         | yohJ     | hypothetical protein STM2181                               | 0.15          | 0.70320 | 1.04          | 0.01722 | 0.78          | 0.06727 |
| STM2181         | yohJ     | hypothetical protein STM2181                               | 0.41          | 0.40670 | 0.88          | 0.07178 | 0.96          | 0.03761 |

**Table S2.** Genome-wide expression of *Salmonella enterica* serovar Typhimurium inside fibroblasts

Intracellular WT 24 h p.i.      Intracellular *phoP* 24 h p.i.      Extracellular WT stationary phase

Relative to WT exponential LB      Relative to *phoP* exponential LB      Relative to WT exponential LB



| Systematic name | Gene    | Product                                                   | log2Ratio (M) | p value | log2Ratio (M) | p value | log2Ratio (M) | p value |
|-----------------|---------|-----------------------------------------------------------|---------------|---------|---------------|---------|---------------|---------|
| STM2182         | yohK    | hypothetical protein STM2182                              | -0.27         | 0.65007 | 0.50          | 0.08184 | -0.67         | 0.09708 |
| STM2182         | yohK    | hypothetical protein STM2182                              | 0.48          | 0.26308 | 0.43          | 0.19652 | 0.38          | 0.27692 |
| STM2183         | cdd     | cytidine deaminase                                        | -0.56         | 0.49254 | -0.64         | 0.07355 | -1.66         | 0.01308 |
| STM2183         | cdd     | cytidine deaminase                                        | -0.53         | 0.44659 | -1.30         | 0.00387 | -1.17         | 0.15468 |
| STM2184         | sanA    | vancomycin sensitivity                                    | -1.22         | 0.03253 | -0.72         | 0.03665 | -1.18         | 0.13878 |
| STM2184         | sanA    | vancomycin sensitivity                                    | -0.61         | 0.20560 | -1.09         | 0.03531 | -0.78         | 0.33514 |
| STM2185         | b2145   | putative inner membrane protein                           | -0.58         | 0.31205 | -1.23         | 0.00609 | -0.78         | 0.08336 |
| STM2185         | b2145   | putative inner membrane protein                           | -1.04         | 0.31106 | -1.20         | 0.00696 | -0.17         | 0.67083 |
| STM2186         | STM2186 | putative NADPH-dependent glutamate synthase beta chain    | -0.74         | 0.21372 | -0.65         | 0.09080 | -0.82         | 0.14199 |
| STM2186         | STM2186 | putative NADPH-dependent glutamate synthase beta chain    | 0.58          | 0.24030 | -0.94         | 0.06107 | 0.32          | 0.43094 |
| STM2187         | yeiA    | dihydropyrimidine dehydrogenase                           | 0.15          | 0.84786 | 0.98          | 0.04908 | 1.56          | 0.09609 |
| STM2187         | yeiA    | dihydropyrimidine dehydrogenase                           | 0.71          | 0.40751 | -0.11         | 0.82048 | -0.55         | 0.60212 |
| STM2188         | mglC    | beta-methylgalactoside transporter inner membrane         | 0.47          | 0.52834 | -0.01         | 0.97385 | -0.16         | 0.82029 |
| STM2188         | mglC    | beta-methylgalactoside transporter inner membrane         | 2.28          | 0.00704 | -1.20         | 0.01095 | 0.32          | 0.39483 |
| STM2189         | mglA    | methyl-galactoside transport protein                      | 0.08          | 0.91368 | 0.44          | 0.24553 | 0.31          | 0.53258 |
| STM2189         | mglA    | methyl-galactoside transport protein                      | 1.61          | 0.26359 | 0.66          | 0.06811 | 0.82          | 0.27981 |
| STM2190         | mglB    | galactose transport protein                               | -0.12         | 0.81450 | 1.89          | 0.00151 | 0.21          | 0.61858 |
| STM2190         | mglB    | galactose transport protein                               | 0.26          | 0.62017 | 1.79          | 0.00111 | 0.90          | 0.03674 |
| STM2191         | galS    | mgl operon transcriptional repressor                      | 0.23          | 0.57178 | 0.93          | 0.03442 | -0.66         | 0.25364 |
| STM2191         | galS    | mgl operon transcriptional repressor                      | 1.43          | 0.02344 | 1.24          | 0.01013 | 1.41          | 0.01056 |
| STM2192         | yeiB    | putative inner membrane protein                           | -0.48         | 0.28744 | 0.08          | 0.82326 | -0.18         | 0.67398 |
| STM2192         | yeiB    | putative inner membrane protein                           | -0.32         | 0.47999 | -0.45         | 0.11413 | -0.10         | 0.83630 |
| STM2193         | folE    | GTP cyclohydrolase I                                      | -1.70         | 0.01215 | 0.23          | 0.46008 | -0.35         | 0.35981 |
| STM2193         | folE    | GTP cyclohydrolase I                                      | -0.73         | 0.14131 | 0.05          | 0.86885 | -0.70         | 0.20262 |
| STM2194         | yeiG    | putative esterase                                         | -0.43         | 0.45204 | -0.09         | 0.78476 | -0.02         | 0.95904 |
| STM2194         | yeiG    | putative esterase                                         | 0.50          | 0.29330 | 0.81          | 0.02251 | -0.04         | 0.93710 |
| STM2195         | STM2195 | putative transcriptional regulator                        | -0.51         | 0.31125 | -0.45         | 0.21820 | -1.04         | 0.04572 |
| STM2195         | STM2195 | putative transcriptional regulator                        | 0.32          | 0.54395 | 0.27          | 0.31587 | -0.61         | 0.14129 |
| STM2196         | STM2196 | putative L-serine dehydratase                             | -0.35         | 0.50018 | 0.72          | 0.04091 | -0.08         | 0.87342 |
| STM2196         | STM2196 | putative L-serine dehydratase                             | 1.21          | 0.09173 | 0.23          | 0.45541 | -0.47         | 0.20668 |
| STM2197         | STM2197 | putative phosphoserine phosphatase                        | 0.34          | 0.59791 | 1.16          | 0.01497 | 1.08          | 0.09494 |
| STM2197         | STM2197 | putative phosphoserine phosphatase                        | 1.57          | 0.03206 | -0.58         | 0.26256 | 1.41          | 0.01165 |
| STM2198         | STM2198 | putative regulatory protein                               | 0.45          | 0.29310 | 1.93          | 0.00150 | -0.20         | 0.73391 |
| STM2198         | STM2198 | putative regulatory protein                               | 0.98          | 0.09173 | 2.19          | 0.00049 | 0.62          | 0.24183 |
| STM2199         | cirA    | colicin I receptor protein                                | -0.54         | 0.34217 | 2.25          | 0.00043 | -0.69         | 0.15440 |
| STM2199         | cirA    | colicin I receptor protein                                | 0.81          | 0.12984 | 2.06          | 0.00056 | 1.35          | 0.02565 |
| STM2200         | lysP    | lysine-specific permease                                  | -2.02         | 0.00796 | -0.20         | 0.80599 | -0.96         | 0.16577 |
| STM2200         | lysP    | lysine-specific permease                                  | -1.05         | 0.16316 | -0.91         | 0.39695 | 0.34          | 0.76710 |
| STM2201         | yeiE    | putative transcriptional regulator                        | 0.03          | 0.94155 | 0.24          | 0.50029 | 0.83          | 0.05988 |
| STM2201         | yeiE    | putative transcriptional regulator                        | -0.16         | 0.70999 | 0.41          | 0.32147 | -0.31         | 0.41189 |
| STM2202         | yeiH    | putative inner membrane protein                           | -1.08         | 0.06140 | -1.74         | 0.01430 | -2.01         | 0.00471 |
| STM2202         | yeiH    | putative inner membrane protein                           | -0.46         | 0.34372 | -0.72         | 0.03899 | -1.42         | 0.03886 |
| STM2203         | nfo     | endonuclease IV                                           | -2.15         | 0.00747 | -1.06         | 0.01126 | -1.88         | 0.01287 |
| STM2203         | nfo     | endonuclease IV                                           | -1.51         | 0.02766 | -1.61         | 0.00128 | -2.18         | 0.00069 |
| STM2204         | fruA    | fructose-specific transport protein                       | -1.47         | 0.02567 | -1.01         | 0.05812 | -3.19         | 0.00038 |
| STM2204         | fruA    | fructose-specific transport protein                       | -0.49         | 0.43235 | -1.59         | 0.00396 | -2.65         | 0.00042 |
| STM2205         | fruK    | 1-phosphofructokinase                                     | -2.52         | 0.00741 | -1.18         | 0.00603 | -2.14         | 0.00391 |
| STM2205         | fruK    | 1-phosphofructokinase                                     | -2.00         | 0.01468 | -1.25         | 0.00675 | -2.72         | 0.00123 |
| STM2206         | fruF    | phosphoenolpyruvate-dependent sugar phosphotransferase    | -2.48         | 0.00753 | -1.94         | 0.00054 | -4.32         | 0.00009 |
| STM2206         | fruF    | phosphoenolpyruvate-dependent sugar phosphotransferase    | -2.35         | 0.05069 | -1.49         | 0.00517 | -3.15         | 0.00016 |
| STM2207         | setB    | proton efflux pump                                        | -0.68         | 0.21565 | -0.06         | 0.86398 | -1.09         | 0.01158 |
| STM2207         | setB    | proton efflux pump                                        | -0.08         | 0.86838 | -1.26         | 0.02469 | -0.29         | 0.41603 |
| STM2208         | STM2208 | putative inner membrane protein                           | -0.18         | 0.73115 | 0.45          | 0.34537 | -0.24         | 0.58025 |
| STM2208         | STM2208 | putative inner membrane protein                           | 1.00          | 0.45246 | -0.24         | 0.54928 | -1.25         | 0.03627 |
| STM2209         | STM2209 | putative inner membrane protein                           | -0.38         | 0.45785 | 0.23          | 0.48899 | 0.32          | 0.52541 |
| STM2209         | STM2209 | putative inner membrane protein                           | 0.32          | 0.78985 | -0.70         | 0.14270 | -0.03         | 0.96190 |
| STM2211,S       | yeiP    | elongation factor P                                       | -1.07         | 0.04399 | -1.23         | 0.00384 | -1.77         | 0.00513 |
| STM2211,S       | yeiP    | elongation factor P                                       | -0.27         | 0.57072 | -1.54         | 0.00281 | -1.00         | 0.06830 |
| STM2212         | yeiR    | putative cobalamin biosynthetic protein                   | -1.01         | 0.07361 | -0.25         | 0.40398 | -0.55         | 0.15176 |
| STM2212         | yeiR    | putative cobalamin biosynthetic protein                   | 0.38          | 0.61142 | -0.33         | 0.41528 | 0.39          | 0.35037 |
| STM2213         | yeiU    | putative permease                                         | -1.61         | 0.02885 | -0.12         | 0.69778 | -2.36         | 0.02649 |
| STM2213         | yeiU    | putative permease                                         | -1.89         | 0.02116 | -0.80         | 0.02259 | -2.65         | 0.00623 |
| STM2214         | spr     | putative lipoprotein                                      | -2.26         | 0.00727 | -1.20         | 0.00425 | -2.37         | 0.00041 |
| STM2214         | spr     | putative lipoprotein                                      | -1.82         | 0.01083 | -0.64         | 0.09602 | -1.93         | 0.00175 |
| STM2215         | rtn     | hypothetical protein STM2215                              | -0.80         | 0.18171 | -0.59         | 0.18268 | -0.28         | 0.56675 |
| STM2215         | rtn     | hypothetical protein STM2215                              | 0.11          | 0.87510 | -0.83         | 0.06001 | 0.70          | 0.10251 |
| STM2216         | yejA    | putative ABC transporter periplasmic binding protein      | -0.23         | 0.65039 | 0.28          | 0.35851 | -0.31         | 0.51429 |
| STM2216         | yejA    | putative ABC transporter periplasmic binding protein      | -0.17         | 0.70804 | -0.29         | 0.34632 | 0.50          | 0.57927 |
| STM2217         | yeyB    | putative ABC-type dipeptide/oligopeptide/nickel transport | -1.50         | 0.03436 | -0.58         | 0.14400 | -0.76         | 0.15863 |
| STM2217         | yeyB    | putative ABC-type dipeptide/oligopeptide/nickel transport | 0.31          | 0.72602 | -0.48         | 0.25939 | -0.14         | 0.79443 |

**Table S2.** Genome-wide expression of *Salmonella enterica* serovar Typhimurium inside fibroblasts

Intracellular WT 24 h p.i.      Intracellular *phoP* 24 h p.i.      Extracellular WT stationary phase

Relative to WT exponential LB      Relative to *phoP* exponential LB      Relative to WT exponential LB



| Systematic name | Gene     | Product                                                   | log2Ratio (M) | p value | log2Ratio (M) | p value | log2Ratio (M) | p value |
|-----------------|----------|-----------------------------------------------------------|---------------|---------|---------------|---------|---------------|---------|
| STM2218         | yejE     | putative ABC-type dipeptide/oligopeptide/nickel transport | -0.52         | 0.41195 | -0.88         | 0.01440 | -0.59         | 0.38971 |
| STM2218         | yejE     | putative ABC-type dipeptide/oligopeptide/nickel transport | -0.49         | 0.34691 | -0.62         | 0.03970 | -0.03         | 0.94619 |
| STM2219         | yejF     | putative ABC-type transport system ATPase component       | -0.05         | 0.91880 | 0.34          | 0.34103 | -1.41         | 0.03173 |
| STM2219         | yejF     | putative ABC-type transport system ATPase component       | 1.43          | 0.12247 | -0.04         | 0.91733 | -0.55         | 0.39283 |
| STM2220         | yejG     | putative cytoplasmic protein                              | -0.34         | 0.56778 | 0.33          | 0.31238 | -0.79         | 0.05275 |
| STM2220         | yejG     | putative cytoplasmic protein                              | 0.40          | 0.43513 | 0.17          | 0.60834 | -0.48         | 0.16687 |
| STM2221         | bcr      | bicyclomycin resistance protein                           | -1.08         | 0.04212 | -0.31         | 0.30933 | -0.22         | 0.55646 |
| STM2221         | bcr      | bicyclomycin resistance protein                           | -0.89         | 0.10850 | -0.60         | 0.07502 | -0.70         | 0.14341 |
| STM2222         | rsuA     | 16S rRNA pseudouridylylase 516 synthase                   | -0.55         | 0.54459 | -1.13         | 0.01655 | -1.44         | 0.07473 |
| STM2222         | rsuA     | 16S rRNA pseudouridylylase 516 synthase                   | -1.04         | 0.06216 | -0.89         | 0.02019 | -1.51         | 0.00733 |
| STM2223         | yejH     | putative ATP-dependent helicase                           | -0.26         | 0.66164 | -0.36         | 0.47004 | -0.97         | 0.13523 |
| STM2223         | yejH     | putative ATP-dependent helicase                           | -0.20         | 0.77775 | -0.66         | 0.04306 | -1.41         | 0.03152 |
| STM2224         | rplY     | 50S ribosomal protein L25                                 | -0.75         | 0.18441 | -0.79         | 0.02635 | -3.73         | 0.00020 |
| STM2224         | rplY     | 50S ribosomal protein L25                                 | 0.06          | 0.93319 | -0.84         | 0.02532 | -2.10         | 0.00093 |
| STM2225         | STM2225  | putative inner membrane protein                           | -1.77         | 0.02597 | -0.32         | 0.39332 | -0.52         | 0.17595 |
| STM2225         | STM2225  | putative inner membrane protein                           | -0.48         | 0.61958 | -0.35         | 0.44186 | -0.34         | 0.40201 |
| STM2226         | yejK     | nucleoid-associated protein NdpA                          | 1.52          | 0.15968 | -0.11         | 0.70369 | -0.26         | 0.81357 |
| STM2226         | yejK     | nucleoid-associated protein NdpA                          | 2.95          | 0.00547 | -0.51         | 0.10664 | -1.01         | 0.05476 |
| STM2227         | yejL     | putative cytoplasmic protein                              | -2.27         | 0.00694 | -1.27         | 0.00647 | -2.29         | 0.00051 |
| STM2227         | yejL     | putative cytoplasmic protein                              | -2.20         | 0.01164 | -1.05         | 0.02570 | -1.79         | 0.00335 |
| STM2228         | yejM     | putative hydrolase                                        | -0.72         | 0.16482 | -0.55         | 0.31309 | 0.39          | 0.46274 |
| STM2228         | yejM     | putative hydrolase                                        | -1.29         | 0.09097 | -0.33         | 0.31491 | -0.33         | 0.37884 |
| STM2229         | tRNAPro2 | STM2229                                                   | -0.11         | 0.84899 | 0.41          | 0.49686 | 0.75          | 0.00038 |
| STM2229         | tRNAPro2 | STM2229                                                   | 0.22          | 0.61745 | -0.95         | 0.01646 | 2.71          | 0.00020 |
| STM2231         | STM2231  | virulence protein                                         | -0.60         | 0.52776 | -1.49         | 0.03522 | -0.25         | 0.72346 |
| STM2231         | STM2231  | virulence protein                                         | 0.35          | 0.48093 | -1.10         | 0.02543 | 0.11          | 0.79951 |
| STM2232         | oafA     | O-antigen acetylase                                       | -1.24         | 0.06314 | -1.11         | 0.00918 | -0.50         | 0.41963 |
| STM2232         | oafA     | O-antigen acetylase                                       | -2.34         | 0.04995 | -1.35         | 0.00569 | -0.90         | 0.04268 |
| STM2233         | STM2233  | putative cytoplasmic protein                              | -0.58         | 0.27959 | 2.36          | 0.00046 | -0.49         | 0.47075 |
| STM2233         | STM2233  | putative cytoplasmic protein                              | 0.53          | 0.24220 | 2.15          | 0.00070 | 0.00          | 0.99365 |
| STM2234         | STM2234  | putative phage tail fiber assembly protein                | -1.26         | 0.07773 | 3.67          | 0.00011 | -1.02         | 0.17398 |
| STM2234         | STM2234  | putative phage tail fiber assembly protein                | -0.12         | 0.87029 | 4.21          | 0.00003 | -0.07         | 0.88099 |
| STM2235         | STM2235  | hypothetical protein STM2235                              | -0.55         | 0.42968 | 2.02          | 0.00504 | 2.27          | 0.00251 |
| STM2235         | STM2235  | hypothetical protein STM2235                              | -1.31         | 0.02540 | 1.00          | 0.01929 | 1.52          | 0.00872 |
| STM2236         | STM2236  | hypothetical protein STM2236                              | 0.90          | 0.28500 | 4.74          | 0.00001 | -0.17         | 0.78946 |
| STM2236         | STM2236  | hypothetical protein STM2236                              | 1.94          | 0.10271 | 4.83          | 0.00001 | 0.00          | 0.99691 |
| STM2237         | STM2237  | putative inner membrane protein                           | 0.83          | 0.12840 | 3.79          | 0.00008 | -1.45         | 0.01017 |
| STM2237         | STM2237  | putative inner membrane protein                           | 1.93          | 0.01530 | 4.01          | 0.00002 | 0.54          | 0.33187 |
| STM2238         | STM2238  | hypothetical protein STM2238                              | 0.53          | 0.35162 | -1.05         | 0.00790 | 0.39          | 0.57961 |
| STM2238         | STM2238  | hypothetical protein STM2238                              | 0.80          | 0.20880 | -0.73         | 0.08212 | 1.24          | 0.02912 |
| STM2240         | STM2240  | putative cytoplasmic protein                              | -0.33         | 0.62438 | 2.19          | 0.00061 | -0.45         | 0.40243 |
| STM2240         | STM2240  | putative cytoplasmic protein                              | 0.37          | 0.72951 | 2.38          | 0.00066 | -0.53         | 0.34160 |
| STM2240         | STM2240  | putative cytoplasmic protein                              | -0.15         | 0.83479 | 1.54          | 0.00273 | -1.01         | 0.11342 |
| STM2240         | STM2240  | putative cytoplasmic protein                              | 0.43          | 0.64924 | 2.96          | 0.00005 | 0.61          | 0.26953 |
| STM2241         | sspH2    | leucine-rich repeat protein                               | 0.08          | 0.87990 | 4.67          | 0.00001 | -1.31         | 0.01435 |
| STM2241         | sspH2    | leucine-rich repeat protein                               | 1.41          | 0.02339 | 4.62          | 0.00002 | 0.26          | 0.56064 |
| STM2242         | STM2242  | putative phage tail fiber protein                         | 1.71          | 0.08975 | 3.09          | 0.00005 | 0.35          | 0.62494 |
| STM2242         | STM2242  | putative phage tail fiber protein                         | 2.23          | 0.02598 | 2.85          | 0.00013 | 1.41          | 0.00754 |
| STM2243         | STM2243  | putative tail fiber protein of phage                      | 0.83          | 0.17511 | 0.73          | 0.03986 | -1.05         | 0.13751 |
| STM2243         | STM2243  | putative tail fiber protein of phage                      | 1.11          | 0.05633 | 0.83          | 0.07107 | 0.52          | 0.19851 |
| STM2245         | pagL     | putative outer membrane protein                           | 0.91          | 0.36919 | 0.06          | 0.94382 | 0.83          | 0.11003 |
| STM2245         | pagL     | putative outer membrane protein                           | 2.94          | 0.00764 | -0.95         | 0.06988 | 0.99          | 0.08957 |
| STM2246         | narP     | response regulator                                        | -0.27         | 0.59556 | -0.70         | 0.08853 | -1.05         | 0.02477 |
| STM2246         | narP     | response regulator                                        | 0.79          | 0.13786 | 0.23          | 0.51552 | -1.27         | 0.09215 |
| STM2247         | ccmH     | putative heme lyase subunit                               | -0.64         | 0.20774 | 0.02          | 0.95605 | -1.12         | 0.08795 |
| STM2247         | ccmH     | putative heme lyase subunit                               | 0.21          | 0.68969 | -1.85         | 0.05051 | 0.63          | 0.13706 |
| STM2248         | ccmG     | heme lyase disulfide oxidoreductase                       | 1.03          | 0.26164 | -0.41         | 0.28788 | -0.26         | 0.49893 |
| STM2248         | ccmG     | heme lyase disulfide oxidoreductase                       | 2.24          | 0.08505 | -0.76         | 0.04859 | 0.82          | 0.09755 |
| STM2249         | ccmF     | cytochrome c-type biogenesis protein                      | 0.50          | 0.32538 | -1.43         | 0.00433 | 0.16          | 0.73863 |
| STM2249         | ccmF     | cytochrome c-type biogenesis protein                      | 0.55          | 0.43044 | -1.92         | 0.00067 | 0.03          | 0.96969 |
| STM2250         | ccmE     | periplasmic heme-dependent peroxidase                     | 2.49          | 0.01566 | -0.19         | 0.53261 | 0.04          | 0.95174 |
| STM2250         | ccmE     | periplasmic heme-dependent peroxidase                     | 2.85          | 0.00547 | -0.16         | 0.72481 | 1.27          | 0.02640 |
| STM2251         | ccmD     | heme exporter protein C                                   | 0.84          | 0.10045 | -0.42         | 0.23096 | -1.51         | 0.03785 |
| STM2251         | ccmD     | heme exporter protein C                                   | 1.11          | 0.04359 | -0.59         | 0.14400 | -0.19         | 0.64894 |
| STM2252         | ccmC     | heme exporter protein                                     | 0.70          | 0.12362 | -0.18         | 0.54864 | -0.75         | 0.13159 |
| STM2252         | ccmC     | heme exporter protein                                     | 1.59          | 0.10625 | -0.26         | 0.35113 | -0.55         | 0.25217 |
| STM2253         | ccmB     | heme exporter protein                                     | -0.65         | 0.14224 | 0.40          | 0.20797 | -2.13         | 0.00490 |
| STM2253         | ccmB     | heme exporter protein                                     | 0.29          | 0.70460 | 1.20          | 0.01168 | -0.61         | 0.15735 |
| STM2254         | ccmA     | heme exporter protein                                     | -0.76         | 0.14539 | -0.62         | 0.14501 | -1.05         | 0.08578 |
| STM2254         | ccmA     | heme exporter protein                                     | 0.23          | 0.64477 | -1.13         | 0.00910 | -1.70         | 0.00288 |

**Table S2.** Genome-wide expression of *Salmonella enterica* serovar Typhimurium inside fibroblasts

Intracellular WT 24 h p.i.      Intracellular *phoP* 24 h p.i.      Extracellular WT stationary phase

Relative to WT exponential LB      Relative to *phoP* exponential LB      Relative to WT exponential LB



| Systematic name | Gene    | Product                                                    | log2Ratio (M) | p value | log2Ratio (M) | p value | log2Ratio (M) | p value |
|-----------------|---------|------------------------------------------------------------|---------------|---------|---------------|---------|---------------|---------|
| STM2255         | napC    | periplasmic nitrate reductase                              | -1.00         | 0.07227 | -0.24         | 0.43484 | -1.26         | 0.00968 |
| STM2255         | napC    | periplasmic nitrate reductase                              | 0.32          | 0.70396 | -0.47         | 0.11030 | -0.39         | 0.32749 |
| STM2256         | napB    | periplasmic nitrate reductase                              | -0.17         | 0.74341 | -1.38         | 0.00341 | -1.14         | 0.01301 |
| STM2256         | napB    | periplasmic nitrate reductase                              | 0.33          | 0.61038 | -1.82         | 0.01250 | 0.18          | 0.72410 |
| STM2257         | napH    | quinol dehydrogenase membrane component                    | -0.34         | 0.41155 | -0.56         | 0.13103 | 0.69          | 0.25266 |
| STM2257         | napH    | quinol dehydrogenase membrane component                    | 1.91          | 0.00913 | -0.54         | 0.10343 | 0.51          | 0.43987 |
| STM2258         | napG    | quinol dehydrogenase periplasmic component                 | 0.96          | 0.17809 | -1.57         | 0.00290 | -1.06         | 0.19461 |
| STM2258         | napG    | quinol dehydrogenase periplasmic component                 | 0.91          | 0.27065 | -1.27         | 0.00391 | -0.25         | 0.60418 |
| STM2259         | napA    | periplasmic nitrate reductase                              | -1.84         | 0.04720 | -0.64         | 0.09183 | -1.47         | 0.01045 |
| STM2259         | napA    | periplasmic nitrate reductase                              | -1.60         | 0.04102 | -1.38         | 0.00561 | -0.34         | 0.54496 |
| STM2260         | napD    | periplasmic nitrate reductase                              | -0.62         | 0.40888 | -0.48         | 0.28124 | -0.13         | 0.86528 |
| STM2260         | napD    | periplasmic nitrate reductase                              | 1.11          | 0.29898 | -0.94         | 0.02769 | 0.30          | 0.58804 |
| STM2262         | eco     | ecotin precursor                                           | -0.32         | 0.63756 | 0.79          | 0.02179 | 0.60          | 0.14488 |
| STM2262         | eco     | ecotin precursor                                           | 0.19          | 0.87395 | 0.17          | 0.59337 | 1.82          | 0.00121 |
| STM2263         | yojI    | putative ABC-type multidrug/protein/lipid transport system | -0.96         | 0.10377 | -0.21         | 0.56986 | -1.32         | 0.02803 |
| STM2263         | yojI    | putative ABC-type multidrug/protein/lipid transport system | 0.21          | 0.68411 | -0.37         | 0.30681 | -0.55         | 0.20212 |
| STM2264         | alkB    | DNA repair system protein                                  | -0.03         | 0.97915 | -0.58         | 0.09507 | -1.01         | 0.04136 |
| STM2264         | alkB    | DNA repair system protein                                  | -0.20         | 0.73302 | -0.37         | 0.24728 | 1.53          | 0.28456 |
| STM2265         | ada     | O6-methylguanine-DNA methyltransferase/transcription       | -1.15         | 0.03585 | -0.30         | 0.36784 | -0.73         | 0.07142 |
| STM2265         | ada     | O6-methylguanine-DNA methyltransferase/transcription       | -0.09         | 0.90246 | -0.89         | 0.01316 | -0.31         | 0.54122 |
| STM2266         | apbE    | putative lipoprotein                                       | -1.27         | 0.11924 | -0.99         | 0.01203 | -1.45         | 0.01816 |
| STM2266         | apbE    | putative lipoprotein                                       | -0.50         | 0.40084 | -1.06         | 0.00475 | -1.44         | 0.00731 |
| STM2267         | ompC    | outer membrane protein C precursor                         | -4.48         | 0.00673 | -1.61         | 0.00405 | -3.81         | 0.02273 |
| STM2267         | ompC    | outer membrane protein C precursor                         | -3.54         | 0.00579 | -0.90         | 0.01098 | -4.71         | 0.00010 |
| STM2269         | yojN    | putative sensor kinase                                     | -1.40         | 0.02148 | 0.37          | 0.36364 | -0.58         | 0.10972 |
| STM2269         | yojN    | putative sensor kinase                                     | -0.80         | 0.11472 | 0.00          | 0.99505 | -0.40         | 0.29601 |
| STM2270         | rcsB    | response regulator                                         | -1.13         | 0.18196 | -0.36         | 0.29979 | -1.56         | 0.00317 |
| STM2270         | rcsB    | response regulator                                         | 0.11          | 0.82377 | -0.09         | 0.81837 | -0.94         | 0.07653 |
| STM2271         | rcsC    | sensory histidine kinase                                   | -0.99         | 0.06276 | -0.45         | 0.13167 | -1.07         | 0.02850 |
| STM2271         | rcsC    | sensory histidine kinase                                   | -0.11         | 0.90505 | -0.63         | 0.06483 | -0.27         | 0.46715 |
| STM2272         | gyrA    | DNA gyrase subunit A                                       | -0.25         | 0.61320 | -0.30         | 0.32575 | -1.30         | 0.02230 |
| STM2272         | gyrA    | DNA gyrase subunit A                                       | 0.37          | 0.39809 | -0.43         | 0.15033 | -0.31         | 0.57488 |
| STM2273         | STM2273 | putative dehydratase                                       | 0.14          | 0.84977 | -0.26         | 0.41378 | 0.40          | 0.46115 |
| STM2273         | STM2273 | putative dehydratase                                       | 0.70          | 0.31214 | -0.39         | 0.24385 | 0.50          | 0.30028 |
| STM2274         | STM2274 | putative permease                                          | -1.22         | 0.03642 | -1.31         | 0.00755 | -0.09         | 0.85872 |
| STM2274         | STM2274 | putative permease                                          | -0.74         | 0.63313 | -0.85         | 0.05528 | -0.03         | 0.96613 |
| STM2275         | STM2275 | putative regulatory protein                                | -1.15         | 0.03253 | -0.38         | 0.21527 | -0.59         | 0.11207 |
| STM2275         | STM2275 | putative regulatory protein                                | 1.94          | 0.01257 | -0.72         | 0.02737 | -0.29         | 0.43344 |
| STM2276         | ubiG    | 3-demethylubiquinone-9 3-methyltransferase                 | -1.73         | 0.18201 | -1.14         | 0.01021 | -0.86         | 0.08950 |
| STM2276         | ubiG    | 3-demethylubiquinone-9 3-methyltransferase                 | 1.18          | 0.35364 | -0.92         | 0.01245 | -0.89         | 0.08343 |
| STM2277         | nrdA    | ribonucleotide-diphosphate reductase alpha subunit         | -2.18         | 0.01725 | -1.34         | 0.00176 | -3.59         | 0.00010 |
| STM2277         | nrdA    | ribonucleotide-diphosphate reductase alpha subunit         | -1.79         | 0.01661 | -1.08         | 0.00532 | -3.42         | 0.00198 |
| STM2278         | nrdB    | ribonucleotide-diphosphate reductase beta subunit          | -2.14         | 0.00901 | -0.65         | 0.09868 | -3.07         | 0.00053 |
| STM2278         | nrdB    | ribonucleotide-diphosphate reductase beta subunit          | -0.82         | 0.17816 | -0.67         | 0.04883 | -1.85         | 0.00433 |
| STM2279         | yfaE    | putative ferredoxin                                        | -2.01         | 0.03095 | -1.68         | 0.00164 | -2.57         | 0.01509 |
| STM2279         | yfaE    | putative ferredoxin                                        | -1.04         | 0.18307 | -1.10         | 0.00739 | -1.72         | 0.00170 |
| STM2280         | STM2280 | putative permease                                          | -1.48         | 0.03575 | -0.96         | 0.05574 | -3.51         | 0.00006 |
| STM2280         | STM2280 | putative permease                                          | -0.31         | 0.60796 | -0.99         | 0.02363 | -0.67         | 0.20545 |
| STM2281         | STM2281 | putative transcriptional regulator                         | 1.06          | 0.25851 | 0.25          | 0.58842 | 1.59          | 0.38254 |
| STM2281         | STM2281 | putative transcriptional regulator                         | -0.07         | 0.86624 | 0.35          | 0.41793 | 0.56          | 0.29954 |
| STM2282         | glpQ    | periplasmic glycerophosphodiester phosphodiesterase        | 0.98          | 0.23289 | 1.24          | 0.04741 | 0.40          | 0.49672 |
| STM2282         | glpQ    | periplasmic glycerophosphodiester phosphodiesterase        | -0.38         | 0.74777 | 0.33          | 0.45942 | -2.40         | 0.04053 |
| STM2283         | glpT    | sn-glycerol-3-phosphate transport protein                  | -1.42         | 0.15626 | -0.15         | 0.66071 | -0.57         | 0.31407 |
| STM2283         | glpT    | sn-glycerol-3-phosphate transport protein                  | -0.53         | 0.36796 | 0.20          | 0.55564 | -0.92         | 0.08164 |
| STM2284         | glpA    | sn-glycerol-3-phosphate dehydrogenase large subunit        | -0.60         | 0.30050 | 0.61          | 0.20149 | 0.91          | 0.03777 |
| STM2284         | glpA    | sn-glycerol-3-phosphate dehydrogenase large subunit        | 1.44          | 0.02541 | 1.09          | 0.00759 | 2.62          | 0.00063 |
| STM2285         | glpB    | anaerobic glycerol-3-phosphate dehydrogenase subunit B     | 2.05          | 0.09378 | 1.08          | 0.01944 | 0.49          | 0.19382 |
| STM2285         | glpB    | anaerobic glycerol-3-phosphate dehydrogenase subunit B     | 2.35          | 0.04440 | 0.90          | 0.04428 | 0.70          | 0.12082 |
| STM2286         | glpC    | sn-glycerol-3-phosphate dehydrogenase K-small subunit      | 0.03          | 0.95272 | 1.55          | 0.00231 | 1.14          | 0.03408 |
| STM2286         | glpC    | sn-glycerol-3-phosphate dehydrogenase K-small subunit      | 1.25          | 0.05536 | 1.26          | 0.03549 | 1.62          | 0.00716 |
| STM2287         | sseL    | putative cytoplasmic protein                               | -0.10         | 0.92457 | 4.87          | 0.00003 | 1.35          | 0.01071 |
| STM2287         | sseL    | putative cytoplasmic protein                               | -0.87         | 0.19770 | 5.52          | 0.00004 | 0.33          | 0.69132 |
| STM2288         | STM2288 | putative cytoplasmic protein                               | -0.42         | 0.39064 | 3.63          | 0.00004 | 0.37          | 0.54437 |
| STM2288         | STM2288 | putative cytoplasmic protein                               | 0.38          | 0.44447 | 3.42          | 0.00023 | -0.07         | 0.90785 |
| STM2289         | STM2289 | putative 2,4-dihydroxyhept-2-ene-1,7-dioic acid aldolase   | -0.45         | 0.54585 | 2.47          | 0.00249 | 0.19          | 0.76378 |
| STM2289         | STM2289 | putative 2,4-dihydroxyhept-2-ene-1,7-dioic acid aldolase   | 1.16          | 0.15446 | 2.39          | 0.00020 | 0.70          | 0.21130 |
| STM2290         | yfaV    | putative transport protein                                 | 0.03          | 0.96815 | 0.00          | 0.99979 | -1.00         | 0.03638 |
| STM2290         | yfaV    | putative transport protein                                 | 0.51          | 0.38023 | -0.36         | 0.42618 | -0.20         | 0.73009 |
| STM2291         | yfaW    | putative galactonate dehydratase                           | 2.16          | 0.03081 | 0.38          | 0.66467 | 1.52          | 0.02694 |
| STM2291         | yfaW    | putative galactonate dehydratase                           | 1.10          | 0.26489 | 0.24          | 0.68081 | 1.14          | 0.35151 |



**Table S2.** Genome-wide expression of *Salmonella enterica* serovar Typhimurium inside fibroblasts

Intracellular WT 24 h p.i.      Intracellular *phoP* 24 h p.i.      Extracellular WT stationary phase

Relative to WT exponential LB      Relative to *phoP* exponential LB      Relative to WT exponential LB



| Systematic name | Gene    | Product                                               | log2Ratio (M) | p value | log2Ratio (M) | p value | log2Ratio (M) | p value |
|-----------------|---------|-------------------------------------------------------|---------------|---------|---------------|---------|---------------|---------|
| STM2327         | nuoB    | NADH dehydrogenase beta subunit                       | -3.50         | 0.00635 | -3.60         | 0.00016 | -3.75         | 0.00021 |
| STM2327         | nuoB    | NADH dehydrogenase beta subunit                       | -2.21         | 0.07824 | -3.28         | 0.00008 | -3.33         | 0.00021 |
| STM2328         | nuoA    | NADH dehydrogenase alpha subunit                      | -3.78         | 0.00512 | -3.60         | 0.00004 | -2.77         | 0.00017 |
| STM2328         | nuoA    | NADH dehydrogenase alpha subunit                      | -2.67         | 0.09923 | -3.94         | 0.00002 | -2.90         | 0.00018 |
| STM2329         | STM2329 | putative cytoplasmic protein                          | -2.24         | 0.01067 | -0.42         | 0.66287 | -2.09         | 0.00218 |
| STM2329         | STM2329 | putative cytoplasmic protein                          | -1.22         | 0.09359 | -1.67         | 0.00201 | -1.66         | 0.01366 |
| STM2330         | lrrA    | NADH dehydrogenase transcriptional repressor          | -1.49         | 0.07463 | -1.09         | 0.00824 | -1.10         | 0.12850 |
| STM2330         | lrrA    | NADH dehydrogenase transcriptional repressor          | -0.06         | 0.91149 | -0.75         | 0.05608 | -0.86         | 0.07300 |
| STM2331         | yfbQ    | aspartate aminotransferase                            | -0.54         | 0.27400 | -0.88         | 0.01888 | -1.70         | 0.00264 |
| STM2331         | yfbQ    | aspartate aminotransferase                            | -0.03         | 0.95842 | -0.69         | 0.07252 | -0.66         | 0.28751 |
| STM2332         | STM2332 | hypothetical protein STM2332                          | -0.12         | 0.77958 | 0.33          | 0.33086 | -0.64         | 0.08961 |
| STM2332         | STM2332 | hypothetical protein STM2332                          | 0.95          | 0.12117 | 0.24          | 0.43092 | -0.02         | 0.96800 |
| STM2333         | yfbS    | putative response regulator                           | -0.11         | 0.86650 | 0.47          | 0.11110 | -0.95         | 0.05051 |
| STM2333         | yfbS    | putative response regulator                           | -0.12         | 0.90635 | -0.58         | 0.15240 | -0.62         | 0.32920 |
| STM2334         | yfbT    | putative phosphatase                                  | -0.82         | 0.07892 | -0.15         | 0.70889 | -0.44         | 0.21966 |
| STM2334         | yfbT    | putative phosphatase                                  | -0.06         | 0.91689 | -0.05         | 0.88582 | 0.23          | 0.63009 |
| STM2335         | yfbU    | hypothetical protein STM2335                          | -1.63         | 0.02148 | -0.02         | 0.95323 | -0.71         | 0.06990 |
| STM2335         | yfbU    | hypothetical protein STM2335                          | -0.42         | 0.39063 | 0.39          | 0.21702 | -0.47         | 0.28849 |
| STM2336         | STM2336 | hypothetical protein STM2336                          | -1.53         | 0.01801 | -0.67         | 0.03824 | 0.30          | 0.48805 |
| STM2336         | STM2336 | hypothetical protein STM2336                          | -0.78         | 0.23242 | -0.38         | 0.27243 | 0.26          | 0.55899 |
| STM2337         | ackA    | acetate/propionate kinase                             | -4.41         | 0.00512 | -2.23         | 0.00036 | -3.47         | 0.00011 |
| STM2337         | ackA    | acetate/propionate kinase                             | -3.85         | 0.00512 | -1.97         | 0.00224 | -3.44         | 0.00008 |
| STM2338         | pta     | phosphate acetyltransferase                           | -1.40         | 0.03905 | -0.49         | 0.67136 | -2.14         | 0.00163 |
| STM2338         | pta     | phosphate acetyltransferase                           | -1.09         | 0.04496 | -1.45         | 0.00258 | -1.66         | 0.00644 |
| STM2339         | yfcC    | putative integral membrane protein                    | -1.22         | 0.08508 | 0.00          | 0.99395 | -0.47         | 0.50013 |
| STM2339         | yfcC    | putative integral membrane protein                    | -0.52         | 0.34627 | -0.33         | 0.33283 | -1.31         | 0.00609 |
| STM2340         | STM2340 | putative transketolase                                | -0.41         | 0.58595 | 0.24          | 0.48529 | 0.92          | 0.12789 |
| STM2340         | STM2340 | putative transketolase                                | 1.38          | 0.02217 | 1.35          | 0.04008 | 3.16          | 0.01077 |
| STM2341         | STM2341 | putative transketolase                                | -0.29         | 0.60249 | 0.46          | 0.34032 | -0.31         | 0.51384 |
| STM2341         | STM2341 | putative transketolase                                | 0.77          | 0.25119 | 0.16          | 0.59448 | 0.43          | 0.37839 |
| STM2342         | ulaA    | ascorbate-specific PTS system enzyme IIC              | 0.98          | 0.11805 | 0.68          | 0.11502 | 1.56          | 0.04016 |
| STM2342         | ulaA    | ascorbate-specific PTS system enzyme IIC              | 1.93          | 0.02024 | 0.86          | 0.03197 | 2.41          | 0.00153 |
| STM2343         | STM2343 | putative cytoplasmic protein                          | 0.34          | 0.42177 | 0.34          | 0.34941 | 0.24          | 0.61436 |
| STM2343         | STM2343 | putative cytoplasmic protein                          | 0.73          | 0.33259 | 0.90          | 0.03590 | 0.03          | 0.96777 |
| STM2344         | STM2344 | putative phosphotransferase system enzyme II A        | 0.96          | 0.19706 | 0.59          | 0.17728 | -0.17         | 0.75178 |
| STM2344         | STM2344 | putative phosphotransferase system enzyme II A        | 1.58          | 0.06280 | -0.04         | 0.92633 | 1.51          | 0.11764 |
| STM2345         | STM2345 | putative transcriptional regulator                    | -0.28         | 0.51958 | -0.24         | 0.45104 | -0.48         | 0.37964 |
| STM2345         | STM2345 | putative transcriptional regulator                    | 0.20          | 0.63587 | 0.11          | 0.73838 | 0.67          | 0.14216 |
| STM2346         | STM2346 | putative NTP pyrophosphohydrolase                     | 0.82          | 0.26877 | -0.23         | 0.52902 | -1.57         | 0.00374 |
| STM2346         | STM2346 | putative NTP pyrophosphohydrolase                     | 2.48          | 0.00900 | 0.04          | 0.89755 | -1.00         | 0.02141 |
| STM2347         | yfcE    | phosphodiesterase                                     | -0.34         | 0.74113 | 0.21          | 0.55780 | 2.00          | 0.00057 |
| STM2347         | yfcE    | phosphodiesterase                                     | -0.43         | 0.77775 | 0.23          | 0.55752 | 2.14          | 0.00079 |
| STM2348         | yfcF    | putative glutathione S-transferase                    | -0.96         | 0.07941 | 0.23          | 0.78417 | 0.46          | 0.46225 |
| STM2348         | yfcF    | putative glutathione S-transferase                    | 0.32          | 0.61172 | -0.40         | 0.17705 | 0.60          | 0.34298 |
| STM2349         | yfcG    | putative glutathione S-transferase                    | -1.06         | 0.27200 | 0.38          | 0.36702 | 1.40          | 0.01064 |
| STM2349         | yfcG    | putative glutathione S-transferase                    | -0.60         | 0.49397 | -0.30         | 0.71425 | 1.90          | 0.00380 |
| STM2350         | yfcH    | putative sugar nucleotide epimerase                   | -0.04         | 0.94628 | 0.58          | 0.17424 | 0.78          | 0.12234 |
| STM2350         | yfcH    | putative sugar nucleotide epimerase                   | 1.90          | 0.06648 | 0.67          | 0.10464 | 1.45          | 0.02096 |
| STM2351         | hisP    | histidine/lysine/arginine/ornithine transport protein | 1.58          | 0.02439 | -0.62         | 0.11909 | -0.12         | 0.81963 |
| STM2351         | hisP    | histidine/lysine/arginine/ornithine transport protein | 2.37          | 0.01041 | -0.80         | 0.25635 | 1.77          | 0.00253 |
| STM2352         | hisM    | histidine/lysine/arginine/ornithine transport protein | -1.21         | 0.06916 | -0.09         | 0.78832 | -1.59         | 0.00325 |
| STM2352         | hisM    | histidine/lysine/arginine/ornithine transport protein | -0.28         | 0.61038 | 0.10          | 0.78594 | 0.45          | 0.27366 |
| STM2353         | hisQ    | histidine/lysine/arginine/ornithine transport protein | -0.27         | 0.74257 | 0.28          | 0.40807 | -0.14         | 0.86591 |
| STM2353         | hisQ    | histidine/lysine/arginine/ornithine transport protein | 2.05          | 0.01057 | -0.74         | 0.36778 | 0.04          | 0.95985 |
| STM2354         | hisJ    | histidine transport protein                           | -1.31         | 0.02665 | 1.34          | 0.00215 | -0.89         | 0.06409 |
| STM2354         | hisJ    | histidine transport protein                           | -0.02         | 0.96468 | 1.30          | 0.00293 | -0.66         | 0.11313 |
| STM2355         | argT    | lysine/arginine/ornithine transport protein           | -0.72         | 0.17944 | 2.13          | 0.00015 | 1.05          | 0.03740 |
| STM2355         | argT    | lysine/arginine/ornithine transport protein           | 0.23          | 0.57930 | 1.49          | 0.00409 | 1.29          | 0.01694 |
| STM2356         | ubiX    | 3-octaprenyl-4-hydroxybenzoate carboxy-lyase          | -0.74         | 0.22540 | -0.35         | 0.28481 | 0.19          | 0.79417 |
| STM2356         | ubiX    | 3-octaprenyl-4-hydroxybenzoate carboxy-lyase          | 0.35          | 0.45345 | -0.33         | 0.36347 | 0.91          | 0.22632 |
| STM2357         | STM2357 | putative amino acid transporter                       | -1.34         | 0.02260 | 0.15          | 0.69962 | -0.37         | 0.31812 |
| STM2357         | STM2357 | putative amino acid transporter                       | -0.03         | 0.94585 | 0.34          | 0.41796 | 0.20          | 0.64637 |
| STM2358         | STM2358 | putative cytoplasmic protein                          | -0.50         | 0.29722 | -0.48         | 0.46640 | 0.72          | 0.20262 |
| STM2358         | STM2358 | putative cytoplasmic protein                          | 1.19          | 0.22062 | -0.46         | 0.30384 | -0.29         | 0.81063 |
| STM2359         | STM2359 | putative amino acid transporter                       | 0.29          | 0.71063 | 0.26          | 0.40205 | -0.42         | 0.54889 |
| STM2359         | STM2359 | putative amino acid transporter                       | 1.46          | 0.16264 | 0.38          | 0.34917 | 0.48          | 0.63664 |
| STM2360         | STM2360 | putative diaminopimelate decarboxylase                | -0.06         | 0.89647 | -0.32         | 0.53243 | 0.07          | 0.94831 |
| STM2360         | STM2360 | putative diaminopimelate decarboxylase                | 0.59          | 0.46474 | 0.49          | 0.44945 | 0.26          | 0.80174 |
| STM2361         | STM2361 | putative regulatory protein                           | 0.88          | 0.19533 | 0.69          | 0.03074 | 1.88          | 0.01988 |
| STM2361         | STM2361 | putative regulatory protein                           | 0.36          | 0.53160 | 1.04          | 0.00918 | 0.99          | 0.13323 |

**Table S2.** Genome-wide expression of *Salmonella enterica* serovar Typhimurium inside fibroblasts

|                 |         |                                             | Intracellular WT<br>24 h p.i.                                                      |         | Intracellular <i>phoP</i><br>24 h p.i.                                              |         | Extracellular WT<br>stationary phase                                                |         |
|-----------------|---------|---------------------------------------------|------------------------------------------------------------------------------------|---------|-------------------------------------------------------------------------------------|---------|-------------------------------------------------------------------------------------|---------|
|                 |         |                                             | Relative to WT<br>exponential LB                                                   |         | Relative to <i>phoP</i><br>exponential LB                                           |         | Relative to WT<br>exponential LB                                                    |         |
|                 |         |                                             |  |         |  |         |  |         |
| Systematic name | Gene    | Product                                     | log2Ratio (M)                                                                      | p value | log2Ratio (M)                                                                       | p value | log2Ratio (M)                                                                       | p value |
| STM2362         | purF    | amidophosphoribosyltransferase              | -0.96                                                                              | 0.21279 | 0.63                                                                                | 0.06258 | 0.60                                                                                | 0.24800 |
| STM2362         | purF    | amidophosphoribosyltransferase              | 0.19                                                                               | 0.78623 | 1.12                                                                                | 0.00405 | 0.73                                                                                | 0.07198 |
| STM2363         | cvpA    | colicin V production protein                | -1.86                                                                              | 0.08236 | 0.10                                                                                | 0.75781 | -2.27                                                                               | 0.00135 |
| STM2363         | cvpA    | colicin V production protein                | -1.25                                                                              | 0.02573 | -0.01                                                                               | 0.97286 | -2.71                                                                               | 0.01310 |
| STM2364         | dedD    | putative lipoprotein                        | -0.94                                                                              | 0.14152 | -0.69                                                                               | 0.04168 | -0.91                                                                               | 0.02645 |
| STM2364         | dedD    | putative lipoprotein                        | -0.87                                                                              | 0.27113 | -0.01                                                                               | 0.97699 | -1.52                                                                               | 0.02463 |
| STM2365         | folC    | multifunctional folylpolyglutamate synthase | -0.79                                                                              | 0.12856 | 0.35                                                                                | 0.33003 | -1.68                                                                               | 0.01081 |
| STM2365         | folC    | multifunctional folylpolyglutamate synthase | -0.02                                                                              | 0.96829 | 0.30                                                                                | 0.37747 | -0.86                                                                               | 0.06099 |
| STM2366         | accD    | acetyl-CoA carboxylase beta subunit         | -1.19                                                                              | 0.04910 | -1.49                                                                               | 0.00117 | -3.27                                                                               | 0.00037 |
| STM2366         | accD    | acetyl-CoA carboxylase beta subunit         | 0.01                                                                               | 0.98765 | -0.52                                                                               | 0.11404 | -3.27                                                                               | 0.00041 |
| STM2367         | dedA    | hypothetical protein STM2367                | -1.68                                                                              | 0.01196 | -0.34                                                                               | 0.43706 | -1.00                                                                               | 0.01643 |
| STM2367         | dedA    | hypothetical protein STM2367                | -2.03                                                                              | 0.01305 | -1.17                                                                               | 0.00475 | -2.56                                                                               | 0.00361 |
| STM2368         | truA    | tRNA pseudouridine synthase A               | -1.04                                                                              | 0.04403 | -0.34                                                                               | 0.30331 | -1.67                                                                               | 0.00571 |
| STM2368         | truA    | tRNA pseudouridine synthase A               | -0.68                                                                              | 0.19583 | -0.28                                                                               | 0.42919 | -1.79                                                                               | 0.00744 |
| STM2369         | usg     | hypothetical protein STM2369                | -0.81                                                                              | 0.28355 | -0.19                                                                               | 0.69980 | -2.08                                                                               | 0.00687 |
| STM2369         | usg     | hypothetical protein STM2369                | -0.43                                                                              | 0.34391 | -0.22                                                                               | 0.53090 | -2.14                                                                               | 0.00077 |
| STM2370         | pdxB    | erythronate-4-phosphate dehydrogenase       | -3.42                                                                              | 0.00512 | -1.99                                                                               | 0.00166 | -3.46                                                                               | 0.00038 |
| STM2370         | pdxB    | erythronate-4-phosphate dehydrogenase       | -3.34                                                                              | 0.00547 | -2.47                                                                               | 0.00316 | -4.11                                                                               | 0.00006 |
| STM2371         | flk     | flagellar protein                           | -0.70                                                                              | 0.11628 | 0.46                                                                                | 0.38095 | -1.46                                                                               | 0.01198 |
| STM2371         | flk     | flagellar protein                           | 0.28                                                                               | 0.59866 | 0.57                                                                                | 0.14801 | -1.33                                                                               | 0.01306 |
| STM2372         | STM2372 | hypothetical protein STM2372                | -0.85                                                                              | 0.10017 | 0.94                                                                                | 0.01978 | -1.76                                                                               | 0.01468 |
| STM2372         | STM2372 | hypothetical protein STM2372                | -0.21                                                                              | 0.73688 | 1.20                                                                                | 0.00473 | -0.93                                                                               | 0.09755 |
| STM2373         | STM2373 | putative cytoplasmic protein                | -0.41                                                                              | 0.49835 | -0.77                                                                               | 0.09660 | -0.49                                                                               | 0.41176 |
| STM2373         | STM2373 | putative cytoplasmic protein                | 1.11                                                                               | 0.04243 | -0.33                                                                               | 0.44968 | 1.06                                                                                | 0.14151 |
| STM2374         | STM2374 | putative regulatory protein                 | -0.84                                                                              | 0.14512 | -0.35                                                                               | 0.40839 | -0.33                                                                               | 0.64309 |
| STM2374         | STM2374 | putative regulatory protein                 | 0.83                                                                               | 0.17531 | -0.79                                                                               | 0.12605 | 0.13                                                                                | 0.79578 |
| STM2375         | STM2375 | putative cytoplasmic protein                | -0.27                                                                              | 0.62241 | -0.83                                                                               | 0.03399 | -1.30                                                                               | 0.02944 |
| STM2375         | STM2375 | putative cytoplasmic protein                | 0.11                                                                               | 0.80786 | -0.90                                                                               | 0.02204 | -0.02                                                                               | 0.96274 |
| STM2376         | STM2376 | putative periplasmic protein                | -1.02                                                                              | 0.12841 | -0.81                                                                               | 0.15969 | -0.84                                                                               | 0.09594 |
| STM2376         | STM2376 | putative periplasmic protein                | 0.38                                                                               | 0.62210 | -0.92                                                                               | 0.02062 | -1.42                                                                               | 0.01320 |
| STM2377         | STM2377 | putative inner membrane protein             | -0.93                                                                              | 0.07033 | -0.83                                                                               | 0.03341 | -0.40                                                                               | 0.30862 |
| STM2377         | STM2377 | putative inner membrane protein             | -0.70                                                                              | 0.13970 | -0.95                                                                               | 0.04900 | 0.00                                                                                | 0.99711 |
| STM2378         | fabB    | 3-oxoacyl-(acyl carrier protein) synthase   | -1.62                                                                              | 0.02782 | -0.74                                                                               | 0.07408 | -2.04                                                                               | 0.00202 |
| STM2378         | fabB    | 3-oxoacyl-(acyl carrier protein) synthase   | -1.06                                                                              | 0.04061 | -0.34                                                                               | 0.40495 | -1.76                                                                               | 0.00389 |
| STM2379         | STM2379 | hypothetical protein STM2379                | -0.58                                                                              | 0.28308 | -0.36                                                                               | 0.35289 | -0.18                                                                               | 0.65188 |
| STM2379         | STM2379 | hypothetical protein STM2379                | -1.71                                                                              | 0.11459 | -1.35                                                                               | 0.02518 | -0.76                                                                               | 0.10194 |
| STM2380         | yfcL    | putative cytoplasmic protein                | -0.83                                                                              | 0.10850 | -1.17                                                                               | 0.00532 | -1.48                                                                               | 0.04600 |
| STM2380         | yfcL    | putative cytoplasmic protein                | -1.80                                                                              | 0.02389 | -0.96                                                                               | 0.02354 | -1.44                                                                               | 0.06628 |
| STM2381         | yfcM    | putative cytoplasmic protein                | -0.62                                                                              | 0.29410 | -0.60                                                                               | 0.06608 | -2.02                                                                               | 0.00708 |
| STM2381         | yfcM    | putative cytoplasmic protein                | 0.17                                                                               | 0.68007 | -0.78                                                                               | 0.01798 | -0.40                                                                               | 0.52736 |
| STM2382         | yfcA    | putative permease                           | -1.93                                                                              | 0.01093 | -1.38                                                                               | 0.06223 | -2.34                                                                               | 0.00232 |
| STM2382         | yfcA    | putative permease                           | -0.69                                                                              | 0.43001 | -1.93                                                                               | 0.03236 | -1.51                                                                               | 0.07532 |
| STM2383         | mepA    | penicillin-insensitive murein endopeptidase | 2.04                                                                               | 0.22834 | 1.15                                                                                | 0.00778 | -1.24                                                                               | 0.02255 |
| STM2383         | mepA    | penicillin-insensitive murein endopeptidase | 2.20                                                                               | 0.09382 | 1.32                                                                                | 0.01722 | -1.07                                                                               | 0.04573 |
| STM2384         | aroC    | chorismate synthase                         | -1.25                                                                              | 0.15068 | -0.33                                                                               | 0.52833 | -2.09                                                                               | 0.00165 |
| STM2384         | aroC    | chorismate synthase                         | -0.70                                                                              | 0.11755 | -0.38                                                                               | 0.26709 | -1.71                                                                               | 0.00577 |
| STM2385         | yfcB    | putative methylase                          | -2.09                                                                              | 0.01555 | -0.80                                                                               | 0.07640 | -2.44                                                                               | 0.00034 |
| STM2385         | yfcB    | putative methylase                          | -1.72                                                                              | 0.01326 | -0.88                                                                               | 0.02722 | -2.32                                                                               | 0.00118 |
| STM2386         | yfcN    | hypothetical protein STM2386                | -0.62                                                                              | 0.20762 | 0.47                                                                                | 0.10504 | -0.56                                                                               | 0.16274 |
| STM2386         | yfcN    | hypothetical protein STM2386                | -0.11                                                                              | 0.82987 | 0.92                                                                                | 0.02219 | -0.46                                                                               | 0.24766 |
| STM2387         | sixA    | phosphohistidine phosphatase                | -1.05                                                                              | 0.06350 | 0.65                                                                                | 0.03787 | -0.07                                                                               | 0.87085 |
| STM2387         | sixA    | phosphohistidine phosphatase                | 0.04                                                                               | 0.96889 | 0.97                                                                                | 0.00818 | 0.55                                                                                | 0.24227 |
| STM2388         | yfcX    | putative dehydrogenase                      | -0.60                                                                              | 0.20375 | 2.69                                                                                | 0.00022 | 0.35                                                                                | 0.32940 |
| STM2388         | yfcX    | putative dehydrogenase                      | 1.14                                                                               | 0.07325 | 2.83                                                                                | 0.00006 | 0.98                                                                                | 0.09062 |
| STM2389         | yfcY    | acetyl-CoA acetyltransferase                | 1.64                                                                               | 0.09574 | -0.58                                                                               | 0.28877 | -0.13                                                                               | 0.90096 |
| STM2389         | yfcY    | acetyl-CoA acetyltransferase                | 2.71                                                                               | 0.03664 | -2.15                                                                               | 0.00031 | 0.35                                                                                | 0.72207 |
| STM2390         | yfcZ    | putative cytoplasmic protein                | 0.29                                                                               | 0.73507 | -1.52                                                                               | 0.08869 | -0.80                                                                               | 0.09309 |
| STM2390         | yfcZ    | putative cytoplasmic protein                | -1.41                                                                              | 0.11037 | -0.19                                                                               | 0.53594 | -0.55                                                                               | 0.37957 |
| STM2391         | fadL    | outer membrane-bound fatty acid transporter | -2.09                                                                              | 0.00971 | -0.97                                                                               | 0.01237 | -0.99                                                                               | 0.03055 |
| STM2391         | fadL    | outer membrane-bound fatty acid transporter | -0.60                                                                              | 0.39998 | -0.69                                                                               | 0.03437 | 1.24                                                                                | 0.01979 |
| STM2392         | vacJ    | lipoprotein precursor                       | -0.89                                                                              | 0.34544 | -0.61                                                                               | 0.13673 | -0.91                                                                               | 0.03598 |
| STM2392         | vacJ    | lipoprotein precursor                       | -0.04                                                                              | 0.97265 | -0.80                                                                               | 0.03203 | 0.03                                                                                | 0.94353 |
| STM2393         | yfdC    | hypothetical protein STM2393                | 4.12                                                                               | 0.03086 | -1.43                                                                               | 0.00277 | 2.10                                                                                | 0.07556 |
| STM2393         | yfdC    | hypothetical protein STM2393                | 3.08                                                                               | 0.01235 | -2.07                                                                               | 0.01020 | 2.60                                                                                | 0.00358 |
| STM2394         | argW    | STM2394                                     | -0.02                                                                              | 0.98369 | 0.73                                                                                | 0.11202 | 0.83                                                                                | 0.10090 |
| STM2394         | argW    | STM2394                                     | -0.16                                                                              | 0.85377 | -0.35                                                                               | 0.42291 | -1.88                                                                               | 0.00360 |
| STM2395         | pgtE    | outer membrane protein E precursor          | 0.63                                                                               | 0.21328 | -0.26                                                                               | 0.41048 | -0.25                                                                               | 0.53505 |
| STM2395         | pgtE    | outer membrane protein E precursor          | 1.30                                                                               | 0.07631 | 0.12                                                                                | 0.81857 | 2.10                                                                                | 0.00963 |
| STM2396         | pgtA    | activator                                   | 1.63                                                                               | 0.01855 | 0.70                                                                                | 0.05111 | -0.57                                                                               | 0.19906 |
| STM2396         | pgtA    | activator                                   | 0.84                                                                               | 0.13970 | 0.74                                                                                | 0.06223 | 0.10                                                                                | 0.84280 |

**Table S2.** Genome-wide expression of *Salmonella enterica* serovar Typhimurium inside fibroblasts

Intracellular WT 24 h p.i.      Intracellular *phoP* 24 h p.i.      Extracellular WT stationary phase

Relative to WT exponential LB      Relative to *phoP* exponential LB      Relative to WT exponential LB



| Systematic name | Gene       | Product                                                 | log2Ratio (M) | p value | log2Ratio (M) | p value | log2Ratio (M) | p value |
|-----------------|------------|---------------------------------------------------------|---------------|---------|---------------|---------|---------------|---------|
| STM2397         | pgtB       | phosphoglycerate transport system sensor protein        | -1.66         | 0.02573 | -0.24         | 0.64803 | -1.17         | 0.05230 |
| STM2397         | pgtB       | phosphoglycerate transport system sensor protein        | -0.91         | 0.16626 | -0.29         | 0.56804 | 0.08          | 0.89925 |
| STM2398         | pgtC       | phosphoglycerate transport regulatory protein precursor | 0.61          | 0.27624 | 0.80          | 0.06850 | 0.49          | 0.37262 |
| STM2398         | pgtC       | phosphoglycerate transport regulatory protein precursor | 2.80          | 0.01196 | 0.69          | 0.20228 | 1.71          | 0.01284 |
| STM2399         | pgtP       | transporter                                             | -0.36         | 0.43816 | 0.02          | 0.95121 | -0.26         | 0.70875 |
| STM2399         | pgtP       | transporter                                             | 1.32          | 0.34909 | -0.59         | 0.10087 | -0.37         | 0.63860 |
| STM2400         | STM2400    | putative inner membrane protein                         | -0.10         | 0.88482 | -0.24         | 0.50625 | 1.41          | 0.12985 |
| STM2400         | STM2400    | putative inner membrane protein                         | 1.41          | 0.02096 | 0.13          | 0.81881 | 2.26          | 0.00210 |
| STM2401         | ddg        | lipid A biosynthesis lauroyl acyltransferase            | -0.46         | 0.32563 | -0.13         | 0.79256 | -1.12         | 0.07580 |
| STM2401         | ddg        | lipid A biosynthesis lauroyl acyltransferase            | 0.47          | 0.51183 | -0.08         | 0.77252 | -0.43         | 0.44919 |
| STM2402         | yfdZ       | hypothetical protein STM2402                            | -0.35         | 0.63473 | 0.13          | 0.71776 | -0.49         | 0.17351 |
| STM2402         | yfdZ       | hypothetical protein STM2402                            | 0.05          | 0.93773 | 0.39          | 0.22222 | 0.07          | 0.91503 |
| STM2403         | glk        | glucokinase                                             | -0.82         | 0.47591 | -0.17         | 0.67919 | 1.34          | 0.00890 |
| STM2403         | glk        | glucokinase                                             | -1.04         | 0.04252 | -0.28         | 0.36466 | -0.02         | 0.96589 |
| STM2404         | STM2404    | hypothetical protein STM2404                            | -0.69         | 0.19590 | 0.36          | 0.22845 | 2.11          | 0.00225 |
| STM2404         | STM2404    | hypothetical protein STM2404                            | -0.07         | 0.90161 | 0.77          | 0.13118 | 2.04          | 0.00119 |
| STM2405         | STM2405    | indolepyruvate decarboxylase                            | -0.78         | 0.10885 | 0.71          | 0.05275 | 2.07          | 0.00155 |
| STM2405         | STM2405    | indolepyruvate decarboxylase                            | 0.79          | 0.30002 | 0.81          | 0.03886 | 3.22          | 0.00013 |
| STM2406         | STM2406    | putative oxidoreductase                                 | -0.67         | 0.25983 | 0.36          | 0.33718 | 0.23          | 0.65384 |
| STM2406         | STM2406    | putative oxidoreductase                                 | 0.03          | 0.94505 | 0.31          | 0.48082 | 0.44          | 0.24968 |
| STM2407         | ypeC       | putative periplasmic protein                            | 0.41          | 0.43614 | 1.14          | 0.00525 | 1.43          | 0.01204 |
| STM2407         | ypeC       | putative periplasmic protein                            | 0.22          | 0.74802 | 0.60          | 0.13130 | 1.33          | 0.04071 |
| STM2408         | mntH       | putative manganese transport protein MntH               | 0.10          | 0.93436 | 2.10          | 0.00057 | 0.91          | 0.03650 |
| STM2408         | mntH       | putative manganese transport protein MntH               | 0.49          | 0.54890 | 2.15          | 0.00029 | 1.08          | 0.02914 |
| STM2409         | nupC       | nucleoside transport                                    | -1.90         | 0.02347 | -1.24         | 0.00824 | -0.98         | 0.01727 |
| STM2409         | nupC       | nucleoside transport                                    | -1.39         | 0.02124 | -1.69         | 0.00104 | -0.90         | 0.07488 |
| STM2410         | yfeA       | hypothetical protein STM2410                            | -0.15         | 0.78528 | -0.66         | 0.10976 | -0.90         | 0.04045 |
| STM2410         | yfeA       | hypothetical protein STM2410                            | 0.84          | 0.10993 | -1.29         | 0.01752 | -0.13         | 0.76334 |
| STM2411         | alaX       | STM2412                                                 | 1.60          | 0.02908 | 1.11          | 0.00796 | 1.01          | 0.01646 |
| STM2411         | alaX       | STM2412                                                 | 2.09          | 0.04581 | 1.14          | 0.00288 | 1.41          | 0.00943 |
| STM2412         | alaW       | STM2412                                                 | 1.13          | 0.14440 | 0.85          | 0.05285 | 0.72          | 0.09135 |
| STM2412         | alaW       | STM2412                                                 | 1.96          | 0.02887 | 0.94          | 0.01159 | 1.32          | 0.00847 |
| STM2413         | yfeC       | putative negative regulator                             | -1.15         | 0.09699 | -0.88         | 0.02653 | -0.32         | 0.36407 |
| STM2413         | yfeC       | putative negative regulator                             | -0.29         | 0.62257 | -0.74         | 0.03948 | -0.09         | 0.83162 |
| STM2414         | yfeD       | putative negative regulator                             | 0.08          | 0.95570 | -0.58         | 0.15341 | -0.93         | 0.03373 |
| STM2414         | yfeD       | putative negative regulator                             | 0.56          | 0.39937 | -0.57         | 0.11947 | -0.71         | 0.10453 |
| STM2415         | gltX       | glutamyl-tRNA synthetase                                | -1.17         | 0.04050 | -1.21         | 0.00508 | -0.93         | 0.07016 |
| STM2415         | gltX       | glutamyl-tRNA synthetase                                | -0.34         | 0.55731 | -1.23         | 0.00529 | -0.92         | 0.07668 |
| STM2416         | valU       | STM2416                                                 | -1.09         | 0.08078 | -0.80         | 0.02875 | -1.02         | 0.02717 |
| STM2416         | valU       | STM2416                                                 | -0.91         | 0.22411 | -1.00         | 0.01129 | -1.35         | 0.01330 |
| STM2417         | valX       | STM2417                                                 | -1.22         | 0.16839 | -1.27         | 0.00310 | -1.00         | 0.02548 |
| STM2417         | valX       | STM2417                                                 | -0.88         | 0.31586 | -1.21         | 0.00496 | -0.96         | 0.05939 |
| STM2418         | valY       | STM2418                                                 | 0.39          | 0.63651 | -1.21         | 0.00418 | -0.79         | 0.09479 |
| STM2418         | valY       | STM2418                                                 | 0.33          | 0.60637 | -1.14         | 0.01141 | -0.64         | 0.25940 |
| STM2419         | lysV       | STM2419                                                 | -1.38         | 0.09879 | -1.09         | 0.01270 | 0.60          | 0.21976 |
| STM2419         | lysV       | STM2419                                                 | -0.83         | 0.24636 | -1.01         | 0.01693 | 0.27          | 0.46326 |
| STM2420         | xapR       | XapA transcriptional regulator                          | -0.98         | 0.04842 | -1.49         | 0.00386 | -1.77         | 0.00162 |
| STM2420         | xapR       | XapA transcriptional regulator                          | -2.10         | 0.04811 | -2.09         | 0.00057 | -1.99         | 0.00088 |
| STM2420,1n      | STM2420,1n | hypothetical protein STM2420,1n                         | -1.03         | 0.08599 | -1.22         | 0.03929 | -0.86         | 0.06952 |
| STM2420,1n      | STM2420,1n | hypothetical protein STM2420,1n                         | -0.65         | 0.25322 | -1.48         | 0.00309 | -0.55         | 0.27459 |
| STM2421         | xapB       | xanthosine permease                                     | -1.05         | 0.04930 | -1.22         | 0.00385 | -0.99         | 0.02091 |
| STM2421         | xapB       | xanthosine permease                                     | -1.25         | 0.04123 | -1.81         | 0.00200 | -0.68         | 0.11937 |
| STM2423         | yfeN       | putative outer membrane protein                         | -0.43         | 0.31843 | 0.10          | 0.89357 | 0.02          | 0.96274 |
| STM2423         | yfeN       | putative outer membrane protein                         | -0.87         | 0.34934 | 0.33          | 0.35857 | -0.27         | 0.67592 |
| STM2424         | yfeR       | putative transcriptional regulator                      | 0.92          | 0.16623 | -0.10         | 0.87324 | -0.91         | 0.09155 |
| STM2424         | yfeR       | putative transcriptional regulator                      | 1.84          | 0.14452 | -1.15         | 0.01058 | 0.31          | 0.54797 |
| STM2425         | yfeH       | putative Na <sup>+</sup> -dependent transporter         | -0.87         | 0.17403 | -0.01         | 0.98617 | -0.46         | 0.36137 |
| STM2425         | yfeH       | putative Na <sup>+</sup> -dependent transporter         | -0.65         | 0.30731 | -0.11         | 0.72335 | -0.05         | 0.94027 |
| STM2426         | STM2426    | putative cytoplasmic protein                            | -0.89         | 0.09758 | 0.16          | 0.83257 | -0.94         | 0.04315 |
| STM2426         | STM2426    | putative cytoplasmic protein                            | -0.53         | 0.62724 | -0.94         | 0.01436 | -3.31         | 0.00297 |
| STM2427         | lig        | DNA ligase                                              | -1.51         | 0.02479 | -0.28         | 0.35472 | -0.85         | 0.20130 |
| STM2427         | lig        | DNA ligase                                              | -1.52         | 0.02039 | -0.50         | 0.15953 | -1.62         | 0.00470 |
| STM2428         | zipA       | cell division protein ZipA                              | -0.88         | 0.06375 | -0.28         | 0.35520 | -0.96         | 0.07349 |
| STM2428         | zipA       | cell division protein ZipA                              | -0.49         | 0.27829 | -0.28         | 0.40583 | -0.40         | 0.46879 |
| STM2429         | cysZ       | putative sulfate transport protein CysZ                 | -1.57         | 0.01850 | -0.03         | 0.94882 | -1.43         | 0.00349 |
| STM2429         | cysZ       | putative sulfate transport protein CysZ                 | -1.10         | 0.05264 | -0.30         | 0.36784 | -1.28         | 0.02627 |
| STM2430         | cysK       | O-acetylserine sulfhydrylase A                          | -1.90         | 0.01102 | 0.80          | 0.02654 | -1.51         | 0.00466 |
| STM2430         | cysK       | O-acetylserine sulfhydrylase A                          | -0.90         | 0.06385 | 1.03          | 0.00549 | -0.95         | 0.04348 |
| STM2431         | ptsH       | phosphohistidinoprotein-hexose phosphotransferase       | -3.58         | 0.01196 | -0.17         | 0.68107 | -1.18         | 0.00723 |
| STM2431         | ptsH       | phosphohistidinoprotein-hexose phosphotransferase       | -1.74         | 0.01622 | -0.05         | 0.90712 | -0.38         | 0.34387 |

**Table S2.** Genome-wide expression of *Salmonella enterica* serovar Typhimurium inside fibroblasts

|                 |           |                                                  | Intracellular WT<br>24 h p.i.                                                      |         | Intracellular <i>phoP</i><br>24 h p.i.                                              |         | Extracellular WT<br>stationary phase                                                |         |
|-----------------|-----------|--------------------------------------------------|------------------------------------------------------------------------------------|---------|-------------------------------------------------------------------------------------|---------|-------------------------------------------------------------------------------------|---------|
|                 |           |                                                  | Relative to WT<br>exponential LB                                                   |         | Relative to <i>phoP</i><br>exponential LB                                           |         | Relative to WT<br>exponential LB                                                    |         |
|                 |           |                                                  |  |         |  |         |  |         |
| Systematic name | Gene      | Product                                          | log2Ratio (M)                                                                      | p value | log2Ratio (M)                                                                       | p value | log2Ratio (M)                                                                       | p value |
| STM2432         | ptsI      | PEP-protein phosphotransferase                   | -2.90                                                                              | 0.02163 | 0.26                                                                                | 0.42253 | 0.16                                                                                | 0.69801 |
| STM2432         | ptsI      | PEP-protein phosphotransferase                   | -2.12                                                                              | 0.01982 | 0.15                                                                                | 0.68292 | 0.51                                                                                | 0.19949 |
| STM2433         | crr       | glucose-specific PTS system enzyme IIA component | -2.15                                                                              | 0.02009 | -0.37                                                                               | 0.32299 | 0.25                                                                                | 0.46740 |
| STM2433         | crr       | glucose-specific PTS system enzyme IIA component | -1.74                                                                              | 0.03993 | -0.23                                                                               | 0.53525 | 0.67                                                                                | 0.10219 |
| STM2434         | STM2434   | putative cytoplasmic protein                     | -1.06                                                                              | 0.05492 | -0.14                                                                               | 0.75004 | -0.11                                                                               | 0.85489 |
| STM2434         | STM2434   | putative cytoplasmic protein                     | 0.58                                                                               | 0.49779 | -0.25                                                                               | 0.46854 | -0.49                                                                               | 0.28709 |
| STM2435         | pdxK      | pyridoxine kinase                                | -0.05                                                                              | 0.91992 | -0.13                                                                               | 0.69823 | -0.67                                                                               | 0.11243 |
| STM2435         | pdxK      | pyridoxine kinase                                | 0.28                                                                               | 0.50156 | -0.20                                                                               | 0.51646 | -0.25                                                                               | 0.49674 |
| STM2436         | ptsJ      | putative regulatory protein                      | 0.60                                                                               | 0.64036 | -2.74                                                                               | 0.00024 | -0.50                                                                               | 0.50389 |
| STM2436         | ptsJ      | putative regulatory protein                      | 0.17                                                                               | 0.91415 | -3.45                                                                               | 0.00006 | -0.68                                                                               | 0.44312 |
| STM2437         | yfeJ      | glutamine amidotransferase                       | -0.64                                                                              | 0.21801 | 0.08                                                                                | 0.82763 | -1.22                                                                               | 0.03347 |
| STM2437         | yfeJ      | glutamine amidotransferase                       | 1.13                                                                               | 0.05101 | -0.01                                                                               | 0.97744 | 0.20                                                                                | 0.61246 |
| STM2438         | yfeK      | putative periplasmic protein                     | -0.52                                                                              | 0.25933 | 1.00                                                                                | 0.57443 | -0.68                                                                               | 0.35595 |
| STM2438         | yfeK      | putative periplasmic protein                     | -1.20                                                                              | 0.08683 | -0.52                                                                               | 0.09079 | -0.06                                                                               | 0.90050 |
| STM2439         | yfeL      | putative membrane carboxypeptidase               | -1.08                                                                              | 0.13864 | 0.24                                                                                | 0.49627 | -0.52                                                                               | 0.40439 |
| STM2439         | yfeL      | putative membrane carboxypeptidase               | -0.32                                                                              | 0.61544 | 0.11                                                                                | 0.73559 | 0.12                                                                                | 0.80435 |
| STM2440         | cysM      | cysteine synthase B                              | -1.49                                                                              | 0.01787 | -0.82                                                                               | 0.04882 | -1.64                                                                               | 0.01690 |
| STM2440         | cysM      | cysteine synthase B                              | -0.21                                                                              | 0.73458 | -0.94                                                                               | 0.03937 | -1.14                                                                               | 0.03985 |
| STM2441         | cysA      | sulfate permease A protein                       | -0.05                                                                              | 0.93891 | -0.59                                                                               | 0.16682 | -1.30                                                                               | 0.03550 |
| STM2441         | cysA      | sulfate permease A protein                       | 1.13                                                                               | 0.07468 | 0.30                                                                                | 0.36909 | 0.04                                                                                | 0.94267 |
| STM2442         | cysW      | thiosulfate permease W protein                   | 1.04                                                                               | 0.12356 | 0.92                                                                                | 0.01844 | 1.92                                                                                | 0.00122 |
| STM2442         | cysW      | thiosulfate permease W protein                   | 2.92                                                                               | 0.00547 | 0.48                                                                                | 0.34195 | 2.91                                                                                | 0.00017 |
| STM2443         | cysU      | thiosulfate transport protein                    | -0.84                                                                              | 0.14420 | -0.03                                                                               | 0.94302 | -1.70                                                                               | 0.04497 |
| STM2443         | cysU      | thiosulfate transport protein                    | 2.01                                                                               | 0.01040 | 0.20                                                                                | 0.59312 | 0.19                                                                                | 0.80766 |
| STM2444         | cysP      | thiosulfate transport protein                    | -0.36                                                                              | 0.63817 | -0.56                                                                               | 0.12647 | -2.41                                                                               | 0.00371 |
| STM2444         | cysP      | thiosulfate transport protein                    | 1.05                                                                               | 0.28221 | -0.98                                                                               | 0.01057 | -1.50                                                                               | 0.00591 |
| STM2445         | ucpA      | short chain dehydrogenase                        | -0.83                                                                              | 0.43370 | -0.52                                                                               | 0.17677 | -0.58                                                                               | 0.17829 |
| STM2445         | ucpA      | short chain dehydrogenase                        | -0.34                                                                              | 0.65904 | -0.41                                                                               | 0.34046 | 0.27                                                                                | 0.43956 |
| STM2446         | STM2446   | putative iron-dependent peroxidase               | -1.10                                                                              | 0.04296 | -0.16                                                                               | 0.67206 | -1.26                                                                               | 0.01049 |
| STM2446         | STM2446   | putative iron-dependent peroxidase               | 1.19                                                                               | 0.41194 | -0.16                                                                               | 0.71091 | -0.65                                                                               | 0.09859 |
| STM2447         | STM2447   | putative outer membrane lipoprotein              | -1.16                                                                              | 0.03954 | -0.07                                                                               | 0.82184 | 0.23                                                                                | 0.53652 |
| STM2447         | STM2447   | putative outer membrane lipoprotein              | 0.33                                                                               | 0.55541 | 0.24                                                                                | 0.43948 | -0.62                                                                               | 0.25370 |
| STM2448         | yfeZ      | putative inner membrane protein                  | -0.39                                                                              | 0.64567 | 0.25                                                                                | 0.49455 | -1.16                                                                               | 0.07524 |
| STM2448         | yfeZ      | putative inner membrane protein                  | 0.90                                                                               | 0.33717 | 0.24                                                                                | 0.48164 | 0.25                                                                                | 0.54480 |
| STM2449,S       | STM2449,S | putative acetyltransferase                       | -0.56                                                                              | 0.24241 | -0.01                                                                               | 0.98824 | -1.22                                                                               | 0.01095 |
| STM2449,S       | STM2449,S | putative acetyltransferase                       | -0.15                                                                              | 0.82613 | 0.41                                                                                | 0.55616 | 0.13                                                                                | 0.75522 |
| STM2450         | amiA      | N-acetylmuramoyl-L-alanine amidase I             | -0.43                                                                              | 0.34366 | -1.33                                                                               | 0.00288 | -2.12                                                                               | 0.00188 |
| STM2450         | amiA      | N-acetylmuramoyl-L-alanine amidase I             | -1.89                                                                              | 0.05899 | -1.54                                                                               | 0.00477 | -1.99                                                                               | 0.00244 |
| STM2451         | hemF      | coproporphyrinogen III oxidase                   | -1.10                                                                              | 0.17096 | -1.05                                                                               | 0.10307 | -3.06                                                                               | 0.00014 |
| STM2451         | hemF      | coproporphyrinogen III oxidase                   | 0.90                                                                               | 0.47183 | -1.35                                                                               | 0.00432 | -1.46                                                                               | 0.00824 |
| STM2452         | STM2452   | putative inner membrane protein                  | 0.02                                                                               | 0.97285 | -1.97                                                                               | 0.00199 | -0.68                                                                               | 0.27344 |
| STM2452         | STM2452   | putative inner membrane protein                  | -2.01                                                                              | 0.03471 | -1.96                                                                               | 0.00546 | -1.34                                                                               | 0.03953 |
| STM2453         | STM2453   | putative cytoplasmic protein                     | 0.88                                                                               | 0.41577 | -0.10                                                                               | 0.73911 | -0.29                                                                               | 0.57253 |
| STM2453         | STM2453   | putative cytoplasmic protein                     | 2.29                                                                               | 0.01595 | -0.25                                                                               | 0.39595 | 1.83                                                                                | 0.01244 |
| STM2454         | eutR      | putative ethanolamine operon regulator           | -1.92                                                                              | 0.01900 | -0.49                                                                               | 0.31269 | -0.22                                                                               | 0.71783 |
| STM2454         | eutR      | putative ethanolamine operon regulator           | -0.08                                                                              | 0.91550 | -0.70                                                                               | 0.15418 | 0.01                                                                                | 0.98252 |
| STM2455         | eutK      | putative carboxysome structural protein          | 0.46                                                                               | 0.28978 | 1.15                                                                                | 0.00761 | 0.08                                                                                | 0.91610 |
| STM2455         | eutK      | putative carboxysome structural protein          | 0.68                                                                               | 0.18821 | 1.98                                                                                | 0.04342 | 1.05                                                                                | 0.13575 |
| STM2456         | eutL      | putative carboxysome structural protein          | -0.18                                                                              | 0.74341 | 0.45                                                                                | 0.17897 | 0.25                                                                                | 0.59552 |
| STM2456         | eutL      | putative carboxysome structural protein          | 1.38                                                                               | 0.14267 | 0.09                                                                                | 0.82712 | 0.93                                                                                | 0.06300 |
| STM2457         | eutC      | ethanolamine ammonia-lyase small subunit         | 0.14                                                                               | 0.82994 | 1.02                                                                                | 0.05871 | 1.43                                                                                | 0.03347 |
| STM2457         | eutC      | ethanolamine ammonia-lyase small subunit         | 1.79                                                                               | 0.10321 | 0.95                                                                                | 0.01264 | 1.37                                                                                | 0.02677 |
| STM2458         | eutB      | ethanolamine ammonia-lyase heavy chain           | 1.23                                                                               | 0.15459 | 0.21                                                                                | 0.66614 | 0.38                                                                                | 0.61421 |
| STM2458         | eutB      | ethanolamine ammonia-lyase heavy chain           | 2.69                                                                               | 0.02617 | -0.70                                                                               | 0.06120 | 1.47                                                                                | 0.01675 |
| STM2459         | eutA      | ethanolamine utilization protein                 | 0.59                                                                               | 0.21912 | 0.23                                                                                | 0.59365 | -0.25                                                                               | 0.64334 |
| STM2459         | eutA      | ethanolamine utilization protein                 | 0.60                                                                               | 0.23857 | -0.04                                                                               | 0.92483 | 0.01                                                                                | 0.97990 |
| STM2460         | eutH      | putative transport protein                       | 0.99                                                                               | 0.07851 | 0.94                                                                                | 0.03743 | 0.49                                                                                | 0.30914 |
| STM2460         | eutH      | putative transport protein                       | 2.53                                                                               | 0.05095 | -0.76                                                                               | 0.04238 | 0.62                                                                                | 0.22406 |
| STM2461         | eutG      | putative transport protein                       | 3.30                                                                               | 0.04188 | -0.54                                                                               | 0.35344 | 0.68                                                                                | 0.49698 |
| STM2461         | eutG      | putative transport protein                       | 3.18                                                                               | 0.00541 | 0.04                                                                                | 0.90639 | 1.43                                                                                | 0.14505 |
| STM2462         | eutJ      | ethanolamine utilization protein                 | 0.40                                                                               | 0.44416 | -0.69                                                                               | 0.07806 | 0.06                                                                                | 0.92963 |
| STM2462         | eutJ      | ethanolamine utilization protein                 | 1.56                                                                               | 0.02540 | -0.35                                                                               | 0.26924 | 0.19                                                                                | 0.71862 |
| STM2463         | eutE      | putative aldehyde oxidoreductase                 | -0.16                                                                              | 0.79281 | 0.24                                                                                | 0.59214 | -1.27                                                                               | 0.00634 |
| STM2463         | eutE      | putative aldehyde oxidoreductase                 | 1.01                                                                               | 0.05175 | 0.00                                                                                | 0.99206 | -0.07                                                                               | 0.87683 |
| STM2464         | eutN      | putative detox protein                           | 0.64                                                                               | 0.38106 | -0.06                                                                               | 0.90526 | -0.22                                                                               | 0.68811 |
| STM2464         | eutN      | putative detox protein                           | 1.49                                                                               | 0.02735 | -0.84                                                                               | 0.01679 | -0.12                                                                               | 0.83048 |
| STM2465         | eutM      | putative detox protein                           | 0.89                                                                               | 0.07395 | 0.06                                                                                | 0.90672 | 0.08                                                                                | 0.89732 |
| STM2465         | eutM      | putative detox protein                           | 1.27                                                                               | 0.06091 | -0.34                                                                               | 0.29483 | -0.12                                                                               | 0.90653 |
| STM2466         | eutD      | phosphate acetyltransferase                      | -0.16                                                                              | 0.71638 | -0.15                                                                               | 0.79193 | 0.20                                                                                | 0.68707 |
| STM2466         | eutD      | phosphate acetyltransferase                      | 0.88                                                                               | 0.18742 | -0.85                                                                               | 0.02397 | 2.21                                                                                | 0.00757 |

|                 |         |                                                 | Intracellular WT<br>24 h p.i.                                                      |         | Intracellular <i>phoP</i><br>24 h p.i.                                              |         | Extracellular WT<br>stationary phase                                                |         |
|-----------------|---------|-------------------------------------------------|------------------------------------------------------------------------------------|---------|-------------------------------------------------------------------------------------|---------|-------------------------------------------------------------------------------------|---------|
|                 |         |                                                 | Relative to WT<br>exponential LB                                                   |         | Relative to <i>phoP</i><br>exponential LB                                           |         | Relative to WT<br>exponential LB                                                    |         |
|                 |         |                                                 |  |         |  |         |  |         |
| Systematic name | Gene    | Product                                         | log2Ratio (M)                                                                      | p value | log2Ratio (M)                                                                       | p value | log2Ratio (M)                                                                       | p value |
| STM2467         | eutT    | putative cobalamin adenosyltransferase          | -1.19                                                                              | 0.09242 | -0.94                                                                               | 0.00734 | -0.24                                                                               | 0.71589 |
| STM2467         | eutT    | putative cobalamin adenosyltransferase          | -0.17                                                                              | 0.71355 | -0.61                                                                               | 0.16443 | -0.16                                                                               | 0.71797 |
| STM2468         | eutQ    | putative ethanolamine utilization protein       | -0.37                                                                              | 0.48685 | -0.77                                                                               | 0.09566 | 0.63                                                                                | 0.24602 |
| STM2468         | eutQ    | putative ethanolamine utilization protein       | -0.31                                                                              | 0.73224 | -1.16                                                                               | 0.01184 | -0.38                                                                               | 0.33123 |
| STM2469         | eutP    | putative ethanolamine utilization protein       | 0.55                                                                               | 0.24318 | 0.91                                                                                | 0.01975 | 1.13                                                                                | 0.11837 |
| STM2469         | eutP    | putative ethanolamine utilization protein       | 2.03                                                                               | 0.01835 | 0.87                                                                                | 0.02602 | 1.30                                                                                | 0.01732 |
| STM2470         | eutS    | putative carboxysome structural protein         | 4.11                                                                               | 0.00595 | -0.12                                                                               | 0.78961 | -0.51                                                                               | 0.43994 |
| STM2470         | eutS    | putative carboxysome structural protein         | 4.65                                                                               | 0.00512 | -0.75                                                                               | 0.08481 | 1.56                                                                                | 0.05942 |
| STM2472         | maeB    | phosphate acetyltransferase                     | -0.63                                                                              | 0.31460 | -0.40                                                                               | 0.30992 | -1.50                                                                               | 0.01769 |
| STM2472         | maeB    | phosphate acetyltransferase                     | 0.24                                                                               | 0.69773 | -0.23                                                                               | 0.52124 | 0.00                                                                                | 0.99947 |
| STM2473         | talA    | transaldolase                                   | -0.91                                                                              | 0.14205 | 2.54                                                                                | 0.00014 | 2.92                                                                                | 0.00040 |
| STM2473         | talA    | transaldolase                                   | 0.14                                                                               | 0.78825 | 2.74                                                                                | 0.00022 | 3.97                                                                                | 0.00009 |
| STM2474         | tktB    | transketolase                                   | -0.43                                                                              | 0.46384 | 1.00                                                                                | 0.00806 | 1.32                                                                                | 0.01739 |
| STM2474         | tktB    | transketolase                                   | -0.09                                                                              | 0.89334 | 0.89                                                                                | 0.08179 | 1.65                                                                                | 0.01029 |
| STM2475         | STM2475 | putative cytoplasmic protein                    | 5.91                                                                               | 0.00512 | 1.66                                                                                | 0.09200 | 5.30                                                                                | 0.00034 |
| STM2475         | STM2475 | putative cytoplasmic protein                    | 7.10                                                                               | 0.00512 | 1.63                                                                                | 0.02306 | 4.63                                                                                | 0.00638 |
| STM2476         | ypfG    | putative periplasmic protein                    | 0.70                                                                               | 0.12740 | -0.32                                                                               | 0.50325 | -0.12                                                                               | 0.73003 |
| STM2476         | ypfG    | putative periplasmic protein                    | 1.14                                                                               | 0.25396 | -0.19                                                                               | 0.62704 | 1.31                                                                                | 0.02610 |
| STM2477         | yffH    | putative pyrophosphohydrolase                   | -0.57                                                                              | 0.24162 | -0.26                                                                               | 0.41028 | -0.38                                                                               | 0.31066 |
| STM2477         | yffH    | putative pyrophosphohydrolase                   | 0.04                                                                               | 0.92982 | 0.44                                                                                | 0.40748 | -0.22                                                                               | 0.86413 |
| STM2478         | STM2478 | hypothetical protein STM2478                    | 0.32                                                                               | 0.66672 | 1.26                                                                                | 0.02811 | 0.98                                                                                | 0.05212 |
| STM2478         | STM2478 | hypothetical protein STM2478                    | 1.35                                                                               | 0.04568 | 1.75                                                                                | 0.00374 | 1.66                                                                                | 0.01460 |
| STM2479         | aegA    | putative oxidoreductase                         | -0.03                                                                              | 0.97445 | 0.44                                                                                | 0.44562 | 0.53                                                                                | 0.55238 |
| STM2479         | aegA    | putative oxidoreductase                         | 1.61                                                                               | 0.03896 | 0.27                                                                                | 0.60479 | 0.23                                                                                | 0.61223 |
| STM2480         | narQ    | sensory histidine kinase                        | 0.72                                                                               | 0.12155 | -0.13                                                                               | 0.65558 | 0.01                                                                                | 0.98379 |
| STM2480         | narQ    | sensory histidine kinase                        | 2.60                                                                               | 0.19438 | -0.71                                                                               | 0.04969 | 1.18                                                                                | 0.04097 |
| STM2481         | acrD    | aminoglycoside/multidrug efflux pump            | 0.86                                                                               | 0.47388 | 0.44                                                                                | 0.41151 | 2.83                                                                                | 0.07952 |
| STM2481         | acrD    | aminoglycoside/multidrug efflux pump            | 0.64                                                                               | 0.25320 | -0.58                                                                               | 0.11383 | 0.26                                                                                | 0.58333 |
| STM2482         | yffB    | putative glutaredoxin                           | -1.90                                                                              | 0.00994 | -1.30                                                                               | 0.00272 | -2.13                                                                               | 0.00040 |
| STM2482         | yffB    | putative glutaredoxin                           | -1.82                                                                              | 0.01405 | -1.52                                                                               | 0.00133 | -2.48                                                                               | 0.00146 |
| STM2483         | dapE    | succinyl-diaminopimelate desuccinylase          | -2.44                                                                              | 0.00650 | -0.17                                                                               | 0.55660 | 0.26                                                                                | 0.48911 |
| STM2483         | dapE    | succinyl-diaminopimelate desuccinylase          | -1.22                                                                              | 0.03925 | -0.10                                                                               | 0.74912 | 0.49                                                                                | 0.20093 |
| STM2484         | STM2484 | putative inner membrane protein                 | -0.63                                                                              | 0.28111 | 0.49                                                                                | 0.12500 | 1.06                                                                                | 0.02482 |
| STM2484         | STM2484 | putative inner membrane protein                 | 0.18                                                                               | 0.69529 | 0.02                                                                                | 0.95751 | 1.56                                                                                | 0.00391 |
| STM2485         | ypfI    | putative acetyltransferase                      | -1.63                                                                              | 0.04376 | -1.45                                                                               | 0.17728 | -0.17                                                                               | 0.76199 |
| STM2485         | ypfI    | putative acetyltransferase                      | -0.10                                                                              | 0.90467 | -0.35                                                                               | 0.41172 | -0.23                                                                               | 0.60435 |
| STM2486         | STM2486 | putative inner membrane protein                 | -0.47                                                                              | 0.37554 | 0.59                                                                                | 0.06206 | 0.57                                                                                | 0.13235 |
| STM2486         | STM2486 | putative inner membrane protein                 | -0.08                                                                              | 0.91393 | 1.05                                                                                | 0.00843 | 1.38                                                                                | 0.01386 |
| STM2487         | purC    | phosphoribosylaminoimidazole-succinocarboxamide | -1.23                                                                              | 0.03188 | 0.73                                                                                | 0.03596 | -1.87                                                                               | 0.00508 |
| STM2487         | purC    | phosphoribosylaminoimidazole-succinocarboxamide | -1.26                                                                              | 0.05496 | 0.97                                                                                | 0.00845 | -0.84                                                                               | 0.15732 |
| STM2488         | nlpB    | lipoprotein                                     | -1.50                                                                              | 0.01652 | -0.78                                                                               | 0.02349 | -3.20                                                                               | 0.00041 |
| STM2488         | nlpB    | lipoprotein                                     | -0.30                                                                              | 0.57122 | 0.06                                                                                | 0.86466 | -2.56                                                                               | 0.00024 |
| STM2489         | dapA    | dihydrodipicolinate synthase                    | -2.91                                                                              | 0.01235 | -1.66                                                                               | 0.00373 | -3.02                                                                               | 0.00026 |
| STM2489         | dapA    | dihydrodipicolinate synthase                    | -3.32                                                                              | 0.00796 | -0.59                                                                               | 0.13865 | -4.40                                                                               | 0.00002 |
| STM2490         | gcvR    | gcv operon transcriptional repressor            | -1.74                                                                              | 0.03887 | 0.09                                                                                | 0.76403 | -1.92                                                                               | 0.00461 |
| STM2490         | gcvR    | gcv operon transcriptional repressor            | -0.92                                                                              | 0.08960 | 0.12                                                                                | 0.70110 | -1.43                                                                               | 0.05661 |
| STM2491         | bcp     | bacterioferritin comigratory protein            | -1.08                                                                              | 0.10468 | -0.12                                                                               | 0.69250 | -0.62                                                                               | 0.09186 |
| STM2491         | bcp     | bacterioferritin comigratory protein            | 0.51                                                                               | 0.45136 | -0.12                                                                               | 0.71909 | -0.47                                                                               | 0.23768 |
| STM2492         | STM2492 | putative glycerate kinase                       | 0.14                                                                               | 0.87292 | 0.42                                                                                | 0.17924 | -1.71                                                                               | 0.00676 |
| STM2492         | STM2492 | putative glycerate kinase                       | -0.47                                                                              | 0.29898 | 0.32                                                                                | 0.33962 | -0.06                                                                               | 0.90111 |
| STM2493         | perM    | putative permease                               | -1.56                                                                              | 0.02456 | -0.32                                                                               | 0.29487 | -1.05                                                                               | 0.04176 |
| STM2493         | perM    | putative permease                               | -0.13                                                                              | 0.83855 | -0.60                                                                               | 0.07526 | -1.04                                                                               | 0.07865 |
| STM2494         | STM2494 | hypothetical protein STM2494                    | -0.27                                                                              | 0.79064 | 1.27                                                                                | 0.00952 | -0.39                                                                               | 0.30625 |
| STM2494         | STM2494 | hypothetical protein STM2494                    | -0.54                                                                              | 0.29945 | 1.02                                                                                | 0.02951 | 0.35                                                                                | 0.52152 |
| STM2495         | yfgD    | putative arsenate reductase                     | -0.95                                                                              | 0.14828 | 0.25                                                                                | 0.40572 | 0.49                                                                                | 0.46857 |
| STM2495         | yfgD    | putative arsenate reductase                     | -0.50                                                                              | 0.33719 | 0.72                                                                                | 0.09717 | -0.68                                                                               | 0.10682 |
| STM2496         | yfgE    | DNA replication initiation factor               | -1.22                                                                              | 0.04685 | 0.82                                                                                | 0.03760 | -1.16                                                                               | 0.02414 |
| STM2496         | yfgE    | DNA replication initiation factor               | 0.08                                                                               | 0.85963 | 0.60                                                                                | 0.10464 | 0.16                                                                                | 0.68201 |
| STM2497         | uraA    | uracil transport protein                        | 0.27                                                                               | 0.69215 | -1.23                                                                               | 0.00270 | -1.03                                                                               | 0.01607 |
| STM2497         | uraA    | uracil transport protein                        | 1.27                                                                               | 0.07740 | -0.50                                                                               | 0.09013 | -0.29                                                                               | 0.54611 |
| STM2498         | upp     | uracil phosphoribosyltransferase                | -0.41                                                                              | 0.39332 | -0.47                                                                               | 0.29303 | 1.15                                                                                | 0.39419 |
| STM2498         | upp     | uracil phosphoribosyltransferase                | -0.76                                                                              | 0.11941 | -1.00                                                                               | 0.02257 | -2.85                                                                               | 0.04051 |
| STM2499,S       | purM    | phosphoribosylaminoimidazole synthetase         | 0.57                                                                               | 0.29842 | 1.73                                                                                | 0.00102 | 1.03                                                                                | 0.08629 |
| STM2499,S       | purM    | phosphoribosylaminoimidazole synthetase         | 1.14                                                                               | 0.07421 | 1.65                                                                                | 0.00332 | 1.89                                                                                | 0.00232 |
| STM2500         | purN    | phosphoribosylglycinamide formyltransferase     | -0.90                                                                              | 0.07984 | 0.06                                                                                | 0.89351 | 1.46                                                                                | 0.02326 |
| STM2500         | purN    | phosphoribosylglycinamide formyltransferase     | -0.27                                                                              | 0.71247 | -0.18                                                                               | 0.55733 | 0.77                                                                                | 0.22267 |
| STM2501         | ppk     | polyphosphate kinase                            | -2.45                                                                              | 0.00747 | -0.25                                                                               | 0.46196 | -1.63                                                                               | 0.00337 |
| STM2501         | ppk     | polyphosphate kinase                            | -1.18                                                                              | 0.03006 | -0.69                                                                               | 0.07732 | -0.72                                                                               | 0.12142 |
| STM2502         | ppx     | exopolyphosphatase                              | -0.74                                                                              | 0.38726 | -0.53                                                                               | 0.17879 | -1.53                                                                               | 0.02705 |
| STM2502         | ppx     | exopolyphosphatase                              | 0.19                                                                               | 0.76815 | -0.55                                                                               | 0.13579 | -0.73                                                                               | 0.13691 |

**Table S2.** Genome-wide expression of *Salmonella enterica* serovar Typhimurium inside fibroblasts

|                 |         |                                                      | Intracellular WT<br>24 h p.i.                                                      |         | Intracellular <i>phoP</i><br>24 h p.i.                                              |         | Extracellular WT<br>stationary phase                                                |         |
|-----------------|---------|------------------------------------------------------|------------------------------------------------------------------------------------|---------|-------------------------------------------------------------------------------------|---------|-------------------------------------------------------------------------------------|---------|
|                 |         |                                                      | Relative to WT<br>exponential LB                                                   |         | Relative to <i>phoP</i><br>exponential LB                                           |         | Relative to WT<br>exponential LB                                                    |         |
|                 |         |                                                      |  |         |  |         |  |         |
| Systematic name | Gene    | Product                                              | log2Ratio (M)                                                                      | p value | log2Ratio (M)                                                                       | p value | log2Ratio (M)                                                                       | p value |
| STM2503         | STM2503 | putative diguanylate cyclase                         | -0.36                                                                              | 0.72496 | 0.58                                                                                | 0.07414 | -0.35                                                                               | 0.49120 |
| STM2503         | STM2503 | putative diguanylate cyclase                         | -0.01                                                                              | 0.97962 | -0.84                                                                               | 0.03602 | -0.99                                                                               | 0.03262 |
| STM2506         | STM2506 | putative inner membrane protein                      | 0.58                                                                               | 0.51063 | 2.08                                                                                | 0.00029 | 1.10                                                                                | 0.01844 |
| STM2506         | STM2506 | putative inner membrane protein                      | 1.36                                                                               | 0.07367 | 1.82                                                                                | 0.00161 | 2.22                                                                                | 0.00251 |
| STM2509         | STM2509 | putative transposase                                 | 1.07                                                                               | 0.13872 | 0.49                                                                                | 0.21170 | 0.52                                                                                | 0.57169 |
| STM2509         | STM2509 | putative transposase                                 | 2.50                                                                               | 0.02108 | 0.47                                                                                | 0.23868 | 1.77                                                                                | 0.01211 |
| STM2510         | guaA    | bifunctional GMP synthase/glutamine amidotransferase | -1.76                                                                              | 0.01114 | -0.58                                                                               | 0.06449 | -1.74                                                                               | 0.01114 |
| STM2510         | guaA    | bifunctional GMP synthase/glutamine amidotransferase | -0.67                                                                              | 0.39345 | -0.39                                                                               | 0.23227 | -1.22                                                                               | 0.00943 |
| STM2511         | guaB    | inositol-5-monophosphate dehydrogenase               | -1.63                                                                              | 0.01696 | 0.05                                                                                | 0.89875 | -1.22                                                                               | 0.01311 |
| STM2511         | guaB    | inositol-5-monophosphate dehydrogenase               | -1.52                                                                              | 0.02828 | 0.47                                                                                | 0.13604 | -1.65                                                                               | 0.00221 |
| STM2512         | xseA    | exodeoxyribonuclease VII large subunit               | -0.33                                                                              | 0.47370 | -0.80                                                                               | 0.01975 | -0.10                                                                               | 0.81935 |
| STM2512         | xseA    | exodeoxyribonuclease VII large subunit               | 0.63                                                                               | 0.15497 | -0.96                                                                               | 0.04036 | 0.49                                                                                | 0.28341 |
| STM2513         | shdA    | AIDA autotransporter-like protein                    | -0.31                                                                              | 0.58029 | -0.52                                                                               | 0.19050 | 0.83                                                                                | 0.08941 |
| STM2513         | shdA    | AIDA autotransporter-like protein                    | 0.55                                                                               | 0.24390 | -0.45                                                                               | 0.25086 | -0.89                                                                               | 0.06126 |
| STM2514         | ratB    | putative outer membrane protein                      | 0.66                                                                               | 0.28745 | -1.13                                                                               | 0.11782 | 2.84                                                                                | 0.01746 |
| STM2514         | ratB    | putative outer membrane protein                      | 1.99                                                                               | 0.02703 | 0.29                                                                                | 0.34258 | 1.20                                                                                | 0.16994 |
| STM2515         | ratA    | putative outer membrane protein                      | -0.22                                                                              | 0.63301 | 0.22                                                                                | 0.47604 | -0.23                                                                               | 0.66056 |
| STM2515         | ratA    | putative outer membrane protein                      | 0.21                                                                               | 0.66516 | 0.28                                                                                | 0.53260 | 0.00                                                                                | 0.99711 |
| STM2516         | sinI    | putative outer membrane protein                      | 0.42                                                                               | 0.34927 | -1.30                                                                               | 0.00487 | 0.22                                                                                | 0.56831 |
| STM2516         | sinI    | putative outer membrane protein                      | 0.99                                                                               | 0.30603 | -0.91                                                                               | 0.04293 | 0.51                                                                                | 0.18300 |
| STM2517         | sinH    | intimin-like protein                                 | 1.09                                                                               | 0.17565 | 1.29                                                                                | 0.06645 | 1.39                                                                                | 0.04187 |
| STM2517         | sinH    | intimin-like protein                                 | 0.95                                                                               | 0.34855 | 0.08                                                                                | 0.90455 | 1.54                                                                                | 0.10951 |
| STM2518         | yfgJ    | putative cytoplasmic protein                         | -1.01                                                                              | 0.05615 | -0.57                                                                               | 0.07126 | -0.99                                                                               | 0.01519 |
| STM2518         | yfgJ    | putative cytoplasmic protein                         | 0.06                                                                               | 0.93581 | -0.92                                                                               | 0.01495 | -0.78                                                                               | 0.10007 |
| STM2519         | engA    | GTP-binding protein EngA                             | 0.36                                                                               | 0.42438 | -0.03                                                                               | 0.94293 | -0.22                                                                               | 0.68707 |
| STM2519         | engA    | GTP-binding protein EngA                             | 0.95                                                                               | 0.12321 | -0.39                                                                               | 0.17490 | 0.61                                                                                | 0.17963 |
| STM2520         | yfgL    | putative serine/threonine protein kinase             | -2.42                                                                              | 0.00969 | -1.83                                                                               | 0.00067 | -2.13                                                                               | 0.00034 |
| STM2520         | yfgL    | putative serine/threonine protein kinase             | -2.40                                                                              | 0.03832 | -1.70                                                                               | 0.00097 | -2.27                                                                               | 0.00051 |
| STM2521         | yfgM    | putative inner membrane protein                      | -2.80                                                                              | 0.04120 | -0.83                                                                               | 0.02826 | -2.69                                                                               | 0.00037 |
| STM2521         | yfgM    | putative inner membrane protein                      | -1.55                                                                              | 0.28755 | -1.10                                                                               | 0.00515 | -2.08                                                                               | 0.00200 |
| STM2522         | hisS    | histidyl-tRNA synthetase                             | -2.23                                                                              | 0.00689 | -1.12                                                                               | 0.00511 | -3.10                                                                               | 0.00020 |
| STM2522         | hisS    | histidyl-tRNA synthetase                             | -1.04                                                                              | 0.04373 | -0.69                                                                               | 0.03240 | -2.72                                                                               | 0.00014 |
| STM2523         | gcpE    | 4-hydroxy-3-methylbut-2-en-1-yl diphosphate synthase | -3.06                                                                              | 0.00778 | -1.41                                                                               | 0.00437 | -0.98                                                                               | 0.01917 |
| STM2523         | gcpE    | 4-hydroxy-3-methylbut-2-en-1-yl diphosphate synthase | -2.14                                                                              | 0.00735 | -0.93                                                                               | 0.01539 | -0.68                                                                               | 0.10506 |
| STM2524         | yfgA    | hypothetical protein STM2524                         | -1.52                                                                              | 0.03239 | 0.01                                                                                | 0.97856 | -1.01                                                                               | 0.02234 |
| STM2524         | yfgA    | hypothetical protein STM2524                         | -0.44                                                                              | 0.55171 | -0.16                                                                               | 0.60724 | -0.31                                                                               | 0.50391 |
| STM2525         | yfgB    | putative FeS redox enzyme                            | -2.51                                                                              | 0.00673 | -1.66                                                                               | 0.00080 | -3.22                                                                               | 0.00023 |
| STM2525         | yfgB    | putative FeS redox enzyme                            | -2.54                                                                              | 0.03017 | -1.36                                                                               | 0.00234 | -3.07                                                                               | 0.00022 |
| STM2526         | ndk     | nucleoside diphosphate kinase                        | -2.91                                                                              | 0.00546 | -2.64                                                                               | 0.00005 | -3.46                                                                               | 0.00006 |
| STM2526         | ndk     | nucleoside diphosphate kinase                        | -2.00                                                                              | 0.01041 | -2.65                                                                               | 0.00013 | -3.03                                                                               | 0.00020 |
| STM2527         | STM2527 | putative polyferredoxin                              | -0.98                                                                              | 0.35982 | -1.50                                                                               | 0.00240 | -1.40                                                                               | 0.00693 |
| STM2527         | STM2527 | putative polyferredoxin                              | 0.01                                                                               | 0.97845 | -1.20                                                                               | 0.00536 | 1.82                                                                                | 0.00137 |
| STM2528         | STM2528 | putative dimethylsulfoxide reductase                 | 0.33                                                                               | 0.69128 | -0.46                                                                               | 0.58775 | -1.13                                                                               | 0.14266 |
| STM2528         | STM2528 | putative dimethylsulfoxide reductase                 | -0.67                                                                              | 0.39843 | -2.12                                                                               | 0.00805 | -0.84                                                                               | 0.24363 |
| STM2529         | STM2529 | putative anaerobic dimethylsulfoxide reductase       | -0.10                                                                              | 0.87872 | -0.38                                                                               | 0.43148 | 0.16                                                                                | 0.81005 |
| STM2529         | STM2529 | putative anaerobic dimethylsulfoxide reductase       | -1.24                                                                              | 0.20710 | -0.69                                                                               | 0.04103 | -0.41                                                                               | 0.52582 |
| STM2530         | STM2530 | putative anaerobic dimethylsulfoxide reductase       | 0.28                                                                               | 0.57176 | -0.61                                                                               | 0.12291 | 0.97                                                                                | 0.05617 |
| STM2530         | STM2530 | putative anaerobic dimethylsulfoxide reductase       | 1.35                                                                               | 0.04050 | -0.76                                                                               | 0.19376 | 1.64                                                                                | 0.00802 |
| STM2531         | pbpC    | penicillin-binding protein 1c                        | 0.12                                                                               | 0.78453 | -0.42                                                                               | 0.28109 | -0.80                                                                               | 0.17991 |
| STM2531         | pbpC    | penicillin-binding protein 1c                        | 1.11                                                                               | 0.19353 | -0.56                                                                               | 0.19402 | 0.25                                                                                | 0.57743 |
| STM2532         | STM2532 | putative inner membrane lipoprotein                  | -1.16                                                                              | 0.03541 | -0.80                                                                               | 0.05063 | -0.98                                                                               | 0.13645 |
| STM2532         | STM2532 | putative inner membrane lipoprotein                  | -0.19                                                                              | 0.83479 | -0.22                                                                               | 0.47540 | -0.54                                                                               | 0.15742 |
| STM2533         | sseA    | putative sulfurtransferase                           | -1.29                                                                              | 0.13871 | -0.63                                                                               | 0.05193 | -0.10                                                                               | 0.83741 |
| STM2533         | sseA    | putative sulfurtransferase                           | -0.30                                                                              | 0.51664 | -0.47                                                                               | 0.24399 | 0.50                                                                                | 0.22319 |
| STM2534         | STM2534 | putative cytoplasmic protein                         | -0.81                                                                              | 0.16678 | 0.14                                                                                | 0.73817 | 0.48                                                                                | 0.26256 |
| STM2534         | STM2534 | putative cytoplasmic protein                         | 0.03                                                                               | 0.95570 | -0.28                                                                               | 0.37640 | 0.93                                                                                | 0.02525 |
| STM2535         | sseB    | enhanced serine sensitivity protein                  | -1.15                                                                              | 0.04451 | -1.27                                                                               | 0.06349 | -1.09                                                                               | 0.01689 |
| STM2535         | sseB    | enhanced serine sensitivity protein                  | -0.66                                                                              | 0.14600 | -1.28                                                                               | 0.00306 | -2.19                                                                               | 0.00031 |
| STM2536         | pepB    | aminopeptidase B                                     | -1.87                                                                              | 0.01027 | -1.82                                                                               | 0.00165 | -3.40                                                                               | 0.00006 |
| STM2536         | pepB    | aminopeptidase B                                     | -1.81                                                                              | 0.01536 | -2.21                                                                               | 0.00017 | -2.90                                                                               | 0.00025 |
| STM2537         | yfhJ    | hypothetical protein STM2537                         | -3.52                                                                              | 0.00991 | -1.99                                                                               | 0.00049 | -2.27                                                                               | 0.00040 |
| STM2537         | yfhJ    | hypothetical protein STM2537                         | -4.72                                                                              | 0.00541 | -1.89                                                                               | 0.00036 | -3.65                                                                               | 0.00034 |
| STM2538         | fdx     | electron carrier protein                             | -3.00                                                                              | 0.00840 | -1.82                                                                               | 0.00155 | -4.22                                                                               | 0.00006 |
| STM2538         | fdx     | electron carrier protein                             | -1.86                                                                              | 0.01024 | -1.75                                                                               | 0.00165 | -3.60                                                                               | 0.00005 |
| STM2539         | hscA    | chaperone protein HscA                               | -3.00                                                                              | 0.00546 | -1.67                                                                               | 0.00141 | -3.78                                                                               | 0.00006 |
| STM2539         | hscA    | chaperone protein HscA                               | -1.99                                                                              | 0.01201 | -1.44                                                                               | 0.00130 | -2.74                                                                               | 0.00186 |
| STM2540         | hscB    | co-chaperone HscB                                    | -2.82                                                                              | 0.02284 | -0.96                                                                               | 0.01230 | -2.34                                                                               | 0.00114 |
| STM2540         | hscB    | co-chaperone HscB                                    | -0.98                                                                              | 0.05112 | -0.59                                                                               | 0.10650 | -2.54                                                                               | 0.00036 |
| STM2541         | iscA    | iron-sulfur cluster assembly protein                 | -1.70                                                                              | 0.03623 | -0.13                                                                               | 0.71894 | -1.24                                                                               | 0.01002 |
| STM2541         | iscA    | iron-sulfur cluster assembly protein                 | -1.08                                                                              | 0.04528 | -0.41                                                                               | 0.32082 | -0.86                                                                               | 0.04274 |



**Table S2.** Genome-wide expression of *Salmonella enterica* serovar Typhimurium inside fibroblasts

Intracellular WT 24 h p.i.      Intracellular *phoP* 24 h p.i.      Extracellular WT stationary phase

Relative to WT exponential LB      Relative to *phoP* exponential LB      Relative to WT exponential LB



| Systematic name | Gene      | Product                                  | log2Ratio (M) | p value | log2Ratio (M) | p value | log2Ratio (M) | p value |
|-----------------|-----------|------------------------------------------|---------------|---------|---------------|---------|---------------|---------|
| STM2578         | pdxJ      | pyridoxal phosphate biosynthetic protein | -2.42         | 0.02148 | -0.31         | 0.44794 | -2.00         | 0.00852 |
| STM2578         | pdxJ      | pyridoxal phosphate biosynthetic protein | -1.49         | 0.02018 | -1.18         | 0.00355 | -2.29         | 0.00027 |
| STM2579         | recO      | DNA repair protein RecO                  | -0.33         | 0.41886 | -0.64         | 0.04072 | -1.10         | 0.22921 |
| STM2579         | recO      | DNA repair protein RecO                  | -0.36         | 0.49654 | -1.34         | 0.00409 | -1.30         | 0.08620 |
| STM2580         | era       | GTP-binding protein Era                  | -1.58         | 0.01479 | -1.62         | 0.00190 | -2.62         | 0.00063 |
| STM2580         | era       | GTP-binding protein Era                  | -1.90         | 0.03368 | -1.61         | 0.00092 | -1.97         | 0.00059 |
| STM2581         | rncS      | ribonuclease III                         | -2.51         | 0.00613 | -0.94         | 0.01653 | -2.55         | 0.00038 |
| STM2581         | rncS      | ribonuclease III                         | -1.92         | 0.02003 | -1.19         | 0.01329 | -2.14         | 0.00195 |
| STM2582         | lepB      | signal peptidase I                       | -1.90         | 0.01885 | -0.89         | 0.02521 | -1.47         | 0.01492 |
| STM2582         | lepB      | signal peptidase I                       | -0.54         | 0.20699 | -0.40         | 0.15583 | -1.05         | 0.06827 |
| STM2583         | lepA      | GTP-binding protein LepA                 | -2.29         | 0.00796 | -1.30         | 0.00374 | -2.44         | 0.00069 |
| STM2583         | lepA      | GTP-binding protein LepA                 | -1.36         | 0.02967 | -1.00         | 0.00651 | -2.54         | 0.00032 |
| STM2584         | gogB      | leucine-rich repeat protein              | 0.64          | 0.31928 | 1.33          | 0.00359 | 1.44          | 0.00309 |
| STM2584         | gogB      | leucine-rich repeat protein              | 1.72          | 0.02039 | 0.96          | 0.02537 | 0.96          | 0.03649 |
| STM2586         | STM2586   | phage tail assembly-like protein         | 2.23          | 0.05145 | 1.95          | 0.00829 | 0.20          | 0.82188 |
| STM2586         | STM2586   | phage tail assembly-like protein         | 3.39          | 0.00595 | 1.82          | 0.00087 | 2.96          | 0.00592 |
| STM2587         | STM2587   | phage tail assembly-like protein         | 0.42          | 0.46047 | 1.77          | 0.00258 | 0.59          | 0.33243 |
| STM2587         | STM2587   | phage tail assembly-like protein         | 2.50          | 0.02089 | 1.20          | 0.02635 | 1.42          | 0.00447 |
| STM2588         | STM2588   | tail fiber-like protein                  | 1.43          | 0.18229 | 1.29          | 0.00652 | 0.86          | 0.15469 |
| STM2588         | STM2588   | tail fiber-like protein                  | 2.30          | 0.02878 | 1.29          | 0.00293 | 0.93          | 0.08891 |
| STM2589         | STM2589   | host specificity protein J-like          | 1.20          | 0.17191 | 0.94          | 0.14574 | 1.50          | 0.01378 |
| STM2589         | STM2589   | host specificity protein J-like          | 2.22          | 0.05238 | 0.73          | 0.08544 | 0.59          | 0.19773 |
| STM2590         | STM2590   | tail assembly protein I-like             | 1.05          | 0.27646 | -0.21         | 0.62948 | 1.17          | 0.34975 |
| STM2590         | STM2590   | tail assembly protein I-like             | 2.10          | 0.18507 | -0.84         | 0.38761 | 1.49          | 0.06451 |
| STM2591         | STM2591   | tail assembly protein K-like             | 1.23          | 0.14497 | 0.67          | 0.06143 | 0.42          | 0.31208 |
| STM2591         | STM2591   | tail assembly protein K-like             | 1.83          | 0.01382 | 0.51          | 0.15313 | 0.08          | 0.93658 |
| STM2592         | STM2592   | phage tail component L-like protein      | 0.12          | 0.87793 | 0.60          | 0.12202 | -0.47         | 0.50695 |
| STM2592         | STM2592   | phage tail component L-like protein      | 4.16          | 0.01842 | 0.44          | 0.17032 | 0.92          | 0.06605 |
| STM2593         | STM2593   | phage tail component M-like protein      | 0.02          | 0.97408 | 0.42          | 0.20044 | -0.62         | 0.13198 |
| STM2593         | STM2593   | phage tail component M-like protein      | 0.58          | 0.26993 | 0.18          | 0.66125 | 0.57          | 0.33837 |
| STM2594         | STM2594   | phage tail component H-like protein      | 0.69          | 0.34584 | 0.73          | 0.11518 | 0.95          | 0.10488 |
| STM2594         | STM2594   | phage tail component H-like protein      | 2.42          | 0.01423 | -0.15         | 0.73817 | 1.24          | 0.04270 |
| STM2595         | STM2595   | minor tail-like protein                  | 1.01          | 0.16242 | 1.56          | 0.01465 | -0.22         | 0.77851 |
| STM2595         | STM2595   | minor tail-like protein                  | 2.14          | 0.01314 | 0.99          | 0.01058 | 0.69          | 0.13942 |
| STM2596         | STM2596   | minor tail-like protein                  | 0.89          | 0.22802 | 1.39          | 0.00389 | 0.90          | 0.18964 |
| STM2596         | STM2596   | minor tail-like protein                  | 0.41          | 0.31152 | 0.00          | 0.99707 | 0.96          | 0.01762 |
| STM2597         | STM2597   | major tail-like protein                  | 1.00          | 0.23605 | -0.93         | 0.01460 | -0.68         | 0.10072 |
| STM2597         | STM2597   | major tail-like protein                  | 0.47          | 0.29638 | -1.07         | 0.10752 | -0.40         | 0.37381 |
| STM2598         | STM2598   | hypothetical protein STM2598             | 0.70          | 0.34702 | 1.16          | 0.00975 | 1.46          | 0.03772 |
| STM2598         | STM2598   | hypothetical protein STM2598             | 2.14          | 0.08303 | 0.74          | 0.06234 | 1.87          | 0.00567 |
| STM2599         | STM2599   | putative virulence protein               | -0.87         | 0.14274 | 0.75          | 0.09869 | -0.03         | 0.96589 |
| STM2599         | STM2599   | putative virulence protein               | -1.62         | 0.03920 | 0.30          | 0.35037 | -0.91         | 0.04587 |
| STM2600         | STM2600   | minor tail protein Z-like                | -0.54         | 0.53128 | -0.04         | 0.91349 | 0.10          | 0.89079 |
| STM2600         | STM2600   | minor tail protein Z-like                | 0.41          | 0.42422 | 0.30          | 0.56539 | -0.11         | 0.85769 |
| STM2601         | STM2601   | minor capsid protein FII                 | 1.77          | 0.02396 | 0.45          | 0.26914 | 0.79          | 0.24473 |
| STM2601         | STM2601   | minor capsid protein FII                 | 2.06          | 0.01568 | 0.25          | 0.52124 | 1.09          | 0.05094 |
| STM2602         | STM2602   | DNA packaging-like protein               | 0.61          | 0.56348 | 1.05          | 0.00700 | -0.29         | 0.48246 |
| STM2602         | STM2602   | DNA packaging-like protein               | 1.74          | 0.01630 | 1.08          | 0.02060 | 0.75          | 0.17580 |
| STM2603         | STM2603   | phage head-like protein                  | -0.34         | 0.43996 | 0.75          | 0.13601 | -0.42         | 0.38173 |
| STM2603         | STM2603   | phage head-like protein                  | 0.95          | 0.51039 | 1.14          | 0.00892 | 0.19          | 0.77927 |
| STM2604         | STM2604   | phage head-like protein                  | -0.03         | 0.96157 | 1.53          | 0.00226 | 0.31          | 0.44849 |
| STM2604         | STM2604   | phage head-like protein                  | 0.06          | 0.94683 | 0.82          | 0.05642 | -1.43         | 0.05116 |
| STM2605         | STM2605   | head-tail preconnector-like protein      | 0.84          | 0.14371 | 2.18          | 0.00026 | 0.30          | 0.46673 |
| STM2605         | STM2605   | head-tail preconnector-like protein      | 1.22          | 0.10724 | 1.56          | 0.00656 | 2.25          | 0.00087 |
| STM2606         | STM2606   | head-tail preconnector-like protein      | 0.98          | 0.30717 | -0.65         | 0.14203 | 1.20          | 0.13343 |
| STM2606         | STM2606   | head-tail preconnector-like protein      | 0.90          | 0.50061 | -2.33         | 0.00607 | 1.05          | 0.14177 |
| STM2607         | STM2607   | head-to-tail joining-like protein        | -0.13         | 0.89804 | 0.09          | 0.82450 | -0.44         | 0.59391 |
| STM2607         | STM2607   | head-to-tail joining-like protein        | 1.52          | 0.09924 | 0.45          | 0.25531 | 0.50          | 0.40318 |
| STM2608         | STM2608   | terminase-like large protein             | 0.54          | 0.61014 | 0.50          | 0.21846 | 1.16          | 0.02509 |
| STM2608         | STM2608   | terminase-like large protein             | 2.86          | 0.00643 | 1.42          | 0.12184 | 2.12          | 0.00984 |
| STM2609         | STM2609   | DNA packaging-like protein               | 0.11          | 0.91113 | 2.05          | 0.00038 | 1.55          | 0.06734 |
| STM2609         | STM2609   | DNA packaging-like protein               | 0.52          | 0.66105 | 0.06          | 0.89875 | 1.84          | 0.02143 |
| STM2610         | STM2610   | hypothetical protein STM2610             | -0.14         | 0.83532 | 0.57          | 0.22949 | 0.38          | 0.50325 |
| STM2610         | STM2610   | hypothetical protein STM2610             | 0.53          | 0.32861 | 1.08          | 0.03892 | 0.79          | 0.14272 |
| STM2611,S       | STM2611,S | endopeptidase-like protein               | 3.65          | 0.03449 | 1.24          | 0.00414 | 2.25          | 0.00114 |
| STM2611,S       | STM2611,S | endopeptidase-like protein               | 3.14          | 0.00627 | 1.18          | 0.16031 | 2.30          | 0.00176 |
| STM2612         | STM2612   | morphogenesis-like protein               | 0.86          | 0.32833 | -0.23         | 0.58609 | -0.26         | 0.71077 |
| STM2612         | STM2612   | morphogenesis-like protein               | 1.68          | 0.14152 | -0.24         | 0.60608 | 0.30          | 0.40607 |
| STM2613         | STM2613   | hypothetical protein STM2613             | 0.11          | 0.89200 | 0.01          | 0.98167 | -0.60         | 0.22406 |
| STM2613         | STM2613   | hypothetical protein STM2613             | 0.79          | 0.30638 | -0.17         | 0.55592 | 0.20          | 0.66682 |

**Table S2.** Genome-wide expression of *Salmonella enterica* serovar Typhimurium inside fibroblasts

Intracellular WT 24 h p.i.      Intracellular *phoP* 24 h p.i.      Extracellular WT stationary phase

Relative to WT exponential LB      Relative to *phoP* exponential LB      Relative to WT exponential LB



| Systematic name | Gene    | Product                                  | log2Ratio (M) | p value | log2Ratio (M) | p value | log2Ratio (M) | p value |
|-----------------|---------|------------------------------------------|---------------|---------|---------------|---------|---------------|---------|
| STM2613         | STM2613 | hypothetical protein STM2613             | 1.80          | 0.03078 | -0.23         | 0.46396 | 0.70          | 0.14632 |
| STM2613         | STM2613 | hypothetical protein STM2613             | 1.24          | 0.15446 | -0.49         | 0.11526 | 0.77          | 0.16121 |
| STM2614         | STM2614 | hypothetical protein STM2614             | 0.53          | 0.66548 | 1.25          | 0.03728 | -0.84         | 0.24346 |
| STM2614         | STM2614 | hypothetical protein STM2614             | 1.00          | 0.11000 | 0.63          | 0.04220 | 1.24          | 0.03857 |
| STM2614         | STM2614 | hypothetical protein STM2614             | 0.61          | 0.68672 | -0.06         | 0.87241 | -1.15         | 0.23556 |
| STM2614         | STM2614 | hypothetical protein STM2614             | 3.78          | 0.01420 | 0.59          | 0.23752 | 2.49          | 0.00073 |
| STM2615         | STM2615 | STM2615                                  | -0.40         | 0.42140 | 2.64          | 0.00011 | 2.23          | 0.01499 |
| STM2615         | STM2615 | STM2615                                  | 0.40          | 0.57062 | 2.28          | 0.00023 | 2.18          | 0.00212 |
| STM2616         | STM2616 | antirepressor-like protein               | -0.13         | 0.88509 | -0.67         | 0.16297 | -1.17         | 0.01079 |
| STM2616         | STM2616 | antirepressor-like protein               | 1.02          | 0.28256 | -0.86         | 0.15681 | -0.36         | 0.38971 |
| STM2617         | STM2617 | antiterminator-like protein              | -0.69         | 0.20679 | 1.13          | 0.12212 | -0.63         | 0.41531 |
| STM2617         | STM2617 | antiterminator-like protein              | 0.03          | 0.96659 | -0.59         | 0.10561 | -0.66         | 0.13527 |
| STM2619         | STM2619 | hypothetical protein STM2619             | 0.67          | 0.43614 | 1.06          | 0.00562 | 0.26          | 0.80322 |
| STM2619         | STM2619 | hypothetical protein STM2619             | 2.28          | 0.10160 | -0.01         | 0.98084 | 0.16          | 0.70401 |
| STM2621         | STM2621 | hypothetical protein STM2621             | 2.42          | 0.00635 | 2.29          | 0.00036 | 1.40          | 0.22405 |
| STM2621         | STM2621 | hypothetical protein STM2621             | 0.12          | 0.87745 | 1.72          | 0.00082 | -0.42         | 0.36115 |
| STM2621         | STM2621 | hypothetical protein STM2621             | 2.64          | 0.01001 | 2.44          | 0.00080 | 3.44          | 0.01643 |
| STM2621         | STM2621 | hypothetical protein STM2621             | 0.48          | 0.56654 | 1.36          | 0.00139 | 0.26          | 0.65504 |
| STM2622         | STM2622 | hypothetical protein STM2622             | -0.92         | 0.22242 | 0.78          | 0.07640 | -0.37         | 0.37087 |
| STM2622         | STM2622 | hypothetical protein STM2622             | 0.05          | 0.92780 | 0.73          | 0.08547 | 0.16          | 0.69524 |
| STM2623         | STM2623 | hypothetical protein STM2623             | -0.34         | 0.50125 | 0.73          | 0.06010 | -1.21         | 0.10899 |
| STM2623         | STM2623 | hypothetical protein STM2623             | 0.51          | 0.41383 | 0.67          | 0.06534 | -0.97         | 0.19045 |
| STM2624         | STM2624 | hypothetical protein STM2624             | 1.96          | 0.03795 | -0.69         | 0.10365 | 1.08          | 0.10756 |
| STM2624         | STM2624 | hypothetical protein STM2624             | 2.84          | 0.01578 | -1.48         | 0.04696 | 1.94          | 0.00966 |
| STM2625         | STM2625 | DNA replication protein DnaC             | -1.17         | 0.03453 | -0.29         | 0.45852 | -0.38         | 0.58267 |
| STM2625         | STM2625 | DNA replication protein DnaC             | -0.13         | 0.82161 | -0.46         | 0.36235 | -0.17         | 0.76659 |
| STM2626         | STM2626 | replication protein 15-like              | -0.62         | 0.37311 | 1.51          | 0.40978 | -1.63         | 0.08531 |
| STM2626         | STM2626 | replication protein 15-like              | 0.97          | 0.17974 | -0.92         | 0.03074 | 0.87          | 0.07856 |
| STM2630         | STM2630 | hypothetical protein STM2630             | -0.83         | 0.19262 | 0.46          | 0.34768 | 0.06          | 0.93217 |
| STM2630         | STM2630 | hypothetical protein STM2630             | 0.48          | 0.69773 | 0.59          | 0.08468 | -0.03         | 0.96708 |
| STM2632         | STM2632 | exodeoxyribonuclease VIII-like protein   | 2.70          | 0.02992 | 0.27          | 0.60665 | 1.57          | 0.01388 |
| STM2632         | STM2632 | exodeoxyribonuclease VIII-like protein   | 3.82          | 0.00660 | -0.43         | 0.30394 | 4.12          | 0.00207 |
| STM2634         | STM2634 | putative cytoplasmic protein             | 0.69          | 0.57536 | 0.94          | 0.04908 | 0.93          | 0.33123 |
| STM2634         | STM2634 | putative cytoplasmic protein             | 0.59          | 0.23635 | 0.54          | 0.31042 | 0.67          | 0.18886 |
| STM2634         | STM2634 | putative cytoplasmic protein             | 1.42          | 0.25049 | 1.05          | 0.00581 | 1.54          | 0.01911 |
| STM2634         | STM2634 | putative cytoplasmic protein             | 1.97          | 0.11370 | 0.59          | 0.34467 | 0.39          | 0.39379 |
| STM2634         | STM2634 | putative cytoplasmic protein             | 2.37          | 0.01374 | 0.74          | 0.03037 | 0.80          | 0.06134 |
| STM2634         | STM2634 | putative cytoplasmic protein             | 2.46          | 0.08918 | 1.33          | 0.00430 | 1.32          | 0.03398 |
| STM2636         | STM2636 | integrase-like protein                   | -0.93         | 0.18512 | 0.25          | 0.53784 | -0.10         | 0.91769 |
| STM2636         | STM2636 | integrase-like protein                   | 0.66          | 0.16953 | -0.81         | 0.02896 | 0.17          | 0.88181 |
| STM2637         | rseC    | sigma E regulator                        | -0.18         | 0.67685 | -0.85         | 0.04386 | -0.26         | 0.64451 |
| STM2637         | rseC    | sigma E regulator                        | -0.27         | 0.61495 | -0.49         | 0.30553 | -1.77         | 0.35137 |
| STM2638         | rseB    | periplasmic negative regulator of sigmaE | -1.46         | 0.09211 | 0.11          | 0.77002 | -0.56         | 0.16069 |
| STM2638         | rseB    | periplasmic negative regulator of sigmaE | -0.30         | 0.46543 | 0.13          | 0.65395 | -0.71         | 0.06788 |
| STM2639         | rseA    | anti sigma-E factor                      | 0.90          | 0.20017 | 0.67          | 0.08292 | 0.78          | 0.17790 |
| STM2639         | rseA    | anti sigma-E factor                      | 0.72          | 0.35081 | 0.15          | 0.69717 | 1.14          | 0.01904 |
| STM2640         | rpoE    | RNA polymerase sigma-70 factor           | 0.12          | 0.93334 | 2.15          | 0.00043 | 2.42          | 0.00058 |
| STM2640         | rpoE    | RNA polymerase sigma-70 factor           | 1.52          | 0.02235 | 1.97          | 0.00038 | 2.67          | 0.00015 |
| STM2641         | nadB    | L-aspartate oxidase                      | 1.44          | 0.01823 | -0.14         | 0.72900 | -0.83         | 0.03800 |
| STM2641         | nadB    | L-aspartate oxidase                      | 1.02          | 0.38027 | -0.15         | 0.70841 | -0.42         | 0.47910 |
| STM2642         | yfiC    | putative transferase                     | 0.69          | 0.22926 | -0.44         | 0.14475 | -1.08         | 0.22774 |
| STM2642         | yfiC    | putative transferase                     | 0.95          | 0.14813 | -0.70         | 0.05069 | 0.16          | 0.80762 |
| STM2643         | srnB    | ATP-dependent RNA helicase               | 0.36          | 0.68802 | -0.07         | 0.86476 | 0.84          | 0.26162 |
| STM2643         | srnB    | ATP-dependent RNA helicase               | 1.58          | 0.02838 | -0.57         | 0.10328 | 2.00          | 0.00587 |
| STM2644         | yfiE    | putative transcriptional regulator       | -2.02         | 0.00957 | -0.67         | 0.05432 | -0.88         | 0.10101 |
| STM2644         | yfiE    | putative transcriptional regulator       | -0.87         | 0.10643 | -0.80         | 0.02411 | -1.13         | 0.04068 |
| STM2645         | yfiK    | putative transport protein               | -0.01         | 0.98547 | -0.42         | 0.16899 | -0.25         | 0.52152 |
| STM2645         | yfiK    | putative transport protein               | 0.63          | 0.30358 | -0.36         | 0.31206 | 0.45          | 0.36411 |
| STM2646         | yfiD    | putative formate acetyltransferase       | 0.07          | 0.95350 | -0.34         | 0.78792 | -1.18         | 0.01495 |
| STM2646         | yfiD    | putative formate acetyltransferase       | 1.16          | 0.26666 | -0.20         | 0.87217 | -0.02         | 0.96438 |
| STM2647         | ung     | uracil-DNA glycosylase                   | -1.00         | 0.05366 | -0.79         | 0.07621 | -0.66         | 0.16812 |
| STM2647         | ung     | uracil-DNA glycosylase                   | 0.82          | 0.16476 | -0.44         | 0.16350 | 0.13          | 0.73165 |
| STM2648         | yfiF    | putative tRNA/rRNA methyltransferase     | -1.69         | 0.01703 | -1.15         | 0.00574 | -1.51         | 0.00764 |
| STM2648         | yfiF    | putative tRNA/rRNA methyltransferase     | -0.62         | 0.25374 | -1.04         | 0.00814 | -0.49         | 0.25102 |
| STM2649         | trxC    | thioredoxin 2                            | -1.64         | 0.01745 | -1.09         | 0.00402 | -0.32         | 0.39526 |
| STM2649         | trxC    | thioredoxin 2                            | -1.49         | 0.01624 | -1.42         | 0.00224 | 0.30          | 0.40137 |
| STM2650         | yfiP    | putative cytoplasmic protein             | -0.98         | 0.11839 | -0.42         | 0.13980 | -1.09         | 0.06063 |
| STM2650         | yfiP    | putative cytoplasmic protein             | 0.25          | 0.74145 | -0.55         | 0.10906 | -0.41         | 0.28842 |
| STM2651         | yfiQ    | putative acetyl-CoA synthetase           | -1.79         | 0.01257 | -0.10         | 0.77040 | 0.33          | 0.40927 |
| STM2651         | yfiQ    | putative acetyl-CoA synthetase           | -0.97         | 0.23254 | -0.56         | 0.10282 | 0.69          | 0.09556 |



**Table S2.** Genome-wide expression of *Salmonella enterica* serovar Typhimurium inside fibroblasts

Intracellular WT 24 h p.i.      Intracellular *phoP* 24 h p.i.      Extracellular WT stationary phase

Relative to WT exponential LB      Relative to *phoP* exponential LB      Relative to WT exponential LB



| Systematic name | Gene      | Product                                       | log2Ratio (M) | p value | log2Ratio (M) | p value | log2Ratio (M) | p value |
|-----------------|-----------|-----------------------------------------------|---------------|---------|---------------|---------|---------------|---------|
| STM2691         | STM2691   | putative ABC transporter transmembrane region | -0.15         | 0.82961 | 0.02          | 0.96285 | 1.31          | 0.00579 |
| STM2691         | STM2691   | putative ABC transporter transmembrane region | 0.93          | 0.12760 | 0.20          | 0.45436 | 1.21          | 0.02305 |
| STM2692         | STM2692   | putative HlyD family secretion protein        | -0.63         | 0.25982 | 1.49          | 0.00169 | 2.40          | 0.00072 |
| STM2692         | STM2692   | putative HlyD family secretion protein        | 0.37          | 0.49079 | 2.11          | 0.00022 | 2.95          | 0.00018 |
| STM2695         | STM2695   | late control-like protein                     | -1.12         | 0.03429 | 1.80          | 0.00347 | 2.55          | 0.00018 |
| STM2695         | STM2695   | late control-like protein                     | 1.25          | 0.20103 | 2.00          | 0.00027 | 2.87          | 0.00023 |
| STM2696         | STM2696   | putative phage tail protein                   | -0.99         | 0.12550 | -0.23         | 0.53641 | 0.33          | 0.54270 |
| STM2696         | STM2696   | putative phage tail protein                   | 0.28          | 0.53276 | -0.53         | 0.26860 | 1.20          | 0.01096 |
| STM2697         | STM2697   | phage tail-like protein                       | 0.72          | 0.48739 | 1.56          | 0.00416 | 2.90          | 0.00048 |
| STM2697         | STM2697   | phage tail-like protein                       | 1.24          | 0.53282 | 1.27          | 0.00350 | 2.54          | 0.00024 |
| STM2698         | STM2698   | gpE-like protein                              | 0.78          | 0.22800 | -0.75         | 0.09139 | -0.51         | 0.30444 |
| STM2698         | STM2698   | gpE-like protein                              | 0.15          | 0.75518 | -1.76         | 0.01058 | -0.05         | 0.93157 |
| STM2699         | STM2699   | putative phage tail-like protein              | 0.26          | 0.76828 | -0.52         | 0.32953 | -0.92         | 0.05699 |
| STM2699         | STM2699   | putative phage tail-like protein              | 1.40          | 0.04632 | -0.35         | 0.25687 | 0.29          | 0.54593 |
| STM2700         | STM2700   | phage tail fiber-like protein                 | 0.09          | 0.85646 | 0.15          | 0.73115 | 0.30          | 0.59207 |
| STM2700         | STM2700   | phage tail fiber-like protein                 | 1.61          | 0.02969 | -0.41         | 0.29876 | 0.95          | 0.05388 |
| STM2701         | STM2701   | phage tail sheath-like protein                | -0.17         | 0.70958 | -0.32         | 0.41085 | -0.23         | 0.81483 |
| STM2701         | STM2701   | phage tail sheath-like protein                | 0.46          | 0.48579 | -0.56         | 0.37236 | 0.16          | 0.82747 |
| STM2704         | STM2704   | tail fibre assembly-like protein              | 0.50          | 0.45508 | 0.62          | 0.13265 | 0.14          | 0.84467 |
| STM2704         | STM2704   | tail fibre assembly-like protein              | 1.88          | 0.07498 | 0.58          | 0.08899 | 1.01          | 0.10568 |
| STM2705         | STM2705   | hypothetical protein STM2705                  | 0.10          | 0.87808 | 3.46          | 0.00325 | -0.13         | 0.88243 |
| STM2705         | STM2705   | hypothetical protein STM2705                  | 2.39          | 0.02003 | 2.33          | 0.00032 | -0.33         | 0.67780 |
| STM2707         | STM2707   | phage tail-like protein                       | 2.37          | 0.15840 | 0.13          | 0.84941 | 0.30          | 0.75058 |
| STM2707         | STM2707   | phage tail-like protein                       | 1.38          | 0.14472 | -1.20         | 0.00910 | -1.08         | 0.02330 |
| STM2708         | STM2708   | phage tail-like protein                       | -0.22         | 0.78321 | -1.30         | 0.00536 | 0.02          | 0.97888 |
| STM2708         | STM2708   | phage tail-like protein                       | 1.03          | 0.32638 | -1.58         | 0.00886 | -0.27         | 0.52301 |
| STM2709         | STM2709   | base plate tail-like protein                  | 3.14          | 0.15588 | 0.33          | 0.33822 | 3.30          | 0.00018 |
| STM2709         | STM2709   | base plate tail-like protein                  | 1.38          | 0.46005 | -0.78         | 0.08389 | 1.55          | 0.32312 |
| STM2710         | STM2710   | phage baseplate assembly-like protein         | 1.30          | 0.04857 | 0.29          | 0.37029 | 1.63          | 0.06115 |
| STM2710         | STM2710   | phage baseplate assembly-like protein         | 1.87          | 0.17574 | -1.49         | 0.12242 | 1.56          | 0.08957 |
| STM2711         | STM2711   | phage tail-like protein                       | 0.59          | 0.47345 | -0.68         | 0.14563 | -0.88         | 0.06364 |
| STM2711         | STM2711   | phage tail-like protein                       | 1.64          | 0.09199 | -1.04         | 0.08315 | 0.51          | 0.43018 |
| STM2712         | STM2712   | phage tail-like protein                       | -0.19         | 0.69393 | -0.06         | 0.93057 | 0.07          | 0.90511 |
| STM2712         | STM2712   | phage tail-like protein                       | 0.00          | 0.99561 | -0.79         | 0.22274 | -0.69         | 0.19771 |
| STM2714         | STM2714   | lysis-like protein                            | -0.96         | 0.13861 | -1.51         | 0.00411 | -1.45         | 0.06530 |
| STM2714         | STM2714   | lysis-like protein                            | 0.94          | 0.31215 | -1.72         | 0.00171 | -0.64         | 0.23094 |
| STM2715,S       | STM2715,S | probable prophage lysozyme                    | 1.29          | 0.12760 | -1.53         | 0.00156 | 1.59          | 0.15409 |
| STM2715,S       | STM2715,S | probable prophage lysozyme                    | 2.14          | 0.06060 | -1.90         | 0.00304 | 2.86          | 0.00956 |
| STM2716         | STM2716   | phage-holin-like protein                      | 0.34          | 0.40710 | -1.32         | 0.02099 | -0.97         | 0.02614 |
| STM2716         | STM2716   | phage-holin-like protein                      | 0.81          | 0.13798 | -0.78         | 0.05763 | 0.11          | 0.83652 |
| STM2717         | STM2717   | phage tail-like protein                       | -0.22         | 0.78112 | -0.35         | 0.64645 | 1.39          | 0.04183 |
| STM2717         | STM2717   | phage tail-like protein                       | 0.54          | 0.42147 | -0.90         | 0.01350 | 0.62          | 0.57253 |
| STM2718         | STM2718   | head completion-like protein                  | 0.37          | 0.72539 | -3.77         | 0.00004 | -1.60         | 0.16503 |
| STM2718         | STM2718   | head completion-like protein                  | 0.70          | 0.42564 | -2.92         | 0.00043 | 0.16          | 0.85179 |
| STM2719         | STM2719   | terminase-like protein                        | 0.80          | 0.25208 | 1.16          | 0.01697 | 1.56          | 0.00900 |
| STM2719         | STM2719   | terminase-like protein                        | 1.67          | 0.01638 | -1.20         | 0.02622 | 1.75          | 0.11102 |
| STM2720         | STM2720   | major capsid-like protein                     | 1.41          | 0.21225 | -0.29         | 0.35953 | 0.49          | 0.18455 |
| STM2720         | STM2720   | major capsid-like protein                     | 2.20          | 0.03512 | -1.15         | 0.03228 | 1.46          | 0.01025 |
| STM2721         | STM2721   | capsid scaffold-like protein                  | 0.12          | 0.83262 | -0.87         | 0.03016 | -0.32         | 0.41952 |
| STM2721         | STM2721   | capsid scaffold-like protein                  | 1.50          | 0.06765 | -1.14         | 0.04818 | 1.01          | 0.03898 |
| STM2722         | STM2722   | terminase-like protein                        | 0.03          | 0.96650 | 0.50          | 0.38154 | -0.32         | 0.59456 |
| STM2722         | STM2722   | terminase-like protein                        | 1.19          | 0.17054 | -0.14         | 0.69954 | 0.04          | 0.92666 |
| STM2723         | STM2723   | portal vertex-like protein                    | -0.82         | 0.21144 | -0.24         | 0.63469 | -0.54         | 0.45037 |
| STM2723         | STM2723   | portal vertex-like protein                    | -0.22         | 0.71386 | -0.27         | 0.48517 | 0.22          | 0.90641 |
| STM2727         | STM2727   | hypothetical protein STM2727                  | 1.71          | 0.10377 | -0.45         | 0.22495 | 1.02          | 0.19909 |
| STM2727         | STM2727   | hypothetical protein STM2727                  | 2.15          | 0.00789 | -1.06         | 0.07309 | 1.50          | 0.00988 |
| STM2729         | STM2729   | hypothetical protein STM2729                  | 1.04          | 0.05139 | 0.04          | 0.93535 | 1.04          | 0.19025 |
| STM2729         | STM2729   | hypothetical protein STM2729                  | 4.12          | 0.01426 | -0.25         | 0.61822 | 1.45          | 0.05032 |
| STM2730         | STM2730   | DNA adenine methylase-like protein            | 0.24          | 0.71798 | 0.97          | 0.05959 | 0.97          | 0.18300 |
| STM2730         | STM2730   | DNA adenine methylase-like protein            | 0.42          | 0.57501 | -1.75         | 0.02193 | -0.36         | 0.68786 |
| STM2732         | STM2732   | hypothetical protein STM2732                  | 0.02          | 0.99193 | 0.07          | 0.84293 | -0.70         | 0.33459 |
| STM2732         | STM2732   | hypothetical protein STM2732                  | 2.13          | 0.00753 | -0.48         | 0.19657 | 1.20          | 0.29470 |
| STM2733         | STM2733   | hypothetical protein STM2733                  | 1.08          | 0.05897 | -0.36         | 0.68418 | -0.80         | 0.24527 |
| STM2733         | STM2733   | hypothetical protein STM2733                  | 2.12          | 0.02191 | -0.26         | 0.59197 | 1.92          | 0.00303 |
| STM2735         | STM2735   | hypothetical protein STM2735                  | 2.22          | 0.00814 | 0.06          | 0.89060 | 0.64          | 0.44206 |
| STM2735         | STM2735   | hypothetical protein STM2735                  | 4.05          | 0.00547 | -0.06         | 0.93768 | 2.37          | 0.01121 |
| STM2736         | STM2736   | hypothetical protein STM2736                  | 1.85          | 0.03631 | -0.31         | 0.61286 | 0.35          | 0.40988 |
| STM2736         | STM2736   | hypothetical protein STM2736                  | 0.81          | 0.10154 | -1.21         | 0.00478 | 1.37          | 0.00416 |
| STM2737         | STM2737   | hypothetical protein STM2737                  | -1.07         | 0.05430 | -0.66         | 0.07119 | -1.24         | 0.01055 |
| STM2737         | STM2737   | hypothetical protein STM2737                  | 0.35          | 0.57102 | -1.00         | 0.03384 | 0.18          | 0.67927 |

**Table S2.** Genome-wide expression of *Salmonella enterica* serovar Typhimurium inside fibroblasts

Intracellular WT 24 h p.i.      Intracellular *phoP* 24 h p.i.      Extracellular WT stationary phase

Relative to WT exponential LB      Relative to *phoP* exponential LB      Relative to WT exponential LB



| Systematic name | Gene       | Product                                                   | log2Ratio (M) | p value | log2Ratio (M) | p value | log2Ratio (M) | p value |
|-----------------|------------|-----------------------------------------------------------|---------------|---------|---------------|---------|---------------|---------|
| STM2739         | STM2739    | phage tail-like protein                                   | -0.66         | 0.17908 | 0.22          | 0.59210 | 0.00          | 0.99405 |
| STM2739         | STM2739    | phage tail-like protein                                   | -0.07         | 0.88800 | 0.58          | 0.10070 | 0.31          | 0.59981 |
| STM2740         | STM2740    | integrase-like protein                                    | 0.81          | 0.29937 | 1.39          | 0.01126 | 0.98          | 0.02237 |
| STM2740         | STM2740    | integrase-like protein                                    | 1.62          | 0.04803 | 1.10          | 0.02055 | 1.99          | 0.00820 |
| STM2740,1N      | STM2740,1N | hypothetical protein STM2740,1N                           | -0.19         | 0.71319 | 1.25          | 0.00496 | -0.20         | 0.62276 |
| STM2740,1N      | STM2740,1N | hypothetical protein STM2740,1N                           | 1.67          | 0.02053 | 0.49          | 0.41705 | 1.24          | 0.02090 |
| STM2741         | STM2741    | putative periplasmic protein                              | -0.65         | 0.22678 | -0.68         | 0.06490 | -0.01         | 0.98262 |
| STM2741         | STM2741    | putative periplasmic protein                              | 0.15          | 0.76912 | -1.14         | 0.03930 | -0.05         | 0.92980 |
| STM2742         | STM2742    | putative cytoplasmic protein                              | -0.53         | 0.23163 | -0.10         | 0.78725 | -1.02         | 0.06255 |
| STM2742         | STM2742    | putative cytoplasmic protein                              | 0.99          | 0.08886 | -0.44         | 0.23082 | 0.71          | 0.09825 |
| STM2743         | STM2743    | putative cytoplasmic protein                              | 2.24          | 0.00991 | 0.24          | 0.44748 | 2.15          | 0.00976 |
| STM2743         | STM2743    | putative cytoplasmic protein                              | 1.95          | 0.03984 | 1.22          | 0.03478 | 1.90          | 0.00487 |
| STM2744         | STM2744    | putative cytoplasmic protein                              | 0.51          | 0.33353 | -1.93         | 0.00051 | 0.12          | 0.84656 |
| STM2744         | STM2744    | putative cytoplasmic protein                              | 3.28          | 0.11724 | -1.30         | 0.00793 | 1.87          | 0.02943 |
| STM2745         | STM2745    | putative inner membrane protein                           | -0.98         | 0.06894 | -0.60         | 0.47160 | -0.99         | 0.07820 |
| STM2745         | STM2745    | putative inner membrane protein                           | 1.19          | 0.17736 | -1.07         | 0.01146 | 0.99          | 0.16585 |
| STM2746         | STM2746    | putative ATPase                                           | 0.60          | 0.30866 | -0.67         | 0.25202 | 0.19          | 0.71871 |
| STM2746         | STM2746    | putative ATPase                                           | 0.50          | 0.61411 | -0.67         | 0.08898 | 2.07          | 0.00105 |
| STM2747         | STM2747    | putative cytoplasmic protein                              | -1.45         | 0.02777 | 0.08          | 0.89250 | -0.65         | 0.08700 |
| STM2747         | STM2747    | putative cytoplasmic protein                              | -1.32         | 0.08055 | -0.35         | 0.36074 | -0.82         | 0.12911 |
| STM2748         | STM2748    | putative transcriptional regulator                        | 1.96          | 0.45553 | -0.56         | 0.11878 | -0.17         | 0.92217 |
| STM2748         | STM2748    | putative transcriptional regulator                        | -0.37         | 0.46285 | -0.53         | 0.11177 | -1.00         | 0.07016 |
| STM2749         | STM2749    | putative cytoplasmic protein                              | 0.71          | 0.30575 | 2.27          | 0.00199 | 0.04          | 0.96985 |
| STM2749         | STM2749    | putative cytoplasmic protein                              | 3.31          | 0.00673 | 1.49          | 0.02139 | 2.86          | 0.00026 |
| STM2750         | STM2750    | putative PTS system glucitol/sorbitol-specific enzyme II  | 0.43          | 0.65179 | 0.30          | 0.44380 | -0.28         | 0.57711 |
| STM2750         | STM2750    | putative PTS system glucitol/sorbitol-specific enzyme II  | 2.22          | 0.13268 | -0.65         | 0.09742 | 0.26          | 0.53505 |
| STM2751         | STM2751    | putative glucitol-specific PTS enzyme III                 | 2.69          | 0.02845 | -1.22         | 0.01612 | -0.61         | 0.17935 |
| STM2751         | STM2751    | putative glucitol-specific PTS enzyme III                 | 1.65          | 0.06801 | -1.65         | 0.01305 | 0.64          | 0.32899 |
| STM2752         | STM2752    | putative glucitol-specific PTS enzyme III                 | 0.41          | 0.50249 | -0.26         | 0.32335 | 0.11          | 0.86863 |
| STM2752         | STM2752    | putative glucitol-specific PTS enzyme III                 | 1.85          | 0.02319 | 0.52          | 0.07804 | 0.13          | 0.79924 |
| STM2753         | STM2753    | putative dehydrogenase                                    | 0.86          | 0.11993 | 0.59          | 0.08740 | -1.59         | 0.03458 |
| STM2753         | STM2753    | putative dehydrogenase                                    | 1.33          | 0.03559 | 0.60          | 0.04762 | 0.09          | 0.89836 |
| STM2754         | STM2754    | putative hexulose 6 phosphate synthase                    | -0.38         | 0.40058 | 0.02          | 0.97377 | 0.69          | 0.07601 |
| STM2754         | STM2754    | putative hexulose 6 phosphate synthase                    | 0.66          | 0.18639 | -0.87         | 0.05922 | 0.53          | 0.18678 |
| STM2755         | STM2755    | putative hexulose 6 phosphate synthase                    | 0.21          | 0.69114 | 0.17          | 0.82048 | -0.97         | 0.36028 |
| STM2755         | STM2755    | putative hexulose 6 phosphate synthase                    | -0.04         | 0.96829 | -0.63         | 0.27907 | -0.69         | 0.28702 |
| STM2756         | STM2756    | putative sugar phosphate aminotransferase                 | -0.16         | 0.78433 | -0.75         | 0.07952 | -0.35         | 0.67946 |
| STM2756         | STM2756    | putative sugar phosphate aminotransferase                 | 0.95          | 0.14274 | -0.98         | 0.00800 | 1.40          | 0.01765 |
| STM2757         | STM2757    | putative cytoplasmic protein                              | -0.32         | 0.60038 | -0.79         | 0.04610 | -0.79         | 0.13879 |
| STM2757         | STM2757    | putative cytoplasmic protein                              | 0.59          | 0.34328 | -1.10         | 0.02954 | 0.32          | 0.64239 |
| STM2758         | STM2758    | putative phosphotransferase system IIC component          | 0.03          | 0.94960 | -0.88         | 0.30050 | -0.29         | 0.55038 |
| STM2758         | STM2758    | putative phosphotransferase system IIC component          | -0.18         | 0.81252 | -0.40         | 0.28286 | 0.03          | 0.94719 |
| STM2759         | STM2759    | putative dipeptide/oligopeptide/nickel ABC-type transport | -0.81         | 0.09456 | 0.11          | 0.80333 | 0.19          | 0.83831 |
| STM2759         | STM2759    | putative dipeptide/oligopeptide/nickel ABC-type transport | 0.74          | 0.38253 | -0.94         | 0.29674 | 1.67          | 0.05079 |
| STM2760         | STM2760    | putative integrase                                        | 0.50          | 0.54351 | -0.21         | 0.79439 | -0.37         | 0.63711 |
| STM2760         | STM2760    | putative integrase                                        | 1.86          | 0.01624 | -1.09         | 0.23082 | 0.69          | 0.13487 |
| STM2761         | STM2761    | putative inner membrane protein                           | -0.47         | 0.44374 | 0.83          | 0.03246 | 0.30          | 0.56915 |
| STM2761         | STM2761    | putative inner membrane protein                           | 0.22          | 0.65919 | -1.12         | 0.02586 | 0.28          | 0.52098 |
| STM2762         | STM2762    | putative inner membrane protein                           | 0.16          | 0.91223 | 0.66          | 0.59990 | 1.46          | 0.01172 |
| STM2762         | STM2762    | putative inner membrane protein                           | 1.37          | 0.04441 | -0.33         | 0.61473 | 0.71          | 0.24775 |
| STM2765         | STM2765    | putative transposase                                      | 0.74          | 0.15557 | 1.26          | 0.00447 | 2.29          | 0.01846 |
| STM2765         | STM2765    | putative transposase                                      | 1.03          | 0.05358 | -0.12         | 0.86267 | 1.46          | 0.02277 |
| STM2767         | STM2767    | putative DNA/RNA helicase                                 | -2.24         | 0.01580 | -0.52         | 0.26485 | -1.91         | 0.00128 |
| STM2767         | STM2767    | putative DNA/RNA helicase                                 | -2.24         | 0.02277 | -0.61         | 0.13041 | -2.25         | 0.00122 |
| STM2768         | STM2768    | putative transposase                                      | 0.30          | 0.71054 | -0.70         | 0.03009 | -0.02         | 0.97431 |
| STM2768         | STM2768    | putative transposase                                      | -0.18         | 0.68575 | -1.40         | 0.00724 | -0.24         | 0.65192 |
| STM2769         | STM2769    | putative transposase                                      | 1.69          | 0.04345 | -0.59         | 0.05733 | -0.33         | 0.45862 |
| STM2769         | STM2769    | putative transposase                                      | 1.25          | 0.03993 | -0.99         | 0.04372 | 0.46          | 0.25786 |
| STM2770         | fljA       | phase-1 flagellin repressor                               | -2.82         | 0.00720 | -3.53         | 0.00003 | -3.01         | 0.00283 |
| STM2770         | fljA       | phase-1 flagellin repressor                               | -2.43         | 0.08953 | -2.58         | 0.00036 | -2.05         | 0.00659 |
| STM2771         | fljB       | flagellar biosynthesis protein                            | -4.11         | 0.00574 | -4.47         | 0.00003 | -4.62         | 0.00006 |
| STM2771         | fljB       | flagellar biosynthesis protein                            | -3.21         | 0.00546 | -4.86         | 0.00001 | -4.73         | 0.00003 |
| STM2772         | hin        | DNA-invertase Hin                                         | -1.16         | 0.11522 | -1.10         | 0.01689 | -1.08         | 0.03240 |
| STM2772         | hin        | DNA-invertase Hin                                         | -0.37         | 0.52193 | -1.01         | 0.01438 | -0.50         | 0.23880 |
| STM2773         | iroB       | putative glycosyl transferase                             | -0.15         | 0.74693 | 4.74          | 0.00006 | -1.03         | 0.07218 |
| STM2773         | iroB       | putative glycosyl transferase                             | 1.55          | 0.01904 | 5.20          | 0.00001 | -0.54         | 0.16215 |
| STM2774         | iroC       | putative ABC transporter protein                          | -0.22         | 0.74749 | 4.53          | 0.00001 | 0.27          | 0.70092 |
| STM2774         | iroC       | putative ABC transporter protein                          | 0.33          | 0.60292 | 4.30          | 0.00002 | 1.02          | 0.02390 |
| STM2775         | iroD       | enterochelin esterase-like protein                        | 0.51          | 0.25814 | 3.90          | 0.00003 | -1.05         | 0.07743 |
| STM2775         | iroD       | enterochelin esterase-like protein                        | 1.38          | 0.03310 | 3.83          | 0.00002 | 0.32          | 0.48893 |

**Table S2.** Genome-wide expression of *Salmonella enterica* serovar Typhimurium inside fibroblasts

Intracellular WT 24 h p.i.      Intracellular *phoP* 24 h p.i.      Extracellular WT stationary phase

Relative to WT exponential LB      Relative to *phoP* exponential LB      Relative to WT exponential LB



| Systematic name | Gene    | Product                                            | log2Ratio (M) | p value | log2Ratio (M) | p value | log2Ratio (M) | p value |
|-----------------|---------|----------------------------------------------------|---------------|---------|---------------|---------|---------------|---------|
| STM2776         | iroE    | putative hydrolase                                 | 0.50          | 0.45142 | 6.36          | 0.00001 | 1.58          | 0.21327 |
| STM2776         | iroE    | putative hydrolase                                 | 3.05          | 0.01849 | 6.33          | 0.00000 | 4.11          | 0.00171 |
| STM2777         | iroN    | TonB-dependent siderophore receptor protein        | 2.54          | 0.12025 | 5.52          | 0.00000 | 0.34          | 0.56617 |
| STM2777         | iroN    | TonB-dependent siderophore receptor protein        | 3.83          | 0.00546 | 5.56          | 0.00007 | 0.64          | 0.54613 |
| STM2780         | pipB2   | secreted effector protein                          | 1.82          | 0.01443 | 10.64         | 0.00000 | -0.19         | 0.74488 |
| STM2780         | pipB2   | secreted effector protein                          | 2.93          | 0.00743 | 9.87          | 0.00000 | 1.65          | 0.04847 |
| STM2781         | virK    | virulence protein                                  | 1.05          | 0.05879 | 2.05          | 0.00040 | -0.33         | 0.60435 |
| STM2781         | virK    | virulence protein                                  | 2.43          | 0.00660 | 1.83          | 0.00055 | 2.01          | 0.00545 |
| STM2782         | mig-14  | putative transcriptional activator                 | 0.80          | 0.30237 | 0.59          | 0.19422 | -0.75         | 0.11487 |
| STM2782         | mig-14  | putative transcriptional activator                 | 2.28          | 0.02122 | -0.46         | 0.45262 | 1.35          | 0.01405 |
| STM2783         | nixA    | putative nickel transporter                        | -0.15         | 0.81771 | 0.50          | 0.25714 | 1.27          | 0.00948 |
| STM2783         | nixA    | putative nickel transporter                        | -0.29         | 0.61132 | -0.09         | 0.86794 | -0.49         | 0.63387 |
| STM2784         | tctE    | regulatory protein                                 | 0.28          | 0.59495 | -0.38         | 0.25939 | 0.28          | 0.53370 |
| STM2784         | tctE    | regulatory protein                                 | 0.15          | 0.72860 | -0.04         | 0.92269 | -1.29         | 0.15298 |
| STM2785         | tctD    | regulatory protein                                 | 0.69          | 0.32343 | 0.59          | 0.09346 | -0.17         | 0.64572 |
| STM2785         | tctD    | regulatory protein                                 | 1.58          | 0.05056 | 0.45          | 0.21528 | 1.16          | 0.04270 |
| STM2786         | STM2786 | tricarboxylic transport                            | 1.96          | 0.02654 | 2.78          | 0.00006 | 2.19          | 0.00494 |
| STM2786         | STM2786 | tricarboxylic transport                            | 2.47          | 0.00908 | 3.49          | 0.00005 | 2.24          | 0.00197 |
| STM2787         | STM2787 | tricarboxylic transport                            | 1.54          | 0.04893 | 1.53          | 0.00185 | -0.88         | 0.03646 |
| STM2787         | STM2787 | tricarboxylic transport                            | 1.88          | 0.01136 | 1.78          | 0.00080 | 0.38          | 0.30620 |
| STM2788         | STM2788 | tricarboxylic transport                            | -0.54         | 0.36741 | 0.82          | 0.01715 | 0.20          | 0.73758 |
| STM2788         | STM2788 | tricarboxylic transport                            | 1.54          | 0.41886 | 0.76          | 0.02343 | -0.37         | 0.57278 |
| STM2789         | STM2789 | hypothetical protein STM2789                       | 0.56          | 0.27110 | 3.17          | 0.00005 | 0.40          | 0.35891 |
| STM2789         | STM2789 | hypothetical protein STM2789                       | 1.63          | 0.01715 | 3.55          | 0.00002 | 1.39          | 0.00776 |
| STM2790         | ygaF    | putative sarcosine oxidase-like protein            | -1.05         | 0.53887 | 0.17          | 0.84941 | 2.01          | 0.00432 |
| STM2790         | ygaF    | putative sarcosine oxidase-like protein            | 2.45          | 0.41986 | 2.74          | 0.11673 | 2.43          | 0.00140 |
| STM2791         | gabD    | succinate-semialdehyde dehydrogenase I             | -0.60         | 0.35051 | 1.90          | 0.00029 | 0.65          | 0.12130 |
| STM2791         | gabD    | succinate-semialdehyde dehydrogenase I             | -0.70         | 0.21362 | 1.77          | 0.00154 | 1.27          | 0.03634 |
| STM2792         | gabT    | 4-aminobutyrate aminotransferase                   | -0.28         | 0.66432 | 1.51          | 0.00263 | 1.22          | 0.04854 |
| STM2792         | gabT    | 4-aminobutyrate aminotransferase                   | 0.37          | 0.51255 | 3.67          | 0.00014 | 1.27          | 0.01174 |
| STM2793         | gabP    | gamma-aminobutyrate transport protein              | 1.72          | 0.03496 | 1.00          | 0.05377 | -0.03         | 0.95177 |
| STM2793         | gabP    | gamma-aminobutyrate transport protein              | 2.70          | 0.00674 | 0.77          | 0.02259 | 1.69          | 0.00855 |
| STM2794         | ygaE    | putative transcriptional repressor                 | -1.55         | 0.01600 | -0.10         | 0.84576 | 2.12          | 0.00186 |
| STM2794         | ygaE    | putative transcriptional repressor                 | -0.39         | 0.43078 | 0.60          | 0.24160 | 2.87          | 0.00030 |
| STM2795         | ygaU    | hypothetical protein STM2795                       | 0.46          | 0.54458 | 2.68          | 0.00035 | 4.46          | 0.00024 |
| STM2795         | ygaU    | hypothetical protein STM2795                       | 1.61          | 0.02573 | 2.99          | 0.00006 | 5.50          | 0.00004 |
| STM2796         | yqaE    | putative transport protein                         | -0.17         | 0.79342 | 1.15          | 0.01055 | 5.62          | 0.00001 |
| STM2796         | yqaE    | putative transport protein                         | 0.52          | 0.36089 | 1.53          | 0.00419 | 5.09          | 0.00005 |
| STM2797         | STM2797 | putative regulatory protein                        | 1.00          | 0.06941 | 3.22          | 0.00005 | 1.62          | 0.00160 |
| STM2797         | STM2797 | putative regulatory protein                        | 1.40          | 0.02339 | 3.39          | 0.00010 | 2.43          | 0.00052 |
| STM2798         | ygaP    | putative rhodanese-like sulfurtransferase          | 0.38          | 0.37363 | 2.82          | 0.00035 | -0.14         | 0.72603 |
| STM2798         | ygaP    | putative rhodanese-like sulfurtransferase          | 1.21          | 0.03218 | 2.80          | 0.00026 | 0.14          | 0.72307 |
| STM2799         | stpA    | DNA-binding protein                                | -1.82         | 0.11797 | -0.42         | 0.17260 | -3.15         | 0.00079 |
| STM2799         | stpA    | DNA-binding protein                                | -1.09         | 0.20593 | 0.02          | 0.96691 | -2.85         | 0.00072 |
| STM2800         | STM2800 | putative inner membrane protein                    | -1.13         | 0.05468 | -0.02         | 0.97250 | 0.47          | 0.35197 |
| STM2800         | STM2800 | putative inner membrane protein                    | -1.80         | 0.02762 | -0.72         | 0.08081 | -0.84         | 0.11558 |
| STM2801         | ygaC    | putative cytoplasmic protein                       | -0.88         | 0.11378 | 0.81          | 0.07874 | 0.36          | 0.30165 |
| STM2801         | ygaC    | putative cytoplasmic protein                       | 0.19          | 0.67883 | 0.40          | 0.20463 | 1.03          | 0.06090 |
| STM2802         | ygaM    | putative inner membrane protein                    | -0.05         | 0.94474 | 0.23          | 0.61822 | 4.25          | 0.00008 |
| STM2802         | ygaM    | putative inner membrane protein                    | 2.35          | 0.05615 | 0.31          | 0.37405 | 4.95          | 0.00002 |
| STM2803         | STM2803 | putative regulatory protein                        | 0.80          | 0.25394 | -0.54         | 0.27859 | 1.97          | 0.00380 |
| STM2803         | STM2803 | putative regulatory protein                        | -0.20         | 0.64775 | 0.17          | 0.57843 | 2.94          | 0.00433 |
| STM2804         | STM2804 | putative cytoplasmic protein                       | -0.12         | 0.81773 | 2.08          | 0.00061 | -0.28         | 0.44194 |
| STM2804         | STM2804 | putative cytoplasmic protein                       | 0.92          | 0.06712 | 2.09          | 0.00166 | 0.63          | 0.12404 |
| STM2805         | nrdH    | glutaredoxin-like protein                          | 0.89          | 0.23356 | 4.36          | 0.00001 | 0.62          | 0.30176 |
| STM2805         | nrdH    | glutaredoxin-like protein                          | 1.95          | 0.00886 | 4.68          | 0.00001 | 0.66          | 0.08117 |
| STM2806         | nrdI    | hypothetical protein STM2806                       | 1.12          | 0.26115 | 4.85          | 0.00000 | 1.02          | 0.01403 |
| STM2806         | nrdI    | hypothetical protein STM2806                       | 2.00          | 0.17171 | 4.35          | 0.00002 | 1.51          | 0.00309 |
| STM2807         | nrdE    | ribonucleotide-diphosphate reductase alpha subunit | -0.14         | 0.83664 | 3.45          | 0.00005 | -0.68         | 0.22942 |
| STM2807         | nrdE    | ribonucleotide-diphosphate reductase alpha subunit | 0.89          | 0.18453 | 3.97          | 0.00006 | 0.08          | 0.90781 |
| STM2808         | nrdF    | ribonucleotide-diphosphate reductase beta subunit  | -0.23         | 0.59965 | 3.92          | 0.00002 | -0.65         | 0.10606 |
| STM2808         | nrdF    | ribonucleotide-diphosphate reductase beta subunit  | 0.80          | 0.27069 | 3.97          | 0.00041 | -0.13         | 0.85901 |
| STM2809         | proV    | glycine/betaine/proline transport protein          | -0.80         | 0.22379 | 1.00          | 0.01536 | 0.24          | 0.70272 |
| STM2809         | proV    | glycine/betaine/proline transport protein          | -0.75         | 0.26604 | 1.75          | 0.00048 | -0.21         | 0.65585 |
| STM2810         | proW    | glycine/betaine/proline transport protein          | -0.50         | 0.25507 | 0.54          | 0.09274 | -0.60         | 0.10520 |
| STM2810         | proW    | glycine/betaine/proline transport protein          | -0.94         | 0.06249 | 1.02          | 0.01022 | -1.06         | 0.26122 |
| STM2811         | proX    | glycine/betaine/proline transport protein          | 0.24          | 0.56647 | 1.07          | 0.01724 | -0.40         | 0.62512 |
| STM2811         | proX    | glycine/betaine/proline transport protein          | 0.55          | 0.41383 | 0.17          | 0.56882 | -2.13         | 0.00103 |
| STM2812         | STM2812 | putative inner membrane protein                    | -0.73         | 0.11387 | -0.34         | 0.28779 | -0.52         | 0.28330 |
| STM2812         | STM2812 | putative inner membrane protein                    | -0.49         | 0.29507 | -1.12         | 0.00789 | -0.70         | 0.22018 |

**Table S2.** Genome-wide expression of *Salmonella enterica* serovar Typhimurium inside fibroblasts

|                 |         |                                                          | Intracellular WT<br>24 h p.i.                                                      |         | Intracellular <i>phoP</i><br>24 h p.i.                                              |         | Extracellular WT<br>stationary phase                                                |         |
|-----------------|---------|----------------------------------------------------------|------------------------------------------------------------------------------------|---------|-------------------------------------------------------------------------------------|---------|-------------------------------------------------------------------------------------|---------|
|                 |         |                                                          | Relative to WT<br>exponential LB                                                   |         | Relative to <i>phoP</i><br>exponential LB                                           |         | Relative to WT<br>exponential LB                                                    |         |
|                 |         |                                                          |  |         |  |         |  |         |
| Systematic name | Gene    | Product                                                  | log2Ratio (M)                                                                      | p value | log2Ratio (M)                                                                       | p value | log2Ratio (M)                                                                       | p value |
| STM2813         | emrR    | emrAB operon transcriptional repressor                   | -1.61                                                                              | 0.01694 | -1.10                                                                               | 0.00605 | -3.53                                                                               | 0.00154 |
| STM2813         | emrR    | emrAB operon transcriptional repressor                   | -0.12                                                                              | 0.84287 | -1.00                                                                               | 0.01870 | -3.44                                                                               | 0.00031 |
| STM2814         | emrA    | multidrug resistance secretion protein                   | 0.22                                                                               | 0.67830 | -0.70                                                                               | 0.07112 | -2.40                                                                               | 0.00204 |
| STM2814         | emrA    | multidrug resistance secretion protein                   | 0.03                                                                               | 0.95819 | -1.24                                                                               | 0.00300 | -2.97                                                                               | 0.00835 |
| STM2815         | emrB    | putative multidrug transport protein                     | -0.11                                                                              | 0.91742 | -0.14                                                                               | 0.76429 | -0.74                                                                               | 0.50663 |
| STM2815         | emrB    | putative multidrug transport protein                     | 0.39                                                                               | 0.44708 | -0.36                                                                               | 0.29184 | -0.03                                                                               | 0.97474 |
| STM2816         | STM2816 | putative glycoporin                                      | 1.83                                                                               | 0.02009 | -0.17                                                                               | 0.61868 | 0.38                                                                                | 0.49153 |
| STM2816         | STM2816 | putative glycoporin                                      | 2.77                                                                               | 0.00595 | 0.02                                                                                | 0.95244 | 1.45                                                                                | 0.06252 |
| STM2817         | luxS    | S-ribosylhomocysteinase                                  | -1.81                                                                              | 0.02198 | 0.81                                                                                | 0.09868 | 0.60                                                                                | 0.13204 |
| STM2817         | luxS    | S-ribosylhomocysteinase                                  | -0.70                                                                              | 0.16726 | 1.28                                                                                | 0.01404 | 1.49                                                                                | 0.00915 |
| STM2818         | gshA    | glutamate--cysteine ligase                               | -0.77                                                                              | 0.26606 | -0.29                                                                               | 0.34338 | -0.81                                                                               | 0.03187 |
| STM2818         | gshA    | glutamate--cysteine ligase                               | -0.39                                                                              | 0.56069 | 0.20                                                                                | 0.49797 | -0.31                                                                               | 0.51217 |
| STM2819         | yqaA    | putative inner membrane protein                          | -0.81                                                                              | 0.12162 | -0.55                                                                               | 0.07948 | -1.40                                                                               | 0.01074 |
| STM2819         | yqaA    | putative inner membrane protein                          | 0.57                                                                               | 0.56439 | -0.38                                                                               | 0.25106 | -0.24                                                                               | 0.62768 |
| STM2820         | yqaB    | putative phosphoglucomutase                              | 1.12                                                                               | 0.33154 | 0.05                                                                                | 0.87434 | -1.91                                                                               | 0.00820 |
| STM2820         | yqaB    | putative phosphoglucomutase                              | 0.92                                                                               | 0.24458 | -0.06                                                                               | 0.86224 | -1.59                                                                               | 0.00358 |
| STM2821         | -       | STM2821                                                  | -1.69                                                                              | 0.04591 | -1.80                                                                               | 0.00114 | -2.15                                                                               | 0.00355 |
| STM2821         | -       | STM2821                                                  | -1.25                                                                              | 0.14668 | -1.99                                                                               | 0.00109 | -2.05                                                                               | 0.00096 |
| STM2822         | -       | STM2822                                                  | -2.01                                                                              | 0.04614 | -2.14                                                                               | 0.00020 | -2.74                                                                               | 0.00025 |
| STM2822         | -       | STM2822                                                  | -1.13                                                                              | 0.18667 | -2.27                                                                               | 0.00016 | -2.53                                                                               | 0.00043 |
| STM2823         | -       | STM2823                                                  | -2.61                                                                              | 0.00650 | -2.45                                                                               | 0.00016 | -2.64                                                                               | 0.00026 |
| STM2823         | -       | STM2823                                                  | -1.50                                                                              | 0.09331 | -2.16                                                                               | 0.00019 | -2.27                                                                               | 0.00430 |
| STM2824         | -       | STM2824                                                  | -2.83                                                                              | 0.00550 | -2.43                                                                               | 0.00010 | -2.60                                                                               | 0.00033 |
| STM2824         | -       | STM2824                                                  | -1.47                                                                              | 0.10091 | -2.24                                                                               | 0.00045 | -2.20                                                                               | 0.00177 |
| STM2825         | -       | STM2825                                                  | -2.25                                                                              | 0.01142 | -1.89                                                                               | 0.00379 | 0.02                                                                                | 0.96274 |
| STM2825         | -       | STM2825                                                  | -1.29                                                                              | 0.03678 | -1.46                                                                               | 0.00175 | -0.09                                                                               | 0.84292 |
| STM2826         | csrA    | carbon storage regulator                                 | -2.40                                                                              | 0.00643 | -1.30                                                                               | 0.00292 | -0.71                                                                               | 0.05966 |
| STM2826         | csrA    | carbon storage regulator                                 | -2.47                                                                              | 0.02573 | -1.06                                                                               | 0.00837 | -0.43                                                                               | 0.39744 |
| STM2827         | alaS    | alanyl-tRNA synthetase                                   | -2.66                                                                              | 0.00581 | -0.43                                                                               | 0.15091 | -2.73                                                                               | 0.00014 |
| STM2827         | alaS    | alanyl-tRNA synthetase                                   | -1.99                                                                              | 0.00864 | -0.66                                                                               | 0.08000 | -1.79                                                                               | 0.00098 |
| STM2828         | recX    | RecA regulator RecX                                      | -1.50                                                                              | 0.02389 | -0.29                                                                               | 0.62367 | -2.58                                                                               | 0.00018 |
| STM2828         | recX    | RecA regulator RecX                                      | -0.55                                                                              | 0.28920 | -0.13                                                                               | 0.72481 | -1.86                                                                               | 0.00538 |
| STM2829         | recA    | recombinase A                                            | 0.51                                                                               | 0.28880 | 1.10                                                                                | 0.02558 | -1.17                                                                               | 0.01144 |
| STM2829         | recA    | recombinase A                                            | 1.20                                                                               | 0.05747 | 1.01                                                                                | 0.02815 | -0.36                                                                               | 0.38617 |
| STM2830         | ygaD    | competence damage-inducible protein A                    | -0.92                                                                              | 0.19163 | -0.94                                                                               | 0.01019 | -0.83                                                                               | 0.06971 |
| STM2830         | ygaD    | competence damage-inducible protein A                    | -0.43                                                                              | 0.31276 | -0.02                                                                               | 0.96048 | -0.81                                                                               | 0.04560 |
| STM2831         | mltB    | membrane-bound lytic murein transglycosylase B           | -1.80                                                                              | 0.02018 | -0.41                                                                               | 0.45792 | -1.12                                                                               | 0.01141 |
| STM2831         | mltB    | membrane-bound lytic murein transglycosylase B           | -1.07                                                                              | 0.21742 | -1.54                                                                               | 0.00317 | -2.81                                                                               | 0.00049 |
| STM2832         | srIA    | glucitol/sorbitol-specific enzyme IIC component          | -0.52                                                                              | 0.27660 | 0.12                                                                                | 0.72227 | -1.54                                                                               | 0.05832 |
| STM2832         | srIA    | glucitol/sorbitol-specific enzyme IIC component          | -0.75                                                                              | 0.32639 | 0.02                                                                                | 0.96465 | -1.27                                                                               | 0.12494 |
| STM2833         | srIE    | glucitol/sorbitol-specific enzyme IIB component          | -0.18                                                                              | 0.73809 | -0.12                                                                               | 0.72017 | -0.39                                                                               | 0.31625 |
| STM2833         | srIE    | glucitol/sorbitol-specific enzyme IIB component          | 0.32                                                                               | 0.59824 | -0.04                                                                               | 0.95522 | 0.04                                                                                | 0.95237 |
| STM2834         | slrB    | glucitol/sorbitol-specific enzyme IIA component          | 0.33                                                                               | 0.69343 | -0.75                                                                               | 0.05500 | -0.56                                                                               | 0.22228 |
| STM2834         | slrB    | glucitol/sorbitol-specific enzyme IIA component          | 1.82                                                                               | 0.01423 | -0.65                                                                               | 0.14568 | -0.19                                                                               | 0.60435 |
| STM2835         | srID    | sorbitol-6-phosphate 2-dehydrogenase                     | -0.41                                                                              | 0.59899 | 0.21                                                                                | 0.56782 | 1.33                                                                                | 0.17783 |
| STM2835         | srID    | sorbitol-6-phosphate 2-dehydrogenase                     | 0.28                                                                               | 0.50087 | 0.54                                                                                | 0.30321 | 1.13                                                                                | 0.01746 |
| STM2836         | gutM    | putative glucitol operon regulatory protein              | -0.63                                                                              | 0.25618 | 0.46                                                                                | 0.11891 | -0.90                                                                               | 0.13191 |
| STM2836         | gutM    | putative glucitol operon regulatory protein              | 1.52                                                                               | 0.02380 | 0.72                                                                                | 0.02277 | -0.26                                                                               | 0.70170 |
| STM2837         | srIR    | transcriptional repressor for glucitol operon            | 1.14                                                                               | 0.04517 | 0.04                                                                                | 0.92124 | 0.63                                                                                | 0.19128 |
| STM2837         | srIR    | transcriptional repressor for glucitol operon            | 1.90                                                                               | 0.01066 | -0.16                                                                               | 0.64814 | 1.66                                                                                | 0.01876 |
| STM2838,S       | gutQ    | putative sugar phosphate isomerase                       | 0.05                                                                               | 0.92278 | -0.31                                                                               | 0.34041 | -0.51                                                                               | 0.19229 |
| STM2838,S       | gutQ    | putative sugar phosphate isomerase                       | 0.57                                                                               | 0.19533 | -0.64                                                                               | 0.08218 | -0.18                                                                               | 0.71447 |
| STM2839         | ygaA    | anaerobic nitric oxide reductase transcription regulator | 0.01                                                                               | 0.97992 | -0.72                                                                               | 0.05103 | -1.91                                                                               | 0.01393 |
| STM2839         | ygaA    | anaerobic nitric oxide reductase transcription regulator | 0.36                                                                               | 0.49299 | -0.66                                                                               | 0.09762 | -0.56                                                                               | 0.42695 |
| STM2840         | STM2840 | anaerobic nitric oxide reductase flavorubredoxin         | 1.40                                                                               | 0.03665 | -0.03                                                                               | 0.93725 | 0.09                                                                                | 0.90469 |
| STM2840         | STM2840 | anaerobic nitric oxide reductase flavorubredoxin         | 1.54                                                                               | 0.03293 | -0.33                                                                               | 0.61214 | 1.13                                                                                | 0.06812 |
| STM2841         | ygbD    | nitric oxide reductase                                   | -0.08                                                                              | 0.92513 | -0.48                                                                               | 0.11589 | -0.06                                                                               | 0.93734 |
| STM2841         | ygbD    | nitric oxide reductase                                   | 0.89                                                                               | 0.29762 | -0.18                                                                               | 0.59083 | 0.11                                                                                | 0.82912 |
| STM2842         | hypF    | hydrogenase maturation protein                           | 1.38                                                                               | 0.04434 | -1.23                                                                               | 0.00257 | -1.19                                                                               | 0.10215 |
| STM2842         | hypF    | hydrogenase maturation protein                           | 0.33                                                                               | 0.67020 | -1.64                                                                               | 0.00282 | -1.67                                                                               | 0.22901 |
| STM2843         | hydN    | electron transport protein                               | -0.23                                                                              | 0.72792 | -0.24                                                                               | 0.63942 | -1.34                                                                               | 0.09005 |
| STM2843         | hydN    | electron transport protein                               | 0.45                                                                               | 0.34889 | -0.66                                                                               | 0.03786 | 0.25                                                                                | 0.85525 |
| STM2844         | STM2844 | hypothetical protein STM2844                             | -0.17                                                                              | 0.71581 | -1.08                                                                               | 0.00876 | -0.01                                                                               | 0.98388 |
| STM2844         | STM2844 | hypothetical protein STM2844                             | 0.03                                                                               | 0.95428 | -0.55                                                                               | 0.21505 | -0.32                                                                               | 0.56241 |
| STM2845         | hycl    | hydrogenase 3 large subunit C-terminal protease          | -0.21                                                                              | 0.63891 | -1.17                                                                               | 0.10263 | -1.01                                                                               | 0.23611 |
| STM2845         | hycl    | hydrogenase 3 large subunit C-terminal protease          | 0.85                                                                               | 0.11826 | -0.84                                                                               | 0.08839 | -0.35                                                                               | 0.44711 |
| STM2846         | hych    | hydrogenase 3 large subunit processing protein           | -0.75                                                                              | 0.25855 | -0.17                                                                               | 0.55066 | -0.81                                                                               | 0.09217 |
| STM2846         | hych    | hydrogenase 3 large subunit processing protein           | 2.02                                                                               | 0.21125 | -0.62                                                                               | 0.05897 | 0.01                                                                                | 0.98279 |
| STM2847         | hycG    | hydrogenase                                              | -0.35                                                                              | 0.55325 | -0.66                                                                               | 0.37488 | -0.49                                                                               | 0.29993 |
| STM2847         | hycG    | hydrogenase                                              | 1.17                                                                               | 0.03084 | 0.49                                                                                | 0.36497 | 1.07                                                                                | 0.06532 |

**Table S2.** Genome-wide expression of *Salmonella enterica* serovar Typhimurium inside fibroblasts

Intracellular WT 24 h p.i.      Intracellular *phoP* 24 h p.i.      Extracellular WT stationary phase

Relative to WT exponential LB      Relative to *phoP* exponential LB      Relative to WT exponential LB



| Systematic name | Gene | Product                                                | log2Ratio (M) | p value | log2Ratio (M) | p value | log2Ratio (M) | p value |
|-----------------|------|--------------------------------------------------------|---------------|---------|---------------|---------|---------------|---------|
| STM2848         | hycF | hydrogenase 4 Fe-S subunit                             | -0.97         | 0.05006 | -1.36         | 0.00597 | -0.47         | 0.50989 |
| STM2848         | hycF | hydrogenase 4 Fe-S subunit                             | 0.75          | 0.25327 | -1.49         | 0.00331 | -1.35         | 0.03522 |
| STM2849         | hycE | hydrogenase 3 large subunit                            | 0.38          | 0.37124 | 0.18          | 0.65595 | -0.21         | 0.78195 |
| STM2849         | hycE | hydrogenase 3 large subunit                            | 1.77          | 0.02316 | 2.25          | 0.00092 | 2.27          | 0.00103 |
| STM2850         | hycD | hydrogenase 3 membrane subunit                         | -0.02         | 0.97058 | -1.01         | 0.15969 | -0.72         | 0.12017 |
| STM2850         | hycD | hydrogenase 3 membrane subunit                         | 0.76          | 0.35641 | -2.16         | 0.00773 | -1.51         | 0.08815 |
| STM2851         | hycC | NADH dehydrogenase subunit N                           | 0.85          | 0.19774 | -0.62         | 0.20794 | -0.63         | 0.08415 |
| STM2851         | hycC | NADH dehydrogenase subunit N                           | 1.16          | 0.07225 | -0.85         | 0.06297 | 0.55          | 0.24353 |
| STM2852         | hycB | hydrogenase-3 iron-sulfur subunit                      | -0.57         | 0.37508 | 0.11          | 0.72851 | 0.15          | 0.78178 |
| STM2852         | hycB | hydrogenase-3 iron-sulfur subunit                      | -1.14         | 0.16085 | -1.30         | 0.00651 | -1.25         | 0.17629 |
| STM2853         | hycA | transcriptional repressor                              | -0.82         | 0.11173 | 0.14          | 0.71237 | -0.67         | 0.37572 |
| STM2853         | hycA | transcriptional repressor                              | 0.46          | 0.58086 | -0.75         | 0.04145 | -0.02         | 0.96184 |
| STM2854         | hypA | hydrogenase nickel incorporation protein               | -0.14         | 0.74592 | -0.55         | 0.13499 | -0.50         | 0.25011 |
| STM2854         | hypA | hydrogenase nickel incorporation protein               | 1.43          | 0.02948 | -0.77         | 0.13075 | 1.21          | 0.01293 |
| STM2855         | hypB | hydrogenase-3 accessory protein                        | 0.03          | 0.95585 | -0.83         | 0.01730 | -0.19         | 0.68762 |
| STM2855         | hypB | hydrogenase-3 accessory protein                        | 0.18          | 0.68574 | -1.14         | 0.01609 | -0.15         | 0.75357 |
| STM2856         | hypC | putative hydrogenase formation protein                 | -0.11         | 0.82751 | -0.09         | 0.87539 | -1.63         | 0.05449 |
| STM2856         | hypC | putative hydrogenase formation protein                 | -0.68         | 0.16482 | -0.83         | 0.01854 | -0.96         | 0.10525 |
| STM2857         | hypD | putative hydrogenase formation protein                 | -1.42         | 0.02720 | -0.74         | 0.11234 | -0.95         | 0.28744 |
| STM2857         | hypD | putative hydrogenase formation protein                 | -0.55         | 0.28623 | -0.63         | 0.05474 | -0.46         | 0.23202 |
| STM2858         | hypE | putative hydrogenase formation protein                 | -1.00         | 0.08378 | -0.22         | 0.69504 | -0.25         | 0.55541 |
| STM2858         | hypE | putative hydrogenase formation protein                 | -1.96         | 0.01999 | -0.86         | 0.03065 | -3.28         | 0.00164 |
| STM2859         | fhlA | formate hydrogen-lyase transcriptional activator       | -0.07         | 0.89762 | 2.96          | 0.00028 | 2.11          | 0.00265 |
| STM2859         | fhlA | formate hydrogen-lyase transcriptional activator       | 2.49          | 0.02407 | 3.12          | 0.00023 | 3.14          | 0.00018 |
| STM2860         | ygbA | putative cytoplasmic protein                           | 0.73          | 0.17133 | 4.16          | 0.00002 | 3.40          | 0.00015 |
| STM2860         | ygbA | putative cytoplasmic protein                           | 1.89          | 0.03064 | 3.44          | 0.00017 | 3.89          | 0.00009 |
| STM2861         | sitA | putative periplasmic binding protein                   | 2.76          | 0.00700 | 7.26          | 0.00000 | 6.83          | 0.00001 |
| STM2861         | sitA | putative periplasmic binding protein                   | 3.27          | 0.00547 | 6.79          | 0.00001 | 7.38          | 0.00001 |
| STM2862         | sitB | putative ATP-binding protein                           | 0.68          | 0.20506 | 5.27          | 0.00000 | 5.46          | 0.00002 |
| STM2862         | sitB | putative ATP-binding protein                           | 2.24          | 0.00942 | 5.77          | 0.00001 | 6.40          | 0.00002 |
| STM2863         | sitC | putative permease                                      | 1.17          | 0.19675 | 4.67          | 0.00001 | 1.88          | 0.02480 |
| STM2863         | sitC | putative permease                                      | 1.86          | 0.05977 | 4.72          | 0.00003 | 2.41          | 0.01054 |
| STM2864         | sitD | putative permease                                      | 0.25          | 0.55141 | 4.51          | 0.00002 | 3.70          | 0.00006 |
| STM2864         | sitD | putative permease                                      | 1.47          | 0.15478 | 4.46          | 0.00005 | 4.34          | 0.00003 |
| STM2865         | avrA | secreted effector protein                              | 2.80          | 0.01715 | 2.66          | 0.00016 | 1.87          | 0.00131 |
| STM2865         | avrA | secreted effector protein                              | 2.80          | 0.02246 | 2.23          | 0.00077 | 2.21          | 0.00321 |
| STM2866         | sprB | transcriptional regulator                              | 0.51          | 0.41383 | 1.02          | 0.01445 | 0.29          | 0.57163 |
| STM2866         | sprB | transcriptional regulator                              | 0.79          | 0.15984 | 1.06          | 0.00609 | 0.72          | 0.12410 |
| STM2867         | hilC | invasion regulatory protein                            | 0.68          | 0.39882 | 0.27          | 0.46659 | 0.54          | 0.46539 |
| STM2867         | hilC | invasion regulatory protein                            | 0.89          | 0.09193 | -0.25         | 0.49860 | -0.16         | 0.67349 |
| STM2868         | orgC | putative cytoplasmic protein                           | -0.05         | 0.94279 | -0.44         | 0.16375 | -0.82         | 0.04673 |
| STM2868         | orgC | putative cytoplasmic protein                           | 0.17          | 0.72227 | -0.52         | 0.19337 | -0.19         | 0.70541 |
| STM2869         | orgB | needle complex export protein                          | -0.80         | 0.49835 | -0.39         | 0.43190 | -0.43         | 0.37967 |
| STM2869         | orgB | needle complex export protein                          | -0.91         | 0.34131 | -0.54         | 0.07929 | -0.73         | 0.05805 |
| STM2870         | orgA | needle complex assembly protein                        | -0.09         | 0.95415 | -0.69         | 0.04145 | -1.37         | 0.15466 |
| STM2870         | orgA | needle complex assembly protein                        | 0.54          | 0.63793 | -0.30         | 0.28355 | -0.51         | 0.60625 |
| STM2871         | prgK | needle complex inner membrane lipoprotein              | -0.07         | 0.86752 | 0.04          | 0.91171 | 0.13          | 0.76817 |
| STM2871         | prgK | needle complex inner membrane lipoprotein              | -0.13         | 0.83332 | 0.20          | 0.53363 | -0.36         | 0.52011 |
| STM2872         | prgJ | needle complex minor subunit                           | -1.69         | 0.02981 | -0.21         | 0.46015 | -0.01         | 0.99035 |
| STM2872         | prgJ | needle complex minor subunit                           | -0.78         | 0.13130 | -0.38         | 0.16506 | -1.13         | 0.01722 |
| STM2873         | prgI | needle complex major subunit                           | -0.87         | 0.10193 | 0.24          | 0.46714 | -2.26         | 0.00792 |
| STM2873         | prgI | needle complex major subunit                           | -0.28         | 0.62037 | -0.17         | 0.61067 | -1.33         | 0.09788 |
| STM2874         | prgH | needle complex inner membrane protein                  | 1.31          | 0.04434 | -0.38         | 0.25544 | 0.18          | 0.77611 |
| STM2874         | prgH | needle complex inner membrane protein                  | 1.27          | 0.06357 | -1.04         | 0.03312 | 1.14          | 0.07722 |
| STM2875         | hilD | invasion protein regulatory protein                    | -0.11         | 0.80975 | -0.59         | 0.06753 | -0.12         | 0.86068 |
| STM2875         | hilD | invasion protein regulatory protein                    | 1.66          | 0.02633 | 0.50          | 0.12485 | 1.29          | 0.01860 |
| STM2876         | hilA | invasion protein transcriptional activator             | 0.17          | 0.78568 | 0.12          | 0.78826 | -0.37         | 0.42989 |
| STM2876         | hilA | invasion protein transcriptional activator             | 0.97          | 0.07214 | 0.03          | 0.95479 | 1.20          | 0.01813 |
| STM2877         | iagB | invasion protein precursor                             | 1.11          | 0.04255 | 0.72          | 0.04123 | 1.45          | 0.01255 |
| STM2877         | iagB | invasion protein precursor                             | 1.80          | 0.04322 | 0.22          | 0.46396 | 1.60          | 0.00475 |
| STM2878         | sptP | protein tyrosine phosphatase/GTPase activating protein | 0.43          | 0.44698 | 0.09          | 0.80211 | -1.51         | 0.02756 |
| STM2878         | sptP | protein tyrosine phosphatase/GTPase activating protein | 1.54          | 0.01488 | 0.19          | 0.72073 | -0.20         | 0.58454 |
| STM2879         | sicP | secretion chaparone                                    | -1.46         | 0.02037 | -0.49         | 0.08979 | -2.10         | 0.00672 |
| STM2879         | sicP | secretion chaparone                                    | -1.55         | 0.02040 | -0.33         | 0.24775 | -2.30         | 0.00030 |
| STM2881         | iapP | acyl carrier protein                                   | -0.88         | 0.14548 | -0.22         | 0.51044 | -0.88         | 0.04188 |
| STM2881         | iapP | acyl carrier protein                                   | -0.85         | 0.07366 | -0.51         | 0.13874 | -1.31         | 0.01296 |
| STM2882         | sipA | secreted effector protein                              | -0.87         | 0.08732 | -0.33         | 0.30524 | -1.50         | 0.01355 |
| STM2882         | sipA | secreted effector protein                              | 0.57          | 0.37965 | -0.08         | 0.79941 | -0.06         | 0.89732 |
| STM2883         | sipD | translocation machinery component                      | -0.51         | 0.35898 | 0.13          | 0.81954 | 0.44          | 0.55303 |
| STM2883         | sipD | translocation machinery component                      | 0.45          | 0.36207 | -0.30         | 0.46541 | -0.14         | 0.79243 |

**Table S2.** Genome-wide expression of *Salmonella enterica* serovar Typhimurium inside fibroblasts

Intracellular WT 24 h p.i.      Intracellular *phoP* 24 h p.i.      Extracellular WT stationary phase

Relative to WT exponential LB      Relative to *phoP* exponential LB      Relative to WT exponential LB



| Systematic name | Gene    | Product                                             | log2Ratio (M) | p value | log2Ratio (M) | p value | log2Ratio (M) | p value |
|-----------------|---------|-----------------------------------------------------|---------------|---------|---------------|---------|---------------|---------|
| STM2884         | sipC    | translocation machinery component                   | -0.87         | 0.36963 | -0.68         | 0.05852 | -0.23         | 0.75680 |
| STM2884         | sipC    | translocation machinery component                   | 0.54          | 0.44680 | 0.42          | 0.43230 | 0.13          | 0.88979 |
| STM2885         | sipB    | translocation machinery component                   | -0.46         | 0.37294 | -0.25         | 0.67941 | -2.60         | 0.00197 |
| STM2885         | sipB    | translocation machinery component                   | 0.58          | 0.19958 | -0.22         | 0.62420 | -0.46         | 0.56848 |
| STM2886         | sicA    | secretion chaperone                                 | 1.03          | 0.04883 | 0.20          | 0.57136 | 1.07          | 0.26778 |
| STM2886         | sicA    | secretion chaperone                                 | 1.39          | 0.06896 | -0.17         | 0.61349 | 2.10          | 0.01158 |
| STM2887         | spaS    | type III secretion protein                          | 0.44          | 0.46942 | -0.16         | 0.71702 | -0.15         | 0.85064 |
| STM2887         | spaS    | type III secretion protein                          | 1.21          | 0.03914 | -0.19         | 0.63567 | 1.18          | 0.02788 |
| STM2888         | spaR    | needle complex export protein                       | -0.04         | 0.96031 | 1.44          | 0.00297 | 2.52          | 0.00027 |
| STM2888         | spaR    | needle complex export protein                       | -0.37         | 0.76178 | 1.45          | 0.00947 | 2.67          | 0.00016 |
| STM2889         | spaQ    | needle complex export protein                       | -0.87         | 0.11992 | -0.12         | 0.72465 | -0.28         | 0.54128 |
| STM2889         | spaQ    | needle complex export protein                       | -0.64         | 0.30866 | -1.96         | 0.00032 | -0.10         | 0.85901 |
| STM2890         | spaP    | needle complex export protein                       | -1.20         | 0.04933 | -0.25         | 0.39122 | -0.12         | 0.81731 |
| STM2890         | spaP    | needle complex export protein                       | -1.86         | 0.03584 | -1.60         | 0.00369 | -0.65         | 0.25303 |
| STM2891         | spaO    | type III secretion protein                          | -0.12         | 0.90111 | -0.28         | 0.48180 | -0.45         | 0.49926 |
| STM2891         | spaO    | type III secretion protein                          | -1.13         | 0.12587 | -1.26         | 0.00867 | 0.60          | 0.20052 |
| STM2892         | invJ    | needle length control protein                       | 2.85          | 0.00678 | -0.12         | 0.78961 | 1.59          | 0.03125 |
| STM2892         | invJ    | needle length control protein                       | 3.34          | 0.00547 | 0.13          | 0.81389 | 1.97          | 0.00200 |
| STM2893         | invI    | needle complex assembly protein                     | 2.95          | 0.01210 | 0.20          | 0.53718 | 2.68          | 0.00021 |
| STM2893         | invI    | needle complex assembly protein                     | 3.22          | 0.00546 | -0.43         | 0.29342 | 3.46          | 0.00026 |
| STM2894         | invC    | type III secretion system ATPase                    | 1.03          | 0.20566 | -0.48         | 0.18047 | 0.22          | 0.66749 |
| STM2894         | invC    | type III secretion system ATPase                    | 1.56          | 0.09268 | -0.81         | 0.05674 | -0.16         | 0.73040 |
| STM2895         | invB    | secretion chaperone                                 | 0.01          | 0.98038 | -0.84         | 0.02934 | -0.90         | 0.31314 |
| STM2895         | invB    | secretion chaperone                                 | 0.33          | 0.52864 | -0.34         | 0.47621 | -0.17         | 0.79603 |
| STM2896         | invA    | needle complex export protein                       | 0.38          | 0.37797 | -0.11         | 0.91051 | 0.13          | 0.91529 |
| STM2896         | invA    | needle complex export protein                       | 1.71          | 0.22352 | -0.98         | 0.01667 | 1.04          | 0.46740 |
| STM2897         | invE    | invasion protein                                    | -0.61         | 0.15553 | 0.83          | 0.32976 | -0.31         | 0.62551 |
| STM2897         | invE    | invasion protein                                    | 0.54          | 0.54456 | -1.40         | 0.09309 | -1.57         | 0.00681 |
| STM2898         | invG    | outer membrane secretin precursor                   | -0.65         | 0.32904 | -0.06         | 0.85409 | 0.20          | 0.71730 |
| STM2898         | invG    | outer membrane secretin precursor                   | 2.54          | 0.00694 | -0.37         | 0.49843 | 1.19          | 0.01183 |
| STM2899         | invF    | invasion regulatory protein                         | -0.32         | 0.55318 | 0.19          | 0.52785 | 0.52          | 0.47307 |
| STM2899         | invF    | invasion regulatory protein                         | -0.20         | 0.64684 | 0.18          | 0.64464 | 0.25          | 0.58246 |
| STM2900         | invH    | needle complex outer membrane lipoprotein precursor | 1.37          | 0.02245 | -0.05         | 0.93004 | -0.78         | 0.25931 |
| STM2900         | invH    | needle complex outer membrane lipoprotein precursor | 1.35          | 0.02725 | 0.09          | 0.78021 | 0.92          | 0.12048 |
| STM2902         | STM2902 | putative cytoplasmic protein                        | -0.95         | 0.17278 | 0.40          | 0.23082 | -1.50         | 0.00943 |
| STM2902         | STM2902 | putative cytoplasmic protein                        | -0.06         | 0.91468 | -0.07         | 0.84062 | -0.61         | 0.12993 |
| STM2903         | STM2903 | putative cytoplasmic protein                        | 3.71          | 0.00547 | 2.14          | 0.00087 | 2.80          | 0.00462 |
| STM2903         | STM2903 | putative cytoplasmic protein                        | 3.58          | 0.00541 | 1.35          | 0.01405 | 2.66          | 0.00350 |
| STM2904         | STM2904 | putative ABC-type transporter                       | 1.15          | 0.06148 | 2.78          | 0.00005 | 0.01          | 0.97267 |
| STM2904         | STM2904 | putative ABC-type transporter                       | 1.77          | 0.04480 | 2.58          | 0.00008 | 0.92          | 0.04114 |
| STM2905         | STM2905 | putative acetyltransferase                          | 0.06          | 0.91869 | 1.96          | 0.00069 | 0.59          | 0.17099 |
| STM2905         | STM2905 | putative acetyltransferase                          | 0.45          | 0.34307 | 1.86          | 0.00075 | -0.09         | 0.87903 |
| STM2907         | pphB    | serine/threonine protein phosphatase 2              | -0.74         | 0.16772 | -0.53         | 0.14134 | -0.89         | 0.03920 |
| STM2907         | pphB    | serine/threonine protein phosphatase 2              | 1.66          | 0.05585 | 0.83          | 0.09094 | 1.24          | 0.30415 |
| STM2909         | mutS    | DNA mismatch repair protein                         | -1.18         | 0.04752 | -0.12         | 0.86895 | -0.80         | 0.11996 |
| STM2909         | mutS    | DNA mismatch repair protein                         | -0.05         | 0.94061 | -1.41         | 0.00177 | -0.73         | 0.13358 |
| STM2910         | STM2910 | putative cytoplasmic protein                        | 0.66          | 0.31214 | -0.22         | 0.56448 | 1.12          | 0.16256 |
| STM2910         | STM2910 | putative cytoplasmic protein                        | 1.27          | 0.02726 | -0.71         | 0.12156 | 0.99          | 0.05834 |
| STM2911         | STM2911 | putative permease                                   | 0.51          | 0.54930 | -0.21         | 0.81056 | 1.40          | 0.01141 |
| STM2911         | STM2911 | putative permease                                   | 1.44          | 0.21225 | 0.72          | 0.06195 | 0.11          | 0.79508 |
| STM2912         | STM2912 | putative transcriptional regulator                  | 0.15          | 0.77481 | -1.09         | 0.00605 | -0.80         | 0.22292 |
| STM2912         | STM2912 | putative transcriptional regulator                  | 1.23          | 0.03894 | -1.24         | 0.02092 | -0.21         | 0.78566 |
| STM2913         | STM2913 | putative permease                                   | -0.14         | 0.82858 | -0.85         | 0.03719 | -1.05         | 0.07059 |
| STM2913         | STM2913 | putative permease                                   | 1.48          | 0.04650 | -0.30         | 0.53064 | 0.55          | 0.26033 |
| STM2914         | STM2914 | putative nucleoside-diphosphate-sugar epimerase     | -0.50         | 0.32224 | -1.30         | 0.00376 | -0.86         | 0.05846 |
| STM2914         | STM2914 | putative nucleoside-diphosphate-sugar epimerase     | 0.13          | 0.82021 | -2.47         | 0.00617 | 0.59          | 0.29354 |
| STM2915         | ygbM    | putative endonuclease                               | 0.28          | 0.83908 | 0.26          | 0.42775 | 0.84          | 0.24654 |
| STM2915         | ygbM    | putative endonuclease                               | 3.15          | 0.00595 | -0.42         | 0.26220 | 0.70          | 0.07964 |
| STM2916         | ygbL    | hypothetical protein STM2916                        | -0.60         | 0.45278 | -0.89         | 0.05216 | -1.32         | 0.10020 |
| STM2916         | ygbL    | hypothetical protein STM2916                        | 0.95          | 0.21896 | -0.79         | 0.01862 | -0.27         | 0.59738 |
| STM2917         | ygbK    | putative tRNA synthase                              | -0.46         | 0.36461 | -0.59         | 0.08490 | -0.19         | 0.79099 |
| STM2917         | ygbK    | putative tRNA synthase                              | -0.81         | 0.22906 | -0.47         | 0.17868 | -1.00         | 0.43603 |
| STM2918         | ygbJ    | 3-hydroxyisobutyrate dehydrogenase                  | -1.18         | 0.05655 | -0.07         | 0.93755 | -0.67         | 0.14679 |
| STM2918         | ygbJ    | 3-hydroxyisobutyrate dehydrogenase                  | -0.22         | 0.70460 | -1.27         | 0.00421 | -0.86         | 0.10638 |
| STM2919         | ygbI    | putative regulatory protein                         | -0.26         | 0.55759 | -0.10         | 0.78855 | -0.89         | 0.12743 |
| STM2919         | ygbI    | putative regulatory protein                         | 0.27          | 0.73922 | -0.75         | 0.03381 | 0.32          | 0.63741 |
| STM2920         | STM2920 | putative transcriptional regulator                  | -1.86         | 0.03242 | 0.08          | 0.86983 | 0.21          | 0.54727 |
| STM2920         | STM2920 | putative transcriptional regulator                  | -0.86         | 0.14061 | -0.40         | 0.24066 | -0.71         | 0.17645 |
| STM2921         | STM2921 | putative flavoprotein                               | -1.07         | 0.05126 | -0.08         | 0.89699 | -0.45         | 0.25257 |
| STM2921         | STM2921 | putative flavoprotein                               | 0.58          | 0.48181 | -0.94         | 0.01776 | -1.01         | 0.18188 |

|                 |            |                                                        | Intracellular WT<br>24 h p.i.                                                      |         | Intracellular <i>phoP</i><br>24 h p.i.                                              |         | Extracellular WT<br>stationary phase                                                |         |
|-----------------|------------|--------------------------------------------------------|------------------------------------------------------------------------------------|---------|-------------------------------------------------------------------------------------|---------|-------------------------------------------------------------------------------------|---------|
|                 |            |                                                        | Relative to WT<br>exponential LB                                                   |         | Relative to <i>phoP</i><br>exponential LB                                           |         | Relative to WT<br>exponential LB                                                    |         |
|                 |            |                                                        |  |         |  |         |  |         |
| Systematic name | Gene       | Product                                                | log2Ratio (M)                                                                      | p value | log2Ratio (M)                                                                       | p value | log2Ratio (M)                                                                       | p value |
| STM2922         | STM2922    | putative 3-polyprenyl-4-hydroxybenzoate decarboxylase  | -0.69                                                                              | 0.15634 | 2.08                                                                                | 0.00710 | 0.78                                                                                | 0.11205 |
| STM2922         | STM2922    | putative 3-polyprenyl-4-hydroxybenzoate decarboxylase  | 0.40                                                                               | 0.33154 | 2.59                                                                                | 0.00019 | 1.79                                                                                | 0.00146 |
| STM2923         | STM2923    | putative cytoplasmic protein                           | -0.97                                                                              | 0.25134 | 2.51                                                                                | 0.00355 | 0.66                                                                                | 0.28701 |
| STM2923         | STM2923    | putative cytoplasmic protein                           | 0.27                                                                               | 0.74619 | 2.38                                                                                | 0.00011 | 0.78                                                                                | 0.16736 |
| STM2924         | rpoS       | RNA polymerase sigma factor                            | -1.35                                                                              | 0.27138 | 3.29                                                                                | 0.00004 | 3.18                                                                                | 0.00180 |
| STM2924         | rpoS       | RNA polymerase sigma factor                            | -1.52                                                                              | 0.35714 | 3.77                                                                                | 0.00001 | 3.38                                                                                | 0.00050 |
| STM2925         | nlpD       | lipoprotein                                            | 0.50                                                                               | 0.26606 | 3.70                                                                                | 0.00003 | 2.43                                                                                | 0.00026 |
| STM2925         | nlpD       | lipoprotein                                            | 1.37                                                                               | 0.04182 | 4.07                                                                                | 0.00001 | 3.00                                                                                | 0.00115 |
| STM2926         | pcm        | protein-L-isoaspartate O-methyltransferase             | -1.37                                                                              | 0.02338 | -0.30                                                                               | 0.45792 | -1.39                                                                               | 0.00477 |
| STM2926         | pcm        | protein-L-isoaspartate O-methyltransferase             | -1.43                                                                              | 0.04414 | 0.15                                                                                | 0.63116 | -1.65                                                                               | 0.00859 |
| STM2927         | surE       | acid phosphatase                                       | -2.95                                                                              | 0.01391 | -1.54                                                                               | 0.00077 | -2.01                                                                               | 0.00125 |
| STM2927         | surE       | acid phosphatase                                       | -2.16                                                                              | 0.00829 | -1.47                                                                               | 0.00134 | -2.40                                                                               | 0.00028 |
| STM2928         | ygbO       | tRNA pseudouridine synthase D                          | -0.91                                                                              | 0.35386 | -1.64                                                                               | 0.00094 | -1.07                                                                               | 0.08555 |
| STM2928         | ygbO       | tRNA pseudouridine synthase D                          | -0.62                                                                              | 0.17012 | -1.68                                                                               | 0.00057 | -0.50                                                                               | 0.52742 |
| STM2929         | ispF       | 2-C-methyl-D-erythritol 2,4-cyclodiphosphate synthase  | -2.51                                                                              | 0.00613 | -1.83                                                                               | 0.00042 | -2.64                                                                               | 0.00042 |
| STM2929         | ispF       | 2-C-methyl-D-erythritol 2,4-cyclodiphosphate synthase  | -1.50                                                                              | 0.01545 | -1.44                                                                               | 0.00168 | -2.73                                                                               | 0.00011 |
| STM2930         | ispD       | 2-C-methyl-D-erythritol 4-phosphate cytidyltransferase | -2.68                                                                              | 0.00581 | -1.38                                                                               | 0.01031 | -3.25                                                                               | 0.00018 |
| STM2930         | ispD       | 2-C-methyl-D-erythritol 4-phosphate cytidyltransferase | -1.09                                                                              | 0.55813 | -1.98                                                                               | 0.00036 | -4.51                                                                               | 0.00260 |
| STM2931         | ftsB       | cell division protein FtsB                             | -0.23                                                                              | 0.65388 | -1.32                                                                               | 0.00454 | -4.12                                                                               | 0.00004 |
| STM2931         | ftsB       | cell division protein FtsB                             | 1.12                                                                               | 0.12065 | -1.15                                                                               | 0.01093 | -2.97                                                                               | 0.00041 |
| STM2932         | ygbE       | putative inner membrane protein                        | -1.86                                                                              | 0.01028 | -1.18                                                                               | 0.00579 | -1.85                                                                               | 0.00150 |
| STM2932         | ygbE       | putative inner membrane protein                        | -1.08                                                                              | 0.11472 | -1.07                                                                               | 0.00592 | -0.99                                                                               | 0.15561 |
| STM2933         | cysC       | adenylsulfate kinase                                   | -1.70                                                                              | 0.06792 | 0.41                                                                                | 0.26801 | -1.68                                                                               | 0.03742 |
| STM2933         | cysC       | adenylsulfate kinase                                   | -0.15                                                                              | 0.89576 | 0.81                                                                                | 0.01999 | -0.95                                                                               | 0.02950 |
| STM2934         | cysN       | sulfate adenyltransferase subunit 1                    | -0.15                                                                              | 0.75850 | 1.86                                                                                | 0.00084 | -0.61                                                                               | 0.32047 |
| STM2934         | cysN       | sulfate adenyltransferase subunit 1                    | 0.85                                                                               | 0.17118 | 1.80                                                                                | 0.00197 | 0.93                                                                                | 0.09568 |
| STM2935         | cysD       | sulfate adenyltransferase subunit 2                    | 2.08                                                                               | 0.01217 | 2.90                                                                                | 0.00011 | 1.60                                                                                | 0.02467 |
| STM2935         | cysD       | sulfate adenyltransferase subunit 2                    | 3.36                                                                               | 0.00541 | 2.22                                                                                | 0.00096 | 0.31                                                                                | 0.64309 |
| STM2936         | iap        | aminopeptidase                                         | 0.16                                                                               | 0.86161 | -1.07                                                                               | 0.05311 | -0.38                                                                               | 0.63830 |
| STM2936         | iap        | aminopeptidase                                         | 2.07                                                                               | 0.03367 | -1.94                                                                               | 0.00049 | 0.69                                                                                | 0.30882 |
| STM2937         | ygbF       | putative inner membrane protein                        | -0.12                                                                              | 0.82344 | 0.30                                                                                | 0.45604 | -0.79                                                                               | 0.04937 |
| STM2937         | ygbF       | putative inner membrane protein                        | -0.06                                                                              | 0.90577 | 0.16                                                                                | 0.72465 | 0.15                                                                                | 0.75832 |
| STM2938         | STM2938    | putative cytoplasmic protein                           | 0.73                                                                               | 0.38484 | 0.53                                                                                | 0.09592 | -0.37                                                                               | 0.56284 |
| STM2938         | STM2938    | putative cytoplasmic protein                           | 1.10                                                                               | 0.31261 | -0.57                                                                               | 0.08234 | -0.50                                                                               | 0.45021 |
| STM2939         | ygch       | putative cytoplasmic protein                           | -0.92                                                                              | 0.08322 | -0.39                                                                               | 0.22319 | -0.89                                                                               | 0.14039 |
| STM2939         | ygch       | putative cytoplasmic protein                           | 1.11                                                                               | 0.30769 | -0.27                                                                               | 0.49976 | 0.32                                                                                | 0.45406 |
| STM2940         | STM2940    | putative cytoplasmic protein                           | -0.67                                                                              | 0.28679 | 0.15                                                                                | 0.68251 | -0.85                                                                               | 0.11004 |
| STM2940         | STM2940    | putative cytoplasmic protein                           | -0.16                                                                              | 0.72937 | -0.74                                                                               | 0.04497 | -0.22                                                                               | 0.68291 |
| STM2941         | ygHJ       | putative cytoplasmic protein                           | 1.05                                                                               | 0.49835 | -0.22                                                                               | 0.56308 | -0.75                                                                               | 0.36411 |
| STM2941         | ygHJ       | putative cytoplasmic protein                           | 0.27                                                                               | 0.62447 | -0.14                                                                               | 0.71963 | -0.12                                                                               | 0.76099 |
| STM2942         | STM2942    | putative transposase                                   | 0.13                                                                               | 0.85864 | -0.32                                                                               | 0.46714 | -1.48                                                                               | 0.01993 |
| STM2942         | STM2942    | putative transposase                                   | 0.88                                                                               | 0.10533 | -0.44                                                                               | 0.30330 | -0.21                                                                               | 0.63737 |
| STM2943         | STM2943    | putative cytoplasmic protein                           | 2.69                                                                               | 0.03383 | 1.97                                                                                | 0.00185 | 4.83                                                                                | 0.00045 |
| STM2943         | STM2943    | putative cytoplasmic protein                           | 2.93                                                                               | 0.00626 | 1.94                                                                                | 0.01807 | 4.84                                                                                | 0.00006 |
| STM2944         | ygCB       | putative helicase                                      | -0.03                                                                              | 0.96631 | -0.29                                                                               | 0.52035 | -1.20                                                                               | 0.05165 |
| STM2944         | ygCB       | putative helicase                                      | 0.64                                                                               | 0.35507 | -0.55                                                                               | 0.16994 | -0.24                                                                               | 0.61526 |
| STM2945         | sopD       | secreted effector protein                              | 0.16                                                                               | 0.69832 | -0.26                                                                               | 0.40979 | 0.61                                                                                | 0.37924 |
| STM2945         | sopD       | secreted effector protein                              | 1.20                                                                               | 0.06803 | -0.11                                                                               | 0.78370 | 0.91                                                                                | 0.27648 |
| STM2946         | cysH       | phosphoadenosine phosphosulfate reductase              | 0.48                                                                               | 0.34817 | 1.12                                                                                | 0.00801 | 0.33                                                                                | 0.66582 |
| STM2946         | cysH       | phosphoadenosine phosphosulfate reductase              | 1.92                                                                               | 0.02314 | 0.19                                                                                | 0.63084 | 0.87                                                                                | 0.19653 |
| STM2947         | cysI       | sulfite reductase alpha subunit                        | 0.40                                                                               | 0.69215 | 0.70                                                                                | 0.03893 | -1.53                                                                               | 0.00519 |
| STM2947         | cysI       | sulfite reductase alpha subunit                        | 1.66                                                                               | 0.13710 | 0.61                                                                                | 0.11646 | -0.58                                                                               | 0.30591 |
| STM2948         | cysJ       | sulfite reductase beta subunit                         | 0.46                                                                               | 0.30250 | 1.36                                                                                | 0.00156 | 0.15                                                                                | 0.77472 |
| STM2948         | cysJ       | sulfite reductase beta subunit                         | 0.70                                                                               | 0.23325 | 0.87                                                                                | 0.28895 | 1.11                                                                                | 0.04207 |
| STM2949         | ptpS       | putative 6-pyruvoyl tetrahydrobiopterin synthase       | -0.87                                                                              | 0.17832 | -1.13                                                                               | 0.00363 | -1.91                                                                               | 0.00140 |
| STM2949         | ptpS       | putative 6-pyruvoyl tetrahydrobiopterin synthase       | -0.09                                                                              | 0.87411 | -0.54                                                                               | 0.08354 | -1.22                                                                               | 0.10271 |
| STM2950         | STM2950    | putative metal-dependent hydrolase                     | -0.59                                                                              | 0.42296 | -0.41                                                                               | 0.44162 | -1.25                                                                               | 0.07628 |
| STM2950         | STM2950    | putative metal-dependent hydrolase                     | 0.67                                                                               | 0.14032 | -0.97                                                                               | 0.03027 | -0.90                                                                               | 0.08184 |
| STM2951         | ygCF       | hypothetical protein STM2951                           | -1.30                                                                              | 0.04794 | -0.60                                                                               | 0.04440 | -0.95                                                                               | 0.04152 |
| STM2951         | ygCF       | hypothetical protein STM2951                           | -1.04                                                                              | 0.05440 | -0.80                                                                               | 0.03626 | -0.77                                                                               | 0.08442 |
| STM2952         | eno        | phosphopyruvate hydratase                              | -1.08                                                                              | 0.04933 | -1.08                                                                               | 0.02674 | -0.84                                                                               | 0.08201 |
| STM2952         | eno        | phosphopyruvate hydratase                              | -0.16                                                                              | 0.81928 | -0.82                                                                               | 0.02638 | -0.40                                                                               | 0.26395 |
| STM2953         | pyrG       | CTP synthetase                                         | -3.17                                                                              | 0.00546 | -0.58                                                                               | 0.13574 | -1.17                                                                               | 0.00948 |
| STM2953         | pyrG       | CTP synthetase                                         | -2.58                                                                              | 0.00747 | -0.35                                                                               | 0.21455 | -0.75                                                                               | 0.08950 |
| STM2954         | mazG       | putative pyrophosphatase                               | 1.79                                                                               | 0.01824 | -0.81                                                                               | 0.02172 | 1.82                                                                                | 0.00722 |
| STM2954         | mazG       | putative pyrophosphatase                               | 2.36                                                                               | 0.02897 | -0.44                                                                               | 0.41715 | 2.44                                                                                | 0.00046 |
| STM2954,1n      | STM2954,1n | hypothetical protein STM2954,1n                        | 0.25                                                                               | 0.76779 | 0.55                                                                                | 0.21683 | -0.15                                                                               | 0.79129 |
| STM2954,1n      | STM2954,1n | hypothetical protein STM2954,1n                        | -0.18                                                                              | 0.86272 | 0.28                                                                                | 0.34110 | -0.54                                                                               | 0.60536 |
| STM2955,S       | STM2955,S  | putative transcriptional regulator                     | -0.20                                                                              | 0.64143 | 0.71                                                                                | 0.03202 | 0.12                                                                                | 0.78971 |
| STM2955,S       | STM2955,S  | putative transcriptional regulator                     | 0.59                                                                               | 0.19486 | 0.68                                                                                | 0.03640 | 0.87                                                                                | 0.05801 |

**Table S2.** Genome-wide expression of *Salmonella enterica* serovar Typhimurium inside fibroblasts

|                 |            |                                                | Intracellular WT<br>24 h p.i.                                                      |         | Intracellular <i>phoP</i><br>24 h p.i.                                              |         | Extracellular WT<br>stationary phase                                                |         |
|-----------------|------------|------------------------------------------------|------------------------------------------------------------------------------------|---------|-------------------------------------------------------------------------------------|---------|-------------------------------------------------------------------------------------|---------|
|                 |            |                                                | Relative to WT<br>exponential LB                                                   |         | Relative to <i>phoP</i><br>exponential LB                                           |         | Relative to WT<br>exponential LB                                                    |         |
|                 |            |                                                |  |         |  |         |  |         |
| Systematic name | Gene       | Product                                        | log2Ratio (M)                                                                      | p value | log2Ratio (M)                                                                       | p value | log2Ratio (M)                                                                       | p value |
| STM2956         | relA       | (p)ppGpp synthetase I                          | 0.45                                                                               | 0.41205 | -0.63                                                                               | 0.12297 | -1.68                                                                               | 0.00591 |
| STM2956         | relA       | (p)ppGpp synthetase I                          | 0.90                                                                               | 0.16748 | -0.91                                                                               | 0.01016 | -0.67                                                                               | 0.19230 |
| STM2957         | rumA       | 23S rRNA (uracil-5-)-methyltransferase         | -1.62                                                                              | 0.05303 | -0.70                                                                               | 0.05120 | -2.10                                                                               | 0.00036 |
| STM2957         | rumA       | 23S rRNA (uracil-5-)-methyltransferase         | -1.00                                                                              | 0.10399 | -0.55                                                                               | 0.10115 | -1.98                                                                               | 0.00133 |
| STM2958         | barA       | sensor histidine kinase                        | -1.04                                                                              | 0.21645 | 0.45                                                                                | 0.18658 | -0.48                                                                               | 0.26079 |
| STM2958         | barA       | sensor histidine kinase                        | 0.95                                                                               | 0.17589 | 0.50                                                                                | 0.09810 | 0.62                                                                                | 0.13160 |
| STM2959         | STM2959    | putative glycerate kinase 2                    | 0.06                                                                               | 0.90196 | 0.31                                                                                | 0.51093 | -0.19                                                                               | 0.74716 |
| STM2959         | STM2959    | putative glycerate kinase 2                    | 0.90                                                                               | 0.58533 | -0.64                                                                               | 0.08703 | -0.26                                                                               | 0.69838 |
| STM2960         | gudD       | d-glucarate dehydratase                        | 0.25                                                                               | 0.66927 | 0.95                                                                                | 0.01199 | -0.15                                                                               | 0.77436 |
| STM2960         | gudD       | d-glucarate dehydratase                        | 0.57                                                                               | 0.30591 | 0.24                                                                                | 0.60307 | 1.05                                                                                | 0.07954 |
| STM2961         | ygcY       | putative D-glucarate dehydratase               | 0.20                                                                               | 0.75580 | 0.43                                                                                | 0.34483 | 0.05                                                                                | 0.92862 |
| STM2961         | ygcY       | putative D-glucarate dehydratase               | 1.36                                                                               | 0.27724 | 0.47                                                                                | 0.15631 | 0.57                                                                                | 0.23179 |
| STM2962         | gudT       | putative D-glucarate permease                  | -1.31                                                                              | 0.06653 | -0.48                                                                               | 0.33389 | -1.20                                                                               | 0.11677 |
| STM2962         | gudT       | putative D-glucarate permease                  | -1.05                                                                              | 0.39076 | -0.22                                                                               | 0.46588 | -0.91                                                                               | 0.05575 |
| STM2963         | STM2963    | flavodoxin                                     | 0.63                                                                               | 0.39749 | -0.03                                                                               | 0.91738 | -0.87                                                                               | 0.13787 |
| STM2963         | STM2963    | flavodoxin                                     | 1.15                                                                               | 0.25202 | -0.71                                                                               | 0.10650 | 0.28                                                                                | 0.52972 |
| STM2964         | yqcB       | putative pseudouridylate synthase              | 0.29                                                                               | 0.82173 | 0.01                                                                                | 0.96756 | 0.05                                                                                | 0.93282 |
| STM2964         | yqcB       | putative pseudouridylate synthase              | 1.79                                                                               | 0.03030 | -0.24                                                                               | 0.43484 | 0.81                                                                                | 0.03948 |
| STM2965         | yqcC       | putative cytoplasmic protein                   | -1.02                                                                              | 0.08684 | 0.36                                                                                | 0.42523 | 1.10                                                                                | 0.01177 |
| STM2965         | yqcC       | putative cytoplasmic protein                   | 0.02                                                                               | 0.96886 | 0.40                                                                                | 0.27371 | 1.42                                                                                | 0.00876 |
| STM2966         | csrB       | STM2966                                        | -0.84                                                                              | 0.40178 | 0.24                                                                                | 0.60199 | 3.27                                                                                | 0.00138 |
| STM2966         | csrB       | STM2966                                        | 1.37                                                                               | 0.02147 | 0.83                                                                                | 0.05733 | 4.24                                                                                | 0.00003 |
| STM2967         | syd        | SecY interacting protein Syd                   | -1.24                                                                              | 0.05440 | -0.42                                                                               | 0.25132 | 1.32                                                                                | 0.01362 |
| STM2967         | syd        | SecY interacting protein Syd                   | -0.44                                                                              | 0.37335 | 0.16                                                                                | 0.66454 | 0.68                                                                                | 0.25570 |
| STM2968         | yqcD       | putative GTP cyclohydrolase I                  | -1.37                                                                              | 0.02827 | -1.60                                                                               | 0.00065 | -0.89                                                                               | 0.05407 |
| STM2968         | yqcD       | putative GTP cyclohydrolase I                  | -1.27                                                                              | 0.02432 | -1.55                                                                               | 0.00115 | -0.02                                                                               | 0.97990 |
| STM2969         | ygdH       | putative nucleotide binding                    | -1.66                                                                              | 0.06625 | -1.39                                                                               | 0.00208 | -1.42                                                                               | 0.00647 |
| STM2969         | ygdH       | putative nucleotide binding                    | -1.51                                                                              | 0.02153 | -1.34                                                                               | 0.00203 | -1.39                                                                               | 0.03751 |
| STM2970         | sdaC       | putative serine transport protein              | -3.38                                                                              | 0.00546 | -1.96                                                                               | 0.00161 | -3.02                                                                               | 0.00013 |
| STM2970         | sdaC       | putative serine transport protein              | -2.93                                                                              | 0.00929 | -1.72                                                                               | 0.00119 | -2.72                                                                               | 0.00048 |
| STM2971         | sdaB       | L-serine dehydratase/L-threonine deaminase 2   | -0.88                                                                              | 0.26511 | -0.83                                                                               | 0.03193 | -2.16                                                                               | 0.00257 |
| STM2971         | sdaB       | L-serine dehydratase/L-threonine deaminase 2   | -0.62                                                                              | 0.23356 | -0.78                                                                               | 0.02614 | -0.60                                                                               | 0.25889 |
| STM2972         | xni        | exonuclease IX                                 | -0.21                                                                              | 0.70630 | -0.01                                                                               | 0.98802 | 0.80                                                                                | 0.23993 |
| STM2972         | xni        | exonuclease IX                                 | -0.58                                                                              | 0.24454 | -1.02                                                                               | 0.04007 | -1.20                                                                               | 0.02636 |
| STM2973         | fucO       | L-1,2-propanediol oxidoreductase               | -0.23                                                                              | 0.64858 | -1.06                                                                               | 0.05922 | -1.38                                                                               | 0.03921 |
| STM2973         | fucO       | L-1,2-propanediol oxidoreductase               | 0.50                                                                               | 0.35507 | -0.63                                                                               | 0.05975 | -0.56                                                                               | 0.22383 |
| STM2974         | fucA       | L-fucose phosphate aldolase                    | -0.93                                                                              | 0.12044 | -0.26                                                                               | 0.61796 | 0.25                                                                                | 0.62768 |
| STM2974         | fucA       | L-fucose phosphate aldolase                    | -0.74                                                                              | 0.49521 | -0.26                                                                               | 0.47781 | 0.04                                                                                | 0.94831 |
| STM2976         | fucI       | L-fucose isomerase                             | -0.30                                                                              | 0.78037 | 0.10                                                                                | 0.80743 | -0.03                                                                               | 0.97853 |
| STM2976         | fucI       | L-fucose isomerase                             | 0.39                                                                               | 0.42840 | 0.11                                                                                | 0.89459 | 0.98                                                                                | 0.04801 |
| STM2977         | fucK       | L-fuculokinase                                 | -0.56                                                                              | 0.20360 | 0.66                                                                                | 0.11995 | -2.13                                                                               | 0.00073 |
| STM2977         | fucK       | L-fuculokinase                                 | 1.07                                                                               | 0.06252 | 0.75                                                                                | 0.03180 | 0.24                                                                                | 0.65412 |
| STM2978         | fucU       | putative L-fucose-binding protein              | -0.25                                                                              | 0.56768 | 0.51                                                                                | 0.31190 | -0.08                                                                               | 0.90250 |
| STM2978         | fucU       | putative L-fucose-binding protein              | 0.19                                                                               | 0.86747 | 0.28                                                                                | 0.41565 | -0.05                                                                               | 0.92913 |
| STM2979         | fucR       | fuc operon positive regulator                  | 2.01                                                                               | 0.13364 | -0.96                                                                               | 0.05099 | 0.03                                                                                | 0.95480 |
| STM2979         | fucR       | fuc operon positive regulator                  | -0.85                                                                              | 0.11623 | -1.21                                                                               | 0.00289 | -0.58                                                                               | 0.32882 |
| STM2980         | ygdE       | putative SAM-dependent methyltransferase       | -0.92                                                                              | 0.24817 | -0.30                                                                               | 0.34434 | -1.23                                                                               | 0.08029 |
| STM2980         | ygdE       | putative SAM-dependent methyltransferase       | 0.82                                                                               | 0.12778 | -0.09                                                                               | 0.78533 | -1.44                                                                               | 0.00471 |
| STM2981         | ygdD       | hypothetical protein STM2981                   | 2.36                                                                               | 0.21565 | -1.17                                                                               | 0.00768 | -0.78                                                                               | 0.47411 |
| STM2981         | ygdD       | hypothetical protein STM2981                   | 3.08                                                                               | 0.22457 | -1.43                                                                               | 0.00152 | -0.70                                                                               | 0.64751 |
| STM2982         | gcvA       | gcv operon regulator                           | 1.40                                                                               | 0.30712 | -1.77                                                                               | 0.01553 | 0.23                                                                                | 0.86026 |
| STM2982         | gcvA       | gcv operon regulator                           | 2.36                                                                               | 0.07572 | -2.23                                                                               | 0.00519 | 1.37                                                                                | 0.16185 |
| STM2983         | ygdI       | putative lipoprotein                           | 0.93                                                                               | 0.07223 | 1.36                                                                                | 0.00542 | 4.43                                                                                | 0.00003 |
| STM2983         | ygdI       | putative lipoprotein                           | 1.88                                                                               | 0.02655 | 1.17                                                                                | 0.02601 | 5.30                                                                                | 0.00002 |
| STM2984         | csdA       | putative selenocysteine lyase                  | -1.19                                                                              | 0.04778 | -0.58                                                                               | 0.14302 | -0.12                                                                               | 0.78570 |
| STM2984         | csdA       | putative selenocysteine lyase                  | -1.09                                                                              | 0.11040 | -1.22                                                                               | 0.00550 | -0.87                                                                               | 0.05445 |
| STM2985         | ygdK       | putative FeS center assembly protein           | -0.34                                                                              | 0.65172 | -0.13                                                                               | 0.73248 | -0.81                                                                               | 0.09188 |
| STM2985         | ygdK       | putative FeS center assembly protein           | 0.54                                                                               | 0.30479 | -1.30                                                                               | 0.00338 | -1.31                                                                               | 0.21979 |
| STM2986,Sc      | STM2986,Sc | putative integral membrane protein             | -0.36                                                                              | 0.45509 | -0.73                                                                               | 0.10936 | 0.40                                                                                | 0.42025 |
| STM2986,Sc      | STM2986,Sc | putative integral membrane protein             | 0.61                                                                               | 0.17278 | -0.88                                                                               | 0.01896 | -0.03                                                                               | 0.94413 |
| STM2987         | ygdL       | putative enzyme                                | -1.47                                                                              | 0.01997 | -0.24                                                                               | 0.53454 | -1.65                                                                               | 0.00303 |
| STM2987         | ygdL       | putative enzyme                                | -0.05                                                                              | 0.90565 | -1.06                                                                               | 0.00848 | -1.24                                                                               | 0.02305 |
| STM2988         | mltA       | membrane-bound lytic murein transglycosylase A | -1.96                                                                              | 0.11195 | -0.63                                                                               | 0.07020 | -1.09                                                                               | 0.04255 |
| STM2988         | mltA       | membrane-bound lytic murein transglycosylase A | -0.43                                                                              | 0.35870 | -1.31                                                                               | 0.00377 | -0.88                                                                               | 0.10351 |
| STM2989         | metZ       | STM2989                                        | 0.78                                                                               | 0.36511 | 0.98                                                                                | 0.01062 | 3.12                                                                                | 0.00020 |
| STM2989         | metZ       | STM2989                                        | 1.62                                                                               | 0.02640 | 0.48                                                                                | 0.12982 | 3.42                                                                                | 0.00009 |
| STM2990         | metW       | STM2990                                        | 1.10                                                                               | 0.15292 | 0.80                                                                                | 0.03335 | 3.36                                                                                | 0.00016 |
| STM2990         | metW       | STM2990                                        | 2.53                                                                               | 0.05850 | 1.21                                                                                | 0.00522 | 4.06                                                                                | 0.00007 |
| STM2991         | amiC       | N-acetylmuramoyl-L-alanine amidase             | -0.99                                                                              | 0.06859 | 0.54                                                                                | 0.15151 | 1.09                                                                                | 0.01895 |
| STM2991         | amiC       | N-acetylmuramoyl-L-alanine amidase             | 0.27                                                                               | 0.66787 | 0.04                                                                                | 0.93480 | 1.61                                                                                | 0.00175 |

**Table S2.** Genome-wide expression of *Salmonella enterica* serovar Typhimurium inside fibroblasts

Intracellular WT 24 h p.i.      Intracellular *phoP* 24 h p.i.      Extracellular WT stationary phase

Relative to WT exponential LB      Relative to *phoP* exponential LB      Relative to WT exponential LB



| Systematic name | Gene       | Product                                            | log2Ratio (M) | p value | log2Ratio (M) | p value | log2Ratio (M) | p value |
|-----------------|------------|----------------------------------------------------|---------------|---------|---------------|---------|---------------|---------|
| STM2992         | argA       | N-acetylglutamate synthase                         | 0.13          | 0.88576 | 1.41          | 0.00113 | 1.39          | 0.01145 |
| STM2992         | argA       | N-acetylglutamate synthase                         | 0.10          | 0.89485 | 1.07          | 0.00510 | 0.01          | 0.98560 |
| STM2993         | recD       | exonuclease V alpha chain                          | 0.61          | 0.19052 | -0.37         | 0.33250 | -0.71         | 0.13143 |
| STM2993         | recD       | exonuclease V alpha chain                          | 0.74          | 0.11138 | -0.94         | 0.13609 | 0.05          | 0.94551 |
| STM2994         | recB       | exonuclease V beta chain                           | -0.93         | 0.07395 | -0.82         | 0.04898 | -1.65         | 0.00249 |
| STM2994         | recB       | exonuclease V beta chain                           | 0.67          | 0.37359 | -1.18         | 0.00347 | -2.22         | 0.00506 |
| STM2995         | ptr        | protease III                                       | -1.03         | 0.13647 | -0.76         | 0.05812 | 0.16          | 0.85847 |
| STM2995         | ptr        | protease III                                       | -0.74         | 0.15041 | -1.19         | 0.00851 | -1.23         | 0.00592 |
| STM2996         | recC       | exonuclease V subunit                              | -0.86         | 0.09103 | 0.09          | 0.90852 | -0.73         | 0.13966 |
| STM2996         | recC       | exonuclease V subunit                              | 0.42          | 0.44314 | -0.29         | 0.51940 | -0.06         | 0.91110 |
| STM2997         | ppdC       | prepilin peptidase dependent protein C             | -0.12         | 0.82430 | -0.82         | 0.07121 | 0.16          | 0.71113 |
| STM2997         | ppdC       | prepilin peptidase dependent protein C             | 1.44          | 0.02695 | -0.78         | 0.03652 | 0.24          | 0.65920 |
| STM2998         | ygdB       | putative periplasmic protein                       | -0.79         | 0.09758 | -0.97         | 0.27379 | 0.35          | 0.40482 |
| STM2998         | ygdB       | putative periplasmic protein                       | 0.72          | 0.43648 | -0.35         | 0.48995 | -0.09         | 0.94692 |
| STM2999         | ppdB       | prepilin peptidase-dependent protein B             | -1.12         | 0.05531 | 0.37          | 0.20674 | -0.75         | 0.23872 |
| STM2999         | ppdB       | prepilin peptidase-dependent protein B             | 0.72          | 0.65388 | -1.37         | 0.07890 | -1.89         | 0.06538 |
| STM3000         | ppdA       | prepilin peptidase-dependent protein A             | -0.26         | 0.82796 | -1.32         | 0.02309 | -0.29         | 0.45372 |
| STM3000         | ppdA       | prepilin peptidase-dependent protein A             | 0.29          | 0.61864 | -1.96         | 0.00952 | -1.15         | 0.01597 |
| STM3001         | thyA       | thymidylate synthase                               | -1.46         | 0.04097 | -1.83         | 0.00038 | -2.33         | 0.00186 |
| STM3001         | thyA       | thymidylate synthase                               | -1.09         | 0.05175 | -1.89         | 0.00550 | -3.07         | 0.00031 |
| STM3002         | lgt        | prolipoprotein diacylglycerol transferase          | 0.28          | 0.82423 | -0.98         | 0.01544 | -2.54         | 0.00163 |
| STM3002         | lgt        | prolipoprotein diacylglycerol transferase          | -0.78         | 0.32717 | -1.16         | 0.02069 | -1.72         | 0.00297 |
| STM3003         | ptsP       | transcriptional regulator                          | -1.56         | 0.01447 | -0.49         | 0.18690 | -2.41         | 0.00056 |
| STM3003         | ptsP       | transcriptional regulator                          | 0.08          | 0.92754 | -0.65         | 0.05568 | -1.42         | 0.00429 |
| STM3004         | ygdP       | dinucleoside polyphosphate hydrolase               | -0.52         | 0.62853 | -0.23         | 0.41172 | -1.41         | 0.00517 |
| STM3004         | ygdP       | dinucleoside polyphosphate hydrolase               | -0.17         | 0.72168 | -0.39         | 0.28894 | -0.19         | 0.65530 |
| STM3005         | mutH       | DNA mismatch repair protein                        | -0.99         | 0.05136 | -0.73         | 0.07079 | -1.73         | 0.02823 |
| STM3005         | mutH       | DNA mismatch repair protein                        | -0.23         | 0.70353 | -0.73         | 0.04584 | -1.25         | 0.01117 |
| STM3006         | ygdQ       | putative transport protein                         | -0.94         | 0.13248 | -0.99         | 0.00955 | 0.73          | 0.36770 |
| STM3006         | ygdQ       | putative transport protein                         | -1.21         | 0.04277 | -1.32         | 0.00354 | -1.57         | 0.01800 |
| STM3007         | ygdR       | putative peptide transport protein                 | 0.22          | 0.61163 | 0.39          | 0.22967 | 1.78          | 0.00201 |
| STM3007         | ygdR       | putative peptide transport protein                 | 1.15          | 0.05742 | -0.03         | 0.95044 | 2.56          | 0.00068 |
| STM3009         | ygeD       | putative efflux protein                            | -0.87         | 0.12491 | -0.63         | 0.13946 | -0.74         | 0.10947 |
| STM3009         | ygeD       | putative efflux protein                            | 0.81          | 0.43322 | -0.30         | 0.27212 | 0.50          | 0.24034 |
| STM3010         | aas        | 2-acyl-glycerophospho-ethanolamine acyltransferase | -1.45         | 0.02471 | -1.44         | 0.00269 | -2.16         | 0.00692 |
| STM3010         | aas        | 2-acyl-glycerophospho-ethanolamine acyltransferase | -0.40         | 0.41384 | -0.69         | 0.02964 | -1.32         | 0.01166 |
| STM3011         | galR       | galETK operon transcriptional repressor            | -1.20         | 0.12179 | -0.89         | 0.03188 | -0.51         | 0.43682 |
| STM3011         | galR       | galETK operon transcriptional repressor            | -0.54         | 0.23660 | 0.15          | 0.70261 | 0.18          | 0.72486 |
| STM3012         | STM3012    | putative transcriptional regulator                 | -1.02         | 0.15779 | 1.06          | 0.00619 | 0.23          | 0.69105 |
| STM3012         | STM3012    | putative transcriptional regulator                 | 0.08          | 0.88793 | 0.59          | 0.08821 | -0.29         | 0.46831 |
| STM3013         | lysA       | diaminopimelate decarboxylase                      | -0.70         | 0.12638 | 0.18          | 0.56566 | -0.67         | 0.17185 |
| STM3013         | lysA       | diaminopimelate decarboxylase                      | 0.76          | 0.55339 | -0.23         | 0.42200 | -0.08         | 0.94366 |
| STM3014         | lysR       | transcriptional regulator                          | 3.19          | 0.13471 | -0.53         | 0.50717 | 0.21          | 0.80789 |
| STM3014         | lysR       | transcriptional regulator                          | 0.70          | 0.17809 | -0.48         | 0.24559 | 0.09          | 0.92111 |
| STM3015         | ygeA       | putative aspartate racemase                        | 1.54          | 0.03827 | 0.13          | 0.76190 | 0.72          | 0.44825 |
| STM3015         | ygeA       | putative aspartate racemase                        | 0.46          | 0.51127 | -0.35         | 0.26374 | -0.59         | 0.59602 |
| STM3016         | araE       | L-arabinose/proton symport protein                 | 0.79          | 0.18340 | 0.65          | 0.09391 | 0.62          | 0.31491 |
| STM3016         | araE       | L-arabinose/proton symport protein                 | 1.46          | 0.02831 | 0.96          | 0.06759 | 1.66          | 0.00394 |
| STM3017         | kduD       | 2-deoxy-D-gluconate 3-dehydrogenase                | -0.30         | 0.46292 | -1.56         | 0.00287 | -0.57         | 0.29067 |
| STM3017         | kduD       | 2-deoxy-D-gluconate 3-dehydrogenase                | 0.25          | 0.60568 | -0.77         | 0.06963 | 0.12          | 0.82064 |
| STM3018         | kduL       | 5-keto-4-deoxyuronate isomerase                    | 0.56          | 0.23361 | -0.35         | 0.34076 | 0.82          | 0.07691 |
| STM3018         | kduL       | 5-keto-4-deoxyuronate isomerase                    | 0.47          | 0.74145 | -0.92         | 0.07581 | 1.83          | 0.07335 |
| STM3019         | yqeF       | acetyl-CoA acetyltransferase                       | 0.10          | 0.84441 | -0.89         | 0.02331 | -0.32         | 0.65081 |
| STM3019         | yqeF       | acetyl-CoA acetyltransferase                       | 0.69          | 0.24172 | -1.19         | 0.01276 | 0.20          | 0.76136 |
| STM3020         | STM3020    | putative transcriptional regulator                 | 1.08          | 0.07421 | -0.05         | 0.91745 | 0.93          | 0.20863 |
| STM3020         | STM3020    | putative transcriptional regulator                 | 1.31          | 0.02316 | 0.16          | 0.59312 | 0.63          | 0.19060 |
| STM3021         | STM3021    | putative inner membrane protein                    | -0.28         | 0.69860 | -1.82         | 0.00791 | -1.29         | 0.02711 |
| STM3021         | STM3021    | putative inner membrane protein                    | 0.01          | 0.98801 | -1.93         | 0.00190 | -0.86         | 0.07470 |
| STM3022         | STM3022    | putative transport protein                         | -0.96         | 0.12050 | -0.71         | 0.02510 | -1.98         | 0.00544 |
| STM3022         | STM3022    | putative transport protein                         | -0.79         | 0.59066 | -0.96         | 0.02010 | -2.47         | 0.01843 |
| STM3023         | yohL       | putative cytoplasmic protein                       | 0.08          | 0.90413 | 0.81          | 0.02251 | -0.74         | 0.14679 |
| STM3023         | yohL       | putative cytoplasmic protein                       | 0.50          | 0.31432 | 0.65          | 0.09421 | 0.64          | 0.08954 |
| STM3024         | yohM       | putative inner membrane protein                    | -0.39         | 0.65886 | 1.02          | 0.14854 | 1.73          | 0.02986 |
| STM3024         | yohM       | putative inner membrane protein                    | -0.95         | 0.20634 | -0.60         | 0.10119 | -0.06         | 0.90250 |
| STM3025         | STM3025    | putative cytoplasmic protein                       | 0.30          | 0.54661 | -0.59         | 0.05064 | -0.68         | 0.12328 |
| STM3025         | STM3025    | putative cytoplasmic protein                       | 1.02          | 0.14230 | 0.61          | 0.11140 | -0.03         | 0.97999 |
| STM3025,1N      | STM3025,1N | hypothetical protein STM3025,1N                    | 1.25          | 0.08868 | 1.24          | 0.00297 | 2.05          | 0.00178 |
| STM3025,1N      | STM3025,1N | hypothetical protein STM3025,1N                    | 2.99          | 0.00673 | 0.82          | 0.02257 | 4.28          | 0.00006 |
| STM3026         | STM3026    | putative outer membrane protein                    | 0.77          | 0.13471 | -0.08         | 0.84934 | -0.41         | 0.45587 |
| STM3026         | STM3026    | putative outer membrane protein                    | 1.14          | 0.03587 | 0.22          | 0.58022 | -0.24         | 0.80148 |

**Table S2.** Genome-wide expression of *Salmonella enterica* serovar Typhimurium inside fibroblasts

Intracellular WT 24 h p.i.      Intracellular *phoP* 24 h p.i.      Extracellular WT stationary phase

Relative to WT exponential LB      Relative to *phoP* exponential LB      Relative to WT exponential LB



| Systematic name | Gene    | Product                                             | log2Ratio (M) | p value | log2Ratio (M) | p value | log2Ratio (M) | p value |
|-----------------|---------|-----------------------------------------------------|---------------|---------|---------------|---------|---------------|---------|
| STM3027         | stdC    | putative fimbrial chaparone                         | 0.05          | 0.94879 | -0.33         | 0.47177 | -0.53         | 0.40606 |
| STM3027         | stdC    | putative fimbrial chaparone                         | -0.27         | 0.64103 | -0.39         | 0.32335 | -0.48         | 0.42195 |
| STM3028         | stdB    | putative outer membrane usher protein               | 0.58          | 0.41131 | -0.02         | 0.98357 | -0.26         | 0.70170 |
| STM3028         | stdB    | putative outer membrane usher protein               | 1.90          | 0.02998 | 0.62          | 0.75137 | -0.01         | 0.99357 |
| STM3029,S       | stdA    | putative fimbrial-like protein                      | 1.15          | 0.08950 | 0.39          | 0.25242 | 0.55          | 0.36724 |
| STM3029,S       | stdA    | putative fimbrial-like protein                      | 2.65          | 0.02603 | 0.02          | 0.97250 | 1.87          | 0.00458 |
| STM3030         | STM3030 | putative periplasmic protein                        | 3.00          | 0.29764 | -0.18         | 0.61604 | 0.66          | 0.55436 |
| STM3030         | STM3030 | putative periplasmic protein                        | 0.97          | 0.49299 | -1.70         | 0.12480 | -0.61         | 0.27873 |
| STM3031         | STM3031 | Ail/OmpX-like protein                               | 0.84          | 0.32702 | 0.46          | 0.22335 | -0.64         | 0.17672 |
| STM3031         | STM3031 | Ail/OmpX-like protein                               | 0.00          | 0.99561 | -0.08         | 0.85285 | -0.31         | 0.69757 |
| STM3033         | STM3033 | putative nucleic acid-binding protein               | -0.04         | 0.95779 | 0.57          | 0.09230 | -2.02         | 0.00063 |
| STM3033         | STM3033 | putative nucleic acid-binding protein               | -0.05         | 0.92869 | 0.77          | 0.03367 | -1.56         | 0.01961 |
| STM3036         | STM3036 | putative inner membrane protein                     | -0.51         | 0.66812 | 0.11          | 0.87339 | 2.21          | 0.00434 |
| STM3036         | STM3036 | putative inner membrane protein                     | 0.58          | 0.69625 | 0.40          | 0.55189 | 3.75          | 0.00089 |
| STM3037         | glyU    | STM3037                                             | -2.17         | 0.14118 | -2.32         | 0.00224 | 3.24          | 0.00601 |
| STM3037         | glyU    | STM3037                                             | -2.64         | 0.13309 | -2.48         | 0.00048 | 3.16          | 0.00119 |
| STM3038         | STM3038 | putative metalloendopeptidase                       | 2.85          | 0.00654 | -0.63         | 0.06054 | 1.10          | 0.04890 |
| STM3038         | STM3038 | putative metalloendopeptidase                       | 1.92          | 0.04166 | -1.12         | 0.01057 | 1.08          | 0.05027 |
| STM3039         | idi     | isopentenyl-diphosphate delta-isomerase             | -0.88         | 0.09574 | -0.40         | 0.20241 | -1.19         | 0.03063 |
| STM3039         | idi     | isopentenyl-diphosphate delta-isomerase             | -0.42         | 0.61184 | -0.34         | 0.28582 | -0.69         | 0.10375 |
| STM3040         | lysS    | lysyl-tRNA synthetase                               | -1.49         | 0.02536 | -0.98         | 0.00790 | -1.67         | 0.00288 |
| STM3040         | lysS    | lysyl-tRNA synthetase                               | -0.88         | 0.12079 | -0.52         | 0.11489 | -1.65         | 0.00728 |
| STM3041c        | prfB    | peptide chain release factor 2                      | -2.66         | 0.00676 | -0.65         | 0.07738 | -4.21         | 0.00005 |
| STM3041c        | prfB    | peptide chain release factor 2                      | -0.73         | 0.11625 | -0.71         | 0.05760 | -3.44         | 0.00011 |
| STM3042         | recJ    | single-stranded-DNA-specific exonuclease            | -1.34         | 0.06354 | -0.84         | 0.10650 | -2.20         | 0.00114 |
| STM3042         | recJ    | single-stranded-DNA-specific exonuclease            | -0.73         | 0.12186 | -0.35         | 0.31257 | -1.51         | 0.00943 |
| STM3043         | dsbC    | protein disulfide isomerase II                      | -0.45         | 0.34702 | 0.28          | 0.39829 | -0.86         | 0.04600 |
| STM3043         | dsbC    | protein disulfide isomerase II                      | -0.06         | 0.92351 | -0.01         | 0.98628 | 0.91          | 0.10743 |
| STM3044         | xerD    | tyrosine recombinase                                | -0.93         | 0.08960 | -0.07         | 0.82168 | -1.52         | 0.00283 |
| STM3044         | xerD    | tyrosine recombinase                                | -0.32         | 0.77041 | 0.00          | 0.99058 | -1.21         | 0.01344 |
| STM3045         | fldB    | flavodoxin                                          | -1.06         | 0.05808 | -0.23         | 0.48885 | -0.53         | 0.29269 |
| STM3045         | fldB    | flavodoxin                                          | -0.98         | 0.10559 | -0.45         | 0.18632 | -1.17         | 0.03173 |
| STM3046         | ygfX    | putative inner membrane protein                     | -0.88         | 0.13319 | 0.09          | 0.79550 | -0.91         | 0.24973 |
| STM3046         | ygfX    | putative inner membrane protein                     | -0.75         | 0.13204 | -0.10         | 0.76936 | -1.02         | 0.11492 |
| STM3047         | ygfY    | putative cytoplasmic protein                        | -1.19         | 0.09502 | 0.01          | 0.97300 | -1.09         | 0.05620 |
| STM3047         | ygfY    | putative cytoplasmic protein                        | -0.19         | 0.73305 | -0.02         | 0.96157 | -1.24         | 0.02308 |
| STM3048         | ygfZ    | putative aminomethyltransferase                     | -0.95         | 0.07710 | -0.18         | 0.55009 | -0.65         | 0.07641 |
| STM3048         | ygfZ    | putative aminomethyltransferase                     | -0.68         | 0.27378 | -0.48         | 0.14641 | -0.73         | 0.05748 |
| STM3049         | yqfA    | putative hemolysin                                  | -0.78         | 0.11605 | 0.64          | 0.05318 | -1.01         | 0.06086 |
| STM3049         | yqfA    | putative hemolysin                                  | -0.08         | 0.93290 | 0.28          | 0.37964 | -0.42         | 0.45121 |
| STM3050         | yqfB    | hypothetical protein STM3050                        | -0.35         | 0.48699 | 1.24          | 0.00416 | -0.15         | 0.74560 |
| STM3050         | yqfB    | hypothetical protein STM3050                        | 0.69          | 0.29343 | 0.97          | 0.01674 | 0.71          | 0.10352 |
| STM3051         | bglA    | 6-phospho-beta-glucosidase A                        | 0.60          | 0.16310 | -0.49         | 0.12222 | -0.54         | 0.42054 |
| STM3051         | bglA    | 6-phospho-beta-glucosidase A                        | 0.25          | 0.81928 | 0.01          | 0.97933 | -1.10         | 0.08195 |
| STM3052         | STM3052 | putative outer membrane protein                     | 2.19          | 0.00716 | 0.79          | 0.02678 | 2.84          | 0.00025 |
| STM3052         | STM3052 | putative outer membrane protein                     | 3.94          | 0.07023 | 0.69          | 0.10484 | 3.24          | 0.00012 |
| STM3053         | gcvP    | glycine dehydrogenase                               | -1.50         | 0.03449 | 0.89          | 0.01510 | -0.43         | 0.37654 |
| STM3053         | gcvP    | glycine dehydrogenase                               | 0.06          | 0.94176 | 1.16          | 0.00836 | 0.34          | 0.56519 |
| STM3054         | gcvH    | glycine cleavage system protein H                   | -2.37         | 0.01027 | 0.59          | 0.07857 | -2.23         | 0.00247 |
| STM3054         | gcvH    | glycine cleavage system protein H                   | -1.80         | 0.02479 | 1.38          | 0.00346 | -3.05         | 0.00026 |
| STM3055         | gcvT    | aminomethyltransferase                              | -2.13         | 0.02668 | 0.44          | 0.33447 | -1.27         | 0.04297 |
| STM3055         | gcvT    | aminomethyltransferase                              | -2.76         | 0.00700 | 0.66          | 0.15130 | -2.62         | 0.00172 |
| STM3056         | visC    | hypothetical protein STM3056                        | -0.50         | 0.35237 | -0.14         | 0.67758 | -0.76         | 0.06200 |
| STM3056         | visC    | hypothetical protein STM3056                        | 0.57          | 0.21234 | 0.14          | 0.72803 | 0.23          | 0.64791 |
| STM3057         | ubiH    | 2-octaprenyl-6-methoxyphenyl hydroxylase            | -1.87         | 0.00971 | -0.82         | 0.27785 | -1.09         | 0.02438 |
| STM3057         | ubiH    | 2-octaprenyl-6-methoxyphenyl hydroxylase            | -1.65         | 0.02906 | -0.92         | 0.02253 | -1.52         | 0.03128 |
| STM3058         | pepP    | proline aminopeptidase P II                         | 1.33          | 0.44352 | 0.37          | 0.18957 | -1.59         | 0.00860 |
| STM3058         | pepP    | proline aminopeptidase P II                         | 1.10          | 0.51827 | 0.35          | 0.20404 | -1.15         | 0.01575 |
| STM3059,S       | ygfB    | hypothetical protein STM3059,S                      | -0.47         | 0.71936 | -0.18         | 0.68418 | -1.48         | 0.00787 |
| STM3059,S       | ygfB    | hypothetical protein STM3059,S                      | 0.55          | 0.60456 | 0.61          | 0.04425 | -0.92         | 0.03191 |
| STM3060         | ygfE    | putative cytoplasmic protein                        | 2.57          | 0.23789 | 0.19          | 0.56202 | 0.80          | 0.05390 |
| STM3060         | ygfE    | putative cytoplasmic protein                        | 3.20          | 0.02435 | 0.28          | 0.34862 | 1.78          | 0.00170 |
| STM3061         | ygfA    | putative ligase                                     | -1.01         | 0.05601 | -0.15         | 0.75352 | 0.25          | 0.60978 |
| STM3061         | ygfA    | putative ligase                                     | 0.30          | 0.45509 | -0.19         | 0.62159 | 0.75          | 0.06347 |
| STM3062         | serA    | D-3-phosphoglycerate dehydrogenase                  | 0.38          | 0.43948 | 0.75          | 0.03992 | -1.21         | 0.01500 |
| STM3062         | serA    | D-3-phosphoglycerate dehydrogenase                  | 2.01          | 0.01827 | 0.63          | 0.05166 | 0.09          | 0.84705 |
| STM3063         | rpiA    | ribose-5-phosphate isomerase A                      | -0.97         | 0.07730 | -0.41         | 0.18396 | -0.45         | 0.21110 |
| STM3063         | rpiA    | ribose-5-phosphate isomerase A                      | -0.87         | 0.09446 | 0.09          | 0.77185 | -0.30         | 0.58753 |
| STM3064         | iciA    | chromosome replication initiation inhibitor protein | -0.57         | 0.29318 | -0.55         | 0.10190 | -0.27         | 0.53888 |
| STM3064         | iciA    | chromosome replication initiation inhibitor protein | -0.09         | 0.84025 | -0.86         | 0.04593 | 0.61          | 0.14495 |

**Table S2.** Genome-wide expression of *Salmonella enterica* serovar Typhimurium inside fibroblasts

Intracellular WT 24 h p.i.      Intracellular *phoP* 24 h p.i.      Extracellular WT stationary phase

Relative to WT exponential LB      Relative to *phoP* exponential LB      Relative to WT exponential LB



| Systematic name | Gene      | Product                                               | log2Ratio (M) | p value | log2Ratio (M) | p value | log2Ratio (M) | p value |
|-----------------|-----------|-------------------------------------------------------|---------------|---------|---------------|---------|---------------|---------|
| STM3065         | yggE      | hypothetical protein STM3065                          | 0.12          | 0.90330 | -0.05         | 0.87638 | 0.41          | 0.46489 |
| STM3065         | yggE      | hypothetical protein STM3065                          | 1.00          | 0.06328 | -0.33         | 0.37569 | 0.85          | 0.06457 |
| STM3066         | yggA      | arginine exporter protein                             | -1.65         | 0.01970 | -0.37         | 0.70123 | -0.66         | 0.10077 |
| STM3066         | yggA      | arginine exporter protein                             | -0.71         | 0.55347 | -0.83         | 0.01346 | -0.60         | 0.18970 |
| STM3067         | yggB      | putative mechanosensitive channel                     | -1.17         | 0.03242 | 0.53          | 0.11771 | -1.15         | 0.01443 |
| STM3067         | yggB      | putative mechanosensitive channel                     | -1.11         | 0.04986 | 0.23          | 0.54497 | -0.73         | 0.15778 |
| STM3068         | fba       | fructose-bisphosphate aldolase                        | -2.34         | 0.01590 | -0.14         | 0.66071 | -1.31         | 0.00617 |
| STM3068         | fba       | fructose-bisphosphate aldolase                        | -1.63         | 0.04650 | -0.45         | 0.22939 | -0.98         | 0.04408 |
| STM3069         | pgk       | phosphoglycerate kinase                               | -2.01         | 0.37533 | -1.42         | 0.00229 | 0.31          | 0.86528 |
| STM3069         | pgk       | phosphoglycerate kinase                               | -4.20         | 0.01280 | -1.10         | 0.01072 | -1.97         | 0.00823 |
| STM3070         | epd       | D-erythrose 4-phosphate dehydrogenase                 | -2.71         | 0.00925 | -0.34         | 0.25391 | -0.32         | 0.37054 |
| STM3070         | epd       | D-erythrose 4-phosphate dehydrogenase                 | -1.49         | 0.02479 | -0.30         | 0.34689 | 0.10          | 0.82264 |
| STM3071         | STM3071   | putative DNA-binding protein                          | -1.15         | 0.05197 | -1.60         | 0.00321 | 0.03          | 0.94864 |
| STM3071         | STM3071   | putative DNA-binding protein                          | -0.17         | 0.84154 | -1.99         | 0.00055 | -0.40         | 0.28731 |
| STM3072         | STM3072   | putative inner membrane protein                       | -0.78         | 0.18060 | -1.64         | 0.01866 | -1.14         | 0.04263 |
| STM3072         | STM3072   | putative inner membrane protein                       | -0.08         | 0.90940 | -1.04         | 0.00532 | -0.75         | 0.23311 |
| STM3073         | STM3073   | putative ABC-type cobalt transport system permease    | -0.22         | 0.70999 | -1.00         | 0.02182 | -0.89         | 0.03519 |
| STM3073         | STM3073   | putative ABC-type cobalt transport system permease    | 0.75          | 0.14693 | -0.91         | 0.02761 | -0.15         | 0.76913 |
| STM3074         | STM3074   | putative ABC-type cobalt transport system ATP-binding | 0.58          | 0.18678 | -0.90         | 0.11696 | -0.72         | 0.13114 |
| STM3074         | STM3074   | putative ABC-type cobalt transport system ATP-binding | 0.43          | 0.35512 | -0.53         | 0.27785 | -0.71         | 0.23649 |
| STM3075         | STM3075   | putative ABC-type cobalt transport system ATP-binding | -1.29         | 0.10535 | -0.93         | 0.01854 | -0.93         | 0.32842 |
| STM3075         | STM3075   | putative ABC-type cobalt transport system ATP-binding | -0.51         | 0.45920 | -0.67         | 0.09009 | -0.86         | 0.08388 |
| STM3076         | tktA      | transketolase                                         | -1.29         | 0.02805 | -0.65         | 0.03719 | -1.91         | 0.00074 |
| STM3076         | tktA      | transketolase                                         | -1.48         | 0.02445 | -0.51         | 0.18868 | -1.22         | 0.02685 |
| STM3077         | yggG      | putative Zn-dependent protease                        | -1.42         | 0.04586 | -1.21         | 0.02660 | -1.78         | 0.00202 |
| STM3077         | yggG      | putative Zn-dependent protease                        | 0.25          | 0.84059 | -1.66         | 0.00379 | -1.38         | 0.00846 |
| STM3078         | speB      | agmatinase                                            | -1.24         | 0.09433 | -1.30         | 0.00512 | -1.77         | 0.03473 |
| STM3078         | speB      | agmatinase                                            | -0.37         | 0.43011 | -2.21         | 0.00022 | -1.59         | 0.01379 |
| STM3079,S       | STM3079,S | putative hydrolase/acyltransferase                    | -1.63         | 0.01598 | -1.09         | 0.01908 | -1.69         | 0.00207 |
| STM3079,S       | STM3079,S | putative hydrolase/acyltransferase                    | -1.36         | 0.02277 | -1.15         | 0.01180 | -1.45         | 0.00966 |
| STM3080         | STM3080   | putative mannitol dehydrogenase                       | -0.68         | 0.30864 | -0.50         | 0.33007 | -0.50         | 0.30967 |
| STM3080         | STM3080   | putative mannitol dehydrogenase                       | 0.30          | 0.63565 | -0.79         | 0.09727 | 0.55          | 0.30807 |
| STM3081         | STM3081   | putative malate/L-lactate dehydrogenase               | -0.91         | 0.10365 | 0.42          | 0.18698 | 0.21          | 0.72463 |
| STM3081         | STM3081   | putative malate/L-lactate dehydrogenase               | 0.39          | 0.48903 | 0.06          | 0.87925 | 0.63          | 0.22715 |
| STM3082         | STM3082   | putative zinc-binding dehydrogenase                   | 2.24          | 0.00931 | 0.59          | 0.12537 | 1.99          | 0.01620 |
| STM3082         | STM3082   | putative zinc-binding dehydrogenase                   | 1.69          | 0.01227 | 0.27          | 0.47063 | 1.70          | 0.00413 |
| STM3083         | STM3083   | putative mannitol dehydrogenase                       | 4.81          | 0.08308 | 0.93          | 0.24559 | 2.30          | 0.01271 |
| STM3083         | STM3083   | putative mannitol dehydrogenase                       | 8.76          | 0.00190 | 3.00          | 0.00068 | 6.96          | 0.00006 |
| STM3084,S       | STM3084,S | putative regulatory protein                           | -0.94         | 0.11862 | 0.69          | 0.25714 | 0.19          | 0.64309 |
| STM3084,S       | STM3084,S | putative regulatory protein                           | 0.16          | 0.92741 | -0.44         | 0.24170 | -1.15         | 0.25525 |
| STM3085         | STM3085   | putative outer membrane lipoprotein                   | -0.88         | 0.09574 | -0.90         | 0.05877 | -0.68         | 0.36411 |
| STM3085         | STM3085   | putative outer membrane lipoprotein                   | 0.24          | 0.62922 | -0.63         | 0.04120 | -0.27         | 0.52851 |
| STM3086         | speA      | arginine decarboxylase                                | -1.27         | 0.02944 | -1.03         | 0.01538 | 0.34          | 0.35142 |
| STM3086         | speA      | arginine decarboxylase                                | -1.61         | 0.02516 | -1.10         | 0.01548 | -1.40         | 0.00357 |
| STM3087         | yggB      | putative inner membrane protein                       | -2.91         | 0.00595 | -2.37         | 0.00122 | -2.75         | 0.00012 |
| STM3087         | yggB      | putative inner membrane protein                       | -2.57         | 0.00814 | -2.19         | 0.00019 | -2.52         | 0.00039 |
| STM3089         | yggD      | putative inner membrane protein                       | -2.51         | 0.00818 | -1.37         | 0.00289 | -1.94         | 0.02242 |
| STM3089         | yggD      | putative inner membrane protein                       | 0.07          | 0.96762 | -1.56         | 0.00093 | -2.11         | 0.00348 |
| STM3090         | metK      | S-adenosylmethionine synthetase                       | -2.18         | 0.01761 | -0.79         | 0.09349 | -3.16         | 0.00118 |
| STM3090         | metK      | S-adenosylmethionine synthetase                       | -1.72         | 0.03720 | -0.44         | 0.28269 | -2.98         | 0.00500 |
| STM3091         | galP      | galactose/proton symporter                            | -0.48         | 0.37789 | -0.53         | 0.12754 | -0.54         | 0.19172 |
| STM3091         | galP      | galactose/proton symporter                            | 0.65          | 0.22300 | -0.40         | 0.17306 | 0.19          | 0.65684 |
| STM3092         | sprT      | hypothetical protein STM3092                          | -0.91         | 0.21330 | -1.12         | 0.04600 | -2.13         | 0.00172 |
| STM3092         | sprT      | hypothetical protein STM3092                          | -1.39         | 0.08950 | -0.98         | 0.01625 | -0.97         | 0.12985 |
| STM3092         | sprT      | hypothetical protein STM3092                          | -0.16         | 0.72232 | -0.88         | 0.03268 | -1.28         | 0.01966 |
| STM3092         | sprT      | hypothetical protein STM3092                          | -2.50         | 0.02585 | -0.93         | 0.01299 | -2.43         | 0.01412 |
| STM3093         | endA      | DNA-specific endonuclease I                           | -3.68         | 0.00541 | -2.79         | 0.00010 | -3.48         | 0.00092 |
| STM3093         | endA      | DNA-specific endonuclease I                           | -3.15         | 0.03180 | -3.23         | 0.00003 | -4.28         | 0.00256 |
| STM3094         | yggJ      | putative cytoplasmic protein                          | -2.42         | 0.00632 | -1.37         | 0.00315 | -2.78         | 0.00011 |
| STM3094         | yggJ      | putative cytoplasmic protein                          | -1.87         | 0.03577 | -1.50         | 0.00358 | -2.03         | 0.00210 |
| STM3095         | gshB      | glutathione synthetase                                | -2.50         | 0.00755 | -2.18         | 0.03263 | -2.40         | 0.02939 |
| STM3095         | gshB      | glutathione synthetase                                | -1.77         | 0.02172 | -0.70         | 0.10970 | -2.55         | 0.00967 |
| STM3096         | yggE      | hypothetical protein STM3096                          | -0.76         | 0.16584 | 0.67          | 0.38620 | -2.06         | 0.00336 |
| STM3096         | yggE      | hypothetical protein STM3096                          | -1.31         | 0.06100 | 0.34          | 0.34094 | -2.03         | 0.00389 |
| STM3097         | yggF      | Holliday junction resolvase-like protein              | -0.97         | 0.06515 | 0.75          | 0.45824 | -1.78         | 0.01844 |
| STM3097         | yggF      | Holliday junction resolvase-like protein              | -1.77         | 0.02451 | -0.39         | 0.16803 | -3.38         | 0.04091 |
| STM3098         | STM3098   | putative transcriptional regulator                    | -0.35         | 0.75567 | 0.33          | 0.40619 | -0.18         | 0.84449 |
| STM3098         | STM3098   | putative transcriptional regulator                    | 0.59          | 0.21114 | -0.53         | 0.11720 | -0.83         | 0.04339 |
| STM3099         | yggR      | twitching motility protein                            | 0.05          | 0.94591 | -0.78         | 0.12767 | -0.69         | 0.11589 |
| STM3099         | yggR      | twitching motility protein                            | 0.84          | 0.09675 | -1.64         | 0.00495 | 0.11          | 0.78851 |

**Table S2.** Genome-wide expression of *Salmonella enterica* serovar Typhimurium inside fibroblasts

Intracellular WT 24 h.p.i.      Intracellular *phoP* 24 h.p.i.      Extracellular WT stationary phase

Relative to WT exponential LB      Relative to *phoP* exponential LB      Relative to WT exponential LB



| Systematic name | Gene    | Product                                                   | log2Ratio (M) | p value | log2Ratio (M) | p value | log2Ratio (M) | p value |
|-----------------|---------|-----------------------------------------------------------|---------------|---------|---------------|---------|---------------|---------|
| STM3100         | yggS    | hypothetical protein STM3100                              | -2.78         | 0.00567 | -0.54         | 0.09346 | -2.39         | 0.00037 |
| STM3100         | yggS    | hypothetical protein STM3100                              | -1.84         | 0.01041 | -0.67         | 0.05857 | -2.28         | 0.00050 |
| STM3101         | yggT    | putative integral membrane protein                        | -0.52         | 0.27182 | -0.33         | 0.42246 | -1.97         | 0.00229 |
| STM3101         | yggT    | putative integral membrane protein                        | 0.34          | 0.80777 | -0.24         | 0.51970 | -2.93         | 0.00026 |
| STM3102         | yggU    | hypothetical protein STM3102                              | -1.56         | 0.03465 | -0.16         | 0.63673 | -1.57         | 0.03839 |
| STM3102         | yggU    | hypothetical protein STM3102                              | -0.35         | 0.62320 | -0.14         | 0.69958 | -1.95         | 0.01284 |
| STM3103         | yggV    | putative deoxyribonucleotide triphosphate pyrophosphatase | -1.79         | 0.02123 | -1.02         | 0.00547 | -3.42         | 0.00139 |
| STM3103         | yggV    | putative deoxyribonucleotide triphosphate pyrophosphatase | -1.19         | 0.27616 | -1.18         | 0.01295 | -4.05         | 0.00007 |
| STM3104         | yggW    | coproporphyrinogen III oxidase                            | -0.90         | 0.43436 | -0.32         | 0.25079 | -1.03         | 0.26747 |
| STM3104         | yggW    | coproporphyrinogen III oxidase                            | -1.00         | 0.04803 | -0.97         | 0.02179 | -0.87         | 0.09779 |
| STM3105         | yggM    | putative periplasmic protein                              | -0.98         | 0.53249 | 0.42          | 0.18688 | 1.99          | 0.00093 |
| STM3105         | yggM    | putative periplasmic protein                              | -0.89         | 0.61862 | 0.12          | 0.83985 | 2.50          | 0.00120 |
| STM3106         | ansB    | periplasmic L-asparaginase II                             | 2.14          | 0.29889 | 0.19          | 0.68961 | 1.63          | 0.00754 |
| STM3106         | ansB    | periplasmic L-asparaginase II                             | 3.83          | 0.00546 | 0.06          | 0.88895 | 2.98          | 0.00056 |
| STM3107         | yggN    | putative periplasmic protein                              | -0.40         | 0.59931 | 0.65          | 0.10986 | 0.96          | 0.13110 |
| STM3107         | yggN    | putative periplasmic protein                              | -0.47         | 0.45245 | 0.51          | 0.09768 | -0.04         | 0.91391 |
| STM3108         | yggL    | putative cytoplasmic protein                              | -3.09         | 0.01040 | -0.33         | 0.28705 | -1.98         | 0.00075 |
| STM3108         | yggL    | putative cytoplasmic protein                              | -1.48         | 0.02526 | -0.39         | 0.27884 | -1.83         | 0.00132 |
| STM3109         | yggH    | tRNA (guanine-N(7))-methyltransferase                     | -2.47         | 0.01005 | -0.47         | 0.16885 | -1.84         | 0.00106 |
| STM3109         | yggH    | tRNA (guanine-N(7))-methyltransferase                     | -1.86         | 0.13657 | -0.38         | 0.20826 | -1.30         | 0.00708 |
| STM3110         | mutY    | adenine DNA glycosylase                                   | 0.00          | 0.99985 | -2.31         | 0.00083 | -0.38         | 0.47193 |
| STM3110         | mutY    | adenine DNA glycosylase                                   | -0.21         | 0.72794 | -2.99         | 0.00032 | 0.23          | 0.83538 |
| STM3111         | yggX    | hypothetical protein STM3111                              | -1.39         | 0.02908 | 0.39          | 0.29616 | -1.46         | 0.00827 |
| STM3111         | yggX    | hypothetical protein STM3111                              | -0.46         | 0.39064 | 0.33          | 0.30610 | -0.71         | 0.07451 |
| STM3112         | mltC    | membrane-bound lytic murein transglycosylase C            | -1.13         | 0.06424 | -1.19         | 0.00567 | 1.20          | 0.08843 |
| STM3112         | mltC    | membrane-bound lytic murein transglycosylase C            | 0.02          | 0.97285 | -0.91         | 0.05082 | -0.37         | 0.41205 |
| STM3113         | nupG    | nucleoside transport                                      | -0.40         | 0.51096 | -1.63         | 0.00072 | -1.33         | 0.00841 |
| STM3113         | nupG    | nucleoside transport                                      | 0.36          | 0.54043 | -1.90         | 0.00377 | -0.81         | 0.52739 |
| STM3114         | speC    | ornithine decarboxylase isozyme                           | -0.68         | 0.13925 | -0.28         | 0.35209 | 0.19          | 0.66720 |
| STM3114         | speC    | ornithine decarboxylase isozyme                           | 1.35          | 0.32833 | -0.83         | 0.10070 | 1.17          | 0.03582 |
| STM3115         | yggA    | putative inner membrane protein                           | 0.28          | 0.55698 | -0.55         | 0.11803 | -1.21         | 0.00938 |
| STM3115         | yggA    | putative inner membrane protein                           | 0.87          | 0.24298 | -0.51         | 0.10968 | 0.44          | 0.63830 |
| STM3116         | pheV    | STM3116                                                   | -1.39         | 0.02747 | -0.93         | 0.11203 | 4.24          | 0.00006 |
| STM3116         | pheV    | STM3116                                                   | -1.62         | 0.02803 | -1.62         | 0.00677 | 4.47          | 0.00007 |
| STM3118         | STM3118 | putative acetyl-CoA hydrolase                             | -0.57         | 0.21439 | 0.67          | 0.24385 | -0.13         | 0.76234 |
| STM3118         | STM3118 | putative acetyl-CoA hydrolase                             | 1.28          | 0.06677 | 0.56          | 0.06102 | 1.07          | 0.04516 |
| STM3119         | STM3119 | putative monoamine oxidase                                | 0.39          | 0.49636 | 1.22          | 0.03210 | 0.11          | 0.87950 |
| STM3119         | STM3119 | putative monoamine oxidase                                | 0.17          | 0.87036 | -0.19         | 0.67564 | -1.99         | 0.00802 |
| STM3120         | STM3120 | putative transcriptional regulator                        | -0.24         | 0.62903 | 0.64          | 0.06726 | 0.49          | 0.22373 |
| STM3120         | STM3120 | putative transcriptional regulator                        | -0.45         | 0.50245 | -0.44         | 0.29461 | -0.86         | 0.19078 |
| STM3121         | STM3121 | putative transcriptional regulator                        | 2.96          | 0.01645 | -0.77         | 0.17482 | 0.13          | 0.81799 |
| STM3121         | STM3121 | putative transcriptional regulator                        | 1.85          | 0.32468 | -0.77         | 0.02864 | 0.01          | 0.99350 |
| STM3122         | STM3122 | putative arylsulfatase                                    | -0.71         | 0.33541 | -0.25         | 0.45384 | -0.72         | 0.11208 |
| STM3122         | STM3122 | putative arylsulfatase                                    | 0.53          | 0.42475 | 0.27          | 0.33114 | 1.78          | 0.08061 |
| STM3123         | STM3123 | putative arylsulfatase regulator                          | 0.37          | 0.40908 | 0.04          | 0.92755 | -0.26         | 0.53567 |
| STM3123         | STM3123 | putative arylsulfatase regulator                          | 1.21          | 0.14071 | -0.46         | 0.42089 | 1.12          | 0.14117 |
| STM3124         | STM3124 | putative response regulator                               | 0.18          | 0.81970 | -0.53         | 0.16805 | 0.33          | 0.71302 |
| STM3124         | STM3124 | putative response regulator                               | 0.35          | 0.49733 | -0.58         | 0.21987 | -0.31         | 0.55579 |
| STM3125         | STM3125 | putative cytoplasmic protein                              | 0.90          | 0.11460 | -0.19         | 0.79256 | 0.70          | 0.26420 |
| STM3125         | STM3125 | putative cytoplasmic protein                              | 1.23          | 0.04295 | -0.08         | 0.81944 | 0.24          | 0.73382 |
| STM3126         | STM3126 | putative amino acid transporter                           | 1.88          | 0.01950 | 1.14          | 0.05056 | 2.51          | 0.00090 |
| STM3126         | STM3126 | putative amino acid transporter                           | 2.00          | 0.07951 | 0.72          | 0.21002 | 2.44          | 0.00023 |
| STM3127         | STM3127 | putative cytoplasmic protein                              | -0.76         | 0.26824 | 0.37          | 0.37677 | 0.15          | 0.85872 |
| STM3127         | STM3127 | putative cytoplasmic protein                              | -0.51         | 0.28189 | -0.18         | 0.61509 | 0.13          | 0.82517 |
| STM3128         | STM3128 | putative oxidoreductase                                   | 0.85          | 0.09625 | 0.95          | 0.04433 | 1.58          | 0.00297 |
| STM3128         | STM3128 | putative oxidoreductase                                   | -1.64         | 0.03512 | 0.57          | 0.22967 | -0.35         | 0.72626 |
| STM3129         | STM3129 | putative NAD-dependent aldehyde dehydrogenase             | -0.31         | 0.74567 | -0.34         | 0.48409 | -0.30         | 0.66289 |
| STM3129         | STM3129 | putative NAD-dependent aldehyde dehydrogenase             | -0.15         | 0.83951 | -0.15         | 0.67282 | -0.49         | 0.42191 |
| STM3131         | STM3131 | putative cytoplasmic protein                              | 1.74          | 0.03017 | -0.21         | 0.57420 | 0.16          | 0.71302 |
| STM3131         | STM3131 | putative cytoplasmic protein                              | 2.38          | 0.03315 | -0.03         | 0.93155 | 0.74          | 0.31934 |
| STM3132         | STM3132 | putative xylanase/chitin deacetylase                      | 0.06          | 0.88925 | -1.75         | 0.04386 | 0.04          | 0.92086 |
| STM3132         | STM3132 | putative xylanase/chitin deacetylase                      | 0.70          | 0.14114 | -1.13         | 0.07382 | 0.41          | 0.33075 |
| STM3133         | STM3133 | putative amidohydrolase                                   | 2.33          | 0.01669 | 0.12          | 0.89183 | 4.01          | 0.00020 |
| STM3133         | STM3133 | putative amidohydrolase                                   | 2.66          | 0.00720 | 0.86          | 0.15021 | 3.21          | 0.00229 |
| STM3134         | STM3134 | putative permease                                         | 0.77          | 0.21535 | 0.36          | 0.40846 | -0.36         | 0.51519 |
| STM3134         | STM3134 | putative permease                                         | 1.96          | 0.01572 | 1.20          | 0.20341 | 0.49          | 0.45638 |
| STM3135         | STM3135 | mannonate dehydratase                                     | 0.22          | 0.74749 | 0.28          | 0.45291 | 0.32          | 0.52165 |
| STM3135         | STM3135 | mannonate dehydratase                                     | 1.77          | 0.01064 | 1.18          | 0.01434 | 0.83          | 0.04716 |
| STM3136         | STM3136 | putative D-mannonate oxidoreductase                       | 0.41          | 0.44795 | 0.93          | 0.06329 | 0.10          | 0.85570 |
| STM3136         | STM3136 | putative D-mannonate oxidoreductase                       | 1.89          | 0.02344 | 0.88          | 0.02982 | 1.43          | 0.01573 |

|                 |           |                                                          | Intracellular WT<br>24 h p.i.                                                      |         | Intracellular <i>phoP</i><br>24 h p.i.                                              |         | Extracellular WT<br>stationary phase                                                |         |
|-----------------|-----------|----------------------------------------------------------|------------------------------------------------------------------------------------|---------|-------------------------------------------------------------------------------------|---------|-------------------------------------------------------------------------------------|---------|
|                 |           |                                                          | Relative to WT<br>exponential LB                                                   |         | Relative to <i>phoP</i><br>exponential LB                                           |         | Relative to WT<br>exponential LB                                                    |         |
|                 |           |                                                          |  |         |  |         |  |         |
| Systematic name | Gene      | Product                                                  | log2Ratio (M)                                                                      | p value | log2Ratio (M)                                                                       | p value | log2Ratio (M)                                                                       | p value |
| STM3137         | STM3137   | uronate isomerase                                        | -0.04                                                                              | 0.92542 | 0.28                                                                                | 0.40380 | -1.03                                                                               | 0.03292 |
| STM3137         | STM3137   | uronate isomerase                                        | 0.10                                                                               | 0.87586 | 0.30                                                                                | 0.36054 | -0.01                                                                               | 0.97853 |
| STM3138         | STM3138   | putative methyl-accepting chemotaxis protein             | -0.30                                                                              | 0.65495 | -0.19                                                                               | 0.58497 | -0.92                                                                               | 0.07300 |
| STM3138         | STM3138   | putative methyl-accepting chemotaxis protein             | 0.90                                                                               | 0.09689 | -0.24                                                                               | 0.48875 | -0.19                                                                               | 0.64021 |
| STM3139         | gsp       | glutathionylspermidine synthetase/glutathionylspermidine | 1.50                                                                               | 0.02339 | -1.79                                                                               | 0.00182 | -0.37                                                                               | 0.60531 |
| STM3139         | gsp       | glutathionylspermidine synthetase/glutathionylspermidine | 1.63                                                                               | 0.07547 | -2.01                                                                               | 0.00145 | 0.64                                                                                | 0.28054 |
| STM3140         | yghU      | putative glutathione S-transferase                       | 0.29                                                                               | 0.66192 | 0.63                                                                                | 0.13486 | -0.06                                                                               | 0.91420 |
| STM3140         | yghU      | putative glutathione S-transferase                       | 1.38                                                                               | 0.06565 | 0.83                                                                                | 0.02981 | 0.84                                                                                | 0.04513 |
| STM3141         | STM3141   | hypothetical protein STM3141                             | 0.45                                                                               | 0.28946 | 1.31                                                                                | 0.00171 | 0.36                                                                                | 0.35984 |
| STM3141         | STM3141   | hypothetical protein STM3141                             | 1.31                                                                               | 0.04295 | 1.42                                                                                | 0.05398 | 1.66                                                                                | 0.00581 |
| STM3142         | STM3142   | putative periplasmic ferrichrome-binding protein         | 0.11                                                                               | 0.83464 | 1.68                                                                                | 0.00244 | -0.22                                                                               | 0.76913 |
| STM3142         | STM3142   | putative periplasmic ferrichrome-binding protein         | 1.61                                                                               | 0.03715 | 1.74                                                                                | 0.00071 | 0.96                                                                                | 0.05880 |
| STM3143         | hybG      | chaperone-like protein                                   | 0.14                                                                               | 0.75567 | -0.13                                                                               | 0.66912 | -1.27                                                                               | 0.10786 |
| STM3143         | hybG      | chaperone-like protein                                   | 1.20                                                                               | 0.06503 | -0.56                                                                               | 0.14867 | -0.55                                                                               | 0.42608 |
| STM3144         | hypA      | hydrogenase nickel incorporation protein                 | -1.57                                                                              | 0.01955 | -0.41                                                                               | 0.29806 | -0.81                                                                               | 0.04874 |
| STM3144         | hypA      | hydrogenase nickel incorporation protein                 | 0.09                                                                               | 0.95833 | -1.14                                                                               | 0.01326 | -1.09                                                                               | 0.02219 |
| STM3145         | hybE      | putative hydrogenase                                     | -1.30                                                                              | 0.07223 | -1.13                                                                               | 0.01552 | -1.50                                                                               | 0.00234 |
| STM3145         | hybE      | putative hydrogenase                                     | -1.18                                                                              | 0.04517 | -1.63                                                                               | 0.00171 | -1.96                                                                               | 0.00308 |
| STM3146         | hybD      | putative hydrogenase-2 processing element                | -1.23                                                                              | 0.03088 | -0.80                                                                               | 0.02258 | -1.50                                                                               | 0.06175 |
| STM3146         | hybD      | putative hydrogenase-2 processing element                | -0.72                                                                              | 0.24680 | -1.16                                                                               | 0.00910 | -1.20                                                                               | 0.08851 |
| STM3147         | hybC      | hydrogenase-2 large subunit                              | -0.15                                                                              | 0.77479 | -1.51                                                                               | 0.00157 | -0.87                                                                               | 0.35541 |
| STM3147         | hybC      | hydrogenase-2 large subunit                              | -0.34                                                                              | 0.54425 | -1.49                                                                               | 0.00250 | -0.23                                                                               | 0.72522 |
| STM3148         | hybB      | putative chaperone                                       | 0.00                                                                               | 0.99687 | -0.68                                                                               | 0.06274 | -0.76                                                                               | 0.04912 |
| STM3148         | hybB      | putative chaperone                                       | 0.45                                                                               | 0.30002 | -0.96                                                                               | 0.03657 | 0.06                                                                                | 0.92925 |
| STM3149         | hybA      | putative hydrogenase-2 component                         | -0.71                                                                              | 0.13387 | -0.81                                                                               | 0.08483 | -1.42                                                                               | 0.00415 |
| STM3149         | hybA      | putative hydrogenase-2 component                         | -0.68                                                                              | 0.66289 | -0.81                                                                               | 0.03205 | -0.67                                                                               | 0.32113 |
| STM3150         | hypO      | putative Ni/Fe hydrogenase small subunit                 | 0.51                                                                               | 0.51519 | -1.00                                                                               | 0.02286 | -1.22                                                                               | 0.04287 |
| STM3150         | hypO      | putative Ni/Fe hydrogenase small subunit                 | 0.14                                                                               | 0.76412 | -1.30                                                                               | 0.00958 | -0.46                                                                               | 0.32650 |
| STM3151         | yghW      | putative cytoplasmic protein                             | -1.98                                                                              | 0.00825 | -2.34                                                                               | 0.01701 | -1.84                                                                               | 0.04653 |
| STM3151         | yghW      | putative cytoplasmic protein                             | -2.00                                                                              | 0.01104 | -1.31                                                                               | 0.00882 | -2.01                                                                               | 0.01356 |
| STM3152         | STM3152   | putative methyl-accepting chemotaxis protein             | -2.36                                                                              | 0.00694 | -2.51                                                                               | 0.00172 | -1.71                                                                               | 0.00549 |
| STM3152         | STM3152   | putative methyl-accepting chemotaxis protein             | -1.82                                                                              | 0.01275 | -3.02                                                                               | 0.00008 | -1.99                                                                               | 0.04098 |
| STM3153         | yqhA      | hypothetical protein STM3153                             | -1.52                                                                              | 0.01496 | -0.65                                                                               | 0.09372 | -1.27                                                                               | 0.08475 |
| STM3153         | yqhA      | hypothetical protein STM3153                             | -0.75                                                                              | 0.24608 | -0.54                                                                               | 0.09583 | -1.24                                                                               | 0.02134 |
| STM3154         | STM3154   | putative ATP-dependent RNA helicase-like protein         | -0.63                                                                              | 0.49544 | 0.16                                                                                | 0.57666 | -1.18                                                                               | 0.01114 |
| STM3154         | STM3154   | putative ATP-dependent RNA helicase-like protein         | 0.34                                                                               | 0.61745 | 0.37                                                                                | 0.18646 | -0.25                                                                               | 0.61170 |
| STM3155         | STM3155   | putative cytoplasmic protein                             | 1.24                                                                               | 0.04691 | -0.11                                                                               | 0.83656 | 1.18                                                                                | 0.02696 |
| STM3155         | STM3155   | putative cytoplasmic protein                             | 1.83                                                                               | 0.02124 | -1.21                                                                               | 0.01405 | 0.78                                                                                | 0.28735 |
| STM3156         | STM3156   | putative cytoplasmic protein                             | -0.84                                                                              | 0.11528 | -1.31                                                                               | 0.00238 | -0.20                                                                               | 0.64032 |
| STM3156         | STM3156   | putative cytoplasmic protein                             | -0.57                                                                              | 0.23001 | -1.44                                                                               | 0.00379 | 0.39                                                                                | 0.38168 |
| STM3157         | yghA      | oxidoreductase                                           | 1.10                                                                               | 0.10156 | 0.11                                                                                | 0.73817 | 1.62                                                                                | 0.00641 |
| STM3157         | yghA      | oxidoreductase                                           | 1.50                                                                               | 0.03038 | 0.32                                                                                | 0.40847 | 1.99                                                                                | 0.00155 |
| STM3158         | exbD      | energy transduction protein                              | -1.53                                                                              | 0.07209 | 0.94                                                                                | 0.00790 | 0.02                                                                                | 0.97431 |
| STM3158         | exbD      | energy transduction protein                              | 0.02                                                                               | 0.97707 | 0.76                                                                                | 0.02988 | 0.44                                                                                | 0.26670 |
| STM3159         | exbB      | energy transduction protein                              | -0.68                                                                              | 0.14494 | 1.04                                                                                | 0.00793 | -1.67                                                                               | 0.00361 |
| STM3159         | exbB      | energy transduction protein                              | 0.44                                                                               | 0.53036 | 1.50                                                                                | 0.00225 | -1.18                                                                               | 0.02477 |
| STM3160         | STM3160   | putative inner membrane protein                          | -1.01                                                                              | 0.04986 | 0.59                                                                                | 0.07663 | 0.99                                                                                | 0.02618 |
| STM3160         | STM3160   | putative inner membrane protein                          | -0.80                                                                              | 0.10063 | 0.70                                                                                | 0.02749 | -0.64                                                                               | 0.18019 |
| STM3161         | metC      | cystathionine beta-lyase                                 | -0.32                                                                              | 0.52587 | 0.05                                                                                | 0.88634 | -0.66                                                                               | 0.07383 |
| STM3161         | metC      | cystathionine beta-lyase                                 | 0.49                                                                               | 0.47667 | 0.11                                                                                | 0.80391 | 0.68                                                                                | 0.12503 |
| STM3162         | yghB      | hypothetical protein STM3162                             | 0.62                                                                               | 0.65614 | 0.36                                                                                | 0.20665 | -0.45                                                                               | 0.38422 |
| STM3162         | yghB      | hypothetical protein STM3162                             | 0.89                                                                               | 0.06739 | -0.17                                                                               | 0.55336 | -0.25                                                                               | 0.56047 |
| STM3163         | yqhC      | putative transcriptional regulator                       | 0.86                                                                               | 0.26183 | 0.13                                                                                | 0.70884 | 0.06                                                                                | 0.92981 |
| STM3163         | yqhC      | putative transcriptional regulator                       | 0.52                                                                               | 0.27250 | 0.62                                                                                | 0.07806 | -0.58                                                                               | 0.15256 |
| STM3164         | yqhD      | putative alcohol dehydrogenase                           | -1.13                                                                              | 0.04718 | -1.16                                                                               | 0.00940 | -0.70                                                                               | 0.09275 |
| STM3164         | yqhD      | putative alcohol dehydrogenase                           | -0.36                                                                              | 0.50560 | -1.52                                                                               | 0.00095 | 0.59                                                                                | 0.10738 |
| STM3165         | yqhE      | 2,5-diketo-D-gluconate reductase A                       | -0.38                                                                              | 0.41720 | -0.44                                                                               | 0.17603 | 1.14                                                                                | 0.00961 |
| STM3165         | yqhE      | 2,5-diketo-D-gluconate reductase A                       | -0.14                                                                              | 0.76966 | -1.12                                                                               | 0.14161 | 2.17                                                                                | 0.00129 |
| STM3166,S       | STM3166,S | putative cation transporter                              | 0.17                                                                               | 0.84418 | -1.51                                                                               | 0.02186 | -0.42                                                                               | 0.48230 |
| STM3166,S       | STM3166,S | putative cation transporter                              | 0.96                                                                               | 0.06850 | -0.45                                                                               | 0.22248 | 0.31                                                                                | 0.42747 |
| STM3167         | STM3167   | putative diadenosine tetraphosphate hydrolase            | -0.28                                                                              | 0.65674 | 0.47                                                                                | 0.32679 | -0.56                                                                               | 0.35807 |
| STM3167         | STM3167   | putative diadenosine tetraphosphate hydrolase            | 0.34                                                                               | 0.77034 | 0.57                                                                                | 0.11518 | 0.65                                                                                | 0.24596 |
| STM3168         | ygiR      | hypothetical protein STM3168                             | -1.43                                                                              | 0.10241 | -2.20                                                                               | 0.00107 | -1.27                                                                               | 0.08607 |
| STM3168         | ygiR      | hypothetical protein STM3168                             | -0.33                                                                              | 0.64949 | -3.95                                                                               | 0.00019 | -1.57                                                                               | 0.08096 |
| STM3169         | STM3169   | putative periplasmic dicarboxylate-binding protein       | -0.81                                                                              | 0.23420 | -0.64                                                                               | 0.24824 | -0.47                                                                               | 0.42388 |
| STM3169         | STM3169   | putative periplasmic dicarboxylate-binding protein       | 0.82                                                                               | 0.15801 | -0.11                                                                               | 0.79566 | 1.64                                                                                | 0.00571 |
| STM3170         | STM3170   | putative inner membrane protein                          | 0.77                                                                               | 0.48579 | -0.78                                                                               | 0.06175 | 0.75                                                                                | 0.46889 |
| STM3170         | STM3170   | putative inner membrane protein                          | 3.02                                                                               | 0.01546 | -0.64                                                                               | 0.08366 | 1.37                                                                                | 0.17531 |
| STM3171         | ygiK      | putative transporter                                     | -0.33                                                                              | 0.47552 | -1.22                                                                               | 0.00355 | 0.02                                                                                | 0.96049 |
| STM3171         | ygiK      | putative transporter                                     | 0.03                                                                               | 0.96628 | -1.21                                                                               | 0.00561 | 0.14                                                                                | 0.81388 |

**Table S2.** Genome-wide expression of *Salmonella enterica* serovar Typhimurium inside fibroblasts

|                 |         |                                                         | Intracellular WT<br>24 h p.i.                                                      |         | Intracellular <i>phoP</i><br>24 h p.i.                                              |         | Extracellular WT<br>stationary phase                                                |         |
|-----------------|---------|---------------------------------------------------------|------------------------------------------------------------------------------------|---------|-------------------------------------------------------------------------------------|---------|-------------------------------------------------------------------------------------|---------|
|                 |         |                                                         | Relative to WT<br>exponential LB                                                   |         | Relative to <i>phoP</i><br>exponential LB                                           |         | Relative to WT<br>exponential LB                                                    |         |
|                 |         |                                                         |  |         |  |         |  |         |
| Systematic name | Gene    | Product                                                 | log2Ratio (M)                                                                      | p value | log2Ratio (M)                                                                       | p value | log2Ratio (M)                                                                       | p value |
| STM3172         | sufI    | suppressor of ftsI                                      | -1.20                                                                              | 0.03417 | -0.88                                                                               | 0.02061 | -1.56                                                                               | 0.00219 |
| STM3172         | sufI    | suppressor of ftsI                                      | -0.67                                                                              | 0.16236 | -0.65                                                                               | 0.09673 | -1.46                                                                               | 0.00572 |
| STM3173         | plsC    | 1-acyl-sn-glycerol-3-phosphate acyltransferase          | 0.77                                                                               | 0.18366 | -0.98                                                                               | 0.01328 | 0.29                                                                                | 0.58065 |
| STM3173         | plsC    | 1-acyl-sn-glycerol-3-phosphate acyltransferase          | 0.72                                                                               | 0.19152 | -0.72                                                                               | 0.13481 | 0.45                                                                                | 0.20440 |
| STM3174         | parC    | DNA topoisomerase IV subunit A                          | -3.12                                                                              | 0.00541 | -2.19                                                                               | 0.00013 | -2.96                                                                               | 0.00370 |
| STM3174         | parC    | DNA topoisomerase IV subunit A                          | -0.94                                                                              | 0.06146 | -1.60                                                                               | 0.00665 | -2.56                                                                               | 0.00018 |
| STM3175         | STM3175 | putative regulatory protein                             | -0.42                                                                              | 0.57498 | -1.26                                                                               | 0.00325 | -1.40                                                                               | 0.00724 |
| STM3175         | STM3175 | putative regulatory protein                             | 0.01                                                                               | 0.99163 | -0.97                                                                               | 0.01183 | -1.55                                                                               | 0.00737 |
| STM3176         | ygiW    | putative outer membrane protein                         | -0.69                                                                              | 0.43457 | 0.40                                                                                | 0.17043 | 0.08                                                                                | 0.84348 |
| STM3176         | ygiW    | putative outer membrane protein                         | -0.66                                                                              | 0.54930 | 0.09                                                                                | 0.80184 | 0.68                                                                                | 0.11389 |
| STM3177         | ygiX    | putative transcriptional regulator                      | -0.81                                                                              | 0.27101 | -0.38                                                                               | 0.25997 | 0.16                                                                                | 0.78781 |
| STM3177         | ygiX    | putative transcriptional regulator                      | -1.49                                                                              | 0.12384 | -0.75                                                                               | 0.06148 | -1.21                                                                               | 0.15116 |
| STM3178         | ygiY    | putative sensor histidine kinase                        | -1.11                                                                              | 0.11230 | 0.26                                                                                | 0.46308 | 0.14                                                                                | 0.81045 |
| STM3178         | ygiY    | putative sensor histidine kinase                        | 0.36                                                                               | 0.40214 | -0.36                                                                               | 0.29368 | -0.04                                                                               | 0.93507 |
| STM3179         | mdaB    | NADPH-specific quinone oxidoreductase                   | -2.22                                                                              | 0.01348 | -0.13                                                                               | 0.69378 | -1.00                                                                               | 0.02689 |
| STM3179         | mdaB    | NADPH-specific quinone oxidoreductase                   | -2.18                                                                              | 0.00876 | -0.82                                                                               | 0.02008 | -0.32                                                                               | 0.48084 |
| STM3180         | ygiN    | putative cytoplasmic protein                            | -1.35                                                                              | 0.04605 | -0.34                                                                               | 0.40080 | -1.46                                                                               | 0.02630 |
| STM3180         | ygiN    | putative cytoplasmic protein                            | -0.26                                                                              | 0.61848 | -0.42                                                                               | 0.22949 | -2.36                                                                               | 0.05706 |
| STM3181         | parE    | DNA topoisomerase IV subunit B                          | -1.08                                                                              | 0.06236 | -0.85                                                                               | 0.02981 | -1.37                                                                               | 0.06464 |
| STM3181         | parE    | DNA topoisomerase IV subunit B                          | 0.42                                                                               | 0.46541 | -0.73                                                                               | 0.03166 | -0.65                                                                               | 0.16686 |
| STM3182         | yqiA    | putative esterase                                       | -2.25                                                                              | 0.00884 | -0.71                                                                               | 0.05932 | -1.68                                                                               | 0.00476 |
| STM3182         | yqiA    | putative esterase                                       | -1.63                                                                              | 0.01572 | -0.60                                                                               | 0.08787 | -1.88                                                                               | 0.00673 |
| STM3183         | icc     | cyclic 3',5'-adenosine monophosphate phosphodiesterase  | -2.01                                                                              | 0.01083 | -0.62                                                                               | 0.12402 | -3.15                                                                               | 0.00014 |
| STM3183         | icc     | cyclic 3',5'-adenosine monophosphate phosphodiesterase  | -1.98                                                                              | 0.01835 | -0.74                                                                               | 0.06740 | -2.75                                                                               | 0.10925 |
| STM3184         | yqiB    | putative cytoplasmic protein                            | -1.92                                                                              | 0.01266 | -0.15                                                                               | 0.61522 | -0.82                                                                               | 0.17890 |
| STM3184         | yqiB    | putative cytoplasmic protein                            | -0.48                                                                              | 0.41696 | 0.22                                                                                | 0.54396 | -1.15                                                                               | 0.01906 |
| STM3185         | yqiE    | ADP-ribose pyrophosphatase                              | -0.29                                                                              | 0.62664 | -0.10                                                                               | 0.81517 | -1.22                                                                               | 0.02854 |
| STM3185         | yqiE    | ADP-ribose pyrophosphatase                              | 0.17                                                                               | 0.79451 | 0.16                                                                                | 0.63784 | -0.10                                                                               | 0.87445 |
| STM3186         | tolC    | outer membrane channel precursor protein                | 0.77                                                                               | 0.62495 | 0.00                                                                                | 0.99871 | -0.40                                                                               | 0.34361 |
| STM3186         | tolC    | outer membrane channel precursor protein                | 0.89                                                                               | 0.41890 | 0.43                                                                                | 0.22843 | -0.44                                                                               | 0.20795 |
| STM3187         | ygiB    | putative inner membrane protein                         | -2.71                                                                              | 0.01186 | 0.21                                                                                | 0.51090 | 0.35                                                                                | 0.35207 |
| STM3187         | ygiB    | putative inner membrane protein                         | -1.12                                                                              | 0.07232 | -0.06                                                                               | 0.85643 | 0.84                                                                                | 0.04553 |
| STM3188         | ygiC    | putative glutathionylspermidine synthase                | -0.64                                                                              | 0.17299 | 0.08                                                                                | 0.80911 | -0.57                                                                               | 0.13782 |
| STM3188         | ygiC    | putative glutathionylspermidine synthase                | 1.18                                                                               | 0.04933 | 0.21                                                                                | 0.55292 | 0.93                                                                                | 0.16687 |
| STM3189         | ygiD    | putative cytoplasmic protein                            | 0.77                                                                               | 0.17366 | 0.47                                                                                | 0.14165 | 0.50                                                                                | 0.18434 |
| STM3189         | ygiD    | putative cytoplasmic protein                            | 1.11                                                                               | 0.11348 | -0.31                                                                               | 0.60931 | 1.16                                                                                | 0.01934 |
| STM3190         | ygiE    | zinc transporter ZupT                                   | -0.88                                                                              | 0.16362 | 0.18                                                                                | 0.57229 | -0.82                                                                               | 0.03886 |
| STM3190         | ygiE    | zinc transporter ZupT                                   | 0.66                                                                               | 0.39131 | 0.33                                                                                | 0.32309 | 0.08                                                                                | 0.85148 |
| STM3191         | STM3191 | putative arylsulfate sulfotransferase                   | 0.60                                                                               | 0.21730 | 0.44                                                                                | 0.25895 | 0.17                                                                                | 0.76819 |
| STM3191         | STM3191 | putative arylsulfate sulfotransferase                   | 2.33                                                                               | 0.01536 | 0.24                                                                                | 0.41746 | 0.13                                                                                | 0.88341 |
| STM3193         | STM3193 | putative disulfide bond formation protein               | -0.64                                                                              | 0.14485 | 0.50                                                                                | 0.14681 | 0.47                                                                                | 0.34784 |
| STM3193         | STM3193 | putative disulfide bond formation protein               | 0.19                                                                               | 0.91091 | -0.24                                                                               | 0.46635 | 0.59                                                                                | 0.22776 |
| STM3194         | STM3194 | putative disulfide oxidoreductase                       | -0.66                                                                              | 0.25631 | -1.03                                                                               | 0.02677 | -1.10                                                                               | 0.03331 |
| STM3194         | STM3194 | putative disulfide oxidoreductase                       | 0.20                                                                               | 0.80928 | -1.04                                                                               | 0.01597 | 1.52                                                                                | 0.05741 |
| STM3195         | ribB    | 3,4-dihydroxy-2-butanone 4-phosphate synthase           | -0.98                                                                              | 0.08236 | -0.14                                                                               | 0.70316 | 0.46                                                                                | 0.33776 |
| STM3195         | ribB    | 3,4-dihydroxy-2-butanone 4-phosphate synthase           | -1.23                                                                              | 0.05179 | -0.48                                                                               | 0.16673 | 0.25                                                                                | 0.78851 |
| STM3196,S       | yqiC    | putative cytoplasmic protein                            | 0.53                                                                               | 0.76383 | 0.93                                                                                | 0.05037 | -0.04                                                                               | 0.95069 |
| STM3196,S       | yqiC    | putative cytoplasmic protein                            | 1.68                                                                               | 0.30019 | 0.71                                                                                | 0.02857 | 1.20                                                                                | 0.03347 |
| STM3197         | glgS    | glycogen synthesis protein GlgS                         | -0.47                                                                              | 0.36389 | 0.05                                                                                | 0.87851 | -0.20                                                                               | 0.62892 |
| STM3197         | glgS    | glycogen synthesis protein GlgS                         | 1.74                                                                               | 0.10150 | -0.36                                                                               | 0.28431 | 1.11                                                                                | 0.01726 |
| STM3198         | STM3198 | putative inner membrane protein                         | -0.71                                                                              | 0.14009 | -0.33                                                                               | 0.40080 | -1.07                                                                               | 0.02693 |
| STM3198         | STM3198 | putative inner membrane protein                         | 1.16                                                                               | 0.03295 | -0.92                                                                               | 0.13103 | 1.10                                                                                | 0.02626 |
| STM3199         | yqiK    | hypothetical protein STM3199                            | -2.23                                                                              | 0.02407 | -0.76                                                                               | 0.02064 | -0.93                                                                               | 0.03749 |
| STM3199         | yqiK    | hypothetical protein STM3199                            | -1.70                                                                              | 0.13359 | -0.78                                                                               | 0.03020 | -1.37                                                                               | 0.01702 |
| STM3200         | rfaE    | putative ADP-L-glycero-D-manno-heptose synthase         | -0.91                                                                              | 0.06069 | -0.59                                                                               | 0.06749 | -0.62                                                                               | 0.30659 |
| STM3200         | rfaE    | putative ADP-L-glycero-D-manno-heptose synthase         | -1.16                                                                              | 0.06618 | -1.03                                                                               | 0.00591 | -0.96                                                                               | 0.05277 |
| STM3201         | glnE    | adenylyl transferase for glutamine synthetase           | -1.46                                                                              | 0.14543 | -1.04                                                                               | 0.02410 | -1.38                                                                               | 0.02765 |
| STM3201         | glnE    | adenylyl transferase for glutamine synthetase           | -1.16                                                                              | 0.17459 | -1.02                                                                               | 0.02041 | -1.51                                                                               | 0.00654 |
| STM3202         | ygiF    | putative cytoplasmic protein                            | -1.22                                                                              | 0.04979 | -0.68                                                                               | 0.05562 | -1.43                                                                               | 0.01957 |
| STM3202         | ygiF    | putative cytoplasmic protein                            | 1.30                                                                               | 0.08166 | -1.01                                                                               | 0.01012 | -0.40                                                                               | 0.30309 |
| STM3203         | ygiM    | hypothetical protein STM3203                            | 0.51                                                                               | 0.22891 | 0.48                                                                                | 0.17025 | -1.31                                                                               | 0.00536 |
| STM3203         | ygiM    | hypothetical protein STM3203                            | 0.89                                                                               | 0.10248 | 0.18                                                                                | 0.53139 | -0.52                                                                               | 0.27866 |
| STM3204         | cca     | tRNA nucleotidyl transferase                            | -0.44                                                                              | 0.40706 | -0.18                                                                               | 0.81645 | -0.23                                                                               | 0.71037 |
| STM3204         | cca     | tRNA nucleotidyl transferase                            | -0.33                                                                              | 0.53333 | -0.26                                                                               | 0.34046 | -0.39                                                                               | 0.34770 |
| STM3205         | uppP    | undecaprenyl pyrophosphate phosphatase                  | 0.05                                                                               | 0.94799 | -0.50                                                                               | 0.24548 | -0.09                                                                               | 0.87188 |
| STM3205         | uppP    | undecaprenyl pyrophosphate phosphatase                  | 0.56                                                                               | 0.37183 | -0.70                                                                               | 0.17343 | 0.76                                                                                | 0.57927 |
| STM3206         | folB    | dihydroneopterin aldolase/dihydroneopterin triphosphate | -0.70                                                                              | 0.15969 | -1.28                                                                               | 0.00258 | -1.29                                                                               | 0.01107 |
| STM3206         | folB    | dihydroneopterin aldolase/dihydroneopterin triphosphate | 0.09                                                                               | 0.85581 | -1.10                                                                               | 0.00802 | -2.19                                                                               | 0.00040 |
| STM3207         | ygiH    | hypothetical protein STM3207                            | -0.32                                                                              | 0.68193 | 0.09                                                                                | 0.77806 | 1.10                                                                                | 0.01356 |
| STM3207         | ygiH    | hypothetical protein STM3207                            | 0.44                                                                               | 0.43987 | -0.23                                                                               | 0.39124 | 1.15                                                                                | 0.01243 |

**Table S2.** Genome-wide expression of *Salmonella enterica* serovar Typhimurium inside fibroblasts

|                 |         |                                                       | Intracellular WT<br>24 h p.i.                                                      |         | Intracellular <i>phoP</i><br>24 h p.i.                                              |         | Extracellular WT<br>stationary phase                                                |         |
|-----------------|---------|-------------------------------------------------------|------------------------------------------------------------------------------------|---------|-------------------------------------------------------------------------------------|---------|-------------------------------------------------------------------------------------|---------|
|                 |         |                                                       | Relative to WT<br>exponential LB                                                   |         | Relative to <i>phoP</i><br>exponential LB                                           |         | Relative to WT<br>exponential LB                                                    |         |
|                 |         |                                                       |  |         |  |         |  |         |
| Systematic name | Gene    | Product                                               | log2Ratio (M)                                                                      | p value | log2Ratio (M)                                                                       | p value | log2Ratio (M)                                                                       | p value |
| STM3208         | gcp     | putative O-sialoglycoprotein endopeptidase            | -0.83                                                                              | 0.30712 | -0.60                                                                               | 0.09770 | -1.40                                                                               | 0.00692 |
| STM3208         | gcp     | putative O-sialoglycoprotein endopeptidase            | 0.10                                                                               | 0.92458 | -0.98                                                                               | 0.00839 | 0.61                                                                                | 0.21007 |
| STM3209         | rpsU    | 30S ribosomal protein S21                             | -3.12                                                                              | 0.00884 | -1.11                                                                               | 0.01920 | -4.13                                                                               | 0.00009 |
| STM3209         | rpsU    | 30S ribosomal protein S21                             | -2.41                                                                              | 0.00753 | -1.15                                                                               | 0.00609 | -3.91                                                                               | 0.00009 |
| STM3210         | dnaG    | DNA primase                                           | -0.76                                                                              | 0.09268 | -0.33                                                                               | 0.36977 | -1.04                                                                               | 0.01984 |
| STM3210         | dnaG    | DNA primase                                           | -0.35                                                                              | 0.51894 | 0.25                                                                                | 0.40003 | -0.53                                                                               | 0.28459 |
| STM3211,S       | rpoD    | RNA polymerase sigma factor                           | -0.21                                                                              | 0.63074 | 0.61                                                                                | 0.08780 | -0.85                                                                               | 0.05027 |
| STM3211,S       | rpoD    | RNA polymerase sigma factor                           | 0.49                                                                               | 0.34050 | 0.81                                                                                | 0.03092 | -0.31                                                                               | 0.46166 |
| STM3212         | mug     | G/U mismatch-specific DNA glycosylase                 | 0.22                                                                               | 0.78992 | 0.74                                                                                | 0.02430 | 1.49                                                                                | 0.00564 |
| STM3212         | mug     | G/U mismatch-specific DNA glycosylase                 | 0.35                                                                               | 0.51087 | 0.87                                                                                | 0.01329 | 1.23                                                                                | 0.00574 |
| STM3213         | ileX    | STM3213                                               | -0.51                                                                              | 0.36065 | -1.14                                                                               | 0.00536 | 0.60                                                                                | 0.36955 |
| STM3213         | ileX    | STM3213                                               | -1.10                                                                              | 0.36108 | -1.08                                                                               | 0.00437 | 0.72                                                                                | 0.31519 |
| STM3214         | yqjH    | putative transporter                                  | -1.00                                                                              | 0.05595 | -0.15                                                                               | 0.67352 | -0.83                                                                               | 0.04129 |
| STM3214         | yqjH    | putative transporter                                  | -0.01                                                                              | 0.97919 | -0.19                                                                               | 0.51012 | 0.03                                                                                | 0.96438 |
| STM3215         | yqjI    | putative transcriptional regulator                    | -0.94                                                                              | 0.06553 | -1.44                                                                               | 0.00239 | -2.08                                                                               | 0.00100 |
| STM3215         | yqjI    | putative transcriptional regulator                    | -0.10                                                                              | 0.89154 | -1.43                                                                               | 0.00130 | -1.56                                                                               | 0.00503 |
| STM3216         | STM3216 | putative methyl-accepting chemotaxis protein          | -1.83                                                                              | 0.07348 | -1.91                                                                               | 0.00592 | -0.39                                                                               | 0.70170 |
| STM3216         | STM3216 | putative methyl-accepting chemotaxis protein          | 2.27                                                                               | 0.28018 | -2.36                                                                               | 0.00643 | -0.18                                                                               | 0.82611 |
| STM3217         | aer     | aerotaxis sensor receptor                             | -1.60                                                                              | 0.01817 | -3.33                                                                               | 0.00102 | -2.03                                                                               | 0.00408 |
| STM3217         | aer     | aerotaxis sensor receptor                             | -1.67                                                                              | 0.03504 | -4.38                                                                               | 0.00008 | -2.61                                                                               | 0.01163 |
| STM3218         | oat     | putative acetylornithine aminotransferase             | 0.79                                                                               | 0.10559 | 0.16                                                                                | 0.58109 | 2.65                                                                                | 0.00022 |
| STM3218         | oat     | putative acetylornithine aminotransferase             | 0.05                                                                               | 0.93261 | 0.31                                                                                | 0.41220 | 2.30                                                                                | 0.00236 |
| STM3219         | fadH    | 2,4-dienyl-CoA reductase                              | -0.18                                                                              | 0.67365 | -0.42                                                                               | 0.31257 | -2.33                                                                               | 0.00266 |
| STM3219         | fadH    | 2,4-dienyl-CoA reductase                              | 0.76                                                                               | 0.30144 | -1.03                                                                               | 0.09811 | -0.65                                                                               | 0.12113 |
| STM3220         | yqjO    | putative methyltransferase                            | -0.85                                                                              | 0.07935 | -0.43                                                                               | 0.23992 | -1.14                                                                               | 0.02103 |
| STM3220         | yqjO    | putative methyltransferase                            | 0.19                                                                               | 0.64833 | -0.64                                                                               | 0.06478 | -0.51                                                                               | 0.22654 |
| STM3221         | yqjP    | putative metal-dependent hydrolase                    | -0.90                                                                              | 0.11370 | -0.85                                                                               | 0.02066 | -1.48                                                                               | 0.00593 |
| STM3221         | yqjP    | putative metal-dependent hydrolase                    | 0.50                                                                               | 0.30886 | -0.36                                                                               | 0.32375 | -0.41                                                                               | 0.25850 |
| STM3222         | yqjQ    | putative integral membrane protein                    | 0.20                                                                               | 0.67951 | -0.89                                                                               | 0.05487 | -0.60                                                                               | 0.15976 |
| STM3222         | yqjQ    | putative integral membrane protein                    | 1.63                                                                               | 0.06274 | -1.50                                                                               | 0.02645 | 0.75                                                                                | 0.28004 |
| STM3223         | yqjR    | putative dehydrogenase                                | 0.48                                                                               | 0.56791 | 0.11                                                                                | 0.73846 | -0.19                                                                               | 0.75741 |
| STM3223         | yqjR    | putative dehydrogenase                                | 1.21                                                                               | 0.11173 | 0.61                                                                                | 0.11564 | 1.74                                                                                | 0.04639 |
| STM3224         | yqjT    | putative tellurite resistance protein                 | 0.53                                                                               | 0.37920 | 3.03                                                                                | 0.00032 | 0.36                                                                                | 0.45317 |
| STM3224         | yqjT    | putative tellurite resistance protein                 | 0.29                                                                               | 0.71798 | 3.02                                                                                | 0.00021 | 1.27                                                                                | 0.03328 |
| STM3225         | yqjU    | putative dicarboxylate permease                       | -0.69                                                                              | 0.14762 | 0.16                                                                                | 0.59904 | -0.01                                                                               | 0.98279 |
| STM3225         | yqjU    | putative dicarboxylate permease                       | -0.96                                                                              | 0.08229 | 0.71                                                                                | 0.03130 | -0.02                                                                               | 0.97030 |
| STM3226         | yqjA    | hypothetical protein STM3226                          | -1.03                                                                              | 0.27496 | -1.21                                                                               | 0.00560 | -1.28                                                                               | 0.01123 |
| STM3226         | yqjA    | hypothetical protein STM3226                          | 0.89                                                                               | 0.29339 | -1.22                                                                               | 0.00873 | -0.36                                                                               | 0.40198 |
| STM3227         | yqjB    | putative outer membrane protein                       | -1.25                                                                              | 0.03392 | -0.11                                                                               | 0.79139 | -0.13                                                                               | 0.77101 |
| STM3227         | yqjB    | putative outer membrane protein                       | 0.18                                                                               | 0.78824 | -0.36                                                                               | 0.18816 | 0.47                                                                                | 0.20093 |
| STM3228         | yqjC    | putative periplasmic protein                          | 0.65                                                                               | 0.15162 | 2.00                                                                                | 0.00082 | 3.55                                                                                | 0.00009 |
| STM3228         | yqjC    | putative periplasmic protein                          | 0.91                                                                               | 0.16124 | 2.01                                                                                | 0.00028 | 4.17                                                                                | 0.00016 |
| STM3229         | yqjD    | putative inner membrane protein                       | -0.68                                                                              | 0.26249 | 2.11                                                                                | 0.00032 | 1.15                                                                                | 0.02265 |
| STM3229         | yqjD    | putative inner membrane protein                       | 0.41                                                                               | 0.63739 | 2.14                                                                                | 0.00055 | 1.95                                                                                | 0.00139 |
| STM3230         | yqjE    | putative inner membrane protein                       | -1.43                                                                              | 0.02585 | 2.14                                                                                | 0.00017 | 0.22                                                                                | 0.54971 |
| STM3230         | yqjE    | putative inner membrane protein                       | -0.81                                                                              | 0.20026 | 2.46                                                                                | 0.00024 | 0.91                                                                                | 0.09228 |
| STM3231         | yqjK    | putative inner membrane protein                       | -0.94                                                                              | 0.09874 | 2.47                                                                                | 0.00036 | 0.53                                                                                | 0.20093 |
| STM3231         | yqjK    | putative inner membrane protein                       | -0.32                                                                              | 0.58374 | 2.75                                                                                | 0.00011 | 0.42                                                                                | 0.25525 |
| STM3232         | yqjF    | hypothetical protein STM3232                          | -0.43                                                                              | 0.53986 | 0.12                                                                                | 0.67735 | 0.27                                                                                | 0.51836 |
| STM3232         | yqjF    | hypothetical protein STM3232                          | 3.40                                                                               | 0.02501 | -0.10                                                                               | 0.76817 | 1.69                                                                                | 0.02423 |
| STM3233         | yqjG    | putative glutathione S-transferase                    | 0.07                                                                               | 0.87342 | 0.24                                                                                | 0.57107 | 1.15                                                                                | 0.02967 |
| STM3233         | yqjG    | putative glutathione S-transferase                    | -0.32                                                                              | 0.54856 | -0.27                                                                               | 0.35311 | 1.39                                                                                | 0.00625 |
| STM3234         | yhaH    | putative inner membrane protein                       | -1.34                                                                              | 0.05566 | -0.35                                                                               | 0.71583 | -0.44                                                                               | 0.36546 |
| STM3234         | yhaH    | putative inner membrane protein                       | -0.51                                                                              | 0.34022 | -0.68                                                                               | 0.03640 | -1.03                                                                               | 0.03005 |
| STM3235         | yhaJ    | putative transcriptional regulator                    | -0.42                                                                              | 0.46152 | 0.98                                                                                | 0.01594 | 0.46                                                                                | 0.55272 |
| STM3235         | yhaJ    | putative transcriptional regulator                    | 0.76                                                                               | 0.15238 | 0.73                                                                                | 0.02104 | 0.32                                                                                | 0.45236 |
| STM3236         | yhaK    | putative cytoplasmic protein                          | 0.27                                                                               | 0.78455 | -0.11                                                                               | 0.78140 | -0.67                                                                               | 0.17263 |
| STM3236         | yhaK    | putative cytoplasmic protein                          | 0.89                                                                               | 0.17766 | 0.15                                                                                | 0.72482 | 0.33                                                                                | 0.57927 |
| STM3237         | yhaL    | putative cytoplasmic protein                          | 1.99                                                                               | 0.02436 | 0.13                                                                                | 0.74425 | 0.97                                                                                | 0.04335 |
| STM3237         | yhaL    | putative cytoplasmic protein                          | 2.05                                                                               | 0.01972 | -0.07                                                                               | 0.89974 | 1.62                                                                                | 0.01132 |
| STM3238         | yhaN    | putative inner membrane protein                       | -0.44                                                                              | 0.29238 | 0.03                                                                                | 0.93550 | -1.02                                                                               | 0.04685 |
| STM3238         | yhaN    | putative inner membrane protein                       | -0.17                                                                              | 0.72602 | -0.48                                                                               | 0.12844 | -0.66                                                                               | 0.33018 |
| STM3239         | yhaO    | putative transport protein                            | -0.94                                                                              | 0.11453 | -0.76                                                                               | 0.08038 | -1.42                                                                               | 0.01278 |
| STM3239         | yhaO    | putative transport protein                            | 1.63                                                                               | 0.08799 | -1.24                                                                               | 0.00387 | 0.38                                                                                | 0.38502 |
| STM3240         | tdcG    | L-serine deaminase                                    | -0.32                                                                              | 0.65088 | -1.30                                                                               | 0.00999 | -0.36                                                                               | 0.54635 |
| STM3240         | tdcG    | L-serine deaminase                                    | 1.45                                                                               | 0.21947 | -1.27                                                                               | 0.00946 | -1.25                                                                               | 0.06798 |
| STM3241         | tdcE    | pyruvate formate-lyase 4/2-ketobutyrate formate-lyase | -1.12                                                                              | 0.07186 | -0.75                                                                               | 0.17278 | -0.20                                                                               | 0.80590 |
| STM3241         | tdcE    | pyruvate formate-lyase 4/2-ketobutyrate formate-lyase | -0.26                                                                              | 0.86747 | -0.88                                                                               | 0.01938 | 0.12                                                                                | 0.84076 |
| STM3242         | tdcD    | acetate/propionate kinase                             | 0.36                                                                               | 0.41018 | -1.13                                                                               | 0.02837 | 0.11                                                                                | 0.85828 |
| STM3242         | tdcD    | acetate/propionate kinase                             | 1.00                                                                               | 0.11259 | -0.53                                                                               | 0.23101 | 0.26                                                                                | 0.68588 |

**Table S2.** Genome-wide expression of *Salmonella enterica* serovar Typhimurium inside fibroblasts

|                 |         |                                                         | Intracellular WT<br>24 h p.i.                                                      |         | Intracellular <i>phoP</i><br>24 h p.i.                                              |         | Extracellular WT<br>stationary phase                                                |         |
|-----------------|---------|---------------------------------------------------------|------------------------------------------------------------------------------------|---------|-------------------------------------------------------------------------------------|---------|-------------------------------------------------------------------------------------|---------|
|                 |         |                                                         | Relative to WT<br>exponential LB                                                   |         | Relative to <i>phoP</i><br>exponential LB                                           |         | Relative to WT<br>exponential LB                                                    |         |
|                 |         |                                                         |  |         |  |         |  |         |
| Systematic name | Gene    | Product                                                 | log2Ratio (M)                                                                      | p value | log2Ratio (M)                                                                       | p value | log2Ratio (M)                                                                       | p value |
| STM3243         | tdcC    | L-threonine/L-serine permease                           | 0.59                                                                               | 0.62738 | -0.17                                                                               | 0.78795 | 0.91                                                                                | 0.19341 |
| STM3243         | tdcC    | L-threonine/L-serine permease                           | 0.67                                                                               | 0.33831 | 0.16                                                                                | 0.75820 | 0.06                                                                                | 0.96274 |
| STM3244         | tdcB    | threonine dehydratase                                   | 0.32                                                                               | 0.46345 | -0.06                                                                               | 0.86983 | 0.11                                                                                | 0.77399 |
| STM3244         | tdcB    | threonine dehydratase                                   | 1.10                                                                               | 0.12655 | -0.36                                                                               | 0.65756 | -0.11                                                                               | 0.90484 |
| STM3245         | tdcA    | transcriptional activator                               | -0.35                                                                              | 0.63432 | -1.59                                                                               | 0.00471 | -1.15                                                                               | 0.04696 |
| STM3245         | tdcA    | transcriptional activator                               | 1.05                                                                               | 0.06769 | -0.58                                                                               | 0.47619 | 0.07                                                                                | 0.94781 |
| STM3247         | garK    | glycerate kinase                                        | 0.53                                                                               | 0.28930 | 1.49                                                                                | 0.00462 | -1.12                                                                               | 0.02578 |
| STM3247         | garK    | glycerate kinase                                        | 1.99                                                                               | 0.05111 | 1.83                                                                                | 0.00107 | -0.52                                                                               | 0.35691 |
| STM3248         | garR    | tartronate semialdehyde reductase                       | -0.46                                                                              | 0.38661 | 0.12                                                                                | 0.75024 | -0.34                                                                               | 0.56192 |
| STM3248         | garR    | tartronate semialdehyde reductase                       | 0.63                                                                               | 0.28849 | 0.13                                                                                | 0.74871 | -0.83                                                                               | 0.11534 |
| STM3249         | garL    | 2-dehydro-3-deoxy-galactarate aldolase                  | 0.04                                                                               | 0.95007 | 0.33                                                                                | 0.51268 | -0.83                                                                               | 0.17935 |
| STM3249         | garL    | 2-dehydro-3-deoxy-galactarate aldolase                  | 0.65                                                                               | 0.41986 | 0.30                                                                                | 0.36784 | 0.35                                                                                | 0.47513 |
| STM3250         | garD    | galactarate dehydrogenase                               | -0.72                                                                              | 0.33270 | -0.28                                                                               | 0.53854 | -0.95                                                                               | 0.16372 |
| STM3250         | garD    | galactarate dehydrogenase                               | 1.57                                                                               | 0.14815 | -0.34                                                                               | 0.43019 | 0.20                                                                                | 0.78965 |
| STM3251         | STM3251 | putative sugar kinase                                   | -0.79                                                                              | 0.16262 | 0.16                                                                                | 0.72305 | -0.40                                                                               | 0.62936 |
| STM3251         | STM3251 | putative sugar kinase                                   | 0.78                                                                               | 0.14187 | -0.66                                                                               | 0.05485 | 0.09                                                                                | 0.80705 |
| STM3252         | agaR    | Aga operon transcriptional repressor                    | 0.12                                                                               | 0.80365 | 0.14                                                                                | 0.70514 | 2.06                                                                                | 0.05619 |
| STM3252         | agaR    | Aga operon transcriptional repressor                    | 0.67                                                                               | 0.46472 | 0.00                                                                                | 0.99819 | 1.90                                                                                | 0.12440 |
| STM3253         | STM3253 | tagatose 1,6-diphosphate aldolase                       | 1.68                                                                               | 0.03376 | 1.10                                                                                | 0.01969 | 1.75                                                                                | 0.06260 |
| STM3253         | STM3253 | tagatose 1,6-diphosphate aldolase                       | 2.53                                                                               | 0.01106 | 0.02                                                                                | 0.94974 | 2.46                                                                                | 0.00168 |
| STM3254         | STM3254 | putative fructose-1-phosphate kinase                    | -0.39                                                                              | 0.49422 | -1.13                                                                               | 0.01899 | -0.60                                                                               | 0.19949 |
| STM3254         | STM3254 | putative fructose-1-phosphate kinase                    | 0.62                                                                               | 0.32051 | -0.16                                                                               | 0.63957 | 0.13                                                                                | 0.73869 |
| STM3255         | STM3255 | putative phosphotransferase system fructose-specific    | 0.66                                                                               | 0.34178 | 1.60                                                                                | 0.00239 | 0.25                                                                                | 0.64232 |
| STM3255         | STM3255 | putative phosphotransferase system fructose-specific    | 1.88                                                                               | 0.12411 | -0.35                                                                               | 0.58424 | 0.31                                                                                | 0.51115 |
| STM3256         | STM3256 | putative phosphotransferase system mannitol/fructose-   | 3.34                                                                               | 0.14914 | -0.31                                                                               | 0.76008 | 2.09                                                                                | 0.05757 |
| STM3256         | STM3256 | putative phosphotransferase system mannitol/fructose-   | 1.54                                                                               | 0.09032 | -0.61                                                                               | 0.14612 | 0.98                                                                                | 0.54459 |
| STM3257         | STM3257 | putative tagatose 6-phosphate kinase 1                  | -1.59                                                                              | 0.02435 | 0.51                                                                                | 0.55810 | -0.42                                                                               | 0.54228 |
| STM3257         | STM3257 | putative tagatose 6-phosphate kinase 1                  | 0.17                                                                               | 0.81981 | -1.24                                                                               | 0.01678 | -0.58                                                                               | 0.20197 |
| STM3258         | STM3258 | galactitol-specific enzyme IIA                          | 0.52                                                                               | 0.25925 | 0.21                                                                                | 0.74069 | -0.42                                                                               | 0.27648 |
| STM3258         | STM3258 | galactitol-specific enzyme IIA                          | 1.46                                                                               | 0.36682 | -1.45                                                                               | 0.02479 | -1.36                                                                               | 0.04605 |
| STM3259         | STM3259 | PTS family galactitol-specific enzyme IIB               | -0.01                                                                              | 0.98200 | 0.20                                                                                | 0.54466 | 1.20                                                                                | 0.01665 |
| STM3259         | STM3259 | PTS family galactitol-specific enzyme IIB               | -0.08                                                                              | 0.87342 | -0.30                                                                               | 0.53218 | 0.93                                                                                | 0.04242 |
| STM3260         | STM3260 | PTS family galactitol-specific enzyme IIC               | 0.06                                                                               | 0.92640 | -0.72                                                                               | 0.10687 | 0.35                                                                                | 0.39744 |
| STM3260         | STM3260 | PTS family galactitol-specific enzyme IIC               | -0.64                                                                              | 0.46897 | -1.50                                                                               | 0.01968 | 0.49                                                                                | 0.46025 |
| STM3261         | STM3261 | galactitol-1-phosphate dehydrogenase                    | -1.24                                                                              | 0.30190 | -0.80                                                                               | 0.11600 | -1.02                                                                               | 0.13879 |
| STM3261         | STM3261 | galactitol-1-phosphate dehydrogenase                    | 1.83                                                                               | 0.09954 | -0.36                                                                               | 0.32281 | -0.65                                                                               | 0.42685 |
| STM3262         | STM3262 | galactitol utilization operon transcriptional repressor | 0.11                                                                               | 0.87796 | -0.37                                                                               | 0.31257 | 0.97                                                                                | 0.05242 |
| STM3262         | STM3262 | galactitol utilization operon transcriptional repressor | 0.60                                                                               | 0.38660 | -0.39                                                                               | 0.27622 | 0.68                                                                                | 0.50355 |
| STM3263         | yraL    | putative methyltransferase                              | 0.23                                                                               | 0.66772 | -0.39                                                                               | 0.27797 | 0.14                                                                                | 0.89115 |
| STM3263         | yraL    | putative methyltransferase                              | 1.38                                                                               | 0.03284 | -0.40                                                                               | 0.37767 | 0.00                                                                                | 0.99379 |
| STM3264         | yraM    | putative transglycosylase                               | -1.37                                                                              | 0.05579 | -0.23                                                                               | 0.47184 | -1.71                                                                               | 0.00638 |
| STM3264         | yraM    | putative transglycosylase                               | -0.24                                                                              | 0.78589 | -0.58                                                                               | 0.17868 | -0.91                                                                               | 0.09526 |
| STM3265         | yraN    | hypothetical protein STM3265                            | -1.48                                                                              | 0.01858 | 0.01                                                                                | 0.97466 | -1.32                                                                               | 0.00537 |
| STM3265         | yraN    | hypothetical protein STM3265                            | -0.63                                                                              | 0.37572 | -0.50                                                                               | 0.14450 | -0.64                                                                               | 0.19142 |
| STM3266         | yraO    | putative phosphoheptose isomerase                       | -0.60                                                                              | 0.25480 | -0.24                                                                               | 0.45133 | -1.47                                                                               | 0.00683 |
| STM3266         | yraO    | putative phosphoheptose isomerase                       | 0.53                                                                               | 0.22043 | 0.11                                                                                | 0.70134 | 0.08                                                                                | 0.82353 |
| STM3267         | yraP    | putative periplasmic protein                            | -0.10                                                                              | 0.82172 | -0.19                                                                               | 0.60338 | -0.79                                                                               | 0.04207 |
| STM3267         | yraP    | putative periplasmic protein                            | 0.43                                                                               | 0.43573 | -0.05                                                                               | 0.86456 | -0.24                                                                               | 0.60259 |
| STM3268         | yraR    | putative nucleoside-diphosphate-sugar epimerase         | -0.33                                                                              | 0.67298 | 0.07                                                                                | 0.85159 | 0.89                                                                                | 0.21737 |
| STM3268         | yraR    | putative nucleoside-diphosphate-sugar epimerase         | 0.54                                                                               | 0.27378 | 0.47                                                                                | 0.22393 | 0.71                                                                                | 0.07520 |
| STM3269         | yhbO    | putative intracellular proteinase                       | -0.51                                                                              | 0.28433 | 0.03                                                                                | 0.94131 | 1.50                                                                                | 0.00518 |
| STM3269         | yhbO    | putative intracellular proteinase                       | 0.54                                                                               | 0.34628 | 0.56                                                                                | 0.09242 | 2.37                                                                                | 0.00197 |
| STM3270         | yhbP    | hypothetical protein STM3270                            | 0.06                                                                               | 0.92872 | 0.45                                                                                | 0.26657 | 1.39                                                                                | 0.00521 |
| STM3270         | yhbP    | hypothetical protein STM3270                            | 0.91                                                                               | 0.11315 | 0.38                                                                                | 0.26788 | 2.14                                                                                | 0.00084 |
| STM3271         | yhbQ    | hypothetical protein STM3271                            | -1.01                                                                              | 0.05873 | -0.15                                                                               | 0.67224 | -0.30                                                                               | 0.45089 |
| STM3271         | yhbQ    | hypothetical protein STM3271                            | -0.94                                                                              | 0.06515 | -0.59                                                                               | 0.15041 | -1.21                                                                               | 0.01612 |
| STM3272         | yhbS    | putative transport protein                              | -0.96                                                                              | 0.23558 | -0.86                                                                               | 0.01198 | -1.39                                                                               | 0.01345 |
| STM3272         | yhbS    | putative transport protein                              | -0.63                                                                              | 0.51958 | -1.10                                                                               | 0.02258 | -0.81                                                                               | 0.26354 |
| STM3273         | yhbT    | putative lipid carrier protein                          | -0.84                                                                              | 0.18180 | 0.53                                                                                | 0.12848 | 0.54                                                                                | 0.14887 |
| STM3273         | yhbT    | putative lipid carrier protein                          | -0.86                                                                              | 0.15039 | -0.04                                                                               | 0.90488 | 0.07                                                                                | 0.85525 |
| STM3274         | yhbU    | putative protease                                       | -0.86                                                                              | 0.25205 | -0.83                                                                               | 0.03646 | -0.44                                                                               | 0.36411 |
| STM3274         | yhbU    | putative protease                                       | -0.12                                                                              | 0.77958 | -1.77                                                                               | 0.00309 | -0.23                                                                               | 0.59627 |
| STM3275,S       | yhbV    | putative protease                                       | 0.32                                                                               | 0.48347 | -0.51                                                                               | 0.09309 | -0.79                                                                               | 0.26020 |
| STM3275,S       | yhbV    | putative protease                                       | 0.20                                                                               | 0.78300 | -2.11                                                                               | 0.00409 | 0.92                                                                                | 0.03567 |
| STM3276         | yhbW    | putative alkanal monooxygenase                          | -0.73                                                                              | 0.18812 | -0.46                                                                               | 0.15628 | 0.53                                                                                | 0.19103 |
| STM3276         | yhbW    | putative alkanal monooxygenase                          | 0.28                                                                               | 0.51104 | 0.30                                                                                | 0.45381 | 0.98                                                                                | 0.03871 |
| STM3277         | STM3277 | putative inner membrane protein                         | 0.61                                                                               | 0.29137 | 1.26                                                                                | 0.03035 | 0.44                                                                                | 0.34171 |
| STM3277         | STM3277 | putative inner membrane protein                         | 1.21                                                                               | 0.04221 | -0.40                                                                               | 0.50510 | 1.46                                                                                | 0.02428 |
| STM3278         | STM3278 | putative cytoplasmic protein                            | -1.08                                                                              | 0.06471 | -0.32                                                                               | 0.33639 | -0.38                                                                               | 0.39346 |
| STM3278         | STM3278 | putative cytoplasmic protein                            | 0.17                                                                               | 0.88749 | 0.23                                                                                | 0.61617 | 0.12                                                                                | 0.83480 |

**Table S2.** Genome-wide expression of *Salmonella enterica* serovar Typhimurium inside fibroblasts

| Systematic name | Gene    | Product                                           | log2Ratio (M) | p value | log2Ratio (M) | p value | log2Ratio (M) | p value |
|-----------------|---------|---------------------------------------------------|---------------|---------|---------------|---------|---------------|---------|
| STM3279         | mtr     | tryptophan-specific transport protein             | -0.65         | 0.18348 | -0.18         | 0.57576 | -0.50         | 0.47498 |
| STM3279         | mtr     | tryptophan-specific transport protein             | 0.55          | 0.27080 | -0.15         | 0.65735 | -0.13         | 0.85656 |
| STM3280,S       | deaD    | cysteine sulfinatase desulfinate                  | -0.35         | 0.51990 | 0.96          | 0.08756 | -1.65         | 0.00812 |
| STM3280,S       | deaD    | cysteine sulfinatase desulfinate                  | -1.01         | 0.10236 | 0.14          | 0.78618 | -1.29         | 0.02277 |
| STM3281         | nlpl    | lipoprotein                                       | -1.70         | 0.03038 | 0.33          | 0.29919 | -2.98         | 0.00022 |
| STM3281         | nlpl    | lipoprotein                                       | 1.46          | 0.03950 | 0.87          | 0.02076 | -2.98         | 0.00169 |
| STM3282         | pnp     | polynucleotide phosphorylase                      | 0.43          | 0.41267 | -1.28         | 0.00518 | -0.23         | 0.84247 |
| STM3282         | pnp     | polynucleotide phosphorylase                      | -1.48         | 0.37922 | -1.38         | 0.00644 | -0.16         | 0.90846 |
| STM3283         | rpsO    | 30S ribosomal protein S15                         | -2.42         | 0.02363 | -0.68         | 0.10095 | -2.25         | 0.00075 |
| STM3283         | rpsO    | 30S ribosomal protein S15                         | -2.67         | 0.05615 | -0.47         | 0.20794 | -4.64         | 0.00047 |
| STM3284         | truB    | tRNA pseudouridine synthase B                     | -1.49         | 0.04046 | -0.05         | 0.92605 | -2.85         | 0.00014 |
| STM3284         | truB    | tRNA pseudouridine synthase B                     | -0.92         | 0.08124 | 0.05          | 0.92338 | -2.32         | 0.00058 |
| STM3285         | rbfA    | ribosome-binding factor A                         | -2.14         | 0.05741 | -0.77         | 0.04138 | -2.43         | 0.00027 |
| STM3285         | rbfA    | ribosome-binding factor A                         | -1.10         | 0.37241 | -1.12         | 0.00573 | -1.57         | 0.00449 |
| STM3286         | infB    | translation initiation factor IF-2                | -1.50         | 0.07268 | -0.11         | 0.81565 | -2.24         | 0.00493 |
| STM3286         | infB    | translation initiation factor IF-2                | -0.64         | 0.15577 | -0.01         | 0.97889 | -1.56         | 0.09553 |
| STM3287         | nusA    | transcription elongation factor NusA              | -1.07         | 0.07031 | -0.78         | 0.06402 | -3.66         | 0.00064 |
| STM3287         | nusA    | transcription elongation factor NusA              | -0.31         | 0.63051 | -0.61         | 0.12468 | -4.03         | 0.00025 |
| STM3288         | yhbC    | hypothetical protein STM3288                      | -1.94         | 0.15195 | -0.67         | 0.09737 | 0.42          | 0.24990 |
| STM3288         | yhbC    | hypothetical protein STM3288                      | 1.45          | 0.47667 | -1.62         | 0.00799 | 0.08          | 0.87004 |
| STM3289         | metY    | STM3289                                           | 1.50          | 0.06416 | 1.06          | 0.00812 | 4.22          | 0.00004 |
| STM3289         | metY    | STM3289                                           | 2.35          | 0.01298 | 1.10          | 0.00833 | 4.42          | 0.00006 |
| STM3290,S       | argG    | argininosuccinate synthase                        | -0.98         | 0.13555 | -0.14         | 0.67681 | -0.99         | 0.08531 |
| STM3290,S       | argG    | argininosuccinate synthase                        | 0.23          | 0.60713 | -0.14         | 0.66320 | 0.68          | 0.34515 |
| STM3291         | STM3291 | putative cytoplasmic protein                      | -0.45         | 0.33541 | -0.37         | 0.19553 | -0.17         | 0.69375 |
| STM3291         | STM3291 | putative cytoplasmic protein                      | -0.05         | 0.94734 | -0.44         | 0.33246 | 0.97          | 0.03607 |
| STM3292         | leuU    | STM3292                                           | -1.58         | 0.01380 | -0.83         | 0.34390 | -0.87         | 0.07042 |
| STM3292         | leuU    | STM3292                                           | -2.24         | 0.00869 | -1.33         | 0.00550 | -1.02         | 0.02284 |
| STM3293         | secG    | protein-export membrane protein                   | -1.70         | 0.02449 | -0.88         | 0.03435 | -2.52         | 0.00073 |
| STM3293         | secG    | protein-export membrane protein                   | -1.19         | 0.02903 | -0.72         | 0.04149 | -1.96         | 0.00190 |
| STM3294         | mrsA    | phosphoglucosamine mutase                         | -2.68         | 0.01134 | -1.18         | 0.00483 | -2.86         | 0.00030 |
| STM3294         | mrsA    | phosphoglucosamine mutase                         | -0.92         | 0.10662 | -1.40         | 0.00234 | -2.44         | 0.00022 |
| STM3295         | folP    | 7,8-dihydropteroate synthase                      | -0.11         | 0.81330 | -0.98         | 0.01011 | -1.77         | 0.00383 |
| STM3295         | folP    | 7,8-dihydropteroate synthase                      | 0.35          | 0.56489 | -0.92         | 0.00955 | -1.31         | 0.00697 |
| STM3296         | hflB    | ATP-dependent zinc-metallo protease               | -0.93         | 0.18123 | -0.08         | 0.82326 | -1.68         | 0.01025 |
| STM3296         | hflB    | ATP-dependent zinc-metallo protease               | -0.51         | 0.49059 | 0.85          | 0.02899 | -1.15         | 0.03449 |
| STM3297         | ftsJ    | 23S rRNA methyltransferase                        | -2.10         | 0.02655 | 0.01          | 0.98739 | -2.02         | 0.00097 |
| STM3297         | ftsJ    | 23S rRNA methyltransferase                        | -2.00         | 0.03444 | 0.23          | 0.44559 | -2.03         | 0.00064 |
| STM3298,S       | yhbY    | putative RNA-binding protein                      | -1.49         | 0.01588 | 0.59          | 0.06270 | -2.70         | 0.00022 |
| STM3298,S       | yhbY    | putative RNA-binding protein                      | -0.73         | 0.22891 | 0.22          | 0.60308 | -2.22         | 0.00248 |
| STM3299         | greA    | transcription elongation factor GreA              | -2.13         | 0.00918 | -0.21         | 0.57075 | -2.22         | 0.00661 |
| STM3299         | greA    | transcription elongation factor GreA              | -0.84         | 0.09820 | 0.31          | 0.34347 | -2.19         | 0.00048 |
| STM3300         | dacB    | D-alanyl-D-alanine carboxypeptidase               | -1.34         | 0.04246 | -0.13         | 0.66693 | -1.25         | 0.01361 |
| STM3300         | dacB    | D-alanyl-D-alanine carboxypeptidase               | 0.72          | 0.34597 | 0.05          | 0.87217 | 0.21          | 0.60525 |
| STM3301         | yhbZ    | putative GTP-binding protein                      | 0.66          | 0.28273 | 0.66          | 0.08234 | 0.45          | 0.30860 |
| STM3301         | yhbZ    | putative GTP-binding protein                      | 1.47          | 0.01989 | 0.74          | 0.03418 | 1.50          | 0.01034 |
| STM3303         | rpmA    | 50S ribosomal protein L27                         | -2.68         | 0.07992 | -0.37         | 0.27846 | -3.90         | 0.00035 |
| STM3303         | rpmA    | 50S ribosomal protein L27                         | -1.72         | 0.07343 | -0.19         | 0.66385 | -3.06         | 0.00010 |
| STM3303         | rpmA    | 50S ribosomal protein L27                         | -1.48         | 0.06597 | -0.61         | 0.06483 | -3.60         | 0.00016 |
| STM3303         | rpmA    | 50S ribosomal protein L27                         | -1.29         | 0.10651 | -0.31         | 0.28918 | -3.01         | 0.00014 |
| STM3305         | ispB    | octaprenyl diphosphate synthase                   | -1.27         | 0.04025 | -0.67         | 0.07165 | -2.98         | 0.00186 |
| STM3305         | ispB    | octaprenyl diphosphate synthase                   | 0.86          | 0.55316 | -0.66         | 0.03421 | -2.49         | 0.00053 |
| STM3306         | nlp     | transcriptional regulator                         | -0.02         | 0.96628 | -0.62         | 0.06010 | -0.73         | 0.17836 |
| STM3306         | nlp     | transcriptional regulator                         | 0.89          | 0.10535 | -0.83         | 0.02378 | 0.18          | 0.64347 |
| STM3307         | murA    | UDP-N-acetylglucosamine 1-carboxyvinyltransferase | -1.90         | 0.00991 | -1.31         | 0.00427 | -3.83         | 0.00004 |
| STM3307         | murA    | UDP-N-acetylglucosamine 1-carboxyvinyltransferase | -1.32         | 0.02693 | -1.40         | 0.00447 | -3.48         | 0.00011 |
| STM3308         | yrbA    | putative transcriptional regulator                | -1.96         | 0.01782 | -1.43         | 0.00350 | -2.45         | 0.00146 |
| STM3308         | yrbA    | putative transcriptional regulator                | -1.50         | 0.03368 | -1.29         | 0.00435 | -2.72         | 0.00035 |
| STM3308         | yrbA    | putative transcriptional regulator                | -1.21         | 0.07678 | -1.21         | 0.00613 | -3.21         | 0.00011 |
| STM3308         | yrbA    | putative transcriptional regulator                | -1.92         | 0.06959 | -1.76         | 0.00055 | -3.13         | 0.00008 |
| STM3309         | yrbB    | hypothetical protein STM3309                      | -1.82         | 0.01091 | -0.31         | 0.34597 | -2.11         | 0.00066 |
| STM3309         | yrbB    | hypothetical protein STM3309                      | -0.95         | 0.06500 | -0.43         | 0.19431 | -1.46         | 0.00527 |
| STM3310         | yrbC    | putative transport protein                        | -1.63         | 0.01536 | 0.24          | 0.48187 | -0.87         | 0.08773 |
| STM3310         | yrbC    | putative transport protein                        | -0.65         | 0.13367 | 0.75          | 0.02820 | -0.65         | 0.07454 |
| STM3311         | yrbD    | putative transport protein                        | -0.85         | 0.09691 | -0.01         | 0.97904 | -0.59         | 0.12180 |
| STM3311         | yrbD    | putative transport protein                        | -0.48         | 0.30390 | -0.16         | 0.71564 | 0.17          | 0.64347 |
| STM3312         | yrbE    | putative transport protein                        | -1.05         | 0.07464 | -0.53         | 0.39179 | -1.19         | 0.06414 |
| STM3312         | yrbE    | putative transport protein                        | -1.91         | 0.01120 | -1.31         | 0.00448 | -2.22         | 0.01208 |
| STM3313         | yrbF    | putative transport protein                        | -1.76         | 0.01136 | -1.65         | 0.00099 | -2.65         | 0.00527 |
| STM3313         | yrbF    | putative transport protein                        | -1.51         | 0.03020 | -1.42         | 0.00268 | -3.17         | 0.00184 |

**Table S2.** Genome-wide expression of *Salmonella enterica* serovar Typhimurium inside fibroblasts

Intracellular WT 24 h p.i.      Intracellular *phoP* 24 h p.i.      Extracellular WT stationary phase

Relative to WT exponential LB      Relative to *phoP* exponential LB      Relative to WT exponential LB



| Systematic name | Gene    | Product                                                    | log2Ratio (M) | p value | log2Ratio (M) | p value | log2Ratio (M) | p value |
|-----------------|---------|------------------------------------------------------------|---------------|---------|---------------|---------|---------------|---------|
| STM3314         | yrbG    | Na/Ca transport protein                                    | -2.33         | 0.00660 | -1.14         | 0.00610 | -2.95         | 0.00024 |
| STM3314         | yrbG    | Na/Ca transport protein                                    | -1.64         | 0.04587 | -1.25         | 0.00644 | -2.52         | 0.00187 |
| STM3315         | yrbH    | putative sugar phosphate isomerase                         | -1.90         | 0.01155 | -1.23         | 0.00590 | -2.53         | 0.00074 |
| STM3315         | yrbH    | putative sugar phosphate isomerase                         | -1.08         | 0.08755 | -1.03         | 0.00650 | -1.73         | 0.01327 |
| STM3316         | yrbI    | 3-deoxy-D-manno-octulosonate 8-phosphate phosphatase       | -1.93         | 0.01435 | -0.44         | 0.32824 | -1.18         | 0.01458 |
| STM3316         | yrbI    | 3-deoxy-D-manno-octulosonate 8-phosphate phosphatase       | -0.82         | 0.17650 | -0.55         | 0.12647 | -0.41         | 0.22957 |
| STM3317         | yrbK    | putative inner membrane protein                            | -2.13         | 0.01205 | 0.38          | 0.75558 | -1.34         | 0.01206 |
| STM3317         | yrbK    | putative inner membrane protein                            | -1.69         | 0.06312 | -0.76         | 0.02704 | -1.03         | 0.06367 |
| STM3318         | yhbN    | putative transport protein                                 | -0.85         | 0.08090 | -0.21         | 0.51185 | -1.13         | 0.01202 |
| STM3318         | yhbN    | putative transport protein                                 | -0.56         | 0.65685 | -0.97         | 0.01546 | -0.56         | 0.18143 |
| STM3319         | yhbG    | putative transport protein                                 | -1.78         | 0.02080 | -0.18         | 0.62701 | -1.84         | 0.00156 |
| STM3319         | yhbG    | putative transport protein                                 | -1.37         | 0.02992 | -0.34         | 0.33927 | -1.34         | 0.02020 |
| STM3320         | rpoN    | DNA-directed RNA polymerase subunit N                      | -1.58         | 0.08661 | 0.74          | 0.05812 | -0.63         | 0.17933 |
| STM3320         | rpoN    | DNA-directed RNA polymerase subunit N                      | 0.72          | 0.17687 | 1.22          | 0.01031 | 0.46          | 0.39311 |
| STM3321         | yhbH    | putative sigma N modulation factor                         | -1.46         | 0.05169 | 1.03          | 0.00466 | -0.31         | 0.41184 |
| STM3321         | yhbH    | putative sigma N modulation factor                         | -0.66         | 0.21775 | 1.00          | 0.02306 | 0.41          | 0.36645 |
| STM3322         | ptsN    | sugar-specific PTS family enzyme IIA                       | -0.74         | 0.20339 | -0.26         | 0.54630 | 1.23          | 0.00833 |
| STM3322         | ptsN    | sugar-specific PTS family enzyme IIA                       | -1.66         | 0.02423 | 0.30          | 0.33639 | 0.93          | 0.03074 |
| STM3323         | yhbJ    | hypothetical protein STM3323                               | -1.99         | 0.00956 | -0.92         | 0.01725 | -1.41         | 0.00541 |
| STM3323         | yhbJ    | hypothetical protein STM3323                               | -1.56         | 0.04243 | -0.64         | 0.06225 | -0.62         | 0.27329 |
| STM3324         | ptsO    | phosphocarrier protein HPr-like NPr                        | -1.66         | 0.07261 | -1.70         | 0.00218 | -1.34         | 0.03801 |
| STM3324         | ptsO    | phosphocarrier protein HPr-like NPr                        | -1.30         | 0.02655 | -1.68         | 0.00065 | -1.10         | 0.02158 |
| STM3325         | yrbL    | putative cytoplasmic protein                               | -1.06         | 0.09643 | -0.56         | 0.29806 | 0.93          | 0.07295 |
| STM3325         | yrbL    | putative cytoplasmic protein                               | -1.11         | 0.07329 | -1.23         | 0.01373 | 1.44          | 0.01034 |
| STM3326         | mtgA    | monofunctional biosynthetic peptidoglycan transglycosylase | -1.56         | 0.01970 | -1.35         | 0.13891 | 0.05          | 0.89601 |
| STM3326         | mtgA    | monofunctional biosynthetic peptidoglycan transglycosylase | -1.21         | 0.12158 | -0.93         | 0.01800 | -0.29         | 0.50589 |
| STM3327         | yhbL    | sigma cross-reacting protein 27A                           | -1.21         | 0.17567 | -0.76         | 0.03484 | -2.27         | 0.00038 |
| STM3327         | yhbL    | sigma cross-reacting protein 27A                           | -0.18         | 0.84760 | -1.02         | 0.00534 | -1.60         | 0.00236 |
| STM3328         | arcB    | sensory histidine kinase                                   | 0.05          | 0.98038 | -0.76         | 0.04023 | 0.71          | 0.52736 |
| STM3328         | arcB    | sensory histidine kinase                                   | 2.29          | 0.19540 | -1.71         | 0.00048 | 1.03          | 0.16471 |
| STM3329         | yhcC    | putative FeS oxidoreductase                                | -0.06         | 0.88959 | -1.27         | 0.02151 | -1.30         | 0.05515 |
| STM3329         | yhcC    | putative FeS oxidoreductase                                | 1.36          | 0.02883 | -0.07         | 0.81313 | 0.18          | 0.75552 |
| STM3330         | gltB    | glutamate synthase large subunit                           | -1.41         | 0.02415 | -0.57         | 0.18458 | -2.11         | 0.00122 |
| STM3330         | gltB    | glutamate synthase large subunit                           | 0.31          | 0.74962 | -0.56         | 0.08958 | -0.86         | 0.12472 |
| STM3331         | gltD    | glutamate synthase small subunit                           | -0.53         | 0.30879 | -1.17         | 0.02064 | -1.40         | 0.01819 |
| STM3331         | gltD    | glutamate synthase small subunit                           | 0.68          | 0.20353 | -1.01         | 0.04687 | -0.92         | 0.11313 |
| STM3332         | yhcG    | putative cytoplasmic protein                               | -0.74         | 0.27541 | 1.00          | 0.01195 | -1.05         | 0.06604 |
| STM3332         | yhcG    | putative cytoplasmic protein                               | 0.12          | 0.77174 | -0.26         | 0.51756 | 2.33          | 0.09870 |
| STM3333         | STM3333 | putative purine-cytosine permease                          | -1.40         | 0.03916 | -0.04         | 0.92605 | -1.99         | 0.00496 |
| STM3333         | STM3333 | putative purine-cytosine permease                          | -0.07         | 0.96214 | 0.07          | 0.86576 | -1.46         | 0.00863 |
| STM3334         | STM3334 | cytosine deaminase                                         | 0.41          | 0.65448 | 0.08          | 0.83023 | -0.64         | 0.13338 |
| STM3334         | STM3334 | cytosine deaminase                                         | 1.42          | 0.13961 | 0.13          | 0.69749 | -0.18         | 0.77376 |
| STM3335         | yhcH    | putative cytoplasmic protein                               | 0.77          | 0.34092 | 0.57          | 0.15184 | -0.05         | 0.94453 |
| STM3335         | yhcH    | putative cytoplasmic protein                               | 1.11          | 0.05377 | -0.37         | 0.43103 | 0.03          | 0.96352 |
| STM3336         | nanK    | N-acetylmannosamine kinase                                 | 0.27          | 0.69114 | 0.63          | 0.06324 | 1.38          | 0.03354 |
| STM3336         | nanK    | N-acetylmannosamine kinase                                 | -1.03         | 0.30135 | 0.33          | 0.29169 | 1.08          | 0.03003 |
| STM3337         | nanE    | putative ManNAc-6P epimerase                               | 3.01          | 0.31521 | 0.41          | 0.38963 | 1.04          | 0.15608 |
| STM3337         | nanE    | putative ManNAc-6P epimerase                               | 1.93          | 0.25113 | 0.49          | 0.18868 | 1.51          | 0.04042 |
| STM3338         | nanT    | putative sialic acid transporter                           | 0.60          | 0.25202 | 0.76          | 0.07704 | 0.97          | 0.02131 |
| STM3338         | nanT    | putative sialic acid transporter                           | 1.04          | 0.08960 | 0.68          | 0.05873 | 1.62          | 0.03327 |
| STM3339         | nanA    | N-acetylneuraminate lyase                                  | -0.76         | 0.15567 | 0.48          | 0.22512 | 1.14          | 0.03666 |
| STM3339         | nanA    | N-acetylneuraminate lyase                                  | 0.64          | 0.37031 | 0.18          | 0.76022 | 1.26          | 0.00591 |
| STM3340         | yhcK    | transcriptional regulator NanR                             | 3.57          | 0.09429 | -0.42         | 0.25618 | 1.31          | 0.01416 |
| STM3340         | yhcK    | transcriptional regulator NanR                             | 1.61          | 0.04403 | -0.26         | 0.43103 | 1.83          | 0.04675 |
| STM3341         | sspB    | stringent starvation protein B                             | -0.67         | 0.37872 | -0.22         | 0.50209 | -2.53         | 0.00026 |
| STM3341         | sspB    | stringent starvation protein B                             | -0.05         | 0.93053 | -0.47         | 0.10951 | -1.11         | 0.02977 |
| STM3342         | sspA    | stringent starvation protein A                             | -2.14         | 0.00929 | -1.41         | 0.00190 | -2.48         | 0.00028 |
| STM3342         | sspA    | stringent starvation protein A                             | -1.93         | 0.00886 | -1.78         | 0.00039 | -2.28         | 0.00079 |
| STM3343         | STM3343 | putative cytoplasmic protein                               | 0.16          | 0.76786 | -1.29         | 0.00710 | -1.37         | 0.06674 |
| STM3343         | STM3343 | putative cytoplasmic protein                               | 0.67          | 0.29999 | -0.90         | 0.01247 | -1.48         | 0.00482 |
| STM3344         | rpsI    | 30S ribosomal protein S9                                   | -1.10         | 0.06060 | -1.14         | 0.10806 | -1.19         | 0.02689 |
| STM3344         | rpsI    | 30S ribosomal protein S9                                   | -1.16         | 0.03788 | -1.05         | 0.01323 | -1.34         | 0.03769 |
| STM3345         | rplM    | 50S ribosomal protein L13                                  | -0.70         | 0.27024 | -0.35         | 0.29748 | -3.82         | 0.00007 |
| STM3345         | rplM    | 50S ribosomal protein L13                                  | -0.02         | 0.97228 | -0.94         | 0.03280 | -2.56         | 0.00560 |
| STM3346         | yhcM    | putative ATPase                                            | -3.41         | 0.00661 | -1.72         | 0.00145 | -3.97         | 0.00022 |
| STM3346         | yhcM    | putative ATPase                                            | -2.27         | 0.01762 | -1.44         | 0.00694 | -3.14         | 0.00022 |
| STM3347         | yhcB    | putative periplasmic protein                               | -1.12         | 0.04229 | -0.16         | 0.61713 | -2.28         | 0.00053 |
| STM3347         | yhcB    | putative periplasmic protein                               | -1.20         | 0.02888 | -0.20         | 0.54383 | -1.59         | 0.01141 |
| STM3348         | degQ    | serine endoprotease                                        | -1.45         | 0.02320 | -0.23         | 0.47066 | -1.03         | 0.01573 |
| STM3348         | degQ    | serine endoprotease                                        | -0.41         | 0.45069 | -0.31         | 0.50017 | -0.69         | 0.11163 |

**Table S2.** Genome-wide expression of *Salmonella enterica* serovar Typhimurium inside fibroblasts

Intracellular WT 24 h p.i.      Intracellular *phoP* 24 h p.i.      Extracellular WT stationary phase

Relative to WT exponential LB      Relative to *phoP* exponential LB      Relative to WT exponential LB



| Systematic name | Gene    | Product                                                  | log2Ratio (M) | p value | log2Ratio (M) | p value | log2Ratio (M) | p value |
|-----------------|---------|----------------------------------------------------------|---------------|---------|---------------|---------|---------------|---------|
| STM3349         | degS    | periplasmic serine endoprotease                          | 0.58          | 0.58858 | -0.76         | 0.06184 | -0.44         | 0.52228 |
| STM3349         | degS    | periplasmic serine endoprotease                          | 1.06          | 0.09097 | -1.26         | 0.00630 | -0.31         | 0.54067 |
| STM3350         | STM3350 | putative inner membrane protein                          | -1.05         | 0.05466 | -1.32         | 0.00306 | -1.93         | 0.01540 |
| STM3350         | STM3350 | putative inner membrane protein                          | 0.48          | 0.29330 | -0.85         | 0.03228 | 0.29          | 0.53425 |
| STM3351         | oadB    | putative sodium ion pump oxaloacetate decarboxylase beta | 1.62          | 0.12602 | 0.72          | 0.52995 | -0.09         | 0.89495 |
| STM3351         | oadB    | putative sodium ion pump oxaloacetate decarboxylase beta | 1.67          | 0.27954 | -0.12         | 0.71994 | -0.33         | 0.46990 |
| STM3352         | oadA    | oxaloacetate decarboxylase                               | 0.49          | 0.71993 | -0.60         | 0.36290 | 0.86          | 0.46716 |
| STM3352         | oadA    | oxaloacetate decarboxylase                               | 1.05          | 0.30366 | 0.38          | 0.40758 | 0.01          | 0.99365 |
| STM3352         | oadA    | oxaloacetate decarboxylase                               | 1.92          | 0.09167 | 0.11          | 0.83578 | 0.79          | 0.06524 |
| STM3352         | oadA    | oxaloacetate decarboxylase                               | 1.69          | 0.22352 | 0.01          | 0.98967 | 0.39          | 0.49753 |
| STM3352         | oadA    | oxaloacetate decarboxylase                               | 2.56          | 0.09231 | -0.01         | 0.98010 | 0.95          | 0.02625 |
| STM3352         | oadA    | oxaloacetate decarboxylase                               | 3.00          | 0.05810 | -0.58         | 0.09836 | 1.56          | 0.01917 |
| STM3353         | oadG    | putative oxaloacetate decarboxylase subunit gamma        | 1.00          | 0.11849 | -0.29         | 0.36059 | 1.30          | 0.00602 |
| STM3353         | oadG    | putative oxaloacetate decarboxylase subunit gamma        | 1.01          | 0.10405 | -0.79         | 0.17191 | 0.54          | 0.25124 |
| STM3354         | STM3354 | L(+)-tartrate dehydratase                                | -0.34         | 0.52834 | 0.01          | 0.98628 | 0.29          | 0.74554 |
| STM3354         | STM3354 | L(+)-tartrate dehydratase                                | 0.78          | 0.34233 | -0.52         | 0.36682 | 0.77          | 0.31828 |
| STM3355         | STM3355 | tartrate dehydratase                                     | 0.46          | 0.45778 | -0.53         | 0.16032 | 0.59          | 0.52471 |
| STM3355         | STM3355 | tartrate dehydratase                                     | 0.73          | 0.46005 | -0.83         | 0.08417 | 0.78          | 0.29951 |
| STM3356         | STM3356 | putative cation transporter                              | 0.88          | 0.34838 | -0.39         | 0.43153 | -0.17         | 0.77436 |
| STM3356         | STM3356 | putative cation transporter                              | 0.62          | 0.20111 | 1.07          | 0.46899 | 3.93          | 0.00023 |
| STM3357         | STM3357 | putative regulatory protein                              | -0.91         | 0.07367 | -0.61         | 0.26719 | 0.62          | 0.34975 |
| STM3357         | STM3357 | putative regulatory protein                              | -1.63         | 0.01885 | -1.22         | 0.01961 | -0.46         | 0.40607 |
| STM3358         | STM3358 | putative regulatory protein                              | -1.99         | 0.01067 | -0.54         | 0.15070 | -0.60         | 0.14996 |
| STM3358         | STM3358 | putative regulatory protein                              | -1.12         | 0.06385 | 0.05          | 0.90579 | -0.78         | 0.21507 |
| STM3359         | mdh     | malate dehydrogenase                                     | -2.60         | 0.00660 | 1.17          | 0.00611 | -1.78         | 0.00178 |
| STM3359         | mdh     | malate dehydrogenase                                     | -0.87         | 0.16915 | 1.09          | 0.00851 | -1.27         | 0.01553 |
| STM3360         | argR    | arginine repressor                                       | -0.01         | 0.97285 | -0.40         | 0.26025 | -1.00         | 0.03070 |
| STM3360         | argR    | arginine repressor                                       | -0.37         | 0.41619 | -0.63         | 0.15126 | -0.28         | 0.61476 |
| STM3361         | yhcN    | putative outer membrane protein                          | -0.67         | 0.17113 | -0.80         | 0.02672 | -0.83         | 0.10655 |
| STM3361         | yhcN    | putative outer membrane protein                          | 0.32          | 0.43436 | -0.79         | 0.03137 | 0.22          | 0.71804 |
| STM3362         | STM3362 | putative periplasmic protein                             | 0.29          | 0.79237 | -0.14         | 0.81481 | -0.42         | 0.29615 |
| STM3362         | STM3362 | putative periplasmic protein                             | 1.34          | 0.12988 | -0.06         | 0.83378 | 0.53          | 0.21479 |
| STM3363         | yhcO    | putative cytoplasmic protein                             | -0.25         | 0.84353 | 0.93          | 0.01867 | 2.38          | 0.01612 |
| STM3363         | yhcO    | putative cytoplasmic protein                             | 1.09          | 0.16050 | 0.49          | 0.15240 | 1.79          | 0.00187 |
| STM3364         | yhcP    | putative inner membrane protein                          | -0.32         | 0.43508 | -0.38         | 0.30994 | -0.10         | 0.79033 |
| STM3364         | yhcP    | putative inner membrane protein                          | 1.01          | 0.07220 | -0.37         | 0.20601 | 0.30          | 0.41079 |
| STM3365         | yhcQ    | putative multidrug resistance protein                    | 0.37          | 0.61648 | -0.63         | 0.13074 | -1.13         | 0.10243 |
| STM3365         | yhcQ    | putative multidrug resistance protein                    | -0.24         | 0.60402 | -0.36         | 0.31174 | -0.79         | 0.11036 |
| STM3366         | yhcR    | putative inner membrane protein                          | -1.00         | 0.10199 | -0.88         | 0.04386 | -0.54         | 0.21297 |
| STM3366         | yhcR    | putative inner membrane protein                          | -0.86         | 0.34084 | -1.24         | 0.00516 | -1.04         | 0.09953 |
| STM3367         | yhcS    | putative transcriptional regulator                       | -0.38         | 0.65121 | 0.50          | 0.30331 | 1.05          | 0.11815 |
| STM3367         | yhcS    | putative transcriptional regulator                       | -1.52         | 0.04570 | -0.68         | 0.10936 | -1.62         | 0.00331 |
| STM3368         | tldD    | microcin B17-processing protein                          | -0.39         | 0.40395 | -0.41         | 0.36283 | -0.34         | 0.59806 |
| STM3368         | tldD    | microcin B17-processing protein                          | 0.14          | 0.78409 | -0.47         | 0.15837 | -0.19         | 0.70132 |
| STM3369         | yhdP    | putative protease                                        | -0.58         | 0.41542 | -0.93         | 0.03630 | -1.32         | 0.01759 |
| STM3369         | yhdP    | putative protease                                        | 0.23          | 0.64839 | -1.37         | 0.00635 | -0.66         | 0.22262 |
| STM3370         | cafA    | RNase G                                                  | -0.79         | 0.13003 | -0.73         | 0.03050 | 0.12          | 0.80333 |
| STM3370         | cafA    | RNase G                                                  | -1.30         | 0.02567 | -1.10         | 0.00635 | 0.27          | 0.63357 |
| STM3371         | maf     | Maf-like protein                                         | -2.38         | 0.00660 | -0.98         | 0.01317 | -2.13         | 0.00188 |
| STM3371         | maf     | Maf-like protein                                         | -1.34         | 0.08658 | -0.97         | 0.00649 | -2.52         | 0.00024 |
| STM3372         | mreD    | rod shape-determining protein                            | -2.34         | 0.05421 | -1.54         | 0.00193 | -3.30         | 0.00035 |
| STM3372         | mreD    | rod shape-determining protein                            | -1.80         | 0.10017 | -2.09         | 0.00022 | -1.68         | 0.00650 |
| STM3373         | mreC    | rod shape-determining protein                            | -2.56         | 0.01417 | -2.38         | 0.00041 | -3.09         | 0.00056 |
| STM3373         | mreC    | rod shape-determining protein                            | -1.81         | 0.01575 | -2.09         | 0.00015 | -2.66         | 0.00035 |
| STM3374         | mreB    | rod shape-determining protein                            | -2.73         | 0.00720 | -2.39         | 0.00017 | -4.12         | 0.00006 |
| STM3374         | mreB    | rod shape-determining protein                            | -1.52         | 0.04277 | -2.00         | 0.00163 | -5.11         | 0.00002 |
| STM3375         | yhdA    | putative diguanylate cyclase                             | -0.73         | 0.18201 | -0.75         | 0.02860 | -1.01         | 0.04472 |
| STM3375         | yhdA    | putative diguanylate cyclase                             | -1.18         | 0.14711 | -0.94         | 0.01445 | -1.50         | 0.06013 |
| STM3376         | yhdH    | putative oxidoreductase                                  | 0.07          | 0.90441 | 0.06          | 0.87322 | -0.77         | 0.07936 |
| STM3376         | yhdH    | putative oxidoreductase                                  | -0.09         | 0.90413 | -0.26         | 0.44427 | -0.72         | 0.11398 |
| STM3377         | STM3377 | hypothetical protein STM3377                             | -1.31         | 0.08580 | -0.24         | 0.50026 | 1.19          | 0.01334 |
| STM3377         | STM3377 | hypothetical protein STM3377                             | -1.49         | 0.15336 | -0.31         | 0.28464 | 0.36          | 0.33800 |
| STM3378         | STM3378 | hypothetical protein STM3378                             | -2.43         | 0.00627 | -1.16         | 0.01910 | -0.91         | 0.03575 |
| STM3378         | STM3378 | hypothetical protein STM3378                             | -0.61         | 0.33999 | -0.93         | 0.03113 | -1.00         | 0.04082 |
| STM3379         | accB    | acetyl-CoA carboxylase                                   | -0.84         | 0.70795 | -1.81         | 0.00033 | -4.37         | 0.00007 |
| STM3379         | accB    | acetyl-CoA carboxylase                                   | -2.06         | 0.01636 | -1.12         | 0.00338 | -2.52         | 0.04027 |
| STM3380         | accC    | acetyl-CoA carboxylase                                   | -1.62         | 0.02548 | -1.14         | 0.00590 | -1.90         | 0.00935 |
| STM3380         | accC    | acetyl-CoA carboxylase                                   | -0.83         | 0.44369 | -1.64         | 0.00076 | -0.58         | 0.13937 |
| STM3381         | yhdT    | putative inner membrane protein                          | -1.58         | 0.02677 | -1.23         | 0.00297 | -2.97         | 0.00062 |
| STM3381         | yhdT    | putative inner membrane protein                          | -0.92         | 0.10669 | -1.67         | 0.00190 | -2.09         | 0.00181 |

**Table S2.** Genome-wide expression of *Salmonella enterica* serovar Typhimurium inside fibroblasts

| Systematic name | Gene    | Product                                             | log2Ratio (M) | p value | log2Ratio (M) | p value | log2Ratio (M) | p value |
|-----------------|---------|-----------------------------------------------------|---------------|---------|---------------|---------|---------------|---------|
| STM3382         | panF    | sodium/panthothenate symporter                      | -0.80         | 0.10464 | -1.80         | 0.00043 | -0.87         | 0.21154 |
| STM3382         | panF    | sodium/panthothenate symporter                      | -0.52         | 0.27065 | -1.48         | 0.00123 | 0.05          | 0.90808 |
| STM3383         | prmA    | ribosomal protein L11 methyltransferase             | -1.48         | 0.02102 | -0.73         | 0.02259 | -0.10         | 0.88656 |
| STM3383         | prmA    | ribosomal protein L11 methyltransferase             | -1.27         | 0.07006 | -1.29         | 0.00347 | -0.89         | 0.07947 |
| STM3384         | yhdG    | possible dehydrogenase                              | -3.74         | 0.00547 | -1.90         | 0.00060 | -5.82         | 0.00012 |
| STM3384         | yhdG    | possible dehydrogenase                              | -3.37         | 0.01572 | -1.94         | 0.00091 | -5.08         | 0.00003 |
| STM3385         | fis     | DNA-binding protein Fis                             | -3.60         | 0.00652 | -1.23         | 0.02744 | -3.80         | 0.00016 |
| STM3385         | fis     | DNA-binding protein Fis                             | -2.09         | 0.01319 | -1.06         | 0.01830 | -2.85         | 0.00085 |
| STM3386         | yhdJ    | putative methyltransferase                          | -0.02         | 0.97719 | -1.43         | 0.03512 | 0.64          | 0.62782 |
| STM3386         | yhdJ    | putative methyltransferase                          | 0.23          | 0.89107 | -0.45         | 0.64225 | 2.70          | 0.00271 |
| STM3387         | yhdU    | putative periplasmic protein                        | -0.54         | 0.20028 | -0.95         | 0.01495 | -0.81         | 0.13667 |
| STM3387         | yhdU    | putative periplasmic protein                        | -0.49         | 0.34656 | -0.99         | 0.01579 | -0.25         | 0.52606 |
| STM3388         | STM3388 | putative signal transduction protein                | -1.39         | 0.13015 | -0.04         | 0.94974 | -1.19         | 0.02497 |
| STM3388         | STM3388 | putative signal transduction protein                | -1.31         | 0.13706 | -0.78         | 0.07774 | 1.66          | 0.29870 |
| STM3389         | envR    | transcriptional repressor                           | -0.25         | 0.67940 | -0.56         | 0.18625 | -0.27         | 0.56046 |
| STM3389         | envR    | transcriptional repressor                           | 0.48          | 0.30879 | -0.56         | 0.33116 | 0.32          | 0.51662 |
| STM3390         | acrE    | acriflavine resistance protein E precursor          | 0.00          | 0.99568 | -0.51         | 0.19196 | -0.19         | 0.76633 |
| STM3390         | acrE    | acriflavine resistance protein E precursor          | 0.44          | 0.33830 | -1.41         | 0.00338 | -0.44         | 0.31526 |
| STM3391         | acrF    | multidrug transport protein                         | -0.59         | 0.25510 | -1.17         | 0.01096 | -0.35         | 0.37615 |
| STM3391         | acrF    | multidrug transport protein                         | 0.47          | 0.26727 | -0.95         | 0.02064 | 0.61          | 0.12663 |
| STM3392         | yhdV    | putative outer membrane lipoprotein                 | 0.25          | 0.83819 | -0.33         | 0.27468 | -0.18         | 0.80357 |
| STM3392         | yhdV    | putative outer membrane lipoprotein                 | 0.45          | 0.71254 | -0.26         | 0.47083 | -0.64         | 0.23296 |
| STM3393         | rrfF    | STM3393                                             | 0.39          | 0.65080 | -0.13         | 0.86476 | 0.30          | 0.68816 |
| STM3393         | rrfF    | STM3393                                             | 1.32          | 0.13685 | -0.15         | 0.79185 | 0.12          | 0.84461 |
| STM3394         | thrV    | STM3394                                             | -1.56         | 0.04856 | -1.34         | 0.00612 | -1.10         | 0.02940 |
| STM3394         | thrV    | STM3394                                             | -0.46         | 0.30809 | -1.22         | 0.00354 | -0.65         | 0.19622 |
| STM3396         | rrlD    | STM3396                                             | -2.94         | 0.01045 | -0.28         | 0.62868 | -2.16         | 0.01145 |
| STM3396         | rrlD    | STM3396                                             | -2.04         | 0.01834 | 0.14          | 0.81438 | -1.43         | 0.03094 |
| STM3397         | -       | STM3397                                             | 1.17          | 0.17624 | 0.64          | 0.03571 | 1.13          | 0.02755 |
| STM3397         | -       | STM3397                                             | 1.82          | 0.01571 | 0.47          | 0.11340 | 1.24          | 0.00837 |
| STM3398         | rrsD    | STM3398                                             | -1.48         | 0.28608 | 0.61          | 0.16337 | 0.07          | 0.89430 |
| STM3398         | rrsD    | STM3398                                             | -1.51         | 0.12503 | 0.00          | 0.99442 | 0.70          | 0.19050 |
| STM3399         | yrdA    | putative ferripyochelin-binding protein             | -0.44         | 0.31122 | -0.07         | 0.83626 | 0.54          | 0.12254 |
| STM3399         | yrdA    | putative ferripyochelin-binding protein             | 0.16          | 0.74962 | 0.30          | 0.39981 | 0.74          | 0.12344 |
| STM3400         | yrdB    | putative periplasmic protein                        | -1.11         | 0.06618 | -0.09         | 0.82255 | 0.55          | 0.13114 |
| STM3400         | yrdB    | putative periplasmic protein                        | -0.40         | 0.47211 | -0.16         | 0.68023 | 0.98          | 0.02457 |
| STM3401         | aroE    | shikimate 5-dehydrogenase                           | -0.98         | 0.09360 | 0.10          | 0.80248 | 0.07          | 0.86712 |
| STM3401         | aroE    | shikimate 5-dehydrogenase                           | -0.01         | 0.97698 | -0.34         | 0.33005 | 0.44          | 0.36840 |
| STM3402         | yrdC    | putative dsRNA-binding protein                      | -1.61         | 0.04050 | -1.18         | 0.01585 | -0.87         | 0.02782 |
| STM3402         | yrdC    | putative dsRNA-binding protein                      | -1.36         | 0.02232 | -1.43         | 0.00176 | -0.49         | 0.19956 |
| STM3403         | yrdD    | putative DNA topoisomerase                          | -1.29         | 0.07241 | -0.19         | 0.67941 | -0.17         | 0.83020 |
| STM3403         | yrdD    | putative DNA topoisomerase                          | -1.20         | 0.12661 | -0.61         | 0.09806 | -0.66         | 0.10520 |
| STM3404         | smg     | hypothetical protein STM3404                        | -1.06         | 0.06614 | 1.06          | 0.00548 | 0.79          | 0.06189 |
| STM3404         | smg     | hypothetical protein STM3404                        | -0.40         | 0.37797 | 1.03          | 0.00999 | 1.48          | 0.00881 |
| STM3405         | smf     | putative competence protein                         | -0.09         | 0.89129 | 1.45          | 0.00258 | 1.84          | 0.00157 |
| STM3405         | smf     | putative competence protein                         | 0.11          | 0.81152 | 1.87          | 0.00036 | 2.42          | 0.00084 |
| STM3406         | def     | peptide deformylase                                 | -1.71         | 0.02604 | -0.26         | 0.46273 | -0.79         | 0.04379 |
| STM3406         | def     | peptide deformylase                                 | -0.54         | 0.60472 | -0.20         | 0.56737 | 0.71          | 0.16686 |
| STM3407         | fnt     | methionyl-tRNA formyltransferase                    | -1.45         | 0.02265 | -0.32         | 0.32042 | -0.45         | 0.30913 |
| STM3407         | fnt     | methionyl-tRNA formyltransferase                    | -1.03         | 0.07835 | -0.85         | 0.02791 | -0.81         | 0.10554 |
| STM3408         | sun     | putative rRNA methylase                             | -0.28         | 0.64934 | -0.70         | 0.05442 | -0.42         | 0.30210 |
| STM3408         | sun     | putative rRNA methylase                             | -0.16         | 0.78371 | -1.96         | 0.00077 | -0.72         | 0.16341 |
| STM3409         | trkA    | potassium transporter peripheral membrane component | -1.65         | 0.02526 | -1.31         | 0.00493 | -1.59         | 0.00333 |
| STM3409         | trkA    | potassium transporter peripheral membrane component | -1.03         | 0.06207 | -0.80         | 0.03140 | -1.05         | 0.06882 |
| STM3410         | mscL    | large-conductance mechanosensitive channel          | -1.37         | 0.02998 | -0.75         | 0.04418 | -0.76         | 0.08841 |
| STM3410         | mscL    | large-conductance mechanosensitive channel          | -1.42         | 0.03667 | -0.63         | 0.06054 | -0.89         | 0.06050 |
| STM3412         | zntR    | zinc-responsive transcriptional regulator           | -1.24         | 0.03561 | -0.12         | 0.75425 | -0.93         | 0.02894 |
| STM3412         | zntR    | zinc-responsive transcriptional regulator           | -0.15         | 0.73218 | 0.40          | 0.27257 | -0.63         | 0.09329 |
| STM3413         | yhdN    | putative cytoplasmic protein                        | -2.13         | 0.00787 | -0.80         | 0.07129 | -1.65         | 0.00351 |
| STM3413         | yhdN    | putative cytoplasmic protein                        | -0.87         | 0.12362 | 0.34          | 0.45215 | -1.80         | 0.00186 |
| STM3414         | rplQ    | 50S ribosomal protein L17                           | -4.07         | 0.01449 | -1.92         | 0.00987 | -5.21         | 0.00002 |
| STM3414         | rplQ    | 50S ribosomal protein L17                           | -3.86         | 0.00985 | -1.13         | 0.01447 | -5.81         | 0.00002 |
| STM3415         | rpoA    | DNA-directed RNA polymerase alpha subunit           | -2.30         | 0.02000 | -0.48         | 0.12500 | -6.28         | 0.00001 |
| STM3415         | rpoA    | DNA-directed RNA polymerase alpha subunit           | -1.40         | 0.05644 | -0.47         | 0.10840 | -6.59         | 0.00001 |
| STM3416         | rpsD    | 30S ribosomal protein S4                            | -1.42         | 0.11466 | -0.27         | 0.67988 | -5.64         | 0.00005 |
| STM3416         | rpsD    | 30S ribosomal protein S4                            | -0.98         | 0.13007 | -0.12         | 0.74224 | -6.31         | 0.00002 |
| STM3417         | rpsK    | 30S ribosomal protein S11                           | -2.21         | 0.03577 | -0.84         | 0.03398 | -6.24         | 0.00002 |
| STM3417         | rpsK    | 30S ribosomal protein S11                           | -2.22         | 0.01423 | -0.36         | 0.33350 | -6.14         | 0.00002 |
| STM3418         | rpsM    | 30S ribosomal protein S13                           | -1.71         | 0.02344 | -0.72         | 0.28230 | -5.62         | 0.00002 |
| STM3418         | rpsM    | 30S ribosomal protein S13                           | -1.81         | 0.01301 | -0.15         | 0.61713 | -6.00         | 0.00002 |

**Table S2.** Genome-wide expression of *Salmonella enterica* serovar Typhimurium inside fibroblasts

|                 |         |                                                         | Intracellular WT<br>24 h p.i.                                                      |         | Intracellular <i>phoP</i><br>24 h p.i.                                              |         | Extracellular WT<br>stationary phase                                                |         |
|-----------------|---------|---------------------------------------------------------|------------------------------------------------------------------------------------|---------|-------------------------------------------------------------------------------------|---------|-------------------------------------------------------------------------------------|---------|
|                 |         |                                                         | Relative to WT<br>exponential LB                                                   |         | Relative to <i>phoP</i><br>exponential LB                                           |         | Relative to WT<br>exponential LB                                                    |         |
|                 |         |                                                         |  |         |  |         |  |         |
| Systematic name | Gene    | Product                                                 | log2Ratio (M)                                                                      | p value | log2Ratio (M)                                                                       | p value | log2Ratio (M)                                                                       | p value |
| STM3420         | secY    | preprotein translocase SecY                             | -2.50                                                                              | 0.02124 | -0.66                                                                               | 0.21065 | -5.34                                                                               | 0.00002 |
| STM3420         | secY    | preprotein translocase SecY                             | -2.63                                                                              | 0.00720 | -0.43                                                                               | 0.15166 | -5.26                                                                               | 0.00003 |
| STM3421         | rplO    | 50S ribosomal protein L15                               | -2.07                                                                              | 0.01765 | -0.60                                                                               | 0.07129 | -6.06                                                                               | 0.00002 |
| STM3421         | rplO    | 50S ribosomal protein L15                               | -1.65                                                                              | 0.01328 | -0.60                                                                               | 0.13637 | -6.47                                                                               | 0.00001 |
| STM3422         | rpmD    | 50S ribosomal protein L30                               | -2.83                                                                              | 0.00750 | -1.22                                                                               | 0.00732 | -5.63                                                                               | 0.00002 |
| STM3422         | rpmD    | 50S ribosomal protein L30                               | -2.82                                                                              | 0.03306 | -0.54                                                                               | 0.09229 | -6.15                                                                               | 0.00003 |
| STM3423         | rpsE    | 30S ribosomal protein S5                                | -1.43                                                                              | 0.14047 | 0.61                                                                                | 0.08848 | -5.33                                                                               | 0.00002 |
| STM3423         | rpsE    | 30S ribosomal protein S5                                | -0.93                                                                              | 0.06959 | 0.19                                                                                | 0.53226 | -4.86                                                                               | 0.00006 |
| STM3424         | rplR    | 50S ribosomal protein L18                               | -1.96                                                                              | 0.01355 | -0.52                                                                               | 0.36695 | -5.58                                                                               | 0.00001 |
| STM3424         | rplR    | 50S ribosomal protein L18                               | -1.68                                                                              | 0.01578 | 0.08                                                                                | 0.84293 | -5.77                                                                               | 0.00005 |
| STM3425         | rplF    | 50S ribosomal protein L6                                | -0.22                                                                              | 0.65450 | -0.45                                                                               | 0.25023 | -6.00                                                                               | 0.00001 |
| STM3425         | rplF    | 50S ribosomal protein L6                                | -1.05                                                                              | 0.12786 | -0.18                                                                               | 0.63702 | -6.47                                                                               | 0.00002 |
| STM3426         | rpsH    | 30S ribosomal protein S8                                | -2.72                                                                              | 0.00595 | -1.09                                                                               | 0.06002 | -6.42                                                                               | 0.00001 |
| STM3426         | rpsH    | 30S ribosomal protein S8                                | -1.56                                                                              | 0.07619 | -0.60                                                                               | 0.08935 | -6.65                                                                               | 0.00002 |
| STM3426         | rpsH    | 30S ribosomal protein S8                                | -2.65                                                                              | 0.00688 | -1.23                                                                               | 0.01868 | -6.87                                                                               | 0.00001 |
| STM3426         | rpsH    | 30S ribosomal protein S8                                | -0.86                                                                              | 0.09879 | -0.07                                                                               | 0.84438 | -6.28                                                                               | 0.00002 |
| STM3427,S       | rpsN    | 30S ribosomal subunit protein S14                       | -2.87                                                                              | 0.00888 | -0.66                                                                               | 0.08892 | -7.72                                                                               | 0.00001 |
| STM3427,S       | rpsN    | 30S ribosomal subunit protein S14                       | -1.44                                                                              | 0.02561 | -0.02                                                                               | 0.96048 | -6.55                                                                               | 0.00002 |
| STM3428         | rplE    | 50S ribosomal protein L5                                | -3.22                                                                              | 0.00571 | -1.05                                                                               | 0.06428 | -5.63                                                                               | 0.00003 |
| STM3428         | rplE    | 50S ribosomal protein L5                                | -3.16                                                                              | 0.00541 | -1.02                                                                               | 0.02699 | -6.59                                                                               | 0.00002 |
| STM3429         | rplX    | 50S ribosomal protein L24                               | -4.28                                                                              | 0.01377 | -1.46                                                                               | 0.00846 | -6.21                                                                               | 0.00002 |
| STM3429         | rplX    | 50S ribosomal protein L24                               | -3.03                                                                              | 0.01435 | -1.28                                                                               | 0.02860 | -5.90                                                                               | 0.00002 |
| STM3429         | rplX    | 50S ribosomal protein L24                               | -2.89                                                                              | 0.00743 | -1.33                                                                               | 0.00236 | -5.91                                                                               | 0.00002 |
| STM3429         | rplX    | 50S ribosomal protein L24                               | -2.95                                                                              | 0.00547 | -0.93                                                                               | 0.01631 | -6.29                                                                               | 0.00002 |
| STM3430         | rplN    | 50S ribosomal protein L14                               | -3.49                                                                              | 0.01509 | -1.96                                                                               | 0.00482 | -5.86                                                                               | 0.00002 |
| STM3430         | rplN    | 50S ribosomal protein L14                               | -2.26                                                                              | 0.04528 | -1.06                                                                               | 0.02958 | -5.87                                                                               | 0.00002 |
| STM3430         | rplN    | 50S ribosomal protein L14                               | -3.83                                                                              | 0.01172 | -1.88                                                                               | 0.00043 | -6.48                                                                               | 0.00001 |
| STM3430         | rplN    | 50S ribosomal protein L14                               | -2.34                                                                              | 0.00673 | -0.95                                                                               | 0.03834 | -6.15                                                                               | 0.00002 |
| STM3431         | rpsQ    | 30S ribosomal protein S17                               | -2.83                                                                              | 0.00547 | -1.04                                                                               | 0.04786 | -5.35                                                                               | 0.00002 |
| STM3431         | rpsQ    | 30S ribosomal protein S17                               | -2.50                                                                              | 0.01117 | -1.18                                                                               | 0.00459 | -4.76                                                                               | 0.00003 |
| STM3432         | rpmC    | 50S ribosomal protein L29                               | -2.82                                                                              | 0.03417 | -0.70                                                                               | 0.14203 | -4.57                                                                               | 0.00002 |
| STM3432         | rpmC    | 50S ribosomal protein L29                               | -1.33                                                                              | 0.02747 | -0.44                                                                               | 0.27468 | -4.87                                                                               | 0.00002 |
| STM3433         | rplP    | 50S ribosomal protein L16                               | -1.46                                                                              | 0.04812 | -0.15                                                                               | 0.69391 | -5.31                                                                               | 0.00002 |
| STM3433         | rplP    | 50S ribosomal protein L16                               | -0.21                                                                              | 0.64092 | 0.18                                                                                | 0.57928 | -5.08                                                                               | 0.00003 |
| STM3434         | rpsC    | 30S ribosomal protein S3                                | -1.29                                                                              | 0.15305 | 0.55                                                                                | 0.06738 | -5.71                                                                               | 0.00002 |
| STM3434         | rpsC    | 30S ribosomal protein S3                                | -0.71                                                                              | 0.13497 | 0.32                                                                                | 0.30992 | -5.11                                                                               | 0.00003 |
| STM3435         | rplV    | 50S ribosomal protein L22                               | -1.52                                                                              | 0.03475 | -0.30                                                                               | 0.33313 | -6.95                                                                               | 0.00001 |
| STM3435         | rplV    | 50S ribosomal protein L22                               | -1.26                                                                              | 0.06701 | -0.27                                                                               | 0.42704 | -6.61                                                                               | 0.00001 |
| STM3436         | rpsS    | 30S ribosomal protein S19                               | -1.56                                                                              | 0.02998 | 0.07                                                                                | 0.83611 | -4.05                                                                               | 0.00631 |
| STM3436         | rpsS    | 30S ribosomal protein S19                               | -0.72                                                                              | 0.12160 | 0.28                                                                                | 0.37635 | -5.31                                                                               | 0.00014 |
| STM3437         | rplB    | 50S ribosomal protein L2                                | -2.09                                                                              | 0.03587 | -0.11                                                                               | 0.70446 | -4.82                                                                               | 0.00018 |
| STM3437         | rplB    | 50S ribosomal protein L2                                | -1.67                                                                              | 0.02460 | -0.46                                                                               | 0.11360 | -5.21                                                                               | 0.00002 |
| STM3438         | rplW    | 50S ribosomal protein L23                               | -1.34                                                                              | 0.15487 | 0.25                                                                                | 0.46639 | -6.35                                                                               | 0.00002 |
| STM3438         | rplW    | 50S ribosomal protein L23                               | -0.87                                                                              | 0.22324 | 0.09                                                                                | 0.75138 | -6.86                                                                               | 0.00004 |
| STM3439         | rplD    | 50S ribosomal protein L4                                | -0.50                                                                              | 0.30358 | 0.02                                                                                | 0.96866 | -7.04                                                                               | 0.00002 |
| STM3439         | rplD    | 50S ribosomal protein L4                                | -0.88                                                                              | 0.08481 | 0.02                                                                                | 0.95522 | -7.83                                                                               | 0.00001 |
| STM3440         | rplC    | 50S ribosomal protein L3                                | -2.31                                                                              | 0.04409 | -0.77                                                                               | 0.03609 | -6.87                                                                               | 0.00001 |
| STM3440         | rplC    | 50S ribosomal protein L3                                | -1.15                                                                              | 0.03984 | -0.56                                                                               | 0.16031 | -6.51                                                                               | 0.00002 |
| STM3456         | yheV    | putative cytoplasmic protein                            | 0.54                                                                               | 0.23442 | 0.19                                                                                | 0.50607 | -0.75                                                                               | 0.08415 |
| STM3456         | yheV    | putative cytoplasmic protein                            | -0.12                                                                              | 0.89465 | 0.25                                                                                | 0.47059 | -0.70                                                                               | 0.06727 |
| STM3457         | kefB    | glutathione-regulated potassium-efflux system protein   | 0.19                                                                               | 0.82818 | 0.81                                                                                | 0.02599 | -0.54                                                                               | 0.17491 |
| STM3457         | kefB    | glutathione-regulated potassium-efflux system protein   | 0.77                                                                               | 0.14129 | 0.69                                                                                | 0.16945 | 0.31                                                                                | 0.42791 |
| STM3458         | yheR    | glutathione-regulated potassium-efflux system ancillary | -0.96                                                                              | 0.18619 | -0.16                                                                               | 0.70641 | -1.34                                                                               | 0.04752 |
| STM3458         | yheR    | glutathione-regulated potassium-efflux system ancillary | -1.05                                                                              | 0.25384 | -0.50                                                                               | 0.16531 | -2.81                                                                               | 0.00369 |
| STM3459         | yheS    | putative ABC transporter ATPase component               | -0.71                                                                              | 0.16181 | -0.42                                                                               | 0.27106 | -0.60                                                                               | 0.32930 |
| STM3459         | yheS    | putative ABC transporter ATPase component               | 0.11                                                                               | 0.79537 | -0.02                                                                               | 0.95438 | -1.22                                                                               | 0.02931 |
| STM3461         | STM3461 | putative cytoplasmic protein                            | -1.03                                                                              | 0.06064 | 0.69                                                                                | 0.06222 | 0.10                                                                                | 0.82501 |
| STM3461         | STM3461 | putative cytoplasmic protein                            | 0.02                                                                               | 0.96475 | 1.07                                                                                | 0.00717 | 0.38                                                                                | 0.27889 |
| STM3462         | yheT    | putative hydrolase                                      | -1.98                                                                              | 0.01479 | -1.23                                                                               | 0.00288 | -0.59                                                                               | 0.20443 |
| STM3462         | yheT    | putative hydrolase                                      | -1.00                                                                              | 0.05058 | -0.61                                                                               | 0.05922 | -1.01                                                                               | 0.02853 |
| STM3463         | yheU    | hypothetical protein STM3463                            | -0.73                                                                              | 0.18395 | -0.26                                                                               | 0.46294 | -1.30                                                                               | 0.00694 |
| STM3463         | yheU    | hypothetical protein STM3463                            | -0.38                                                                              | 0.42879 | -0.21                                                                               | 0.48124 | -0.16                                                                               | 0.85658 |
| STM3464         | prkB    | putative phosphoribulokinase                            | -1.22                                                                              | 0.13268 | -0.03                                                                               | 0.93074 | 0.23                                                                                | 0.82944 |
| STM3464         | prkB    | putative phosphoribulokinase                            | -0.12                                                                              | 0.86170 | -0.24                                                                               | 0.50611 | -1.05                                                                               | 0.04106 |
| STM3465         | yhfA    | putative inner membrane protein                         | -1.35                                                                              | 0.03016 | -0.76                                                                               | 0.13274 | -0.50                                                                               | 0.33093 |
| STM3465         | yhfA    | putative inner membrane protein                         | -1.71                                                                              | 0.02037 | -0.78                                                                               | 0.02908 | -0.74                                                                               | 0.21366 |
| STM3466         | crp     | catabolite activator protein                            | -1.46                                                                              | 0.03369 | -0.38                                                                               | 0.22710 | 0.36                                                                                | 0.29990 |
| STM3466         | crp     | catabolite activator protein                            | -1.56                                                                              | 0.01609 | -0.65                                                                               | 0.04781 | 1.03                                                                                | 0.02458 |
| STM3467         | yhfK    | putative inner membrane protein                         | 0.48                                                                               | 0.59927 | 0.47                                                                                | 0.14251 | -0.72                                                                               | 0.19663 |
| STM3467         | yhfK    | putative inner membrane protein                         | 0.47                                                                               | 0.32529 | 0.00                                                                                | 0.99245 | 1.69                                                                                | 0.00177 |

**Table S2.** Genome-wide expression of *Salmonella enterica* serovar Typhimurium inside fibroblasts

Intracellular WT 24 h p.i.      Intracellular *phoP* 24 h p.i.      Extracellular WT stationary phase

Relative to WT exponential LB      Relative to *phoP* exponential LB      Relative to WT exponential LB



| Systematic name | Gene | Product                                    | log2Ratio (M) | p value | log2Ratio (M) | p value | log2Ratio (M) | p value |
|-----------------|------|--------------------------------------------|---------------|---------|---------------|---------|---------------|---------|
| STM3468         | argD | bifunctional                               | -0.43         | 0.63577 | 0.67          | 0.12795 | -0.07         | 0.91566 |
| STM3468         | argD | bifunctional                               | 0.48          | 0.52824 | 0.63          | 0.04218 | -0.37         | 0.39283 |
| STM3469         | pabA | para-aminobenzoate synthase component II   | 0.27          | 0.69320 | 0.12          | 0.75531 | -0.84         | 0.10465 |
| STM3469         | pabA | para-aminobenzoate synthase component II   | -0.04         | 0.94155 | 0.70          | 0.02713 | -0.01         | 0.99115 |
| STM3470         | fic  | putative cell filamentation protein        | -0.63         | 0.19255 | 0.93          | 0.01310 | 1.12          | 0.01814 |
| STM3470         | fic  | putative cell filamentation protein        | -0.28         | 0.59387 | 0.82          | 0.01673 | 1.33          | 0.01623 |
| STM3472         | ppiA | peptidyl-prolyl cis-trans isomerase A      | -0.73         | 0.39937 | 0.75          | 0.02530 | -0.76         | 0.14767 |
| STM3472         | ppiA | peptidyl-prolyl cis-trans isomerase A      | 0.88          | 0.09689 | 0.78          | 0.03179 | -0.54         | 0.26035 |
| STM3473         | yhfC | hypothetical protein STM3473               | -1.32         | 0.04652 | -2.34         | 0.00047 | -2.13         | 0.00531 |
| STM3473         | yhfC | hypothetical protein STM3473               | -1.09         | 0.03924 | -2.78         | 0.00068 | -1.58         | 0.01119 |
| STM3474         | nirB | nitrite reductase large subunit            | -0.56         | 0.27302 | -0.45         | 0.27937 | -0.92         | 0.29073 |
| STM3474         | nirB | nitrite reductase large subunit            | 0.90          | 0.28793 | -0.34         | 0.30199 | 0.32          | 0.39679 |
| STM3475         | nirD | nitrite reductase small subunit            | 3.63          | 0.00686 | -1.08         | 0.02775 | -1.12         | 0.00984 |
| STM3475         | nirD | nitrite reductase small subunit            | 3.62          | 0.00649 | -0.13         | 0.69230 | 0.78          | 0.06357 |
| STM3476         | nirC | nitrite transport protein                  | -0.39         | 0.50370 | -0.34         | 0.30677 | -0.95         | 0.03460 |
| STM3476         | nirC | nitrite transport protein                  | -0.72         | 0.19975 | -0.78         | 0.11302 | -1.38         | 0.09479 |
| STM3477         | cysG | siroheme synthase                          | -1.33         | 0.03584 | -0.37         | 0.29496 | -1.20         | 0.02302 |
| STM3477         | cysG | siroheme synthase                          | 0.28          | 0.57995 | -0.41         | 0.25850 | -0.35         | 0.34475 |
| STM3478         | bigA | putative surface-exposed virulence protein | -0.17         | 0.82482 | -0.81         | 0.06742 | -0.90         | 0.14447 |
| STM3478         | bigA | putative surface-exposed virulence protein | 0.47          | 0.36425 | -0.36         | 0.18105 | 0.03          | 0.95841 |
| STM3480         | yhfL | putative outer membrane lipoprotein        | -1.92         | 0.01801 | -1.68         | 0.00106 | -2.39         | 0.00904 |
| STM3480         | yhfL | putative outer membrane lipoprotein        | -0.81         | 0.12658 | -2.23         | 0.00037 | -2.47         | 0.00040 |
| STM3481         | trpS | tryptophanyl-tRNA synthetase               | -2.81         | 0.00796 | -2.39         | 0.00027 | -2.56         | 0.00026 |
| STM3481         | trpS | tryptophanyl-tRNA synthetase               | -1.83         | 0.01576 | -2.15         | 0.00022 | -2.60         | 0.00016 |
| STM3482         | gph  | phosphoglycolate phosphatase               | -3.45         | 0.00512 | -1.78         | 0.00081 | -2.99         | 0.00009 |
| STM3482         | gph  | phosphoglycolate phosphatase               | -2.72         | 0.00673 | -1.90         | 0.00076 | -2.40         | 0.00094 |
| STM3483         | rpe  | ribulose-phosphate 3-epimerase             | -1.94         | 0.06216 | -1.08         | 0.00562 | -1.56         | 0.00250 |
| STM3483         | rpe  | ribulose-phosphate 3-epimerase             | -1.62         | 0.21234 | -1.51         | 0.00332 | -0.94         | 0.02531 |
| STM3484         | dam  | DNA adenine methylase                      | -2.38         | 0.01572 | -1.01         | 0.01898 | -2.79         | 0.00129 |
| STM3484         | dam  | DNA adenine methylase                      | -1.28         | 0.12631 | -1.44         | 0.00334 | -1.90         | 0.00238 |
| STM3485         | damX | membrane protein DamX                      | -2.93         | 0.00547 | -2.15         | 0.00043 | -2.89         | 0.00034 |
| STM3485         | damX | membrane protein DamX                      | -1.50         | 0.06407 | -1.51         | 0.00389 | -2.93         | 0.00011 |
| STM3486         | aroB | 3-dehydroquinate synthase                  | -2.50         | 0.00595 | -1.23         | 0.01004 | -3.06         | 0.00020 |
| STM3486         | aroB | 3-dehydroquinate synthase                  | -2.56         | 0.00845 | -1.07         | 0.00822 | -2.56         | 0.00020 |
| STM3487         | aroK | shikimate kinase I                         | -3.28         | 0.01041 | -1.54         | 0.00229 | -3.03         | 0.00053 |
| STM3487         | aroK | shikimate kinase I                         | -3.00         | 0.00796 | -1.82         | 0.00114 | -3.01         | 0.00012 |
| STM3488         | hofQ | putative type IV pilin assembly protein    | -0.19         | 0.79541 | -0.64         | 0.08377 | -1.38         | 0.06065 |
| STM3488         | hofQ | putative type IV pilin assembly protein    | 2.04          | 0.01240 | -1.03         | 0.04103 | 0.07          | 0.86859 |
| STM3489         | yrfA | putative inner membrane protein            | -0.88         | 0.29292 | 0.52          | 0.12364 | 0.43          | 0.53809 |
| STM3489         | yrfA | putative inner membrane protein            | 0.68          | 0.24833 | 0.59          | 0.57173 | -0.15         | 0.71950 |
| STM3490         | yrfB | putative inner membrane protein            | -0.66         | 0.14629 | -1.68         | 0.00123 | -0.46         | 0.38154 |
| STM3490         | yrfB | putative inner membrane protein            | 1.03          | 0.17351 | -2.78         | 0.00006 | 0.07          | 0.91630 |
| STM3491         | yrfC | putative inner membrane protein            | 3.09          | 0.03420 | 1.60          | 0.03397 | 3.71          | 0.00050 |
| STM3491         | yrfC | putative inner membrane protein            | 6.85          | 0.01572 | 2.70          | 0.00097 | 6.37          | 0.00008 |
| STM3492         | yrfD | putative periplasmic protein               | -0.14         | 0.80217 | -1.22         | 0.05860 | -1.18         | 0.05973 |
| STM3492         | yrfD | putative periplasmic protein               | 0.76          | 0.19650 | -2.09         | 0.00016 | 0.03          | 0.97036 |
| STM3493         | mrcA | penicillin-binding protein 1A              | 0.02          | 0.96137 | -0.17         | 0.61286 | 0.58          | 0.33672 |
| STM3493         | mrcA | penicillin-binding protein 1A              | 1.60          | 0.01425 | -0.64         | 0.10706 | 1.34          | 0.20240 |
| STM3494,S       | yrfE | putative NTP pyrophosphohydrolase          | -0.12         | 0.80373 | -0.99         | 0.01250 | -1.47         | 0.03920 |
| STM3494,S       | yrfE | putative NTP pyrophosphohydrolase          | 0.89          | 0.07006 | -0.76         | 0.03908 | 0.02          | 0.96065 |
| STM3495         | yrfF | putative inner membrane protein            | -1.53         | 0.01479 | 0.79          | 0.63620 | -1.29         | 0.01926 |
| STM3495         | yrfF | putative inner membrane protein            | 0.13          | 0.89099 | -1.11         | 0.00599 | -2.79         | 0.03345 |
| STM3496         | yrfG | putative hydrolase                         | -2.01         | 0.00994 | -0.40         | 0.20224 | -2.91         | 0.00011 |
| STM3496         | yrfG | putative hydrolase                         | -1.02         | 0.05101 | -0.45         | 0.18827 | -2.36         | 0.00049 |
| STM3497         | yrfH | heat shock protein                         | -0.18         | 0.67327 | -0.08         | 0.84454 | -1.89         | 0.00623 |
| STM3497         | yrfH | heat shock protein                         | 0.29          | 0.49059 | -0.14         | 0.63156 | -2.05         | 0.00482 |
| STM3498         | hslO | Hsp33-like chaperonin                      | -1.42         | 0.02101 | -0.77         | 0.04391 | -3.30         | 0.00017 |
| STM3498         | hslO | Hsp33-like chaperonin                      | -0.32         | 0.46688 | -0.91         | 0.03131 | -2.28         | 0.00035 |
| STM3499         | yhgE | putative inner membrane protein            | -0.38         | 0.47761 | -0.07         | 0.91015 | -1.03         | 0.09597 |
| STM3499         | yhgE | putative inner membrane protein            | 0.41          | 0.82613 | -0.95         | 0.05908 | -0.86         | 0.28567 |
| STM3500         | pckA | phosphoenolpyruvate carboxykinase          | -0.58         | 0.35838 | 0.38          | 0.80377 | -1.40         | 0.08958 |
| STM3500         | pckA | phosphoenolpyruvate carboxykinase          | 0.46          | 0.31782 | -0.92         | 0.02516 | -0.84         | 0.06873 |
| STM3501         | envZ | osmolarity sensor protein                  | 0.08          | 0.86166 | -0.55         | 0.16014 | -1.35         | 0.00880 |
| STM3501         | envZ | osmolarity sensor protein                  | 1.17          | 0.10434 | -0.04         | 0.93074 | -0.36         | 0.44030 |
| STM3502         | ompR | osmolarity response regulator              | -1.26         | 0.03751 | -0.54         | 0.09961 | -1.30         | 0.07020 |
| STM3502         | ompR | osmolarity response regulator              | -0.08         | 0.87320 | -0.81         | 0.02864 | -1.14         | 0.02890 |
| STM3503         | greB | transcription elongation factor GreB       | -1.14         | 0.07710 | -0.85         | 0.02591 | -1.55         | 0.00246 |
| STM3503         | greB | transcription elongation factor GreB       | 0.52          | 0.33087 | -0.85         | 0.02287 | -1.02         | 0.05272 |
| STM3504         | yhgF | putative RNase R                           | -0.14         | 0.82290 | -0.35         | 0.64603 | -1.71         | 0.01320 |
| STM3504         | yhgF | putative RNase R                           | -1.30         | 0.06233 | -1.69         | 0.00500 | -2.46         | 0.00221 |

|                 |         |                                                | Intracellular WT<br>24 h p.i.                                                      |         | Intracellular <i>phoP</i><br>24 h p.i.                                              |         | Extracellular WT<br>stationary phase                                                |         |
|-----------------|---------|------------------------------------------------|------------------------------------------------------------------------------------|---------|-------------------------------------------------------------------------------------|---------|-------------------------------------------------------------------------------------|---------|
|                 |         |                                                | Relative to WT<br>exponential LB                                                   |         | Relative to <i>phoP</i><br>exponential LB                                           |         | Relative to WT<br>exponential LB                                                    |         |
|                 |         |                                                |  |         |  |         |  |         |
| Systematic name | Gene    | Product                                        | log2Ratio (M)                                                                      | p value | log2Ratio (M)                                                                       | p value | log2Ratio (M)                                                                       | p value |
| STM3505         | feoA    | ferrous iron transport protein A               | -0.45                                                                              | 0.51135 | -0.31                                                                               | 0.30892 | -2.14                                                                               | 0.00119 |
| STM3505         | feoA    | ferrous iron transport protein A               | -0.64                                                                              | 0.66707 | -0.15                                                                               | 0.67595 | -2.61                                                                               | 0.00122 |
| STM3506         | feoB    | ferrous iron transport protein B               | -2.20                                                                              | 0.00747 | -0.45                                                                               | 0.20042 | -3.10                                                                               | 0.00612 |
| STM3506         | feoB    | ferrous iron transport protein B               | -0.03                                                                              | 0.97698 | -0.46                                                                               | 0.18646 | -0.98                                                                               | 0.16190 |
| STM3507         | yhgG    | putative cytoplasmic protein                   | -1.41                                                                              | 0.11096 | -0.78                                                                               | 0.02289 | -2.30                                                                               | 0.00048 |
| STM3507         | yhgG    | putative cytoplasmic protein                   | -0.71                                                                              | 0.13705 | -1.22                                                                               | 0.00742 | -0.64                                                                               | 0.14597 |
| STM3508         | STM3508 | putative cytoplasmic protein                   | 0.33                                                                               | 0.46761 | -0.69                                                                               | 0.12218 | -0.87                                                                               | 0.08938 |
| STM3508         | STM3508 | putative cytoplasmic protein                   | 0.81                                                                               | 0.27387 | -0.12                                                                               | 0.70431 | 0.29                                                                                | 0.56284 |
| STM3509         | bioH    | putative hydrolase                             | -1.25                                                                              | 0.04117 | -0.11                                                                               | 0.77755 | -1.60                                                                               | 0.00372 |
| STM3509         | bioH    | putative hydrolase                             | 0.05                                                                               | 0.95651 | -0.31                                                                               | 0.46473 | -1.27                                                                               | 0.05524 |
| STM3510         | yhgH    | putative amidophosphoribosyltransferase        | -2.59                                                                              | 0.01041 | -1.69                                                                               | 0.00115 | -2.30                                                                               | 0.00080 |
| STM3510         | yhgH    | putative amidophosphoribosyltransferase        | -2.05                                                                              | 0.00818 | -1.77                                                                               | 0.00154 | 0.15                                                                                | 0.83658 |
| STM3511         | yhgl    | putative thioredoxin-like protein              | -1.40                                                                              | 0.09590 | 0.27                                                                                | 0.40068 | -2.63                                                                               | 0.00024 |
| STM3511         | yhgl    | putative thioredoxin-like protein              | -0.55                                                                              | 0.46541 | -0.05                                                                               | 0.89425 | -2.10                                                                               | 0.00096 |
| STM3512         | gntT    | high-affinity gluconate permease               | -2.44                                                                              | 0.01376 | -3.45                                                                               | 0.00007 | -2.48                                                                               | 0.00048 |
| STM3512         | gntT    | high-affinity gluconate permease               | -1.85                                                                              | 0.02645 | -3.24                                                                               | 0.00010 | -1.59                                                                               | 0.00623 |
| STM3513         | malQ    | 4-alpha-glucanotransferase                     | 1.12                                                                               | 0.03757 | -0.87                                                                               | 0.01589 | 2.08                                                                                | 0.00217 |
| STM3513         | malQ    | 4-alpha-glucanotransferase                     | 1.76                                                                               | 0.04582 | -1.02                                                                               | 0.02668 | 2.15                                                                                | 0.00176 |
| STM3514         | malP    | maltodextrin phosphorylase                     | 0.52                                                                               | 0.74788 | -0.29                                                                               | 0.55701 | 2.29                                                                                | 0.02073 |
| STM3514         | malP    | maltodextrin phosphorylase                     | -0.70                                                                              | 0.20566 | -0.72                                                                               | 0.06210 | 1.23                                                                                | 0.01404 |
| STM3515         | malT    | transcriptional regulator MalT                 | -1.51                                                                              | 0.03832 | -0.98                                                                               | 0.02055 | -0.41                                                                               | 0.29081 |
| STM3515         | malT    | transcriptional regulator MalT                 | -0.97                                                                              | 0.05998 | -0.49                                                                               | 0.11433 | -1.23                                                                               | 0.01007 |
| STM3516         | STM3516 | putative cytoplasmic protein                   | 0.29                                                                               | 0.70807 | 1.64                                                                                | 0.00928 | 2.02                                                                                | 0.02539 |
| STM3516         | STM3516 | putative cytoplasmic protein                   | -0.54                                                                              | 0.36389 | 0.51                                                                                | 0.23483 | -0.86                                                                               | 0.05147 |
| STM3517         | STM3517 | putative DNA-damage-inducible protein          | 0.28                                                                               | 0.58533 | 1.15                                                                                | 0.00417 | 1.08                                                                                | 0.01491 |
| STM3517         | STM3517 | putative DNA-damage-inducible protein          | 0.39                                                                               | 0.43648 | 0.86                                                                                | 0.01829 | 1.48                                                                                | 0.00608 |
| STM3518         | rtcA    | RNA 3'-terminal-phosphate cyclase              | 0.69                                                                               | 0.13168 | -0.47                                                                               | 0.42811 | -1.06                                                                               | 0.14787 |
| STM3518         | rtcA    | RNA 3'-terminal-phosphate cyclase              | 1.78                                                                               | 0.02146 | 0.02                                                                                | 0.97528 | -0.06                                                                               | 0.89807 |
| STM3519         | rtcB    | putative cytoplasmic protein                   | 0.72                                                                               | 0.12247 | 1.23                                                                                | 0.00769 | -0.02                                                                               | 0.95532 |
| STM3519         | rtcB    | putative cytoplasmic protein                   | 1.25                                                                               | 0.07388 | 1.33                                                                                | 0.00218 | 0.54                                                                                | 0.22998 |
| STM3521         | STM3521 | putative ribonucleoprotein related-protein     | -0.10                                                                              | 0.83479 | 2.34                                                                                | 0.00014 | -0.86                                                                               | 0.14413 |
| STM3521         | STM3521 | putative ribonucleoprotein related-protein     | 0.82                                                                               | 0.26862 | 2.47                                                                                | 0.00048 | 0.06                                                                                | 0.93090 |
| STM3522         | rtcR    | sigma N                                        | -2.24                                                                              | 0.00720 | -1.18                                                                               | 0.00824 | -1.63                                                                               | 0.00386 |
| STM3522         | rtcR    | sigma N                                        | -0.83                                                                              | 0.13203 | -0.74                                                                               | 0.04531 | -1.26                                                                               | 0.01062 |
| STM3523         | glpR    | glp operon transcriptional repressor           | -1.29                                                                              | 0.17944 | -1.92                                                                               | 0.00040 | -2.29                                                                               | 0.00038 |
| STM3523         | glpR    | glp operon transcriptional repressor           | -0.55                                                                              | 0.47591 | -1.68                                                                               | 0.00203 | -1.59                                                                               | 0.00740 |
| STM3524         | glpG    | glp regulon protein                            | -1.92                                                                              | 0.01177 | -1.22                                                                               | 0.00268 | -0.88                                                                               | 0.05474 |
| STM3524         | glpG    | glp regulon protein                            | -1.32                                                                              | 0.15306 | -1.46                                                                               | 0.00270 | -1.35                                                                               | 0.00694 |
| STM3525         | glpE    | thiosulfate sulfurtransferase                  | -2.46                                                                              | 0.00660 | -1.57                                                                               | 0.00209 | 0.17                                                                                | 0.67281 |
| STM3525         | glpE    | thiosulfate sulfurtransferase                  | -1.55                                                                              | 0.02148 | -1.03                                                                               | 0.01103 | 0.56                                                                                | 0.13771 |
| STM3526         | glpD    | sn-glycerol-3-phosphate dehydrogenase          | -1.60                                                                              | 0.03103 | 1.63                                                                                | 0.00240 | 2.17                                                                                | 0.00048 |
| STM3526         | glpD    | sn-glycerol-3-phosphate dehydrogenase          | -0.44                                                                              | 0.33225 | 1.38                                                                                | 0.00220 | 2.78                                                                                | 0.00041 |
| STM3527         | STM3527 | putative inner membrane protein                | -2.26                                                                              | 0.00947 | 0.31                                                                                | 0.41870 | 1.65                                                                                | 0.00251 |
| STM3527         | STM3527 | putative inner membrane protein                | -0.19                                                                              | 0.72718 | 0.96                                                                                | 0.02113 | 2.03                                                                                | 0.00115 |
| STM3528         | STM3528 | putative periplasmic phosphate-binding protein | -0.98                                                                              | 0.07739 | 0.09                                                                                | 0.81126 | 1.19                                                                                | 0.01612 |
| STM3528         | STM3528 | putative periplasmic phosphate-binding protein | 0.46                                                                               | 0.70228 | 0.26                                                                                | 0.51910 | 1.53                                                                                | 0.00210 |
| STM3529         | gldA    | glycerol dehydrogenase                         | 0.86                                                                               | 0.09484 | -2.08                                                                               | 0.00143 | -0.65                                                                               | 0.28012 |
| STM3529         | gldA    | glycerol dehydrogenase                         | 2.46                                                                               | 0.00660 | -1.35                                                                               | 0.02911 | 0.35                                                                                | 0.48258 |
| STM3531         | STM3531 | putative dihydroxyacid dehydratase             | -0.28                                                                              | 0.70969 | 0.14                                                                                | 0.82426 | 0.79                                                                                | 0.21804 |
| STM3531         | STM3531 | putative dihydroxyacid dehydratase             | 0.43                                                                               | 0.38733 | -0.27                                                                               | 0.50209 | 0.39                                                                                | 0.26074 |
| STM3532         | STM3532 | putative dihydrodipicolinate synthetase        | 0.64                                                                               | 0.20778 | -0.33                                                                               | 0.42232 | 0.20                                                                                | 0.63347 |
| STM3532         | STM3532 | putative dihydrodipicolinate synthetase        | 1.05                                                                               | 0.16421 | -0.16                                                                               | 0.79961 | -0.64                                                                               | 0.13286 |
| STM3533         | STM3533 | putative transcriptional regulator             | -0.13                                                                              | 0.80836 | 0.08                                                                                | 0.82574 | -1.47                                                                               | 0.02552 |
| STM3533         | STM3533 | putative transcriptional regulator             | 0.31                                                                               | 0.65238 | 0.13                                                                                | 0.69958 | -1.45                                                                               | 0.06520 |
| STM3534         | glgP    | glycogen phosphorylase                         | -0.42                                                                              | 0.54550 | -0.08                                                                               | 0.85609 | 0.55                                                                                | 0.18597 |
| STM3534         | glgP    | glycogen phosphorylase                         | 1.58                                                                               | 0.27112 | 0.44                                                                                | 0.34003 | 1.06                                                                                | 0.20367 |
| STM3535         | glgA    | glycogen synthase                              | -0.83                                                                              | 0.10464 | 1.00                                                                                | 0.00546 | 0.57                                                                                | 0.16052 |
| STM3535         | glgA    | glycogen synthase                              | -0.10                                                                              | 0.83254 | 1.08                                                                                | 0.00579 | 0.86                                                                                | 0.03189 |
| STM3536         | glgC    | glucose-1-phosphate adenyltransferase          | -0.57                                                                              | 0.53960 | 1.27                                                                                | 0.00372 | 0.95                                                                                | 0.05884 |
| STM3536         | glgC    | glucose-1-phosphate adenyltransferase          | -0.41                                                                              | 0.69269 | 1.36                                                                                | 0.00202 | 1.08                                                                                | 0.02680 |
| STM3537         | glgX    | glycogen debranching enzyme                    | -0.96                                                                              | 0.17998 | 0.93                                                                                | 0.02127 | 0.00                                                                                | 0.99405 |
| STM3537         | glgX    | glycogen debranching enzyme                    | 0.57                                                                               | 0.19566 | 0.74                                                                                | 0.07369 | 0.94                                                                                | 0.02806 |
| STM3538         | glgB    | glycogen branching enzyme                      | -0.71                                                                              | 0.58445 | -1.99                                                                               | 0.01685 | -2.97                                                                               | 0.01841 |
| STM3538         | glgB    | glycogen branching enzyme                      | -0.73                                                                              | 0.52711 | -3.55                                                                               | 0.00006 | -2.52                                                                               | 0.01809 |
| STM3539         | asd     | aspartate-semialdehyde dehydrogenase           | -0.35                                                                              | 0.42804 | -0.12                                                                               | 0.65689 | -0.71                                                                               | 0.11913 |
| STM3539         | asd     | aspartate-semialdehyde dehydrogenase           | 1.38                                                                               | 0.11193 | 0.39                                                                                | 0.26260 | 0.32                                                                                | 0.61721 |
| STM3541         | gntU    | low-affinity gluconate permease                | -0.57                                                                              | 0.45214 | -0.50                                                                               | 0.16073 | -0.80                                                                               | 0.37964 |
| STM3541         | gntU    | low-affinity gluconate permease                | 0.41                                                                               | 0.42672 | -0.32                                                                               | 0.39875 | -0.33                                                                               | 0.34465 |
| STM3542         | gntK    | gluconate kinase 2                             | -0.88                                                                              | 0.10574 | -1.76                                                                               | 0.00261 | -1.60                                                                               | 0.01353 |
| STM3542         | gntK    | gluconate kinase 2                             | -0.24                                                                              | 0.72148 | -2.18                                                                               | 0.00319 | -0.85                                                                               | 0.20928 |

**Table S2.** Genome-wide expression of *Salmonella enterica* serovar Typhimurium inside fibroblasts

Intracellular WT 24 h p.i.      Intracellular *phoP* 24 h p.i.      Extracellular WT stationary phase

Relative to WT exponential LB      Relative to *phoP* exponential LB      Relative to WT exponential LB



| Systematic name | Gene       | Product                                             | log2Ratio (M) | p value | log2Ratio (M) | p value | log2Ratio (M) | p value |
|-----------------|------------|-----------------------------------------------------|---------------|---------|---------------|---------|---------------|---------|
| STM3543         | gntR       | gluconate operon transcriptional repressor          | -1.09         | 0.04548 | -0.99         | 0.02466 | -1.42         | 0.02074 |
| STM3543         | gntR       | gluconate operon transcriptional repressor          | -0.47         | 0.28048 | -1.10         | 0.10477 | -0.83         | 0.05032 |
| STM3544         | yhhW       | putative cytoplasmic protein                        | -0.68         | 0.14190 | -0.39         | 0.26118 | 0.46          | 0.36050 |
| STM3544         | yhhW       | putative cytoplasmic protein                        | 1.17          | 0.15688 | -0.73         | 0.21172 | 0.35          | 0.41422 |
| STM3545         | yhhX       | putative oxidoreductase                             | 0.32          | 0.45046 | 0.09          | 0.81981 | -0.24         | 0.50112 |
| STM3545         | yhhX       | putative oxidoreductase                             | 0.70          | 0.24803 | -0.32         | 0.33116 | 1.35          | 0.04710 |
| STM3546         | yhhY       | putative transferase                                | -0.33         | 0.75563 | 0.47          | 0.27018 | 0.20          | 0.83143 |
| STM3546         | yhhY       | putative transferase                                | 0.80          | 0.16140 | -0.64         | 0.11782 | 0.65          | 0.44233 |
| STM3547,Sc      | STM3547,Sc | putative transcriptional regulator                  | -0.97         | 0.49348 | -0.99         | 0.01691 | 0.23          | 0.71910 |
| STM3547,Sc      | STM3547,Sc | putative transcriptional regulator                  | 2.94          | 0.00753 | 0.29          | 0.38602 | 2.61          | 0.00319 |
| STM3548         | STM3548    | putative cytoplasmic protein                        | 1.22          | 0.52384 | 0.27          | 0.46280 | -1.64         | 0.01188 |
| STM3548         | STM3548    | putative cytoplasmic protein                        | 0.28          | 0.67877 | -0.46         | 0.32674 | -0.58         | 0.29650 |
| STM3549         | STM3549    | putative inner membrane protein                     | 0.37          | 0.49184 | -0.08         | 0.83702 | 0.32          | 0.72474 |
| STM3549         | STM3549    | putative inner membrane protein                     | 0.99          | 0.12877 | -0.07         | 0.89485 | 0.30          | 0.60178 |
| STM3550         | STM3550    | putative phosphotriesterase                         | -0.05         | 0.91401 | 0.95          | 0.01881 | 0.44          | 0.20725 |
| STM3550         | STM3550    | putative phosphotriesterase                         | 0.75          | 0.30712 | 0.84          | 0.03304 | 1.64          | 0.00664 |
| STM3551         | ggt        | gamma-glutamyltranspeptidase                        | 0.19          | 0.83757 | 2.16          | 0.00016 | 1.81          | 0.03983 |
| STM3551         | ggt        | gamma-glutamyltranspeptidase                        | 0.67          | 0.41249 | 1.25          | 0.00437 | 1.74          | 0.00357 |
| STM3552         | yhhA       | putative outer membrane protein                     | 1.14          | 0.17300 | 3.35          | 0.00008 | 4.72          | 0.00003 |
| STM3552         | yhhA       | putative outer membrane protein                     | 1.89          | 0.15061 | 3.12          | 0.00006 | 5.67          | 0.00003 |
| STM3553         | ugpQ       | cytoplasmic glycerophosphodiester phosphodiesterase | -0.22         | 0.71326 | 2.11          | 0.00058 | 3.90          | 0.00006 |
| STM3553         | ugpQ       | cytoplasmic glycerophosphodiester phosphodiesterase | 2.48          | 0.18287 | 2.59          | 0.00032 | 4.25          | 0.00005 |
| STM3554         | ugpC       | sn-glycerol 3-phosphate transport protein           | -0.63         | 0.19001 | 0.96          | 0.02475 | 0.11          | 0.78783 |
| STM3554         | ugpC       | sn-glycerol 3-phosphate transport protein           | 0.13          | 0.80007 | 1.13          | 0.00552 | 0.78          | 0.08020 |
| STM3555         | ugpE       | sn-glycerol 3-phosphate transport protein           | 0.27          | 0.57100 | 1.55          | 0.00126 | 1.86          | 0.10506 |
| STM3555         | ugpE       | sn-glycerol 3-phosphate transport protein           | 0.42          | 0.39851 | 1.61          | 0.00090 | 0.64          | 0.26594 |
| STM3556         | ugpA       | sn-glycerol 3-phosphate transport protein           | -0.35         | 0.56465 | 0.80          | 0.05574 | -0.05         | 0.94036 |
| STM3556         | ugpA       | sn-glycerol 3-phosphate transport protein           | -0.91         | 0.31093 | 0.72          | 0.06187 | -0.45         | 0.30091 |
| STM3557         | ugpB       | sn-glycerol 3-phosphate transport protein           | 0.10          | 0.85641 | 4.07          | 0.00009 | 2.19          | 0.00458 |
| STM3557         | ugpB       | sn-glycerol 3-phosphate transport protein           | 1.86          | 0.01519 | 4.40          | 0.00002 | 2.68          | 0.00020 |
| STM3558         | STM3558    | death-on-curing protein                             | 4.75          | 0.01114 | 1.11          | 0.03230 | 1.40          | 0.19577 |
| STM3558         | STM3558    | death-on-curing protein                             | 4.49          | 0.00512 | 1.46          | 0.00223 | 0.78          | 0.15374 |
| STM3559         | yhhV       | putative cytoplasmic protein                        | 1.30          | 0.21827 | 1.40          | 0.00479 | 0.57          | 0.13870 |
| STM3559         | yhhV       | putative cytoplasmic protein                        | 1.19          | 0.39416 | 1.21          | 0.00528 | 1.20          | 0.00890 |
| STM3560         | livF       | high-affinity branched-chain amino acid transporter | -0.33         | 0.52677 | -0.39         | 0.18987 | -0.82         | 0.12032 |
| STM3560         | livF       | high-affinity branched-chain amino acid transporter | 1.14          | 0.10566 | 0.26          | 0.52399 | -0.26         | 0.62655 |
| STM3561         | livG       | high-affinity branched-chain amino acid transporter | 0.78          | 0.51827 | -0.17         | 0.64724 | -0.54         | 0.31770 |
| STM3561         | livG       | high-affinity branched-chain amino acid transporter | 1.98          | 0.10004 | 0.22          | 0.43604 | 0.47          | 0.25508 |
| STM3562         | livM       | high-affinity branched-chain amino acid transporter | -0.10         | 0.91891 | 0.46          | 0.25593 | -0.57         | 0.26266 |
| STM3562         | livM       | high-affinity branched-chain amino acid transporter | 0.98          | 0.19734 | -0.12         | 0.72596 | 0.35          | 0.57912 |
| STM3563         | livH       | high-affinity branched-chain amino acid transporter | 0.40          | 0.76732 | -0.44         | 0.29370 | -0.12         | 0.86464 |
| STM3563         | livH       | high-affinity branched-chain amino acid transporter | 0.64          | 0.15955 | -1.23         | 0.01565 | -0.35         | 0.51233 |
| STM3564         | livK       | high-affinity branched-chain amino acid transporter | -1.12         | 0.08009 | -0.46         | 0.34745 | -1.26         | 0.08572 |
| STM3564         | livK       | high-affinity branched-chain amino acid transporter | -0.46         | 0.42507 | -0.55         | 0.16827 | -0.51         | 0.22426 |
| STM3565         | yhhK       | putative acetyltransferase                          | -0.14         | 0.87497 | -0.56         | 0.18350 | -0.76         | 0.07576 |
| STM3565         | yhhK       | putative acetyltransferase                          | -0.66         | 0.43305 | -1.32         | 0.00270 | -3.43         | 0.00024 |
| STM3567         | livJ       | high-affinity branched-chain amino acid transporter | -0.53         | 0.39473 | 0.50          | 0.19402 | -0.11         | 0.84807 |
| STM3567         | livJ       | high-affinity branched-chain amino acid transporter | 1.19          | 0.46005 | 1.08          | 0.18105 | 3.84          | 0.00006 |
| STM3568         | rpoH       | RNA polymerase sigma factor                         | 0.94          | 0.06625 | 1.67          | 0.00537 | -1.00         | 0.02091 |
| STM3568         | rpoH       | RNA polymerase sigma factor                         | 2.43          | 0.00901 | 2.61          | 0.00036 | -0.11         | 0.75966 |
| STM3569         | ftsX       | putative cell division protein                      | -0.80         | 0.14212 | -0.36         | 0.44499 | -2.46         | 0.00048 |
| STM3569         | ftsX       | putative cell division protein                      | -1.27         | 0.04285 | -0.30         | 0.28895 | -1.29         | 0.04394 |
| STM3570         | ftsE       | putative cell division ATPase                       | -1.98         | 0.01172 | -1.04         | 0.00898 | -2.80         | 0.00012 |
| STM3570         | ftsE       | putative cell division ATPase                       | -1.21         | 0.28620 | -0.99         | 0.02034 | -2.25         | 0.00035 |
| STM3571         | ftsY       | cell division membrane protein                      | -2.27         | 0.01171 | -1.19         | 0.00358 | -2.15         | 0.00038 |
| STM3571         | ftsY       | cell division membrane protein                      | -1.67         | 0.02299 | -0.77         | 0.03523 | -1.07         | 0.04187 |
| STM3572         | yhhF       | putative methyltransferase                          | -1.76         | 0.01908 | -1.13         | 0.02134 | -2.63         | 0.00023 |
| STM3572         | yhhF       | putative methyltransferase                          | -0.51         | 0.24950 | -1.18         | 0.00375 | -1.76         | 0.00500 |
| STM3573         | yhhL       | putative inner membrane protein                     | 0.19          | 0.64308 | -0.16         | 0.79553 | -0.24         | 0.71719 |
| STM3573         | yhhL       | putative inner membrane protein                     | -1.04         | 0.05517 | -0.73         | 0.07013 | -1.32         | 0.05310 |
| STM3574         | yhhM       | putative inner membrane protein                     | -0.95         | 0.07418 | -0.09         | 0.80914 | -0.51         | 0.46122 |
| STM3574         | yhhM       | putative inner membrane protein                     | -0.83         | 0.09954 | 0.02          | 0.95587 | -1.02         | 0.03152 |
| STM3575         | yhhN       | putative inner membrane protein                     | -0.55         | 0.22704 | 0.21          | 0.51971 | 0.08          | 0.87984 |
| STM3575         | yhhN       | putative inner membrane protein                     | 0.76          | 0.17908 | -0.68         | 0.08462 | 0.18          | 0.72188 |
| STM3576         | zntA       | Pb/Cd/Zn/Hg-transporting ATPase                     | -0.10         | 0.87305 | 0.85          | 0.04575 | -1.07         | 0.05609 |
| STM3576         | zntA       | Pb/Cd/Zn/Hg-transporting ATPase                     | -0.49         | 0.62964 | 0.94          | 0.03802 | -1.42         | 0.13854 |
| STM3577         | tcp        | methyl-accepting transmembrane citrate/phenol       | -1.03         | 0.14495 | -0.30         | 0.33936 | -1.33         | 0.12680 |
| STM3577         | tcp        | methyl-accepting transmembrane citrate/phenol       | 1.17          | 0.31088 | -1.05         | 0.01299 | -1.57         | 0.01412 |
| STM3578         | yhhP       | hypothetical protein STM3578                        | -0.68         | 0.24145 | -1.60         | 0.00095 | -2.36         | 0.00035 |
| STM3578         | yhhP       | hypothetical protein STM3578                        | -1.40         | 0.21975 | -1.16         | 0.01299 | -2.07         | 0.00449 |

**Table S2.** Genome-wide expression of *Salmonella enterica* serovar Typhimurium inside fibroblasts

Intracellular WT 24 h p.i.      Intracellular *phoP* 24 h p.i.      Extracellular WT stationary phase

Relative to WT exponential LB      Relative to *phoP* exponential LB      Relative to WT exponential LB



| Systematic name | Gene    | Product                                             | log2Ratio (M) | p value | log2Ratio (M) | p value | log2Ratio (M) | p value |
|-----------------|---------|-----------------------------------------------------|---------------|---------|---------------|---------|---------------|---------|
| STM3579         | yhhQ    | putative integral membrane protein                  | -0.62         | 0.20826 | -0.63         | 0.09192 | -1.42         | 0.00517 |
| STM3579         | yhhQ    | putative integral membrane protein                  | -0.04         | 0.92137 | -0.64         | 0.05009 | -0.41         | 0.32603 |
| STM3580         | STM3580 | putative inner membrane lipoprotein                 | 0.08          | 0.86536 | -0.08         | 0.84438 | -0.08         | 0.88000 |
| STM3580         | STM3580 | putative inner membrane lipoprotein                 | 0.92          | 0.15734 | -0.18         | 0.52818 | 0.46          | 0.36005 |
| STM3581,S       | yhhS    | hypothetical protein STM3581,S                      | -0.75         | 0.23689 | -0.69         | 0.06483 | -1.19         | 0.01817 |
| STM3581,S       | yhhS    | hypothetical protein STM3581,S                      | 0.07          | 0.92137 | -0.50         | 0.18762 | -0.86         | 0.08201 |
| STM3582         | yhhT    | putative permease                                   | 1.88          | 0.01814 | -0.25         | 0.76700 | 0.63          | 0.60776 |
| STM3582         | yhhT    | putative permease                                   | 0.80          | 0.15459 | -1.21         | 0.01129 | -0.17         | 0.71291 |
| STM3583         | acpT    | putative phosphopantetheinyl transferase            | 3.08          | 0.19917 | -0.75         | 0.05929 | 0.86          | 0.37291 |
| STM3583         | acpT    | putative phosphopantetheinyl transferase            | 0.45          | 0.69269 | -1.26         | 0.00525 | -0.52         | 0.29769 |
| STM3584         | nikR    | nickel responsive regulator                         | -0.54         | 0.29437 | 0.39          | 0.21455 | -2.39         | 0.00341 |
| STM3584         | nikR    | nickel responsive regulator                         | -0.52         | 0.33225 | -0.12         | 0.72185 | -0.71         | 0.35738 |
| STM3585         | yhhJ    | putative ABC transport protein                      | -0.08         | 0.94892 | -1.12         | 0.04646 | -0.85         | 0.31442 |
| STM3585         | yhhJ    | putative ABC transport protein                      | 0.01          | 0.98229 | -1.69         | 0.00075 | -0.27         | 0.48077 |
| STM3586,S       | yhiH    | putative ABC-type multidrug transport system ATPase | -0.07         | 0.88528 | 0.07          | 0.89335 | -0.87         | 0.24317 |
| STM3586,S       | yhiH    | putative ABC-type multidrug transport system ATPase | -0.11         | 0.86483 | -1.24         | 0.00796 | -0.59         | 0.22619 |
| STM3587         | yhiI    | hypothetical protein STM3587                        | -0.87         | 0.09567 | -0.60         | 0.05200 | -0.54         | 0.14930 |
| STM3587         | yhiI    | hypothetical protein STM3587                        | 0.20          | 0.80007 | -0.89         | 0.02329 | 0.48          | 0.34686 |
| STM3588         | yhiN    | putative periplasmic protein                        | -0.50         | 0.34131 | -0.98         | 0.01633 | -0.90         | 0.08629 |
| STM3588         | yhiN    | putative periplasmic protein                        | 0.37          | 0.62264 | -1.42         | 0.00226 | -0.67         | 0.24548 |
| STM3589         | pitA    | low-affinity phosphate transporter                  | -1.00         | 0.08528 | -0.89         | 0.02519 | -1.23         | 0.01084 |
| STM3589         | pitA    | low-affinity phosphate transporter                  | -0.76         | 0.30885 | -0.72         | 0.04035 | -0.22         | 0.58025 |
| STM3590         | uspB    | universal stress protein UspB                       | -0.92         | 0.05888 | 0.20          | 0.57880 | 1.07          | 0.02167 |
| STM3590         | uspB    | universal stress protein UspB                       | 0.90          | 0.12765 | 0.75          | 0.04939 | 1.82          | 0.00484 |
| STM3591         | uspA    | universal stress protein A                          | -2.29         | 0.02316 | 0.53          | 0.17418 | 0.74          | 0.04585 |
| STM3591         | uspA    | universal stress protein A                          | -1.37         | 0.02423 | 1.03          | 0.03672 | 1.31          | 0.00625 |
| STM3592         | yhiP    | putative peptide transport protein                  | -1.27         | 0.08730 | -1.05         | 0.03391 | -1.82         | 0.00685 |
| STM3592         | yhiP    | putative peptide transport protein                  | 0.28          | 0.69139 | 0.84          | 0.59387 | -0.50         | 0.30575 |
| STM3593         | yhiQ    | putative SAM-dependent methyltransferase            | -1.23         | 0.17650 | -1.07         | 0.00579 | -1.13         | 0.13695 |
| STM3593         | yhiQ    | putative SAM-dependent methyltransferase            | -1.24         | 0.05920 | -0.53         | 0.18764 | -2.01         | 0.00626 |
| STM3594         | prlC    | oligopeptidase A                                    | -1.68         | 0.01212 | -0.73         | 0.04956 | -0.86         | 0.03378 |
| STM3594         | prlC    | oligopeptidase A                                    | -0.72         | 0.20634 | -0.67         | 0.05349 | 0.09          | 0.83143 |
| STM3595         | STM3595 | putative phosphatase                                | -0.67         | 0.14161 | -0.60         | 0.06645 | -2.17         | 0.00038 |
| STM3595         | STM3595 | putative phosphatase                                | -0.06         | 0.89465 | -0.68         | 0.04174 | -1.47         | 0.00714 |
| STM3596         | yhiR    | putative cytoplasmic protein                        | -2.06         | 0.02394 | -0.84         | 0.04882 | -2.71         | 0.00121 |
| STM3596         | yhiR    | putative cytoplasmic protein                        | -0.77         | 0.15787 | -0.71         | 0.06536 | -2.21         | 0.00063 |
| STM3597         | gor     | glutathione reductase                               | -1.18         | 0.04720 | -0.05         | 0.87339 | -0.54         | 0.28709 |
| STM3597         | gor     | glutathione reductase                               | -0.76         | 0.38860 | -0.35         | 0.32622 | 0.16          | 0.93356 |
| STM3598         | STM3598 | putative L-asparaginase                             | -1.62         | 0.04923 | -0.22         | 0.56841 | -2.17         | 0.00210 |
| STM3598         | STM3598 | putative L-asparaginase                             | 0.22          | 0.65246 | -0.06         | 0.86476 | -1.74         | 0.00404 |
| STM3599         | STM3599 | anaerobic C4-dicarboxylate transporter              | 1.47          | 0.10017 | 0.75          | 0.13448 | -0.99         | 0.06223 |
| STM3599         | STM3599 | anaerobic C4-dicarboxylate transporter              | 1.14          | 0.14590 | 0.74          | 0.11673 | 0.57          | 0.31515 |
| STM3600         | STM3600 | putative sugar kinase                               | -0.22         | 0.63301 | -0.90         | 0.02561 | -1.25         | 0.03141 |
| STM3600         | STM3600 | putative sugar kinase                               | 0.51          | 0.43483 | -1.57         | 0.00383 | 0.34          | 0.63350 |
| STM3601         | STM3601 | putative phosphosugar isomerase                     | 0.31          | 0.61449 | 0.47          | 0.29431 | -0.40         | 0.36349 |
| STM3601         | STM3601 | putative phosphosugar isomerase                     | 0.94          | 0.07565 | 0.42          | 0.20221 | 0.75          | 0.06536 |
| STM3602         | STM3602 | putative regulatory protein                         | 0.58          | 0.37554 | 1.67          | 0.00280 | 1.51          | 0.01188 |
| STM3602         | STM3602 | putative regulatory protein                         | 0.21          | 0.75166 | 0.24          | 0.54396 | 0.39          | 0.42219 |
| STM3603         | treF    | cytoplasmic trehalase                               | -0.55         | 0.25906 | 0.35          | 0.27764 | 0.51          | 0.25754 |
| STM3603         | treF    | cytoplasmic trehalase                               | -0.02         | 0.96815 | -0.45         | 0.10092 | 0.41          | 0.32535 |
| STM3604         | STM3604 | putative inner membrane protein                     | 0.82          | 0.10890 | 0.04          | 0.92774 | -0.46         | 0.51260 |
| STM3604         | STM3604 | putative inner membrane protein                     | 2.01          | 0.01019 | -0.41         | 0.20001 | 0.74          | 0.07085 |
| STM3605         | STM3605 | putative phage endolysin                            | -1.34         | 0.02909 | -0.35         | 0.58314 | -1.79         | 0.00518 |
| STM3605         | STM3605 | putative phage endolysin                            | 0.28          | 0.66545 | 1.03          | 0.06017 | -1.42         | 0.01436 |
| STM3606         | yhjB    | putative transcriptional regulator                  | -0.15         | 0.83625 | 0.89          | 0.02005 | 1.75          | 0.01421 |
| STM3606         | yhjB    | putative transcriptional regulator                  | 1.02          | 0.18692 | 0.83          | 0.10482 | 1.59          | 0.09535 |
| STM3607         | yhjC    | putative transcriptional regulator                  | 0.70          | 0.33719 | 0.48          | 0.31019 | -0.32         | 0.53394 |
| STM3607         | yhjC    | putative transcriptional regulator                  | 1.07          | 0.14326 | 0.58          | 0.24386 | 0.95          | 0.06382 |
| STM3608         | yhjD    | putative tRNA-processing ribonuclease               | -0.43         | 0.49184 | -0.26         | 0.45604 | -1.23         | 0.01311 |
| STM3608         | yhjD    | putative tRNA-processing ribonuclease               | 0.90          | 0.36043 | -0.99         | 0.01753 | -0.39         | 0.53138 |
| STM3609         | yhjE    | putative transport protein                          | -0.43         | 0.32444 | -0.01         | 0.98628 | 0.37          | 0.37700 |
| STM3609         | yhjE    | putative transport protein                          | 1.01          | 0.56646 | 0.12          | 0.77342 | 0.73          | 0.10351 |
| STM3610         | yhjG    | putative inner membrane protein                     | -0.63         | 0.19533 | 1.34          | 0.05619 | 1.71          | 0.00322 |
| STM3610         | yhjG    | putative inner membrane protein                     | 0.90          | 0.47086 | -0.29         | 0.48388 | 1.11          | 0.29146 |
| STM3611         | yhjH    | hypothetical protein STM3611                        | -1.16         | 0.27983 | -2.82         | 0.00131 | -0.12         | 0.82498 |
| STM3611         | yhjH    | hypothetical protein STM3611                        | -1.27         | 0.09362 | -0.09         | 0.92012 | -0.33         | 0.65347 |
| STM3612         | kdgK    | ketodeoxygluconokinase                              | -1.26         | 0.03893 | -0.96         | 0.00978 | -0.71         | 0.11151 |
| STM3612         | kdgK    | ketodeoxygluconokinase                              | -1.43         | 0.02303 | -0.48         | 0.11555 | -2.02         | 0.00155 |
| STM3613         | yhjJ    | putative Zn-dependent peptidase                     | -0.81         | 0.46481 | -1.25         | 0.00355 | -0.84         | 0.30373 |
| STM3613         | yhjJ    | putative Zn-dependent peptidase                     | -0.12         | 0.78280 | -0.73         | 0.05922 | -1.00         | 0.05468 |

**Table S2.** Genome-wide expression of *Salmonella enterica* serovar Typhimurium inside fibroblasts

Intracellular WT 24 h.p.i.      Intracellular *phoP* 24 h.p.i.      Extracellular WT stationary phase

Relative to WT exponential LB      Relative to *phoP* exponential LB      Relative to WT exponential LB



| Systematic name | Gene     | Product                                                | log2Ratio (M) | p value | log2Ratio (M) | p value | log2Ratio (M) | p value |
|-----------------|----------|--------------------------------------------------------|---------------|---------|---------------|---------|---------------|---------|
| STM3614         | dctA     | C4-dicarboxylate transport protein                     | -1.28         | 0.03218 | -1.20         | 0.02972 | -2.63         | 0.00645 |
| STM3614         | dctA     | C4-dicarboxylate transport protein                     | -0.33         | 0.49704 | -0.53         | 0.20143 | 0.24          | 0.80516 |
| STM3615         | yhjK     | putative diguanylate cyclase/phosphodiesterase         | -0.76         | 0.19221 | 0.14          | 0.71333 | 0.33          | 0.43281 |
| STM3615         | yhjK     | putative diguanylate cyclase/phosphodiesterase         | -0.09         | 0.85980 | 0.59          | 0.46930 | 0.16          | 0.70871 |
| STM3616         | yhjL     | tetratricopeptide repeat protein                       | 0.18          | 0.83757 | -0.89         | 0.05044 | -0.97         | 0.17427 |
| STM3616         | yhjL     | tetratricopeptide repeat protein                       | -0.10         | 0.86668 | -1.29         | 0.00177 | -0.45         | 0.35814 |
| STM3617         | STM3617  | endo-1,4-D-glucanase                                   | -2.37         | 0.00747 | -1.49         | 0.00513 | -1.03         | 0.07731 |
| STM3617         | STM3617  | endo-1,4-D-glucanase                                   | -1.37         | 0.02258 | -0.99         | 0.01671 | -0.99         | 0.08841 |
| STM3618         | yhjN     | putative cellulose synthase                            | -1.68         | 0.01337 | -0.86         | 0.04189 | -1.37         | 0.00649 |
| STM3618         | yhjN     | putative cellulose synthase                            | -2.88         | 0.01636 | -1.33         | 0.00221 | -4.20         | 0.00009 |
| STM3619         | yhjO     | glycosyltransferase                                    | -1.34         | 0.02526 | -1.20         | 0.00269 | -2.62         | 0.00136 |
| STM3619         | yhjO     | glycosyltransferase                                    | -0.47         | 0.67071 | -1.61         | 0.00070 | -1.86         | 0.01077 |
| STM3620         | yhjQ     | putative chromosome partitioning ATPase                | -0.68         | 0.17875 | -0.11         | 0.87427 | -1.94         | 0.00111 |
| STM3620         | yhjQ     | putative chromosome partitioning ATPase                | 0.29          | 0.63895 | -1.18         | 0.00701 | -1.05         | 0.02888 |
| STM3621         | yhjR     | putative cytoplasmic protein                           | -1.00         | 0.09937 | -0.48         | 0.21341 | -1.25         | 0.02077 |
| STM3621         | yhjR     | putative cytoplasmic protein                           | -0.07         | 0.91699 | -0.25         | 0.39449 | -0.98         | 0.04885 |
| STM3622         | yhjS     | putative cytoplasmic protein                           | -2.03         | 0.00802 | -0.88         | 0.05632 | -0.97         | 0.03475 |
| STM3622         | yhjS     | putative cytoplasmic protein                           | -0.24         | 0.72641 | -1.03         | 0.00506 | -0.78         | 0.12691 |
| STM3623         | yhjT     | putative inner membrane protein                        | -1.93         | 0.01279 | -1.21         | 0.01875 | -1.30         | 0.03798 |
| STM3623         | yhjT     | putative inner membrane protein                        | 0.57          | 0.63041 | -1.27         | 0.01167 | 0.02          | 0.97512 |
| STM3624         | yhjU     | putative inner membrane protein                        | -2.43         | 0.00921 | -0.80         | 0.06054 | -2.23         | 0.00102 |
| STM3624         | yhjU     | putative inner membrane protein                        | -1.19         | 0.08078 | -0.38         | 0.24818 | -1.74         | 0.00157 |
| STM3624A        | STM3624A | cystathionine gamma-synthase                           | -1.54         | 0.03083 | -0.50         | 0.20843 | -2.00         | 0.01439 |
| STM3624A        | STM3624A | cystathionine gamma-synthase                           | -0.70         | 0.14011 | -0.86         | 0.05743 | -0.98         | 0.21358 |
| STM3625         | yhjV     | putative transport protein                             | 3.22          | 0.00704 | -1.39         | 0.00703 | 3.30          | 0.00013 |
| STM3625         | yhjV     | putative transport protein                             | 1.88          | 0.03379 | -1.56         | 0.00137 | 0.99          | 0.26122 |
| STM3626         | dppF     | dipeptide transport protein                            | 0.00          | 0.99180 | -0.59         | 0.07242 | 0.94          | 0.02688 |
| STM3626         | dppF     | dipeptide transport protein                            | 0.41          | 0.59763 | -0.46         | 0.53863 | -0.55         | 0.68835 |
| STM3627         | dppD     | dipeptide transport protein                            | 0.17          | 0.72937 | -0.06         | 0.95696 | 0.29          | 0.59962 |
| STM3627         | dppD     | dipeptide transport protein                            | 1.15          | 0.26685 | -0.93         | 0.05633 | 1.56          | 0.05037 |
| STM3628         | dppC     | dipeptide transport protein 2                          | -1.07         | 0.05303 | -0.59         | 0.16726 | -0.68         | 0.29622 |
| STM3628         | dppC     | dipeptide transport protein 2                          | 0.19          | 0.79719 | -0.95         | 0.02354 | -0.35         | 0.59986 |
| STM3629         | dppB     | dipeptide transport protein 1                          | 0.05          | 0.93391 | 0.28          | 0.43925 | 0.12          | 0.82986 |
| STM3629         | dppB     | dipeptide transport protein 1                          | 1.39          | 0.05865 | 0.37          | 0.41568 | 2.51          | 0.00088 |
| STM3630         | dppA     | dipeptide transport protein                            | -1.00         | 0.09445 | 2.36          | 0.00044 | 1.01          | 0.04132 |
| STM3630         | dppA     | dipeptide transport protein                            | 1.60          | 0.19621 | 2.12          | 0.00016 | 0.85          | 0.18122 |
| STM3631         | STM3631  | putative xanthine permease                             | 0.06          | 0.96120 | 0.36          | 0.30026 | 1.31          | 0.13645 |
| STM3631         | STM3631  | putative xanthine permease                             | 1.00          | 0.43980 | -0.38         | 0.51353 | 1.73          | 0.08142 |
| STM3632         | STM3632  | hypothetical protein STM3632                           | -0.37         | 0.52914 | -0.62         | 0.05563 | 0.05          | 0.90808 |
| STM3632         | STM3632  | hypothetical protein STM3632                           | -1.16         | 0.28741 | -1.39         | 0.00185 | -0.24         | 0.57254 |
| STM3633         | STM3633  | putative regulatory protein                            | -0.64         | 0.30115 | -0.82         | 0.04869 | -2.38         | 0.00594 |
| STM3633         | STM3633  | putative regulatory protein                            | -0.53         | 0.32756 | -0.46         | 0.19105 | -1.03         | 0.07769 |
| STM3634         | proK     | STM3634                                                | 0.73          | 0.29898 | -1.67         | 0.00663 | 0.03          | 0.95596 |
| STM3634         | proK     | STM3634                                                | 0.39          | 0.67601 | -1.24         | 0.00407 | 0.08          | 0.92513 |
| STM3635         | yhjW     | putative membrane-associated metal-dependent hydrolase | 0.77          | 0.26729 | 0.39          | 0.55009 | 0.10          | 0.84748 |
| STM3635         | yhjW     | putative membrane-associated metal-dependent hydrolase | 1.46          | 0.05704 | 0.61          | 0.07982 | 0.36          | 0.44761 |
| STM3636         | lpfE     | long polar fimbrial minor protein                      | 0.11          | 0.78589 | -0.22         | 0.53425 | -0.40         | 0.30176 |
| STM3636         | lpfE     | long polar fimbrial minor protein                      | 2.07          | 0.02352 | -0.47         | 0.14971 | 0.84          | 0.50804 |
| STM3637         | lpfD     | long polar fimbrial protein                            | -0.85         | 0.16697 | -0.63         | 0.22494 | 0.09          | 0.92078 |
| STM3637         | lpfD     | long polar fimbrial protein                            | 0.06          | 0.89601 | -0.98         | 0.01227 | -0.65         | 0.50497 |
| STM3638         | lpfC     | long polar fimbrial outer membrane usher protein       | -0.22         | 0.74962 | -0.83         | 0.01996 | -0.79         | 0.09289 |
| STM3638         | lpfC     | long polar fimbrial outer membrane usher protein       | 1.16          | 0.26729 | 0.04          | 0.90753 | -0.16         | 0.75232 |
| STM3639         | lpfB     | long polar fimbrial chaperone precursor                | -0.60         | 0.39885 | 0.01          | 0.97076 | 0.79          | 0.16977 |
| STM3639         | lpfB     | long polar fimbrial chaperone precursor                | 1.94          | 0.16050 | -0.15         | 0.86643 | 2.78          | 0.00032 |
| STM3640         | lpfA     | long polar fimbrial protein A precursor                | 2.16          | 0.06092 | 0.18          | 0.80656 | 1.49          | 0.01034 |
| STM3640         | lpfA     | long polar fimbrial protein A precursor                | 2.10          | 0.00935 | 0.19          | 0.67843 | 1.50          | 0.00488 |
| STM3641         | yhjY     | putative lipase                                        | -1.05         | 0.06721 | -0.35         | 0.31929 | -1.10         | 0.04176 |
| STM3641         | yhjY     | putative lipase                                        | -0.08         | 0.86346 | -0.03         | 0.94687 | 0.41          | 0.39325 |
| STM3642         | tag      | 3-methyl-adenine DNA glycosylase I                     | -0.28         | 0.75688 | 0.15          | 0.62123 | -0.37         | 0.42919 |
| STM3642         | tag      | 3-methyl-adenine DNA glycosylase I                     | 1.21          | 0.15341 | 0.26          | 0.34862 | -0.64         | 0.09842 |
| STM3643         | viaC     | putative acetyltransferase                             | 2.18          | 0.13710 | -1.02         | 0.02286 | -0.95         | 0.22236 |
| STM3643         | viaC     | putative acetyltransferase                             | 0.80          | 0.13228 | -1.25         | 0.01093 | -0.07         | 0.92963 |
| STM3644         | bisC     | biotin sulfoxide reductase                             | -1.34         | 0.04345 | -1.05         | 0.02230 | -0.49         | 0.31358 |
| STM3644         | bisC     | biotin sulfoxide reductase                             | -0.19         | 0.69462 | -0.73         | 0.03027 | -0.52         | 0.53435 |
| STM3645         | viaD     | putative outer membrane lipoprotein                    | 0.70          | 0.17300 | 0.55          | 0.09641 | -0.93         | 0.10506 |
| STM3645         | viaD     | putative outer membrane lipoprotein                    | 1.65          | 0.12475 | 0.56          | 0.15750 | -0.47         | 0.25744 |
| STM3646         | viaE     | 2-hydroxyacid dehydrogenase                            | 0.22          | 0.82206 | 0.37          | 0.24254 | 1.16          | 0.01495 |
| STM3646         | viaE     | 2-hydroxyacid dehydrogenase                            | 0.27          | 0.82543 | -0.09         | 0.77796 | 1.76          | 0.00193 |
| STM3647         | viaF     | putative outer membrane lipoprotein                    | -1.85         | 0.01955 | -0.48         | 0.12765 | -1.72         | 0.00991 |
| STM3647         | viaF     | putative outer membrane lipoprotein                    | -0.33         | 0.52349 | -0.60         | 0.08862 | -0.68         | 0.13943 |

**Table S2.** Genome-wide expression of *Salmonella enterica* serovar Typhimurium inside fibroblasts

Intracellular WT 24 h p.i.      Intracellular *phoP* 24 h p.i.      Extracellular WT stationary phase

Relative to WT exponential LB      Relative to *phoP* exponential LB      Relative to WT exponential LB



| Systematic name | Gene    | Product                                            | log2Ratio (M) | p value | log2Ratio (M) | p value | log2Ratio (M) | p value |
|-----------------|---------|----------------------------------------------------|---------------|---------|---------------|---------|---------------|---------|
| STM3648         | yiaG    | putative transcriptional regulator                 | -0.18         | 0.67877 | 0.98          | 0.04450 | 2.91          | 0.00011 |
| STM3648         | yiaG    | putative transcriptional regulator                 | 0.08          | 0.88221 | 1.20          | 0.01200 | 4.03          | 0.00005 |
| STM3649         | cspA    | major cold shock protein                           | 0.07          | 0.94960 | 0.32          | 0.54635 | -1.31         | 0.19053 |
| STM3649         | cspA    | major cold shock protein                           | -0.95         | 0.10848 | 0.36          | 0.51733 | -1.57         | 0.00241 |
| STM3650         | STM3650 | hypothetical protein STM3650                       | -0.72         | 0.24896 | 0.30          | 0.49170 | -0.22         | 0.60042 |
| STM3650         | STM3650 | hypothetical protein STM3650                       | 0.81          | 0.21015 | 0.76          | 0.05739 | -0.11         | 0.76124 |
| STM3651         | STM3651 | putative acetyltransferase                         | 1.27          | 0.02737 | 1.58          | 0.00195 | -1.05         | 0.02520 |
| STM3651         | STM3651 | putative acetyltransferase                         | 1.65          | 0.02087 | 1.60          | 0.00100 | -1.24         | 0.05461 |
| STM3652         | STM3652 | putative cytoplasmic protein                       | 0.13          | 0.90917 | 1.31          | 0.00524 | -0.13         | 0.76393 |
| STM3652         | STM3652 | putative cytoplasmic protein                       | 0.15          | 0.86821 | 1.06          | 0.01242 | -1.87         | 0.01893 |
| STM3655         | glyS    | glycyl-tRNA synthetase beta subunit                | -1.66         | 0.05333 | -0.02         | 0.98411 | -0.70         | 0.07686 |
| STM3655         | glyS    | glycyl-tRNA synthetase beta subunit                | -1.72         | 0.01765 | -1.21         | 0.02560 | -1.41         | 0.02127 |
| STM3656         | glyQ    | glycyl-tRNA synthetase alpha subunit               | -3.02         | 0.01145 | -1.93         | 0.00042 | -3.74         | 0.00016 |
| STM3656         | glyQ    | glycyl-tRNA synthetase alpha subunit               | -2.11         | 0.02509 | -1.31         | 0.02255 | -3.73         | 0.00008 |
| STM3657         | STM3657 | putative outer membrane lipoprotein                | -1.90         | 0.00942 | -0.46         | 0.12276 | -1.23         | 0.00939 |
| STM3657         | STM3657 | putative outer membrane lipoprotein                | -1.31         | 0.04151 | -0.36         | 0.23782 | -1.40         | 0.01259 |
| STM3658         | yiaH    | putative inner membrane protein                    | -1.21         | 0.12128 | 0.14          | 0.74098 | -0.90         | 0.06181 |
| STM3658         | yiaH    | putative inner membrane protein                    | -1.13         | 0.08216 | -1.42         | 0.08181 | -0.12         | 0.89709 |
| STM3659         | yiaB    | putative inner membrane protein                    | 0.62          | 0.30073 | -0.80         | 0.04511 | -0.50         | 0.57201 |
| STM3659         | yiaB    | putative inner membrane protein                    | 2.14          | 0.01082 | -1.08         | 0.09039 | 2.15          | 0.00040 |
| STM3660         | xylB    | xylulokinase                                       | -0.82         | 0.45996 | -0.83         | 0.08582 | -0.15         | 0.80590 |
| STM3660         | xylB    | xylulokinase                                       | -0.51         | 0.64686 | -0.39         | 0.22080 | 0.27          | 0.68216 |
| STM3661         | xylA    | xylose isomerase                                   | -0.32         | 0.51063 | 0.18          | 0.65154 | 0.39          | 0.50693 |
| STM3661         | xylA    | xylose isomerase                                   | 5.87          | 0.00567 | 1.38          | 0.07216 | 1.61          | 0.03680 |
| STM3662         | xylR    | xylose operon regulatory protein                   | -1.31         | 0.03457 | 1.20          | 0.00507 | -0.23         | 0.57253 |
| STM3662         | xylR    | xylose operon regulatory protein                   | -0.38         | 0.43235 | 1.52          | 0.00077 | 0.51          | 0.18553 |
| STM3663         | bax     | putative ATP-binding protein                       | -1.64         | 0.02101 | 1.49          | 0.00296 | 0.82          | 0.15579 |
| STM3663         | bax     | putative ATP-binding protein                       | -0.78         | 0.17020 | 2.05          | 0.00026 | 0.81          | 0.05441 |
| STM3664         | malS    | periplasmic alpha-amylase precursor                | -0.17         | 0.78300 | -0.83         | 0.22093 | -0.11         | 0.89991 |
| STM3664         | malS    | periplasmic alpha-amylase precursor                | 1.51          | 0.07277 | -1.03         | 0.03365 | 0.71          | 0.19111 |
| STM3665         | avtA    | valine--pyruvate transaminase                      | -0.40         | 0.53192 | -1.06         | 0.01622 | -0.27         | 0.68201 |
| STM3665         | avtA    | valine--pyruvate transaminase                      | 1.17          | 0.04582 | -0.88         | 0.03599 | 0.34          | 0.69818 |
| STM3666         | ysaA    | putative oxidoreductase                            | -1.23         | 0.04161 | -1.39         | 0.00489 | -0.99         | 0.08442 |
| STM3666         | ysaA    | putative oxidoreductase                            | -0.31         | 0.54425 | -0.75         | 0.05356 | -1.44         | 0.00982 |
| STM3667         | yiaJ    | transcriptional repressor                          | -1.01         | 0.12518 | -0.32         | 0.28405 | -0.98         | 0.04336 |
| STM3667         | yiaJ    | transcriptional repressor                          | -0.04         | 0.96762 | -0.93         | 0.08234 | 0.07          | 0.86700 |
| STM3668         | yiaK    | putative malate dehydrogenase                      | -0.17         | 0.86752 | -0.67         | 0.07738 | -0.51         | 0.42495 |
| STM3668         | yiaK    | putative malate dehydrogenase                      | 0.43          | 0.57639 | -0.76         | 0.02771 | 0.12          | 0.79784 |
| STM3669         | yiaL    | putative cytoplasmic protein                       | -0.69         | 0.26979 | -0.38         | 0.26161 | -1.50         | 0.00871 |
| STM3669         | yiaL    | putative cytoplasmic protein                       | -0.10         | 0.90565 | -0.38         | 0.23132 | 0.38          | 0.45088 |
| STM3670         | STM3670 | putative chemotaxis protein                        | -0.55         | 0.49214 | 0.19          | 0.61574 | -0.99         | 0.14874 |
| STM3670         | STM3670 | putative chemotaxis protein                        | 0.72          | 0.59477 | -0.94         | 0.11132 | 0.27          | 0.57504 |
| STM3671         | yiaM    | putative transporter                               | -0.81         | 0.14738 | 0.17          | 0.62367 | 0.20          | 0.64223 |
| STM3671         | yiaM    | putative transporter                               | -0.50         | 0.43575 | -0.58         | 0.18482 | 0.10          | 0.86801 |
| STM3672         | yiaN    | hypothetical protein STM3672                       | -0.52         | 0.58781 | -0.06         | 0.87675 | -0.83         | 0.17618 |
| STM3672         | yiaN    | hypothetical protein STM3672                       | -1.03         | 0.19634 | -0.64         | 0.27846 | -0.20         | 0.65684 |
| STM3673         | yiaO    | putative periplasmic dicarboxylate-binding protein | 0.33          | 0.68248 | 0.27          | 0.46732 | -0.83         | 0.17093 |
| STM3673         | yiaO    | putative periplasmic dicarboxylate-binding protein | 1.49          | 0.04933 | -1.59         | 0.00090 | -0.39         | 0.77925 |
| STM3674         | lyxK    | L-xylulose kinase                                  | 0.50          | 0.56239 | 0.30          | 0.39743 | 1.77          | 0.02463 |
| STM3674         | lyxK    | L-xylulose kinase                                  | 1.21          | 0.12256 | 0.69          | 0.05828 | 0.97          | 0.06867 |
| STM3675         | sgbH    | putative 3-hexulose-6-phosphate isomerase          | -0.12         | 0.78220 | 0.55          | 0.29224 | -0.07         | 0.88009 |
| STM3675         | sgbH    | putative 3-hexulose-6-phosphate isomerase          | 2.30          | 0.00689 | -0.88         | 0.06350 | -0.02         | 0.96603 |
| STM3676         | sgbU    | putative 3-hexulose-6-phosphate isomerase          | -0.12         | 0.81631 | 0.34          | 0.45954 | -0.88         | 0.03016 |
| STM3676         | sgbU    | putative 3-hexulose-6-phosphate isomerase          | 1.13          | 0.05204 | -0.08         | 0.82309 | 0.70          | 0.11118 |
| STM3677         | sgbE    | L-ribulose-5-phosphate 4-epimerase                 | 0.22          | 0.69987 | 0.55          | 0.45382 | -0.40         | 0.54441 |
| STM3677         | sgbE    | L-ribulose-5-phosphate 4-epimerase                 | 0.83          | 0.27565 | -0.11         | 0.71246 | 0.29          | 0.54250 |
| STM3678         | STM3678 | putative regulatory protein                        | 0.54          | 0.34438 | -0.09         | 0.80553 | -0.62         | 0.12695 |
| STM3678         | STM3678 | putative regulatory protein                        | 0.88          | 0.29860 | -0.20         | 0.63301 | 1.11          | 0.21130 |
| STM3679         | STM3679 | putative cytoplasmic protein                       | 0.37          | 0.68543 | 1.10          | 0.00637 | 2.69          | 0.00107 |
| STM3679         | STM3679 | putative cytoplasmic protein                       | 0.76          | 0.14152 | 1.22          | 0.03130 | 3.45          | 0.00012 |
| STM3680         | aldB    | aldehyde dehydrogenase B                           | 1.30          | 0.20013 | 3.54          | 0.00005 | 5.75          | 0.00002 |
| STM3680         | aldB    | aldehyde dehydrogenase B                           | 1.77          | 0.06102 | 2.85          | 0.00016 | 6.67          | 0.00001 |
| STM3681         | STM3681 | putative transcriptional regulator                 | 0.05          | 0.94155 | -0.28         | 0.74213 | 0.90          | 0.06811 |
| STM3681         | STM3681 | putative transcriptional regulator                 | 0.72          | 0.22727 | -1.47         | 0.00309 | 1.24          | 0.01474 |
| STM3682         | selB    | selenocysteinyl-tRNA-specific translation factor   | -2.05         | 0.00796 | -0.50         | 0.18265 | -0.44         | 0.30244 |
| STM3682         | selB    | selenocysteinyl-tRNA-specific translation factor   | -0.93         | 0.18607 | -0.30         | 0.39889 | 0.47          | 0.18300 |
| STM3683         | selA    | selenocysteine synthase                            | -1.83         | 0.04098 | -0.96         | 0.02714 | -1.84         | 0.06733 |
| STM3683         | selA    | selenocysteine synthase                            | -0.90         | 0.07276 | -0.64         | 0.10840 | -0.91         | 0.09709 |
| STM3684         | yibF    | putative glutathione S-transferase                 | 0.45          | 0.70804 | 0.64          | 0.08085 | 0.84          | 0.03225 |
| STM3684         | yibF    | putative glutathione S-transferase                 | 2.85          | 0.25396 | 0.81          | 0.05000 | 1.45          | 0.00342 |

**Table S2.** Genome-wide expression of *Salmonella enterica* serovar Typhimurium inside fibroblasts

|                 |         |                                                      | Intracellular WT<br>24 h p.i.                                                      |         | Intracellular <i>phoP</i><br>24 h p.i.                                              |         | Extracellular WT<br>stationary phase                                                |         |
|-----------------|---------|------------------------------------------------------|------------------------------------------------------------------------------------|---------|-------------------------------------------------------------------------------------|---------|-------------------------------------------------------------------------------------|---------|
|                 |         |                                                      | Relative to WT<br>exponential LB                                                   |         | Relative to <i>phoP</i><br>exponential LB                                           |         | Relative to WT<br>exponential LB                                                    |         |
|                 |         |                                                      |  |         |  |         |  |         |
| Systematic name | Gene    | Product                                              | log2Ratio (M)                                                                      | p value | log2Ratio (M)                                                                       | p value | log2Ratio (M)                                                                       | p value |
| STM3685         | mtlA    | mannitol-specific enzyme IIABC component             | 0.62                                                                               | 0.17298 | 0.23                                                                                | 0.51814 | 0.26                                                                                | 0.56325 |
| STM3685         | mtlA    | mannitol-specific enzyme IIABC component             | -0.33                                                                              | 0.54389 | 0.40                                                                                | 0.26156 | 0.91                                                                                | 0.03977 |
| STM3686         | mtlD    | mannitol-1-phosphate 5-dehydrogenase                 | 0.98                                                                               | 0.11427 | -0.32                                                                               | 0.27468 | -0.42                                                                               | 0.54393 |
| STM3686         | mtlD    | mannitol-1-phosphate 5-dehydrogenase                 | 1.66                                                                               | 0.02357 | -1.07                                                                               | 0.00990 | 0.23                                                                                | 0.68573 |
| STM3687         | mtlR    | mannitol operon repressor                            | -1.73                                                                              | 0.06644 | -0.63                                                                               | 0.06689 | 1.31                                                                                | 0.01776 |
| STM3687         | mtlR    | mannitol operon repressor                            | -1.27                                                                              | 0.13520 | -0.61                                                                               | 0.11045 | 2.09                                                                                | 0.00151 |
| STM3688         | STM3688 | putative cytoplasmic protein                         | -0.92                                                                              | 0.10994 | 0.50                                                                                | 0.14568 | 3.10                                                                                | 0.00015 |
| STM3688         | STM3688 | putative cytoplasmic protein                         | 0.42                                                                               | 0.48054 | 0.25                                                                                | 0.45330 | 2.91                                                                                | 0.00013 |
| STM3689         | yibL    | putative cytoplasmic protein                         | -0.75                                                                              | 0.26894 | -1.37                                                                               | 0.00520 | -0.52                                                                               | 0.39419 |
| STM3689         | yibL    | putative cytoplasmic protein                         | 0.03                                                                               | 0.95954 | -1.39                                                                               | 0.00142 | 0.08                                                                                | 0.86211 |
| STM3690         | STM3690 | putative inner membrane lipoprotein                  | 0.67                                                                               | 0.28285 | 0.54                                                                                | 0.48256 | 2.10                                                                                | 0.00575 |
| STM3690         | STM3690 | putative inner membrane lipoprotein                  | 2.48                                                                               | 0.01046 | 0.00                                                                                | 0.99628 | 1.53                                                                                | 0.00944 |
| STM3691         | STM3691 | putative inner membrane protein                      | 0.87                                                                               | 0.27828 | -0.07                                                                               | 0.87640 | -0.23                                                                               | 0.77868 |
| STM3691         | STM3691 | putative inner membrane protein                      | 0.71                                                                               | 0.36177 | -0.59                                                                               | 0.09009 | 0.01                                                                                | 0.99083 |
| STM3692         | lldP    | transporter LctP                                     | -0.69                                                                              | 0.15552 | -0.97                                                                               | 0.01811 | -0.36                                                                               | 0.55203 |
| STM3692         | lldP    | transporter LctP                                     | -1.16                                                                              | 0.12316 | -0.89                                                                               | 0.01612 | -1.76                                                                               | 0.15597 |
| STM3693         | lldR    | putative transcriptional regulator                   | 1.03                                                                               | 0.11705 | -0.99                                                                               | 0.02146 | -0.49                                                                               | 0.44620 |
| STM3693         | lldR    | putative transcriptional regulator                   | 1.66                                                                               | 0.01761 | -1.23                                                                               | 0.02012 | 0.16                                                                                | 0.74216 |
| STM3694         | lldD    | L-lactate dehydrogenase                              | -0.70                                                                              | 0.36089 | -0.42                                                                               | 0.55181 | 0.43                                                                                | 0.30914 |
| STM3694         | lldD    | L-lactate dehydrogenase                              | -0.43                                                                              | 0.63321 | -1.03                                                                               | 0.24832 | 0.07                                                                                | 0.91584 |
| STM3695         | yibK    | putative tRNA/rRNA methyltransferase                 | -0.75                                                                              | 0.19304 | -0.80                                                                               | 0.11469 | -1.97                                                                               | 0.00236 |
| STM3695         | yibK    | putative tRNA/rRNA methyltransferase                 | 0.51                                                                               | 0.50087 | -0.77                                                                               | 0.02363 | -0.47                                                                               | 0.21289 |
| STM3696         | STM3696 | putative transcriptional regulator                   | -0.34                                                                              | 0.50555 | 0.15                                                                                | 0.82139 | -0.89                                                                               | 0.04636 |
| STM3696         | STM3696 | putative transcriptional regulator                   | -0.50                                                                              | 0.24590 | -0.07                                                                               | 0.86051 | -0.16                                                                               | 0.81045 |
| STM3697         | STM3697 | putative mandelate racemase                          | -1.37                                                                              | 0.05886 | 0.38                                                                                | 0.51543 | -0.97                                                                               | 0.07254 |
| STM3697         | STM3697 | putative mandelate racemase                          | 0.03                                                                               | 0.95678 | 0.01                                                                                | 0.98570 | -0.71                                                                               | 0.18787 |
| STM3698         | STM3698 | putative permease                                    | -1.21                                                                              | 0.13573 | -0.44                                                                               | 0.15802 | -1.01                                                                               | 0.03548 |
| STM3698         | STM3698 | putative permease                                    | -0.25                                                                              | 0.54206 | -0.31                                                                               | 0.28715 | -1.40                                                                               | 0.00391 |
| STM3699         | cysE    | serine acetyltransferase                             | -0.52                                                                              | 0.28151 | 0.23                                                                                | 0.59682 | -1.78                                                                               | 0.00526 |
| STM3699         | cysE    | serine acetyltransferase                             | -0.07                                                                              | 0.87793 | 0.59                                                                                | 0.08758 | -1.16                                                                               | 0.02842 |
| STM3700         | gpsA    | NAD(P)H-dependent glycerol-3-phosphate dehydrogenase | -1.37                                                                              | 0.02592 | -0.36                                                                               | 0.28483 | -1.87                                                                               | 0.00419 |
| STM3700         | gpsA    | NAD(P)H-dependent glycerol-3-phosphate dehydrogenase | -1.37                                                                              | 0.08765 | -0.18                                                                               | 0.55502 | -1.88                                                                               | 0.00977 |
| STM3701         | secB    | export protein SecB                                  | -1.26                                                                              | 0.16694 | -0.70                                                                               | 0.03291 | -1.79                                                                               | 0.00100 |
| STM3701         | secB    | export protein SecB                                  | -1.19                                                                              | 0.04297 | -0.15                                                                               | 0.68936 | -1.24                                                                               | 0.02064 |
| STM3702         | grxC    | glutaredoxin 3                                       | -2.60                                                                              | 0.00567 | -1.10                                                                               | 0.02225 | -3.45                                                                               | 0.00030 |
| STM3702         | grxC    | glutaredoxin 3                                       | -2.17                                                                              | 0.00969 | -1.13                                                                               | 0.00418 | -3.24                                                                               | 0.00035 |
| STM3703         | yibN    | putative rhodanese-like sulfurtransferase            | -3.55                                                                              | 0.00547 | -1.44                                                                               | 0.00421 | -3.53                                                                               | 0.00010 |
| STM3703         | yibN    | putative rhodanese-like sulfurtransferase            | -1.91                                                                              | 0.01317 | -1.01                                                                               | 0.00813 | -2.83                                                                               | 0.00018 |
| STM3704         | pmgI    | phosphoglyceromutase                                 | -0.13                                                                              | 0.79153 | -1.51                                                                               | 0.00297 | -1.15                                                                               | 0.03017 |
| STM3704         | pmgI    | phosphoglyceromutase                                 | -0.62                                                                              | 0.27013 | -1.59                                                                               | 0.00170 | -1.36                                                                               | 0.01793 |
| STM3705         | yibP    | hypothetical protein STM3705                         | -2.12                                                                              | 0.00908 | -2.00                                                                               | 0.00041 | -1.89                                                                               | 0.00852 |
| STM3705         | yibP    | hypothetical protein STM3705                         | -3.36                                                                              | 0.01926 | -1.79                                                                               | 0.00043 | -3.06                                                                               | 0.01722 |
| STM3706         | yigQ    | putative periplasmic protein                         | 0.62                                                                               | 0.36453 | -1.11                                                                               | 0.00517 | -0.82                                                                               | 0.20163 |
| STM3706         | yigQ    | putative periplasmic protein                         | 1.18                                                                               | 0.49254 | -1.20                                                                               | 0.00300 | -0.18                                                                               | 0.62268 |
| STM3707         | yibD    | putative glycosyltransferase                         | -1.26                                                                              | 0.04836 | -1.62                                                                               | 0.00876 | -1.16                                                                               | 0.09393 |
| STM3707         | yibD    | putative glycosyltransferase                         | -1.43                                                                              | 0.06091 | -1.43                                                                               | 0.01644 | -1.68                                                                               | 0.00273 |
| STM3708         | tdh     | L-threonine 3-dehydrogenase                          | -0.88                                                                              | 0.16077 | -0.72                                                                               | 0.05504 | -1.30                                                                               | 0.01780 |
| STM3708         | tdh     | L-threonine 3-dehydrogenase                          | -0.09                                                                              | 0.90608 | -0.22                                                                               | 0.44568 | -0.46                                                                               | 0.34478 |
| STM3709         | kbl     | 2-amino-3-ketobutyrate coenzyme A ligase             | -3.08                                                                              | 0.00541 | -1.71                                                                               | 0.00074 | -2.89                                                                               | 0.00011 |
| STM3709         | kbl     | 2-amino-3-ketobutyrate coenzyme A ligase             | -2.32                                                                              | 0.01061 | -1.48                                                                               | 0.00257 | -2.86                                                                               | 0.00020 |
| STM3710         | rfaD    | ADP-L-glycero-D-mannoheptose-6-epimerase             | 0.88                                                                               | 0.50971 | 1.16                                                                                | 0.04910 | 4.02                                                                                | 0.00007 |
| STM3710         | rfaD    | ADP-L-glycero-D-mannoheptose-6-epimerase             | 0.49                                                                               | 0.65614 | 1.55                                                                                | 0.00432 | 2.96                                                                                | 0.00025 |
| STM3711         | rfaF    | ADP-heptose-LPS heptosyltransferase 1                | -3.26                                                                              | 0.00546 | -1.60                                                                               | 0.00188 | -1.59                                                                               | 0.00257 |
| STM3711         | rfaF    | ADP-heptose-LPS heptosyltransferase 1                | -2.84                                                                              | 0.01081 | -1.71                                                                               | 0.00110 | -1.93                                                                               | 0.00145 |
| STM3712         | rfaC    | heptosyl transferase I                               | -1.52                                                                              | 0.02646 | -1.36                                                                               | 0.01178 | -1.60                                                                               | 0.02536 |
| STM3712         | rfaC    | heptosyl transferase I                               | -2.95                                                                              | 0.00660 | -1.72                                                                               | 0.00088 | -2.02                                                                               | 0.00115 |
| STM3713         | rfaL    | O-antigen ligase                                     | -1.87                                                                              | 0.02026 | -1.92                                                                               | 0.00045 | -2.99                                                                               | 0.00139 |
| STM3713         | rfaL    | O-antigen ligase                                     | -2.60                                                                              | 0.01636 | -2.13                                                                               | 0.00041 | -2.30                                                                               | 0.02390 |
| STM3714         | rfaK    | putative hexose transferase                          | -0.88                                                                              | 0.06399 | -0.56                                                                               | 0.13730 | 0.15                                                                                | 0.77058 |
| STM3714         | rfaK    | putative hexose transferase                          | -0.57                                                                              | 0.19236 | -0.22                                                                               | 0.54056 | -0.28                                                                               | 0.42192 |
| STM3715         | rfaZ    | lipopolysaccharide core biosynthetic protein         | -0.09                                                                              | 0.95056 | 1.22                                                                                | 0.00469 | 2.62                                                                                | 0.00025 |
| STM3715         | rfaZ    | lipopolysaccharide core biosynthetic protein         | 1.82                                                                               | 0.52914 | 0.19                                                                                | 0.76828 | 3.16                                                                                | 0.00012 |
| STM3716         | rfaY    | lipopolysaccharide core biosynthetic protein         | -2.06                                                                              | 0.00922 | -1.82                                                                               | 0.00057 | -2.24                                                                               | 0.00729 |
| STM3716         | rfaY    | lipopolysaccharide core biosynthetic protein         | -1.75                                                                              | 0.03523 | -2.31                                                                               | 0.00027 | -3.14                                                                               | 0.00510 |
| STM3717         | rfaJ    | lipopolysaccharide glucosyltransferase               | -2.22                                                                              | 0.00735 | -1.93                                                                               | 0.00047 | -2.59                                                                               | 0.00116 |
| STM3717         | rfaJ    | lipopolysaccharide glucosyltransferase               | -1.25                                                                              | 0.25989 | -2.48                                                                               | 0.00007 | -2.03                                                                               | 0.00226 |
| STM3718         | rfaI    | lipopolysaccharide-alpha-1,3-D-galactosyltransferase | -2.92                                                                              | 0.00979 | -2.84                                                                               | 0.00006 | -2.68                                                                               | 0.00079 |
| STM3718         | rfaI    | lipopolysaccharide-alpha-1,3-D-galactosyltransferase | -3.39                                                                              | 0.01007 | -2.64                                                                               | 0.00042 | -2.68                                                                               | 0.00141 |
| STM3719         | rfaB    | lipopolysaccharide-1,6-D-galactosyltransferase       | -3.02                                                                              | 0.01491 | -2.54                                                                               | 0.00058 | -3.15                                                                               | 0.00062 |
| STM3719         | rfaB    | lipopolysaccharide-1,6-D-galactosyltransferase       | -1.39                                                                              | 0.07341 | -2.20                                                                               | 0.00015 | -1.61                                                                               | 0.00721 |

**Table S2.** Genome-wide expression of *Salmonella enterica* serovar Typhimurium inside fibroblasts

|                 |         |                                                          | Intracellular WT<br>24 h p.i.                                                      |         | Intracellular <i>phoP</i><br>24 h p.i.                                              |         | Extracellular WT<br>stationary phase                                                |         |
|-----------------|---------|----------------------------------------------------------|------------------------------------------------------------------------------------|---------|-------------------------------------------------------------------------------------|---------|-------------------------------------------------------------------------------------|---------|
|                 |         |                                                          | Relative to WT<br>exponential LB                                                   |         | Relative to <i>phoP</i><br>exponential LB                                           |         | Relative to WT<br>exponential LB                                                    |         |
|                 |         |                                                          |  |         |  |         |  |         |
| Systematic name | Gene    | Product                                                  | log2Ratio (M)                                                                      | p value | log2Ratio (M)                                                                       | p value | log2Ratio (M)                                                                       | p value |
| STM3720         | yibR    | putative inner membrane protein                          | 0.82                                                                               | 0.09758 | 0.17                                                                                | 0.54338 | 2.37                                                                                | 0.00084 |
| STM3720         | yibR    | putative inner membrane protein                          | 0.69                                                                               | 0.20931 | 0.12                                                                                | 0.78223 | 2.99                                                                                | 0.00010 |
| STM3721         | rfaP    | lipopolysaccharide core biosynthetic protein             | -0.76                                                                              | 0.28479 | -0.73                                                                               | 0.06667 | 0.15                                                                                | 0.84396 |
| STM3721         | rfaP    | lipopolysaccharide core biosynthetic protein             | -0.61                                                                              | 0.37797 | -1.23                                                                               | 0.00663 | 0.08                                                                                | 0.95861 |
| STM3722         | rfaG    | glucosyltransferase I                                    | -1.93                                                                              | 0.01918 | -1.46                                                                               | 0.00262 | -2.64                                                                               | 0.00038 |
| STM3722         | rfaG    | glucosyltransferase I                                    | -0.44                                                                              | 0.32838 | -1.29                                                                               | 0.00581 | -1.85                                                                               | 0.00149 |
| STM3723         | rfaQ    | lipopolysaccharide core biosynthetic protein             | -2.88                                                                              | 0.00547 | -1.77                                                                               | 0.00051 | -2.62                                                                               | 0.00115 |
| STM3723         | rfaQ    | lipopolysaccharide core biosynthetic protein             | -2.33                                                                              | 0.06948 | -1.72                                                                               | 0.00132 | -2.56                                                                               | 0.00245 |
| STM3724         | kdtA    | 3-deoxy-D-manno-octulosonic-acid transferase             | -2.24                                                                              | 0.01319 | -1.10                                                                               | 0.00609 | -3.39                                                                               | 0.00010 |
| STM3724         | kdtA    | 3-deoxy-D-manno-octulosonic-acid transferase             | -0.92                                                                              | 0.14255 | -1.03                                                                               | 0.01041 | -2.85                                                                               | 0.00101 |
| STM3725         | kdtB    | phosphopantetheine adenylyltransferase                   | -1.60                                                                              | 0.04475 | -0.81                                                                               | 0.01520 | -2.23                                                                               | 0.00287 |
| STM3725         | kdtB    | phosphopantetheine adenylyltransferase                   | -1.07                                                                              | 0.04268 | -0.83                                                                               | 0.02537 | -1.94                                                                               | 0.00942 |
| STM3726         | mutM    | formamidopyrimidine-DNA glycosylase                      | -1.87                                                                              | 0.01896 | -0.56                                                                               | 0.18357 | -2.86                                                                               | 0.00093 |
| STM3726         | mutM    | formamidopyrimidine-DNA glycosylase                      | -0.58                                                                              | 0.27024 | -0.77                                                                               | 0.05632 | -2.07                                                                               | 0.00238 |
| STM3727         | rpmG    | 50S ribosomal protein L33                                | -3.17                                                                              | 0.00547 | -1.98                                                                               | 0.00185 | -3.25                                                                               | 0.00011 |
| STM3727         | rpmG    | 50S ribosomal protein L33                                | -2.25                                                                              | 0.00841 | -1.79                                                                               | 0.00571 | -2.73                                                                               | 0.00028 |
| STM3728         | rpmB    | 50S ribosomal protein L28                                | -4.10                                                                              | 0.00900 | -3.01                                                                               | 0.00055 | -5.24                                                                               | 0.00004 |
| STM3728         | rpmB    | 50S ribosomal protein L28                                | -3.39                                                                              | 0.00541 | -2.20                                                                               | 0.00102 | -4.37                                                                               | 0.00003 |
| STM3729         | radC    | DNA repair protein RadC                                  | -3.19                                                                              | 0.00541 | -2.00                                                                               | 0.00061 | -1.92                                                                               | 0.00415 |
| STM3729         | radC    | DNA repair protein RadC                                  | -1.65                                                                              | 0.02592 | -2.13                                                                               | 0.00047 | -2.13                                                                               | 0.00038 |
| STM3730         | dfp     | phosphopantothenoylcysteine synthase/decarboxylase       | -1.61                                                                              | 0.01402 | -0.03                                                                               | 0.93669 | -2.46                                                                               | 0.00093 |
| STM3730         | dfp     | phosphopantothenoylcysteine synthase/decarboxylase       | -0.25                                                                              | 0.71986 | -0.60                                                                               | 0.09317 | -2.23                                                                               | 0.00228 |
| STM3731         | dut     | deoxyuridine 5'-triphosphate nucleotidohydrolase         | -0.53                                                                              | 0.21107 | -1.31                                                                               | 0.00452 | -1.74                                                                               | 0.03236 |
| STM3731         | dut     | deoxyuridine 5'-triphosphate nucleotidohydrolase         | 0.03                                                                               | 0.95840 | -1.43                                                                               | 0.00842 | -1.60                                                                               | 0.02418 |
| STM3732         | slmA    | nucleoid occlusion protein                               | -0.42                                                                              | 0.47264 | -0.60                                                                               | 0.45514 | -1.12                                                                               | 0.04483 |
| STM3732         | slmA    | nucleoid occlusion protein                               | -1.33                                                                              | 0.02680 | -1.41                                                                               | 0.00423 | -1.00                                                                               | 0.07951 |
| STM3733         | pyrE    | orotate phosphoribosyltransferase                        | -1.01                                                                              | 0.06558 | -0.87                                                                               | 0.01533 | -0.36                                                                               | 0.51047 |
| STM3733         | pyrE    | orotate phosphoribosyltransferase                        | -0.13                                                                              | 0.79062 | -0.56                                                                               | 0.22755 | -0.47                                                                               | 0.33808 |
| STM3734         | rph     | ribonuclease PH                                          | 0.35                                                                               | 0.45374 | -1.01                                                                               | 0.02340 | -1.44                                                                               | 0.05229 |
| STM3734         | rph     | ribonuclease PH                                          | 1.04                                                                               | 0.20818 | -0.82                                                                               | 0.02466 | -1.04                                                                               | 0.09931 |
| STM3735         | yicC    | putative stress-induced protein                          | -1.96                                                                              | 0.01405 | -0.71                                                                               | 0.13103 | -1.11                                                                               | 0.01387 |
| STM3735         | yicC    | putative stress-induced protein                          | 0.62                                                                               | 0.17439 | 0.04                                                                                | 0.95712 | 1.84                                                                                | 0.04130 |
| STM3736         | STM3736 | putative transcriptional regulator                       | -1.40                                                                              | 0.04964 | -0.65                                                                               | 0.09709 | -1.41                                                                               | 0.00335 |
| STM3736         | STM3736 | putative transcriptional regulator                       | -0.92                                                                              | 0.06409 | -1.10                                                                               | 0.01929 | -0.57                                                                               | 0.10354 |
| STM3737         | STM3737 | putative Zn-dependent hydrolase                          | -0.69                                                                              | 0.15901 | -0.32                                                                               | 0.42852 | -1.43                                                                               | 0.01082 |
| STM3737         | STM3737 | putative Zn-dependent hydrolase                          | 0.68                                                                               | 0.14878 | -0.50                                                                               | 0.27176 | -0.47                                                                               | 0.24037 |
| STM3738         | yigC    | putative inner membrane protein                          | -0.60                                                                              | 0.58966 | -1.02                                                                               | 0.00630 | -1.10                                                                               | 0.07277 |
| STM3738         | yigC    | putative inner membrane protein                          | -2.10                                                                              | 0.06415 | -2.43                                                                               | 0.00069 | -2.47                                                                               | 0.01667 |
| STM3739         | yicF    | DNA ligase                                               | -1.24                                                                              | 0.08779 | -0.36                                                                               | 0.34452 | -1.22                                                                               | 0.02593 |
| STM3739         | yicF    | DNA ligase                                               | -1.21                                                                              | 0.28305 | -0.61                                                                               | 0.04289 | -1.00                                                                               | 0.16676 |
| STM3740         | gmk     | guanylate kinase                                         | -1.65                                                                              | 0.01262 | -0.74                                                                               | 0.06206 | -1.34                                                                               | 0.00400 |
| STM3740         | gmk     | guanylate kinase                                         | -1.85                                                                              | 0.08055 | -0.83                                                                               | 0.01292 | -1.16                                                                               | 0.01254 |
| STM3741         | rpoZ    | DNA-directed RNA polymerase omega subunit                | -2.97                                                                              | 0.00547 | -0.85                                                                               | 0.01870 | -2.79                                                                               | 0.00016 |
| STM3741         | rpoZ    | DNA-directed RNA polymerase omega subunit                | -1.12                                                                              | 0.04181 | -0.73                                                                               | 0.02760 | -2.16                                                                               | 0.00045 |
| STM3742         | spoT    | (p)ppGpp synthetase II/guanosine-3',5'-bis pyrophosphate | -3.18                                                                              | 0.00547 | -2.46                                                                               | 0.00013 | -2.03                                                                               | 0.02860 |
| STM3742         | spoT    | (p)ppGpp synthetase II/guanosine-3',5'-bis pyrophosphate | -3.10                                                                              | 0.01945 | -2.77                                                                               | 0.00005 | -3.51                                                                               | 0.00442 |
| STM3743         | spoU    | putative tRNA/rRNA methyltransferase                     | -1.23                                                                              | 0.07835 | -2.59                                                                               | 0.00014 | -3.36                                                                               | 0.00073 |
| STM3743         | spoU    | putative tRNA/rRNA methyltransferase                     | -1.82                                                                              | 0.04683 | -1.97                                                                               | 0.00061 | -3.68                                                                               | 0.00010 |
| STM3744         | recG    | DNA helicase                                             | -0.95                                                                              | 0.13497 | -0.47                                                                               | 0.45197 | -0.16                                                                               | 0.80952 |
| STM3744         | recG    | DNA helicase                                             | 0.65                                                                               | 0.24810 | -0.46                                                                               | 0.11498 | -1.01                                                                               | 0.07923 |
| STM3745         | STM3745 | putative cytoplasmic protein                             | -0.40                                                                              | 0.44035 | -0.30                                                                               | 0.34920 | -2.82                                                                               | 0.00046 |
| STM3745         | STM3745 | putative cytoplasmic protein                             | 0.58                                                                               | 0.30531 | -0.29                                                                               | 0.58208 | -1.06                                                                               | 0.05149 |
| STM3746         | gltS    | glutamate transport protein                              | -1.70                                                                              | 0.01834 | -0.42                                                                               | 0.34014 | -1.47                                                                               | 0.01651 |
| STM3746         | gltS    | glutamate transport protein                              | -0.38                                                                              | 0.47324 | -0.10                                                                               | 0.80656 | -1.77                                                                               | 0.00400 |
| STM3747         | yicE    | putative purine/xanthine transport protein               | 0.19                                                                               | 0.68951 | 0.34                                                                                | 0.33319 | -1.54                                                                               | 0.01141 |
| STM3747         | yicE    | putative purine/xanthine transport protein               | 0.84                                                                               | 0.11138 | 0.10                                                                                | 0.73903 | -0.49                                                                               | 0.34255 |
| STM3748         | yicH    | putative inner membrane protein                          | 0.59                                                                               | 0.16839 | -0.16                                                                               | 0.65571 | -1.25                                                                               | 0.01147 |
| STM3748         | yicH    | putative inner membrane protein                          | 2.44                                                                               | 0.01259 | -0.29                                                                               | 0.31693 | 0.52                                                                                | 0.24471 |
| STM3749         | yicI    | putative alpha xylosidase                                | -0.48                                                                              | 0.26642 | 0.21                                                                                | 0.50584 | -0.95                                                                               | 0.13034 |
| STM3749         | yicI    | putative alpha xylosidase                                | 0.74                                                                               | 0.16462 | -0.21                                                                               | 0.57107 | -0.32                                                                               | 0.50308 |
| STM3750         | yicJ    | putative transport protein                               | 0.15                                                                               | 0.86652 | 0.48                                                                                | 0.30981 | 1.42                                                                                | 0.07039 |
| STM3750         | yicJ    | putative transport protein                               | 1.05                                                                               | 0.09643 | 0.03                                                                                | 0.94280 | 1.50                                                                                | 0.00999 |
| STM3751         | selC    | STM3751                                                  | -0.63                                                                              | 0.38500 | 0.28                                                                                | 0.68933 | 1.22                                                                                | 0.05437 |
| STM3751         | selC    | STM3751                                                  | -0.80                                                                              | 0.50075 | 0.15                                                                                | 0.80391 | 0.43                                                                                | 0.41547 |
| STM3752         | STM3752 | putative cytoplasmic protein                             | -0.94                                                                              | 0.11013 | -0.48                                                                               | 0.21884 | -0.49                                                                               | 0.25088 |
| STM3752         | STM3752 | putative cytoplasmic protein                             | -0.18                                                                              | 0.75031 | -0.74                                                                               | 0.02726 | -0.20                                                                               | 0.75334 |
| STM3753         | sugR    | ATP binding protein                                      | -0.01                                                                              | 0.97702 | -0.07                                                                               | 0.83068 | -0.04                                                                               | 0.93346 |
| STM3753         | sugR    | ATP binding protein                                      | 0.23                                                                               | 0.61957 | -0.60                                                                               | 0.09251 | 1.16                                                                                | 0.25040 |
| STM3754         | STM3754 | putative cytoplasmic protein                             | -0.74                                                                              | 0.13062 | 0.06                                                                                | 0.85235 | 1.23                                                                                | 0.05453 |
| STM3754         | STM3754 | putative cytoplasmic protein                             | -1.14                                                                              | 0.05440 | -0.43                                                                               | 0.27368 | 0.29                                                                                | 0.42191 |

**Table S2.** Genome-wide expression of *Salmonella enterica* serovar Typhimurium inside fibroblasts

|                 |           |                                                       | Intracellular WT<br>24 h p.i.                                                      |         | Intracellular <i>phoP</i><br>24 h p.i.                                              |         | Extracellular WT<br>stationary phase                                                |         |
|-----------------|-----------|-------------------------------------------------------|------------------------------------------------------------------------------------|---------|-------------------------------------------------------------------------------------|---------|-------------------------------------------------------------------------------------|---------|
|                 |           |                                                       | Relative to WT<br>exponential LB                                                   |         | Relative to <i>phoP</i><br>exponential LB                                           |         | Relative to WT<br>exponential LB                                                    |         |
|                 |           |                                                       |  |         |  |         |  |         |
| Systematic name | Gene      | Product                                               | log2Ratio (M)                                                                      | p value | log2Ratio (M)                                                                       | p value | log2Ratio (M)                                                                       | p value |
| STM3755         | rhuM      | putative cytoplasmic protein                          | 0.23                                                                               | 0.71753 | 0.18                                                                                | 0.71413 | 0.19                                                                                | 0.73589 |
| STM3755         | rhuM      | putative cytoplasmic protein                          | 1.63                                                                               | 0.01638 | 0.39                                                                                | 0.21994 | 0.61                                                                                | 0.25473 |
| STM3756         | rmbA      | putative cytoplasmic protein                          | -0.59                                                                              | 0.22702 | -0.86                                                                               | 0.04479 | -0.43                                                                               | 0.47254 |
| STM3756         | rmbA      | putative cytoplasmic protein                          | 1.03                                                                               | 0.04270 | -1.38                                                                               | 0.00673 | 0.17                                                                                | 0.65412 |
| STM3757         | misL      | putative autotransporter                              | 1.40                                                                               | 0.21414 | -0.06                                                                               | 0.88634 | 1.14                                                                                | 0.24183 |
| STM3757         | misL      | putative autotransporter                              | 0.28                                                                               | 0.83883 | -0.43                                                                               | 0.13311 | -0.54                                                                               | 0.57822 |
| STM3758         | fidL      | putative inner membrane protein                       | -0.35                                                                              | 0.48762 | -0.46                                                                               | 0.12310 | -0.51                                                                               | 0.25896 |
| STM3758         | fidL      | putative inner membrane protein                       | 1.22                                                                               | 0.18946 | 0.68                                                                                | 0.53774 | 0.47                                                                                | 0.34698 |
| STM3759,S       | marT      | putative transcriptional regulator                    | -0.13                                                                              | 0.82925 | -0.25                                                                               | 0.55429 | 0.74                                                                                | 0.25749 |
| STM3759,S       | marT      | putative transcriptional regulator                    | 1.42                                                                               | 0.07231 | -0.16                                                                               | 0.77545 | 0.24                                                                                | 0.59886 |
| STM3761         | sisA      | putative inner membrane protein                       | 0.09                                                                               | 0.89905 | 1.80                                                                                | 0.00122 | -0.32                                                                               | 0.45592 |
| STM3761         | sisA      | putative inner membrane protein                       | 1.77                                                                               | 0.01376 | 2.00                                                                                | 0.00079 | 0.94                                                                                | 0.02636 |
| STM3762         | cigR      | putative inner membrane protein                       | -0.48                                                                              | 0.63662 | 1.12                                                                                | 0.00469 | -0.51                                                                               | 0.55305 |
| STM3762         | cigR      | putative inner membrane protein                       | 1.49                                                                               | 0.02758 | 2.05                                                                                | 0.00091 | 0.09                                                                                | 0.81388 |
| STM3763         | mgtB      | Mg2+ transporter                                      | 1.77                                                                               | 0.03109 | -1.02                                                                               | 0.05850 | -1.39                                                                               | 0.08794 |
| STM3763         | mgtB      | Mg2+ transporter                                      | 2.49                                                                               | 0.01330 | -0.34                                                                               | 0.53462 | 0.63                                                                                | 0.30355 |
| STM3764         | mgtC      | Mg2+ transport protein                                | 4.25                                                                               | 0.00541 | 0.33                                                                                | 0.35977 | -0.67                                                                               | 0.24396 |
| STM3764         | mgtC      | Mg2+ transport protein                                | 5.18                                                                               | 0.00512 | -0.27                                                                               | 0.35387 | 0.68                                                                                | 0.28243 |
| STM3765         | yicL      | putative permease                                     | -0.84                                                                              | 0.23926 | 0.05                                                                                | 0.88268 | -0.15                                                                               | 0.83030 |
| STM3765         | yicL      | putative permease                                     | -0.23                                                                              | 0.72233 | -0.39                                                                               | 0.25062 | -0.38                                                                               | 0.60729 |
| STM3766         | STM3766   | putative cytoplasmic protein                          | 0.93                                                                               | 0.26007 | 0.90                                                                                | 0.01305 | 0.66                                                                                | 0.12786 |
| STM3766         | STM3766   | putative cytoplasmic protein                          | 1.38                                                                               | 0.11644 | 0.39                                                                                | 0.29907 | 0.49                                                                                | 0.30355 |
| STM3767         | STM3767   | putative cytoplasmic protein                          | 1.08                                                                               | 0.09412 | 0.68                                                                                | 0.09170 | 0.12                                                                                | 0.79125 |
| STM3767         | STM3767   | putative cytoplasmic protein                          | 1.51                                                                               | 0.01731 | 0.18                                                                                | 0.60282 | 1.02                                                                                | 0.05994 |
| STM3768         | STM3768   | putative selenocysteine synthase                      | 0.08                                                                               | 0.87052 | -0.27                                                                               | 0.51347 | -0.51                                                                               | 0.41237 |
| STM3768         | STM3768   | putative selenocysteine synthase                      | 1.07                                                                               | 0.10226 | -1.62                                                                               | 0.00836 | 0.11                                                                                | 0.81425 |
| STM3769,S       | STM3769,S | putative phosphotransferase system enzyme II          | -0.14                                                                              | 0.77029 | -0.21                                                                               | 0.48523 | 0.78                                                                                | 0.12494 |
| STM3769,S       | STM3769,S | putative phosphotransferase system enzyme II          | 0.95                                                                               | 0.13828 | -0.61                                                                               | 0.05305 | 0.23                                                                                | 0.73110 |
| STM3770         | STM3770   | putative phosphotransferase system enzyme IIC         | -0.48                                                                              | 0.31009 | -0.31                                                                               | 0.52126 | -1.02                                                                               | 0.16242 |
| STM3770         | STM3770   | putative phosphotransferase system enzyme IIC         | 2.63                                                                               | 0.01067 | 0.25                                                                                | 0.67904 | 2.40                                                                                | 0.01124 |
| STM3771         | STM3771   | putative phosphotransferase system enzyme IIB         | -0.33                                                                              | 0.59332 | -0.49                                                                               | 0.22412 | -0.94                                                                               | 0.13456 |
| STM3771         | STM3771   | putative phosphotransferase system enzyme IIB         | 0.65                                                                               | 0.23607 | -0.77                                                                               | 0.05844 | -0.04                                                                               | 0.93149 |
| STM3772         | STM3772   | putative phosphotransferase system enzyme IIA         | 0.65                                                                               | 0.23038 | -0.30                                                                               | 0.44649 | -0.05                                                                               | 0.94651 |
| STM3772         | STM3772   | putative phosphotransferase system enzyme IIA         | 0.61                                                                               | 0.22959 | -0.40                                                                               | 0.36314 | 1.36                                                                                | 0.08054 |
| STM3773         | STM3773   | putative transcriptional regulator                    | 0.26                                                                               | 0.61745 | -1.11                                                                               | 0.02122 | -0.80                                                                               | 0.19111 |
| STM3773         | STM3773   | putative transcriptional regulator                    | -0.02                                                                              | 0.97323 | -0.99                                                                               | 0.13403 | 0.87                                                                                | 0.23871 |
| STM3774         | STM3774   | putative inner membrane protein                       | 4.30                                                                               | 0.01844 | 0.07                                                                                | 0.88824 | 2.40                                                                                | 0.04983 |
| STM3774         | STM3774   | putative inner membrane protein                       | 3.75                                                                               | 0.09229 | -1.37                                                                               | 0.00239 | 3.10                                                                                | 0.03017 |
| STM3775         | STM3775   | putative glycosyl hydrolase                           | 0.21                                                                               | 0.72704 | -0.67                                                                               | 0.05767 | -0.34                                                                               | 0.68420 |
| STM3775         | STM3775   | putative glycosyl hydrolase                           | 0.45                                                                               | 0.53505 | -1.05                                                                               | 0.02957 | -0.21                                                                               | 0.74539 |
| STM3776         | yicM      | putative transport protein                            | -1.27                                                                              | 0.08333 | -0.16                                                                               | 0.67323 | -0.45                                                                               | 0.50852 |
| STM3776         | yicM      | putative transport protein                            | 1.52                                                                               | 0.13027 | 0.11                                                                                | 0.83199 | 1.11                                                                                | 0.00975 |
| STM3777         | STM3777   | putative cytoplasmic protein                          | 0.65                                                                               | 0.18164 | 2.09                                                                                | 0.00021 | 1.63                                                                                | 0.00186 |
| STM3777         | STM3777   | putative cytoplasmic protein                          | 2.01                                                                               | 0.00935 | 1.76                                                                                | 0.00072 | 2.73                                                                                | 0.00022 |
| STM3778         | STM3778   | putative DNA-binding protein                          | 0.72                                                                               | 0.29713 | 1.52                                                                                | 0.00562 | 1.21                                                                                | 0.02811 |
| STM3778         | STM3778   | putative DNA-binding protein                          | 1.85                                                                               | 0.09620 | 1.53                                                                                | 0.00591 | 1.70                                                                                | 0.01478 |
| STM3779         | STM3779   | putative phosphotransferase system HPr protein        | 0.18                                                                               | 0.68656 | 0.88                                                                                | 0.10811 | 2.21                                                                                | 0.04987 |
| STM3779         | STM3779   | putative phosphotransferase system HPr protein        | 0.13                                                                               | 0.80753 | 0.50                                                                                | 0.31174 | 1.42                                                                                | 0.00705 |
| STM3780         | STM3780   | hypothetical protein STM3780                          | 0.14                                                                               | 0.83105 | 0.16                                                                                | 0.60282 | -0.59                                                                               | 0.11989 |
| STM3780         | STM3780   | hypothetical protein STM3780                          | 1.56                                                                               | 0.02423 | 0.06                                                                                | 0.87913 | 1.43                                                                                | 0.06087 |
| STM3781         | STM3781   | putative sugar kinase                                 | -0.33                                                                              | 0.48168 | 1.15                                                                                | 0.03409 | -1.40                                                                               | 0.01622 |
| STM3781         | STM3781   | putative sugar kinase                                 | 1.97                                                                               | 0.05095 | -0.08                                                                               | 0.80429 | 1.60                                                                                | 0.00594 |
| STM3782         | STM3782   | putative PTS system galactitol-specific enzyme IIC    | 0.24                                                                               | 0.56913 | 0.29                                                                                | 0.67599 | 0.10                                                                                | 0.89746 |
| STM3782         | STM3782   | putative PTS system galactitol-specific enzyme IIC    | -0.82                                                                              | 0.24390 | -0.03                                                                               | 0.96010 | -1.07                                                                               | 0.07095 |
| STM3783         | STM3783   | putative periplasmic protein                          | 0.71                                                                               | 0.60249 | 1.51                                                                                | 0.00526 | 0.61                                                                                | 0.09991 |
| STM3783         | STM3783   | putative periplasmic protein                          | -0.85                                                                              | 0.19627 | 0.94                                                                                | 0.01100 | 0.56                                                                                | 0.21853 |
| STM3784         | STM3784   | putative phosphotransferase system mannitol/fructose- | -0.41                                                                              | 0.36342 | 0.37                                                                                | 0.19345 | 0.06                                                                                | 0.90469 |
| STM3784         | STM3784   | putative phosphotransferase system mannitol/fructose- | -1.22                                                                              | 0.07862 | 0.60                                                                                | 0.11555 | 0.18                                                                                | 0.76228 |
| STM3785         | STM3785   | putative regulatory protein                           | -0.06                                                                              | 0.89515 | 0.98                                                                                | 0.05621 | -0.73                                                                               | 0.09239 |
| STM3785         | STM3785   | putative regulatory protein                           | 3.11                                                                               | 0.01818 | 0.16                                                                                | 0.62607 | 0.54                                                                                | 0.30445 |
| STM3786         | yicN      | putative inner membrane protein                       | -0.90                                                                              | 0.12653 | -0.56                                                                               | 0.15867 | -1.45                                                                               | 0.00440 |
| STM3786         | yicN      | putative inner membrane protein                       | 1.02                                                                               | 0.06919 | -0.42                                                                               | 0.17240 | -0.82                                                                               | 0.04514 |
| STM3787         | uhpT      | hexose phosphate transport protein                    | 0.60                                                                               | 0.22345 | 0.70                                                                                | 0.22380 | 1.10                                                                                | 0.01447 |
| STM3787         | uhpT      | hexose phosphate transport protein                    | 1.94                                                                               | 0.01497 | 0.08                                                                                | 0.92377 | 0.29                                                                                | 0.81708 |
| STM3788         | uhpC      | regulatory protein                                    | -0.25                                                                              | 0.67870 | -1.45                                                                               | 0.00585 | -1.61                                                                               | 0.00413 |
| STM3788         | uhpC      | regulatory protein                                    | 0.59                                                                               | 0.52554 | -1.45                                                                               | 0.00536 | -0.77                                                                               | 0.24881 |
| STM3789         | uhpB      | sensory histidine kinase                              | 0.36                                                                               | 0.77049 | -1.41                                                                               | 0.00612 | 0.66                                                                                | 0.07979 |
| STM3789         | uhpB      | sensory histidine kinase                              | 0.29                                                                               | 0.71508 | -1.50                                                                               | 0.02348 | -0.05                                                                               | 0.91117 |
| STM3790         | uhpA      | response regulator                                    | -2.04                                                                              | 0.01402 | 0.05                                                                                | 0.94058 | -1.71                                                                               | 0.04076 |
| STM3790         | uhpA      | response regulator                                    | -1.03                                                                              | 0.19350 | -1.02                                                                               | 0.01096 | -1.73                                                                               | 0.02221 |

**Table S2.** Genome-wide expression of *Salmonella enterica* serovar Typhimurium inside fibroblasts

|                 |            |                                                            | Intracellular WT<br>24 h p.i.                                                      |         | Intracellular <i>phoP</i><br>24 h p.i.                                              |         | Extracellular WT<br>stationary phase                                                |         |
|-----------------|------------|------------------------------------------------------------|------------------------------------------------------------------------------------|---------|-------------------------------------------------------------------------------------|---------|-------------------------------------------------------------------------------------|---------|
|                 |            |                                                            | Relative to WT<br>exponential LB                                                   |         | Relative to <i>phoP</i><br>exponential LB                                           |         | Relative to WT<br>exponential LB                                                    |         |
|                 |            |                                                            |  |         |  |         |  |         |
| Systematic name | Gene       | Product                                                    | log2Ratio (M)                                                                      | p value | log2Ratio (M)                                                                       | p value | log2Ratio (M)                                                                       | p value |
| STM3791         | STM3791    | putative cytoplasmic protein                               | -0.33                                                                              | 0.63069 | -0.95                                                                               | 0.00961 | -0.35                                                                               | 0.49423 |
| STM3791         | STM3791    | putative cytoplasmic protein                               | 0.97                                                                               | 0.20670 | -1.05                                                                               | 0.03548 | 0.79                                                                                | 0.18203 |
| STM3792         | STM3792    | putative L-fucose permease                                 | -0.84                                                                              | 0.22279 | -0.68                                                                               | 0.07449 | 0.25                                                                                | 0.75282 |
| STM3792         | STM3792    | putative L-fucose permease                                 | 0.46                                                                               | 0.53467 | -0.51                                                                               | 0.11302 | -0.96                                                                               | 0.09847 |
| STM3793         | STM3793    | putative sugar kinase                                      | -0.91                                                                              | 0.13970 | 0.04                                                                                | 0.93196 | -0.70                                                                               | 0.16113 |
| STM3793         | STM3793    | putative sugar kinase                                      | -0.34                                                                              | 0.51992 | 0.69                                                                                | 0.14320 | 1.97                                                                                | 0.02257 |
| STM3794         | STM3794    | putative regulatory protein                                | -0.85                                                                              | 0.19429 | 0.49                                                                                | 0.16069 | 1.95                                                                                | 0.00672 |
| STM3794         | STM3794    | putative regulatory protein                                | 0.49                                                                               | 0.26513 | 0.82                                                                                | 0.02133 | 3.49                                                                                | 0.01089 |
| STM3795         | ilvN       | acetolactate synthase small subunit                        | -0.17                                                                              | 0.73579 | 0.22                                                                                | 0.44567 | -0.94                                                                               | 0.23691 |
| STM3795         | ilvN       | acetolactate synthase small subunit                        | 1.81                                                                               | 0.02331 | 0.40                                                                                | 0.26988 | 1.58                                                                                | 0.09568 |
| STM3796         | ilvB       | acetolactate synthase large subunit                        | 1.81                                                                               | 0.04734 | -0.05                                                                               | 0.88176 | 0.25                                                                                | 0.70681 |
| STM3796         | ilvB       | acetolactate synthase large subunit                        | 0.47                                                                               | 0.70958 | -0.55                                                                               | 0.27598 | 0.75                                                                                | 0.06311 |
| STM3796A,S      | STM3796A,S | integral membrane protein                                  | 1.62                                                                               | 0.06501 | -1.05                                                                               | 0.00626 | -0.26                                                                               | 0.57568 |
| STM3796A,S      | STM3796A,S | integral membrane protein                                  | 2.39                                                                               | 0.04338 | -1.50                                                                               | 0.00209 | 0.66                                                                                | 0.25108 |
| STM3797         | ivbL       | ilvB operon leader peptide                                 | 0.26                                                                               | 0.66916 | 0.82                                                                                | 0.04063 | 0.27                                                                                | 0.60247 |
| STM3797         | ivbL       | ilvB operon leader peptide                                 | 1.44                                                                               | 0.03158 | 1.00                                                                                | 0.01167 | 1.56                                                                                | 0.02970 |
| STM3798         | emrD       | multidrug transport protein                                | -1.21                                                                              | 0.11752 | -0.51                                                                               | 0.39845 | -1.14                                                                               | 0.13460 |
| STM3798         | emrD       | multidrug transport protein                                | -0.41                                                                              | 0.37359 | -0.21                                                                               | 0.47621 | -0.73                                                                               | 0.05969 |
| STM3799         | STM3799    | putative periplasmic protein                               | -0.18                                                                              | 0.80736 | -0.13                                                                               | 0.70027 | 0.18                                                                                | 0.80831 |
| STM3799         | STM3799    | putative periplasmic protein                               | 0.86                                                                               | 0.29573 | -0.26                                                                               | 0.37985 | -0.11                                                                               | 0.83998 |
| STM3800         | dsdC       | transcriptional activator                                  | -1.43                                                                              | 0.02009 | -1.70                                                                               | 0.09962 | -1.52                                                                               | 0.12434 |
| STM3800         | dsdC       | transcriptional activator                                  | -0.76                                                                              | 0.17650 | -1.15                                                                               | 0.01544 | -1.18                                                                               | 0.17055 |
| STM3801         | dsdX       | putative transport protein                                 | 0.13                                                                               | 0.76750 | -0.65                                                                               | 0.03986 | -0.81                                                                               | 0.03319 |
| STM3801         | dsdX       | putative transport protein                                 | 1.21                                                                               | 0.05758 | -0.95                                                                               | 0.01174 | 0.45                                                                                | 0.20090 |
| STM3802         | dsdA       | D-serine dehydratase                                       | 1.24                                                                               | 0.16210 | -0.30                                                                               | 0.34904 | -0.24                                                                               | 0.62494 |
| STM3802         | dsdA       | D-serine dehydratase                                       | 0.34                                                                               | 0.49299 | -1.16                                                                               | 0.01401 | 0.58                                                                                | 0.18861 |
| STM3803         | yidF       | putative cytoplasmic protein                               | 0.24                                                                               | 0.60093 | -0.59                                                                               | 0.08498 | -1.83                                                                               | 0.02162 |
| STM3803         | yidF       | putative cytoplasmic protein                               | 0.92                                                                               | 0.20818 | -0.71                                                                               | 0.24274 | -0.32                                                                               | 0.54879 |
| STM3804         | yidG       | putative inner membrane protein                            | -1.03                                                                              | 0.23413 | -0.31                                                                               | 0.47676 | -0.35                                                                               | 0.40236 |
| STM3804         | yidG       | putative inner membrane protein                            | 0.89                                                                               | 0.45963 | -0.40                                                                               | 0.40058 | 0.63                                                                                | 0.12342 |
| STM3805         | yidH       | putative inner membrane protein                            | -0.84                                                                              | 0.14245 | -0.11                                                                               | 0.77694 | -0.58                                                                               | 0.26108 |
| STM3805         | yidH       | putative inner membrane protein                            | 0.27                                                                               | 0.70994 | -0.52                                                                               | 0.16883 | -1.38                                                                               | 0.12110 |
| STM3807         | yidE       | hypothetical protein STM3807                               | -0.61                                                                              | 0.18239 | -0.76                                                                               | 0.04230 | -1.69                                                                               | 0.01384 |
| STM3807         | yidE       | hypothetical protein STM3807                               | 1.10                                                                               | 0.12153 | -0.85                                                                               | 0.01449 | -0.33                                                                               | 0.45115 |
| STM3808,S       | ibpB       | small heat shock protein                                   | 2.54                                                                               | 0.00747 | 1.45                                                                                | 0.01014 | -0.36                                                                               | 0.48594 |
| STM3808,S       | ibpB       | small heat shock protein                                   | 3.17                                                                               | 0.00994 | 1.68                                                                                | 0.00586 | 0.98                                                                                | 0.14033 |
| STM3809,S       | ibpA       | small heat shock protein                                   | 1.40                                                                               | 0.10716 | 3.09                                                                                | 0.00011 | 0.12                                                                                | 0.85533 |
| STM3809,S       | ibpA       | small heat shock protein                                   | 2.55                                                                               | 0.01196 | 3.85                                                                                | 0.00002 | -0.23                                                                               | 0.64447 |
| STM3810         | yidQ       | putative outer membrane lipoprotein                        | 4.69                                                                               | 0.00567 | 1.06                                                                                | 0.01473 | 3.18                                                                                | 0.01146 |
| STM3810         | yidQ       | putative outer membrane lipoprotein                        | 0.69                                                                               | 0.44289 | 0.96                                                                                | 0.03019 | 1.37                                                                                | 0.22271 |
| STM3811         | yidR       | putative cytoplasmic protein                               | 0.73                                                                               | 0.12179 | 0.78                                                                                | 0.03288 | -0.31                                                                               | 0.40105 |
| STM3811         | yidR       | putative cytoplasmic protein                               | 0.04                                                                               | 0.93891 | 1.21                                                                                | 0.01719 | -0.33                                                                               | 0.44666 |
| STM3812         | ccmH       | putative heme lyase subunit                                | 1.46                                                                               | 0.03960 | 0.22                                                                                | 0.52942 | -0.61                                                                               | 0.27999 |
| STM3812         | ccmH       | putative heme lyase subunit                                | 1.66                                                                               | 0.03599 | 0.07                                                                                | 0.83807 | 0.00                                                                                | 0.99711 |
| STM3813         | ccmG       | heme lyase disulfide oxidoreductase                        | 0.16                                                                               | 0.85218 | -0.35                                                                               | 0.42611 | -0.70                                                                               | 0.18881 |
| STM3813         | ccmG       | heme lyase disulfide oxidoreductase                        | 1.21                                                                               | 0.24390 | -0.56                                                                               | 0.07358 | -0.12                                                                               | 0.80802 |
| STM3814         | ccmF       | cytochrome c-type biogenesis protein                       | -0.24                                                                              | 0.88783 | -1.15                                                                               | 0.08914 | -0.17                                                                               | 0.89908 |
| STM3814         | ccmF       | cytochrome c-type biogenesis protein                       | 0.40                                                                               | 0.71810 | -0.82                                                                               | 0.34067 | -0.25                                                                               | 0.82466 |
| STM3815         | ccmE       | periplasmic heme-dependent peroxidase                      | 2.37                                                                               | 0.01609 | 0.38                                                                                | 0.52684 | 0.17                                                                                | 0.76831 |
| STM3815         | ccmE       | periplasmic heme-dependent peroxidase                      | 2.44                                                                               | 0.00635 | 0.06                                                                                | 0.83199 | 0.25                                                                                | 0.55009 |
| STM3816         | ccmD       | heme exporter protein C                                    | -0.40                                                                              | 0.69343 | 0.41                                                                                | 0.15790 | -0.57                                                                               | 0.44245 |
| STM3816         | ccmD       | heme exporter protein C                                    | 0.59                                                                               | 0.23605 | -0.22                                                                               | 0.54491 | -1.67                                                                               | 0.00413 |
| STM3817         | ccmC       | heme exporter protein                                      | -0.17                                                                              | 0.73147 | 0.71                                                                                | 0.04804 | -0.70                                                                               | 0.15656 |
| STM3817         | ccmC       | heme exporter protein                                      | -0.07                                                                              | 0.93334 | -0.03                                                                               | 0.92849 | -1.73                                                                               | 0.02963 |
| STM3818         | ccmB       | heme exporter protein                                      | -1.19                                                                              | 0.03637 | 0.78                                                                                | 0.06956 | -0.98                                                                               | 0.25892 |
| STM3818         | ccmB       | heme exporter protein                                      | 0.90                                                                               | 0.30295 | 1.09                                                                                | 0.00660 | -1.49                                                                               | 0.01801 |
| STM3819         | ccmA       | heme exporter protein                                      | 0.45                                                                               | 0.28070 | -1.23                                                                               | 0.00736 | -0.76                                                                               | 0.05852 |
| STM3819         | ccmA       | heme exporter protein                                      | 0.96                                                                               | 0.07710 | -0.79                                                                               | 0.02134 | -0.27                                                                               | 0.51699 |
| STM3820         | STM3820    | putative cytochrome c peroxidase                           | -1.96                                                                              | 0.02162 | -0.14                                                                               | 0.88067 | -1.04                                                                               | 0.04449 |
| STM3820         | STM3820    | putative cytochrome c peroxidase                           | -0.50                                                                              | 0.37118 | -0.85                                                                               | 0.04537 | -0.53                                                                               | 0.36414 |
| STM3821         | torD       | chaperone protein TorD                                     | -0.06                                                                              | 0.90452 | 0.00                                                                                | 0.99930 | -0.03                                                                               | 0.95488 |
| STM3821         | torD       | chaperone protein TorD                                     | 1.48                                                                               | 0.01578 | 0.00                                                                                | 0.99835 | 2.28                                                                                | 0.00032 |
| STM3822         | torA       | trimethylamine N-oxide reductase subunit                   | 0.35                                                                               | 0.47183 | -0.22                                                                               | 0.48587 | -1.25                                                                               | 0.04006 |
| STM3822         | torA       | trimethylamine N-oxide reductase subunit                   | 0.94                                                                               | 0.21494 | -1.45                                                                               | 0.00594 | -0.06                                                                               | 0.93102 |
| STM3823         | torC       | trimethylamine N-oxide reductase cytochrome c-like subunit | 2.10                                                                               | 0.12917 | 0.42                                                                                | 0.19555 | 1.91                                                                                | 0.00167 |
| STM3823         | torC       | trimethylamine N-oxide reductase cytochrome c-like subunit | 3.78                                                                               | 0.06773 | -0.06                                                                               | 0.93270 | 2.71                                                                                | 0.00040 |
| STM3824         | torR       | response regulator                                         | -1.31                                                                              | 0.05585 | -1.05                                                                               | 0.00669 | -1.52                                                                               | 0.02567 |
| STM3824         | torR       | response regulator                                         | 0.24                                                                               | 0.69732 | -0.59                                                                               | 0.09943 | 0.30                                                                                | 0.52967 |
| STM3825         | torT       | periplasmic sensor                                         | -0.78                                                                              | 0.18562 | 0.17                                                                                | 0.68515 | -1.14                                                                               | 0.01694 |
| STM3825         | torT       | periplasmic sensor                                         | -0.14                                                                              | 0.77519 | -0.27                                                                               | 0.36212 | -0.67                                                                               | 0.13415 |

**Table S2.** Genome-wide expression of *Salmonella enterica* serovar Typhimurium inside fibroblasts

|                 |           |                                                           | Intracellular WT<br>24 h p.i.                                                      |         | Intracellular <i>phoP</i><br>24 h p.i.                                              |         | Extracellular WT<br>stationary phase                                                |         |
|-----------------|-----------|-----------------------------------------------------------|------------------------------------------------------------------------------------|---------|-------------------------------------------------------------------------------------|---------|-------------------------------------------------------------------------------------|---------|
|                 |           |                                                           | Relative to WT<br>exponential LB                                                   |         | Relative to <i>phoP</i><br>exponential LB                                           |         | Relative to WT<br>exponential LB                                                    |         |
|                 |           |                                                           |  |         |  |         |  |         |
| Systematic name | Gene      | Product                                                   | log2Ratio (M)                                                                      | p value | log2Ratio (M)                                                                       | p value | log2Ratio (M)                                                                       | p value |
| STM3826         | torS      | sensor kinase                                             | -0.10                                                                              | 0.85721 | 0.22                                                                                | 0.55038 | 0.12                                                                                | 0.78230 |
| STM3826         | torS      | sensor kinase                                             | 0.15                                                                               | 0.83532 | -1.53                                                                               | 0.01104 | 0.40                                                                                | 0.29616 |
| STM3827         | dgoT      | D-galactonate transport protein                           | 0.69                                                                               | 0.18080 | -0.77                                                                               | 0.02025 | 0.38                                                                                | 0.66972 |
| STM3827         | dgoT      | D-galactonate transport protein                           | 3.14                                                                               | 0.00546 | -0.59                                                                               | 0.26241 | 0.21                                                                                | 0.68835 |
| STM3828         | dgoA      | 2-oxo-3-deoxygalactonate 6-phosphate                      | 1.92                                                                               | 0.01997 | 1.00                                                                                | 0.03968 | 3.00                                                                                | 0.00014 |
| STM3828         | dgoA      | 2-oxo-3-deoxygalactonate 6-phosphate                      | 1.99                                                                               | 0.03449 | 1.23                                                                                | 0.00695 | 3.27                                                                                | 0.00122 |
| STM3829         | dgoK      | 2-oxo-3-deoxygalactonate kinase                           | 1.03                                                                               | 0.11936 | 1.38                                                                                | 0.00216 | 2.93                                                                                | 0.00066 |
| STM3829         | dgoK      | 2-oxo-3-deoxygalactonate kinase                           | 3.07                                                                               | 0.03097 | 1.05                                                                                | 0.01667 | 4.08                                                                                | 0.00006 |
| STM3830         | dgoR      | galactonate operon transcriptional repressor              | 1.20                                                                               | 0.02730 | 0.88                                                                                | 0.03735 | 2.87                                                                                | 0.00012 |
| STM3830         | dgoR      | galactonate operon transcriptional repressor              | 2.36                                                                               | 0.01099 | 0.81                                                                                | 0.03644 | 3.56                                                                                | 0.00009 |
| STM3831         | yidA      | putative hydrolase                                        | -0.56                                                                              | 0.33214 | -0.24                                                                               | 0.45514 | 0.67                                                                                | 0.24256 |
| STM3831         | yidA      | putative hydrolase                                        | 0.42                                                                               | 0.45678 | 1.18                                                                                | 0.17170 | 1.67                                                                                | 0.02227 |
| STM3832         | STM3832   | putative permease                                         | -0.37                                                                              | 0.41666 | -0.28                                                                               | 0.56384 | -0.67                                                                               | 0.32018 |
| STM3832         | STM3832   | putative permease                                         | 0.74                                                                               | 0.35844 | -0.61                                                                               | 0.23227 | -0.19                                                                               | 0.75724 |
| STM3833         | STM3833   | putative mandelate racemase                               | 0.39                                                                               | 0.61086 | 0.30                                                                                | 0.47781 | -0.51                                                                               | 0.48407 |
| STM3833         | STM3833   | putative mandelate racemase                               | 1.44                                                                               | 0.04995 | -0.03                                                                               | 0.95598 | 1.60                                                                                | 0.02422 |
| STM3834         | STM3834   | putative transcriptional regulator                        | -2.19                                                                              | 0.01001 | -1.62                                                                               | 0.00071 | -2.88                                                                               | 0.00052 |
| STM3834         | STM3834   | putative transcriptional regulator                        | -1.20                                                                              | 0.03925 | -1.64                                                                               | 0.00054 | -2.70                                                                               | 0.00048 |
| STM3835         | gyrB      | DNA gyrase subunit B                                      | -2.60                                                                              | 0.02946 | -1.89                                                                               | 0.00064 | -3.56                                                                               | 0.00011 |
| STM3835         | gyrB      | DNA gyrase subunit B                                      | -0.38                                                                              | 0.53467 | -1.59                                                                               | 0.00075 | -3.04                                                                               | 0.00017 |
| STM3836         | recF      | recombination protein F                                   | -2.68                                                                              | 0.00613 | -1.81                                                                               | 0.00223 | -2.17                                                                               | 0.00159 |
| STM3836         | recF      | recombination protein F                                   | -3.28                                                                              | 0.00635 | -1.89                                                                               | 0.00033 | -2.42                                                                               | 0.00074 |
| STM3837         | dnaN      | DNA polymerase III subunit beta                           | -2.20                                                                              | 0.02665 | -1.11                                                                               | 0.00749 | -3.56                                                                               | 0.00006 |
| STM3837         | dnaN      | DNA polymerase III subunit beta                           | -1.04                                                                              | 0.19012 | -0.80                                                                               | 0.03512 | -2.27                                                                               | 0.00157 |
| STM3838         | dnaA      | chromosomal replication initiation protein                | -2.25                                                                              | 0.03987 | -0.79                                                                               | 0.05991 | -2.04                                                                               | 0.01314 |
| STM3838         | dnaA      | chromosomal replication initiation protein                | -1.33                                                                              | 0.03218 | -0.92                                                                               | 0.02159 | -2.66                                                                               | 0.00014 |
| STM3839         | rpmH      | 50S ribosomal protein L34                                 | 0.23                                                                               | 0.66512 | -1.70                                                                               | 0.00441 | -2.95                                                                               | 0.00504 |
| STM3839         | rpmH      | 50S ribosomal protein L34                                 | -1.70                                                                              | 0.11670 | -1.80                                                                               | 0.00151 | -3.41                                                                               | 0.00008 |
| STM3840         | mpa       | ribonuclease P                                            | -3.30                                                                              | 0.02007 | -2.16                                                                               | 0.00067 | -5.67                                                                               | 0.00007 |
| STM3840         | mpa       | ribonuclease P                                            | -1.97                                                                              | 0.17750 | -1.98                                                                               | 0.00270 | -2.86                                                                               | 0.00056 |
| STM3842         | yidC      | inner membrane protein translocase component YidC         | -1.99                                                                              | 0.03179 | -2.02                                                                               | 0.00031 | -2.08                                                                               | 0.00064 |
| STM3842         | yidC      | inner membrane protein translocase component YidC         | 0.16                                                                               | 0.91601 | -2.02                                                                               | 0.00023 | -1.32                                                                               | 0.02205 |
| STM3843         | trmE      | tRNA modification GTPase                                  | 0.03                                                                               | 0.95334 | -0.60                                                                               | 0.08796 | -0.72                                                                               | 0.12689 |
| STM3843         | trmE      | tRNA modification GTPase                                  | 0.78                                                                               | 0.12389 | -0.27                                                                               | 0.52429 | 0.71                                                                                | 0.10658 |
| STM3845         | STM3845   | putative inner membrane protein                           | 1.02                                                                               | 0.06515 | -0.06                                                                               | 0.88330 | 2.18                                                                                | 0.00072 |
| STM3845         | STM3845   | putative inner membrane protein                           | 1.59                                                                               | 0.05468 | -0.34                                                                               | 0.50787 | 2.80                                                                                | 0.00041 |
| STM3846,s       | STM3846,s | putative reverse transcriptase                            | -1.47                                                                              | 0.03405 | -0.07                                                                               | 0.86576 | -0.35                                                                               | 0.43126 |
| STM3846,s       | STM3846,s | putative reverse transcriptase                            | -2.27                                                                              | 0.02538 | 0.03                                                                                | 0.96131 | 0.52                                                                                | 0.23886 |
| STM3847         | yidY      | putative transport protein                                | 2.01                                                                               | 0.06546 | -0.12                                                                               | 0.80561 | 0.19                                                                                | 0.74208 |
| STM3847         | yidY      | putative transport protein                                | 2.26                                                                               | 0.00743 | 0.33                                                                                | 0.64803 | 0.44                                                                                | 0.64753 |
| STM3848         | yidZ      | putative transcriptional regulator                        | -0.82                                                                              | 0.29785 | -1.22                                                                               | 0.03074 | -1.51                                                                               | 0.01981 |
| STM3848         | yidZ      | putative transcriptional regulator                        | -0.21                                                                              | 0.72602 | -1.64                                                                               | 0.00295 | -0.02                                                                               | 0.97929 |
| STM3849         | yieE      | putative cytoplasmic protein                              | -0.58                                                                              | 0.26606 | -0.47                                                                               | 0.12834 | -0.09                                                                               | 0.86651 |
| STM3849         | yieE      | putative cytoplasmic protein                              | 1.22                                                                               | 0.09130 | -1.08                                                                               | 0.01244 | -0.24                                                                               | 0.61492 |
| STM3850         | yieF      | putative oxidoreductase                                   | -1.58                                                                              | 0.01896 | -0.36                                                                               | 0.19503 | -1.66                                                                               | 0.00845 |
| STM3850         | yieF      | putative oxidoreductase                                   | -0.14                                                                              | 0.82430 | 0.12                                                                                | 0.70053 | -0.67                                                                               | 0.11995 |
| STM3851,S       | yieG      | hypothetical protein STM3851,S                            | -0.28                                                                              | 0.76178 | 0.26                                                                                | 0.37554 | -1.16                                                                               | 0.02380 |
| STM3851,S       | yieG      | hypothetical protein STM3851,S                            | 0.23                                                                               | 0.81252 | 0.21                                                                                | 0.56497 | -0.28                                                                               | 0.51048 |
| STM3852         | yieH      | putative phosphatase/phosphohexomutase                    | -0.35                                                                              | 0.50703 | -0.50                                                                               | 0.15361 | -1.54                                                                               | 0.00995 |
| STM3852         | yieH      | putative phosphatase/phosphohexomutase                    | 0.85                                                                               | 0.42386 | 0.02                                                                                | 0.96264 | -0.75                                                                               | 0.05581 |
| STM3853         | phoU      | high-affinity phosphate uptake regulatory protein         | -0.18                                                                              | 0.82145 | 0.14                                                                                | 0.71905 | -1.88                                                                               | 0.00187 |
| STM3853         | phoU      | high-affinity phosphate uptake regulatory protein         | -0.05                                                                              | 0.94753 | -0.10                                                                               | 0.80656 | -1.66                                                                               | 0.05763 |
| STM3854         | pstB      | high-affinity phosphate transporter                       | 1.82                                                                               | 0.01955 | 0.84                                                                                | 0.02416 | -0.58                                                                               | 0.28744 |
| STM3854         | pstB      | high-affinity phosphate transporter                       | 2.97                                                                               | 0.08560 | 0.87                                                                                | 0.01203 | 1.76                                                                                | 0.09205 |
| STM3855         | pstA      | high-affinity phosphate transporter                       | -0.13                                                                              | 0.91393 | 1.13                                                                                | 0.01024 | 1.62                                                                                | 0.00521 |
| STM3855         | pstA      | high-affinity phosphate transporter                       | -1.50                                                                              | 0.06522 | 0.36                                                                                | 0.47462 | 0.55                                                                                | 0.28060 |
| STM3856         | pstC      | high-affinity phosphate transporter                       | -0.46                                                                              | 0.49307 | 0.60                                                                                | 0.07975 | -1.68                                                                               | 0.00532 |
| STM3856         | pstC      | high-affinity phosphate transporter                       | 1.00                                                                               | 0.14379 | 0.63                                                                                | 0.06643 | -0.48                                                                               | 0.29394 |
| STM3857         | pstS      | high-affinity phosphate transporter                       | 1.85                                                                               | 0.01177 | 2.85                                                                                | 0.00010 | 0.13                                                                                | 0.80746 |
| STM3857         | pstS      | high-affinity phosphate transporter                       | 2.21                                                                               | 0.00789 | 2.98                                                                                | 0.00033 | 0.63                                                                                | 0.12630 |
| STM3858         | STM3858   | putative phosphotransferase system fructose-specific      | -0.68                                                                              | 0.14786 | 0.36                                                                                | 0.43313 | -0.91                                                                               | 0.03627 |
| STM3858         | STM3858   | putative phosphotransferase system fructose-specific      | 1.05                                                                               | 0.05012 | 0.17                                                                                | 0.59650 | -0.69                                                                               | 0.09372 |
| STM3859         | aroE      | shikimate 5-dehydrogenase                                 | -0.77                                                                              | 0.13713 | -1.21                                                                               | 0.02627 | -0.76                                                                               | 0.10841 |
| STM3859         | aroE      | shikimate 5-dehydrogenase                                 | -0.16                                                                              | 0.83463 | -1.47                                                                               | 0.00158 | 0.73                                                                                | 0.10782 |
| STM3860         | STM3860   | putative dipeptide/oligopeptide/nickel ABC-type transport | -2.01                                                                              | 0.00984 | -1.90                                                                               | 0.00057 | -3.47                                                                               | 0.00008 |
| STM3860         | STM3860   | putative dipeptide/oligopeptide/nickel ABC-type transport | -1.86                                                                              | 0.12680 | -1.20                                                                               | 0.00325 | -1.92                                                                               | 0.00537 |
| STM3861         | glmS      | D-fructose-6-phosphate amidotransferase                   | -1.14                                                                              | 0.05655 | -0.81                                                                               | 0.02108 | -2.69                                                                               | 0.00021 |
| STM3861         | glmS      | D-fructose-6-phosphate amidotransferase                   | -0.69                                                                              | 0.45900 | -1.19                                                                               | 0.00418 | -3.07                                                                               | 0.00021 |
| STM3862         | glmU      | bifunctional N-acetylglucosamine-1-phosphate              | -1.84                                                                              | 0.02576 | -2.14                                                                               | 0.00024 | -3.05                                                                               | 0.00041 |
| STM3862         | glmU      | bifunctional N-acetylglucosamine-1-phosphate              | -2.15                                                                              | 0.02058 | -2.28                                                                               | 0.00057 | -2.31                                                                               | 0.00063 |

**Table S2.** Genome-wide expression of *Salmonella enterica* serovar Typhimurium inside fibroblasts

Intracellular WT 24 h p.i.      Intracellular *phoP* 24 h p.i.      Extracellular WT stationary phase

Relative to WT exponential LB      Relative to *phoP* exponential LB      Relative to WT exponential LB



| Systematic name | Gene    | Product                                                 | log2Ratio (M) | p value | log2Ratio (M) | p value | log2Ratio (M) | p value |
|-----------------|---------|---------------------------------------------------------|---------------|---------|---------------|---------|---------------|---------|
| STM3863         | STM3863 | putative permease                                       | -1.95         | 0.02538 | -1.31         | 0.06079 | -1.19         | 0.01509 |
| STM3863         | STM3863 | putative permease                                       | -2.05         | 0.01038 | -2.00         | 0.00042 | -1.70         | 0.01003 |
| STM3864         | atpC    | ATP synthase subunit epsilon                            | -2.29         | 0.03348 | -1.29         | 0.00601 | -2.72         | 0.00289 |
| STM3864         | atpC    | ATP synthase subunit epsilon                            | -1.83         | 0.03441 | -1.39         | 0.00127 | -3.91         | 0.00012 |
| STM3865         | atpD    | ATP synthase subunit B                                  | -2.77         | 0.00595 | -1.26         | 0.00213 | -3.99         | 0.00004 |
| STM3865         | atpD    | ATP synthase subunit B                                  | -0.85         | 0.14585 | -1.07         | 0.01188 | -3.20         | 0.00041 |
| STM3866         | atpG    | ATP synthase subunit C                                  | -2.04         | 0.01397 | -1.98         | 0.00100 | -4.45         | 0.00005 |
| STM3866         | atpG    | ATP synthase subunit C                                  | -1.78         | 0.01114 | -1.78         | 0.00079 | -3.71         | 0.00007 |
| STM3867         | atpA    | ATP synthase subunit A                                  | -3.90         | 0.01262 | -2.40         | 0.00012 | -4.54         | 0.00010 |
| STM3867         | atpA    | ATP synthase subunit A                                  | -3.01         | 0.01716 | -2.69         | 0.00015 | -4.84         | 0.00006 |
| STM3868         | atpH    | ATP synthase subunit D                                  | -3.47         | 0.00512 | -2.90         | 0.00010 | -5.02         | 0.00002 |
| STM3868         | atpH    | ATP synthase subunit D                                  | -3.17         | 0.00722 | -2.61         | 0.00006 | -5.24         | 0.00003 |
| STM3869         | atpF    | ATP synthase subunit B                                  | -5.00         | 0.02665 | -3.45         | 0.00006 | -4.81         | 0.00003 |
| STM3869         | atpF    | ATP synthase subunit B                                  | -3.65         | 0.01448 | -2.53         | 0.00017 | -5.49         | 0.00002 |
| STM3870         | atpE    | ATP synthase subunit C                                  | -3.26         | 0.00537 | -3.19         | 0.00003 | -5.15         | 0.00003 |
| STM3870         | atpE    | ATP synthase subunit C                                  | -2.57         | 0.01056 | -2.79         | 0.00010 | -5.47         | 0.00005 |
| STM3871         | atpB    | ATP synthase subunit A                                  | -3.74         | 0.00512 | -2.98         | 0.00019 | -4.71         | 0.00007 |
| STM3871         | atpB    | ATP synthase subunit A                                  | -2.00         | 0.01447 | -2.03         | 0.00142 | -2.36         | 0.00112 |
| STM3871         | atpB    | ATP synthase subunit A                                  | -3.44         | 0.00512 | -2.74         | 0.00010 | -4.53         | 0.00006 |
| STM3871         | atpB    | ATP synthase subunit A                                  | -1.98         | 0.03067 | -1.70         | 0.00301 | -2.88         | 0.00095 |
| STM3872         | atpI    | ATP synthase subunit I                                  | -3.46         | 0.00512 | -2.50         | 0.00009 | -3.88         | 0.00006 |
| STM3872         | atpI    | ATP synthase subunit I                                  | -2.42         | 0.00876 | -2.92         | 0.00006 | -4.15         | 0.00010 |
| STM3873,S       | gidB    | glucose-inhibited division protein B                    | -1.52         | 0.02655 | -1.41         | 0.01852 | -2.51         | 0.00024 |
| STM3873,S       | gidB    | glucose-inhibited division protein B                    | -0.68         | 0.14889 | -2.06         | 0.00023 | -1.86         | 0.00258 |
| STM3874         | gidA    | glucose-inhibited division protein A                    | -1.59         | 0.09492 | -1.10         | 0.00423 | -2.30         | 0.00066 |
| STM3874         | gidA    | glucose-inhibited division protein A                    | -1.02         | 0.18683 | -1.32         | 0.00394 | -1.73         | 0.03264 |
| STM3875         | mioC    | flavodoxin                                              | -2.69         | 0.01363 | -0.93         | 0.01334 | -3.27         | 0.00009 |
| STM3875         | mioC    | flavodoxin                                              | -1.08         | 0.21141 | -0.90         | 0.02931 | -2.40         | 0.00037 |
| STM3876         | asnC    | transcriptional regulator                               | -1.00         | 0.13857 | -0.62         | 0.09352 | -2.07         | 0.00683 |
| STM3876         | asnC    | transcriptional regulator                               | 0.61          | 0.31766 | -0.60         | 0.11392 | -1.32         | 0.01198 |
| STM3877         | asnA    | asparagine synthetase AsnA                              | -0.65         | 0.17442 | 0.69          | 0.40875 | -0.52         | 0.26545 |
| STM3877         | asnA    | asparagine synthetase AsnA                              | -0.01         | 0.98974 | 0.02          | 0.96117 | -0.88         | 0.20195 |
| STM3878,S       | yieM    | putative inner membrane protein                         | -0.12         | 0.84673 | 1.02          | 0.01175 | -0.01         | 0.97744 |
| STM3878,S       | yieM    | putative inner membrane protein                         | 0.95          | 0.12941 | 1.00          | 0.04081 | 1.63          | 0.00382 |
| STM3879         | yieN    | putative regulatory protein                             | -0.31         | 0.52193 | -0.04         | 0.91326 | 0.27          | 0.60752 |
| STM3879         | yieN    | putative regulatory protein                             | -0.38         | 0.53843 | -0.65         | 0.06158 | -1.29         | 0.12410 |
| STM3880         | kup     | low-affinity potassium transport protein                | -1.14         | 0.16023 | -3.30         | 0.00144 | -1.63         | 0.00389 |
| STM3880         | kup     | low-affinity potassium transport protein                | 0.41          | 0.50186 | -2.96         | 0.00004 | -1.48         | 0.02089 |
| STM3881         | rbsD    | high-affinity D-ribose transport protein                | -2.03         | 0.01449 | -4.58         | 0.00001 | -2.29         | 0.00326 |
| STM3881         | rbsD    | high-affinity D-ribose transport protein                | -1.62         | 0.03130 | -4.40         | 0.00001 | -1.90         | 0.00854 |
| STM3882         | rbsA    | high-affinity D-ribose transport protein                | -1.47         | 0.05064 | -3.68         | 0.00005 | -2.88         | 0.00037 |
| STM3882         | rbsA    | high-affinity D-ribose transport protein                | -0.33         | 0.69269 | -4.18         | 0.00003 | -2.56         | 0.00186 |
| STM3883         | rbsC    | ribose high-affinity ABC transporter permease component | -2.38         | 0.07521 | -3.16         | 0.00054 | -2.73         | 0.00193 |
| STM3883         | rbsC    | ribose high-affinity ABC transporter permease component | -1.80         | 0.09334 | -3.34         | 0.00033 | -1.90         | 0.01429 |
| STM3884         | rbsB    | D-ribose transport protein                              | -1.57         | 0.10461 | -0.78         | 0.11302 | -0.86         | 0.18831 |
| STM3884         | rbsB    | D-ribose transport protein                              | -0.63         | 0.37989 | -0.45         | 0.35439 | -0.09         | 0.87905 |
| STM3885         | rbsK    | ribokinase                                              | -1.89         | 0.04427 | -2.16         | 0.00031 | -1.60         | 0.11040 |
| STM3885         | rbsK    | ribokinase                                              | -0.38         | 0.62494 | -1.94         | 0.00083 | -0.68         | 0.18600 |
| STM3886         | rbsR    | rbs operon transcriptional repressor                    | -0.33         | 0.54428 | -2.09         | 0.00033 | -1.03         | 0.03788 |
| STM3886         | rbsR    | rbs operon transcriptional repressor                    | -0.28         | 0.53036 | -2.32         | 0.00025 | -0.48         | 0.28714 |
| STM3887         | yieO    | putative transport protein                              | 0.08          | 0.85656 | -1.91         | 0.00026 | -0.08         | 0.83189 |
| STM3887         | yieO    | putative transport protein                              | 0.49          | 0.24958 | -2.44         | 0.00168 | 0.36          | 0.56077 |
| STM3888         | yieP    | putative regulatory protein                             | -2.17         | 0.01479 | -0.60         | 0.07988 | -0.01         | 0.97553 |
| STM3888         | yieP    | putative regulatory protein                             | -0.53         | 0.33155 | -0.07         | 0.84078 | 0.54          | 0.23461 |
| STM3889         | rrsC    | STM3889                                                 | -2.53         | 0.06106 | 1.13          | 0.04074 | -0.86         | 0.09052 |
| STM3889         | rrsC    | STM3889                                                 | -2.08         | 0.11630 | 0.73          | 0.15735 | -0.27         | 0.66500 |
| STM3890         | gltU    | STM3890                                                 | 1.25          | 0.09657 | 0.94          | 0.03791 | 0.99          | 0.02175 |
| STM3890         | gltU    | STM3890                                                 | 1.45          | 0.03649 | 0.37          | 0.27631 | 1.73          | 0.00404 |
| STM3891         | rrfC    | STM3891                                                 | -2.04         | 0.19558 | 0.57          | 0.08831 | 0.12          | 0.80086 |
| STM3891         | rrfC    | STM3891                                                 | -1.46         | 0.37729 | 0.82          | 0.02627 | 0.98          | 0.05524 |
| STM3894         | rrfC    | STM3894                                                 | 0.55          | 0.55441 | 0.17          | 0.72464 | 0.80          | 0.13327 |
| STM3894         | rrfC    | STM3894                                                 | 1.20          | 0.06515 | 0.43          | 0.24930 | 1.09          | 0.03784 |
| STM3895         | aspT    | STM3895                                                 | -1.47         | 0.02440 | 0.27          | 0.58656 | 0.20          | 0.63830 |
| STM3895         | aspT    | STM3895                                                 | -0.53         | 0.40523 | 0.68          | 0.18740 | 0.30          | 0.52364 |
| STM3896         | trpT    | STM3896                                                 | -1.16         | 0.03339 | -0.18         | 0.53582 | 1.69          | 0.00686 |
| STM3896         | trpT    | STM3896                                                 | -0.49         | 0.31954 | -0.11         | 0.81422 | 2.16          | 0.01256 |
| STM3897         | yifA    | transcriptional regulator HdfR                          | -1.11         | 0.08539 | 0.47          | 0.13462 | 1.00          | 0.01562 |
| STM3897         | yifA    | transcriptional regulator HdfR                          | -0.09         | 0.82622 | 0.65          | 0.04857 | 1.52          | 0.00416 |
| STM3898         | yifE    | putative transcriptional regulator                      | -3.02         | 0.01262 | -2.07         | 0.00201 | -1.44         | 0.00339 |
| STM3898         | yifE    | putative transcriptional regulator                      | -1.56         | 0.02790 | -1.59         | 0.00368 | -1.15         | 0.01316 |

**Table S2.** Genome-wide expression of *Salmonella enterica* serovar Typhimurium inside fibroblasts

|                 |         |                                                        | Intracellular WT<br>24 h p.i.                                                      |         | Intracellular <i>phoP</i><br>24 h p.i.                                              |         | Extracellular WT<br>stationary phase                                                |         |
|-----------------|---------|--------------------------------------------------------|------------------------------------------------------------------------------------|---------|-------------------------------------------------------------------------------------|---------|-------------------------------------------------------------------------------------|---------|
|                 |         |                                                        | Relative to WT<br>exponential LB                                                   |         | Relative to <i>phoP</i><br>exponential LB                                           |         | Relative to WT<br>exponential LB                                                    |         |
|                 |         |                                                        |  |         |  |         |  |         |
| Systematic name | Gene    | Product                                                | log2Ratio (M)                                                                      | p value | log2Ratio (M)                                                                       | p value | log2Ratio (M)                                                                       | p value |
| STM3899         | yifB    | putative magnesium chelatase subunit ChII              | -1.06                                                                              | 0.40170 | -0.45                                                                               | 0.22949 | 0.55                                                                                | 0.19244 |
| STM3899         | yifB    | putative magnesium chelatase subunit ChII              | -1.14                                                                              | 0.35943 | -1.77                                                                               | 0.01009 | -1.67                                                                               | 0.25266 |
| STM3901         | ilvG    | acetolactate synthase II large subunit                 | -0.79                                                                              | 0.13484 | 0.61                                                                                | 0.14228 | -1.72                                                                               | 0.00271 |
| STM3901         | ilvG    | acetolactate synthase II large subunit                 | 0.69                                                                               | 0.22160 | 0.64                                                                                | 0.07113 | 0.35                                                                                | 0.58913 |
| STM3902         | ilvM    | acetolactate synthase II small subunit                 | 0.16                                                                               | 0.71390 | 0.74                                                                                | 0.05133 | -1.36                                                                               | 0.00661 |
| STM3902         | ilvM    | acetolactate synthase II small subunit                 | 0.52                                                                               | 0.42109 | 0.77                                                                                | 0.03814 | 0.24                                                                                | 0.55906 |
| STM3903         | ilvE    | branched-chain amino acid aminotransferase             | 0.30                                                                               | 0.81994 | 0.58                                                                                | 0.06503 | -0.67                                                                               | 0.18380 |
| STM3903         | ilvE    | branched-chain amino acid aminotransferase             | 1.78                                                                               | 0.15901 | 0.17                                                                                | 0.69529 | 0.52                                                                                | 0.48325 |
| STM3904         | ilvD    | dihydroxy-acid dehydratase                             | -2.85                                                                              | 0.00748 | -0.49                                                                               | 0.08968 | -2.26                                                                               | 0.00228 |
| STM3904         | ilvD    | dihydroxy-acid dehydratase                             | 1.19                                                                               | 0.03614 | -0.82                                                                               | 0.02505 | -2.85                                                                               | 0.02077 |
| STM3905         | ilvA    | threonine dehydratase                                  | 0.93                                                                               | 0.15335 | 0.58                                                                                | 0.07933 | 1.71                                                                                | 0.00386 |
| STM3905         | ilvA    | threonine dehydratase                                  | 0.61                                                                               | 0.19804 | 0.42                                                                                | 0.20997 | 0.20                                                                                | 0.58716 |
| STM3906         | STM3906 | putative cytoplasmic protein                           | 1.45                                                                               | 0.07710 | 2.48                                                                                | 0.00055 | 0.79                                                                                | 0.08594 |
| STM3906         | STM3906 | putative cytoplasmic protein                           | 1.72                                                                               | 0.03490 | 2.42                                                                                | 0.00024 | 1.86                                                                                | 0.00255 |
| STM3907         | STM3907 | putative cytoplasmic protein                           | 0.41                                                                               | 0.60864 | 0.81                                                                                | 0.05608 | 0.77                                                                                | 0.28378 |
| STM3907         | STM3907 | putative cytoplasmic protein                           | 4.05                                                                               | 0.00623 | 1.17                                                                                | 0.02110 | 1.58                                                                                | 0.01606 |
| STM3908         | ilvY    | regulatory protein                                     | -0.39                                                                              | 0.43614 | 1.03                                                                                | 0.06866 | -1.23                                                                               | 0.01562 |
| STM3908         | ilvY    | regulatory protein                                     | 0.39                                                                               | 0.46005 | 0.61                                                                                | 0.15984 | -0.61                                                                               | 0.15109 |
| STM3909         | ilvC    | ketol-acid reductoisomerase                            | 0.09                                                                               | 0.87678 | 1.02                                                                                | 0.00599 | -0.97                                                                               | 0.03080 |
| STM3909         | ilvC    | ketol-acid reductoisomerase                            | 1.05                                                                               | 0.33302 | 0.46                                                                                | 0.20599 | -0.09                                                                               | 0.86413 |
| STM3910         | ppiC    | peptidyl-prolyl cis-trans isomerase C                  | -1.38                                                                              | 0.02655 | -0.30                                                                               | 0.28308 | -1.85                                                                               | 0.00804 |
| STM3910         | ppiC    | peptidyl-prolyl cis-trans isomerase C                  | 0.12                                                                               | 0.78940 | -0.49                                                                               | 0.08468 | -1.40                                                                               | 0.05017 |
| STM3911         | STM3911 | putative inner membrane protein                        | -0.49                                                                              | 0.43156 | -1.28                                                                               | 0.00511 | -1.89                                                                               | 0.00294 |
| STM3911         | STM3911 | putative inner membrane protein                        | 0.28                                                                               | 0.50275 | -0.74                                                                               | 0.06480 | -0.37                                                                               | 0.39181 |
| STM3912         | rep     | ATP-dependent DNA helicase rep                         | 0.06                                                                               | 0.88684 | 0.40                                                                                | 0.27271 | 0.00                                                                                | 0.99711 |
| STM3912         | rep     | ATP-dependent DNA helicase rep                         | 0.97                                                                               | 0.06914 | 0.18                                                                                | 0.52871 | 0.62                                                                                | 0.14039 |
| STM3913         | gppA    | guanosine pentaphosphatase/exopolyphosphatase          | -0.76                                                                              | 0.26777 | -0.06                                                                               | 0.85712 | -1.54                                                                               | 0.09029 |
| STM3913         | gppA    | guanosine pentaphosphatase/exopolyphosphatase          | -0.51                                                                              | 0.28081 | -0.29                                                                               | 0.41088 | -0.99                                                                               | 0.06134 |
| STM3914         | rhlB    | ATP-dependent RNA helicase                             | -2.53                                                                              | 0.00581 | -1.59                                                                               | 0.00082 | -2.43                                                                               | 0.00061 |
| STM3914         | rhlB    | ATP-dependent RNA helicase                             | -2.20                                                                              | 0.00700 | -1.88                                                                               | 0.00047 | -2.49                                                                               | 0.00025 |
| STM3915         | trxA    | thioredoxin                                            | -2.47                                                                              | 0.00700 | -1.31                                                                               | 0.00165 | -2.26                                                                               | 0.00039 |
| STM3915         | trxA    | thioredoxin                                            | -1.99                                                                              | 0.02039 | -1.08                                                                               | 0.00529 | -2.47                                                                               | 0.00088 |
| STM3917         | rho     | transcription termination factor Rho                   | -0.92                                                                              | 0.06414 | -0.59                                                                               | 0.07369 | -1.80                                                                               | 0.04523 |
| STM3917         | rho     | transcription termination factor Rho                   | -0.75                                                                              | 0.09664 | -0.68                                                                               | 0.06196 | -2.29                                                                               | 0.00046 |
| STM3918         | rfe     | undecaprenyl-phosphate N-acetylglucosaminyltransferase | -1.72                                                                              | 0.02002 | -0.94                                                                               | 0.03288 | -1.85                                                                               | 0.00149 |
| STM3918         | rfe     | undecaprenyl-phosphate N-acetylglucosaminyltransferase | -1.18                                                                              | 0.08204 | -0.78                                                                               | 0.02277 | -2.28                                                                               | 0.00224 |
| STM3919         | wzzE    | enterobacterial common antigen chain length regulator  | -1.67                                                                              | 0.01536 | -1.59                                                                               | 0.00073 | -2.12                                                                               | 0.00064 |
| STM3919         | wzzE    | enterobacterial common antigen chain length regulator  | -1.28                                                                              | 0.02654 | -1.60                                                                               | 0.00055 | -1.53                                                                               | 0.00314 |
| STM3920         | wecB    | UDP-N-acetyl glucosamine-2-epimerase                   | -1.76                                                                              | 0.18480 | -1.82                                                                               | 0.00108 | -1.37                                                                               | 0.01003 |
| STM3920         | wecB    | UDP-N-acetyl glucosamine-2-epimerase                   | -1.66                                                                              | 0.04606 | -1.89                                                                               | 0.00040 | -1.69                                                                               | 0.02918 |
| STM3921         | wecC    | UDP-N-acetyl-D-mannosaminuronic acid dehydrogenase     | -2.23                                                                              | 0.01321 | -2.12                                                                               | 0.00024 | -3.36                                                                               | 0.00015 |
| STM3921         | wecC    | UDP-N-acetyl-D-mannosaminuronic acid dehydrogenase     | -1.62                                                                              | 0.08941 | -1.78                                                                               | 0.00111 | -3.56                                                                               | 0.00008 |
| STM3922         | rffG    | dTDP-glucose 4,6-dehydratase                           | -1.47                                                                              | 0.13182 | -1.85                                                                               | 0.00303 | -2.13                                                                               | 0.01282 |
| STM3922         | rffG    | dTDP-glucose 4,6-dehydratase                           | -0.76                                                                              | 0.44770 | -2.05                                                                               | 0.00043 | -1.75                                                                               | 0.00194 |
| STM3923         | rffH    | glucose-1-phosphate thymidyl transferase               | -2.06                                                                              | 0.01099 | -1.05                                                                               | 0.02613 | -2.54                                                                               | 0.00031 |
| STM3923         | rffH    | glucose-1-phosphate thymidyl transferase               | -2.05                                                                              | 0.01578 | -1.99                                                                               | 0.00055 | -3.86                                                                               | 0.00111 |
| STM3924         | wecD    | lipopolysaccharide biosynthetic protein                | -2.37                                                                              | 0.00719 | -2.16                                                                               | 0.00019 | -2.97                                                                               | 0.00021 |
| STM3924         | wecD    | lipopolysaccharide biosynthetic protein                | 0.26                                                                               | 0.54785 | -1.89                                                                               | 0.00052 | -2.58                                                                               | 0.00141 |
| STM3925         | wecE    | TDP-4-oxo-6-deoxy-D-glucose transaminase               | -1.35                                                                              | 0.12290 | -2.01                                                                               | 0.00142 | -2.16                                                                               | 0.00131 |
| STM3925         | wecE    | TDP-4-oxo-6-deoxy-D-glucose transaminase               | -1.65                                                                              | 0.01445 | -2.18                                                                               | 0.00063 | -1.83                                                                               | 0.00140 |
| STM3926         | wzxE    | O-antigen translocase                                  | -1.63                                                                              | 0.02326 | -1.57                                                                               | 0.00239 | -1.03                                                                               | 0.01689 |
| STM3926         | wzxE    | O-antigen translocase                                  | -1.56                                                                              | 0.02177 | -2.05                                                                               | 0.00046 | -1.82                                                                               | 0.00097 |
| STM3927         | STM3927 | 4-alpha-L-fucosyltransferase                           | -0.99                                                                              | 0.11338 | -1.85                                                                               | 0.00039 | -1.97                                                                               | 0.00297 |
| STM3927         | STM3927 | 4-alpha-L-fucosyltransferase                           | 0.16                                                                               | 0.73737 | -1.59                                                                               | 0.00222 | 0.05                                                                                | 0.92626 |
| STM3928         | wecF    | putative enterobacterial common antigen polymerase     | -0.60                                                                              | 0.45204 | -1.32                                                                               | 0.00325 | -0.41                                                                               | 0.30030 |
| STM3928         | wecF    | putative enterobacterial common antigen polymerase     | -0.39                                                                              | 0.46748 | -1.59                                                                               | 0.01214 | -0.87                                                                               | 0.07894 |
| STM3929         | wecG    | putative UDP-N-acetyl-D-mannosaminuronic acid          | -1.59                                                                              | 0.01425 | -1.20                                                                               | 0.07891 | -0.79                                                                               | 0.07793 |
| STM3929         | wecG    | putative UDP-N-acetyl-D-mannosaminuronic acid          | -1.78                                                                              | 0.02840 | -1.81                                                                               | 0.00080 | -1.93                                                                               | 0.10444 |
| STM3930         | yifK    | putative amino acid transport protein                  | -1.99                                                                              | 0.01428 | -1.81                                                                               | 0.00062 | -0.36                                                                               | 0.31998 |
| STM3930         | yifK    | putative amino acid transport protein                  | -1.21                                                                              | 0.08383 | -1.50                                                                               | 0.00286 | -0.36                                                                               | 0.42770 |
| STM3931         | argX    | STM3931                                                | -3.91                                                                              | 0.00783 | -0.70                                                                               | 0.27037 | 1.43                                                                                | 0.04292 |
| STM3931         | argX    | STM3931                                                | -2.72                                                                              | 0.00547 | -0.48                                                                               | 0.39038 | 1.97                                                                                | 0.00098 |
| STM3932         | hisR    | STM3932                                                | -1.00                                                                              | 0.09655 | 0.03                                                                                | 0.96561 | 2.92                                                                                | 0.00050 |
| STM3932         | hisR    | STM3932                                                | -0.09                                                                              | 0.83951 | 0.23                                                                                | 0.74090 | 3.86                                                                                | 0.00007 |
| STM3933         | leuT    | STM3933                                                | -1.47                                                                              | 0.03896 | -2.34                                                                               | 0.00048 | -0.07                                                                               | 0.87028 |
| STM3933         | leuT    | STM3933                                                | -0.97                                                                              | 0.07431 | -2.36                                                                               | 0.00060 | -0.56                                                                               | 0.16042 |
| STM3934         | proM    | STM3934                                                | -2.20                                                                              | 0.04107 | -1.34                                                                               | 0.01056 | 0.83                                                                                | 0.14679 |
| STM3934         | proM    | STM3934                                                | -2.12                                                                              | 0.06218 | -1.99                                                                               | 0.00130 | 0.62                                                                                | 0.21366 |
| STM3935         | hemY    | heme biosynthetic protein                              | -2.03                                                                              | 0.08177 | -1.54                                                                               | 0.00128 | -1.96                                                                               | 0.00078 |
| STM3935         | hemY    | heme biosynthetic protein                              | -0.65                                                                              | 0.66936 | -1.89                                                                               | 0.00052 | -1.62                                                                               | 0.00228 |

**Table S2.** Genome-wide expression of *Salmonella enterica* serovar Typhimurium inside fibroblasts

Intracellular WT 24 h p.i.      Intracellular *phoP* 24 h p.i.      Extracellular WT stationary phase

Relative to WT exponential LB      Relative to *phoP* exponential LB      Relative to WT exponential LB



| Systematic name | Gene    | Product                                                   | log2Ratio (M) | p value | log2Ratio (M) | p value | log2Ratio (M) | p value |
|-----------------|---------|-----------------------------------------------------------|---------------|---------|---------------|---------|---------------|---------|
| STM3936         | hemX    | uroporphyrinogen III methylase                            | -2.39         | 0.00648 | -1.71         | 0.00214 | -2.21         | 0.00098 |
| STM3936         | hemX    | uroporphyrinogen III methylase                            | -1.61         | 0.05040 | -1.75         | 0.00098 | -2.48         | 0.00196 |
| STM3937         | STM3937 | uroporphyrinogen-III synthetase                           | -3.02         | 0.00689 | -1.72         | 0.00046 | -1.37         | 0.00664 |
| STM3937         | STM3937 | uroporphyrinogen-III synthetase                           | -2.08         | 0.01194 | -1.27         | 0.01062 | -1.55         | 0.00890 |
| STM3938         | hemC    | porphobilinogen deaminase                                 | -2.66         | 0.01024 | -1.95         | 0.00091 | -1.62         | 0.00224 |
| STM3938         | hemC    | porphobilinogen deaminase                                 | -3.03         | 0.00674 | -2.11         | 0.00084 | -2.50         | 0.01413 |
| STM3939         | cyaA    | adenylate cyclase                                         | -0.10         | 0.90452 | -0.28         | 0.32585 | -0.13         | 0.83180 |
| STM3939         | cyaA    | adenylate cyclase                                         | 0.07          | 0.90762 | -0.55         | 0.07975 | 1.55          | 0.10916 |
| STM3940         | STM3940 | putative inner membrane protein                           | -0.60         | 0.20600 | -0.33         | 0.33152 | -0.23         | 0.58513 |
| STM3940         | STM3940 | putative inner membrane protein                           | -0.89         | 0.08022 | -0.50         | 0.13284 | -0.41         | 0.31828 |
| STM3941         | STM3941 | putative inner membrane protein                           | -1.37         | 0.10686 | 0.08          | 0.95389 | -1.21         | 0.01793 |
| STM3941         | STM3941 | putative inner membrane protein                           | -0.77         | 0.12940 | -0.67         | 0.07873 | -0.92         | 0.08864 |
| STM3943         | cyaY    | frataxin-like protein                                     | -1.31         | 0.02603 | 0.00          | 0.99589 | -0.85         | 0.05086 |
| STM3943         | cyaY    | frataxin-like protein                                     | -0.18         | 0.72631 | -0.91         | 0.01462 | -0.81         | 0.06418 |
| STM3944         | STM3944 | putative inner membrane protein                           | -0.28         | 0.51146 | -0.12         | 0.71831 | -0.86         | 0.04384 |
| STM3944         | STM3944 | putative inner membrane protein                           | 0.17          | 0.69393 | -0.08         | 0.82689 | -0.18         | 0.73273 |
| STM3946         | yifL    | putative outer membrane lipoprotein                       | -0.41         | 0.64560 | 0.05          | 0.88176 | -0.43         | 0.31649 |
| STM3946         | yifL    | putative outer membrane lipoprotein                       | 0.18          | 0.66916 | -0.31         | 0.37745 | -0.14         | 0.74824 |
| STM3947         | dapF    | diaminopimelate epimerase                                 | -2.27         | 0.01032 | -0.63         | 0.05305 | -1.53         | 0.00231 |
| STM3947         | dapF    | diaminopimelate epimerase                                 | -1.84         | 0.05742 | -0.53         | 0.10203 | -1.10         | 0.12656 |
| STM3948         | yigA    | putative cytoplasmic protein                              | -2.23         | 0.01263 | -0.78         | 0.05574 | -2.59         | 0.00257 |
| STM3948         | yigA    | putative cytoplasmic protein                              | -0.93         | 0.36920 | -1.10         | 0.00932 | -1.88         | 0.00375 |
| STM3949         | xerC    | tyrosine recombinase                                      | -2.04         | 0.00913 | -1.13         | 0.00513 | -2.66         | 0.00332 |
| STM3949         | xerC    | tyrosine recombinase                                      | 1.01          | 0.64120 | -1.10         | 0.03798 | -2.54         | 0.00437 |
| STM3950         | yigB    | putative hydrolase                                        | -1.03         | 0.07572 | -1.19         | 0.02626 | -0.37         | 0.34979 |
| STM3950         | yigB    | putative hydrolase                                        | -0.55         | 0.39392 | -0.59         | 0.07629 | -0.52         | 0.24526 |
| STM3951         | uvrD    | DNA-dependent ATPase I/helicase II                        | -1.56         | 0.03367 | -0.13         | 0.71310 | -0.94         | 0.12985 |
| STM3951         | uvrD    | DNA-dependent ATPase I/helicase II                        | -0.36         | 0.60323 | -0.27         | 0.41161 | -0.51         | 0.42843 |
| STM3952         | corA    | Mg2+/Ni2+/Co2+ transport protein                          | 0.95          | 0.27365 | -0.13         | 0.68515 | -1.07         | 0.46256 |
| STM3952         | corA    | Mg2+/Ni2+/Co2+ transport protein                          | 0.28          | 0.64804 | 0.10          | 0.78944 | 0.60          | 0.25873 |
| STM3953         | yigF    | putative inner membrane protein                           | 0.93          | 0.13409 | 0.06          | 0.88334 | 1.10          | 0.02478 |
| STM3953         | yigF    | putative inner membrane protein                           | 1.63          | 0.07360 | 0.50          | 0.21299 | 0.31          | 0.68330 |
| STM3955         | rarD    | chloramphenicol resistance                                | -0.88         | 0.08479 | -1.53         | 0.00096 | -1.57         | 0.00575 |
| STM3955         | rarD    | chloramphenicol resistance                                | 0.93          | 0.35003 | -1.08         | 0.00665 | -1.38         | 0.01440 |
| STM3956         | yigI    | hypothetical protein STM3956                              | -0.95         | 0.11026 | 0.85          | 0.01893 | -0.05         | 0.95646 |
| STM3956         | yigI    | hypothetical protein STM3956                              | 1.04          | 0.31379 | 0.98          | 0.01581 | -0.30         | 0.41871 |
| STM3957         | pldA    | outer membrane phospholipase A precursor                  | -1.29         | 0.04995 | -0.55         | 0.09861 | -0.81         | 0.10386 |
| STM3957         | pldA    | outer membrane phospholipase A precursor                  | 0.00          | 0.99561 | -0.57         | 0.18368 | 0.75          | 0.09055 |
| STM3958         | recQ    | ATP-dependent DNA helicase                                | -0.94         | 0.05421 | -0.34         | 0.25132 | -1.22         | 0.12391 |
| STM3958         | recQ    | ATP-dependent DNA helicase                                | 0.51          | 0.32229 | -0.65         | 0.13583 | -1.01         | 0.02803 |
| STM3959         | rhtC    | threonine efflux protein                                  | 0.53          | 0.56060 | 0.51          | 0.54688 | -0.43         | 0.42791 |
| STM3959         | rhtC    | threonine efflux protein                                  | -0.02         | 0.97348 | 0.24          | 0.55478 | -2.11         | 0.00852 |
| STM3960         | rthB    | homoserine/homoserine lactone efflux protein              | -0.35         | 0.46766 | -0.19         | 0.58513 | -1.42         | 0.01705 |
| STM3960         | rthB    | homoserine/homoserine lactone efflux protein              | 1.64          | 0.07165 | -0.58         | 0.08198 | 0.02          | 0.98928 |
| STM3961         | pldB    | lysophospholipase L2                                      | -1.08         | 0.04983 | 0.30          | 0.58636 | -0.30         | 0.48125 |
| STM3961         | pldB    | lysophospholipase L2                                      | -1.07         | 0.04588 | -0.28         | 0.34214 | -1.94         | 0.06030 |
| STM3962         | yigL    | putative hydrolase                                        | -0.86         | 0.10271 | -0.68         | 0.02982 | -0.75         | 0.47113 |
| STM3962         | yigL    | putative hydrolase                                        | -1.00         | 0.23662 | -0.38         | 0.27194 | -1.87         | 0.17802 |
| STM3963         | yigM    | putative transport protein                                | -0.52         | 0.46474 | -0.32         | 0.76294 | 0.51          | 0.49646 |
| STM3963         | yigM    | putative transport protein                                | 0.11          | 0.87420 | -0.12         | 0.74912 | -0.57         | 0.34682 |
| STM3964         | metR    | metE/metH regulator                                       | -0.19         | 0.77738 | 1.12          | 0.03198 | -1.57         | 0.09021 |
| STM3964         | metR    | metE/metH regulator                                       | 1.24          | 0.05468 | 0.87          | 0.01115 | -0.12         | 0.78846 |
| STM3965         | metE    | 5-methyltetrahydropteroyltrimethylglutamate--homocysteine | 0.69          | 0.34225 | 0.19          | 0.52451 | -0.81         | 0.13941 |
| STM3965         | metE    | 5-methyltetrahydropteroyltrimethylglutamate--homocysteine | 1.78          | 0.18692 | -0.19         | 0.51353 | 0.40          | 0.63186 |
| STM3966         | STM3966 | putative arylsulfatase regulator                          | 1.15          | 0.23325 | 0.93          | 0.03113 | 0.69          | 0.50244 |
| STM3966         | STM3966 | putative arylsulfatase regulator                          | 1.15          | 0.08901 | 0.65          | 0.15015 | 1.12          | 0.07985 |
| STM3967         | dlhH    | putative diene lactone hydrolase                          | 0.47          | 0.29231 | 1.10          | 0.00590 | 0.62          | 0.48150 |
| STM3967         | dlhH    | putative diene lactone hydrolase                          | 0.88          | 0.09242 | 1.48          | 0.00277 | 0.96          | 0.03876 |
| STM3968         | udp     | uridine phosphorylase                                     | -1.60         | 0.04050 | -2.99         | 0.00006 | -2.36         | 0.00413 |
| STM3968         | udp     | uridine phosphorylase                                     | -0.42         | 0.69155 | -2.80         | 0.00031 | -1.85         | 0.00198 |
| STM3969         | yigN    | putative inner membrane protein                           | -0.67         | 0.22605 | -0.16         | 0.67409 | -0.70         | 0.12558 |
| STM3969         | yigN    | putative inner membrane protein                           | -0.59         | 0.24403 | -0.39         | 0.19676 | -0.49         | 0.23279 |
| STM3970         | ubiE    | ubiquinone/menaquinone biosynthesis methyltransferase     | -1.08         | 0.04057 | -0.32         | 0.27987 | -1.82         | 0.00252 |
| STM3970         | ubiE    | ubiquinone/menaquinone biosynthesis methyltransferase     | -0.07         | 0.91057 | 0.08          | 0.80415 | -1.28         | 0.00732 |
| STM3971         | yigP    | putative inner membrane protein                           | -1.04         | 0.08483 | 0.16          | 0.62572 | -1.64         | 0.00191 |
| STM3971         | yigP    | putative inner membrane protein                           | -0.51         | 0.28373 | 0.13          | 0.67904 | -0.73         | 0.06767 |
| STM3972         | aarF    | putative ubiquinone biosynthesis protein UbiB             | 0.55          | 0.41354 | -0.32         | 0.34570 | -2.04         | 0.00134 |
| STM3972         | aarF    | putative ubiquinone biosynthesis protein UbiB             | 1.45          | 0.06236 | 0.30          | 0.34195 | -0.81         | 0.06952 |
| STM3973         | tatA    | twin arginine translocase protein A                       | -0.28         | 0.53432 | 0.09          | 0.79439 | 0.09          | 0.87700 |
| STM3973         | tatA    | twin arginine translocase protein A                       | 0.67          | 0.21314 | 0.09          | 0.79507 | 0.65          | 0.13425 |

**Table S2.** Genome-wide expression of *Salmonella enterica* serovar Typhimurium inside fibroblasts

|                 |         |                                                           | Intracellular WT<br>24 h p.i.                                                      |         | Intracellular <i>phoP</i><br>24 h p.i.                                              |         | Extracellular WT<br>stationary phase                                                |         |
|-----------------|---------|-----------------------------------------------------------|------------------------------------------------------------------------------------|---------|-------------------------------------------------------------------------------------|---------|-------------------------------------------------------------------------------------|---------|
|                 |         |                                                           | Relative to WT<br>exponential LB                                                   |         | Relative to <i>phoP</i><br>exponential LB                                           |         | Relative to WT<br>exponential LB                                                    |         |
|                 |         |                                                           |  |         |  |         |  |         |
| Systematic name | Gene    | Product                                                   | log2Ratio (M)                                                                      | p value | log2Ratio (M)                                                                       | p value | log2Ratio (M)                                                                       | p value |
| STM3974         | tatB    | sec-independent translocase                               | -1.73                                                                              | 0.02339 | -0.66                                                                               | 0.07189 | -1.86                                                                               | 0.00465 |
| STM3974         | tatB    | sec-independent translocase                               | 0.80                                                                               | 0.17075 | -0.14                                                                               | 0.73593 | -1.26                                                                               | 0.01835 |
| STM3975         | tatC    | Sec-independent protein secretion pathway component       | -0.66                                                                              | 0.25154 | -0.51                                                                               | 0.24706 | -1.37                                                                               | 0.01632 |
| STM3975         | tatC    | Sec-independent protein secretion pathway component       | 0.74                                                                               | 0.32441 | -0.41                                                                               | 0.16350 | -0.50                                                                               | 0.19515 |
| STM3976.S       | yigW    | putative hydrolase                                        | -1.27                                                                              | 0.06140 | 0.14                                                                                | 0.69566 | -1.76                                                                               | 0.01105 |
| STM3976.S       | yigW    | putative hydrolase                                        | -1.25                                                                              | 0.07276 | -0.63                                                                               | 0.04139 | -1.51                                                                               | 0.02207 |
| STM3977         | rfaH    | transcriptional activator RfaH                            | -1.64                                                                              | 0.01882 | -1.07                                                                               | 0.00871 | -0.71                                                                               | 0.16189 |
| STM3977         | rfaH    | transcriptional activator RfaH                            | -1.11                                                                              | 0.10070 | -0.85                                                                               | 0.04398 | -1.28                                                                               | 0.01959 |
| STM3978         | yigC    | putative oxidoreductase                                   | -1.46                                                                              | 0.01667 | -0.95                                                                               | 0.01445 | -2.50                                                                               | 0.00030 |
| STM3978         | yigC    | putative oxidoreductase                                   | -0.25                                                                              | 0.68920 | -0.54                                                                               | 0.07593 | -2.30                                                                               | 0.00428 |
| STM3979         | ubiB    | NAD(P)H-flavin reductase                                  | -1.44                                                                              | 0.07329 | -1.35                                                                               | 0.00192 | -0.87                                                                               | 0.07679 |
| STM3979         | ubiB    | NAD(P)H-flavin reductase                                  | -0.85                                                                              | 0.12130 | -1.40                                                                               | 0.00200 | -1.02                                                                               | 0.03813 |
| STM3981         | STM3981 | putative cytoplasmic protein                              | -0.36                                                                              | 0.49858 | -0.06                                                                               | 0.88945 | -0.22                                                                               | 0.64867 |
| STM3981         | STM3981 | putative cytoplasmic protein                              | 1.02                                                                               | 0.06085 | 0.44                                                                                | 0.13343 | 0.47                                                                                | 0.25343 |
| STM3982         | fadA    | acetyl-CoA acetyltransferase                              | -0.78                                                                              | 0.15154 | 1.54                                                                                | 0.01422 | 0.61                                                                                | 0.20106 |
| STM3982         | fadA    | acetyl-CoA acetyltransferase                              | 0.27                                                                               | 0.68802 | 0.77                                                                                | 0.03962 | 0.43                                                                                | 0.42162 |
| STM3983         | fadB    | 3-hydroxyacyl-CoA dehydrogenase                           | -0.48                                                                              | 0.51786 | 1.08                                                                                | 0.02173 | -0.33                                                                               | 0.45010 |
| STM3983         | fadB    | 3-hydroxyacyl-CoA dehydrogenase                           | 0.53                                                                               | 0.35194 | 1.09                                                                                | 0.00445 | 0.64                                                                                | 0.26245 |
| STM3984         | pepQ    | proline dipeptidase                                       | -0.57                                                                              | 0.36015 | -0.32                                                                               | 0.25554 | -0.07                                                                               | 0.86623 |
| STM3984         | pepQ    | proline dipeptidase                                       | 0.16                                                                               | 0.75196 | -0.59                                                                               | 0.09504 | 0.97                                                                                | 0.03082 |
| STM3985         | yigZ    | putative cytoplasmic protein                              | -1.37                                                                              | 0.02087 | -0.91                                                                               | 0.00791 | -0.76                                                                               | 0.05003 |
| STM3985         | yigZ    | putative cytoplasmic protein                              | -0.76                                                                              | 0.10556 | -0.78                                                                               | 0.02962 | -0.14                                                                               | 0.70371 |
| STM3986         | trkH    | potassium transport protein                               | -1.27                                                                              | 0.05571 | -0.23                                                                               | 0.55435 | 0.94                                                                                | 0.02730 |
| STM3986         | trkH    | potassium transport protein                               | 0.16                                                                               | 0.86483 | -0.19                                                                               | 0.49015 | 0.49                                                                                | 0.32226 |
| STM3987         | hemG    | protoporphyrin oxidase                                    | 0.06                                                                               | 0.88427 | 0.71                                                                                | 0.06032 | 0.82                                                                                | 0.03858 |
| STM3987         | hemG    | protoporphyrin oxidase                                    | 0.56                                                                               | 0.37031 | 0.41                                                                                | 0.26311 | 1.75                                                                                | 0.00304 |
| STM3988         | rrsA    | STM3988                                                   | -2.05                                                                              | 0.04832 | -0.16                                                                               | 0.68667 | 0.00                                                                                | 0.99426 |
| STM3988         | rrsA    | STM3988                                                   | -2.12                                                                              | 0.06312 | 0.25                                                                                | 0.55810 | -0.52                                                                               | 0.17551 |
| STM3989         | ileT    | STM3989                                                   | 1.18                                                                               | 0.05779 | 0.48                                                                                | 0.17115 | 1.16                                                                                | 0.00899 |
| STM3989         | ileT    | STM3989                                                   | 1.20                                                                               | 0.10314 | 0.10                                                                                | 0.77598 | 1.21                                                                                | 0.00967 |
| STM3990         | alaT    | STM3990                                                   | 1.41                                                                               | 0.03789 | 0.71                                                                                | 0.03235 | 0.45                                                                                | 0.19319 |
| STM3990         | alaT    | STM3990                                                   | 1.67                                                                               | 0.01305 | 0.86                                                                                | 0.01423 | 0.25                                                                                | 0.49040 |
| STM3991         | rrlA    | STM3991                                                   | -2.25                                                                              | 0.01765 | 0.04                                                                                | 0.94642 | -0.83                                                                               | 0.10546 |
| STM3991         | rrlA    | STM3991                                                   | -2.94                                                                              | 0.01193 | -0.04                                                                               | 0.95207 | -1.95                                                                               | 0.00902 |
| STM3992         | rrfA    | STM3992                                                   | 0.35                                                                               | 0.59927 | 0.00                                                                                | 0.99252 | 0.28                                                                                | 0.64647 |
| STM3992         | rrfA    | STM3992                                                   | 1.46                                                                               | 0.02765 | 0.34                                                                                | 0.53369 | 0.44                                                                                | 0.23593 |
| STM3993         | mobB    | molybdopterin-guanine dinucleotide biosynthesis protein B | -0.93                                                                              | 0.06399 | -0.23                                                                               | 0.46292 | 1.32                                                                                | 0.00600 |
| STM3993         | mobB    | molybdopterin-guanine dinucleotide biosynthesis protein B | -0.84                                                                              | 0.21626 | -0.03                                                                               | 0.94003 | 1.68                                                                                | 0.00304 |
| STM3994         | mobA    | molybdopterin-guanine dinucleotide biosynthesis protein A | -1.25                                                                              | 0.12921 | -0.28                                                                               | 0.45318 | 1.22                                                                                | 0.03331 |
| STM3994         | mobA    | molybdopterin-guanine dinucleotide biosynthesis protein A | -0.40                                                                              | 0.40310 | -0.25                                                                               | 0.54693 | 1.21                                                                                | 0.01266 |
| STM3995         | yihD    | putative cytoplasmic protein                              | -1.27                                                                              | 0.09313 | -1.02                                                                               | 0.01654 | 0.20                                                                                | 0.61485 |
| STM3995         | yihD    | putative cytoplasmic protein                              | -0.03                                                                              | 0.95887 | -0.99                                                                               | 0.00622 | 0.55                                                                                | 0.12619 |
| STM3996         | yihE    | putative type II homoserine kinase                        | 1.79                                                                               | 0.06196 | -0.25                                                                               | 0.42753 | 0.12                                                                                | 0.89294 |
| STM3996         | yihE    | putative type II homoserine kinase                        | 2.32                                                                               | 0.24165 | -0.47                                                                               | 0.20970 | 0.89                                                                                | 0.62768 |
| STM3997         | dsbA    | periplasmic protein disulfide isomerase I                 | -1.95                                                                              | 0.02729 | -0.42                                                                               | 0.16845 | -0.62                                                                               | 0.25030 |
| STM3997         | dsbA    | periplasmic protein disulfide isomerase I                 | -0.76                                                                              | 0.27015 | -0.27                                                                               | 0.38604 | -0.97                                                                               | 0.01856 |
| STM3998         | yihG    | putative endonuclease                                     | -1.62                                                                              | 0.04342 | -0.51                                                                               | 0.15812 | -1.76                                                                               | 0.00280 |
| STM3998         | yihG    | putative endonuclease                                     | -1.32                                                                              | 0.03179 | -0.58                                                                               | 0.06667 | -1.13                                                                               | 0.02343 |
| STM3999         | polA    | DNA polymerase I                                          | -1.15                                                                              | 0.04845 | -0.33                                                                               | 0.37800 | -0.91                                                                               | 0.04195 |
| STM3999         | polA    | DNA polymerase I                                          | 0.24                                                                               | 0.79237 | -0.64                                                                               | 0.03798 | -0.44                                                                               | 0.25218 |
| STM4000         | spf     | STM4000                                                   | -1.34                                                                              | 0.06267 | -0.73                                                                               | 0.02260 | -0.56                                                                               | 0.23647 |
| STM4000         | spf     | STM4000                                                   | -1.15                                                                              | 0.35912 | -1.59                                                                               | 0.00085 | -0.45                                                                               | 0.26782 |
| STM4001         | yihA    | GTP-binding protein                                       | -1.42                                                                              | 0.02309 | 0.54                                                                                | 0.38599 | -0.44                                                                               | 0.33178 |
| STM4001         | yihA    | GTP-binding protein                                       | -1.52                                                                              | 0.05036 | -0.41                                                                               | 0.15825 | -0.67                                                                               | 0.22460 |
| STM4003         | yihI    | hypothetical protein STM4003                              | -1.08                                                                              | 0.04501 | -1.25                                                                               | 0.00505 | -0.21                                                                               | 0.58267 |
| STM4003         | yihI    | hypothetical protein STM4003                              | -0.49                                                                              | 0.27849 | -1.05                                                                               | 0.00638 | 0.15                                                                                | 0.71025 |
| STM4004         | hemN    | coproporphyrinogen III oxidase                            | -1.15                                                                              | 0.04692 | -1.12                                                                               | 0.00596 | -1.51                                                                               | 0.00372 |
| STM4004         | hemN    | coproporphyrinogen III oxidase                            | -1.34                                                                              | 0.28131 | -0.63                                                                               | 0.05044 | -1.71                                                                               | 0.02700 |
| STM4005         | glnG    | response regulator                                        | -0.44                                                                              | 0.45046 | -1.42                                                                               | 0.00617 | -0.40                                                                               | 0.52656 |
| STM4005         | glnG    | response regulator                                        | 0.06                                                                               | 0.94866 | -0.83                                                                               | 0.04176 | -0.75                                                                               | 0.30355 |
| STM4006         | glnL    | sensor kinase                                             | -1.27                                                                              | 0.02468 | -1.99                                                                               | 0.00067 | -1.87                                                                               | 0.03443 |
| STM4006         | glnL    | sensor kinase                                             | -0.46                                                                              | 0.34561 | -2.05                                                                               | 0.00075 | -1.29                                                                               | 0.01945 |
| STM4007         | glnA    | glutamine synthetase                                      | -1.28                                                                              | 0.02828 | -0.45                                                                               | 0.11340 | -3.45                                                                               | 0.00742 |
| STM4007         | glnA    | glutamine synthetase                                      | -0.90                                                                              | 0.07165 | -0.28                                                                               | 0.36719 | -4.71                                                                               | 0.00005 |
| STM4009         | typA    | GTP-binding elongation factor family protein              | -1.17                                                                              | 0.07746 | -0.30                                                                               | 0.37315 | -0.79                                                                               | 0.08578 |
| STM4009         | typA    | GTP-binding elongation factor family protein              | -0.68                                                                              | 0.21612 | -0.14                                                                               | 0.68034 | -0.98                                                                               | 0.09006 |
| STM4010         | STM4010 | putative hydrolase                                        | -1.62                                                                              | 0.01515 | -0.35                                                                               | 0.31644 | -1.15                                                                               | 0.07556 |
| STM4010         | STM4010 | putative hydrolase                                        | -1.75                                                                              | 0.09713 | -0.72                                                                               | 0.07250 | -1.19                                                                               | 0.01184 |
| STM4011         | STM4011 | putative inner membrane protein                           | -1.51                                                                              | 0.07626 | -0.96                                                                               | 0.01132 | -1.78                                                                               | 0.00777 |
| STM4011         | STM4011 | putative inner membrane protein                           | -0.61                                                                              | 0.21459 | -1.02                                                                               | 0.00619 | -1.02                                                                               | 0.03509 |

**Table S2.** Genome-wide expression of *Salmonella enterica* serovar Typhimurium inside fibroblasts

| Systematic name | Gene       | Product                                                | log2Ratio (M) | p value | log2Ratio (M) | p value | log2Ratio (M) | p value |
|-----------------|------------|--------------------------------------------------------|---------------|---------|---------------|---------|---------------|---------|
| STM4012         | STM4012    | coproporphyrinogen III oxidase                         | -0.84         | 0.09801 | -0.61         | 0.04301 | -0.03         | 0.94719 |
| STM4012         | STM4012    | coproporphyrinogen III oxidase                         | 1.51          | 0.02872 | -0.34         | 0.50397 | 0.83          | 0.23023 |
| STM4013,S       | STM4013,S  | putative membrane-associated metal-dependent hydrolase | -0.26         | 0.72446 | -0.45         | 0.49389 | 0.35          | 0.44786 |
| STM4013,S       | STM4013,S  | putative membrane-associated metal-dependent hydrolase | 0.31          | 0.51992 | -2.23         | 0.00013 | 0.40          | 0.42189 |
| STM4014         | STM4014    | putative periplasmic protein                           | 5.83          | 0.02347 | 4.51          | 0.00010 | 4.31          | 0.02752 |
| STM4014         | STM4014    | putative periplasmic protein                           | 6.92          | 0.01085 | 2.60          | 0.00147 | 4.65          | 0.00152 |
| STM4015         | STM4015    | putative cytoplasmic protein                           | -1.09         | 0.07354 | 0.59          | 0.08305 | -0.11         | 0.87922 |
| STM4015         | STM4015    | putative cytoplasmic protein                           | -0.44         | 0.58682 | -0.74         | 0.05634 | 0.63          | 0.22380 |
| STM4016         | yshA       | putative outer membrane protein                        | 1.59          | 0.22022 | -0.86         | 0.06592 | 1.55          | 0.05455 |
| STM4016         | yshA       | putative outer membrane protein                        | -0.52         | 0.58781 | -1.41         | 0.00591 | 0.43          | 0.40102 |
| STM4017         | yihO       | putative GPH family transport protein                  | 0.26          | 0.59615 | -0.45         | 0.58946 | 1.30          | 0.01817 |
| STM4017         | yihO       | putative GPH family transport protein                  | 1.37          | 0.18880 | -0.95         | 0.03726 | 0.38          | 0.45667 |
| STM4018         | yihP       | putative GPH family transport protein                  | 1.43          | 0.10004 | 1.54          | 0.00195 | 1.82          | 0.01004 |
| STM4018         | yihP       | putative GPH family transport protein                  | 2.18          | 0.01592 | 1.16          | 0.15953 | 2.52          | 0.00166 |
| STM4019         | yihQ       | putative alpha-xylosidase                              | 0.73          | 0.32129 | 0.62          | 0.20321 | 0.28          | 0.54516 |
| STM4019         | yihQ       | putative alpha-xylosidase                              | 0.59          | 0.16511 | -0.39         | 0.31014 | 1.07          | 0.15764 |
| STM4020,S       | yihR       | putative aldose-1-epimerase                            | -0.13         | 0.76966 | -0.58         | 0.11501 | -0.41         | 0.46330 |
| STM4020,S       | yihR       | putative aldose-1-epimerase                            | 0.04          | 0.94061 | -0.15         | 0.77871 | -0.64         | 0.43580 |
| STM4021         | yihS       | putative isomerase                                     | -0.74         | 0.20774 | -0.13         | 0.84552 | 0.79          | 0.10436 |
| STM4021         | yihS       | putative isomerase                                     | 0.27          | 0.53332 | -1.13         | 0.01191 | -0.24         | 0.54752 |
| STM4022         | yihT       | putative aldolase                                      | -0.83         | 0.10358 | 0.19          | 0.67976 | 0.31          | 0.75314 |
| STM4022         | yihT       | putative aldolase                                      | 0.17          | 0.71798 | -0.71         | 0.18193 | -0.16         | 0.75671 |
| STM4023         | yihU       | putative oxidoreductase                                | -0.03         | 0.96450 | -1.54         | 0.03813 | -0.50         | 0.69334 |
| STM4023         | yihU       | putative oxidoreductase                                | 0.46          | 0.71390 | -0.80         | 0.05216 | 0.15          | 0.89697 |
| STM4024,S       | yihV       | putative sugar kinase                                  | -0.25         | 0.68769 | -0.70         | 0.03533 | -0.42         | 0.53854 |
| STM4024,S       | yihV       | putative sugar kinase                                  | 0.07          | 0.91699 | -1.13         | 0.03252 | -0.55         | 0.77559 |
| STM4025         | yihW       | putative glycerol-3-phosphate regulon repressor        | -0.47         | 0.43401 | -0.66         | 0.09379 | -0.24         | 0.56691 |
| STM4025         | yihW       | putative glycerol-3-phosphate regulon repressor        | -0.33         | 0.55995 | -0.37         | 0.17436 | 0.76          | 0.28271 |
| STM4026         | yihX       | phosphatase                                            | -1.06         | 0.20924 | -0.94         | 0.04699 | -0.38         | 0.40873 |
| STM4026         | yihX       | phosphatase                                            | -0.28         | 0.58838 | -0.40         | 0.19431 | 0.19          | 0.59501 |
| STM4027         | rbn        | ribonuclease BN                                        | -0.29         | 0.53542 | -0.64         | 0.05651 | -1.14         | 0.09484 |
| STM4027         | rbn        | ribonuclease BN                                        | 0.45          | 0.52695 | -0.67         | 0.05172 | -0.44         | 0.32665 |
| STM4028         | yihZ       | D-tyrosyl-tRNA deacylase                               | -0.74         | 0.41626 | -0.75         | 0.04802 | -1.50         | 0.00720 |
| STM4028         | yihZ       | D-tyrosyl-tRNA deacylase                               | 0.16          | 0.75541 | -1.01         | 0.02376 | -0.69         | 0.08498 |
| STM4029         | yiiD       | putative acetyltransferase                             | 0.27          | 0.71508 | 0.51          | 0.15834 | 0.12          | 0.74768 |
| STM4029         | yiiD       | putative acetyltransferase                             | 1.27          | 0.06815 | 0.95          | 0.01450 | 1.33          | 0.05815 |
| STM4030,S       | STM4030,S  | putative cytoplasmic protein                           | 1.16          | 0.03562 | 2.01          | 0.00034 | 0.06          | 0.87641 |
| STM4030,S       | STM4030,S  | putative cytoplasmic protein                           | 1.26          | 0.03293 | 1.86          | 0.00213 | 1.04          | 0.04022 |
| STM4031         | STM4031    | putative cytoplasmic protein                           | 0.98          | 0.29260 | 2.50          | 0.00033 | 0.15          | 0.73863 |
| STM4031         | STM4031    | putative cytoplasmic protein                           | 2.58          | 0.00753 | 2.91          | 0.00014 | 0.45          | 0.24534 |
| STM4032         | STM4032    | putative acetyl esterase                               | -1.09         | 0.25320 | -0.35         | 0.27740 | -0.22         | 0.64230 |
| STM4032         | STM4032    | putative acetyl esterase                               | 1.13          | 0.37126 | -0.01         | 0.97647 | 0.85          | 0.09665 |
| STM4032,2N      | STM4032,2N | hypothetical protein STM4032,2N                        | 0.74          | 0.12508 | 3.00          | 0.00503 | 0.97          | 0.09899 |
| STM4032,2N      | STM4032,2N | hypothetical protein STM4032,2N                        | 1.25          | 0.06553 | 0.82          | 0.03442 | 1.50          | 0.00523 |
| STM4033         | STM4033    | putative regulatory protein                            | -0.60         | 0.25777 | -0.23         | 0.49843 | -1.03         | 0.07300 |
| STM4033         | STM4033    | putative regulatory protein                            | 0.27          | 0.67110 | -0.19         | 0.53694 | -0.62         | 0.25100 |
| STM4034         | fdhE       | formate dehydrogenase accessory protein FdhE           | 1.43          | 0.23254 | 0.32          | 0.26915 | -0.92         | 0.07806 |
| STM4034         | fdhE       | formate dehydrogenase accessory protein FdhE           | 0.76          | 0.25707 | 0.41          | 0.17242 | -0.60         | 0.11769 |
| STM4035         | fdol       | formate dehydrogenase-O gamma subunit                  | -0.45         | 0.39109 | -1.39         | 0.00163 | -1.65         | 0.01882 |
| STM4035         | fdol       | formate dehydrogenase-O gamma subunit                  | 0.43          | 0.38774 | -0.76         | 0.03652 | -1.27         | 0.02233 |
| STM4036         | fdoH       | formate dehydrogenase-O beta subunit                   | -0.81         | 0.61242 | -2.33         | 0.00032 | -0.93         | 0.20093 |
| STM4036         | fdoH       | formate dehydrogenase-O beta subunit                   | 2.35          | 0.00720 | -3.04         | 0.00011 | 0.06          | 0.94140 |
| STM4037         | fdoG       | formate dehydrogenase alpha subunit                    | -3.06         | 0.00942 | -2.42         | 0.00023 | -2.62         | 0.00037 |
| STM4037         | fdoG       | formate dehydrogenase alpha subunit                    | -2.23         | 0.01479 | -1.38         | 0.12073 | -1.97         | 0.00683 |
| STM4038         | fdhD       | formate dehydrogenase accessory protein                | 0.30          | 0.71888 | -2.12         | 0.00130 | -1.50         | 0.07443 |
| STM4038         | fdhD       | formate dehydrogenase accessory protein                | -0.94         | 0.68827 | -1.83         | 0.00235 | -2.27         | 0.08782 |
| STM4039         | STM4039    | putative inner membrane lipoprotein                    | -0.82         | 0.11505 | -0.33         | 0.25566 | -0.67         | 0.13021 |
| STM4039         | STM4039    | putative inner membrane lipoprotein                    | 0.80          | 0.50324 | 0.26          | 0.61191 | -0.55         | 0.36837 |
| STM4040         | yiiG       | putative cytoplasmic protein                           | -0.39         | 0.57800 | -0.09         | 0.91681 | 0.23          | 0.58171 |
| STM4040         | yiiG       | putative cytoplasmic protein                           | 0.52          | 0.22243 | -0.24         | 0.70774 | 1.08          | 0.01416 |
| STM4041         | STM4041    | putative inner membrane protein                        | -1.39         | 0.04742 | -0.60         | 0.41640 | -1.14         | 0.03208 |
| STM4041         | STM4041    | putative inner membrane protein                        | -0.11         | 0.81924 | -0.82         | 0.05080 | -0.77         | 0.20167 |
| STM4042         | STM4042    | putative branched-chain amino acid permease            | 0.62          | 0.35370 | -0.10         | 0.76452 | -1.23         | 0.01032 |
| STM4042         | STM4042    | putative branched-chain amino acid permease            | 0.32          | 0.45618 | 0.20          | 0.57714 | -0.13         | 0.82800 |
| STM4042A        | STM4042A   | hypothetical protein STM4042A                          | -1.12         | 0.13520 | -0.46         | 0.35851 | -0.65         | 0.25749 |
| STM4042A        | STM4042A   | hypothetical protein STM4042A                          | -0.09         | 0.88349 | 0.33          | 0.22727 | -0.70         | 0.12834 |
| STM4043         | yiiL       | putative cytoplasmic protein                           | -0.88         | 0.17538 | -0.19         | 0.69497 | 0.26          | 0.63548 |
| STM4043         | yiiL       | putative cytoplasmic protein                           | -1.99         | 0.03518 | -0.18         | 0.57362 | -2.07         | 0.00150 |
| STM4044         | STM4044    | putative alcohol dehydrogenase                         | 0.54          | 0.55868 | -0.46         | 0.26237 | 0.51          | 0.55918 |
| STM4044         | STM4044    | putative alcohol dehydrogenase                         | 1.40          | 0.02424 | 0.27          | 0.42002 | 0.31          | 0.40425 |

**Table S2.** Genome-wide expression of *Salmonella enterica* serovar Typhimurium inside fibroblasts

Intracellular WT 24 h p.i.      Intracellular *phoP* 24 h p.i.      Extracellular WT stationary phase

Relative to WT exponential LB      Relative to *phoP* exponential LB      Relative to WT exponential LB



| Systematic name | Gene    | Product                                            | log2Ratio (M) | p value | log2Ratio (M) | p value | log2Ratio (M) | p value |
|-----------------|---------|----------------------------------------------------|---------------|---------|---------------|---------|---------------|---------|
| STM4045         | rhaD    | rhamnulose-1-phosphate aldolase                    | -1.01         | 0.17542 | -0.04         | 0.89492 | -0.37         | 0.52036 |
| STM4045         | rhaD    | rhamnulose-1-phosphate aldolase                    | 0.41          | 0.48015 | -0.43         | 0.47304 | -0.31         | 0.39788 |
| STM4046         | rhaA    | L-rhamnose isomerase                               | -0.04         | 0.93940 | -0.60         | 0.31869 | -0.14         | 0.79443 |
| STM4046         | rhaA    | L-rhamnose isomerase                               | 1.38          | 0.45414 | 0.09          | 0.92902 | 0.49          | 0.43067 |
| STM4047         | rhaB    | rhamnulokinase                                     | -0.49         | 0.28373 | 0.73          | 0.03800 | -0.46         | 0.26256 |
| STM4047         | rhaB    | rhamnulokinase                                     | 0.99          | 0.05606 | -0.93         | 0.04103 | 1.86          | 0.22418 |
| STM4048         | rhaS    | L-rhamnose operon regulatory protein               | 0.03          | 0.97293 | -0.74         | 0.06553 | -0.29         | 0.53173 |
| STM4048         | rhaS    | L-rhamnose operon regulatory protein               | 2.02          | 0.01171 | -0.52         | 0.31476 | 0.39          | 0.52048 |
| STM4049         | rhaR    | rhaRS operon regulatory protein                    | 0.36          | 0.47883 | 0.29          | 0.48492 | 0.92          | 0.12070 |
| STM4049         | rhaR    | rhaRS operon regulatory protein                    | 1.07          | 0.15459 | 0.58          | 0.08734 | 0.24          | 0.66786 |
| STM4050         | rhaT    | L-rhamnose/H+ symporter protein                    | -0.72         | 0.39262 | -0.07         | 0.89101 | -0.85         | 0.16042 |
| STM4050         | rhaT    | L-rhamnose/H+ symporter protein                    | 0.89          | 0.21547 | 0.07          | 0.89754 | 0.30          | 0.49025 |
| STM4051         | STM4051 | putative outer membrane protein                    | -0.49         | 0.29163 | 0.35          | 0.59493 | -0.15         | 0.74693 |
| STM4051         | STM4051 | putative outer membrane protein                    | 0.38          | 0.45198 | 0.05          | 0.93932 | 1.72          | 0.10947 |
| STM4052         | STM4052 | putative C4-dicarboxylate transport system         | -0.40         | 0.68170 | 0.47          | 0.52674 | 0.25          | 0.57818 |
| STM4052         | STM4052 | putative C4-dicarboxylate transport system         | 0.84          | 0.40315 | -1.04         | 0.04612 | -1.26         | 0.10410 |
| STM4053         | STM4053 | putative C4-dicarboxylate transport system         | 0.37          | 0.42988 | 0.29          | 0.32828 | 0.84          | 0.10552 |
| STM4053         | STM4053 | putative C4-dicarboxylate transport system         | 0.46          | 0.53577 | -1.38         | 0.00448 | 0.09          | 0.85047 |
| STM4054         | STM4054 | putative periplasmic dicarboxylate-binding protein | -0.55         | 0.20566 | -0.71         | 0.05932 | 0.07          | 0.90503 |
| STM4054         | STM4054 | putative periplasmic dicarboxylate-binding protein | 0.26          | 0.59741 | -1.63         | 0.00341 | -0.10         | 0.82029 |
| STM4055         | sodA    | superoxide dismutase                               | -3.04         | 0.01305 | -1.42         | 0.00168 | -0.08         | 0.84039 |
| STM4055         | sodA    | superoxide dismutase                               | -1.93         | 0.02552 | -1.46         | 0.00358 | -0.18         | 0.61424 |
| STM4056,S       | yiiM    | putative cytoplasmic protein                       | -1.05         | 0.06500 | -0.33         | 0.25839 | -0.09         | 0.81963 |
| STM4056,S       | yiiM    | putative cytoplasmic protein                       | -0.44         | 0.35495 | -0.58         | 0.06780 | -0.16         | 0.69549 |
| STM4057         | STM4057 | putative inner membrane protein                    | -1.46         | 0.03991 | -0.70         | 0.05328 | -1.38         | 0.01526 |
| STM4057         | STM4057 | putative inner membrane protein                    | -0.17         | 0.83693 | -0.64         | 0.18856 | 0.02          | 0.97405 |
| STM4058         | cpxA    | two-component sensor protein                       | -1.27         | 0.04517 | -0.22         | 0.58486 | -1.77         | 0.00515 |
| STM4058         | cpxA    | two-component sensor protein                       | 0.25          | 0.70219 | -0.03         | 0.93731 | -0.64         | 0.11757 |
| STM4059         | cpxR    | response regulator                                 | -1.66         | 0.01551 | 0.19          | 0.62673 | -1.77         | 0.00112 |
| STM4059         | cpxR    | response regulator                                 | -1.18         | 0.06677 | 0.42          | 0.28241 | -1.42         | 0.01622 |
| STM4060         | cpxP    | periplasmic repressor                              | 1.58          | 0.03329 | 4.60          | 0.00003 | 4.01          | 0.00005 |
| STM4060         | cpxP    | periplasmic repressor                              | 2.67          | 0.00757 | 4.36          | 0.00002 | 4.64          | 0.00002 |
| STM4061         | fieF    | ferrous iron efflux protein F                      | -0.58         | 0.20939 | 0.06          | 0.88334 | -1.11         | 0.01105 |
| STM4061         | fieF    | ferrous iron efflux protein F                      | -0.39         | 0.33295 | 0.58          | 0.06380 | -0.57         | 0.15345 |
| STM4062         | pfkA    | 6-phosphofructokinase                              | -0.87         | 0.13734 | 0.56          | 0.09313 | -0.27         | 0.54533 |
| STM4062         | pfkA    | 6-phosphofructokinase                              | 0.28          | 0.51135 | 0.09          | 0.85933 | 0.62          | 0.12974 |
| STM4063         | sbp     | sulfate transport protein                          | 1.12          | 0.16023 | 0.46          | 0.26241 | 0.31          | 0.39572 |
| STM4063         | sbp     | sulfate transport protein                          | -0.46         | 0.43083 | -0.88         | 0.10516 | -0.43         | 0.34931 |
| STM4064         | ushB    | CDP-diacylglycerol pyrophosphatase                 | -1.24         | 0.07059 | -0.78         | 0.02935 | -2.85         | 0.00086 |
| STM4064         | ushB    | CDP-diacylglycerol pyrophosphatase                 | -1.29         | 0.05707 | -0.45         | 0.21299 | -4.82         | 0.00021 |
| STM4065         | STM4065 | putative Na+/galactoside symporter                 | -0.75         | 0.19941 | -1.33         | 0.01260 | -1.22         | 0.10342 |
| STM4065         | STM4065 | putative Na+/galactoside symporter                 | 0.03          | 0.95456 | -0.69         | 0.05415 | 0.58          | 0.38668 |
| STM4066         | STM4066 | aminoimidazole riboside kinase                     | -0.82         | 0.12861 | -0.24         | 0.53919 | -0.65         | 0.28054 |
| STM4066         | STM4066 | aminoimidazole riboside kinase                     | 0.10          | 0.91824 | -0.78         | 0.07882 | -0.68         | 0.23094 |
| STM4067         | STM4067 | putative ADP-ribosylglycohydrolase                 | -2.17         | 0.03218 | -0.64         | 0.05000 | -1.55         | 0.00725 |
| STM4067         | STM4067 | putative ADP-ribosylglycohydrolase                 | -1.08         | 0.05100 | -0.92         | 0.01562 | -1.83         | 0.00214 |
| STM4068         | STM4068 | putative regulatory protein                        | -1.36         | 0.02480 | -1.09         | 0.01594 | -1.28         | 0.00711 |
| STM4068         | STM4068 | putative regulatory protein                        | -0.92         | 0.20966 | -0.63         | 0.07701 | -0.75         | 0.19553 |
| STM4069         | STM4069 | putative periplasmic protein                       | -0.13         | 0.78098 | 0.16          | 0.66130 | -0.68         | 0.12435 |
| STM4069         | STM4069 | putative periplasmic protein                       | -0.41         | 0.65156 | -0.91         | 0.05282 | -0.83         | 0.28045 |
| STM4070         | STM4070 | putative cytoplasmic protein                       | -0.51         | 0.35856 | 0.55          | 0.09869 | -1.10         | 0.18300 |
| STM4070         | STM4070 | putative cytoplasmic protein                       | 0.38          | 0.51327 | 0.63          | 0.10331 | -0.85         | 0.23194 |
| STM4071         | STM4071 | putative mannose-6-phosphate isomerase             | 0.28          | 0.68170 | -0.59         | 0.13300 | -1.37         | 0.01062 |
| STM4071         | STM4071 | putative mannose-6-phosphate isomerase             | 1.66          | 0.05591 | -0.09         | 0.88764 | 0.75          | 0.13643 |
| STM4072         | ydeV    | putative sugar kinase                              | 0.02          | 0.97602 | 1.44          | 0.00431 | -0.14         | 0.75671 |
| STM4072         | ydeV    | putative sugar kinase                              | 2.22          | 0.02748 | 1.06          | 0.02698 | 2.31          | 0.00073 |
| STM4073         | ydeW    | putative transcriptional repressor                 | -0.26         | 0.69112 | 0.53          | 0.11219 | 0.60          | 0.26871 |
| STM4073         | ydeW    | putative transcriptional repressor                 | -0.20         | 0.74986 | 1.28          | 0.03672 | 0.24          | 0.67630 |
| STM4074         | ego     | putative ABC-type aldose transport system ATPase   | -0.79         | 0.17299 | 0.10          | 0.80248 | -0.12         | 0.86113 |
| STM4074         | ego     | putative ABC-type aldose transport system ATPase   | -0.17         | 0.84070 | -0.05         | 0.88990 | -1.22         | 0.23194 |
| STM4075         | ydeY    | putative sugar transport protein                   | 2.41          | 0.01578 | 0.12          | 0.77446 | 1.49          | 0.01597 |
| STM4075         | ydeY    | putative sugar transport protein                   | 3.51          | 0.00541 | 0.53          | 0.41061 | 3.62          | 0.00045 |
| STM4076         | ydeZ    | putative sugar transport protein                   | 0.33          | 0.69292 | 2.27          | 0.00067 | 2.48          | 0.00634 |
| STM4076         | ydeZ    | putative sugar transport protein                   | 0.75          | 0.22906 | 1.96          | 0.00427 | 1.92          | 0.01640 |
| STM4077         | yneA    | putative sugar transport protein                   | -0.60         | 0.37789 | 1.60          | 0.00131 | 1.05          | 0.18165 |
| STM4077         | yneA    | putative sugar transport protein                   | 0.91          | 0.09243 | 2.04          | 0.00019 | 1.53          | 0.00453 |
| STM4078         | yneB    | hypothetical protein STM4078                       | -0.38         | 0.53400 | 0.99          | 0.00925 | -0.61         | 0.15222 |
| STM4078         | yneB    | hypothetical protein STM4078                       | 0.34          | 0.73633 | 0.81          | 0.02073 | 0.61          | 0.11611 |
| STM4079,S       | yneC    | putative inner membrane protein                    | -1.38         | 0.06919 | 0.98          | 0.00972 | -0.18         | 0.70360 |
| STM4079,S       | yneC    | putative inner membrane protein                    | -0.37         | 0.68379 | 0.39          | 0.18503 | -0.28         | 0.52152 |

**Table S2.** Genome-wide expression of *Salmonella enterica* serovar Typhimurium inside fibroblasts

|                                                                                                          |         |                                                           | Intracellular WT<br>24 h p.i.                                                      |         | Intracellular <i>phoP</i><br>24 h p.i.                                              |         | Extracellular WT<br>stationary phase                                                |         |
|----------------------------------------------------------------------------------------------------------|---------|-----------------------------------------------------------|------------------------------------------------------------------------------------|---------|-------------------------------------------------------------------------------------|---------|-------------------------------------------------------------------------------------|---------|
| Table S2. Genome-wide expression of <i>Salmonella enterica</i> serovar<br>Typhimurium inside fibroblasts |         |                                                           | Relative to WT<br>exponential LB                                                   |         | Relative to <i>phoP</i><br>exponential LB                                           |         | Relative to WT<br>exponential LB                                                    |         |
|                                                                                                          |         |                                                           | 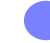 |         | 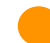 |         | 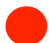 |         |
| Systematic<br>name                                                                                       | Gene    | Product                                                   | log2Ratio<br>(M)                                                                   | p value | log2Ratio<br>(M)                                                                    | p value | log2Ratio<br>(M)                                                                    | p value |
| STM4080                                                                                                  | STM4080 | ribulose-phosphate 3-epimerase                            | -1.51                                                                              | 0.03538 | -0.54                                                                               | 0.16350 | -2.33                                                                               | 0.00164 |
| STM4080                                                                                                  | STM4080 | ribulose-phosphate 3-epimerase                            | -1.24                                                                              | 0.09721 | -0.21                                                                               | 0.52151 | -2.27                                                                               | 0.00126 |
| STM4081                                                                                                  | tpiA    | triosephosphate isomerase                                 | -3.12                                                                              | 0.01336 | 0.07                                                                                | 0.84582 | -1.24                                                                               | 0.02390 |
| STM4081                                                                                                  | tpiA    | triosephosphate isomerase                                 | -1.98                                                                              | 0.02010 | 0.61                                                                                | 0.07987 | -1.48                                                                               | 0.00694 |
| STM4082                                                                                                  | yiiQ    | putative periplasmic protein                              | -2.25                                                                              | 0.00727 | -1.48                                                                               | 0.00248 | -2.49                                                                               | 0.00041 |
| STM4082                                                                                                  | yiiQ    | putative periplasmic protein                              | -1.29                                                                              | 0.12619 | -1.12                                                                               | 0.00427 | -2.64                                                                               | 0.00896 |
| STM4083                                                                                                  | yiiR    | putative inner membrane protein                           | 0.32                                                                               | 0.54012 | -0.24                                                                               | 0.38734 | 0.41                                                                                | 0.40607 |
| STM4083                                                                                                  | yiiR    | putative inner membrane protein                           | 1.10                                                                               | 0.08266 | -0.14                                                                               | 0.65714 | 1.27                                                                                | 0.02811 |
| STM4084                                                                                                  | fpr     | ferredoxin-NADP reductase                                 | 2.31                                                                               | 0.01044 | -0.05                                                                               | 0.95273 | 1.18                                                                                | 0.03112 |
| STM4084                                                                                                  | fpr     | ferredoxin-NADP reductase                                 | 3.16                                                                               | 0.10971 | -0.66                                                                               | 0.08486 | 1.00                                                                                | 0.02386 |
| STM4085                                                                                                  | glpX    | fructose 1,6-bisphosphatase II                            | -2.38                                                                              | 0.01319 | -0.46                                                                               | 0.11724 | -1.88                                                                               | 0.00237 |
| STM4085                                                                                                  | glpX    | fructose 1,6-bisphosphatase II                            | -1.05                                                                              | 0.13556 | -0.18                                                                               | 0.63676 | -1.99                                                                               | 0.00108 |
| STM4086                                                                                                  | glpK    | glycerol kinase                                           | -2.24                                                                              | 0.02838 | 2.12                                                                                | 0.00059 | 0.86                                                                                | 0.06611 |
| STM4086                                                                                                  | glpK    | glycerol kinase                                           | -0.66                                                                              | 0.22927 | 2.24                                                                                | 0.00038 | 1.59                                                                                | 0.00692 |
| STM4087                                                                                                  | glpF    | glycerol diffusion                                        | -2.20                                                                              | 0.01261 | 1.28                                                                                | 0.00624 | 1.53                                                                                | 0.01044 |
| STM4087                                                                                                  | glpF    | glycerol diffusion                                        | -2.30                                                                              | 0.01999 | 1.50                                                                                | 0.00232 | 1.96                                                                                | 0.00693 |
| STM4088                                                                                                  | yiiU    | putative cytoplasmic protein                              | -0.83                                                                              | 0.14605 | 0.00                                                                                | 0.99267 | -0.12                                                                               | 0.76309 |
| STM4088                                                                                                  | yiiU    | putative cytoplasmic protein                              | 0.31                                                                               | 0.44306 | 0.05                                                                                | 0.88013 | 0.81                                                                                | 0.08351 |
| STM4089                                                                                                  | menG    | ribonuclease activity regulator protein RraA              | -0.80                                                                              | 0.11613 | 0.63                                                                                | 0.04334 | -0.07                                                                               | 0.86891 |
| STM4089                                                                                                  | menG    | ribonuclease activity regulator protein RraA              | 0.09                                                                               | 0.83507 | 0.72                                                                                | 0.03695 | 0.98                                                                                | 0.02944 |
| STM4090                                                                                                  | menA    | 1,4-dihydroxy-2-naphthoate octaprenyltransferase,         | -1.24                                                                              | 0.03645 | -0.72                                                                               | 0.07960 | -1.03                                                                               | 0.03798 |
| STM4090                                                                                                  | menA    | 1,4-dihydroxy-2-naphthoate octaprenyltransferase,         | -1.39                                                                              | 0.27994 | -1.09                                                                               | 0.00831 | -2.17                                                                               | 0.03629 |
| STM4091                                                                                                  | hslU    | ATP-dependent protease ATP-binding subunit                | -1.04                                                                              | 0.16127 | -1.06                                                                               | 0.00631 | -1.61                                                                               | 0.00200 |
| STM4091                                                                                                  | hslU    | ATP-dependent protease ATP-binding subunit                | -0.55                                                                              | 0.68331 | -1.00                                                                               | 0.01173 | -2.22                                                                               | 0.01230 |
| STM4092                                                                                                  | hslV    | ATP-dependent protease peptidase subunit                  | -2.78                                                                              | 0.00547 | -0.51                                                                               | 0.09576 | -2.14                                                                               | 0.00078 |
| STM4092                                                                                                  | hslV    | ATP-dependent protease peptidase subunit                  | -2.02                                                                              | 0.00849 | -0.02                                                                               | 0.96015 | -1.61                                                                               | 0.01541 |
| STM4093                                                                                                  | ftsN    | essential cell division protein                           | -1.26                                                                              | 0.08035 | -1.49                                                                               | 0.00270 | -2.12                                                                               | 0.00553 |
| STM4093                                                                                                  | ftsN    | essential cell division protein                           | 2.36                                                                               | 0.01941 | -0.90                                                                               | 0.02631 | -1.24                                                                               | 0.16486 |
| STM4094                                                                                                  | cytR    | transcriptional repressor                                 | -1.16                                                                              | 0.03872 | -2.34                                                                               | 0.00017 | -1.80                                                                               | 0.00166 |
| STM4094                                                                                                  | cytR    | transcriptional repressor                                 | -1.57                                                                              | 0.02682 | -2.38                                                                               | 0.00098 | -2.11                                                                               | 0.00914 |
| STM4095                                                                                                  | priA    | primosome assembly protein PriA                           | -1.74                                                                              | 0.01522 | -1.70                                                                               | 0.00185 | -2.08                                                                               | 0.00840 |
| STM4095                                                                                                  | priA    | primosome assembly protein PriA                           | -2.06                                                                              | 0.12984 | -1.90                                                                               | 0.00301 | -1.47                                                                               | 0.00930 |
| STM4097                                                                                                  | STM4097 | putative outer membrane lipoprotein                       | -1.28                                                                              | 0.03584 | -0.74                                                                               | 0.08032 | -1.31                                                                               | 0.01528 |
| STM4097                                                                                                  | STM4097 | putative outer membrane lipoprotein                       | -0.57                                                                              | 0.33166 | 0.05                                                                                | 0.96225 | -0.25                                                                               | 0.54480 |
| STM4098                                                                                                  | STM4098 | putative arylsulfate sulfotransferase                     | 0.02                                                                               | 0.97908 | 0.64                                                                                | 0.04081 | -1.53                                                                               | 0.01361 |
| STM4098                                                                                                  | STM4098 | putative arylsulfate sulfotransferase                     | 0.54                                                                               | 0.30782 | 0.40                                                                                | 0.19595 | 0.09                                                                                | 0.81281 |
| STM4099                                                                                                  | metJ    | transcriptional repressor protein MetJ                    | -0.71                                                                              | 0.11468 | -0.82                                                                               | 0.03405 | -0.45                                                                               | 0.31697 |
| STM4099                                                                                                  | metJ    | transcriptional repressor protein MetJ                    | -0.56                                                                              | 0.46998 | -0.44                                                                               | 0.12208 | 0.04                                                                                | 0.91503 |
| STM4100                                                                                                  | metB    | cystathionine gamma-synthase                              | -1.52                                                                              | 0.02018 | -0.38                                                                               | 0.30164 | -1.54                                                                               | 0.00354 |
| STM4100                                                                                                  | metB    | cystathionine gamma-synthase                              | 0.07                                                                               | 0.86862 | -0.61                                                                               | 0.05038 | -0.90                                                                               | 0.07640 |
| STM4101                                                                                                  | metL    | bifunctional aspartate kinase II/homoserine dehydrogenase | -1.07                                                                              | 0.23646 | 0.27                                                                                | 0.46856 | -1.73                                                                               | 0.00677 |
| STM4101                                                                                                  | metL    | bifunctional aspartate kinase II/homoserine dehydrogenase | 0.15                                                                               | 0.75518 | -1.17                                                                               | 0.00389 | -2.20                                                                               | 0.02134 |
| STM4102                                                                                                  | STM4102 | putative inner membrane protein                           | 0.93                                                                               | 0.10817 | -0.72                                                                               | 0.10203 | -1.04                                                                               | 0.05084 |
| STM4102                                                                                                  | STM4102 | putative inner membrane protein                           | 1.15                                                                               | 0.07261 | -0.45                                                                               | 0.19321 | 0.00                                                                                | 0.99449 |
| STM4103                                                                                                  | STM4103 | putative cytoplasmic protein                              | 4.43                                                                               | 0.02104 | 3.49                                                                                | 0.00544 | 3.25                                                                                | 0.04848 |
| STM4103                                                                                                  | STM4103 | putative cytoplasmic protein                              | 0.88                                                                               | 0.22379 | 0.69                                                                                | 0.28895 | 2.53                                                                                | 0.01350 |
| STM4104                                                                                                  | STM4104 | putative 5'-nucleotidase/2',3'-cyclic phosphodiesterase   | 0.28                                                                               | 0.75518 | 0.73                                                                                | 0.10307 | 0.66                                                                                | 0.28233 |
| STM4104                                                                                                  | STM4104 | putative 5'-nucleotidase/2',3'-cyclic phosphodiesterase   | 0.84                                                                               | 0.49312 | -0.37                                                                               | 0.47317 | 1.19                                                                                | 0.05832 |
| STM4105                                                                                                  | metF    | 5,10-methylenetetrahydrofolate reductase                  | -0.08                                                                              | 0.92235 | 0.43                                                                                | 0.13424 | 0.35                                                                                | 0.60694 |
| STM4105                                                                                                  | metF    | 5,10-methylenetetrahydrofolate reductase                  | 0.09                                                                               | 0.89675 | 0.87                                                                                | 0.04497 | 0.12                                                                                | 0.88502 |
| STM4106                                                                                                  | katG    | hydroperoxidase                                           | 1.91                                                                               | 0.02423 | -0.29                                                                               | 0.58425 | 1.83                                                                                | 0.03761 |
| STM4106                                                                                                  | katG    | hydroperoxidase                                           | 2.33                                                                               | 0.02096 | 2.79                                                                                | 0.02536 | 1.41                                                                                | 0.33431 |
| STM4107                                                                                                  | yijF    | putative periplasmic protein                              | -0.09                                                                              | 0.90034 | -0.10                                                                               | 0.79430 | -1.67                                                                               | 0.01254 |
| STM4107                                                                                                  | yijF    | putative periplasmic protein                              | 1.28                                                                               | 0.13882 | -0.76                                                                               | 0.10356 | 1.00                                                                                | 0.02197 |
| STM4108                                                                                                  | gldA    | glycerol dehydrogenase                                    | -0.74                                                                              | 0.28305 | -0.98                                                                               | 0.11014 | -0.37                                                                               | 0.49523 |
| STM4108                                                                                                  | gldA    | glycerol dehydrogenase                                    | 0.10                                                                               | 0.88368 | -0.72                                                                               | 0.15462 | 0.07                                                                                | 0.86869 |
| STM4109                                                                                                  | talC    | fructose-6-phosphate aldolase                             | -0.04                                                                              | 0.94059 | 0.30                                                                                | 0.34917 | 0.50                                                                                | 0.21322 |
| STM4109                                                                                                  | talC    | fructose-6-phosphate aldolase                             | -0.09                                                                              | 0.89059 | 0.60                                                                                | 0.05346 | 0.74                                                                                | 0.06912 |
| STM4110                                                                                                  | ptsA    | PEP-protein phosphotransferase                            | 0.16                                                                               | 0.87027 | -0.11                                                                               | 0.81837 | -0.34                                                                               | 0.42713 |
| STM4110                                                                                                  | ptsA    | PEP-protein phosphotransferase                            | 1.01                                                                               | 0.44190 | -0.18                                                                               | 0.67697 | 0.80                                                                                | 0.05871 |
| STM4112                                                                                                  | frwC    | PTS system fructose-like IIC component                    | -0.71                                                                              | 0.20853 | 0.37                                                                                | 0.32228 | -0.81                                                                               | 0.13481 |
| STM4112                                                                                                  | frwC    | PTS system fructose-like IIC component                    | 0.59                                                                               | 0.22927 | 0.21                                                                                | 0.53646 | 0.01                                                                                | 0.98686 |
| STM4113                                                                                                  | frwB    | PTS system fructose-like IIB component 1                  | 0.46                                                                               | 0.30181 | -0.27                                                                               | 0.41946 | -0.12                                                                               | 0.79316 |
| STM4113                                                                                                  | frwB    | PTS system fructose-like IIB component 1                  | 1.01                                                                               | 0.05615 | 0.17                                                                                | 0.56448 | 0.72                                                                                | 0.12561 |
| STM4114                                                                                                  | pflD    | putative pyruvate formate lyase II                        | -0.81                                                                              | 0.08949 | -0.40                                                                               | 0.19420 | -0.31                                                                               | 0.39883 |
| STM4114                                                                                                  | pflD    | putative pyruvate formate lyase II                        | 0.20                                                                               | 0.65612 | 0.25                                                                                | 0.42078 | -0.37                                                                               | 0.39159 |
| STM4115                                                                                                  | pflC    | putative pyruvate formate lyase activating enzyme 2       | 0.71                                                                               | 0.15588 | 0.51                                                                                | 0.07613 | 0.40                                                                                | 0.36913 |
| STM4115                                                                                                  | pflC    | putative pyruvate formate lyase activating enzyme 2       | 0.48                                                                               | 0.67136 | 0.12                                                                                | 0.80056 | 0.58                                                                                | 0.20776 |
| STM4116                                                                                                  | frwD    | PTS system fructose-like IIB component 2                  | 0.52                                                                               | 0.74131 | 0.25                                                                                | 0.44103 | 0.33                                                                                | 0.54311 |
| STM4116                                                                                                  | frwD    | PTS system fructose-like IIB component 2                  | -0.12                                                                              | 0.82473 | -0.26                                                                               | 0.42158 | 1.31                                                                                | 0.23647 |

**Table S2.** Genome-wide expression of *Salmonella enterica* serovar Typhimurium inside fibroblasts

Intracellular WT 24 h p.i.      Intracellular *phoP* 24 h p.i.      Extracellular WT stationary phase

Relative to WT exponential LB      Relative to *phoP* exponential LB      Relative to WT exponential LB



| Systematic name | Gene | Product                                      | log2Ratio (M) | p value | log2Ratio (M) | p value | log2Ratio (M) | p value |
|-----------------|------|----------------------------------------------|---------------|---------|---------------|---------|---------------|---------|
| STM4117         | yijO | putative regulatory protein                  | -0.35         | 0.42383 | 0.53          | 0.24559 | 0.64          | 0.44638 |
| STM4117         | yijO | putative regulatory protein                  | -0.19         | 0.81152 | -0.26         | 0.50555 | 0.76          | 0.59189 |
| STM4118         | yijP | putative integral membrane protein           | -1.68         | 0.07680 | -0.87         | 0.10414 | -0.75         | 0.25130 |
| STM4118         | yijP | putative integral membrane protein           | -1.75         | 0.06325 | -1.94         | 0.00408 | -3.77         | 0.00797 |
| STM4119         | ppc  | phosphoenolpyruvate carboxylase              | -1.47         | 0.01942 | -1.39         | 0.00307 | -1.82         | 0.01256 |
| STM4119         | ppc  | phosphoenolpyruvate carboxylase              | -0.77         | 0.32640 | -1.25         | 0.00526 | -2.03         | 0.00381 |
| STM4120         | argE | acetylornithine deacetylase                  | -1.48         | 0.03113 | 0.12          | 0.78905 | -0.95         | 0.12918 |
| STM4120         | argE | acetylornithine deacetylase                  | -2.08         | 0.02178 | 0.28          | 0.44435 | -1.92         | 0.04876 |
| STM4121         | argC | N-acetyl-gamma-glutamyl-phosphate reductase  | -0.41         | 0.35323 | -0.81         | 0.03476 | -0.38         | 0.34729 |
| STM4121         | argC | N-acetyl-gamma-glutamyl-phosphate reductase  | 0.14          | 0.80932 | -0.55         | 0.11136 | -0.35         | 0.51477 |
| STM4122         | argB | acetylglutamate kinase                       | -1.11         | 0.05095 | 0.08          | 0.82055 | -0.22         | 0.64867 |
| STM4122         | argB | acetylglutamate kinase                       | -1.02         | 0.05737 | 0.57          | 0.13571 | -0.36         | 0.64280 |
| STM4123         | argH | argininosuccinate lyase                      | -0.10         | 0.87265 | -0.67         | 0.05719 | -0.11         | 0.87393 |
| STM4123         | argH | argininosuccinate lyase                      | 1.15          | 0.10559 | 0.10          | 0.78792 | 0.63          | 0.15094 |
| STM4125         | oxyR | oxidative stress regulatory protein          | -0.47         | 0.25608 | 0.57          | 0.10851 | -1.42         | 0.00320 |
| STM4125         | oxyR | oxidative stress regulatory protein          | 0.38          | 0.57728 | 0.94          | 0.00886 | -1.00         | 0.03057 |
| STM4126         | udhA | soluble pyridine nucleotide transhydrogenase | -1.75         | 0.03453 | 0.37          | 0.33122 | -0.75         | 0.17244 |
| STM4126         | udhA | soluble pyridine nucleotide transhydrogenase | -0.84         | 0.07734 | 0.72          | 0.07803 | -0.83         | 0.06313 |
| STM4127         | yijC | putative transcriptional repressor           | -2.16         | 0.01314 | 0.42          | 0.16645 | -1.67         | 0.02252 |
| STM4127         | yijC | putative transcriptional repressor           | -0.69         | 0.52039 | 0.07          | 0.82309 | -0.37         | 0.32284 |
| STM4128         | yijD | putative inner membrane protein              | -1.51         | 0.03013 | -0.70         | 0.04662 | -2.48         | 0.00154 |
| STM4128         | yijD | putative inner membrane protein              | 0.46          | 0.50506 | -0.05         | 0.89183 | -1.49         | 0.00780 |
| STM4129         | trmA | tRNA (uracil-5-)-methyltransferase           | 1.14          | 0.21875 | -0.93         | 0.01975 | -1.16         | 0.06111 |
| STM4129         | trmA | tRNA (uracil-5-)-methyltransferase           | 2.67          | 0.01982 | 0.66          | 0.50209 | 1.51          | 0.19547 |
| STM4130         | btuB | outer membrane receptor protein precursor    | -0.83         | 0.10740 | -0.96         | 0.01045 | 0.02          | 0.96386 |
| STM4130         | btuB | outer membrane receptor protein precursor    | -1.48         | 0.02109 | -1.13         | 0.02518 | 0.60          | 0.11767 |
| STM4131         | murl | glutamate racemase                           | -1.83         | 0.03325 | -0.19         | 0.61715 | 0.89          | 0.06486 |
| STM4131         | murl | glutamate racemase                           | -0.34         | 0.49224 | 0.20          | 0.55350 | 1.54          | 0.00589 |
| STM4132         | rrsB | STM4132                                      | -2.49         | 0.04718 | 0.42          | 0.23151 | -0.60         | 0.22763 |
| STM4132         | rrsB | STM4132                                      | -1.89         | 0.13788 | 0.81          | 0.07672 | -0.01         | 0.98634 |
| STM4133         | ileU | STM4133                                      | 0.63          | 0.30527 | 0.47          | 0.13924 | 0.83          | 0.05675 |
| STM4133         | ileU | STM4133                                      | 1.23          | 0.05078 | 0.32          | 0.26541 | 0.86          | 0.05020 |
| STM4134         | -    | STM4134                                      | 1.36          | 0.02504 | 0.46          | 0.16993 | 0.21          | 0.56805 |
| STM4134         | -    | STM4134                                      | 0.88          | 0.20103 | 0.24          | 0.45960 | 0.39          | 0.29573 |
| STM4135         | rrlB | STM4135                                      | -2.70         | 0.00558 | -0.78         | 0.20062 | -1.69         | 0.00854 |
| STM4135         | rrlB | STM4135                                      | -2.65         | 0.01227 | -0.18         | 0.78792 | -2.04         | 0.00601 |
| STM4135         | rrlB | STM4135                                      | -2.74         | 0.00817 | -0.13         | 0.84235 | -1.90         | 0.00336 |
| STM4135         | rrlB | STM4135                                      | -2.96         | 0.00818 | -0.25         | 0.68415 | -1.54         | 0.00872 |
| STM4136         | rrfB | STM4136                                      | 0.55          | 0.52763 | 0.36          | 0.56399 | 0.97          | 0.09893 |
| STM4136         | rrfB | STM4136                                      | 1.49          | 0.02973 | -0.09         | 0.83378 | 0.92          | 0.04801 |
| STM4138         | birA | biotin--protein ligase                       | -1.02         | 0.08090 | -1.33         | 0.00216 | -1.34         | 0.00515 |
| STM4138         | birA | biotin--protein ligase                       | -0.90         | 0.06424 | -1.56         | 0.00590 | -0.26         | 0.59003 |
| STM4139         | coaA | pantothenate kinase                          | -1.94         | 0.01038 | -2.20         | 0.00054 | -1.79         | 0.00112 |
| STM4139         | coaA | pantothenate kinase                          | -1.39         | 0.01950 | -2.06         | 0.00073 | -0.92         | 0.02314 |
| STM4142         | thrU | STM4142                                      | -3.69         | 0.01468 | -1.09         | 0.06149 | 1.29          | 0.08325 |
| STM4142         | thrU | STM4142                                      | -2.98         | 0.00727 | -0.65         | 0.20189 | 1.59          | 0.00437 |
| STM4143         | tyrU | STM4143                                      | -0.52         | 0.47818 | -1.15         | 0.01051 | -0.37         | 0.47468 |
| STM4143         | tyrU | STM4143                                      | 1.15          | 0.05553 | -1.16         | 0.03039 | 0.39          | 0.45535 |
| STM4144         | glyT | STM4144                                      | -4.73         | 0.00512 | -3.11         | 0.00070 | -3.31         | 0.00020 |
| STM4144         | glyT | STM4144                                      | -4.48         | 0.00512 | -3.19         | 0.00004 | -3.71         | 0.00007 |
| STM4145         | thrT | STM4145                                      | -1.54         | 0.07016 | -1.64         | 0.00338 | -1.76         | 0.00233 |
| STM4145         | thrT | STM4145                                      | -1.57         | 0.04630 | -1.57         | 0.00071 | -1.89         | 0.00250 |
| STM4146         | tuf  | elongation factor Tu                         | -2.89         | 0.00931 | -1.26         | 0.00239 | -5.22         | 0.00002 |
| STM4146         | tuf  | elongation factor Tu                         | -2.05         | 0.05255 | -1.57         | 0.00160 | -4.47         | 0.00007 |
| STM4147         | secE | translocase                                  | 3.40          | 0.00747 | -0.99         | 0.03607 | 1.79          | 0.15625 |
| STM4147         | secE | translocase                                  | 2.31          | 0.30135 | -1.41         | 0.00411 | -0.50         | 0.61721 |
| STM4148         | nusG | transcription antitermination protein NusG   | -2.94         | 0.00554 | -2.03         | 0.01654 | -3.19         | 0.00008 |
| STM4148         | nusG | transcription antitermination protein NusG   | -2.39         | 0.00753 | -1.62         | 0.00116 | -3.69         | 0.00004 |
| STM4149         | rplK | 50S ribosomal protein L11                    | -3.32         | 0.01041 | -1.47         | 0.00098 | -5.17         | 0.00002 |
| STM4149         | rplK | 50S ribosomal protein L11                    | -2.24         | 0.00962 | -1.31         | 0.00203 | -4.97         | 0.00002 |
| STM4150         | rplA | 50S ribosomal protein L1                     | -3.73         | 0.00547 | -2.43         | 0.00015 | -6.17         | 0.00002 |
| STM4150         | rplA | 50S ribosomal protein L1                     | -3.81         | 0.00512 | -2.27         | 0.00047 | -6.77         | 0.00001 |
| STM4151         | rplJ | 50S ribosomal protein L10                    | -2.84         | 0.00747 | -1.15         | 0.02335 | -5.37         | 0.00002 |
| STM4151         | rplJ | 50S ribosomal protein L10                    | -2.61         | 0.01193 | -0.59         | 0.05150 | -5.20         | 0.00002 |
| STM4152         | rplL | 50S ribosomal protein L7/L12                 | -0.79         | 0.23318 | 0.67          | 0.19117 | -3.32         | 0.00009 |
| STM4152         | rplL | 50S ribosomal protein L7/L12                 | -0.19         | 0.72937 | 0.70          | 0.03140 | -3.34         | 0.00008 |
| STM4153         | rpoB | DNA-directed RNA polymerase beta subunit     | -2.63         | 0.00574 | -1.36         | 0.00477 | -3.98         | 0.00007 |
| STM4153         | rpoB | DNA-directed RNA polymerase beta subunit     | -3.71         | 0.00747 | -1.22         | 0.00323 | -4.09         | 0.00027 |
| STM4154         | rpoC | DNA-directed RNA polymerase beta' subunit    | -1.96         | 0.06201 | -0.71         | 0.04063 | -1.30         | 0.01833 |
| STM4154         | rpoC | DNA-directed RNA polymerase beta' subunit    | -1.61         | 0.13830 | -0.64         | 0.08277 | -1.17         | 0.02758 |

**Table S2.** Genome-wide expression of *Salmonella enterica* serovar Typhimurium inside fibroblasts

Intracellular WT 24 h p.i.      Intracellular *phoP* 24 h p.i.      Extracellular WT stationary phase

Relative to WT exponential LB      Relative to *phoP* exponential LB      Relative to WT exponential LB



| Systematic name | Gene    | Product                                                  | log2Ratio (M) | p value | log2Ratio (M) | p value | log2Ratio (M) | p value |
|-----------------|---------|----------------------------------------------------------|---------------|---------|---------------|---------|---------------|---------|
| STM4155         | STM4155 | putative inner membrane protein                          | -1.36         | 0.02636 | -1.18         | 0.01124 | -1.10         | 0.01789 |
| STM4155         | STM4155 | putative inner membrane protein                          | -1.01         | 0.13154 | -1.07         | 0.00623 | -1.15         | 0.04242 |
| STM4156         | STM4156 | putative cytoplasmic protein                             | -1.13         | 0.06702 | -1.37         | 0.00872 | -1.47         | 0.00416 |
| STM4156         | STM4156 | putative cytoplasmic protein                             | -0.70         | 0.12999 | -0.86         | 0.02000 | -0.69         | 0.17351 |
| STM4157         | STM4157 | putative cytoplasmic protein                             | -0.52         | 0.22459 | -0.71         | 0.06040 | -0.94         | 0.06238 |
| STM4157         | STM4157 | putative cytoplasmic protein                             | -0.12         | 0.81119 | -0.33         | 0.35648 | -0.28         | 0.71695 |
| STM4158         | STM4158 | putative cytoplasmic protein                             | 0.10          | 0.82716 | -1.29         | 0.04804 | -1.82         | 0.00275 |
| STM4158         | STM4158 | putative cytoplasmic protein                             | 1.80          | 0.08923 | -0.30         | 0.55660 | -0.54         | 0.23368 |
| STM4159         | thiH    | thiamine biosynthesis protein ThiH                       | 0.23          | 0.87330 | 0.72          | 0.14228 | 0.13          | 0.85588 |
| STM4159         | thiH    | thiamine biosynthesis protein ThiH                       | 1.68          | 0.02844 | 1.42          | 0.00835 | -0.63         | 0.33828 |
| STM4160         | thiG    | thiazole synthase                                        | 0.07          | 0.91539 | 1.90          | 0.00087 | -0.37         | 0.54635 |
| STM4160         | thiG    | thiazole synthase                                        | 2.12          | 0.06532 | 2.16          | 0.00038 | -0.40         | 0.28789 |
| STM4161         | STM4161 | sulfur carrier protein ThiS                              | 0.72          | 0.13328 | 1.76          | 0.00244 | -0.90         | 0.11552 |
| STM4161         | STM4161 | sulfur carrier protein ThiS                              | 0.89          | 0.11238 | 2.09          | 0.00119 | -1.57         | 0.08828 |
| STM4162         | thiF    | thiamine biosynthesis protein ThiF                       | 0.47          | 0.47931 | 2.90          | 0.00007 | -1.50         | 0.00614 |
| STM4162         | thiF    | thiamine biosynthesis protein ThiF                       | 0.88          | 0.36979 | 2.68          | 0.00058 | -0.34         | 0.40687 |
| STM4163         | thiE    | thiamine-phosphate pyrophosphorylase                     | -0.23         | 0.72937 | 1.82          | 0.00058 | -0.18         | 0.72522 |
| STM4163         | thiE    | thiamine-phosphate pyrophosphorylase                     | 0.58          | 0.20774 | 1.93          | 0.00077 | -0.15         | 0.68608 |
| STM4164         | thiC    | thiamine biosynthesis protein ThiC                       | -0.64         | 0.22926 | 1.73          | 0.00258 | -1.46         | 0.05783 |
| STM4164         | thiC    | thiamine biosynthesis protein ThiC                       | -0.02         | 0.97602 | 1.89          | 0.00364 | -1.59         | 0.00875 |
| STM4165         | rsd     | anti sigma 70 factor                                     | 0.76          | 0.12475 | 1.55          | 0.00180 | 1.04          | 0.01756 |
| STM4165         | rsd     | anti sigma 70 factor                                     | 1.02          | 0.09819 | 1.40          | 0.00216 | 1.65          | 0.00841 |
| STM4166         | nudC    | NADH pyrophosphatase                                     | -0.76         | 0.19642 | -0.61         | 0.04858 | -0.67         | 0.14623 |
| STM4166         | nudC    | NADH pyrophosphatase                                     | -0.68         | 0.17077 | -0.85         | 0.01839 | -0.96         | 0.04086 |
| STM4167         | hemE    | uroporphyrinogen decarboxylase                           | -1.12         | 0.09625 | -0.67         | 0.05034 | -1.85         | 0.00772 |
| STM4167         | hemE    | uroporphyrinogen decarboxylase                           | -1.30         | 0.04449 | -0.59         | 0.11725 | -1.29         | 0.01971 |
| STM4168         | nfi     | endonuclease V                                           | -0.47         | 0.29809 | -0.92         | 0.01413 | -1.46         | 0.00277 |
| STM4168         | nfi     | endonuclease V                                           | 0.07          | 0.92982 | -0.66         | 0.23977 | -1.59         | 0.03030 |
| STM4169         | yjaG    | putative cytoplasmic protein                             | -1.39         | 0.02655 | -0.82         | 0.03468 | -2.65         | 0.00070 |
| STM4169         | yjaG    | putative cytoplasmic protein                             | -0.18         | 0.74302 | -0.55         | 0.09153 | -1.86         | 0.00324 |
| STM4170         | hupA    | DNA-binding protein HU-alpha                             | -3.99         | 0.00643 | -2.74         | 0.00070 | -4.10         | 0.00004 |
| STM4170         | hupA    | DNA-binding protein HU-alpha                             | -4.57         | 0.00558 | -2.53         | 0.00039 | -4.96         | 0.00002 |
| STM4171         | yjaH    | putative inner membrane protein                          | 5.03          | 0.01679 | -0.05         | 0.89366 | 1.34          | 0.24346 |
| STM4171         | yjaH    | putative inner membrane protein                          | 0.73          | 0.20978 | 0.06          | 0.86854 | 0.45          | 0.77058 |
| STM4172         | zraP    | zinc-resistance associated protein                       | -0.82         | 0.08227 | 0.89          | 0.06663 | -0.93         | 0.14140 |
| STM4172         | zraP    | zinc-resistance associated protein                       | -0.17         | 0.78339 | 0.81          | 0.03583 | -0.96         | 0.19575 |
| STM4173         | hydH    | sensor kinase                                            | -1.14         | 0.04050 | -0.62         | 0.13335 | -1.44         | 0.01010 |
| STM4173         | hydH    | sensor kinase                                            | -0.27         | 0.51616 | -0.70         | 0.10206 | -0.81         | 0.12119 |
| STM4174         | hydG    | response regulator                                       | -0.68         | 0.27054 | -0.26         | 0.49934 | -0.82         | 0.05429 |
| STM4174         | hydG    | response regulator                                       | -0.24         | 0.87663 | -1.02         | 0.02008 | -2.52         | 0.01166 |
| STM4175         | purD    | phosphoribosylamine--glycine ligase                      | -1.07         | 0.13812 | -0.72         | 0.03332 | -1.28         | 0.02500 |
| STM4175         | purD    | phosphoribosylamine--glycine ligase                      | -0.38         | 0.40255 | 0.00          | 0.99257 | -1.19         | 0.00771 |
| STM4176         | purH    | bifunctional phosphoribosylaminoimidazolecarboxamide     | -1.44         | 0.02265 | 0.42          | 0.33003 | -0.17         | 0.70282 |
| STM4176         | purH    | bifunctional phosphoribosylaminoimidazolecarboxamide     | 0.62          | 0.54043 | 0.87          | 0.01267 | 0.06          | 0.87186 |
| STM4177         | rrsE    | STM4177                                                  | -2.10         | 0.05093 | 0.16          | 0.75138 | 0.01          | 0.99237 |
| STM4177         | rrsE    | STM4177                                                  | -1.62         | 0.08918 | 0.61          | 0.20240 | 0.75          | 0.11360 |
| STM4178         | gltV    | STM4178                                                  | 1.69          | 0.02338 | 0.91          | 0.03050 | 1.11          | 0.01089 |
| STM4178         | gltV    | STM4178                                                  | 1.76          | 0.01219 | 0.72          | 0.05946 | 1.28          | 0.01643 |
| STM4180         | rrfE    | STM4180                                                  | 0.32          | 0.68656 | -0.40         | 0.35270 | 0.39          | 0.46380 |
| STM4180         | rrfE    | STM4180                                                  | 0.65          | 0.17418 | -0.63         | 0.12250 | 0.27          | 0.51783 |
| STM4181         | yjaB    | putative acetyltransferase                               | -0.83         | 0.20050 | -0.46         | 0.16554 | 1.47          | 0.01145 |
| STM4181         | yjaB    | putative acetyltransferase                               | -1.48         | 0.33047 | 0.08          | 0.83570 | 1.26          | 0.01331 |
| STM4182         | metA    | homoserine O-succinyltransferase                         | -0.61         | 0.19107 | -0.83         | 0.02370 | 0.21          | 0.60212 |
| STM4182         | metA    | homoserine O-succinyltransferase                         | -0.61         | 0.35495 | -1.20         | 0.00296 | 0.17          | 0.71709 |
| STM4183         | aceB    | malate synthase                                          | 3.02          | 0.05608 | 2.01          | 0.00121 | 4.98          | 0.00071 |
| STM4183         | aceB    | malate synthase                                          | 1.25          | 0.13407 | 1.96          | 0.00041 | 4.65          | 0.00607 |
| STM4184         | aceA    | isocitrate lyase                                         | 0.43          | 0.47494 | 1.33          | 0.00414 | 1.98          | 0.00087 |
| STM4184         | aceA    | isocitrate lyase                                         | 1.00          | 0.10845 | 1.11          | 0.02490 | 2.64          | 0.00306 |
| STM4185         | aceK    | bifunctional isocitrate dehydrogenase kinase/phosphatase | 2.40          | 0.02663 | -0.43         | 0.17441 | 0.12          | 0.85907 |
| STM4185         | aceK    | bifunctional isocitrate dehydrogenase kinase/phosphatase | 1.77          | 0.02830 | -0.90         | 0.18222 | 1.10          | 0.11389 |
| STM4186         | STM4186 | putative cytoplasmic protein                             | -0.03         | 0.97301 | -0.38         | 0.43230 | -0.41         | 0.39558 |
| STM4186         | STM4186 | putative cytoplasmic protein                             | 0.98          | 0.30727 | -0.64         | 0.05732 | 0.82          | 0.13878 |
| STM4187         | iclR    | acetate operon transcriptional repressor                 | -1.56         | 0.08578 | -1.73         | 0.00095 | -0.30         | 0.60322 |
| STM4187         | iclR    | acetate operon transcriptional repressor                 | 1.32          | 0.48347 | -1.62         | 0.00277 | -0.57         | 0.25639 |
| STM4188,S       | methH   | B12-dependent methionine synthase                        | -0.40         | 0.52494 | 0.01          | 0.97944 | 0.09          | 0.87159 |
| STM4188,S       | methH   | B12-dependent methionine synthase                        | 1.79          | 0.03732 | -1.00         | 0.01354 | 0.43          | 0.32953 |
| STM4189         | yjbB    | putative transport protein                               | -0.79         | 0.20982 | -0.18         | 0.62607 | 0.07          | 0.89389 |
| STM4189         | yjbB    | putative transport protein                               | -0.04         | 0.96062 | -0.64         | 0.13091 | 0.24          | 0.57857 |
| STM4190         | pepE    | peptidase E                                              | 1.36          | 0.08658 | -1.31         | 0.00700 | -1.37         | 0.03580 |
| STM4190         | pepE    | peptidase E                                              | 1.94          | 0.01034 | -1.33         | 0.00342 | 0.10          | 0.81829 |

**Table S2.** Genome-wide expression of *Salmonella enterica* serovar Typhimurium inside fibroblasts

|                                                                                                          |           |                                                | Intracellular WT<br>24 h p.i.                                                      |         | Intracellular <i>phoP</i><br>24 h p.i.                                              |         | Extracellular WT<br>stationary phase                                                |         |
|----------------------------------------------------------------------------------------------------------|-----------|------------------------------------------------|------------------------------------------------------------------------------------|---------|-------------------------------------------------------------------------------------|---------|-------------------------------------------------------------------------------------|---------|
| Table S2. Genome-wide expression of <i>Salmonella enterica</i> serovar<br>Typhimurium inside fibroblasts |           |                                                | Relative to WT<br>exponential LB                                                   |         | Relative to <i>phoP</i><br>exponential LB                                           |         | Relative to WT<br>exponential LB                                                    |         |
|                                                                                                          |           |                                                |  |         |  |         | 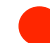 |         |
| Systematic<br>name                                                                                       | Gene      | Product                                        | log2Ratio<br>(M)                                                                   | p value | log2Ratio<br>(M)                                                                    | p value | log2Ratio<br>(M)                                                                    | p value |
| STM4191                                                                                                  | STM4191   | putative cytoplasmic protein                   | -0.29                                                                              | 0.51301 | -0.52                                                                               | 0.14327 | -0.22                                                                               | 0.67847 |
| STM4191                                                                                                  | STM4191   | putative cytoplasmic protein                   | 1.06                                                                               | 0.05343 | -0.92                                                                               | 0.11459 | 0.71                                                                                | 0.13228 |
| STM4192                                                                                                  | STM4192   | putative cytoplasmic protein                   | -1.68                                                                              | 0.01417 | -0.83                                                                               | 0.01890 | -1.66                                                                               | 0.00964 |
| STM4192                                                                                                  | STM4192   | putative cytoplasmic protein                   | -1.16                                                                              | 0.03429 | -0.81                                                                               | 0.02913 | -1.19                                                                               | 0.0161  |
| STM4193                                                                                                  | yjbC      | putative pseudouridine synthase                | -1.24                                                                              | 0.08393 | -0.53                                                                               | 0.17550 | -0.83                                                                               | 0.23342 |
| STM4193                                                                                                  | yjbC      | putative pseudouridine synthase                | -0.49                                                                              | 0.39885 | -0.76                                                                               | 0.04987 | -0.95                                                                               | 0.05165 |
| STM4194                                                                                                  | yjbD      | putative cytoplasmic protein                   | -1.06                                                                              | 0.07052 | -0.31                                                                               | 0.46008 | -0.99                                                                               | 0.04268 |
| STM4194                                                                                                  | yjbD      | putative cytoplasmic protein                   | -0.26                                                                              | 0.69193 | -0.73                                                                               | 0.03037 | -1.09                                                                               | 0.03457 |
| STM4195                                                                                                  | STM4195   | putative Na+-dependent transporter             | -0.21                                                                              | 0.70070 | 1.06                                                                                | 0.00597 | 0.29                                                                                | 0.52459 |
| STM4195                                                                                                  | STM4195   | putative Na+-dependent transporter             | 1.88                                                                               | 0.00998 | 1.05                                                                                | 0.00539 | 0.72                                                                                | 0.12647 |
| STM4196                                                                                                  | STM4196   | putative cytoplasmic protein                   | 0.31                                                                               | 0.55995 | 0.39                                                                                | 0.24308 | 0.06                                                                                | 0.87634 |
| STM4196                                                                                                  | STM4196   | putative cytoplasmic protein                   | 1.81                                                                               | 0.01228 | 0.36                                                                                | 0.26389 | 1.48                                                                                | 0.00659 |
| STM4198                                                                                                  | STM4198   | putative cytoplasmic protein                   | 0.47                                                                               | 0.51664 | 0.07                                                                                | 0.88895 | -0.16                                                                               | 0.73380 |
| STM4198                                                                                                  | STM4198   | putative cytoplasmic protein                   | 1.20                                                                               | 0.13695 | 0.20                                                                                | 0.62650 | 0.98                                                                                | 0.28421 |
| STM4199                                                                                                  | STM4199   | putative cytoplasmic protein                   | 1.61                                                                               | 0.06919 | -1.53                                                                               | 0.00165 | -0.97                                                                               | 0.12985 |
| STM4199                                                                                                  | STM4199   | putative cytoplasmic protein                   | 1.99                                                                               | 0.05707 | -2.05                                                                               | 0.00141 | 0.31                                                                                | 0.65232 |
| STM4200                                                                                                  | STM4200   | putative phage tail fiber protein H            | -0.15                                                                              | 0.86599 | -0.44                                                                               | 0.19945 | -0.66                                                                               | 0.24859 |
| STM4200                                                                                                  | STM4200   | putative phage tail fiber protein H            | 0.80                                                                               | 0.21801 | -0.12                                                                               | 0.78417 | 0.16                                                                                | 0.80855 |
| STM4201                                                                                                  | STM4201   | putative phage tail protein                    | -0.69                                                                              | 0.35215 | 0.85                                                                                | 0.04470 | -0.99                                                                               | 0.01869 |
| STM4201                                                                                                  | STM4201   | putative phage tail protein                    | 0.50                                                                               | 0.34672 | -0.51                                                                               | 0.33936 | -0.23                                                                               | 0.63239 |
| STM4202                                                                                                  | STM4202   | putative phage baseplate protein               | 0.16                                                                               | 0.77593 | 0.31                                                                                | 0.47759 | -0.04                                                                               | 0.94831 |
| STM4202                                                                                                  | STM4202   | putative phage baseplate protein               | 1.47                                                                               | 0.01972 | -0.35                                                                               | 0.35297 | 0.56                                                                                | 0.42791 |
| STM4203                                                                                                  | STM4203   | putative phage baseplate protein               | 0.62                                                                               | 0.36909 | -0.20                                                                               | 0.82949 | -0.58                                                                               | 0.44017 |
| STM4203                                                                                                  | STM4203   | putative phage baseplate protein               | 1.49                                                                               | 0.04658 | -1.24                                                                               | 0.00328 | -0.32                                                                               | 0.67526 |
| STM4204                                                                                                  | STM4204   | putative inner membrane protein                | 0.18                                                                               | 0.72134 | 0.07                                                                                | 0.82168 | 0.37                                                                                | 0.35846 |
| STM4204                                                                                                  | STM4204   | putative inner membrane protein                | 0.67                                                                               | 0.17278 | -0.63                                                                               | 0.34675 | 1.61                                                                                | 0.00777 |
| STM4205                                                                                                  | STM4205   | putative phage glycosyltransferase             | 3.94                                                                               | 0.09035 | -1.03                                                                               | 0.02982 | 1.85                                                                                | 0.02050 |
| STM4205                                                                                                  | STM4205   | putative phage glycosyltransferase             | 2.65                                                                               | 0.00778 | -0.45                                                                               | 0.46930 | 2.01                                                                                | 0.00084 |
| STM4206                                                                                                  | STM4206   | putative phage glucose translocase             | -1.18                                                                              | 0.05376 | -0.87                                                                               | 0.04993 | -0.64                                                                               | 0.24726 |
| STM4206                                                                                                  | STM4206   | putative phage glucose translocase             | -1.15                                                                              | 0.08194 | -1.31                                                                               | 0.00834 | -1.11                                                                               | 0.07640 |
| STM4207                                                                                                  | STM4207   | putative phage baseplate component             | 0.09                                                                               | 0.91568 | 1.04                                                                                | 0.51355 | -0.55                                                                               | 0.19128 |
| STM4207                                                                                                  | STM4207   | putative phage baseplate component             | 2.35                                                                               | 0.09054 | 0.51                                                                                | 0.42559 | 0.17                                                                                | 0.70671 |
| STM4208                                                                                                  | STM4208   | putative cytoplasmic protein                   | 1.02                                                                               | 0.38079 | -0.52                                                                               | 0.18999 | -0.31                                                                               | 0.48726 |
| STM4208                                                                                                  | STM4208   | putative cytoplasmic protein                   | 1.43                                                                               | 0.10082 | -0.50                                                                               | 0.12913 | 0.32                                                                                | 0.53049 |
| STM4209                                                                                                  | STM4209   | putative inner membrane protein                | 0.80                                                                               | 0.16405 | -0.35                                                                               | 0.37676 | -0.29                                                                               | 0.59568 |
| STM4209                                                                                                  | STM4209   | putative inner membrane protein                | 0.59                                                                               | 0.20729 | -0.14                                                                               | 0.83471 | 1.23                                                                                | 0.00809 |
| STM4210                                                                                                  | STM4210   | putative methyl-accepting chemotaxis protein   | -0.23                                                                              | 0.61858 | -0.36                                                                               | 0.40347 | -0.71                                                                               | 0.40856 |
| STM4210                                                                                                  | STM4210   | putative methyl-accepting chemotaxis protein   | -0.11                                                                              | 0.87933 | -1.26                                                                               | 0.01975 | -1.04                                                                               | 0.24665 |
| STM4211                                                                                                  | STM4211   | putative phage tail protein                    | 0.15                                                                               | 0.77288 | -0.93                                                                               | 0.01938 | -1.01                                                                               | 0.14793 |
| STM4211                                                                                                  | STM4211   | putative phage tail protein                    | 1.15                                                                               | 0.21572 | -1.41                                                                               | 0.00239 | -0.21                                                                               | 0.70823 |
| STM4212                                                                                                  | STM4212   | putative phage tail core protein               | -0.14                                                                              | 0.74633 | 0.07                                                                                | 0.88193 | -0.07                                                                               | 0.92589 |
| STM4212                                                                                                  | STM4212   | putative phage tail core protein               | -1.13                                                                              | 0.27954 | -0.43                                                                               | 0.12072 | 0.15                                                                                | 0.85553 |
| STM4213                                                                                                  | STM4213   | putative phage tail sheath protein             | 0.03                                                                               | 0.96122 | -1.24                                                                               | 0.02182 | -1.02                                                                               | 0.12272 |
| STM4213                                                                                                  | STM4213   | putative phage tail sheath protein             | 1.17                                                                               | 0.07413 | 0.03                                                                                | 0.91349 | 0.09                                                                                | 0.92766 |
| STM4214                                                                                                  | STM4214   | putative cytoplasmic protein                   | 0.97                                                                               | 0.13486 | 0.45                                                                                | 0.17126 | 0.68                                                                                | 0.34563 |
| STM4214                                                                                                  | STM4214   | putative cytoplasmic protein                   | 3.27                                                                               | 0.00895 | 0.16                                                                                | 0.72305 | 1.70                                                                                | 0.00534 |
| STM4215                                                                                                  | STM4215   | putative cytoplasmic protein                   | 1.38                                                                               | 0.12596 | 0.30                                                                                | 0.52587 | -0.34                                                                               | 0.61895 |
| STM4215                                                                                                  | STM4215   | putative cytoplasmic protein                   | 2.47                                                                               | 0.00889 | 0.02                                                                                | 0.96002 | 0.52                                                                                | 0.27368 |
| STM4216                                                                                                  | STM4216   | putative inner membrane protein                | 0.35                                                                               | 0.51566 | 0.86                                                                                | 0.03021 | 0.21                                                                                | 0.67325 |
| STM4216                                                                                                  | STM4216   | putative inner membrane protein                | 1.87                                                                               | 0.04345 | 0.63                                                                                | 0.41919 | 2.51                                                                                | 0.00096 |
| STM4217                                                                                                  | STM4217   | putative soluble lytic murein transglycosylase | -0.30                                                                              | 0.63908 | -1.36                                                                               | 0.04891 | -1.05                                                                               | 0.03631 |
| STM4217                                                                                                  | STM4217   | putative soluble lytic murein transglycosylase | 0.64                                                                               | 0.30002 | -0.94                                                                               | 0.19282 | 1.04                                                                                | 0.24140 |
| STM4218                                                                                                  | STM4218   | putative inner membrane protein                | -1.40                                                                              | 0.03599 | -1.54                                                                               | 0.02582 | -1.41                                                                               | 0.09679 |
| STM4218                                                                                                  | STM4218   | putative inner membrane protein                | -0.33                                                                              | 0.45553 | -2.06                                                                               | 0.00350 | -1.31                                                                               | 0.01498 |
| STM4219,S                                                                                                | STM4219,S | putative cytoplasmic protein                   | -0.65                                                                              | 0.35130 | 0.44                                                                                | 0.24643 | -0.80                                                                               | 0.24764 |
| STM4219,S                                                                                                | STM4219,S | putative cytoplasmic protein                   | 0.68                                                                               | 0.21044 | 0.37                                                                                | 0.21976 | 0.61                                                                                | 0.08820 |
| STM4220                                                                                                  | lysC      | aspartate kinase III                           | -0.48                                                                              | 0.30747 | -0.19                                                                               | 0.67544 | -1.19                                                                               | 0.01408 |
| STM4220                                                                                                  | lysC      | aspartate kinase III                           | 1.75                                                                               | 0.14412 | -0.33                                                                               | 0.66381 | -0.65                                                                               | 0.58500 |
| STM4221                                                                                                  | pgi       | glucose-6-phosphate isomerase                  | -3.54                                                                              | 0.00547 | -0.43                                                                               | 0.36283 | -1.44                                                                               | 0.00601 |
| STM4221                                                                                                  | pgi       | glucose-6-phosphate isomerase                  | -4.34                                                                              | 0.00672 | -0.12                                                                               | 0.74569 | -3.04                                                                               | 0.00154 |
| STM4222,S                                                                                                | yjbE      | putative outer membrane protein                | -0.16                                                                              | 0.71667 | -1.09                                                                               | 0.00597 | -1.44                                                                               | 0.01405 |
| STM4222,S                                                                                                | yjbE      | putative outer membrane protein                | 0.35                                                                               | 0.59233 | -1.36                                                                               | 0.00447 | -0.81                                                                               | 0.30166 |
| STM4223                                                                                                  | yjbF      | putative outer membrane lipoprotein            | 0.17                                                                               | 0.71027 | 0.11                                                                                | 0.75947 | 0.10                                                                                | 0.83913 |
| STM4223                                                                                                  | yjbF      | putative outer membrane lipoprotein            | 1.50                                                                               | 0.01595 | -0.61                                                                               | 0.14344 | 0.67                                                                                | 0.30882 |
| STM4224                                                                                                  | yjbG      | putative periplasmic protein                   | 1.23                                                                               | 0.04436 | -1.03                                                                               | 0.17115 | -0.83                                                                               | 0.26427 |
| STM4224                                                                                                  | yjbG      | putative periplasmic protein                   | 1.65                                                                               | 0.02435 | -1.25                                                                               | 0.01713 | 0.18                                                                                | 0.72802 |
| STM4225                                                                                                  | yjbH      | putative outer membrane lipoprotein            | 0.25                                                                               | 0.74962 | 0.15                                                                                | 0.62620 | -0.79                                                                               | 0.22330 |
| STM4225                                                                                                  | yjbH      | putative outer membrane lipoprotein            | 2.32                                                                               | 0.01311 | 0.62                                                                                | 0.11150 | 0.16                                                                                | 0.81438 |
| STM4226                                                                                                  | yjbA      | phosphate-starvation-inducible protein PsiE    | -0.14                                                                              | 0.84241 | -0.44                                                                               | 0.30082 | 0.04                                                                                | 0.93247 |
| STM4226                                                                                                  | yjbA      | phosphate-starvation-inducible protein PsiE    | 0.21                                                                               | 0.71993 | -0.96                                                                               | 0.02356 | -0.20                                                                               | 0.70783 |

**Table S2.** Genome-wide expression of *Salmonella enterica* serovar Typhimurium inside fibroblasts

Intracellular WT 24 h p.i.      Intracellular *phoP* 24 h p.i.      Extracellular WT stationary phase

Relative to WT exponential LB      Relative to *phoP* exponential LB      Relative to WT exponential LB



| Systematic name | Gene    | Product                                            | log2Ratio (M) | p value | log2Ratio (M) | p value | log2Ratio (M) | p value |
|-----------------|---------|----------------------------------------------------|---------------|---------|---------------|---------|---------------|---------|
| STM4227         | malG    | maltose transport protein                          | 0.41          | 0.51518 | -1.46         | 0.00551 | -2.14         | 0.01601 |
| STM4227         | malG    | maltose transport protein                          | 1.04          | 0.19569 | -2.45         | 0.00046 | -0.50         | 0.45561 |
| STM4228         | malF    | maltose transport protein                          | -0.31         | 0.56172 | -0.72         | 0.14317 | -0.52         | 0.47434 |
| STM4228         | malF    | maltose transport protein                          | 0.26          | 0.55026 | -0.67         | 0.08994 | 0.35          | 0.35370 |
| STM4229         | malE    | periplasmic maltose-binding protein                | -0.88         | 0.09172 | -1.50         | 0.00526 | -0.96         | 0.05617 |
| STM4229         | malE    | periplasmic maltose-binding protein                | 0.19          | 0.77338 | -1.79         | 0.00169 | -0.62         | 0.14711 |
| STM4230         | malK    | maltose transport protein/repressor                | -0.55         | 0.44551 | -2.04         | 0.00108 | -1.51         | 0.05629 |
| STM4230         | malK    | maltose transport protein/repressor                | 0.39          | 0.66786 | -1.56         | 0.03074 | -0.56         | 0.42402 |
| STM4231         | lamB    | malto porin precursor                              | -0.74         | 0.35142 | -1.56         | 0.00344 | -1.16         | 0.08164 |
| STM4231         | lamB    | malto porin precursor                              | 0.40          | 0.51167 | -1.30         | 0.01020 | -0.84         | 0.16815 |
| STM4232         | malM    | periplasmic protein precursor                      | -1.73         | 0.01569 | -1.25         | 0.03235 | -0.43         | 0.34388 |
| STM4232         | malM    | periplasmic protein precursor                      | -0.26         | 0.55443 | -1.50         | 0.00580 | 0.19          | 0.65958 |
| STM4233         | ubiC    | chorismate pyruvate lyase                          | -1.47         | 0.03614 | -1.29         | 0.00510 | 0.97          | 0.02859 |
| STM4233         | ubiC    | chorismate pyruvate lyase                          | 0.41          | 0.68735 | -0.96         | 0.01141 | 2.11          | 0.00047 |
| STM4234         | ubiA    | 4-hydroxybenzoate octaprenyltransferase            | -1.17         | 0.06172 | -0.75         | 0.07432 | -0.71         | 0.07703 |
| STM4234         | ubiA    | 4-hydroxybenzoate octaprenyltransferase            | -0.07         | 0.87790 | -0.52         | 0.13723 | 0.35          | 0.34612 |
| STM4235         | plsB    | glycerol-3-phosphate acyltransferase               | -1.47         | 0.04692 | -1.31         | 0.00409 | -1.36         | 0.00646 |
| STM4235         | plsB    | glycerol-3-phosphate acyltransferase               | -0.28         | 0.56186 | -1.08         | 0.01014 | -0.09         | 0.87248 |
| STM4236         | dgkA    | diacylglycerol kinase                              | -0.90         | 0.06241 | -0.93         | 0.02614 | -1.52         | 0.00250 |
| STM4236         | dgkA    | diacylglycerol kinase                              | -0.87         | 0.11147 | -0.65         | 0.05857 | -1.30         | 0.00692 |
| STM4237         | lexA    | LexA repressor                                     | -0.86         | 0.07358 | 0.29          | 0.32666 | -1.18         | 0.03662 |
| STM4237         | lexA    | LexA repressor                                     | 0.63          | 0.23062 | -0.11         | 0.72305 | -0.47         | 0.30170 |
| STM4238         | dinF    | DNA-damage-inducible protein F                     | -0.96         | 0.09569 | 0.66          | 0.06058 | 2.55          | 0.00059 |
| STM4238         | dinF    | DNA-damage-inducible protein F                     | 0.01          | 0.98765 | 0.51          | 0.08698 | 2.53          | 0.00028 |
| STM4240         | yjbJ    | putative cytoplasmic protein                       | 1.11          | 0.04411 | 2.29          | 0.00023 | 8.06          | 0.00001 |
| STM4240         | yjbJ    | putative cytoplasmic protein                       | 1.95          | 0.00884 | 2.22          | 0.00017 | 8.78          | 0.00001 |
| STM4241         | zur     | transcriptional repressor                          | -0.53         | 0.25756 | 0.73          | 0.02943 | 4.22          | 0.00004 |
| STM4241         | zur     | transcriptional repressor                          | 0.15          | 0.73728 | 1.06          | 0.01181 | 4.48          | 0.00003 |
| STM4242         | STM4242 | conjugative transfer protein                       | 1.40          | 0.09078 | 0.28          | 0.43230 | 1.21          | 0.08873 |
| STM4242         | STM4242 | conjugative transfer protein                       | 1.64          | 0.01536 | -0.72         | 0.08366 | 0.72          | 0.13139 |
| STM4243         | yjbN    | hypothetical protein STM4243                       | -1.08         | 0.05945 | 0.19          | 0.60724 | 0.47          | 0.19859 |
| STM4243         | yjbN    | hypothetical protein STM4243                       | -1.02         | 0.11657 | -0.44         | 0.33459 | 0.09          | 0.84292 |
| STM4244         | pspG    | phage shock protein G                              | 0.20          | 0.73277 | 1.08          | 0.01924 | 0.43          | 0.53514 |
| STM4244         | pspG    | phage shock protein G                              | 1.26          | 0.06023 | 1.09          | 0.01316 | 1.30          | 0.01316 |
| STM4245         | qor     | quinone oxidoreductase                             | -0.01         | 0.98806 | 0.53          | 0.15290 | 3.00          | 0.02944 |
| STM4245         | qor     | quinone oxidoreductase                             | 0.86          | 0.11716 | 0.99          | 0.01654 | 1.95          | 0.00168 |
| STM4246         | dnaB    | replicative DNA helicase                           | -1.63         | 0.01796 | -0.69         | 0.03729 | -0.86         | 0.13114 |
| STM4246         | dnaB    | replicative DNA helicase                           | -2.47         | 0.00711 | -1.69         | 0.00657 | -1.16         | 0.06536 |
| STM4247         | alr     | alanine racemase                                   | -0.23         | 0.66255 | 0.34          | 0.24399 | -1.13         | 0.08297 |
| STM4247         | alr     | alanine racemase                                   | 0.08          | 0.93347 | -0.14         | 0.65316 | -0.34         | 0.40859 |
| STM4248         | tyrB    | aspartate aminotransferase                         | 0.56          | 0.32788 | -1.17         | 0.01238 | 0.07          | 0.92717 |
| STM4248         | tyrB    | aspartate aminotransferase                         | 0.64          | 0.26148 | -1.19         | 0.04600 | 1.67          | 0.07296 |
| STM4249         | aphA    | non-specific acid phosphatase/phosphotransferase   | -0.85         | 0.09208 | 0.67          | 0.08115 | -1.67         | 0.00210 |
| STM4249         | aphA    | non-specific acid phosphatase/phosphotransferase   | -0.15         | 0.78321 | 0.71          | 0.08734 | -0.32         | 0.56623 |
| STM4250         | yjbQ    | putative cytoplasmic protein                       | 0.17          | 0.73386 | 1.77          | 0.00222 | 1.39          | 0.00500 |
| STM4250         | yjbQ    | putative cytoplasmic protein                       | 0.51          | 0.28726 | 1.61          | 0.00110 | 2.08          | 0.00181 |
| STM4251         | yjbR    | putative cytoplasmic protein                       | -0.39         | 0.42564 | 1.28          | 0.00717 | 0.22          | 0.69093 |
| STM4251         | yjbR    | putative cytoplasmic protein                       | 0.25          | 0.72774 | 1.00          | 0.01731 | -0.02         | 0.97527 |
| STM4252         | STM4252 | putative inner membrane protein                    | -0.34         | 0.39935 | 1.20          | 0.00427 | 0.15          | 0.69459 |
| STM4252         | STM4252 | putative inner membrane protein                    | 0.37          | 0.49130 | 0.83          | 0.03294 | 0.65          | 0.12985 |
| STM4253         | STM4253 | putative outer membrane lipoprotein                | -0.08         | 0.90669 | -0.48         | 0.18914 | -0.97         | 0.17970 |
| STM4253         | STM4253 | putative outer membrane lipoprotein                | 0.63          | 0.40701 | -0.20         | 0.56695 | -0.25         | 0.68157 |
| STM4254         | uvrA    | excinuclease ABC subunit A                         | -0.85         | 0.07343 | -0.18         | 0.54266 | -1.27         | 0.00594 |
| STM4254         | uvrA    | excinuclease ABC subunit A                         | 1.12          | 0.09643 | -0.19         | 0.69618 | -1.49         | 0.04001 |
| STM4256         | ssb     | single-strand DNA-binding protein                  | -0.72         | 0.51731 | 0.44          | 0.18463 | -1.25         | 0.01403 |
| STM4256         | ssb     | single-strand DNA-binding protein                  | -0.08         | 0.92834 | 0.73          | 0.09194 | -0.25         | 0.55066 |
| STM4258         | STM4258 | putative methyl-accepting chemotaxis protein       | -0.31         | 0.51925 | -1.36         | 0.00173 | -1.24         | 0.01077 |
| STM4258         | STM4258 | putative methyl-accepting chemotaxis protein       | 0.24          | 0.67110 | -1.61         | 0.00503 | -0.30         | 0.51708 |
| STM4259         | STM4259 | putative ABC exporter outer membrane component     | -0.32         | 0.50506 | -1.03         | 0.01839 | -0.72         | 0.13978 |
| STM4259         | STM4259 | putative ABC exporter outer membrane component     | 0.27          | 0.58700 | -1.25         | 0.00290 | -0.89         | 0.19607 |
| STM4260         | STM4260 | predicted cation efflux pump                       | -0.71         | 0.24717 | -0.99         | 0.01622 | -0.74         | 0.48235 |
| STM4260         | STM4260 | predicted cation efflux pump                       | 0.44          | 0.45509 | -1.85         | 0.01444 | -0.14         | 0.85581 |
| STM4261         | STM4261 | putative inner membrane protein                    | -0.50         | 0.32622 | -0.27         | 0.51338 | -0.45         | 0.42883 |
| STM4261         | STM4261 | putative inner membrane protein                    | -0.16         | 0.83116 | 0.38          | 0.38567 | -0.23         | 0.76913 |
| STM4262         | STM4262 | putative ABC-type bacteriocin/lantibiotic exporter | 1.39          | 0.06863 | 0.49          | 0.21555 | -1.20         | 0.04413 |
| STM4262         | STM4262 | putative ABC-type bacteriocin/lantibiotic exporter | 2.65          | 0.00675 | 0.47          | 0.24294 | -0.36         | 0.40182 |
| STM4263         | yjcB    | putative inner membrane protein                    | 0.57          | 0.26597 | 2.18          | 0.00258 | -1.16         | 0.02148 |
| STM4263         | yjcB    | putative inner membrane protein                    | 1.43          | 0.03635 | 1.93          | 0.00329 | -0.48         | 0.26736 |
| STM4264         | yjcC    | putative diguanylate cyclase/phosphodiesterase     | -0.97         | 0.20042 | 0.18          | 0.69471 | -0.06         | 0.93258 |
| STM4264         | yjcC    | putative diguanylate cyclase/phosphodiesterase     | -0.80         | 0.15767 | 0.29          | 0.42986 | -0.71         | 0.08467 |

**Table S2.** Genome-wide expression of *Salmonella enterica* serovar Typhimurium inside fibroblasts

Intracellular WT 24 h p.i.      Intracellular *phoP* 24 h p.i.      Extracellular WT stationary phase

Relative to WT exponential LB      Relative to *phoP* exponential LB      Relative to WT exponential LB



| Systematic name | Gene    | Product                                         | log2Ratio (M) | p value | log2Ratio (M) | p value | log2Ratio (M) | p value |
|-----------------|---------|-------------------------------------------------|---------------|---------|---------------|---------|---------------|---------|
| STM4265         | soxS    | transcriptional activator                       | -1.18         | 0.09548 | 0.82          | 0.03892 | -0.33         | 0.55394 |
| STM4265         | soxS    | transcriptional activator                       | -0.03         | 0.96862 | 0.84          | 0.03316 | 0.57          | 0.44412 |
| STM4266         | soxR    | redox-sensing transcriptional activator         | -0.35         | 0.46353 | 0.42          | 0.14410 | 0.10          | 0.81089 |
| STM4266         | soxR    | redox-sensing transcriptional activator         | -0.39         | 0.39767 | 0.56          | 0.22900 | 0.56          | 0.16150 |
| STM4267         | STM4267 | putative glutathione S-transferase              | -0.55         | 0.45246 | 1.03          | 0.00841 | 0.33          | 0.61153 |
| STM4267         | STM4267 | putative glutathione S-transferase              | 0.71          | 0.38601 | 1.12          | 0.00887 | 1.05          | 0.03777 |
| STM4268         | yjcD    | hypothetical protein STM4268                    | -0.71         | 0.15688 | 0.06          | 0.84144 | -1.31         | 0.00982 |
| STM4268         | yjcD    | hypothetical protein STM4268                    | -0.70         | 0.15801 | 0.07          | 0.83681 | -0.57         | 0.21828 |
| STM4269         | yjcE    | Na/H transport protein                          | 1.37          | 0.06323 | 0.90          | 0.01449 | 1.62          | 0.02918 |
| STM4269         | yjcE    | Na/H transport protein                          | 1.65          | 0.03541 | 0.35          | 0.27141 | 1.21          | 0.07568 |
| STM4270         | STM4270 | putative transcriptional regulator              | -0.99         | 0.20251 | -0.64         | 0.16112 | -1.38         | 0.00402 |
| STM4270         | STM4270 | putative transcriptional regulator              | -0.66         | 0.16332 | -1.28         | 0.04633 | -0.23         | 0.76913 |
| STM4271         | STM4271 | putative inner membrane protein                 | 0.64          | 0.30707 | -1.23         | 0.00874 | 0.36          | 0.45591 |
| STM4271         | STM4271 | putative inner membrane protein                 | 0.76          | 0.10182 | -1.67         | 0.00508 | 1.28          | 0.19392 |
| STM4272         | STM4272 | putative inner membrane protein                 | 0.34          | 0.52405 | -0.47         | 0.15444 | -0.18         | 0.77436 |
| STM4272         | STM4272 | putative inner membrane protein                 | 3.11          | 0.00547 | -0.82         | 0.04425 | 0.07          | 0.85420 |
| STM4273         | actP    | acetate permease                                | -0.42         | 0.50558 | -0.66         | 0.03395 | -0.52         | 0.35231 |
| STM4273         | actP    | acetate permease                                | 1.27          | 0.04517 | 0.22          | 0.53313 | 0.55          | 0.30509 |
| STM4274         | yjch    | putative inner membrane protein                 | 2.27          | 0.11221 | -0.82         | 0.15504 | 0.23          | 0.85675 |
| STM4274         | yjch    | putative inner membrane protein                 | 0.93          | 0.46799 | -1.80         | 0.01061 | 0.96          | 0.21130 |
| STM4275         | acs     | acetyl-coenzyme A synthetase                    | 1.05          | 0.12783 | 3.42          | 0.00004 | 1.73          | 0.00208 |
| STM4275         | acs     | acetyl-coenzyme A synthetase                    | 2.47          | 0.05962 | 3.37          | 0.00012 | 2.26          | 0.00331 |
| STM4277         | nrfA    | nitrite reductase periplasmic cytochrome c552   | 0.19          | 0.73336 | -0.95         | 0.04037 | -0.57         | 0.42685 |
| STM4277         | nrfA    | nitrite reductase periplasmic cytochrome c552   | 1.14          | 0.06709 | -2.14         | 0.00611 | 0.58          | 0.26344 |
| STM4278,S       | nrfB    | formate-dependent nitrite reductase             | 0.12          | 0.79544 | -0.90         | 0.03026 | -0.82         | 0.28232 |
| STM4278,S       | nrfB    | formate-dependent nitrite reductase             | 1.57          | 0.03711 | -1.06         | 0.02972 | -0.53         | 0.27459 |
| STM4279         | nrfC    | putative formate-dependent nitrite reductase    | -0.04         | 0.96122 | -1.01         | 0.05791 | -0.66         | 0.11816 |
| STM4279         | nrfC    | putative formate-dependent nitrite reductase    | 1.55          | 0.02037 | -0.11         | 0.78689 | 0.47          | 0.29003 |
| STM4280         | nrfD    | putative formate-dependent nitrate reductase    | -0.53         | 0.29599 | -1.58         | 0.02799 | -1.52         | 0.06770 |
| STM4280         | nrfD    | putative formate-dependent nitrate reductase    | 1.96          | 0.00849 | -1.55         | 0.00760 | -0.28         | 0.65684 |
| STM4281         | nrfE    | formate-dependent nitrite reductase             | -0.09         | 0.91536 | -2.05         | 0.01542 | -2.17         | 0.01034 |
| STM4281         | nrfE    | formate-dependent nitrite reductase             | 1.73          | 0.23325 | -3.07         | 0.00007 | -1.37         | 0.06416 |
| STM4282         | nrfG    | formate-dependent nitrite reductase component   | -0.79         | 0.17278 | -0.74         | 0.15673 | -1.20         | 0.12813 |
| STM4282         | nrfG    | formate-dependent nitrite reductase component   | 0.10          | 0.90326 | -0.16         | 0.58297 | -1.13         | 0.02854 |
| STM4283         | gltP    | glutamate/aspartate symport protein             | -0.18         | 0.85762 | -0.12         | 0.77119 | -1.11         | 0.02613 |
| STM4283         | gltP    | glutamate/aspartate symport protein             | 0.62          | 0.24636 | -0.49         | 0.11535 | -0.36         | 0.43831 |
| STM4284         | yjcO    | tetratricopeptide repeat protein                | -0.75         | 0.15588 | -0.96         | 0.00808 | -1.27         | 0.06961 |
| STM4284         | yjcO    | tetratricopeptide repeat protein                | -0.47         | 0.37928 | -0.67         | 0.04383 | -1.34         | 0.04209 |
| STM4285         | fdhF    | formate dehydrogenase                           | 0.56          | 0.46644 | 0.13          | 0.70432 | 0.11          | 0.84080 |
| STM4285         | fdhF    | formate dehydrogenase                           | 1.31          | 0.10045 | -0.01         | 0.98160 | 0.88          | 0.17455 |
| STM4286         | lpxO    | putative dioxygenase                            | 0.84          | 0.48324 | -0.78         | 0.02012 | -1.28         | 0.02896 |
| STM4286         | lpxO    | putative dioxygenase                            | 0.54          | 0.76912 | -0.71         | 0.13679 | -0.53         | 0.54835 |
| STM4287,S       | phnO    | putative regulatory protein                     | -1.09         | 0.14622 | -0.57         | 0.33467 | -0.56         | 0.56340 |
| STM4287,S       | phnO    | putative regulatory protein                     | 0.38          | 0.50915 | -0.29         | 0.56428 | 0.16          | 0.77764 |
| STM4288         | phnB    | putative cytoplasmic protein                    | -0.87         | 0.13459 | -0.08         | 0.80980 | 0.77          | 0.03940 |
| STM4288         | phnB    | putative cytoplasmic protein                    | 1.02          | 0.06446 | 0.48          | 0.14850 | 2.09          | 0.00087 |
| STM4289         | phnA    | putative alkylphosphonate uptake protein        | -0.83         | 0.08480 | 0.23          | 0.59002 | -0.44         | 0.27394 |
| STM4289         | phnA    | putative alkylphosphonate uptake protein        | -0.23         | 0.74878 | 0.28          | 0.43230 | 0.18          | 0.62168 |
| STM4290         | proP    | low-affinity proline transporter                | -0.64         | 0.28940 | 0.60          | 0.10525 | -0.17         | 0.74904 |
| STM4290         | proP    | low-affinity proline transporter                | -0.27         | 0.55411 | 0.20          | 0.62607 | 0.79          | 0.10838 |
| STM4291         | basS    | sensor kinase                                   | -0.67         | 0.15625 | 0.15          | 0.65536 | -1.02         | 0.04422 |
| STM4291         | basS    | sensor kinase                                   | -0.15         | 0.75318 | 1.22          | 0.07248 | -0.31         | 0.46740 |
| STM4292         | basR    | response regulator                              | -1.81         | 0.01028 | -0.67         | 0.10082 | -1.25         | 0.01053 |
| STM4292         | basR    | response regulator                              | -0.15         | 0.73509 | -0.51         | 0.20601 | -0.98         | 0.04692 |
| STM4293         | yjdB    | putative integral membrane protein              | -1.07         | 0.08755 | 0.99          | 0.06209 | -1.88         | 0.00125 |
| STM4293         | yjdB    | putative integral membrane protein              | 0.02          | 0.97265 | 1.28          | 0.00516 | -0.94         | 0.03347 |
| STM4294         | yjdB    | putative putrescine/ornithine transport protein | -0.97         | 0.16933 | 0.61          | 0.21404 | -0.78         | 0.09703 |
| STM4294         | yjdB    | putative putrescine/ornithine transport protein | 0.00          | 0.99621 | 0.60          | 0.15392 | -0.35         | 0.40067 |
| STM4295         | adiY    | transcriptional activator                       | 0.35          | 0.58469 | 0.22          | 0.63045 | -0.88         | 0.09937 |
| STM4295         | adiY    | transcriptional activator                       | 1.35          | 0.05345 | 0.12          | 0.78422 | -0.12         | 0.77687 |
| STM4296         | adi     | catabolic arginine decarboxylase                | -0.56         | 0.21537 | 0.38          | 0.36784 | -0.10         | 0.80762 |
| STM4296         | adi     | catabolic arginine decarboxylase                | 0.98          | 0.30297 | 0.14          | 0.68780 | 0.67          | 0.17121 |
| STM4297         | melR    | melibiose operon regulator                      | -0.61         | 0.58361 | -0.14         | 0.74912 | 0.87          | 0.29940 |
| STM4297         | melR    | melibiose operon regulator                      | 0.36          | 0.69114 | -1.22         | 0.00631 | -0.27         | 0.86615 |
| STM4298         | melA    | alpha-galactosidase                             | -0.60         | 0.36052 | -0.44         | 0.25199 | -0.80         | 0.10351 |
| STM4298         | melA    | alpha-galactosidase                             | 0.25          | 0.73458 | -1.46         | 0.01177 | -0.82         | 0.20084 |
| STM4299         | melB    | melibiose permease II                           | -0.59         | 0.28111 | -0.14         | 0.81329 | -0.73         | 0.09215 |
| STM4299         | melB    | melibiose permease II                           | 1.31          | 0.23493 | -1.31         | 0.00197 | -0.91         | 0.07596 |
| STM4300         | fumB    | fumarase B                                      | -0.36         | 0.84418 | -0.10         | 0.79398 | -0.42         | 0.30322 |
| STM4300         | fumB    | fumarase B                                      | 0.80          | 0.59302 | 0.55          | 0.14047 | 0.19          | 0.75058 |

**Table S2.** Genome-wide expression of *Salmonella enterica* serovar Typhimurium inside fibroblasts

|                 |           |                                                          | Intracellular WT<br>24 h p.i.                                                      |         | Intracellular <i>phoP</i><br>24 h p.i.                                              |         | Extracellular WT<br>stationary phase                                                |         |
|-----------------|-----------|----------------------------------------------------------|------------------------------------------------------------------------------------|---------|-------------------------------------------------------------------------------------|---------|-------------------------------------------------------------------------------------|---------|
|                 |           |                                                          | Relative to WT<br>exponential LB                                                   |         | Relative to <i>phoP</i><br>exponential LB                                           |         | Relative to WT<br>exponential LB                                                    |         |
|                 |           |                                                          |  |         |  |         |  |         |
| Systematic name | Gene      | Product                                                  | log2Ratio (M)                                                                      | p value | log2Ratio (M)                                                                       | p value | log2Ratio (M)                                                                       | p value |
| STM4301         | dcuB      | anaerobic C4-dicarboxylate transporter                   | -0.41                                                                              | 0.55541 | -0.64                                                                               | 0.16752 | -0.61                                                                               | 0.14242 |
| STM4301         | dcuB      | anaerobic C4-dicarboxylate transporter                   | -0.30                                                                              | 0.76483 | -0.92                                                                               | 0.08914 | -0.32                                                                               | 0.53265 |
| STM4302         | STM4302   | putative cytoplasmic protein                             | 0.06                                                                               | 0.91430 | 0.77                                                                                | 0.11555 | 1.82                                                                                | 0.16572 |
| STM4302         | STM4302   | putative cytoplasmic protein                             | 1.51                                                                               | 0.02002 | -1.27                                                                               | 0.01027 | 1.55                                                                                | 0.20972 |
| STM4303         | dcuR      | response regulator                                       | -1.23                                                                              | 0.07432 | 0.61                                                                                | 0.62159 | 0.10                                                                                | 0.79830 |
| STM4303         | dcuR      | response regulator                                       | 0.29                                                                               | 0.89481 | -1.64                                                                               | 0.11656 | -2.66                                                                               | 0.00188 |
| STM4304         | dcuS      | sensory histidine kinase                                 | -1.58                                                                              | 0.03996 | 0.13                                                                                | 0.66864 | -0.46                                                                               | 0.24501 |
| STM4304         | dcuS      | sensory histidine kinase                                 | -1.22                                                                              | 0.03639 | -0.65                                                                               | 0.12443 | -0.92                                                                               | 0.07481 |
| STM4305,S       | STM4305,S | putative anaerobic dimethylsulfoxide reductase subunit A | 0.34                                                                               | 0.55541 | 1.65                                                                                | 0.02138 | -0.01                                                                               | 0.99449 |
| STM4305,S       | STM4305,S | putative anaerobic dimethylsulfoxide reductase subunit A | 0.67                                                                               | 0.44031 | -0.92                                                                               | 0.03640 | 0.04                                                                                | 0.95985 |
| STM4306         | STM4306   | putative anaerobic dimethylsulfoxide reductase subunit B | 1.03                                                                               | 0.11427 | -0.84                                                                               | 0.04983 | -0.62                                                                               | 0.31552 |
| STM4306         | STM4306   | putative anaerobic dimethylsulfoxide reductase subunit B | 1.88                                                                               | 0.02885 | -1.76                                                                               | 0.00185 | 1.11                                                                                | 0.04519 |
| STM4307         | STM4307   | putative anaerobic dimethylsulfoxide reductase subunit C | -0.34                                                                              | 0.71703 | -0.56                                                                               | 0.14320 | -1.49                                                                               | 0.09521 |
| STM4307         | STM4307   | putative anaerobic dimethylsulfoxide reductase subunit C | 1.40                                                                               | 0.19982 | -0.65                                                                               | 0.14373 | -0.68                                                                               | 0.16781 |
| STM4308         | STM4308   | putative anaerobic dehydrogenase component               | -0.41                                                                              | 0.59547 | -0.62                                                                               | 0.34660 | -0.75                                                                               | 0.22235 |
| STM4308         | STM4308   | putative anaerobic dehydrogenase component               | 0.41                                                                               | 0.49844 | -0.62                                                                               | 0.11417 | -0.38                                                                               | 0.41179 |
| STM4309         | STM4309   | hypothetical protein STM4309                             | 1.42                                                                               | 0.04345 | 0.13                                                                                | 0.71408 | 0.91                                                                                | 0.09368 |
| STM4309         | STM4309   | hypothetical protein STM4309                             | 1.63                                                                               | 0.01813 | -0.18                                                                               | 0.75972 | 1.76                                                                                | 0.00651 |
| STM4310         | STM4310   | putative inner membrane protein                          | 2.31                                                                               | 0.01622 | 0.12                                                                                | 0.74224 | 0.91                                                                                | 0.21540 |
| STM4310         | STM4310   | putative inner membrane protein                          | 1.73                                                                               | 0.23216 | -0.33                                                                               | 0.67411 | 1.54                                                                                | 0.01104 |
| STM4312         | STM4312   | hypothetical protein STM4312                             | 0.41                                                                               | 0.66616 | 0.65                                                                                | 0.35712 | 1.53                                                                                | 0.03663 |
| STM4312         | STM4312   | hypothetical protein STM4312                             | 1.25                                                                               | 0.03223 | 1.19                                                                                | 0.08757 | 1.21                                                                                | 0.02349 |
| STM4313         | STM4313   | putative cytoplasmic protein                             | -0.20                                                                              | 0.72562 | 0.20                                                                                | 0.69504 | 1.49                                                                                | 0.01329 |
| STM4313         | STM4313   | putative cytoplasmic protein                             | 0.82                                                                               | 0.25745 | 0.99                                                                                | 0.34689 | 1.26                                                                                | 0.08837 |
| STM4314         | STM4314   | putative regulatory protein                              | -1.29                                                                              | 0.07722 | 0.64                                                                                | 0.34970 | -0.45                                                                               | 0.28459 |
| STM4314         | STM4314   | putative regulatory protein                              | 0.09                                                                               | 0.91750 | 0.45                                                                                | 0.23925 | -0.18                                                                               | 0.73248 |
| STM4315         | STM4315   | putative DNA-binding protein                             | 1.60                                                                               | 0.04695 | -1.10                                                                               | 0.01365 | 1.50                                                                                | 0.01746 |
| STM4315         | STM4315   | putative DNA-binding protein                             | 1.91                                                                               | 0.02827 | -1.42                                                                               | 0.00571 | 2.92                                                                                | 0.00155 |
| STM4317         | STM4317   | hypothetical protein STM4317                             | 0.65                                                                               | 0.23260 | 1.44                                                                                | 0.00185 | -0.95                                                                               | 0.02326 |
| STM4317         | STM4317   | hypothetical protein STM4317                             | 1.28                                                                               | 0.14108 | 1.39                                                                                | 0.01081 | 0.26                                                                                | 0.67159 |
| STM4318         | STM4318   | putative acetyltransferase                               | -0.10                                                                              | 0.90149 | 0.94                                                                                | 0.01456 | 0.23                                                                                | 0.72716 |
| STM4318         | STM4318   | putative acetyltransferase                               | 0.78                                                                               | 0.11865 | 0.31                                                                                | 0.33852 | -0.84                                                                               | 0.11181 |
| STM4319         | phoN      | non-specific acid phosphatase                            | 2.41                                                                               | 0.01072 | 0.82                                                                                | 0.02637 | 0.00                                                                                | 0.99925 |
| STM4319         | phoN      | non-specific acid phosphatase                            | 3.43                                                                               | 0.00512 | 0.55                                                                                | 0.08740 | 1.04                                                                                | 0.01823 |
| STM4321         | pheR      | STM4321                                                  | -1.67                                                                              | 0.02143 | 0.06                                                                                | 0.96541 | 3.37                                                                                | 0.00069 |
| STM4321         | pheR      | STM4321                                                  | -0.67                                                                              | 0.66016 | -1.65                                                                               | 0.00349 | 3.61                                                                                | 0.00032 |
| STM4322         | yjdC      | putative regulatory protein                              | -0.55                                                                              | 0.19546 | -0.31                                                                               | 0.35583 | -0.32                                                                               | 0.40873 |
| STM4322         | yjdC      | putative regulatory protein                              | 0.96                                                                               | 0.08505 | 0.17                                                                                | 0.64628 | 0.20                                                                                | 0.67714 |
| STM4323         | dsbD      | thiol:disulfide interchange protein precursor            | -1.26                                                                              | 0.07763 | 0.00                                                                                | 0.99809 | -1.40                                                                               | 0.00515 |
| STM4323         | dsbD      | thiol:disulfide interchange protein precursor            | 0.33                                                                               | 0.59340 | 0.52                                                                                | 0.16340 | -0.89                                                                               | 0.04161 |
| STM4324         | cutA      | putative periplasmic divalent cation tolerance protein   | 1.29                                                                               | 0.24404 | 0.12                                                                                | 0.70053 | -0.77                                                                               | 0.12977 |
| STM4324         | cutA      | putative periplasmic divalent cation tolerance protein   | 1.69                                                                               | 0.18155 | 0.02                                                                                | 0.96010 | 1.26                                                                                | 0.06361 |
| STM4325         | dcuA      | anaerobic C4-dicarboxylate transporter                   | -0.12                                                                              | 0.76848 | -0.29                                                                               | 0.47413 | 0.30                                                                                | 0.47297 |
| STM4325         | dcuA      | anaerobic C4-dicarboxylate transporter                   | -0.51                                                                              | 0.30586 | -1.08                                                                               | 0.03399 | -0.29                                                                               | 0.57723 |
| STM4326         | aspA      | aspartate ammonia-lyase                                  | -0.55                                                                              | 0.26560 | 0.77                                                                                | 0.05527 | 0.32                                                                                | 0.41632 |
| STM4326         | aspA      | aspartate ammonia-lyase                                  | -0.25                                                                              | 0.71508 | 0.68                                                                                | 0.04708 | 0.16                                                                                | 0.79124 |
| STM4327         | fxsA      | suppressor of F exclusion of bacteriophage T7            | -2.37                                                                              | 0.02105 | -0.90                                                                               | 0.01657 | -2.39                                                                               | 0.00850 |
| STM4327         | fxsA      | suppressor of F exclusion of bacteriophage T7            | -1.29                                                                              | 0.45278 | -0.67                                                                               | 0.03163 | -0.70                                                                               | 0.07254 |
| STM4328         | yjeH      | putative transporter                                     | -1.67                                                                              | 0.07090 | -0.80                                                                               | 0.02910 | -1.48                                                                               | 0.00431 |
| STM4328         | yjeH      | putative transporter                                     | -0.60                                                                              | 0.71819 | -1.42                                                                               | 0.00848 | -2.43                                                                               | 0.01706 |
| STM4329         | groES     | co-chaperonin GroES                                      | -0.25                                                                              | 0.76102 | 0.87                                                                                | 0.03502 | -3.26                                                                               | 0.00010 |
| STM4329         | groES     | co-chaperonin GroES                                      | 0.16                                                                               | 0.85372 | 0.89                                                                                | 0.03037 | -3.08                                                                               | 0.00021 |
| STM4330         | groEL     | chaperonin GroEL                                         | -1.48                                                                              | 0.02146 | 0.66                                                                                | 0.09251 | -2.41                                                                               | 0.00030 |
| STM4330         | groEL     | chaperonin GroEL                                         | -1.03                                                                              | 0.08218 | 1.32                                                                                | 0.00327 | -3.13                                                                               | 0.00037 |
| STM4331         | yjel      | putative outer membrane lipoprotein                      | -0.92                                                                              | 0.06902 | 0.27                                                                                | 0.35236 | -1.22                                                                               | 0.01049 |
| STM4331         | yjel      | putative outer membrane lipoprotein                      | -0.47                                                                              | 0.27011 | 0.83                                                                                | 0.02524 | -0.71                                                                               | 0.08075 |
| STM4332         | yjeJ      | putative inner membrane protein                          | -1.39                                                                              | 0.02948 | -0.44                                                                               | 0.14211 | -2.51                                                                               | 0.00019 |
| STM4332         | yjeJ      | putative inner membrane protein                          | -0.26                                                                              | 0.55721 | 0.10                                                                                | 0.76711 | -2.26                                                                               | 0.00065 |
| STM4333         | yjeK      | putative aminomutase                                     | -0.24                                                                              | 0.77088 | -0.74                                                                               | 0.07079 | -1.94                                                                               | 0.00130 |
| STM4333         | yjeK      | putative aminomutase                                     | 0.39                                                                               | 0.54239 | -0.82                                                                               | 0.02120 | -1.21                                                                               | 0.01357 |
| STM4334         | efp       | elongation factor P                                      | -2.18                                                                              | 0.01279 | -1.62                                                                               | 0.00077 | -2.65                                                                               | 0.00016 |
| STM4334         | efp       | elongation factor P                                      | -2.31                                                                              | 0.00789 | -1.72                                                                               | 0.00174 | -2.44                                                                               | 0.00034 |
| STM4335         | ecnA      | putative entericidin A precursor                         | -0.97                                                                              | 0.07537 | -1.49                                                                               | 0.00132 | -0.76                                                                               | 0.13400 |
| STM4335         | ecnA      | putative entericidin A precursor                         | 0.09                                                                               | 0.89142 | -2.02                                                                               | 0.00027 | -1.22                                                                               | 0.00974 |
| STM4337         | ecnR      | putative regulatory protein                              | -1.55                                                                              | 0.05238 | -0.55                                                                               | 0.11554 | 0.22                                                                                | 0.56340 |
| STM4337         | ecnR      | putative regulatory protein                              | -1.22                                                                              | 0.04444 | -0.99                                                                               | 0.01864 | 0.07                                                                                | 0.86160 |
| STM4338         | sugE      | putative DMT superfamily transport protein               | -1.46                                                                              | 0.02565 | 0.01                                                                                | 0.98874 | 0.00                                                                                | 0.99729 |
| STM4338         | sugE      | putative DMT superfamily transport protein               | -0.40                                                                              | 0.41243 | -0.11                                                                               | 0.75373 | -0.23                                                                               | 0.59651 |
| STM4339         | bic       | outer membrane lipoprotein precursor                     | -0.12                                                                              | 0.80800 | -0.28                                                                               | 0.45716 | 0.66                                                                                | 0.06913 |
| STM4339         | bic       | outer membrane lipoprotein precursor                     | 1.09                                                                               | 0.03896 | -0.09                                                                               | 0.82890 | 1.73                                                                                | 0.00246 |

**Table S2.** Genome-wide expression of *Salmonella enterica* serovar Typhimurium inside fibroblasts

|                 |         |                                                    | Intracellular WT<br>24 h p.i.                                                      |         | Intracellular <i>phoP</i><br>24 h p.i.                                              |         | Extracellular WT<br>stationary phase                                                |         |
|-----------------|---------|----------------------------------------------------|------------------------------------------------------------------------------------|---------|-------------------------------------------------------------------------------------|---------|-------------------------------------------------------------------------------------|---------|
|                 |         |                                                    | Relative to WT<br>exponential LB                                                   |         | Relative to <i>phoP</i><br>exponential LB                                           |         | Relative to WT<br>exponential LB                                                    |         |
|                 |         |                                                    |  |         |  |         |  |         |
| Systematic name | Gene    | Product                                            | log2Ratio (M)                                                                      | p value | log2Ratio (M)                                                                       | p value | log2Ratio (M)                                                                       | p value |
| STM4340         | frdD    | fumarate reductase subunit D                       | -1.07                                                                              | 0.05094 | -1.13                                                                               | 0.00823 | -1.20                                                                               | 0.01037 |
| STM4340         | frdD    | fumarate reductase subunit D                       | -0.14                                                                              | 0.72937 | -1.08                                                                               | 0.01113 | -0.30                                                                               | 0.42802 |
| STM4341         | frdC    | fumarate reductase subunit C                       | -1.63                                                                              | 0.03447 | -0.94                                                                               | 0.01009 | -0.02                                                                               | 0.96963 |
| STM4341         | frdC    | fumarate reductase subunit C                       | -0.67                                                                              | 0.48816 | -0.44                                                                               | 0.52306 | -0.98                                                                               | 0.16139 |
| STM4342         | frdB    | succinate dehydrogenase                            | -1.37                                                                              | 0.02730 | -1.19                                                                               | 0.02627 | -1.05                                                                               | 0.07270 |
| STM4342         | frdB    | succinate dehydrogenase                            | -0.45                                                                              | 0.48729 | -1.26                                                                               | 0.01245 | -2.71                                                                               | 0.02859 |
| STM4343         | frdA    | fumarate reductase                                 | 0.39                                                                               | 0.65917 | -1.04                                                                               | 0.02828 | -0.30                                                                               | 0.60390 |
| STM4343         | frdA    | fumarate reductase                                 | 1.18                                                                               | 0.11384 | -1.13                                                                               | 0.00536 | 0.41                                                                                | 0.37675 |
| STM4344         | yjeA    | lysyl-tRNA synthetase                              | 2.57                                                                               | 0.40806 | -1.39                                                                               | 0.00494 | -0.27                                                                               | 0.57912 |
| STM4344         | yjeA    | lysyl-tRNA synthetase                              | 0.99                                                                               | 0.32838 | -1.60                                                                               | 0.00176 | 0.04                                                                                | 0.96501 |
| STM4345         | yjeM    | putative amino-acid transport protein              | -1.01                                                                              | 0.18155 | -0.58                                                                               | 0.19139 | -0.94                                                                               | 0.11017 |
| STM4345         | yjeM    | putative amino-acid transport protein              | 0.78                                                                               | 0.13216 | -1.55                                                                               | 0.00303 | -0.57                                                                               | 0.36200 |
| STM4346         | yjeO    | putative inner membrane protein                    | -0.83                                                                              | 0.09932 | -1.15                                                                               | 0.00969 | -1.23                                                                               | 0.03849 |
| STM4346         | yjeO    | putative inner membrane protein                    | 0.23                                                                               | 0.76786 | -1.21                                                                               | 0.00687 | -1.50                                                                               | 0.00677 |
| STM4347         | yjeP    | putative periplasmic binding protein               | -1.08                                                                              | 0.03808 | -1.66                                                                               | 0.00202 | -2.12                                                                               | 0.01645 |
| STM4347         | yjeP    | putative periplasmic binding protein               | 0.57                                                                               | 0.19350 | -1.60                                                                               | 0.00353 | -0.22                                                                               | 0.73248 |
| STM4348         | psd     | phosphatidylserine decarboxylase                   | 0.42                                                                               | 0.63656 | -0.28                                                                               | 0.41512 | -1.58                                                                               | 0.00233 |
| STM4348         | psd     | phosphatidylserine decarboxylase                   | 0.91                                                                               | 0.20138 | -0.54                                                                               | 0.06609 | -0.73                                                                               | 0.10643 |
| STM4349         | yjeQ    | ribosome-associated GTPase                         | -0.81                                                                              | 0.36452 | -1.07                                                                               | 0.00529 | -0.67                                                                               | 0.09517 |
| STM4349         | yjeQ    | ribosome-associated GTPase                         | -1.69                                                                              | 0.02138 | -1.13                                                                               | 0.01440 | -0.86                                                                               | 0.03716 |
| STM4350         | orn     | oligoribonuclease                                  | -0.69                                                                              | 0.20912 | -0.66                                                                               | 0.05619 | -0.80                                                                               | 0.07409 |
| STM4350         | orn     | oligoribonuclease                                  | 0.23                                                                               | 0.63940 | -1.01                                                                               | 0.01006 | -0.55                                                                               | 0.18077 |
| STM4351         | STM4351 | putative arginine-binding periplasmic protein      | -1.35                                                                              | 0.02567 | -0.51                                                                               | 0.22080 | -1.40                                                                               | 0.03772 |
| STM4351         | STM4351 | putative arginine-binding periplasmic protein      | -1.64                                                                              | 0.06801 | -0.75                                                                               | 0.04671 | -2.06                                                                               | 0.00734 |
| STM4352         | glyV    | STM4352                                            | -1.85                                                                              | 0.03678 | -0.70                                                                               | 0.11233 | 0.49                                                                                | 0.33355 |
| STM4352         | glyV    | STM4352                                            | -0.24                                                                              | 0.77158 | 0.12                                                                                | 0.72566 | 0.85                                                                                | 0.04280 |
| STM4353         | glyX    | STM4353                                            | -0.65                                                                              | 0.34889 | -0.40                                                                               | 0.27196 | 0.59                                                                                | 0.15751 |
| STM4353         | glyX    | STM4353                                            | -0.26                                                                              | 0.70958 | -0.03                                                                               | 0.93083 | 0.59                                                                                | 0.10122 |
| STM4354         | glyY    | STM4354                                            | -0.60                                                                              | 0.36425 | -0.12                                                                               | 0.66967 | 0.88                                                                                | 0.06652 |
| STM4354         | glyY    | STM4354                                            | 0.10                                                                               | 0.88044 | -0.01                                                                               | 0.97823 | 1.06                                                                                | 0.01379 |
| STM4355,S       | yjeS    | putative FeS protein                               | -1.51                                                                              | 0.03113 | -0.51                                                                               | 0.10383 | -1.12                                                                               | 0.05170 |
| STM4355,S       | yjeS    | putative FeS protein                               | 0.10                                                                               | 0.86472 | -0.57                                                                               | 0.06736 | -0.65                                                                               | 0.27015 |
| STM4356         | yjeF    | putative sugar kinase                              | 2.63                                                                               | 0.08578 | 0.15                                                                                | 0.70657 | 0.28                                                                                | 0.63740 |
| STM4356         | yjeF    | putative sugar kinase                              | 2.41                                                                               | 0.41383 | 0.19                                                                                | 0.53225 | 1.55                                                                                | 0.36325 |
| STM4357         | yjeE    | putative nucleotide-binding protein                | -1.19                                                                              | 0.03218 | -0.28                                                                               | 0.31803 | -1.26                                                                               | 0.01141 |
| STM4357         | yjeE    | putative nucleotide-binding protein                | -0.88                                                                              | 0.08147 | -0.51                                                                               | 0.11108 | -1.20                                                                               | 0.01629 |
| STM4358         | amiB    | N-acetylmuramoyl-L-alanine amidase II              | -2.49                                                                              | 0.00648 | -0.88                                                                               | 0.06814 | -1.81                                                                               | 0.00119 |
| STM4358         | amiB    | N-acetylmuramoyl-L-alanine amidase II              | -1.52                                                                              | 0.02438 | -0.27                                                                               | 0.48490 | -1.44                                                                               | 0.01520 |
| STM4359         | mutL    | DNA mismatch repair protein                        | -0.04                                                                              | 0.92939 | 1.30                                                                                | 0.01015 | -0.75                                                                               | 0.04791 |
| STM4359         | mutL    | DNA mismatch repair protein                        | 0.09                                                                               | 0.83760 | 1.41                                                                                | 0.00224 | -0.25                                                                               | 0.51902 |
| STM4360         | miaA    | tRNA delta(2)-isopentenylpyrophosphate transferase | -2.57                                                                              | 0.01391 | -0.13                                                                               | 0.78476 | -1.70                                                                               | 0.00213 |
| STM4360         | miaA    | tRNA delta(2)-isopentenylpyrophosphate transferase | -1.48                                                                              | 0.01993 | 0.17                                                                                | 0.58284 | -1.38                                                                               | 0.00925 |
| STM4361         | hfq     | RNA-binding protein Hfq                            | -2.89                                                                              | 0.03111 | -0.72                                                                               | 0.06663 | -2.12                                                                               | 0.00061 |
| STM4361         | hfq     | RNA-binding protein Hfq                            | -1.72                                                                              | 0.01349 | -0.52                                                                               | 0.07625 | -1.94                                                                               | 0.00075 |
| STM4362         | hflX    | putative GTP-ase                                   | -0.93                                                                              | 0.10688 | 0.57                                                                                | 0.13679 | -1.36                                                                               | 0.01049 |
| STM4362         | hflX    | putative GTP-ase                                   | 0.03                                                                               | 0.95398 | 0.76                                                                                | 0.04406 | -0.57                                                                               | 0.21377 |
| STM4363         | hflK    | FtsH modulator                                     | -0.13                                                                              | 0.76773 | 0.58                                                                                | 0.15126 | -2.52                                                                               | 0.00019 |
| STM4363         | hflK    | FtsH modulator                                     | 0.79                                                                               | 0.22394 | 0.90                                                                                | 0.02372 | -2.27                                                                               | 0.00266 |
| STM4364         | hflC    | FtsH modulator                                     | -0.21                                                                              | 0.66101 | 0.67                                                                                | 0.15969 | -2.09                                                                               | 0.00440 |
| STM4364         | hflC    | FtsH modulator                                     | 1.08                                                                               | 0.04903 | 0.56                                                                                | 0.24620 | -1.94                                                                               | 0.00156 |
| STM4365         | yjeT    | putative inner membrane protein                    | -0.91                                                                              | 0.17044 | -0.43                                                                               | 0.18368 | -2.73                                                                               | 0.00043 |
| STM4365         | yjeT    | putative inner membrane protein                    | -0.20                                                                              | 0.71609 | -0.39                                                                               | 0.18095 | -1.56                                                                               | 0.00310 |
| STM4366         | purA    | adenylosuccinate synthetase                        | -1.67                                                                              | 0.01285 | 0.35                                                                                | 0.48159 | -0.63                                                                               | 0.16381 |
| STM4366         | purA    | adenylosuccinate synthetase                        | -1.42                                                                              | 0.07348 | -0.34                                                                               | 0.21332 | -1.60                                                                               | 0.03735 |
| STM4367         | yjeB    | putative negative regulator                        | -1.32                                                                              | 0.07237 | 0.46                                                                                | 0.16574 | -0.20                                                                               | 0.59568 |
| STM4367         | yjeB    | putative negative regulator                        | -0.91                                                                              | 0.06792 | 0.12                                                                                | 0.69024 | -0.04                                                                               | 0.93658 |
| STM4368         | vacB    | putative exoribonuclease                           | 0.39                                                                               | 0.45780 | -0.10                                                                               | 0.79545 | 0.35                                                                                | 0.46118 |
| STM4368         | vacB    | putative exoribonuclease                           | 1.14                                                                               | 0.04437 | -0.01                                                                               | 0.97552 | 0.95                                                                                | 0.12532 |
| STM4369         | yjfh    | putative tRNA/rRNA methyltransferase               | -1.11                                                                              | 0.04515 | -0.60                                                                               | 0.08028 | -0.88                                                                               | 0.03017 |
| STM4369         | yjfh    | putative tRNA/rRNA methyltransferase               | -0.21                                                                              | 0.76637 | -0.52                                                                               | 0.15678 | -0.85                                                                               | 0.05602 |
| STM4370         | yjfl    | putative cytoplasmic protein                       | 0.06                                                                               | 0.95235 | -0.53                                                                               | 0.13185 | -0.53                                                                               | 0.48717 |
| STM4370         | yjfl    | putative cytoplasmic protein                       | -0.21                                                                              | 0.68653 | -1.24                                                                               | 0.02247 | 0.09                                                                                | 0.87818 |
| STM4371         | yjfJ    | putative phage shock protein A                     | 0.68                                                                               | 0.27450 | -1.86                                                                               | 0.02404 | -1.27                                                                               | 0.02305 |
| STM4371         | yjfJ    | putative phage shock protein A                     | 0.37                                                                               | 0.66194 | -1.80                                                                               | 0.07238 | -0.26                                                                               | 0.71030 |
| STM4372         | STM4372 | putative potassium channels                        | 0.52                                                                               | 0.58469 | 0.17                                                                                | 0.56399 | 0.98                                                                                | 0.01701 |
| STM4372         | STM4372 | putative potassium channels                        | 1.59                                                                               | 0.06252 | 0.09                                                                                | 0.76973 | 1.01                                                                                | 0.05935 |
| STM4373         | yjfK    | putative cytoplasmic protein                       | -0.33                                                                              | 0.52859 | 0.28                                                                                | 0.49942 | -0.08                                                                               | 0.84467 |
| STM4373         | yjfK    | putative cytoplasmic protein                       | 1.23                                                                               | 0.07945 | 0.25                                                                                | 0.64790 | -0.33                                                                               | 0.66302 |
| STM4374         | yjfL    | putative inner membrane protein                    | 0.17                                                                               | 0.78589 | -0.13                                                                               | 0.81169 | 0.66                                                                                | 0.18629 |
| STM4374         | yjfL    | putative inner membrane protein                    | 2.29                                                                               | 0.05767 | -0.51                                                                               | 0.20287 | 0.28                                                                                | 0.64753 |

**Table S2.** Genome-wide expression of *Salmonella enterica* serovar Typhimurium inside fibroblasts

|                 |      |                                                              | Intracellular WT<br>24 h p.i.                                                      |         | Intracellular <i>phoP</i><br>24 h p.i.                                              |         | Extracellular WT<br>stationary phase                                                |         |
|-----------------|------|--------------------------------------------------------------|------------------------------------------------------------------------------------|---------|-------------------------------------------------------------------------------------|---------|-------------------------------------------------------------------------------------|---------|
|                 |      |                                                              | Relative to WT<br>exponential LB                                                   |         | Relative to <i>phoP</i><br>exponential LB                                           |         | Relative to WT<br>exponential LB                                                    |         |
|                 |      |                                                              |  |         |  |         |  |         |
| Systematic name | Gene | Product                                                      | log2Ratio (M)                                                                      | p value | log2Ratio (M)                                                                       | p value | log2Ratio (M)                                                                       | p value |
| STM4375         | yjfM | putative inner membrane protein                              | 0.07                                                                               | 0.92872 | 0.41                                                                                | 0.16818 | -1.64                                                                               | 0.00388 |
| STM4375         | yjfM | putative inner membrane protein                              | 1.07                                                                               | 0.11592 | 0.28                                                                                | 0.47621 | 0.02                                                                                | 0.97409 |
| STM4376         | yjfC | putative glutathionylspermidine synthase                     | 0.54                                                                               | 0.45879 | 0.91                                                                                | 0.02145 | 0.17                                                                                | 0.75498 |
| STM4376         | yjfC | putative glutathionylspermidine synthase                     | 0.83                                                                               | 0.26685 | 1.08                                                                                | 0.01605 | 0.45                                                                                | 0.32056 |
| STM4377         | aidB | putative acyl-CoA dehydrogenase                              | 2.47                                                                               | 0.04877 | -1.41                                                                               | 0.00289 | 0.31                                                                                | 0.76104 |
| STM4377         | aidB | putative acyl-CoA dehydrogenase                              | 2.52                                                                               | 0.05964 | -1.96                                                                               | 0.00463 | 1.42                                                                                | 0.17750 |
| STM4378         | yjfn | putative inner membrane protein                              | 1.91                                                                               | 0.05424 | 2.89                                                                                | 0.00005 | 3.74                                                                                | 0.00010 |
| STM4378         | yjfn | putative inner membrane protein                              | 1.32                                                                               | 0.04680 | 2.44                                                                                | 0.00060 | 3.30                                                                                | 0.00012 |
| STM4379         | yjfO | putative lipoprotein                                         | -0.55                                                                              | 0.23414 | 1.18                                                                                | 0.00950 | 2.81                                                                                | 0.00036 |
| STM4379         | yjfO | putative lipoprotein                                         | -0.11                                                                              | 0.82541 | 0.93                                                                                | 0.01508 | 3.03                                                                                | 0.00020 |
| STM4380         | yjfP | putative hydrolase                                           | 0.84                                                                               | 0.10112 | 0.18                                                                                | 0.68360 | -0.35                                                                               | 0.39162 |
| STM4380         | yjfP | putative hydrolase                                           | 0.85                                                                               | 0.14884 | 0.17                                                                                | 0.55224 | 0.38                                                                                | 0.60829 |
| STM4381         | yjfQ | putative transcriptional repressor                           | -1.21                                                                              | 0.17164 | -0.63                                                                               | 0.07419 | -1.61                                                                               | 0.02022 |
| STM4381         | yjfQ | putative transcriptional repressor                           | 0.43                                                                               | 0.43433 | 0.44                                                                                | 0.20307 | -0.55                                                                               | 0.22252 |
| STM4382         | yjfr | putative Zn-dependent hydrolase                              | -0.29                                                                              | 0.50431 | -1.19                                                                               | 0.04088 | -0.68                                                                               | 0.14880 |
| STM4382         | yjfr | putative Zn-dependent hydrolase                              | -0.48                                                                              | 0.44635 | -1.13                                                                               | 0.02721 | -0.15                                                                               | 0.91103 |
| STM4383,S       | ulaA | ascorbate-specific PTS system enzyme IIC                     | 0.28                                                                               | 0.58797 | -1.65                                                                               | 0.00772 | -0.57                                                                               | 0.20443 |
| STM4383,S       | ulaA | ascorbate-specific PTS system enzyme IIC                     | 0.74                                                                               | 0.18694 | -0.71                                                                               | 0.43133 | 0.11                                                                                | 0.89189 |
| STM4384         | sgaB | putative PTS enzyme II                                       | 0.31                                                                               | 0.53299 | 0.58                                                                                | 0.37301 | 0.59                                                                                | 0.55415 |
| STM4384         | sgaB | putative PTS enzyme II                                       | 1.49                                                                               | 0.02838 | -0.09                                                                               | 0.75345 | 1.08                                                                                | 0.04275 |
| STM4385         | ptxA | putative PTS enzyme II                                       | 0.86                                                                               | 0.16770 | -0.31                                                                               | 0.39830 | -0.52                                                                               | 0.45148 |
| STM4385         | ptxA | putative PTS enzyme II                                       | 0.74                                                                               | 0.43590 | -1.43                                                                               | 0.01809 | 0.06                                                                                | 0.93750 |
| STM4386         | sgaH | putative hexulose phosphate synthase                         | 0.54                                                                               | 0.29455 | -1.45                                                                               | 0.03755 | -1.00                                                                               | 0.27629 |
| STM4386         | sgaH | putative hexulose phosphate synthase                         | 0.47                                                                               | 0.59479 | -1.38                                                                               | 0.00987 | -2.12                                                                               | 0.03835 |
| STM4387         | sgaU | putative hexulose-6-phosphate isomerase                      | -0.52                                                                              | 0.35772 | -0.90                                                                               | 0.05480 | -0.97                                                                               | 0.06379 |
| STM4387         | sgaU | putative hexulose-6-phosphate isomerase                      | 1.59                                                                               | 0.10178 | 0.50                                                                                | 0.48785 | 2.57                                                                                | 0.00125 |
| STM4388         | sgaE | L-ribulose-5-phosphate 4-epimerase                           | -2.21                                                                              | 0.00753 | -1.24                                                                               | 0.06264 | -2.74                                                                               | 0.01325 |
| STM4388         | sgaE | L-ribulose-5-phosphate 4-epimerase                           | -2.50                                                                              | 0.01155 | -1.69                                                                               | 0.00143 | -2.19                                                                               | 0.00943 |
| STM4389         | yjfy | putative outer membrane protein                              | -2.38                                                                              | 0.00660 | -1.59                                                                               | 0.00142 | -1.59                                                                               | 0.00802 |
| STM4389         | yjfy | putative outer membrane protein                              | -0.52                                                                              | 0.65219 | -1.47                                                                               | 0.00639 | -1.60                                                                               | 0.00202 |
| STM4391         | rpsF | 30S ribosomal protein S6                                     | -4.51                                                                              | 0.01761 | -2.10                                                                               | 0.00130 | -5.86                                                                               | 0.00021 |
| STM4391         | rpsF | 30S ribosomal protein S6                                     | -4.73                                                                              | 0.02177 | -2.06                                                                               | 0.00018 | -7.68                                                                               | 0.00001 |
| STM4393         | rpsR | 30S ribosomal protein S18                                    | -3.27                                                                              | 0.00795 | -1.59                                                                               | 0.00613 | -4.31                                                                               | 0.00004 |
| STM4393         | rpsR | 30S ribosomal protein S18                                    | -2.01                                                                              | 0.02268 | -1.41                                                                               | 0.00885 | -4.98                                                                               | 0.00002 |
| STM4394         | rpII | 50S ribosomal protein L9                                     | -3.24                                                                              | 0.02532 | -1.28                                                                               | 0.02098 | -4.98                                                                               | 0.00026 |
| STM4394         | rpII | 50S ribosomal protein L9                                     | -2.66                                                                              | 0.00661 | -0.53                                                                               | 0.24878 | -5.00                                                                               | 0.00003 |
| STM4395         | yifZ | putative permease                                            | -0.59                                                                              | 0.20924 | -1.02                                                                               | 0.02845 | -1.55                                                                               | 0.00749 |
| STM4395         | yifZ | putative permease                                            | 0.30                                                                               | 0.76409 | -1.05                                                                               | 0.01926 | -1.00                                                                               | 0.02554 |
| STM4396         | ytfB | putative cell envelope opacity-associated protein A          | -0.72                                                                              | 0.21612 | -0.75                                                                               | 0.04526 | -0.24                                                                               | 0.52642 |
| STM4396         | ytfB | putative cell envelope opacity-associated protein A          | -0.19                                                                              | 0.75685 | -0.49                                                                               | 0.13098 | 0.31                                                                                | 0.41123 |
| STM4397         | fkIB | FKBP-type 22KD peptidyl-prolyl cis-trans isomerase           | -1.64                                                                              | 0.01319 | -1.68                                                                               | 0.00128 | -3.74                                                                               | 0.00007 |
| STM4397         | fkIB | FKBP-type 22KD peptidyl-prolyl cis-trans isomerase           | -0.85                                                                              | 0.15091 | -1.89                                                                               | 0.00070 | -2.93                                                                               | 0.00047 |
| STM4398         | cycA | D-alanine/D-serine/glycine transport protein                 | -0.28                                                                              | 0.61990 | 0.69                                                                                | 0.07780 | -0.99                                                                               | 0.08477 |
| STM4398         | cycA | D-alanine/D-serine/glycine transport protein                 | 1.63                                                                               | 0.11370 | 0.87                                                                                | 0.01876 | -0.86                                                                               | 0.08837 |
| STM4399         | ytfE | putative cell morphogenesis protein                          | 0.75                                                                               | 0.21940 | 1.58                                                                                | 0.00273 | -0.12                                                                               | 0.77834 |
| STM4399         | ytfE | putative cell morphogenesis protein                          | 2.16                                                                               | 0.01401 | 1.42                                                                                | 0.00683 | 0.28                                                                                | 0.46740 |
| STM4400         | ytfF | putative cationic amino acid transporter                     | 1.60                                                                               | 0.03453 | 0.34                                                                                | 0.27031 | -0.24                                                                               | 0.54835 |
| STM4400         | ytfF | putative cationic amino acid transporter                     | 1.62                                                                               | 0.08941 | -0.56                                                                               | 0.16967 | 0.21                                                                                | 0.69836 |
| STM4401         | ytfG | putative reductase                                           | 1.11                                                                               | 0.35384 | 0.65                                                                                | 0.08645 | -0.07                                                                               | 0.91566 |
| STM4401         | ytfG | putative reductase                                           | 2.99                                                                               | 0.00780 | -0.97                                                                               | 0.09029 | -0.28                                                                               | 0.78671 |
| STM4402         | ytfH | putative transcriptional regulator                           | 0.63                                                                               | 0.39473 | 0.44                                                                                | 0.16412 | -0.03                                                                               | 0.95290 |
| STM4402         | ytfH | putative transcriptional regulator                           | 0.23                                                                               | 0.65326 | 0.26                                                                                | 0.42051 | 0.45                                                                                | 0.30017 |
| STM4403         | cpdB | 2',3'-cyclic nucleotide 2'-phosphodiesterase/3'-nucleotidase | 1.32                                                                               | 0.49426 | 0.55                                                                                | 0.10127 | 0.58                                                                                | 0.39711 |
| STM4403         | cpdB | 2',3'-cyclic nucleotide 2'-phosphodiesterase/3'-nucleotidase | 0.49                                                                               | 0.40371 | 0.26                                                                                | 0.45719 | 0.53                                                                                | 0.32047 |
| STM4404         | cysQ | sulfite biosynthetic protein                                 | -1.32                                                                              | 0.02464 | 0.30                                                                                | 0.30994 | 1.24                                                                                | 0.00668 |
| STM4404         | cysQ | sulfite biosynthetic protein                                 | -0.17                                                                              | 0.78079 | 0.55                                                                                | 0.10725 | 1.70                                                                                | 0.00264 |
| STM4405         | ytfJ | putative transcriptional regulator                           | -0.05                                                                              | 0.95272 | 0.65                                                                                | 0.07040 | 1.27                                                                                | 0.01578 |
| STM4405         | ytfJ | putative transcriptional regulator                           | 0.25                                                                               | 0.69232 | 0.74                                                                                | 0.05447 | 1.78                                                                                | 0.00129 |
| STM4406,S       | ytfK | putative cytoplasmic protein                                 | 2.32                                                                               | 0.50755 | 0.69                                                                                | 0.29702 | 2.60                                                                                | 0.00314 |
| STM4406,S       | ytfK | putative cytoplasmic protein                                 | -0.41                                                                              | 0.74558 | 1.07                                                                                | 0.00959 | 2.30                                                                                | 0.00784 |
| STM4407         | ytfL | putative hemolysin-like protein                              | -1.07                                                                              | 0.10500 | -0.40                                                                               | 0.18585 | 0.59                                                                                | 0.14409 |
| STM4407         | ytfL | putative hemolysin-like protein                              | 0.48                                                                               | 0.40754 | 0.12                                                                                | 0.72798 | 1.62                                                                                | 0.00484 |
| STM4408         | msrA | methionine sulfoxide reductase A                             | -0.45                                                                              | 0.49835 | 0.63                                                                                | 0.18118 | 0.50                                                                                | 0.39283 |
| STM4408         | msrA | methionine sulfoxide reductase A                             | 0.67                                                                               | 0.18353 | 0.52                                                                                | 0.21528 | 0.69                                                                                | 0.11659 |
| STM4409         | ytfM | putative outer membrane protein                              | -1.34                                                                              | 0.04301 | -0.48                                                                               | 0.21987 | -1.72                                                                               | 0.00732 |
| STM4409         | ytfM | putative outer membrane protein                              | -0.36                                                                              | 0.40544 | -0.18                                                                               | 0.56539 | -0.81                                                                               | 0.07616 |
| STM4410         | ytfN | putative periplasmic protein                                 | -2.56                                                                              | 0.00929 | -0.19                                                                               | 0.61050 | -2.40                                                                               | 0.00020 |
| STM4410         | ytfN | putative periplasmic protein                                 | -1.82                                                                              | 0.01131 | -0.21                                                                               | 0.53844 | -1.91                                                                               | 0.00340 |
| STM4411         | ytfP | putative cytoplasmic protein                                 | -2.28                                                                              | 0.01048 | -0.51                                                                               | 0.12789 | -1.03                                                                               | 0.05849 |
| STM4411         | ytfP | putative cytoplasmic protein                                 | -0.72                                                                              | 0.45200 | -0.21                                                                               | 0.53540 | -1.48                                                                               | 0.00300 |

**Table S2.** Genome-wide expression of *Salmonella enterica* serovar Typhimurium inside fibroblasts

Intracellular WT 24 h.p.i.      Intracellular *phoP* 24 h.p.i.      Extracellular WT stationary phase

Relative to WT exponential LB      Relative to *phoP* exponential LB      Relative to WT exponential LB



| Systematic name | Gene      | Product                                               | log2Ratio (M) | p value | log2Ratio (M) | p value | log2Ratio (M) | p value |
|-----------------|-----------|-------------------------------------------------------|---------------|---------|---------------|---------|---------------|---------|
| STM4412         | STM4412   | putative permease                                     | -0.57         | 0.55858 | -0.72         | 0.04875 | -0.45         | 0.54494 |
| STM4412         | STM4412   | putative permease                                     | 0.96          | 0.15645 | -0.65         | 0.14488 | -0.02         | 0.96883 |
| STM4413         | STM4413   | dihydroorotase                                        | 0.66          | 0.31535 | 1.02          | 0.02314 | 1.37          | 0.06998 |
| STM4413         | STM4413   | dihydroorotase                                        | -0.55         | 0.47667 | -0.16         | 0.73838 | -0.20         | 0.81672 |
| STM4414         | ppa       | inorganic pyrophosphatase                             | -2.62         | 0.00547 | -1.48         | 0.00605 | -1.73         | 0.00131 |
| STM4414         | ppa       | inorganic pyrophosphatase                             | -1.57         | 0.05780 | -0.98         | 0.01248 | -2.04         | 0.00155 |
| STM4415         | fbp       | fructose-1,6-bisphosphatase                           | -2.38         | 0.00704 | -1.08         | 0.01170 | -2.41         | 0.00023 |
| STM4415         | fbp       | fructose-1,6-bisphosphatase                           | -2.05         | 0.01162 | -0.58         | 0.06816 | -1.73         | 0.00808 |
| STM4416         | mpl       | UDP-N-acetylmuramate/L-alanyl-gamma-D-glutamyl-meso-  | -0.16         | 0.79102 | -0.33         | 0.37733 | -1.45         | 0.01057 |
| STM4416         | mpl       | UDP-N-acetylmuramate/L-alanyl-gamma-D-glutamyl-meso-  | 0.04          | 0.95696 | -0.12         | 0.70649 | -0.79         | 0.12058 |
| STM4417         | STM4417   | putative transcriptional regulator                    | 0.05          | 0.91651 | -0.19         | 0.58019 | -0.65         | 0.12186 |
| STM4417         | STM4417   | putative transcriptional regulator                    | 1.42          | 0.02652 | -0.60         | 0.10309 | 0.36          | 0.43627 |
| STM4418         | STM4418   | sugar transporter                                     | 3.13          | 0.00547 | 2.11          | 0.00406 | 4.51          | 0.00008 |
| STM4418         | STM4418   | sugar transporter                                     | 3.24          | 0.00643 | 0.99          | 0.09579 | 4.78          | 0.00002 |
| STM4419         | STM4419   | sugar transporter                                     | 0.75          | 0.19139 | -0.38         | 0.42248 | 0.38          | 0.56843 |
| STM4419         | STM4419   | sugar transporter                                     | 1.41          | 0.02636 | -0.55         | 0.14785 | 1.33          | 0.04039 |
| STM4420         | STM4420   | putative inner membrane protein                       | -0.24         | 0.70070 | 0.00          | 0.99977 | 1.81          | 0.01231 |
| STM4420         | STM4420   | putative inner membrane protein                       | 2.33          | 0.01251 | 0.99          | 0.10599 | 1.02          | 0.08506 |
| STM4421         | STM4421   | putative NAD-dependent aldehyde dehydrogenase         | -0.56         | 0.33069 | 0.17          | 0.62505 | -2.78         | 0.00139 |
| STM4421         | STM4421   | putative NAD-dependent aldehyde dehydrogenase         | 1.76          | 0.05330 | 0.95          | 0.03824 | 0.57          | 0.14325 |
| STM4423         | STM4423   | putative DNA-binding protein                          | 0.00          | 0.99786 | -0.12         | 0.87816 | -0.48         | 0.44311 |
| STM4423         | STM4423   | putative DNA-binding protein                          | 1.71          | 0.11970 | -0.82         | 0.12962 | 2.21          | 0.00166 |
| STM4424,S       | STM4424,S | putative endonuclease                                 | 0.70          | 0.28567 | -0.51         | 0.26924 | 0.97          | 0.22780 |
| STM4424,S       | STM4424,S | putative endonuclease                                 | 2.22          | 0.01869 | 0.45          | 0.15435 | 1.77          | 0.00709 |
| STM4425         | STM4425   | putative dehydrogenase                                | 0.66          | 0.17086 | 0.99          | 0.02012 | -0.07         | 0.89059 |
| STM4425         | STM4425   | putative dehydrogenase                                | 0.51          | 0.39670 | 1.15          | 0.00517 | 0.42          | 0.56340 |
| STM4426         | srfJ      | lysosomal glucosyl ceramidase-like protein            | 0.12          | 0.76451 | 2.31          | 0.00070 | -0.26         | 0.52301 |
| STM4426         | srfJ      | lysosomal glucosyl ceramidase-like protein            | -0.47         | 0.62065 | 2.59          | 0.00016 | 0.04          | 0.96528 |
| STM4427         | STM4427   | putative endonuclease                                 | 1.97          | 0.02765 | 1.21          | 0.01884 | -0.98         | 0.06850 |
| STM4427         | STM4427   | putative endonuclease                                 | 1.73          | 0.02754 | 1.05          | 0.01486 | 1.40          | 0.01135 |
| STM4428         | STM4428   | hypothetical protein STM4428                          | -1.07         | 0.05338 | -0.11         | 0.75927 | -0.68         | 0.22957 |
| STM4428         | STM4428   | hypothetical protein STM4428                          | -0.52         | 0.66787 | -1.57         | 0.00528 | -2.51         | 0.00072 |
| STM4433         | STM4433   | myo-inositol 2-dehydrogenase                          | 1.86          | 0.02605 | -0.78         | 0.38110 | -0.08         | 0.92944 |
| STM4433         | STM4433   | myo-inositol 2-dehydrogenase                          | 2.61          | 0.01503 | -0.26         | 0.62420 | 1.42          | 0.01459 |
| STM4434         | STM4434   | putative permease                                     | -0.27         | 0.59899 | 0.44          | 0.41871 | 0.68          | 0.10727 |
| STM4434         | STM4434   | putative permease                                     | -0.09         | 0.94814 | -1.46         | 0.00718 | 0.15          | 0.72414 |
| STM4435         | STM4435   | putative cytoplasmic protein                          | -0.11         | 0.79237 | -0.03         | 0.94410 | -0.05         | 0.93679 |
| STM4435         | STM4435   | putative cytoplasmic protein                          | 1.12          | 0.06092 | 0.65          | 0.05992 | 0.42          | 0.46599 |
| STM4436         | STM4436   | putative endonuclease                                 | -0.27         | 0.71090 | -0.59         | 0.11525 | -0.34         | 0.47247 |
| STM4436         | STM4436   | putative endonuclease                                 | 0.71          | 0.15772 | -0.46         | 0.11222 | 0.16          | 0.71053 |
| STM4437         | yjgA      | hypothetical protein STM4437                          | -1.09         | 0.12902 | -1.11         | 0.00846 | -0.83         | 0.09888 |
| STM4437         | yjgA      | hypothetical protein STM4437                          | -1.96         | 0.02908 | -0.91         | 0.01564 | -0.77         | 0.16608 |
| STM4438         | pmbA      | putative antibiotic maturation protein                | -2.76         | 0.00932 | -0.63         | 0.04068 | -0.86         | 0.03859 |
| STM4438         | pmbA      | putative antibiotic maturation protein                | -1.53         | 0.08698 | -0.44         | 0.15874 | -0.73         | 0.11052 |
| STM4439         | cybC      | cytochrome b562                                       | 1.47          | 0.15162 | -1.06         | 0.00556 | -2.13         | 0.00100 |
| STM4439         | cybC      | cytochrome b562                                       | 1.75          | 0.14472 | -0.87         | 0.01569 | -1.68         | 0.00562 |
| STM4440         | STM4440   | putative cytoplasmic protein                          | -0.02         | 0.98022 | -0.39         | 0.24138 | 0.83          | 0.41390 |
| STM4440         | STM4440   | putative cytoplasmic protein                          | 0.38          | 0.56314 | -0.29         | 0.42682 | 2.64          | 0.09979 |
| STM4441         | STM4441   | putative cytoplasmic protein                          | -0.21         | 0.73745 | -0.03         | 0.95079 | 1.48          | 0.01940 |
| STM4441         | STM4441   | putative cytoplasmic protein                          | 0.30          | 0.61957 | -0.13         | 0.70440 | 0.39          | 0.38402 |
| STM4442         | STM4442   | putative cytoplasmic protein                          | 0.14          | 0.80816 | -0.62         | 0.12641 | -0.06         | 0.91989 |
| STM4442         | STM4442   | putative cytoplasmic protein                          | 0.88          | 0.16192 | -0.23         | 0.50017 | 0.84          | 0.22702 |
| STM4443         | STM4443   | putative inner membrane protein                       | -0.75         | 0.10900 | -0.16         | 0.69562 | -0.65         | 0.34220 |
| STM4443         | STM4443   | putative inner membrane protein                       | 0.67          | 0.12279 | -0.35         | 0.30610 | 0.54          | 0.11976 |
| STM4444         | STM4444   | putative inner membrane protein                       | -0.04         | 0.96131 | -0.01         | 0.96803 | -0.37         | 0.53139 |
| STM4444         | STM4444   | putative inner membrane protein                       | 0.72          | 0.25763 | -0.48         | 0.17200 | -0.13         | 0.88786 |
| STM4445         | STM4445   | dihydroorotase                                        | 0.51          | 0.46194 | -0.59         | 0.08971 | -0.24         | 0.67086 |
| STM4445         | STM4445   | dihydroorotase                                        | 2.01          | 0.09831 | -1.09         | 0.00836 | 0.83          | 0.30974 |
| STM4446         | STM4446   | putative selenocysteine synthase                      | 0.37          | 0.51492 | 0.24          | 0.57965 | -0.06         | 0.92706 |
| STM4446         | STM4446   | putative selenocysteine synthase                      | 0.45          | 0.44637 | 0.36          | 0.21404 | -0.41         | 0.33458 |
| STM4447         | STM4447   | putative periplasmic protein                          | -0.67         | 0.26164 | 0.24          | 0.68599 | -0.63         | 0.14917 |
| STM4447         | STM4447   | putative periplasmic protein                          | 0.36          | 0.44337 | -1.04         | 0.03226 | 0.31          | 0.43580 |
| STM4448         | STM4448   | putative phosphotransferase system mannitol/fructose- | 0.07          | 0.89154 | -0.63         | 0.04336 | -0.57         | 0.23461 |
| STM4448         | STM4448   | putative phosphotransferase system mannitol/fructose- | 0.88          | 0.08057 | -0.23         | 0.53718 | 0.04          | 0.94554 |
| STM4449         | STM4449   | putative regulatory protein                           | -0.68         | 0.30079 | 0.91          | 0.06015 | -0.14         | 0.81708 |
| STM4449         | STM4449   | putative regulatory protein                           | 0.89          | 0.06825 | 0.50          | 0.27535 | -0.62         | 0.24787 |
| STM4450         | STM4450   | putative inner membrane protein                       | 0.32          | 0.47363 | 0.84          | 0.02517 | 0.40          | 0.28702 |
| STM4450         | STM4450   | putative inner membrane protein                       | 1.11          | 0.35933 | 0.59          | 0.20984 | -0.30         | 0.56516 |
| STM4451         | nrdG      | anaerobic ribonucleotide reductase activating protein | -0.51         | 0.22993 | 0.62          | 0.09737 | -0.48         | 0.47075 |
| STM4451         | nrdG      | anaerobic ribonucleotide reductase activating protein | 0.64          | 0.19900 | 1.11          | 0.00814 | -0.96         | 0.03287 |

**Table S2.** Genome-wide expression of *Salmonella enterica* serovar Typhimurium inside fibroblasts

|                 |            |                                                   | Intracellular WT<br>24 h p.i.                                                      |         | Intracellular <i>phoP</i><br>24 h p.i.                                              |         | Extracellular WT<br>stationary phase                                                |         |
|-----------------|------------|---------------------------------------------------|------------------------------------------------------------------------------------|---------|-------------------------------------------------------------------------------------|---------|-------------------------------------------------------------------------------------|---------|
|                 |            |                                                   | Relative to WT<br>exponential LB                                                   |         | Relative to <i>phoP</i><br>exponential LB                                           |         | Relative to WT<br>exponential LB                                                    |         |
|                 |            |                                                   |  |         |  |         |  |         |
| Systematic name | Gene       | Product                                           | log2Ratio (M)                                                                      | p value | log2Ratio (M)                                                                       | p value | log2Ratio (M)                                                                       | p value |
| STM4452         | nrdD       | anaerobic ribonucleoside triphosphate reductase   | 0.06                                                                               | 0.92334 | 0.86                                                                                | 0.02151 | -0.46                                                                               | 0.19236 |
| STM4452         | nrdD       | anaerobic ribonucleoside triphosphate reductase   | 0.66                                                                               | 0.15082 | 0.71                                                                                | 0.08933 | 1.32                                                                                | 0.00623 |
| STM4452,1N      | STM4452,1N | hypothetical protein STM4452,1N                   | 1.92                                                                               | 0.01655 | 0.43                                                                                | 0.28464 | 2.20                                                                                | 0.01040 |
| STM4452,1N      | STM4452,1N | hypothetical protein STM4452,1N                   | 3.16                                                                               | 0.00541 | 0.64                                                                                | 0.06755 | 3.26                                                                                | 0.00017 |
| STM4453         | treC       | trehalose-6-phosphate hydrolase                   | -2.01                                                                              | 0.02281 | -1.14                                                                               | 0.00742 | -1.93                                                                               | 0.00117 |
| STM4453         | treC       | trehalose-6-phosphate hydrolase                   | 1.01                                                                               | 0.36150 | -0.76                                                                               | 0.01877 | -1.19                                                                               | 0.03224 |
| STM4455         | treR       | trehalose repressor                               | -0.90                                                                              | 0.28978 | -1.19                                                                               | 0.05962 | 0.58                                                                                | 0.39283 |
| STM4455         | treR       | trehalose repressor                               | -0.74                                                                              | 0.13710 | -1.94                                                                               | 0.00261 | -0.07                                                                               | 0.90484 |
| STM4456         | mgtA       | Mg2+ ATPase transporter                           | -0.88                                                                              | 0.08960 | -0.74                                                                               | 0.05804 | -1.20                                                                               | 0.00748 |
| STM4456         | mgtA       | Mg2+ ATPase transporter                           | -0.58                                                                              | 0.18697 | -0.45                                                                               | 0.14971 | -0.90                                                                               | 0.07888 |
| STM4457         | STM4457    | putative transposase                              | -1.00                                                                              | 0.30207 | -0.08                                                                               | 0.89061 | -0.01                                                                               | 0.98607 |
| STM4457         | STM4457    | putative transposase                              | -1.23                                                                              | 0.12157 | -1.03                                                                               | 0.03634 | -1.14                                                                               | 0.13128 |
| STM4458         | yjgF       | putative translation initiation inhibitor         | -2.68                                                                              | 0.01423 | -1.87                                                                               | 0.00070 | -1.93                                                                               | 0.00148 |
| STM4458         | yjgF       | putative translation initiation inhibitor         | -2.09                                                                              | 0.02726 | -1.34                                                                               | 0.01016 | -2.71                                                                               | 0.00036 |
| STM4459         | pyrI       | aspartate carbamoyltransferase regulatory subunit | -1.79                                                                              | 0.01426 | 0.00                                                                                | 0.99456 | -2.25                                                                               | 0.00053 |
| STM4459         | pyrI       | aspartate carbamoyltransferase regulatory subunit | -1.09                                                                              | 0.03729 | 0.18                                                                                | 0.53521 | -1.49                                                                               | 0.00241 |
| STM4460         | pyrB       | aspartate carbamoyltransferase catalytic subunit  | -1.23                                                                              | 0.11961 | -0.35                                                                               | 0.19902 | -1.44                                                                               | 0.05562 |
| STM4460         | pyrB       | aspartate carbamoyltransferase catalytic subunit  | -0.61                                                                              | 0.34597 | 0.04                                                                                | 0.92293 | -1.60                                                                               | 0.00428 |
| STM4463         | STM4463    | putative arginine repressor                       | -0.91                                                                              | 0.08555 | -0.80                                                                               | 0.08492 | -1.30                                                                               | 0.03020 |
| STM4463         | STM4463    | putative arginine repressor                       | 0.35                                                                               | 0.56647 | -0.78                                                                               | 0.02795 | -0.59                                                                               | 0.23556 |
| STM4464         | STM4464    | putative arginine repressor                       | -0.46                                                                              | 0.27957 | -0.57                                                                               | 0.08890 | -1.57                                                                               | 0.01114 |
| STM4464         | STM4464    | putative arginine repressor                       | 1.51                                                                               | 0.07731 | -1.32                                                                               | 0.00424 | -0.60                                                                               | 0.38437 |
| STM4465         | STM4465    | ornithine carbamoyltransferase                    | 0.51                                                                               | 0.58404 | -0.58                                                                               | 0.20316 | -0.15                                                                               | 0.81283 |
| STM4465         | STM4465    | ornithine carbamoyltransferase                    | 3.64                                                                               | 0.00955 | -0.46                                                                               | 0.32576 | 1.22                                                                                | 0.01889 |
| STM4466         | STM4466    | carbamate kinase                                  | 0.62                                                                               | 0.19981 | -2.14                                                                               | 0.04886 | -0.84                                                                               | 0.11769 |
| STM4466         | STM4466    | carbamate kinase                                  | 0.78                                                                               | 0.14460 | -1.17                                                                               | 0.00551 | -0.12                                                                               | 0.84572 |
| STM4467         | STM4467    | arginine deiminase                                | 2.76                                                                               | 0.00901 | 0.45                                                                                | 0.43367 | -0.63                                                                               | 0.27257 |
| STM4467         | STM4467    | arginine deiminase                                | 3.73                                                                               | 0.02948 | -0.50                                                                               | 0.16512 | 0.25                                                                                | 0.61153 |
| STM4468         | yjgK       | putative cytoplasmic protein                      | 0.63                                                                               | 0.38692 | 0.24                                                                                | 0.56650 | -0.35                                                                               | 0.38962 |
| STM4468         | yjgK       | putative cytoplasmic protein                      | 1.49                                                                               | 0.01838 | 0.19                                                                                | 0.69158 | 0.16                                                                                | 0.75966 |
| STM4469         | argI       | ornithine carbamoyltransferase                    | 1.49                                                                               | 0.09629 | 2.38                                                                                | 0.00463 | -0.09                                                                               | 0.93458 |
| STM4469         | argI       | ornithine carbamoyltransferase                    | 1.88                                                                               | 0.02805 | 1.49                                                                                | 0.00453 | 1.20                                                                                | 0.01202 |
| STM4470         | yjgD       | putative cytoplasmic protein                      | -1.18                                                                              | 0.33147 | 0.15                                                                                | 0.60724 | 0.17                                                                                | 0.78401 |
| STM4470         | yjgD       | putative cytoplasmic protein                      | 0.39                                                                               | 0.60472 | -0.44                                                                               | 0.13030 | 0.46                                                                                | 0.28606 |
| STM4471         | miaE       | hydroxylase                                       | -0.23                                                                              | 0.60216 | -0.23                                                                               | 0.58568 | -0.40                                                                               | 0.35726 |
| STM4471         | miaE       | hydroxylase                                       | -0.68                                                                              | 0.27849 | -1.47                                                                               | 0.00325 | -0.50                                                                               | 0.44378 |
| STM4472         | ytgA       | putative inner membrane protein                   | 0.21                                                                               | 0.72232 | -0.33                                                                               | 0.57759 | 2.65                                                                                | 0.03914 |
| STM4472         | ytgA       | putative inner membrane protein                   | 1.01                                                                               | 0.36412 | 0.18                                                                                | 0.70905 | 2.21                                                                                | 0.09822 |
| STM4473         | yjgM       | putative acetyltransferase                        | -0.57                                                                              | 0.18716 | -0.36                                                                               | 0.25402 | -1.23                                                                               | 0.02509 |
| STM4473         | yjgM       | putative acetyltransferase                        | -0.56                                                                              | 0.38065 | -1.06                                                                               | 0.01707 | -0.88                                                                               | 0.10248 |
| STM4474         | yjgN       | putative inner membrane protein                   | 0.47                                                                               | 0.50860 | -0.98                                                                               | 0.01565 | -0.11                                                                               | 0.83277 |
| STM4474         | yjgN       | putative inner membrane protein                   | 0.22                                                                               | 0.82290 | -0.95                                                                               | 0.01497 | -0.09                                                                               | 0.95615 |
| STM4475         | valS       | valyl-tRNA synthetase                             | -1.35                                                                              | 0.09858 | -1.22                                                                               | 0.00574 | -1.63                                                                               | 0.04895 |
| STM4475         | valS       | valyl-tRNA synthetase                             | 0.03                                                                               | 0.96386 | -0.85                                                                               | 0.02232 | -1.39                                                                               | 0.02865 |
| STM4476,S       | holC       | DNA polymerase III subunit chi                    | -2.94                                                                              | 0.01785 | -1.43                                                                               | 0.00118 | -2.19                                                                               | 0.00062 |
| STM4476,S       | holC       | DNA polymerase III subunit chi                    | -1.30                                                                              | 0.02914 | -1.03                                                                               | 0.09507 | -2.28                                                                               | 0.00074 |
| STM4477         | pepA       | leucyl aminopeptidase                             | -4.12                                                                              | 0.00512 | -2.40                                                                               | 0.00036 | -3.28                                                                               | 0.00018 |
| STM4477         | pepA       | leucyl aminopeptidase                             | -4.07                                                                              | 0.00546 | -2.13                                                                               | 0.00075 | -2.70                                                                               | 0.00015 |
| STM4479         | yjgP       | putative permease                                 | -2.20                                                                              | 0.00818 | -0.76                                                                               | 0.02815 | -1.68                                                                               | 0.00589 |
| STM4479         | yjgP       | putative permease                                 | 0.01                                                                               | 0.98746 | -0.90                                                                               | 0.01178 | -1.26                                                                               | 0.01134 |
| STM4480         | yjgQ       | putative permease                                 | -1.47                                                                              | 0.01823 | 0.12                                                                                | 0.92655 | -0.75                                                                               | 0.06952 |
| STM4480         | yjgQ       | putative permease                                 | -1.28                                                                              | 0.04794 | -0.95                                                                               | 0.01024 | -0.87                                                                               | 0.07511 |
| STM4481         | idnR       | L-idonate regulator                               | 0.22                                                                               | 0.80421 | -0.43                                                                               | 0.22222 | -0.70                                                                               | 0.16202 |
| STM4481         | idnR       | L-idonate regulator                               | -0.16                                                                              | 0.81457 | -0.46                                                                               | 0.39828 | -0.71                                                                               | 0.19505 |
| STM4482         | idnT       | L-idonate transport protein                       | -0.89                                                                              | 0.08618 | -0.34                                                                               | 0.74485 | 0.47                                                                                | 0.34137 |
| STM4482         | idnT       | L-idonate transport protein                       | -0.85                                                                              | 0.29367 | -1.06                                                                               | 0.00844 | -1.17                                                                               | 0.08517 |
| STM4483         | idnO       | gluconate 5-dehydrogenase                         | -1.03                                                                              | 0.20636 | 0.34                                                                                | 0.34708 | -0.90                                                                               | 0.08572 |
| STM4483         | idnO       | gluconate 5-dehydrogenase                         | 0.17                                                                               | 0.78300 | -0.34                                                                               | 0.26379 | -0.15                                                                               | 0.74370 |
| STM4484         | idnD       | L-idonate 5-dehydrogenase                         | -0.63                                                                              | 0.27871 | 1.23                                                                                | 0.42529 | -1.36                                                                               | 0.04876 |
| STM4484         | idnD       | L-idonate 5-dehydrogenase                         | 1.33                                                                               | 0.03973 | -1.55                                                                               | 0.00208 | 0.03                                                                                | 0.96029 |
| STM4485         | idnK       | thermosensitive D-gluconate kinase                | -1.18                                                                              | 0.05743 | 0.39                                                                                | 0.62947 | 0.31                                                                                | 0.46326 |
| STM4485         | idnK       | thermosensitive D-gluconate kinase                | -0.20                                                                              | 0.71132 | -0.22                                                                               | 0.54571 | 0.42                                                                                | 0.42103 |
| STM4486         | yjgB       | putative alcohol dehydrogenase                    | -0.24                                                                              | 0.69340 | 1.87                                                                                | 0.00111 | 1.75                                                                                | 0.00327 |
| STM4486         | yjgB       | putative alcohol dehydrogenase                    | 1.08                                                                               | 0.12781 | 2.03                                                                                | 0.00931 | 2.29                                                                                | 0.00348 |
| STM4487         | leuX       | STM4487                                           | -1.62                                                                              | 0.01609 | -0.12                                                                               | 0.78205 | 2.79                                                                                | 0.00056 |
| STM4487         | leuX       | STM4487                                           | -0.58                                                                              | 0.27794 | -0.26                                                                               | 0.50156 | 3.23                                                                                | 0.00022 |
| STM4488         | STM4488    | putative integrase                                | 1.55                                                                               | 0.10141 | -0.32                                                                               | 0.29161 | 1.15                                                                                | 0.03740 |
| STM4488         | STM4488    | putative integrase                                | 3.17                                                                               | 0.01024 | -0.99                                                                               | 0.03370 | 2.72                                                                                | 0.00031 |
| STM4489         | STM4489    | putative DNA helicases                            | -1.30                                                                              | 0.02443 | 0.24                                                                                | 0.47940 | -0.35                                                                               | 0.43454 |
| STM4489         | STM4489    | putative DNA helicases                            | -0.55                                                                              | 0.56833 | 0.21                                                                                | 0.51768 | -0.50                                                                               | 0.40452 |

**Table S2.** Genome-wide expression of *Salmonella enterica* serovar Typhimurium inside fibroblasts

Intracellular WT 24 h p.i.      Intracellular *phoP* 24 h p.i.      Extracellular WT stationary phase

Relative to WT exponential LB      Relative to *phoP* exponential LB      Relative to WT exponential LB



| Systematic name | Gene       | Product                                                 | log2Ratio (M) | p value | log2Ratio (M) | p value | log2Ratio (M) | p value |
|-----------------|------------|---------------------------------------------------------|---------------|---------|---------------|---------|---------------|---------|
| STM4490         | STM4490    | putative restriction endonuclease                       | -0.70         | 0.16266 | 0.16          | 0.59207 | -0.84         | 0.09105 |
| STM4490         | STM4490    | putative restriction endonuclease                       | -0.28         | 0.67668 | 0.35          | 0.25721 | -0.47         | 0.33830 |
| STM4491         | STM4491    | putative ATP-dependent Lon protease                     | -1.22         | 0.06709 | -0.04         | 0.92942 | -0.20         | 0.71092 |
| STM4491         | STM4491    | putative ATP-dependent Lon protease                     | -0.68         | 0.37429 | 0.21          | 0.43148 | -0.49         | 0.25088 |
| STM4492         | STM4492    | putative cytoplasmic protein                            | -0.89         | 0.46047 | -0.56         | 0.07105 | -0.69         | 0.38106 |
| STM4492         | STM4492    | putative cytoplasmic protein                            | -0.54         | 0.23076 | -0.60         | 0.09868 | -1.02         | 0.06317 |
| STM4493         | STM4493    | putative cytoplasmic protein                            | -2.34         | 0.01813 | -1.54         | 0.14679 | -2.29         | 0.01326 |
| STM4493         | STM4493    | putative cytoplasmic protein                            | -2.82         | 0.02197 | -1.42         | 0.00273 | -4.71         | 0.00042 |
| STM4494         | STM4494    | putative ABC-type sugar/spermidine/putrescine transport | -1.37         | 0.08082 | -0.25         | 0.37209 | -0.49         | 0.46838 |
| STM4494         | STM4494    | putative ABC-type sugar/spermidine/putrescine transport | -0.75         | 0.14307 | -0.90         | 0.02737 | -1.03         | 0.03980 |
| STM4495         | STM4495    | putative type II restriction enzyme methylase subunit   | -0.35         | 0.54785 | -1.12         | 0.07345 | -0.87         | 0.14834 |
| STM4495         | STM4495    | putative type II restriction enzyme methylase subunit   | -0.45         | 0.29028 | -1.32         | 0.00447 | -1.15         | 0.05094 |
| STM4496         | STM4496    | putative DNA repair ATPase                              | -1.75         | 0.01490 | -0.98         | 0.01153 | -2.65         | 0.00072 |
| STM4496         | STM4496    | putative DNA repair ATPase                              | -0.13         | 0.76787 | -1.30         | 0.00615 | -1.24         | 0.03631 |
| STM4497         | STM4497    | putative cytoplasmic protein                            | -0.66         | 0.54662 | -1.12         | 0.01326 | 0.22          | 0.82830 |
| STM4497         | STM4497    | putative cytoplasmic protein                            | -2.80         | 0.00766 | -2.32         | 0.00054 | -3.57         | 0.00008 |
| STM4498         | STM4498    | putative inner membrane protein                         | -2.73         | 0.00811 | -1.98         | 0.00059 | -2.65         | 0.00297 |
| STM4498         | STM4498    | putative inner membrane protein                         | -2.07         | 0.01091 | -2.20         | 0.00033 | -2.60         | 0.03088 |
| STM4499         | yeeN       | hypothetical protein STM4499                            | -1.54         | 0.07409 | -0.76         | 0.08260 | -1.25         | 0.00884 |
| STM4499         | yeeN       | hypothetical protein STM4499                            | -1.98         | 0.03206 | -1.15         | 0.00538 | -1.71         | 0.00183 |
| STM4500         | yjhP       | putative SAM-dependent methyltransferase                | 1.08          | 0.12984 | 0.35          | 0.55292 | -0.68         | 0.23362 |
| STM4500         | yjhP       | putative SAM-dependent methyltransferase                | 2.52          | 0.00747 | 0.76          | 0.03519 | 0.58          | 0.22942 |
| STM4501         | STM4501    | putative cytoplasmic protein                            | -0.11         | 0.87190 | -0.30         | 0.42969 | -1.34         | 0.02026 |
| STM4501         | STM4501    | putative cytoplasmic protein                            | 1.32          | 0.09063 | -0.18         | 0.59323 | 0.16          | 0.77578 |
| STM4502         | STM4502    | putative cytoplasmic protein                            | -0.42         | 0.61303 | -0.43         | 0.22658 | -1.12         | 0.12206 |
| STM4502         | STM4502    | putative cytoplasmic protein                            | 1.04          | 0.12316 | 0.14          | 0.73784 | 0.48          | 0.34019 |
| STM4503         | STM4503    | putative inner membrane protein                         | 0.54          | 0.35802 | -0.67         | 0.04038 | -0.23         | 0.66365 |
| STM4503         | STM4503    | putative inner membrane protein                         | 0.33          | 0.71355 | -0.59         | 0.13241 | 0.63          | 0.25087 |
| STM4504         | STM4504    | putative cytoplasmic protein                            | -0.35         | 0.50561 | -0.42         | 0.30986 | -0.37         | 0.40732 |
| STM4504         | STM4504    | putative cytoplasmic protein                            | -0.21         | 0.64857 | 0.91          | 0.43581 | -0.16         | 0.67534 |
| STM4505         | STM4505    | hypothetical protein STM4505                            | -0.72         | 0.18157 | 0.49          | 0.15151 | 0.13          | 0.80148 |
| STM4505         | STM4505    | hypothetical protein STM4505                            | 1.36          | 0.02953 | 0.29          | 0.44901 | 1.51          | 0.00772 |
| STM4506         | STM4506    | putative diene lactone hydrolase                        | -0.48         | 0.58533 | 0.98          | 0.03058 | 0.30          | 0.58446 |
| STM4506         | STM4506    | putative diene lactone hydrolase                        | -0.38         | 0.72686 | 0.18          | 0.71739 | -2.57         | 0.00289 |
| STM4507         | uxuR       | uxu operon transcriptional repressor                    | 0.04          | 0.91878 | 0.01          | 0.97910 | 0.27          | 0.54419 |
| STM4507         | uxuR       | uxu operon transcriptional repressor                    | 2.09          | 0.03082 | 0.21          | 0.49667 | 0.99          | 0.07727 |
| STM4508         | trpS2      | tryptophanyl-tRNA synthetase                            | 0.66          | 0.41036 | 1.16          | 0.04255 | 0.35          | 0.56939 |
| STM4508         | trpS2      | tryptophanyl-tRNA synthetase                            | 1.70          | 0.01186 | 1.17          | 0.00274 | 1.54          | 0.00206 |
| STM4508,1N      | STM4508,1N | hypothetical protein STM4508,1N                         | 0.47          | 0.41805 | 0.04          | 0.94075 | 0.70          | 0.25051 |
| STM4508,1N      | STM4508,1N | hypothetical protein STM4508,1N                         | 0.42          | 0.51924 | 0.22          | 0.59493 | 0.83          | 0.12510 |
| STM4509,S       | STM4509,S  | putative cytoplasmic protein                            | -0.40         | 0.61730 | -1.23         | 0.02149 | 0.33          | 0.61447 |
| STM4509,S       | STM4509,S  | putative cytoplasmic protein                            | 0.59          | 0.17543 | -0.99         | 0.04525 | -0.59         | 0.21048 |
| STM4510         | STM4510    | putative aspartate racemase                             | 0.15          | 0.84395 | 0.08          | 0.79364 | -0.75         | 0.05569 |
| STM4510         | STM4510    | putative aspartate racemase                             | 0.82          | 0.09088 | -0.89         | 0.02010 | 0.44          | 0.42861 |
| STM4511         | yjiE       | putative transcriptional regulator                      | -0.01         | 0.98487 | -0.01         | 0.98374 | -1.40         | 0.04452 |
| STM4511         | yjiE       | putative transcriptional regulator                      | -0.74         | 0.19476 | -1.03         | 0.09077 | -0.23         | 0.80333 |
| STM4512         | iadA       | isoaspartyl dipeptidase                                 | -1.13         | 0.07935 | -0.92         | 0.02411 | -1.98         | 0.01056 |
| STM4512         | iadA       | isoaspartyl dipeptidase                                 | 0.06          | 0.89580 | -1.10         | 0.01965 | -0.18         | 0.64989 |
| STM4513         | yjiG       | putative permease                                       | -0.90         | 0.13699 | -0.79         | 0.10545 | -1.78         | 0.00287 |
| STM4513         | yjiG       | putative permease                                       | -1.93         | 0.06717 | -0.87         | 0.05534 | -1.00         | 0.09460 |
| STM4514,S       | yjiH       | putative inner membrane protein                         | 0.69          | 0.44323 | 0.46          | 0.18770 | 1.69          | 0.02569 |
| STM4514,S       | yjiH       | putative inner membrane protein                         | 1.58          | 0.02729 | -0.93         | 0.16749 | 0.41          | 0.31796 |
| STM4515         | yjiJ       | putative sugar transporter                              | -0.63         | 0.28070 | 0.04          | 0.94477 | -0.40         | 0.42033 |
| STM4515         | yjiJ       | putative sugar transporter                              | 0.19          | 0.70217 | -0.24         | 0.44715 | -0.14         | 0.77368 |
| STM4516         | yjiN       | putative inner membrane protein                         | 0.88          | 0.15034 | -0.57         | 0.07960 | 0.38          | 0.35208 |
| STM4516         | yjiN       | putative inner membrane protein                         | 0.27          | 0.54056 | -1.60         | 0.00136 | 0.81          | 0.14324 |
| STM4517         | yjiO       | putative transport protein                              | -0.43         | 0.49156 | 0.39          | 0.47083 | -0.59         | 0.44769 |
| STM4517         | yjiO       | putative transport protein                              | 0.91          | 0.21565 | -0.02         | 0.95835 | -0.45         | 0.38913 |
| STM4518         | STM4518    | putative inner membrane protein                         | -0.11         | 0.89213 | -0.67         | 0.17657 | 0.55          | 0.41169 |
| STM4518         | STM4518    | putative inner membrane protein                         | -0.21         | 0.75179 | -0.76         | 0.07870 | 0.91          | 0.12410 |
| STM4519         | STM4519    | putative NAD-dependent aldehyde dehydrogenase           | -0.53         | 0.23646 | 0.38          | 0.38822 | 2.47          | 0.00030 |
| STM4519         | STM4519    | putative NAD-dependent aldehyde dehydrogenase           | 0.79          | 0.40785 | 0.59          | 0.10495 | 3.06          | 0.00010 |
| STM4522         | STM4522    | putative inner membrane protein                         | 0.74          | 0.31482 | 1.36          | 0.00570 | 2.43          | 0.00246 |
| STM4522         | STM4522    | putative inner membrane protein                         | 1.68          | 0.00435 | 2.14          | 0.00056 | 4.44          | 0.00021 |
| STM4523         | yjiW       | putative SOS response protein                           | 0.12          | 0.78605 | -0.20         | 0.50910 | 0.63          | 0.14152 |
| STM4523         | yjiW       | putative SOS response protein                           | 0.51          | 0.27339 | -1.33         | 0.01308 | 1.88          | 0.00576 |
| STM4524         | hsdS       | type I restriction enzyme specificity protein           | 1.33          | 0.07149 | -1.09         | 0.02271 | 0.18          | 0.72352 |
| STM4524         | hsdS       | type I restriction enzyme specificity protein           | 2.33          | 0.10533 | -0.94         | 0.01079 | 0.59          | 0.43897 |
| STM4525         | hsdM       | DNA methylase M                                         | -1.09         | 0.19652 | -1.68         | 0.00425 | -2.00         | 0.00119 |
| STM4525         | hsdM       | DNA methylase M                                         | 0.05          | 0.96762 | -2.31         | 0.00075 | -2.39         | 0.00038 |

**Table S2.** Genome-wide expression of *Salmonella enterica* serovar Typhimurium inside fibroblasts

|                 |           |                                                | Intracellular WT<br>24 h p.i.                                                      |         | Intracellular <i>phoP</i><br>24 h p.i.                                              |         | Extracellular WT<br>stationary phase                                                |         |
|-----------------|-----------|------------------------------------------------|------------------------------------------------------------------------------------|---------|-------------------------------------------------------------------------------------|---------|-------------------------------------------------------------------------------------|---------|
|                 |           |                                                | Relative to WT<br>exponential LB                                                   |         | Relative to <i>phoP</i><br>exponential LB                                           |         | Relative to WT<br>exponential LB                                                    |         |
|                 |           |                                                |  |         |  |         |  |         |
| Systematic name | Gene      | Product                                        | log2Ratio (M)                                                                      | p value | log2Ratio (M)                                                                       | p value | log2Ratio (M)                                                                       | p value |
| STM4526         | hsdR      | endonuclease R                                 | -1.09                                                                              | 0.16213 | -1.46                                                                               | 0.00316 | -2.03                                                                               | 0.00096 |
| STM4526         | hsdR      | endonuclease R                                 | -0.04                                                                              | 0.92457 | -1.39                                                                               | 0.00856 | 1.57                                                                                | 0.01514 |
| STM4527         | mrr       | restriction endonuclease                       | -0.44                                                                              | 0.32184 | -0.05                                                                               | 0.88331 | -1.58                                                                               | 0.01034 |
| STM4527         | mrr       | restriction endonuclease                       | 0.19                                                                               | 0.66101 | 0.33                                                                                | 0.47252 | 0.41                                                                                | 0.29099 |
| STM4528         | STM4528   | putative inner membrane protein                | 1.60                                                                               | 0.11374 | 1.55                                                                                | 0.00187 | 1.03                                                                                | 0.08590 |
| STM4528         | STM4528   | putative inner membrane protein                | 1.22                                                                               | 0.05393 | 1.39                                                                                | 0.02907 | 1.70                                                                                | 0.00388 |
| STM4529         | STM4529   | putative cytoplasmic protein                   | 1.20                                                                               | 0.03938 | 1.71                                                                                | 0.00203 | 0.04                                                                                | 0.93102 |
| STM4529         | STM4529   | putative cytoplasmic protein                   | 2.35                                                                               | 0.04252 | 1.84                                                                                | 0.00161 | 1.29                                                                                | 0.01268 |
| STM4530         | yjiA      | putative cobalamin biosynthetic protein        | 0.20                                                                               | 0.90987 | 0.97                                                                                | 0.01793 | 3.69                                                                                | 0.00656 |
| STM4530         | yjiA      | putative cobalamin biosynthetic protein        | 0.11                                                                               | 0.93472 | 1.28                                                                                | 0.13745 | 2.91                                                                                | 0.00021 |
| STM4531         | yjiX      | putative cytoplasmic protein                   | -0.61                                                                              | 0.30207 | 0.33                                                                                | 0.40862 | -0.57                                                                               | 0.25048 |
| STM4531         | yjiX      | putative cytoplasmic protein                   | 0.77                                                                               | 0.13539 | 0.24                                                                                | 0.52479 | -0.30                                                                               | 0.46857 |
| STM4532         | yjiY      | putative carbon starvation protein             | -0.66                                                                              | 0.36449 | -1.38                                                                               | 0.00281 | -1.68                                                                               | 0.01307 |
| STM4532         | yjiY      | putative carbon starvation protein             | 0.42                                                                               | 0.57777 | -0.81                                                                               | 0.01816 | -0.11                                                                               | 0.76437 |
| STM4533         | tsr       | methyl-accepting chemotaxis protein I          | -2.14                                                                              | 0.01146 | -3.64                                                                               | 0.00001 | -3.48                                                                               | 0.00014 |
| STM4533         | tsr       | methyl-accepting chemotaxis protein I          | -1.18                                                                              | 0.04024 | -4.08                                                                               | 0.00003 | -3.17                                                                               | 0.00080 |
| STM4534         | STM4534   | putative transcriptional regulator             | 2.27                                                                               | 0.15459 | 1.01                                                                                | 0.13882 | 4.04                                                                                | 0.00043 |
| STM4534         | STM4534   | putative transcriptional regulator             | 0.95                                                                               | 0.56507 | -1.02                                                                               | 0.22427 | -0.89                                                                               | 0.12941 |
| STM4535         | STM4535   | putative PTS permease                          | 1.75                                                                               | 0.02585 | 0.22                                                                                | 0.81909 | 2.64                                                                                | 0.00092 |
| STM4535         | STM4535   | putative PTS permease                          | 1.64                                                                               | 0.01731 | 1.03                                                                                | 0.04120 | 2.18                                                                                | 0.01355 |
| STM4536         | STM4536   | putative PTS permease                          | 1.87                                                                               | 0.04620 | -0.79                                                                               | 0.05585 | -0.42                                                                               | 0.49988 |
| STM4536         | STM4536   | putative PTS permease                          | 0.86                                                                               | 0.28785 | -2.28                                                                               | 0.00399 | 1.32                                                                                | 0.05852 |
| STM4537         | STM4537   | putative PTS permease                          | 0.42                                                                               | 0.51858 | 0.90                                                                                | 0.01590 | 0.13                                                                                | 0.83010 |
| STM4537         | STM4537   | putative PTS permease                          | 1.23                                                                               | 0.22938 | -1.03                                                                               | 0.10414 | 0.87                                                                                | 0.29544 |
| STM4538         | STM4538   | putative PTS permease                          | -0.65                                                                              | 0.32104 | 0.83                                                                                | 0.05666 | -0.94                                                                               | 0.04274 |
| STM4538         | STM4538   | putative PTS permease                          | 0.50                                                                               | 0.36015 | 0.02                                                                                | 0.94914 | 0.71                                                                                | 0.12583 |
| STM4539         | STM4539   | putative glucosamine-fructose-6-phosphate      | -0.90                                                                              | 0.10271 | 0.43                                                                                | 0.17560 | -0.51                                                                               | 0.20551 |
| STM4539         | STM4539   | putative glucosamine-fructose-6-phosphate      | 0.12                                                                               | 0.80932 | 0.37                                                                                | 0.29161 | 0.19                                                                                | 0.72603 |
| STM4540,S       | STM4540,S | putative glucosamine-fructose-6-phosphate      | -1.14                                                                              | 0.03293 | 0.56                                                                                | 0.06054 | -0.16                                                                               | 0.66848 |
| STM4540,S       | STM4540,S | putative glucosamine-fructose-6-phosphate      | -1.04                                                                              | 0.05158 | 0.16                                                                                | 0.59333 | -0.50                                                                               | 0.30418 |
| STM4541         | mdoB      | phosphoglycerol transferase I                  | -0.39                                                                              | 0.37993 | 0.77                                                                                | 0.02548 | -0.14                                                                               | 0.75282 |
| STM4541         | mdoB      | phosphoglycerol transferase I                  | 0.17                                                                               | 0.69052 | 0.32                                                                                | 0.29952 | -0.10                                                                               | 0.78397 |
| STM4542         | yjiA      | putative outer membrane protein                | 0.18                                                                               | 0.80130 | 0.79                                                                                | 0.04308 | -0.56                                                                               | 0.13379 |
| STM4542         | yjiA      | putative outer membrane protein                | 1.18                                                                               | 0.16904 | 1.05                                                                                | 0.03113 | 0.06                                                                                | 0.89078 |
| STM4543         | dnaC      | DNA replication protein DnaC                   | 0.71                                                                               | 0.38042 | 0.41                                                                                | 0.27622 | -0.89                                                                               | 0.14647 |
| STM4543         | dnaC      | DNA replication protein DnaC                   | 0.69                                                                               | 0.19277 | 0.22                                                                                | 0.56202 | -0.18                                                                               | 0.75154 |
| STM4544         | dnaT      | primosomal protein I                           | -1.65                                                                              | 0.01391 | -0.33                                                                               | 0.25307 | -2.31                                                                               | 0.00121 |
| STM4544         | dnaT      | primosomal protein I                           | -0.75                                                                              | 0.20928 | -0.71                                                                               | 0.07330 | -1.14                                                                               | 0.01723 |
| STM4545         | STM4545   | putative inner membrane protein                | -0.52                                                                              | 0.27378 | -0.72                                                                               | 0.17617 | -0.31                                                                               | 0.62362 |
| STM4545         | STM4545   | putative inner membrane protein                | 0.45                                                                               | 0.43576 | -0.88                                                                               | 0.01574 | -1.02                                                                               | 0.08316 |
| STM4546         | yjiP      | hypothetical protein STM4546                   | -0.76                                                                              | 0.10952 | 0.38                                                                                | 0.34523 | 0.25                                                                                | 0.50795 |
| STM4546         | yjiP      | hypothetical protein STM4546                   | -1.54                                                                              | 0.09359 | -0.93                                                                               | 0.01367 | -0.56                                                                               | 0.30735 |
| STM4547         | yjiQ      | putative transcriptional regulator             | 0.12                                                                               | 0.90146 | 0.71                                                                                | 0.10203 | -0.85                                                                               | 0.27459 |
| STM4547         | yjiQ      | putative transcriptional regulator             | 0.42                                                                               | 0.50971 | 0.77                                                                                | 0.04063 | 0.32                                                                                | 0.59735 |
| STM4548         | bglJ      | bgl operon transcriptional activator           | 0.52                                                                               | 0.25728 | 0.97                                                                                | 0.01100 | -1.64                                                                               | 0.03831 |
| STM4548         | bglJ      | bgl operon transcriptional activator           | 0.58                                                                               | 0.32630 | 1.42                                                                                | 0.00344 | -1.41                                                                               | 0.03000 |
| STM4549         | STM4549   | putative cytoplasmic protein                   | 0.42                                                                               | 0.59119 | 1.03                                                                                | 0.02099 | -0.35                                                                               | 0.34408 |
| STM4549         | STM4549   | putative cytoplasmic protein                   | 0.80                                                                               | 0.11786 | 0.81                                                                                | 0.03622 | -1.21                                                                               | 0.01559 |
| STM4550         | fhuF      | ferric hydroxamate transport protein           | -0.31                                                                              | 0.49184 | 0.86                                                                                | 0.01793 | -0.88                                                                               | 0.04036 |
| STM4550         | fhuF      | ferric hydroxamate transport protein           | 0.66                                                                               | 0.53018 | 0.74                                                                                | 0.06057 | -0.51                                                                               | 0.28325 |
| STM4551         | STM4551   | hypothetical protein STM4551                   | -0.22                                                                              | 0.65238 | 0.94                                                                                | 0.05464 | -0.50                                                                               | 0.22282 |
| STM4551         | STM4551   | hypothetical protein STM4551                   | 2.31                                                                               | 0.19487 | 0.59                                                                                | 0.18819 | 0.32                                                                                | 0.53264 |
| STM4552         | STM4552   | putative inner membrane protein                | 0.17                                                                               | 0.76033 | 2.21                                                                                | 0.00014 | 1.82                                                                                | 0.00188 |
| STM4552         | STM4552   | putative inner membrane protein                | 0.95                                                                               | 0.06717 | 2.47                                                                                | 0.00014 | 2.83                                                                                | 0.00043 |
| STM4553         | leuV      | STM4553                                        | -1.05                                                                              | 0.20025 | -2.11                                                                               | 0.00087 | -0.05                                                                               | 0.90354 |
| STM4553         | leuV      | STM4553                                        | -0.17                                                                              | 0.74672 | -2.19                                                                               | 0.00092 | -0.20                                                                               | 0.66456 |
| STM4554         | leuP      | STM4554                                        | -0.26                                                                              | 0.77318 | -1.71                                                                               | 0.00055 | 0.23                                                                                | 0.59945 |
| STM4554         | leuP      | STM4554                                        | 0.95                                                                               | 0.20082 | -1.65                                                                               | 0.00056 | 0.83                                                                                | 0.04732 |
| STM4555         | leuQ      | STM4555                                        | -1.07                                                                              | 0.07902 | -2.26                                                                               | 0.00268 | -0.53                                                                               | 0.25525 |
| STM4555         | leuQ      | STM4555                                        | -0.83                                                                              | 0.14404 | -2.30                                                                               | 0.00056 | -0.40                                                                               | 0.32607 |
| STM4556         | rsmC      | 16S ribosomal RNA m2G1207 methyltransferase    | -0.93                                                                              | 0.09618 | -1.09                                                                               | 0.00518 | -1.36                                                                               | 0.02158 |
| STM4556         | rsmC      | 16S ribosomal RNA m2G1207 methyltransferase    | -1.23                                                                              | 0.02908 | -0.89                                                                               | 0.05197 | -0.83                                                                               | 0.04207 |
| STM4558         | rimI      | ribosomal-protein-alanine N-acetyltransferase  | -1.36                                                                              | 0.02289 | 0.04                                                                                | 0.90202 | -1.43                                                                               | 0.01054 |
| STM4558         | rimI      | ribosomal-protein-alanine N-acetyltransferase  | 0.12                                                                               | 0.91761 | -0.29                                                                               | 0.31472 | -1.31                                                                               | 0.01831 |
| STM4559,S       | yjiG      | nucleotidase                                   | -2.44                                                                              | 0.00747 | -1.11                                                                               | 0.00528 | -2.06                                                                               | 0.00453 |
| STM4559,S       | yjiG      | nucleotidase                                   | -0.89                                                                              | 0.07511 | -1.03                                                                               | 0.01594 | -2.19                                                                               | 0.01484 |
| STM4560         | prfC      | peptide chain release factor 3                 | -1.36                                                                              | 0.02904 | 0.14                                                                                | 0.62082 | 0.77                                                                                | 0.10427 |
| STM4560         | prfC      | peptide chain release factor 3                 | -1.45                                                                              | 0.02479 | -0.21                                                                               | 0.52471 | -0.14                                                                               | 0.71886 |
| STM4561         | osmY      | hyperosmotically-inducible periplasmic protein | 1.93                                                                               | 0.02823 | 3.95                                                                                | 0.00001 | 5.73                                                                                | 0.00002 |
| STM4561         | osmY      | hyperosmotically-inducible periplasmic protein | 2.21                                                                               | 0.01013 | 4.01                                                                                | 0.00003 | 6.64                                                                                | 0.00002 |

**Table S2.** Genome-wide expression of *Salmonella enterica* serovar Typhimurium inside fibroblasts

Intracellular WT 24 h p.i.      Intracellular *phoP* 24 h p.i.      Extracellular WT stationary phase

Relative to WT exponential LB      Relative to *phoP* exponential LB      Relative to WT exponential LB



| Systematic name | Gene    | Product                                      | log2Ratio (M) | p value | log2Ratio (M) | p value | log2Ratio (M) | p value |
|-----------------|---------|----------------------------------------------|---------------|---------|---------------|---------|---------------|---------|
| STM4562         | STM4562 | putative inner membrane protein              | -0.51         | 0.34388 | 1.41          | 0.00353 | 2.53          | 0.00035 |
| STM4562         | STM4562 | putative inner membrane protein              | 1.53          | 0.09713 | 1.75          | 0.00047 | 3.65          | 0.00009 |
| STM4563         | yjiU    | putative phosphoesterase                     | -0.74         | 0.17783 | -0.22         | 0.58486 | -0.73         | 0.05713 |
| STM4563         | yjiU    | putative phosphoesterase                     | -0.30         | 0.48347 | 0.21          | 0.58853 | -0.31         | 0.50011 |
| STM4564         | yjiV    | putative hydrolase                           | 0.50          | 0.51151 | 0.40          | 0.38752 | 1.44          | 0.13388 |
| STM4564         | yjiV    | putative hydrolase                           | 0.48          | 0.40763 | 0.88          | 0.19798 | 0.66          | 0.25601 |
| STM4565         | yjiW    | pyruvate formate lyase-activating enzyme     | 0.21          | 0.79552 | -0.45         | 0.26173 | -0.01         | 0.97999 |
| STM4565         | yjiW    | pyruvate formate lyase-activating enzyme     | 0.17          | 0.74509 | -0.58         | 0.20552 | 0.42          | 0.61072 |
| STM4566         | yjiI    | putative cytoplasmic protein                 | -0.28         | 0.71423 | -0.50         | 0.17114 | -0.28         | 0.75048 |
| STM4566         | yjiI    | putative cytoplasmic protein                 | 1.27          | 0.16530 | -0.66         | 0.09650 | 1.03          | 0.07184 |
| STM4567         | deoC    | deoxyribose-phosphate aldolase               | -1.08         | 0.05743 | -1.44         | 0.00407 | -2.25         | 0.00093 |
| STM4567         | deoC    | deoxyribose-phosphate aldolase               | 0.13          | 0.84287 | -1.20         | 0.00609 | -1.44         | 0.01221 |
| STM4568         | deoA    | thymidine phosphorylase                      | -3.01         | 0.00686 | -2.30         | 0.00170 | -1.30         | 0.00497 |
| STM4568         | deoA    | thymidine phosphorylase                      | -1.80         | 0.01237 | -1.50         | 0.00478 | -1.26         | 0.00714 |
| STM4569         | deoB    | phosphopentomutase                           | -3.33         | 0.00547 | -1.68         | 0.00116 | -1.11         | 0.03008 |
| STM4569         | deoB    | phosphopentomutase                           | -1.76         | 0.03039 | -1.16         | 0.00864 | -0.90         | 0.10129 |
| STM4570         | deoD    | purine nucleoside phosphorylase              | -2.43         | 0.00650 | -1.36         | 0.09258 | -2.85         | 0.00049 |
| STM4570         | deoD    | purine nucleoside phosphorylase              | -1.13         | 0.05582 | -1.50         | 0.00097 | -1.90         | 0.00159 |
| STM4571         | STM4571 | putative outer membrane protein              | -0.72         | 0.13002 | -1.50         | 0.00265 | -0.98         | 0.09367 |
| STM4571         | STM4571 | putative outer membrane protein              | -0.24         | 0.70460 | -1.40         | 0.00259 | -0.60         | 0.19870 |
| STM4572         | stjB    | putative fimbrial usher protein              | 1.17          | 0.05004 | -0.18         | 0.69710 | 1.49          | 0.04142 |
| STM4572         | stjB    | putative fimbrial usher protein              | 1.09          | 0.04333 | -1.16         | 0.08690 | 1.27          | 0.03277 |
| STM4573         | stjC    | putative fimbrial chaparone                  | -0.49         | 0.41282 | 0.24          | 0.66349 | 1.88          | 0.00848 |
| STM4573         | stjC    | putative fimbrial chaparone                  | 0.00          | 0.99986 | -0.72         | 0.07141 | -0.43         | 0.47000 |
| STM4574         | STM4574 | putative outer membrane protein              | 0.08          | 0.87265 | -0.36         | 0.58303 | -0.30         | 0.37744 |
| STM4574         | STM4574 | putative outer membrane protein              | 0.87          | 0.10480 | 0.56          | 0.20511 | 0.40          | 0.42975 |
| STM4575         | STM4575 | putative outer membrane protein              | -1.20         | 0.05468 | 0.31          | 0.39858 | -0.41         | 0.35514 |
| STM4575         | STM4575 | putative outer membrane protein              | -0.48         | 0.28149 | -0.02         | 0.95492 | 0.72          | 0.09571 |
| STM4576         | lplA    | lipote-protein ligase A                      | -0.81         | 0.23162 | 0.63          | 0.10323 | 0.10          | 0.86645 |
| STM4576         | lplA    | lipote-protein ligase A                      | -0.58         | 0.33225 | -0.62         | 0.11905 | -0.22         | 0.67615 |
| STM4577         | smp     | hypothetical protein STM4577                 | -1.28         | 0.02526 | -0.90         | 0.01539 | -2.15         | 0.00289 |
| STM4577         | smp     | hypothetical protein STM4577                 | 0.04          | 0.94606 | -0.89         | 0.01438 | -1.55         | 0.02364 |
| STM4578         | serB    | 3-phosphoserine phosphatase                  | -1.30         | 0.13494 | -1.50         | 0.00222 | -2.69         | 0.00076 |
| STM4578         | serB    | 3-phosphoserine phosphatase                  | -1.89         | 0.01303 | -1.11         | 0.00828 | -1.76         | 0.00146 |
| STM4579         | radA    | putative ATP-dependent protease              | -1.74         | 0.01211 | -1.13         | 0.00772 | -1.91         | 0.00087 |
| STM4579         | radA    | putative ATP-dependent protease              | -0.36         | 0.74257 | -0.78         | 0.02497 | -1.09         | 0.03950 |
| STM4580,S       | nadR    | nicotinamide-nucleotide adenyllyltransferase | 0.65          | 0.47550 | 0.15          | 0.68778 | 0.18          | 0.83509 |
| STM4580,S       | nadR    | nicotinamide-nucleotide adenyllyltransferase | 2.42          | 0.10737 | -0.29         | 0.39018 | -0.77         | 0.07846 |
| STM4581         | yjiK    | putative transport protein                   | -1.27         | 0.03742 | -0.73         | 0.02607 | -1.06         | 0.03328 |
| STM4581         | yjiK    | putative transport protein                   | -1.04         | 0.15713 | -0.88         | 0.03109 | -0.83         | 0.08296 |
| STM4582         | slt     | soluble lytic murein transglycosylase        | -0.99         | 0.18729 | -1.09         | 0.00529 | -1.27         | 0.01077 |
| STM4582         | slt     | soluble lytic murein transglycosylase        | -0.52         | 0.22999 | -0.85         | 0.03437 | -1.52         | 0.05914 |
| STM4583         | trpR    | Trp operon repressor                         | -1.76         | 0.01545 | -0.11         | 0.72914 | -0.66         | 0.11583 |
| STM4583         | trpR    | Trp operon repressor                         | -0.56         | 0.54664 | -0.16         | 0.55870 | -0.95         | 0.02958 |
| STM4584         | yjiX    | hypothetical protein STM4584                 | -0.70         | 0.22379 | -0.79         | 0.02172 | -1.11         | 0.01698 |
| STM4584         | yjiX    | hypothetical protein STM4584                 | -0.79         | 0.09675 | -1.10         | 0.00592 | -0.13         | 0.73603 |
| STM4585         | gpmB    | phosphoglycerate mutase                      | -1.73         | 0.01479 | -0.67         | 0.03986 | -1.14         | 0.01076 |
| STM4585         | gpmB    | phosphoglycerate mutase                      | -1.71         | 0.01386 | -0.87         | 0.01313 | -1.17         | 0.00732 |
| STM4586         | rob     | transcriptional regulator                    | -0.63         | 0.60678 | -0.34         | 0.45371 | -0.25         | 0.73668 |
| STM4586         | rob     | transcriptional regulator                    | -0.72         | 0.26199 | -0.43         | 0.16658 | -0.82         | 0.06420 |
| STM4587         | creA    | putative periplasmic protein                 | 0.40          | 0.68944 | 0.96          | 0.01997 | -0.66         | 0.11080 |
| STM4587         | creA    | putative periplasmic protein                 | 0.86          | 0.09777 | 1.51          | 0.00083 | -0.05         | 0.92298 |
| STM4588         | creB    | response regulator                           | 0.08          | 0.94601 | -0.02         | 0.94063 | -1.50         | 0.00750 |
| STM4588         | creB    | response regulator                           | 0.39          | 0.53946 | 0.08          | 0.84363 | -1.55         | 0.02542 |
| STM4589         | creC    | sensor kinase                                | -0.04         | 0.93815 | -0.71         | 0.24110 | -0.52         | 0.39251 |
| STM4589         | creC    | sensor kinase                                | -1.68         | 0.14669 | -0.57         | 0.10785 | -0.33         | 0.62275 |
| STM4590         | creD    | colicin E2 tolerance protein                 | -1.16         | 0.07101 | 0.54          | 0.31693 | -1.08         | 0.02939 |
| STM4590         | creD    | colicin E2 tolerance protein                 | 0.30          | 0.52038 | 0.40          | 0.61565 | 0.12          | 0.84355 |
| STM4591         | sthE    | putative major fimbrial subunit              | 0.47          | 0.47919 | -0.71         | 0.24578 | 0.83          | 0.16468 |
| STM4591         | sthE    | putative major fimbrial subunit              | 2.12          | 0.01341 | 0.16          | 0.64424 | 1.01          | 0.03287 |
| STM4592         | sthD    | putative fimbrial subunit                    | -0.60         | 0.35172 | 0.32          | 0.42050 | 1.06          | 0.09376 |
| STM4592         | sthD    | putative fimbrial subunit                    | 0.45          | 0.41430 | -0.39         | 0.52151 | 0.58          | 0.41166 |
| STM4593         | sthB    | putative fimbrial usher protein              | 0.19          | 0.84696 | 0.44          | 0.13690 | 0.38          | 0.57393 |
| STM4593         | sthB    | putative fimbrial usher protein              | 0.68          | 0.24508 | 0.28          | 0.53239 | 0.21          | 0.73530 |
| STM4594         | sthA    | putative fimbrial chaparone                  | -0.57         | 0.33531 | -1.15         | 0.01367 | 4.55          | 0.00026 |
| STM4594         | sthA    | putative fimbrial chaparone                  | 1.38          | 0.03235 | -0.39         | 0.40971 | 4.63          | 0.00049 |
| STM4595         | STM4595 | putative fimbrial chaparone                  | -0.51         | 0.44185 | 0.05          | 0.87789 | -1.13         | 0.03982 |
| STM4595         | STM4595 | putative fimbrial chaparone                  | 1.09          | 0.09989 | -0.46         | 0.36939 | -0.72         | 0.18725 |
| STM4596         | STM4596 | putative inner membrane protein              | -1.18         | 0.03651 | 0.10          | 0.75820 | -0.29         | 0.42642 |
| STM4596         | STM4596 | putative inner membrane protein              | 0.76          | 0.11826 | -0.12         | 0.82352 | 0.79          | 0.07660 |

**Table S2.** Genome-wide expression of *Salmonella enterica* serovar Typhimurium inside fibroblasts

Intracellular WT  
24 h p.i.

Intracellular *phoP*  
24 h p.i.

Extracellular WT  
stationary phase

Relative to WT  
exponential LB

Relative to *phoP*  
exponential LB

Relative to WT  
exponential LB

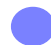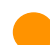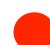

| Systematic name | Gene    | Product                              | log2Ratio (M) | p value | log2Ratio (M) | p value | log2Ratio (M) | p value |
|-----------------|---------|--------------------------------------|---------------|---------|---------------|---------|---------------|---------|
| STM4597         | STM4597 | putative periplasmic protein         | <b>-0.90</b>  | 0.06702 | <b>-0.07</b>  | 0.82550 | <b>-0.67</b>  | 0.33708 |
| STM4597         | STM4597 | putative periplasmic protein         | <b>-1.44</b>  | 0.02864 | <b>-0.26</b>  | 0.41282 | <b>-1.08</b>  | 0.05322 |
| STM4598         | arcA    | response regulator                   | <b>-0.81</b>  | 0.10347 | <b>0.43</b>   | 0.15848 | <b>-0.31</b>  | 0.42081 |
| STM4598         | arcA    | response regulator                   | <b>-0.71</b>  | 0.49101 | <b>0.45</b>   | 0.13807 | <b>0.25</b>   | 0.47818 |
| STM4600         | lasT    | putative tRNA/tRNA methyltransferase | <b>-0.81</b>  | 0.19752 | <b>-0.60</b>  | 0.19090 | <b>-0.85</b>  | 0.10204 |
| STM4600         | lasT    | putative tRNA/tRNA methyltransferase | <b>0.79</b>   | 0.14061 | <b>-0.48</b>  | 0.10392 | <b>0.65</b>   | 0.10518 |

**Table S3. *S. Typhimurium* genes differentially expressed ( $\log_2\text{ratio} \leq -2$  or  $\geq 2$ ) in intracellular WT bacteria compared to exponential LB bacteria**

| Systematic name | Gene    | Product                                              | log2Ratio (M) |
|-----------------|---------|------------------------------------------------------|---------------|
| PSLT006         | repA    | DNA replication protein                              | 3.02          |
| PSLT006         | repA    | DNA replication protein                              | 2.81          |
| PSLT008         | srgC    | putative regulatory protein                          | 3.58          |
| PSLT008         | srgC    | putative regulatory protein                          | 2.32          |
| PSLT010         | srgB    | putative outer membrane protein                      | 3.62          |
| PSLT010         | srgB    | putative outer membrane protein                      | 3.38          |
| PSLT029         | PSLT029 | putative cytoplasmic protein                         | 2.83          |
| PSLT029         | PSLT029 | putative cytoplasmic protein                         | 2.6           |
| PSLT037         | spvD    | hydrophilic protein                                  | 3.85          |
| PSLT037         | spvD    | hydrophilic protein                                  | 3.7           |
| PSLT038         | spvC    | hydrophilic protein                                  | 4.11          |
| PSLT038         | spvC    | hydrophilic protein                                  | 2.24          |
| PSLT040         | spvA    | outer membrane protein                               | 3.52          |
| PSLT040         | spvA    | outer membrane protein                               | 2.09          |
| PSLT043         | PSLT043 | type II secretion system protein                     | 3.56          |
| PSLT043         | PSLT043 | type II secretion system protein                     | 2.49          |
| PSLT045         | PSLT045 | putative resolvase                                   | 3.4           |
| PSLT045         | PSLT045 | putative resolvase                                   | 2.88          |
| PSLT046         | PSLT046 | putative carbonic anhydrase                          | 3.02          |
| PSLT046         | PSLT046 | putative carbonic anhydrase                          | 2.61          |
| PSLT047         | PSLT047 | putative cytoplasmic protein                         | 3.09          |
| PSLT047         | PSLT047 | putative cytoplasmic protein                         | 3.05          |
| PSLT060         | PSLT060 | putative cytoplasmic protein                         | 4.03          |
| PSLT060         | PSLT060 | putative cytoplasmic protein                         | 2.57          |
| PSLT066         | ssbB    | single-strand DNA binding protein                    | 4.19          |
| PSLT066         | ssbB    | single-strand DNA binding protein                    | 3.54          |
| PSLT070         | psiA    | PsiA                                                 | 2.65          |
| PSLT070         | psiA    | PsiA                                                 | 2.27          |
| PSLT072         | PSLT072 | putative transglycosylase                            | 3.67          |
| PSLT072         | PSLT072 | putative transglycosylase                            | 2.33          |
| PSLT073         | traM    | mating signal protein                                | 4.91          |
| PSLT073         | traM    | mating signal protein                                | 4.31          |
| PSLT079         | traE    | pilus assembly protein                               | 2.8           |
| PSLT079         | traE    | pilus assembly protein                               | 2.61          |
| PSLT081         | traB    | pilus assembly protein                               | 2.98          |
| PSLT081         | traB    | pilus assembly protein                               | 2.77          |
| PSLT101         | traG    | mating pair stabilization and pilus assembly protein | 2.73          |
| PSLT101         | traG    | mating pair stabilization and pilus assembly protein | 2.02          |
| PSLT104         | traD    | ATP-binding protein/DNA transporter                  | 4.31          |
| PSLT104         | traD    | ATP-binding protein/DNA transporter                  | 2.87          |
| PSLT106         | PSLT106 | MvpA-like protein                                    | 4.05          |
| PSLT106         | PSLT106 | MvpA-like protein                                    | 2.56          |
| PSLT107         | PSLT107 | putative cytoplasmic protein                         | 4.89          |
| PSLT107         | PSLT107 | putative cytoplasmic protein                         | 4.36          |
| STM0043         | rpsT    | 30S ribosomal protein S20                            | -3.57         |
| STM0043         | rpsT    | 30S ribosomal protein S20                            | -3.16         |
| STM0056         | STM0056 | putative oxaloacetate decarboxylase subunit gamma    | 3.6           |

|            |            |                                                            |       |
|------------|------------|------------------------------------------------------------|-------|
| STM0056    | STM0056    | putative oxaloacetate decarboxylase subunit gamma          | 3.11  |
| STM0091    | pdxA       | 4-hydroxythreonine-4-phosphate dehydrogenase               | -3.52 |
| STM0091    | pdxA       | 4-hydroxythreonine-4-phosphate dehydrogenase               | -3.34 |
| STM0124    | murF       | D-alanine-D-alanine ligase                                 | -2.54 |
| STM0124    | murF       | D-alanine-D-alanine ligase                                 | -2.51 |
| STM0128    | murG       | N-acetylglucosaminyl transferase                           | -2.37 |
| STM0128    | murG       | N-acetylglucosaminyl transferase                           | -2.25 |
| STM0152    | aceE       | pyruvate dehydrogenase E1 component                        | -3.66 |
| STM0152    | aceE       | pyruvate dehydrogenase E1 component                        | -2.30 |
| STM0153    | aceF       | dihydrolipoamide acetyltransferase                         | -2.97 |
| STM0153    | aceF       | dihydrolipoamide acetyltransferase                         | -2.82 |
| STM0154    | lpdA       | dihydrolipoamide dehydrogenase                             | -3.28 |
| STM0154    | lpdA       | dihydrolipoamide dehydrogenase                             | -2.62 |
| STM0166    | speE       | spermidine synthase                                        | -4.00 |
| STM0166    | speE       | spermidine synthase                                        | -3.83 |
| STM0191    | fhuA       | outer membrane ferrichrome receptor protein precursor      | -2.60 |
| STM0191    | fhuA       | outer membrane ferrichrome receptor protein precursor      | -2.24 |
| STM0224    | yaeT       | putative outer membrane protein precursor                  | -3.71 |
| STM0224    | yaeT       | putative outer membrane protein precursor                  | -2.87 |
| STM0225    | hlpA       | outer membrane protein H precursor                         | -4.56 |
| STM0225    | hlpA       | outer membrane protein H precursor                         | -3.82 |
| STM0226    | lpxD       | UDP-3-O-[3-hydroxymyristoyl] glucosamine N-acyltransferase | -2.61 |
| STM0226    | lpxD       | UDP-3-O-[3-hydroxymyristoyl] glucosamine N-acyltransferase | -2.60 |
| STM0230    | rnhB       | ribonuclease HII                                           | -3.24 |
| STM0230    | rnhB       | ribonuclease HII                                           | -2.66 |
| STM0231    | dnaE       | DNA polymerase III subunit alpha                           | -2.46 |
| STM0231    | dnaE       | DNA polymerase III subunit alpha                           | -2.21 |
| STM0252    | rrlH       | STM0252                                                    | -2.35 |
| STM0252    | rrlH       | STM0252                                                    | -2.08 |
| STM0279    | STM0279    | putative cytoplasmic protein                               | 3.46  |
| STM0279    | STM0279    | putative cytoplasmic protein                               | 3.03  |
| STM0294,1N | STM0294,1N | hypothetical protein STM0294,1N                            | 3.33  |
| STM0294,1N | STM0294,1N | hypothetical protein STM0294,1N                            | 3.26  |
| STM0295    | STM0295    | putative cytoplasmic protein                               | 3.9   |
| STM0295    | STM0295    | putative cytoplasmic protein                               | 3.27  |
| STM0339    | stbB       | putative fimbrial chaperone                                | 4.72  |
| STM0339    | stbB       | putative fimbrial chaperone                                | 2.29  |
| STM0406    | yajC       | preprotein translocase subunit YajC                        | -2.93 |
| STM0406    | yajC       | preprotein translocase subunit YajC                        | -2.85 |
| STM0439    | cyoE       | protoheme IX farnesyltransferase                           | -3.45 |
| STM0439    | cyoE       | protoheme IX farnesyltransferase                           | -2.53 |
| STM0440    | cyoD       | cytochrome o ubiquinol oxidase subunit IV                  | -4.68 |
| STM0440    | cyoD       | cytochrome o ubiquinol oxidase subunit IV                  | -4.30 |
| STM0441    | cyoC       | cytochrome o ubiquinol oxidase subunit III                 | -4.01 |
| STM0441    | cyoC       | cytochrome o ubiquinol oxidase subunit III                 | -3.80 |
| STM0442    | cyoB       | cytochrome o ubiquinol oxidase subunit I                   | -3.65 |
| STM0442    | cyoB       | cytochrome o ubiquinol oxidase subunit I                   | -2.67 |
| STM0443    | cyoA       | cytochrome o ubiquinol oxidase subunit II                  | -3.56 |
| STM0443    | cyoA       | cytochrome o ubiquinol oxidase subunit II                  | -2.42 |
| STM0445    | yajG       | putative lipoprotein                                       | -3.46 |
| STM0445    | yajG       | putative lipoprotein                                       | -2.53 |

|           |           |                                                            |       |
|-----------|-----------|------------------------------------------------------------|-------|
| STM0485   | ybaB      | hypothetical protein STM0485                               | -2.82 |
| STM0485   | ybaB      | hypothetical protein STM0485                               | -2.57 |
| STM0486   | recR      | recombination protein RecR                                 | -3.28 |
| STM0486   | recR      | recombination protein RecR                                 | -2.06 |
| STM0494   | ushA      | UDP-sugar hydrolase/5'-nucleotidase                        | 2.51  |
| STM0494   | ushA      | UDP-sugar hydrolase/5'-nucleotidase                        | 2.46  |
| STM0548   | fimF      | putative fimbrial protein                                  | 3.11  |
| STM0548   | fimF      | putative fimbrial protein                                  | 2.93  |
| STM0561   | STM0561   | sensor kinase                                              | 7.72  |
| STM0561   | STM0561   | sensor kinase                                              | 6.16  |
| STM0581   | STM0581   | putative regulatory protein                                | 2.09  |
| STM0581   | STM0581   | putative regulatory protein                                | 2.06  |
| STM0647   | rlpB      | minor lipoprotein                                          | -2.56 |
| STM0647   | rlpB      | minor lipoprotein                                          | -2.20 |
| STM0648   | leuS      | leucyl-tRNA synthetase                                     | -3.44 |
| STM0648   | leuS      | leucyl-tRNA synthetase                                     | -2.22 |
| STM0662   | gltL      | glutamate/aspartate transporter                            | 3.41  |
| STM0662   | gltL      | glutamate/aspartate transporter                            | 3.37  |
| STM0678   | leuW      | STM0678                                                    | -4.65 |
| STM0678   | leuW      | STM0678                                                    | -4.33 |
| STM0679   | metT      | STM0679                                                    | -3.20 |
| STM0679   | metT      | STM0679                                                    | -3.03 |
| STM0688   | ybfN      | putative lipoprotein                                       | 2.36  |
| STM0688   | ybfN      | putative lipoprotein                                       | 2.05  |
| STM0695   | ybfE      | putative SOS response protein                              | -2.56 |
| STM0695   | ybfE      | putative SOS response protein                              | -2.25 |
| STM0719   | STM0719   | putative UDP-galactopyranose mutase                        | 2.6   |
| STM0719   | STM0719   | putative UDP-galactopyranose mutase                        | 2.1   |
| STM0732   | sdhC      | succinate dehydrogenase cytochrome b556 large membrane sul | -2.86 |
| STM0732   | sdhC      | succinate dehydrogenase cytochrome b556 large membrane sul | -2.28 |
| STM0734   | sdhA      | succinate dehydrogenase catalytic subunit                  | -3.13 |
| STM0734   | sdhA      | succinate dehydrogenase catalytic subunit                  | -2.56 |
| STM0737   | sucB      | dihydrolipoamide acetyltransferase                         | -3.85 |
| STM0737   | sucB      | dihydrolipoamide acetyltransferase                         | -2.43 |
| STM0749   | pal       | peptidoglycan-associated lipoprotein precursor             | -3.96 |
| STM0749   | pal       | peptidoglycan-associated lipoprotein precursor             | -2.70 |
| STM0763,s | STM0763,s | transcriptional regulator                                  | 3.16  |
| STM0763,s | STM0763,s | transcriptional regulator                                  | 2.69  |
| STM0812   | ybhO      | cardiolipin synthase                                       | 2.79  |
| STM0812   | ybhO      | cardiolipin synthase                                       | 2.33  |
| STM0830   | glnH      | glutamine ABC transporter periplasmic-binding protein      | -2.56 |
| STM0830   | glnH      | glutamine ABC transporter periplasmic-binding protein      | -2.45 |
| STM0908   | STM0908   | hypothetical protein STM0908 [Phage Fels-1]                | 2.81  |
| STM0908   | STM0908   | hypothetical protein STM0908 [Phage Fels-1]                | 2.58  |
| STM0957   | cydD      | cytochrome-related transporter                             | -2.04 |
| STM0957   | cydD      | cytochrome-related transporter                             | -2.01 |
| STM0965   | dmsB      | anaerobic dimethyl sulfoxide reductase subunit B           | 3.54  |
| STM0965   | dmsB      | anaerobic dimethyl sulfoxide reductase subunit B           | 2.58  |
| STM0982   | himD      | integration host factor beta subunit                       | -2.76 |
| STM0982   | himD      | integration host factor beta subunit                       | -2.58 |
| STM1000   | asnS      | asparaginyl-tRNA synthetase                                | -2.42 |

|         |         |                                                   |       |
|---------|---------|---------------------------------------------------|-------|
| STM1000 | asnS    | asparaginyl-tRNA synthetase                       | -2.39 |
| STM1006 | STM1006 | excisionase                                       | 2.8   |
| STM1006 | STM1006 | excisionase                                       | 2.32  |
| STM1020 | STM1020 | hypothetical protein STM1020 [Phage Gifsy-2]      | 3.14  |
| STM1020 | STM1020 | hypothetical protein STM1020 [Phage Gifsy-2]      | 2.61  |
| STM1041 | STM1041 | probable minor tail protein [Phage Gifsy-2]       | 2.25  |
| STM1041 | STM1041 | probable minor tail protein [Phage Gifsy-2]       | 2.23  |
| STM1049 | STM1049 | probable tail fiber protein [Phage Gifsy-2]       | 3.44  |
| STM1049 | STM1049 | probable tail fiber protein [Phage Gifsy-2]       | 2.22  |
| STM1070 | ompA    | putative hydrogenase membrane component precursor | -2.80 |
| STM1070 | ompA    | putative hydrogenase membrane component precursor | -2.78 |
| STM1071 | sulA    | cell division inhibitor                           | -3.52 |
| STM1071 | sulA    | cell division inhibitor                           | -2.36 |
| STM1088 | pipB    | secreted effector protein                         | 2.57  |
| STM1088 | pipB    | secreted effector protein                         | 2.24  |
| STM1091 | sopB    | secreted effector protein                         | 2.79  |
| STM1091 | sopB    | secreted effector protein                         | 2.5   |
| STM1170 | mviN    | putative virulence protein                        | -2.36 |
| STM1170 | mviN    | putative virulence protein                        | -2.22 |
| STM1173 | flgA    | flagellar basal body P-ring biosynthesis protein  | -3.72 |
| STM1173 | flgA    | flagellar basal body P-ring biosynthesis protein  | -2.66 |
| STM1174 | flgB    | flagellar basal body rod protein                  | -3.88 |
| STM1174 | flgB    | flagellar basal body rod protein                  | -3.20 |
| STM1175 | flgC    | flagellar basal body rod protein                  | -3.48 |
| STM1175 | flgC    | flagellar basal body rod protein                  | -2.10 |
| STM1177 | flgE    | flagellar hook protein                            | -3.55 |
| STM1177 | flgE    | flagellar hook protein                            | -2.30 |
| STM1181 | flgI    | flagellar P-ring protein precursor                | -3.64 |
| STM1181 | flgI    | flagellar P-ring protein precursor                | -2.80 |
| STM1183 | flgK    | flagellar hook-associated protein                 | -3.26 |
| STM1183 | flgK    | flagellar hook-associated protein                 | -3.25 |
| STM1190 | yceD    | putative metal-binding protein                    | -4.19 |
| STM1190 | yceD    | putative metal-binding protein                    | -3.62 |
| STM1193 | fabH    | 3-oxoacyl-(acyl carrier protein) synthase         | -2.54 |
| STM1193 | fabH    | 3-oxoacyl-(acyl carrier protein) synthase         | -2.28 |
| STM1195 | fabG    | 3-ketoacyl-(acyl-carrier-protein) reductase       | -3.50 |
| STM1195 | fabG    | 3-ketoacyl-(acyl-carrier-protein) reductase       | -3.43 |
| STM1197 | fabF    | 3-oxoacyl-(acyl carrier protein) synthase         | -2.89 |
| STM1197 | fabF    | 3-oxoacyl-(acyl carrier protein) synthase         | -2.36 |
| STM1200 | tmk     | thymidylate kinase                                | -2.43 |
| STM1200 | tmk     | thymidylate kinase                                | -2.17 |
| STM1205 | ycfF    | putative protein kinase C inhibitor               | -2.66 |
| STM1205 | ycfF    | putative protein kinase C inhibitor               | -2.29 |
| STM1240 | envF    | putative envelope lipoprotein                     | 3.87  |
| STM1240 | envF    | putative envelope lipoprotein                     | 2.55  |
| STM1246 | pagC    | virulence membrane protein PAGC precursor         | 3.23  |
| STM1246 | pagC    | virulence membrane protein PAGC precursor         | 2.25  |
| STM1251 | STM1251 | putative molecular chaperone                      | 2.93  |
| STM1251 | STM1251 | putative molecular chaperone                      | 2.56  |
| STM1284 | yeaH    | hypothetical protein STM1284                      | 5.57  |
| STM1284 | yeaH    | hypothetical protein STM1284                      | 4.62  |

|           |         |                                                   |       |
|-----------|---------|---------------------------------------------------|-------|
| STM1297   | selD    | selenophosphate synthetase                        | 2.99  |
| STM1297   | selD    | selenophosphate synthetase                        | 2.56  |
| STM1313   | celB    | sugar-specific enzyme II                          | 3.03  |
| STM1313   | celB    | sugar-specific enzyme II                          | 2.47  |
| STM1329   | STM1329 | putative inner membrane protein                   | 3.72  |
| STM1329   | STM1329 | putative inner membrane protein                   | 2.18  |
| STM1334,c | infC    | translation initiation factor IF-3                | -2.87 |
| STM1334,c | infC    | translation initiation factor IF-3                | -2.53 |
| STM1376   | lppB    | putative methyl-accepting chemotaxis protein      | -2.78 |
| STM1376   | lppB    | putative methyl-accepting chemotaxis protein      | -2.27 |
| STM1377   | lpp     | murein lipoprotein                                | -3.96 |
| STM1377   | lpp     | murein lipoprotein                                | -3.43 |
| STM1378   | pykF    | pyruvate kinase                                   | -3.38 |
| STM1378   | pykF    | pyruvate kinase                                   | -2.48 |
| STM1398   | sseB    | translocation machinery component                 | 2.92  |
| STM1398   | sseB    | translocation machinery component                 | 2.89  |
| STM1399   | sscA    | secretion system chaperone                        | 4.21  |
| STM1399   | sscA    | secretion system chaperone                        | 3.16  |
| STM1402   | sseE    | secreted effector protein                         | 3.51  |
| STM1402   | sseE    | secreted effector protein                         | 2.39  |
| STM1466   | ydgA    | putative periplasmic protein                      | -2.30 |
| STM1466   | ydgA    | putative periplasmic protein                      | -2.11 |
| STM1499   | STM1499 | putative dimethyl sulphoxide reductase chain A1   | 4.09  |
| STM1499   | STM1499 | putative dimethyl sulphoxide reductase chain A1   | 3.96  |
| STM1510   | ydfH    | putative regulatory protein                       | 3.1   |
| STM1510   | ydfH    | putative regulatory protein                       | 2.37  |
| STM1535   | STM1535 | putative hydrogenase protein                      | 3.96  |
| STM1535   | STM1535 | putative hydrogenase protein                      | 2.86  |
| STM1568   | fdnI    | formate dehydrogenase-N gamma subunit             | 3.4   |
| STM1568   | fdnI    | formate dehydrogenase-N gamma subunit             | 2.73  |
| STM1572   | nmpC    | putative outer membrane porin precursor           | -3.69 |
| STM1572   | nmpC    | putative outer membrane porin precursor           | -2.09 |
| STM1577   | narZ    | nitrate reductase 2 alpha subunit                 | 4.53  |
| STM1577   | narZ    | nitrate reductase 2 alpha subunit                 | 2.91  |
| STM1686   | pspE    | phage shock protein                               | 3.12  |
| STM1686   | pspE    | phage shock protein                               | 2.04  |
| STM1688   | pspC    | phage shock protein                               | 3.83  |
| STM1688   | pspC    | phage shock protein                               | 3.22  |
| STM1689   | pspB    | phage shock protein B                             | 5.81  |
| STM1689   | pspB    | phage shock protein B                             | 4.46  |
| STM1690   | pspA    | phage shock protein                               | 5.27  |
| STM1690   | pspA    | phage shock protein                               | 4.41  |
| STM1731   | STM1731 | putative catalase                                 | 3.07  |
| STM1731   | STM1731 | putative catalase                                 | 2.73  |
| STM1774   | sirC    | transcriptional regulator                         | -2.26 |
| STM1774   | sirC    | transcriptional regulator                         | -2.16 |
| STM1777   | hemA    | glutamyl-tRNA reductase                           | -2.97 |
| STM1777   | hemA    | glutamyl-tRNA reductase                           | -2.25 |
| STM1779   | ipk     | 4-diphosphocytidyl-2-C-methyl-D-erythritol kinase | -3.30 |
| STM1779   | ipk     | 4-diphosphocytidyl-2-C-methyl-D-erythritol kinase | -2.98 |
| STM1786   | STM1786 | hydrogenase-1 small subunit                       | 4.66  |

|                |              |                                             |             |
|----------------|--------------|---------------------------------------------|-------------|
| STM1786        | STM1786      | hydrogenase-1 small subunit                 | 2.72        |
| STM1837        | cspC         | cold shock protein                          | -3.63       |
| STM1837        | cspC         | cold shock protein                          | -2.05       |
| STM1846        | proQ         | putative solute/DNA competence effector     | -3.60       |
| STM1846        | proQ         | putative solute/DNA competence effector     | -2.90       |
| <b>STM1868</b> | <b>mig-3</b> | <b>phage-tail assembly-like protein</b>     | <b>4.72</b> |
| <b>STM1868</b> | <b>mig-3</b> | <b>phage-tail assembly-like protein</b>     | <b>3.84</b> |
| STM1869        | STM1869      | phage-tail assembly-like protein            | 5.63        |
| STM1869        | STM1869      | phage-tail assembly-like protein            | 2.63        |
| STM1882        | yebG         | DNA damage-inducible protein                | 2.87        |
| STM1882        | yebG         | DNA damage-inducible protein                | 2.11        |
| STM1883        | purT         | 5'-phosphoribosylglycinamide transformylase | 3.25        |
| STM1883        | purT         | 5'-phosphoribosylglycinamide transformylase | 3.02        |
| STM1905        | yecO         | putative SAM-dependent methyltransferase    | -2.30       |
| STM1905        | yecO         | putative SAM-dependent methyltransferase    | -2.20       |
| STM1916        | cheY         | chemotaxis regulator                        | -5.49       |
| STM1916        | cheY         | chemotaxis regulator                        | -3.66       |
| STM1917        | cheB         | chemotaxis-specific methylesterase          | -4.75       |
| STM1917        | cheB         | chemotaxis-specific methylesterase          | -3.90       |
| STM1921        | cheA         | chemotaxis sensory histidine protein kinase | -3.61       |
| STM1921        | cheA         | chemotaxis sensory histidine protein kinase | -3.19       |
| STM1922        | motB         | flagellar motor protein                     | -2.77       |
| STM1922        | motB         | flagellar motor protein                     | -2.58       |
| STM1943        | cysT         | STM1943                                     | -2.90       |
| STM1943        | cysT         | STM1943                                     | -2.80       |
| STM1958        | fliB         | lysine-N-methylase                          | -2.57       |
| STM1958        | fliB         | lysine-N-methylase                          | -2.52       |
| STM1959        | fliC         | flagellar biosynthesis protein              | -4.90       |
| STM1959        | fliC         | flagellar biosynthesis protein              | -3.82       |
| STM1961        | fliS         | flagellar protein FliS                      | -3.64       |
| STM1961        | fliS         | flagellar protein FliS                      | -2.74       |
| STM1962        | fliT         | possible FliD export chaperone              | -2.66       |
| STM1962        | fliT         | possible FliD export chaperone              | -2.57       |
| STM1969        | fliF         | flagellar M-ring protein                    | -3.40       |
| STM1969        | fliF         | flagellar M-ring protein                    | -2.24       |
| STM1970        | fliG         | flagellar motor protein                     | -3.89       |
| STM1970        | fliG         | flagellar motor protein                     | -3.03       |
| STM1971        | fliH         | flagellar assembly protein                  | -4.84       |
| STM1971        | fliH         | flagellar assembly protein                  | -3.13       |
| STM1974        | fliK         | flagellar hook-length control protein       | -2.84       |
| STM1974        | fliK         | flagellar hook-length control protein       | -2.33       |
| STM1975        | fliL         | flagellar biosynthesis protein              | -2.53       |
| STM1975        | fliL         | flagellar biosynthesis protein              | -2.31       |
| STM1976        | fliM         | flagellar motor switch protein              | -3.97       |
| STM1976        | fliM         | flagellar motor switch protein              | -2.85       |
| STM1977        | fliN         | flagellar motor switch protein              | -3.07       |
| STM1977        | fliN         | flagellar motor switch protein              | -2.77       |
| STM1978        | fliO         | flagellar biosynthetic protein              | -3.02       |
| STM1978        | fliO         | flagellar biosynthetic protein              | -2.02       |
| STM2054        | pduT         | polyhedral body protein                     | 2.58        |
| STM2054        | pduT         | polyhedral body protein                     | 2.14        |

|            |            |                                                             |       |
|------------|------------|-------------------------------------------------------------|-------|
| STM2082    | rfbP       | undecaprenol-phosphate galactosephosphotransferase/O-antige | -3.06 |
| STM2082    | rfbP       | undecaprenol-phosphate galactosephosphotransferase/O-antige | -2.95 |
| STM2085    | rfbN       | rhamnosyl transferase                                       | -3.93 |
| STM2085    | rfbN       | rhamnosyl transferase                                       | -2.53 |
| STM2087    | rfbV       | abequosyltransferase                                        | -4.02 |
| STM2087    | rfbV       | abequosyltransferase                                        | -2.75 |
| STM2090    | rfbH       | CDP-6-deoxy-D-xylo-4-hexulose-3-dehydrase                   | -3.00 |
| STM2090    | rfbH       | CDP-6-deoxy-D-xylo-4-hexulose-3-dehydrase                   | -2.89 |
| STM2094    | rfbC       | dTDP-4,deoxyrhamnose 3,5 epimerase                          | -3.04 |
| STM2094    | rfbC       | dTDP-4,deoxyrhamnose 3,5 epimerase                          | -2.83 |
| STM2138    | STM2138    | putative cytoplasmic protein                                | 3.1   |
| STM2138    | STM2138    | putative cytoplasmic protein                                | 2.74  |
| STM2139,2n | STM2139,2n | hypothetical protein STM2139,2n                             | 2.07  |
| STM2139,2n | STM2139,2n | hypothetical protein STM2139,2n                             | 2.04  |
| STM2160    | yehV       | putative transcriptional repressor                          | 3.14  |
| STM2160    | yehV       | putative transcriptional repressor                          | 2.38  |
| STM2206    | fruF       | phosphoenolpyruvate-dependent sugar phosphotransferase sysI | -2.48 |
| STM2206    | fruF       | phosphoenolpyruvate-dependent sugar phosphotransferase sysI | -2.35 |
| STM2227    | yejL       | putative cytoplasmic protein                                | -2.27 |
| STM2227    | yejL       | putative cytoplasmic protein                                | -2.20 |
| STM2267    | ompC       | outer membrane protein C precursor                          | -4.48 |
| STM2267    | ompC       | outer membrane protein C precursor                          | -3.54 |
| STM2285    | glpB       | anaerobic glycerol-3-phosphate dehydrogenase subunit B      | 2.35  |
| STM2285    | glpB       | anaerobic glycerol-3-phosphate dehydrogenase subunit B      | 2.05  |
| STM2317    | nuoM       | NADH dehydrogenase subunit M                                | -4.87 |
| STM2317    | nuoM       | NADH dehydrogenase subunit M                                | -3.91 |
| STM2318    | nuoL       | NADH dehydrogenase subunit L                                | -3.74 |
| STM2318    | nuoL       | NADH dehydrogenase subunit L                                | -2.24 |
| STM2319    | nuoK       | NADH dehydrogenase kappa subunit                            | -3.43 |
| STM2319    | nuoK       | NADH dehydrogenase kappa subunit                            | -2.16 |
| STM2322    | nuoH       | NADH dehydrogenase subunit H                                | -3.58 |
| STM2322    | nuoH       | NADH dehydrogenase subunit H                                | -2.48 |
| STM2323,S  | nuoG       | NADH dehydrogenase gamma subunit                            | -2.12 |
| STM2323,S  | nuoG       | NADH dehydrogenase gamma subunit                            | -2.08 |
| STM2324    | nuoF       | NADH dehydrogenase I chain F                                | -3.95 |
| STM2324    | nuoF       | NADH dehydrogenase I chain F                                | -2.69 |
| STM2325    | nuoE       | ATP synthase subunit E                                      | -4.29 |
| STM2325    | nuoE       | ATP synthase subunit E                                      | -2.49 |
| STM2326    | nuoC       | NADH dehydrogenase I chain C/D                              | -3.52 |
| STM2326    | nuoC       | NADH dehydrogenase I chain C/D                              | -3.47 |
| STM2327    | nuoB       | NADH dehydrogenase beta subunit                             | -3.50 |
| STM2327    | nuoB       | NADH dehydrogenase beta subunit                             | -2.21 |
| STM2328    | nuoA       | NADH dehydrogenase alpha subunit                            | -3.78 |
| STM2328    | nuoA       | NADH dehydrogenase alpha subunit                            | -2.67 |
| STM2337    | ackA       | acetate/propionate kinase                                   | -4.41 |
| STM2337    | ackA       | acetate/propionate kinase                                   | -3.85 |
| STM2370    | pdxB       | erythronate-4-phosphate dehydrogenase                       | -3.42 |
| STM2370    | pdxB       | erythronate-4-phosphate dehydrogenase                       | -3.34 |
| STM2393    | yfdC       | hypothetical protein STM2393                                | 4.12  |
| STM2393    | yfdC       | hypothetical protein STM2393                                | 3.08  |
| STM2419    | lysV       | STM2419                                                     | -2.29 |

|           |           |                                                        |       |
|-----------|-----------|--------------------------------------------------------|-------|
| STM2419   | lysV      | STM2419                                                | -2.17 |
| STM2432   | ptsI      | PEP-protein phosphotransferase                         | -2.90 |
| STM2432   | ptsI      | PEP-protein phosphotransferase                         | -2.12 |
| STM2461   | eutG      | putative transport protein                             | 3.3   |
| STM2461   | eutG      | putative transport protein                             | 3.18  |
| STM2470   | eutS      | putative carboxysome structural protein                | 4.65  |
| STM2470   | eutS      | putative carboxysome structural protein                | 4.11  |
| STM2475   | STM2475   | putative cytoplasmic protein                           | 7.1   |
| STM2475   | STM2475   | putative cytoplasmic protein                           | 5.91  |
| STM2489   | dapA      | dihydrodipicolinate synthase                           | -3.32 |
| STM2489   | dapA      | dihydrodipicolinate synthase                           | -2.91 |
| STM2520   | yfgL      | putative serine/threonine protein kinase               | -2.42 |
| STM2520   | yfgL      | putative serine/threonine protein kinase               | -2.40 |
| STM2523   | gcpE      | 4-hydroxy-3-methylbut-2-en-1-yl diphosphate synthase   | -3.06 |
| STM2523   | gcpE      | 4-hydroxy-3-methylbut-2-en-1-yl diphosphate synthase   | -2.14 |
| STM2525   | yfgB      | putative FeS redox enzyme                              | -2.54 |
| STM2525   | yfgB      | putative FeS redox enzyme                              | -2.51 |
| STM2537   | yfhJ      | hypothetical protein STM2537                           | -4.72 |
| STM2537   | yfhJ      | hypothetical protein STM2537                           | -3.52 |
| STM2543   | nifS      | cysteine desulfurase                                   | -2.64 |
| STM2543   | nifS      | cysteine desulfurase                                   | -2.10 |
| STM2586   | STM2586   | phage tail assembly-like protein                       | 3.39  |
| STM2586   | STM2586   | phage tail assembly-like protein                       | 2.23  |
| STM2611,S | STM2611,S | endopeptidase-like protein                             | 3.65  |
| STM2611,S | STM2611,S | endopeptidase-like protein                             | 3.14  |
| STM2621   | STM2621   | hypothetical protein STM2621                           | 2.64  |
| STM2621   | STM2621   | hypothetical protein STM2621                           | 2.42  |
| STM2632   | STM2632   | exodeoxyribonuclease VIII-like protein [Phage Gifsy-1] | 3.82  |
| STM2632   | STM2632   | exodeoxyribonuclease VIII-like protein [Phage Gifsy-1] | 2.7   |
| STM2673   | rplS      | 50S ribosomal protein L19                              | -3.44 |
| STM2673   | rplS      | 50S ribosomal protein L19                              | -2.54 |
| STM2735   | STM2735   | hypothetical protein STM2735                           | 4.05  |
| STM2735   | STM2735   | hypothetical protein STM2735                           | 2.22  |
| STM2767   | STM2767   | putative DNA/RNA helicase                              | -2.24 |
| STM2767   | STM2767   | putative DNA/RNA helicase                              | -2.24 |
| STM2770   | fljA      | phase-1 flagellin repressor                            | -2.82 |
| STM2770   | fljA      | phase-1 flagellin repressor                            | -2.43 |
| STM2771   | fljB      | flagellar biosynthesis protein                         | -4.11 |
| STM2771   | fljB      | flagellar biosynthesis protein                         | -3.21 |
| STM2824   | -         | STM2824                                                | -2.83 |
| STM2824   | -         | STM2824                                                | -2.61 |
| STM2826   | csrA      | carbon storage regulator                               | -2.47 |
| STM2826   | csrA      | carbon storage regulator                               | -2.40 |
| STM2861   | sitA      | putative periplasmic binding protein                   | 3.27  |
| STM2861   | sitA      | putative periplasmic binding protein                   | 2.76  |
| STM2865   | avrA      | secreted effector protein                              | 2.8   |
| STM2865   | avrA      | secreted effector protein                              | 2.8   |
| STM2892   | invJ      | needle length control protein                          | 3.34  |
| STM2892   | invJ      | needle length control protein                          | 2.85  |
| STM2893   | invI      | needle complex assembly protein                        | 3.22  |
| STM2893   | invI      | needle complex assembly protein                        | 2.95  |

|         |         |                                       |       |
|---------|---------|---------------------------------------|-------|
| STM2903 | STM2903 | putative cytoplasmic protein          | 3.71  |
| STM2903 | STM2903 | putative cytoplasmic protein          | 3.58  |
| STM2927 | surE    | acid phosphatase                      | -2.95 |
| STM2927 | surE    | acid phosphatase                      | -2.16 |
| STM2935 | cysD    | sulfate adenylyltransferase subunit 2 | 3.36  |
| STM2935 | cysD    | sulfate adenylyltransferase subunit 2 | 2.08  |
| STM2943 | STM2943 | putative cytoplasmic protein          | 2.93  |
| STM2943 | STM2943 | putative cytoplasmic protein          | 2.69  |
| STM2953 | pyrG    | CTP synthetase                        | -3.17 |
| STM2953 | pyrG    | CTP synthetase                        | -2.58 |
| STM2970 | sdaC    | putative serine transport protein     | -3.38 |
| STM2970 | sdaC    | putative serine transport protein     | -2.93 |
| STM3052 | STM3052 | putative outer membrane protein       | 3.94  |
| STM3052 | STM3052 | putative outer membrane protein       | 2.19  |
| STM3055 | gcvT    | aminomethyltransferase                | -2.76 |
| STM3055 | gcvT    | aminomethyltransferase                | -2.13 |
| STM3083 | STM3083 | putative mannitol dehydrogenase       | 8.76  |
| STM3083 | STM3083 | putative mannitol dehydrogenase       | 4.81  |
| STM3087 | yqgB    | putative inner membrane protein       | -2.91 |
| STM3087 | yqgB    | putative inner membrane protein       | -2.57 |
| STM3093 | endA    | DNA-specific endonuclease I           | -3.68 |
| STM3093 | endA    | DNA-specific endonuclease I           | -3.15 |
| STM3133 | STM3133 | putative amidohydrolase               | 2.66  |
| STM3133 | STM3133 | putative amidohydrolase               | 2.33  |
| STM3179 | mdaB    | NADPH-specific quinone oxidoreductase | -2.22 |
| STM3179 | mdaB    | NADPH-specific quinone oxidoreductase | -2.18 |
| STM3209 | rpsU    | 30S ribosomal protein S21             | -3.12 |
| STM3209 | rpsU    | 30S ribosomal protein S21             | -2.41 |
| STM3283 | rpsO    | 30S ribosomal protein S15             | -2.67 |
| STM3283 | rpsO    | 30S ribosomal protein S15             | -2.42 |
| STM3289 | metY    | STM3289                               | 2.53  |
| STM3289 | metY    | STM3289                               | 2.35  |
| STM3346 | yhcM    | putative ATPase                       | -3.41 |
| STM3346 | yhcM    | putative ATPase                       | -2.27 |
| STM3352 | oadA    | oxaloacetate decarboxylase            | 3     |
| STM3352 | oadA    | oxaloacetate decarboxylase            | 2.56  |
| STM3384 | yhdG    | possible dehydrogenase                | -3.74 |
| STM3384 | yhdG    | possible dehydrogenase                | -3.37 |
| STM3385 | fis     | DNA-binding protein Fis               | -3.60 |
| STM3385 | fis     | DNA-binding protein Fis               | -2.09 |
| STM3396 | rrlD    | STM3396                               | -2.94 |
| STM3396 | rrlD    | STM3396                               | -2.04 |
| STM3414 | rplQ    | 50S ribosomal protein L17             | -4.07 |
| STM3414 | rplQ    | 50S ribosomal protein L17             | -3.86 |
| STM3417 | rpsK    | 30S ribosomal protein S11             | -2.22 |
| STM3417 | rpsK    | 30S ribosomal protein S11             | -2.21 |
| STM3420 | secY    | preprotein translocase SecY           | -2.63 |
| STM3420 | secY    | preprotein translocase SecY           | -2.50 |
| STM3422 | rpmD    | 50S ribosomal protein L30             | -2.83 |
| STM3422 | rpmD    | 50S ribosomal protein L30             | -2.82 |
| STM3426 | rpsH    | 30S ribosomal protein S8              | -2.72 |

|                |             |                                                          |             |
|----------------|-------------|----------------------------------------------------------|-------------|
| STM3426        | rpsH        | 30S ribosomal protein S8                                 | -2.65       |
| STM3428        | rplE        | 50S ribosomal protein L5                                 | -3.22       |
| STM3428        | rplE        | 50S ribosomal protein L5                                 | -3.16       |
| STM3429        | rplX        | 50S ribosomal protein L24                                | -4.28       |
| STM3429        | rplX        | 50S ribosomal protein L24                                | -3.03       |
| STM3429        | rplX        | 50S ribosomal protein L24                                | -2.95       |
| STM3429        | rplX        | 50S ribosomal protein L24                                | -2.89       |
| STM3430        | rplN        | 50S ribosomal protein L14                                | -3.83       |
| STM3430        | rplN        | 50S ribosomal protein L14                                | -3.49       |
| STM3430        | rplN        | 50S ribosomal protein L14                                | -2.34       |
| STM3430        | rplN        | 50S ribosomal protein L14                                | -2.26       |
| STM3431        | rpsQ        | 30S ribosomal protein S17                                | -2.83       |
| STM3431        | rpsQ        | 30S ribosomal protein S17                                | -2.50       |
| STM3475        | nirD        | nitrite reductase small subunit                          | 3.63        |
| STM3475        | nirD        | nitrite reductase small subunit                          | 3.62        |
| STM3482        | gph         | phosphoglycolate phosphatase                             | -3.45       |
| STM3482        | gph         | phosphoglycolate phosphatase                             | -2.72       |
| STM3486        | aroB        | 3-dehydroquinate synthase                                | -2.56       |
| STM3486        | aroB        | 3-dehydroquinate synthase                                | -2.50       |
| STM3487        | aroK        | shikimate kinase I                                       | -3.28       |
| STM3487        | aroK        | shikimate kinase I                                       | -3.00       |
| STM3510        | yhgH        | putative amidophosphoribosyltransferase                  | -2.59       |
| STM3510        | yhgH        | putative amidophosphoribosyltransferase                  | -2.05       |
| STM3558        | STM3558     | death-on-curing protein                                  | 4.75        |
| STM3558        | STM3558     | death-on-curing protein                                  | 4.49        |
| STM3640        | lpfA        | long polar fimbrial protein A precursor                  | 2.16        |
| STM3640        | lpfA        | long polar fimbrial protein A precursor                  | 2.1         |
| STM3656        | glyQ        | glycyl-tRNA synthetase alpha subunit                     | -3.02       |
| STM3656        | glyQ        | glycyl-tRNA synthetase alpha subunit                     | -2.11       |
| STM3702        | grxC        | glutaredoxin 3                                           | -2.60       |
| STM3702        | grxC        | glutaredoxin 3                                           | -2.17       |
| STM3705        | yibP        | hypothetical protein STM3705                             | -3.36       |
| STM3705        | yibP        | hypothetical protein STM3705                             | -2.12       |
| STM3709        | kbl         | 2-amino-3-ketobutyrate coenzyme A ligase                 | -3.08       |
| STM3709        | kbl         | 2-amino-3-ketobutyrate coenzyme A ligase                 | -2.32       |
| STM3711        | rfaF        | ADP-heptose-LPS heptosyltransferase 1                    | -3.26       |
| STM3711        | rfaF        | ADP-heptose-LPS heptosyltransferase 1                    | -2.84       |
| STM3718        | rfal        | lipopolysaccharide-alpha-1,3-D-galactosyltransferase     | -3.39       |
| STM3718        | rfal        | lipopolysaccharide-alpha-1,3-D-galactosyltransferase     | -2.92       |
| STM3723        | rfaQ        | lipopolysaccharide core biosynthetic protein             | -2.88       |
| STM3723        | rfaQ        | lipopolysaccharide core biosynthetic protein             | -2.33       |
| STM3727        | rpmG        | 50S ribosomal protein L33                                | -3.17       |
| STM3727        | rpmG        | 50S ribosomal protein L33                                | -2.25       |
| STM3728        | rpmB        | 50S ribosomal protein L28                                | -4.10       |
| STM3728        | rpmB        | 50S ribosomal protein L28                                | -3.39       |
| STM3742        | spoT        | (p)ppGpp synthetase II/guanosine-3',5'-bis pyrophosphate | -3.18       |
| STM3742        | spoT        | (p)ppGpp synthetase II/guanosine-3',5'-bis pyrophosphate | -3.10       |
| <b>STM3764</b> | <b>mgtC</b> | <b>Mg2+ transport protein</b>                            | <b>5.18</b> |
| <b>STM3764</b> | <b>mgtC</b> | <b>Mg2+ transport protein</b>                            | <b>4.25</b> |
| STM3774        | STM3774     | putative inner membrane protein                          | 4.3         |
| STM3774        | STM3774     | putative inner membrane protein                          | 3.75        |

|           |         |                                          |       |
|-----------|---------|------------------------------------------|-------|
| STM3808,S | ibpB    | small heat shock protein                 | 3.17  |
| STM3808,S | ibpB    | small heat shock protein                 | 2.54  |
| STM3815   | ccmE    | periplasmic heme-dependent peroxidase    | 2.85  |
| STM3815   | ccmE    | periplasmic heme-dependent peroxidase    | 2.49  |
| STM3815   | ccmE    | periplasmic heme-dependent peroxidase    | 2.44  |
| STM3815   | ccmE    | periplasmic heme-dependent peroxidase    | 2.37  |
| STM3836   | recF    | recombination protein F                  | -3.28 |
| STM3836   | recF    | recombination protein F                  | -2.68 |
| STM3847   | yidY    | putative tranport protein                | 2.26  |
| STM3847   | yidY    | putative tranport protein                | 2.01  |
| STM3867   | atpA    | ATP synthase subunit A                   | -3.90 |
| STM3867   | atpA    | ATP synthase subunit A                   | -3.01 |
| STM3868   | atpH    | ATP synthase subunit D                   | -3.47 |
| STM3868   | atpH    | ATP synthase subunit D                   | -3.17 |
| STM3869   | atpF    | ATP synthase subunit B                   | -5.00 |
| STM3869   | atpF    | ATP synthase subunit B                   | -3.65 |
| STM3870   | atpE    | ATP synthase subunit C                   | -3.26 |
| STM3870   | atpE    | ATP synthase subunit C                   | -2.57 |
| STM3871   | atpB    | ATP synthase subunit A                   | -3.74 |
| STM3871   | atpB    | ATP synthase subunit A                   | -3.44 |
| STM3872   | atpI    | ATP synthase subunit I                   | -3.46 |
| STM3872   | atpI    | ATP synthase subunit I                   | -2.42 |
| STM3914   | rhlB    | ATP-dependent RNA helicase               | -2.53 |
| STM3914   | rhlB    | ATP-dependent RNA helicase               | -2.20 |
| STM3923   | rffH    | glucose-1-phosphate thymidyl transferase | -2.06 |
| STM3923   | rffH    | glucose-1-phosphate thymidyl transferase | -2.05 |
| STM3931   | argX    | STM3931                                  | -3.91 |
| STM3931   | argX    | STM3931                                  | -2.72 |
| STM3934   | proM    | STM3934                                  | -2.20 |
| STM3934   | proM    | STM3934                                  | -2.12 |
| STM3937   | STM3937 | uroporphyrinogen-III synthetase          | -3.02 |
| STM3937   | STM3937 | uroporphyrinogen-III synthetase          | -2.08 |
| STM3938   | hemC    | porphobilinogen deaminase                | -3.03 |
| STM3938   | hemC    | porphobilinogen deaminase                | -2.66 |
| STM3991   | rrlA    | STM3991                                  | -2.94 |
| STM3991   | rrlA    | STM3991                                  | -2.70 |
| STM3991   | rrlA    | STM3991                                  | -2.65 |
| STM3991   | rrlA    | STM3991                                  | -2.25 |
| STM4014   | STM4014 | putative periplasmic protein             | 6.92  |
| STM4014   | STM4014 | putative periplasmic protein             | 5.83  |
| STM4037   | fdoG    | formate dehydrogenase alpha subunit      | -3.06 |
| STM4037   | fdoG    | formate dehydrogenase alpha subunit      | -2.23 |
| STM4075   | ydeY    | putative sugar transport protein         | 3.51  |
| STM4075   | ydeY    | putative sugar transport protein         | 2.41  |
| STM4087   | glpF    | glycerol diffusion                       | -2.30 |
| STM4087   | glpF    | glycerol diffusion                       | -2.20 |
| STM4092   | hslV    | ATP-dependent protease peptidase subunit | -2.78 |
| STM4092   | hslV    | ATP-dependent protease peptidase subunit | -2.02 |
| STM4132   | rrsB    | STM4132                                  | -2.55 |
| STM4132   | rrsB    | STM4132                                  | -2.53 |
| STM4132   | rrsB    | STM4132                                  | -2.49 |

|                |             |                                            |             |
|----------------|-------------|--------------------------------------------|-------------|
| STM4132        | rrsB        | STM4132                                    | -2.12       |
| STM4132        | rrsB        | STM4132                                    | -2.10       |
| STM4132        | rrsB        | STM4132                                    | -2.10       |
| STM4135        | rrlB        | STM4135                                    | -2.96       |
| STM4135        | rrlB        | STM4135                                    | -2.74       |
| STM4142        | thrU        | STM4142                                    | -3.69       |
| STM4142        | thrU        | STM4142                                    | -2.98       |
| STM4144        | glyT        | STM4144                                    | -4.73       |
| STM4144        | glyT        | STM4144                                    | -4.48       |
| STM4146        | tuf         | elongation factor Tu                       | -2.89       |
| STM4146        | tuf         | elongation factor Tu                       | -2.05       |
| STM4148        | nusG        | transcription antitermination protein NusG | -2.94       |
| STM4148        | nusG        | transcription antitermination protein NusG | -2.39       |
| STM4149        | rplK        | 50S ribosomal protein L11                  | -3.32       |
| STM4149        | rplK        | 50S ribosomal protein L11                  | -2.24       |
| STM4150        | rplA        | 50S ribosomal protein L1                   | -3.81       |
| STM4150        | rplA        | 50S ribosomal protein L1                   | -3.73       |
| STM4151        | rplJ        | 50S ribosomal protein L10                  | -2.84       |
| STM4151        | rplJ        | 50S ribosomal protein L10                  | -2.61       |
| STM4153        | rpoB        | DNA-directed RNA polymerase beta subunit   | -3.71       |
| STM4153        | rpoB        | DNA-directed RNA polymerase beta subunit   | -2.63       |
| STM4170        | hupA        | DNA-binding protein HU-alpha               | -4.57       |
| STM4170        | hupA        | DNA-binding protein HU-alpha               | -3.99       |
| STM4205        | STM4205     | putative phage glycosyltransferase         | 3.94        |
| STM4205        | STM4205     | putative phage glycosyltransferase         | 2.65        |
| STM4221        | pgi         | glucose-6-phosphate isomerase              | -4.34       |
| STM4221        | pgi         | glucose-6-phosphate isomerase              | -3.54       |
| <b>STM4319</b> | <b>phoN</b> | <b>non-specific acid phosphatase</b>       | <b>3.43</b> |
| <b>STM4319</b> | <b>phoN</b> | <b>non-specific acid phosphatase</b>       | <b>2.41</b> |
| STM4334        | efp         | elongation factor P                        | -2.31       |
| STM4334        | efp         | elongation factor P                        | -2.18       |
| STM4377        | aidB        | putative acyl-CoA dehydrogenase            | 2.52        |
| STM4377        | aidB        | putative acyl-CoA dehydrogenase            | 2.47        |
| STM4388        | sgaE        | L-ribulose-5-phosphate 4-epimerase         | -2.50       |
| STM4388        | sgaE        | L-ribulose-5-phosphate 4-epimerase         | -2.21       |
| STM4391        | rpsF        | 30S ribosomal protein S6                   | -4.73       |
| STM4391        | rpsF        | 30S ribosomal protein S6                   | -4.51       |
| STM4393        | rpsR        | 30S ribosomal protein S18                  | -3.27       |
| STM4393        | rpsR        | 30S ribosomal protein S18                  | -2.01       |
| STM4394        | rplI        | 50S ribosomal protein L9                   | -3.24       |
| STM4394        | rplI        | 50S ribosomal protein L9                   | -2.66       |
| STM4415        | fbp         | fructose-1,6-bisphosphatase                | -2.38       |
| STM4415        | fbp         | fructose-1,6-bisphosphatase                | -2.05       |
| STM4418        | STM4418     | sugar transporter                          | 3.24        |
| STM4418        | STM4418     | sugar transporter                          | 3.13        |
| STM4458        | yjgF        | putative translation initiation inhibitor  | -2.68       |
| STM4458        | yjgF        | putative translation initiation inhibitor  | -2.09       |
| STM4467        | STM4467     | arginine deiminase                         | 3.73        |
| STM4467        | STM4467     | arginine deiminase                         | 2.76        |
| STM4477        | pepA        | leucyl aminopeptidase                      | -4.12       |
| STM4477        | pepA        | leucyl aminopeptidase                      | -4.07       |

|         |         |                                 |              |
|---------|---------|---------------------------------|--------------|
| STM4493 | STM4493 | putative cytoplasmic protein    | <b>-2.82</b> |
| STM4493 | STM4493 | putative cytoplasmic protein    | <b>-2.34</b> |
| STM4498 | STM4498 | putative inner membrane protein | <b>-2.73</b> |
| STM4498 | STM4498 | putative inner membrane protein | <b>-2.07</b> |

**Table S4.** *S. Typhimurium* genes significantly **up-regulated** ( $\log_2 M \geq 2$ ) in **intracellular WT** at 24 h p.i. inside fibroblasts (**51 genes**, see Fig. 2A)

| Systematic name | Gene        | Product                                                |
|-----------------|-------------|--------------------------------------------------------|
| PSLT006         | repA        | DNA replication protein                                |
| PSLT008         | srgC        | putative regulatory protein                            |
| PSLT010         | srgB        | putative outer membrane protein                        |
| PSLT029         | PSLT029     | putative cytoplasmic protein                           |
| PSLT038         | spvC        | hydrophilic protein                                    |
| PSLT046         | PSLT046     | putative carbonic anhydrase                            |
| PSLT066         | ssbB        | single-strand DNA binding protein                      |
| PSLT070         | psiA        | PsiA                                                   |
| PSLT072         | PSLT072     | putative transglycosylase                              |
| PSLT079         | traE        | pilus assembly protein                                 |
| PSLT081         | traB        | pilus assembly protein                                 |
| STM0056         | STM0056     | putative oxaloacetate decarboxylase subunit gamma      |
| STM0279         | STM0279     | putative cytoplasmic protein                           |
| STM0339         | stbB        | putative fimbrial chaperone                            |
| STM0494         | ushA        | UDP-sugar hydrolase/5'-nucleotidase                    |
| STM0548         | fimF        | putative fimbrial protein                              |
| STM0561         | STM0561     | sensor kinase                                          |
| STM0581         | STM0581     | putative regulatory protein                            |
| STM0662         | gltL        | glutamate/aspartate transporter                        |
| STM0688         | ybfN        | putative lipoprotein                                   |
| STM0719         | STM0719     | putative UDP-galactopyranose mutase                    |
| STM0812         | ybhO        | cardiolipin synthase                                   |
| STM0965         | dmsB        | anaerobic dimethyl sulfoxide reductase subunit B       |
| STM1020         | STM1020     | hypothetical protein STM1020 [Phage Gifsy-2]           |
| STM1041         | STM1041     | probable minor tail protein [Phage Gifsy-2]            |
| <b>STM1091</b>  | <b>sopB</b> | <b>secreted effector protein</b>                       |
| <b>STM1246</b>  | <b>pagC</b> | <b>virulence membrane protein PAGC precursor</b>       |
| STM1297         | selD        | selenophosphate synthetase                             |
| STM1499         | STM1499     | putative dimethyl sulphoxide reductase chain A1        |
| STM2054         | pduT        | polyhedral body protein                                |
| STM2139,2n      | STM2139,2n  | hypothetical protein STM2139,2n                        |
| STM2285         | glpB        | anaerobic glycerol-3-phosphate dehydrogenase subunit B |
| STM2461         | eutG        | putative transport protein                             |
| STM2470         | eutS        | putative carboxysome structural protein                |
| STM2586         | STM2586     | phage tail assembly-like protein                       |
| STM2632         | STM2632     | exodeoxyribonuclease VIII-like protein [Phage Gifsy-1] |
| STM2735         | STM2735     | hypothetical protein STM2735                           |
| <b>STM2892</b>  | <b>invJ</b> | <b>needle length control protein</b>                   |
| STM3352         | oadA        | oxaloacetate decarboxylase                             |
| STM3475         | nirD        | nitrite reductase small subunit                        |
| STM3558         | STM3558     | death-on-curing protein                                |
| STM3640         | lpfA        | long polar fimbrial protein A precursor                |
| <b>STM3764</b>  | <b>mgtC</b> | <b>Mg<sup>2+</sup> transport protein</b>               |
| STM3808,S       | ibpB        | small heat shock protein                               |
| STM3815         | ccmE        | periplasmic heme-dependent peroxidase                  |
| STM3847         | yidY        | putative transport protein                             |
| STM4075         | ydeY        | putative sugar transport protein                       |
| STM4205         | STM4205     | putative phage glycosyltransferase                     |
| <b>STM4319</b>  | <b>phoN</b> | <b>non-specific acid phosphatase</b>                   |
| STM4377         | aidB        | putative acyl-CoA dehydrogenase                        |
| STM4467         | STM4467     | arginine deiminase                                     |

**Table S5. *S. Typhimurium* genes significantly down-regulated ( $\log_2M \leq -2$ ) in intracellular WT at 24 h p.i. inside fibroblasts (48 genes, see Fig. 2A)**

| Systematic name | Gene    | Product                                                        |
|-----------------|---------|----------------------------------------------------------------|
| STM0128         | murG    | N-acetylglucosaminyl transferase                               |
| STM0191         | fhuA    | outer membrane ferrichrome receptor protein precursor          |
| STM0252         | rrlH    | STM0252                                                        |
| STM0443         | cyoA    | cytochrome o ubiquinol oxidase subunit II                      |
| STM0445         | yajG    | putative lipoprotein                                           |
| STM0648         | leuS    | leucyl-tRNA synthetase                                         |
| STM0679         | metT    | STM0679                                                        |
| STM0732         | sdhC    | succinate dehydrogenase cytochrome b556 large membrane subunit |
| STM0734         | sdhA    | succinate dehydrogenase catalytic subunit                      |
| STM0830         | glnH    | glutamine ABC transporter periplasmic-binding protein          |
| STM0982         | himD    | integration host factor beta subunit                           |
| STM1070         | ompA    | putative hydrogenase membrane component precursor              |
| STM1071         | sulA    | cell division inhibitor                                        |
| STM1200         | tmk     | thymidylate kinase                                             |
| STM1205         | ycfF    | putative protein kinase C inhibitor                            |
| STM1376         | lppB    | putative methyl-accepting chemotaxis protein                   |
| STM1378         | pykF    | pyruvate kinase                                                |
| STM1466         | ydgA    | putative periplasmic protein                                   |
| STM1837         | cspC    | cold shock protein                                             |
| STM1943         | cysT    | STM1943                                                        |
| STM2227         | yejL    | putative cytoplasmic protein                                   |
| STM2419         | lysV    | STM2419                                                        |
| STM2432         | ptsI    | PEP-protein phosphotransferase                                 |
| STM2523         | gcpE    | 4-hydroxy-3-methylbut-2-en-1-yl diphosphate synthase           |
| STM2543         | nifS    | cysteine desulfurase                                           |
| STM2767         | STM2767 | putative DNA/RNA helicase                                      |
| STM2826         | csrA    | carbon storage regulator                                       |
| STM2953         | pyrG    | CTP synthetase                                                 |
| STM3055         | gcvT    | aminomethyltransferase                                         |
| STM3179         | mdaB    | NADPH-specific quinone oxidoreductase                          |
| STM3396         | rrlD    | STM3396                                                        |
| STM3510         | yhgH    | putative amidophosphoribosyltransferase                        |
| STM3705         | yibP    | hypothetical protein STM3705                                   |
| STM3711         | rfaF    | ADP-heptose-LPS heptosyltransferase 1                          |
| STM3931         | argX    | STM3931                                                        |
| STM3934         | proM    | STM3934                                                        |
| STM3937         | STM3937 | uroporphyrinogen-III synthetase                                |
| STM3938         | hemC    | prophobilinogen deaminase                                      |
| STM3991         | rrlA    | STM3991                                                        |
| STM4037         | fdoG    | formate dehydrogenase alpha subunit                            |
| STM4087         | glpF    | glycerol diffusion                                             |
| STM4092         | hslV    | ATP-dependent protease peptidase subunit                       |
| STM4132         | rrsB    | STM4132                                                        |
| STM4135         | rrlB    | STM4135                                                        |
| STM4142         | thrU    | STM4142                                                        |
| STM4415         | fbp     | fructose-1,6-bisphosphatase                                    |
| STM4458         | yjgF    | putative translation initiation inhibitor                      |

**Table S6.** *S. Typhimurium* genes differentially expressed ( $\log_2\text{ratio} \leq -2$  or  $\geq 2$ ) in extracellular WT bacteria in stationary phase compared to intracellular WT (160 genes, see Fig. 3 A)

| Systematic name | Gene    | Product                                           | $\log_2\text{Ratio}$<br>(M) | p value    |
|-----------------|---------|---------------------------------------------------|-----------------------------|------------|
| PSLT016         | pefD    | chaperone                                         | <b>-2.18</b>                | 0.07287299 |
| PSLT016         | pefD    | chaperone                                         | <b>-2.41</b>                | 0.01437791 |
| PSLT029         | PSLT029 | putative cytoplasmic protein                      | <b>-2.36</b>                | 0.00246363 |
| PSLT029         | PSLT029 | putative cytoplasmic protein                      | <b>-2.58</b>                | 0.00257278 |
| PSLT045         | PSLT045 | putative resolvase                                | <b>-2.78</b>                | 0.00036755 |
| PSLT045         | PSLT045 | putative resolvase                                | <b>-3.1</b>                 | 0.00031166 |
| PSLT066         | ssbB    | single-strand DNA binding protein                 | <b>-3.04</b>                | 0.01241746 |
| PSLT066         | ssbB    | single-strand DNA binding protein                 | <b>-3.09</b>                | 0.01055103 |
| PSLT106         | PSLT106 | MvpA-like protein                                 | <b>-2.34</b>                | 0.00120928 |
| PSLT106         | PSLT106 | MvpA-like protein                                 | <b>-3.13</b>                | 0.00019839 |
| PSLT107         | PSLT107 | putative cytoplasmic protein                      | <b>-2.68</b>                | 0.00039112 |
| PSLT107         | PSLT107 | putative cytoplasmic protein                      | <b>-2.76</b>                | 0.00070774 |
| STM0054         | STM0054 | putative oxalacetate decarboxylase subunit beta   | <b>-2.11</b>                | 0.05745692 |
| STM0054         | STM0054 | putative oxalacetate decarboxylase subunit beta   | <b>-2.81</b>                | 0.0027331  |
| STM0056         | STM0056 | putative oxaloacetate decarboxylase subunit gamma | <b>-3.63</b>                | 0.00027368 |
| STM0056         | STM0056 | putative oxaloacetate decarboxylase subunit gamma | <b>-4.24</b>                | 0.00013461 |
| STM0187         | sfsA    | sugar fermentation stimulation protein            | <b>3.62</b>                 | 0.00006678 |
| STM0187         | sfsA    | sugar fermentation stimulation protein            | <b>3.55</b>                 | 0.00008693 |
| STM0252         | rrlH    | STM0252                                           | <b>2.53</b>                 | 0.00296176 |
| STM0252         | rrlH    | STM0252                                           | <b>2.22</b>                 | 0.00427693 |
| STM0279         | STM0279 | putative cytoplasmic protein                      | <b>-2.74</b>                | 0.010131   |
| STM0279         | STM0279 | putative cytoplasmic protein                      | <b>-3.44</b>                | 0.00073691 |
| STM0323         | thrW    | STM0323                                           | <b>4.86</b>                 | 0.00001511 |
| STM0323         | thrW    | STM0323                                           | <b>3.03</b>                 | 0.00011401 |
| STM0340         | stbA    | putative fimbrial major subunit                   | <b>2.79</b>                 | 0.03280989 |
| STM0340         | stbA    | putative fimbrial major subunit                   | <b>2.1</b>                  | 0.02989434 |
| STM0360         | STM0360 | cytochrome BD2 subunit I                          | <b>3.11</b>                 | 0.0101547  |
| STM0360         | STM0360 | cytochrome BD2 subunit I                          | <b>2.71</b>                 | 0.00106081 |
| STM0367         | prpR    | prp operon regulator                              | <b>2.11</b>                 | 0.01219415 |
| STM0367         | prpR    | prp operon regulator                              | <b>2.01</b>                 | 0.00533247 |
| STM0392         | rdgC    | recombination associated protein                  | <b>-2.12</b>                | 0.01498377 |
| STM0392         | rdgC    | recombination associated protein                  | <b>-2.13</b>                | 0.0443021  |
| STM0440         | cyoD    | cytochrome o ubiquinol oxidase subunit IV         | <b>2.26</b>                 | 0.00157766 |
| STM0440         | cyoD    | cytochrome o ubiquinol oxidase subunit IV         | <b>2.03</b>                 | 0.00294961 |
| STM0446         | bolA    | putative regulatory protein                       | <b>2.52</b>                 | 0.00042446 |
| STM0446         | bolA    | putative regulatory protein                       | <b>2.43</b>                 | 0.00075362 |
| STM0467         | ffs     | STM0467                                           | <b>3.91</b>                 | 0.00015488 |
| STM0467         | ffs     | STM0467                                           | <b>3.54</b>                 | 0.00029433 |
| STM0494         | ushA    | UDP-sugar hydrolase/5'-nucleotidase               | <b>-3.31</b>                | 0.00138578 |
| STM0494         | ushA    | UDP-sugar hydrolase/5'-nucleotidase               | <b>-3.49</b>                | 0.00017357 |
| STM0561         | STM0561 | sensor kinase                                     | <b>-3.75</b>                | 0.01980445 |
| STM0561         | STM0561 | sensor kinase                                     | <b>-5.48</b>                | 0.01381041 |
| STM0629         | cspE    | cold shock protein E                              | <b>3.63</b>                 | 0.00008701 |
| STM0629         | cspE    | cold shock protein E                              | <b>3.14</b>                 | 0.000138   |
| STM0665         | gltI    | glutamate/aspartate transporter                   | <b>2.73</b>                 | 0.0010145  |
| STM0665         | gltI    | glutamate/aspartate transporter                   | <b>2.72</b>                 | 0.00043043 |
| STM0674         | glnV    | STM0674                                           | <b>3.25</b>                 | 0.0001947  |
| STM0674         | glnV    | STM0674                                           | <b>2.99</b>                 | 0.00013932 |
| STM0677         | glnU    | STM0677                                           | <b>4.08</b>                 | 0.00001818 |
| STM0677         | glnU    | STM0677                                           | <b>3.95</b>                 | 0.0000344  |
| STM0679         | metT    | STM0679                                           | <b>4.28</b>                 | 0.00001009 |
| STM0679         | metT    | STM0679                                           | <b>4.17</b>                 | 0.00001541 |
| STM0679         | metT    | STM0679                                           | <b>3.69</b>                 | 0.0000295  |
| STM0679         | metT    | STM0679                                           | <b>3.39</b>                 | 0.00005216 |
| STM0759         | ybgS    | hypothetical protein STM0759                      | <b>8.15</b>                 | 0.00091043 |
| STM0759         | ybgS    | hypothetical protein STM0759                      | <b>4.01</b>                 | 0.00001493 |

|         |         |                                                   |       |            |
|---------|---------|---------------------------------------------------|-------|------------|
| STM0766 | dcoC    | putative oxaloacetate decarboxylase subunit gamma | -2.63 | 0.01637511 |
| STM0766 | dcoC    | putative oxaloacetate decarboxylase subunit gamma | -2.9  | 0.01379665 |
| STM0831 | dps     | DNA protection during starvation conditions       | 5.97  | 0.00001038 |
| STM0831 | dps     | DNA protection during starvation conditions       | 5.64  | 0.00000307 |
| STM0832 | ybiF    | putative permease                                 | 2.68  | 0.0006542  |
| STM0832 | ybiF    | putative permease                                 | 2.06  | 0.00403773 |
| STM0853 | yliH    | putative cytoplasmic protein                      | 5.47  | 0.00000227 |
| STM0853 | yliH    | putative cytoplasmic protein                      | 5.02  | 0.0000039  |
| STM0935 | poxB    | pyruvate dehydrogenase                            | 2.39  | 0.00137279 |
| STM0935 | poxB    | pyruvate dehydrogenase                            | 2.1   | 0.0027414  |
| STM0943 | cspD    | stress response protein                           | 2.74  | 0.00082814 |
| STM0943 | cspD    | stress response protein                           | 2.53  | 0.00064768 |
| STM0974 | focA    | putative formate transporter                      | 2.95  | 0.0010292  |
| STM0974 | focA    | putative formate transporter                      | 2.28  | 0.00138251 |
| STM1020 | STM1020 | hypothetical protein STM1020 [Phage Gifsy-2]      | -2.13 | 0.01269025 |
| STM1020 | STM1020 | hypothetical protein STM1020 [Phage Gifsy-2]      | -2.43 | 0.00977943 |
| STM1041 | STM1041 | probable minor tail protein [Phage Gifsy-2]       | -2.37 | 0.01020351 |
| STM1041 | STM1041 | probable minor tail protein [Phage Gifsy-2]       | -2.53 | 0.00067491 |
| STM1070 | ompA    | putative hydrogenase membrane component precursor | 2.86  | 0.00185039 |
| STM1070 | ompA    | putative hydrogenase membrane component precursor | 2.4   | 0.00076521 |
| STM1086 | serT    | STM1086                                           | 3.97  | 0.00003516 |
| STM1086 | serT    | STM1086                                           | 3.29  | 0.0000993  |
| STM1117 | agp     | glucose-1-phosphatase                             | 2.69  | 0.00058935 |
| STM1117 | agp     | glucose-1-phosphatase                             | 2.53  | 0.00093164 |
| STM1119 | wraB    | TrpR binding protein WraB                         | 3.56  | 0.00005044 |
| STM1119 | wraB    | TrpR binding protein WraB                         | 2.9   | 0.00096607 |
| STM1121 | ymdF    | putative cytoplasmic protein                      | 4.91  | 0.00000634 |
| STM1121 | ymdF    | putative cytoplasmic protein                      | 4.9   | 0.00002082 |
| STM1165 | grxB    | glutaredoxin 2                                    | 5.18  | 0.00000281 |
| STM1165 | grxB    | glutaredoxin 2                                    | 4.85  | 0.00000557 |
| STM1219 | ycfW    | integral membrane protein                         | -3.33 | 0.00019499 |
| STM1219 | ycfW    | integral membrane protein                         | -3.96 | 0.00002406 |
| STM1246 | pagC    | virulence membrane protein PAGC precursor         | -2.24 | 0.00427591 |
| STM1246 | pagC    | virulence membrane protein PAGC precursor         | -2.93 | 0.00015551 |
| STM1254 | STM1254 | putative outer membrane lipoprotein               | -2.28 | 0.00142488 |
| STM1254 | STM1254 | putative outer membrane lipoprotein               | -2.3  | 0.00209251 |
| STM1297 | selD    | selenophosphate synthetase                        | -3.38 | 0.00008989 |
| STM1297 | selD    | selenophosphate synthetase                        | -3.62 | 0.00009374 |
| STM1311 | osmE    | transcriptional activator                         | 4.54  | 0.00001187 |
| STM1311 | osmE    | transcriptional activator                         | 3.62  | 0.00236844 |
| STM1398 | sseB    | translocation machinery component                 | -3.01 | 0.00065038 |
| STM1398 | sseB    | translocation machinery component                 | -4.01 | 0.00080884 |
| STM1440 | sodC    | copper/zinc superoxide dismutase                  | 2.94  | 0.0016901  |
| STM1440 | sodC    | copper/zinc superoxide dismutase                  | 2.94  | 0.00057536 |
| STM1441 | STM1441 | putative inner membrane protein                   | 2.91  | 0.00029651 |
| STM1441 | STM1441 | putative inner membrane protein                   | 2.81  | 0.00150997 |
| STM1499 | STM1499 | putative dimethyl sulphoxide reductase chain A1   | -3.05 | 0.00031022 |
| STM1499 | STM1499 | putative dimethyl sulphoxide reductase chain A1   | -3.69 | 0.05096653 |
| STM1563 | osmC    | putative envelope protein                         | 3.64  | 0.00020283 |
| STM1563 | osmC    | putative envelope protein                         | 3.52  | 0.00005014 |
| STM1565 | rpsV    | 30S ribosomal subunit protein S22                 | 2.24  | 0.00122943 |
| STM1565 | rpsV    | 30S ribosomal subunit protein S22                 | 2.02  | 0.02920271 |
| STM1578 | narY    | nitrate reductase 2 beta subunit                  | -3.39 | 0.00222554 |
| STM1578 | narY    | nitrate reductase 2 beta subunit                  | -6.01 | 0.0012047  |
| STM1686 | pspE    | phage shock protein                               | -2.16 | 0.00113288 |
| STM1686 | pspE    | phage shock protein                               | -2.62 | 0.00075228 |
| STM1687 | pspD    | phage shock protein                               | -2.1  | 0.00290842 |
| STM1687 | pspD    | phage shock protein                               | -3.03 | 0.00016011 |
| STM1688 | pspC    | phage shock protein                               | -2.51 | 0.00288137 |
| STM1688 | pspC    | phage shock protein                               | -3.26 | 0.00006888 |
| STM1689 | pspB    | phage shock protein B                             | -3.46 | 0.00011906 |

|         |         |                                                  |       |            |
|---------|---------|--------------------------------------------------|-------|------------|
| STM1689 | pspB    | phage shock protein B                            | -3.82 | 0.00005121 |
| STM1690 | pspA    | phage shock protein                              | -2.01 | 0.00504211 |
| STM1690 | pspA    | phage shock protein                              | -2.12 | 0.00284104 |
| STM1728 | yciG    | putative cytoplasmic protein                     | 7.51  | 0.00000055 |
| STM1728 | yciG    | putative cytoplasmic protein                     | 7.32  | 0.00000061 |
| STM1730 | yciE    | putative cytoplasmic protein                     | 3.66  | 0.00018435 |
| STM1730 | yciE    | putative cytoplasmic protein                     | 3.36  | 0.00008374 |
| STM1810 | STM1810 | putative cytoplasmic protein                     | 2.7   | 0.00127111 |
| STM1810 | STM1810 | putative cytoplasmic protein                     | 2.4   | 0.00276636 |
| STM1851 | STM1851 | putative cytoplasmic protein                     | 2.32  | 0.00276425 |
| STM1851 | STM1851 | putative cytoplasmic protein                     | 2.06  | 0.02158256 |
| STM1868 | mig-3   | phage-tail assembly-like protein                 | -2.05 | 0.01679018 |
| STM1868 | mig-3   | phage-tail assembly-like protein                 | -2.09 | 0.01176625 |
| STM1943 | cysT    | STM1943                                          | 5.09  | 0.00002034 |
| STM1943 | cysT    | STM1943                                          | 4.87  | 0.00000932 |
| STM1984 | yodD    | putative cytoplasmic protein                     | 2.97  | 0.00148684 |
| STM1984 | yodD    | putative cytoplasmic protein                     | 2.47  | 0.00237065 |
| STM2018 | cobU    | adenosylcobinamide kinase                        | -2.65 | 0.00072362 |
| STM2018 | cobU    | adenosylcobinamide kinase                        | -2.91 | 0.00093439 |
| STM2070 | yeeZ    | putative dehydratase                             | 2.81  | 0.00051622 |
| STM2070 | yeeZ    | putative dehydratase                             | 2.6   | 0.00069078 |
| STM2169 | yohC    | putative transport protein                       | 3.89  | 0.0000189  |
| STM2169 | yohC    | putative transport protein                       | 3.49  | 0.00015189 |
| STM2311 | elaB    | putative inner membrane protein                  | 2.63  | 0.00218604 |
| STM2311 | elaB    | putative inner membrane protein                  | 2.34  | 0.01075296 |
| STM2320 | nuoJ    | NADH dehydrogenase subunit J                     | -2.56 | 0.00037133 |
| STM2320 | nuoJ    | NADH dehydrogenase subunit J                     | -2.8  | 0.00188233 |
| STM2346 | STM2346 | putative NTP pyrophosphohydrolase                | -2.12 | 0.00222384 |
| STM2346 | STM2346 | putative NTP pyrophosphohydrolase                | -3.02 | 0.00015889 |
| STM2383 | mepA    | penicillin-insensitive murein endopeptidase      | -3.2  | 0.01842099 |
| STM2383 | mepA    | penicillin-insensitive murein endopeptidase      | -3.24 | 0.00310117 |
| STM2389 | yfcY    | acetyl-CoA acetyltransferase                     | -2.05 | 0.00793967 |
| STM2389 | yfcY    | acetyl-CoA acetyltransferase                     | -2.56 | 0.00293803 |
| STM2404 | STM2404 | hypothetical protein STM2404                     | 2.15  | 0.00577782 |
| STM2404 | STM2404 | hypothetical protein STM2404                     | 2.09  | 0.00193913 |
| STM2432 | ptsI    | PEP-protein phosphotransferase                   | 2.15  | 0.00561373 |
| STM2432 | ptsI    | PEP-protein phosphotransferase                   | 2.06  | 0.00444152 |
| STM2433 | crr     | glucose-specific PTS system enzyme IIA component | 2.28  | 0.00164827 |
| STM2433 | crr     | glucose-specific PTS system enzyme IIA component | 2.08  | 0.0040012  |
| STM2461 | eutG    | putative transport protein                       | -2.1  | 0.01543712 |
| STM2461 | eutG    | putative transport protein                       | -2.44 | 0.01883584 |
| STM2470 | eutS    | putative carboxysome structural protein          | -3.07 | 0.00084878 |
| STM2470 | eutS    | putative carboxysome structural protein          | -4.04 | 0.00004399 |
| STM2473 | talA    | transaldolase                                    | 3.33  | 0.00015402 |
| STM2473 | talA    | transaldolase                                    | 3.33  | 0.00070937 |
| STM2475 | STM2475 | putative cytoplasmic protein                     | -2.61 | 0.00756605 |
| STM2475 | STM2475 | putative cytoplasmic protein                     | -4.58 | 0.00111129 |
| STM2665 | yfiA    | ribosome stabilization factor                    | 2.72  | 0.00038244 |
| STM2665 | yfiA    | ribosome stabilization factor                    | 2.39  | 0.00325806 |
| STM2777 | iroN    | TonB-dependent siderophore receptor protein      | -2.08 | 0.03092316 |
| STM2777 | iroN    | TonB-dependent siderophore receptor protein      | -2.94 | 0.00274672 |
| STM2794 | ygaE    | putative transcriptional repressor               | 2.69  | 0.00091477 |
| STM2794 | ygaE    | putative transcriptional repressor               | 2.47  | 0.00087266 |
| STM2795 | ygaU    | hypothetical protein STM2795                     | 2.83  | 0.0005377  |
| STM2795 | ygaU    | hypothetical protein STM2795                     | 2.69  | 0.00349097 |
| STM2796 | yqaE    | putative transport protein                       | 4.28  | 0.00000992 |
| STM2796 | yqaE    | putative transport protein                       | 3.53  | 0.00007786 |
| STM2814 | emrA    | multidrug resistance secretion protein           | -2.43 | 0.00187205 |
| STM2814 | emrA    | multidrug resistance secretion protein           | -2.54 | 0.00345941 |
| STM2820 | yqaB    | putative phosphoglucomutase                      | -2.05 | 0.00749202 |
| STM2820 | yqaB    | putative phosphoglucomutase                      | -2.54 | 0.007235   |

|           |         |                                           |              |            |
|-----------|---------|-------------------------------------------|--------------|------------|
| STM2826   | csrA    | carbon storage regulator                  | <b>2.28</b>  | 0.00616268 |
| STM2826   | csrA    | carbon storage regulator                  | <b>2.05</b>  | 0.00509878 |
| STM2861   | sitA    | putative periplasmic binding protein      | <b>2.9</b>   | 0.00025842 |
| STM2861   | sitA    | putative periplasmic binding protein      | <b>2.77</b>  | 0.00052514 |
| STM2862   | sitB    | putative ATP-binding protein              | <b>3.76</b>  | 0.00004077 |
| STM2862   | sitB    | putative ATP-binding protein              | <b>2.85</b>  | 0.0006307  |
| STM2864   | sitD    | putative permease                         | <b>3.35</b>  | 0.00021357 |
| STM2864   | sitD    | putative permease                         | <b>2.2</b>   | 0.02180086 |
| STM2924   | rpoS    | RNA polymerase sigma factor               | <b>3.82</b>  | 0.00114417 |
| STM2924   | rpoS    | RNA polymerase sigma factor               | <b>3.44</b>  | 0.00074008 |
| STM2931   | ftsB    | cell division protein FtsB                | <b>-3.24</b> | 0.00033269 |
| STM2931   | ftsB    | cell division protein FtsB                | <b>-3.26</b> | 0.00008825 |
| STM2966   | csrB    | STM2966                                   | <b>3.2</b>   | 0.00141763 |
| STM2966   | csrB    | STM2966                                   | <b>2.39</b>  | 0.00057253 |
| STM2981   | ygdD    | hypothetical protein STM2981              | <b>-3.11</b> | 0.02369411 |
| STM2981   | ygdD    | hypothetical protein STM2981              | <b>-3.81</b> | 0.05596069 |
| STM2983   | ygdI    | putative lipoprotein                      | <b>2.62</b>  | 0.00148756 |
| STM2983   | ygdI    | putative lipoprotein                      | <b>2.6</b>   | 0.00047514 |
| STM3036   | STM3036 | putative inner membrane protein           | <b>2.22</b>  | 0.01351523 |
| STM3036   | STM3036 | putative inner membrane protein           | <b>2.08</b>  | 0.01452092 |
| STM3037   | glyU    | STM3037                                   | <b>4.81</b>  | 0.00018842 |
| STM3037   | glyU    | STM3037                                   | <b>4.03</b>  | 0.00005118 |
| STM3058   | pepP    | proline aminopeptidase P II               | <b>-2.06</b> | 0.09676337 |
| STM3058   | pepP    | proline aminopeptidase P II               | <b>-2.74</b> | 0.03774392 |
| STM3083   | STM3083 | putative mannitol dehydrogenase           | <b>-2.4</b>  | 0.13115437 |
| STM3083   | STM3083 | putative mannitol dehydrogenase           | <b>-3.39</b> | 0.00026555 |
| STM3105   | yggM    | putative periplasmic protein              | <b>3.26</b>  | 0.02151901 |
| STM3105   | yggM    | putative periplasmic protein              | <b>2.91</b>  | 0.02179864 |
| STM3116   | pheV    | STM3116                                   | <b>4.85</b>  | 0.00000453 |
| STM3116   | pheV    | STM3116                                   | <b>4.51</b>  | 0.0000078  |
| STM3228   | yqjC    | putative periplasmic protein              | <b>2.09</b>  | 0.00431422 |
| STM3228   | yqjC    | putative periplasmic protein              | <b>2.02</b>  | 0.00312354 |
| STM3289   | metY    | STM3289                                   | <b>2.53</b>  | 0.0013469  |
| STM3289   | metY    | STM3289                                   | <b>2.16</b>  | 0.00660214 |
| STM3415   | rpoA    | DNA-directed RNA polymerase alpha subunit | <b>-3.21</b> | 0.00027501 |
| STM3415   | rpoA    | DNA-directed RNA polymerase alpha subunit | <b>-3.88</b> | 0.00006827 |
| STM3416   | rpsD    | 30S ribosomal protein S4                  | <b>-3.2</b>  | 0.00073899 |
| STM3416   | rpsD    | 30S ribosomal protein S4                  | <b>-3.98</b> | 0.00006663 |
| STM3417   | rpsK    | 30S ribosomal protein S11                 | <b>-2.7</b>  | 0.00087088 |
| STM3417   | rpsK    | 30S ribosomal protein S11                 | <b>-2.86</b> | 0.00092828 |
| STM3418   | rpsM    | 30S ribosomal protein S13                 | <b>-3.12</b> | 0.00015551 |
| STM3418   | rpsM    | 30S ribosomal protein S13                 | <b>-3.33</b> | 0.00017039 |
| STM3420   | secY    | preprotein translocase SecY               | <b>-2.15</b> | 0.00236988 |
| STM3420   | secY    | preprotein translocase SecY               | <b>-2.49</b> | 0.0015754  |
| STM3421   | rplO    | 50S ribosomal protein L15                 | <b>-3.35</b> | 0.00014769 |
| STM3421   | rplO    | 50S ribosomal protein L15                 | <b>-3.94</b> | 0.00001734 |
| STM3422   | rpmD    | 50S ribosomal protein L30                 | <b>-2.25</b> | 0.00152199 |
| STM3422   | rpmD    | 50S ribosomal protein L30                 | <b>-2.43</b> | 0.0031407  |
| STM3423   | rpsE    | 30S ribosomal protein S5                  | <b>-2.77</b> | 0.00054569 |
| STM3423   | rpsE    | 30S ribosomal protein S5                  | <b>-2.87</b> | 0.00074293 |
| STM3424   | rplR    | 50S ribosomal protein L18                 | <b>-2.82</b> | 0.00024221 |
| STM3424   | rplR    | 50S ribosomal protein L18                 | <b>-3.27</b> | 0.00021192 |
| STM3425   | rplF    | 50S ribosomal protein L6                  | <b>-4.18</b> | 0.00004365 |
| STM3425   | rplF    | 50S ribosomal protein L6                  | <b>-4.45</b> | 0.00001026 |
| STM3426   | rpsH    | 30S ribosomal protein S8                  | <b>-3.7</b>  | 0.00015346 |
| STM3426   | rpsH    | 30S ribosomal protein S8                  | <b>-3.78</b> | 0.00008389 |
| STM3427,S | rpsN    | 30S ribosomal subunit protein S14         | <b>-3.55</b> | 0.0001182  |
| STM3427,S | rpsN    | 30S ribosomal subunit protein S14         | <b>-3.62</b> | 0.00007016 |
| STM3429   | rplX    | 50S ribosomal protein L24                 | <b>-2.06</b> | 0.00267683 |
| STM3429   | rplX    | 50S ribosomal protein L24                 | <b>-2.22</b> | 0.00434639 |
| STM3430   | rplN    | 50S ribosomal protein L14                 | <b>-2.82</b> | 0.0009757  |

|           |         |                                       |       |            |
|-----------|---------|---------------------------------------|-------|------------|
| STM3430   | rplN    | 50S ribosomal protein L14             | -2.93 | 0.00023018 |
| STM3433   | rplP    | 50S ribosomal protein L16             | -3.04 | 0.00027042 |
| STM3433   | rplP    | 50S ribosomal protein L16             | -3.68 | 0.00004338 |
| STM3434   | rpsC    | 30S ribosomal protein S3              | -3.36 | 0.00013017 |
| STM3434   | rpsC    | 30S ribosomal protein S3              | -3.38 | 0.00029707 |
| STM3435   | rplV    | 50S ribosomal protein L22             | -3.84 | 0.00004986 |
| STM3435   | rplV    | 50S ribosomal protein L22             | -4.2  | 0.00003383 |
| STM3436   | rpsS    | 30S ribosomal protein S19             | -2.07 | 0.04999861 |
| STM3436   | rpsS    | 30S ribosomal protein S19             | -3.33 | 0.00031366 |
| STM3438   | rplW    | 50S ribosomal protein L23             | -3.71 | 0.00031872 |
| STM3438   | rplW    | 50S ribosomal protein L23             | -4.53 | 0.00003111 |
| STM3439   | rplD    | 50S ribosomal protein L4              | -5.13 | 0.0000125  |
| STM3439   | rplD    | 50S ribosomal protein L4              | -5.39 | 0.0000043  |
| STM3440   | rplC    | 50S ribosomal protein L3              | -3.58 | 0.00014162 |
| STM3440   | rplC    | 50S ribosomal protein L3              | -3.92 | 0.00004085 |
| STM3475   | nirD    | nitrite reductase small subunit       | -2.86 | 0.00041574 |
| STM3475   | nirD    | nitrite reductase small subunit       | -4.2  | 0.00003085 |
| STM3526   | glpD    | sn-glycerol-3-phosphate dehydrogenase | 3.46  | 0.00005561 |
| STM3526   | glpD    | sn-glycerol-3-phosphate dehydrogenase | 2.77  | 0.00043337 |
| STM3552   | yhhA    | putative outer membrane protein       | 2.56  | 0.00189164 |
| STM3552   | yhhA    | putative outer membrane protein       | 2.26  | 0.02218511 |
| STM3558   | STM3558 | death-on-curing protein               | -3.17 | 0.00077266 |
| STM3558   | STM3558 | death-on-curing protein               | -3.59 | 0.00014679 |
| STM3648   | yiaG    | putative transcriptional regulator    | 3.55  | 0.0000935  |
| STM3648   | yiaG    | putative transcriptional regulator    | 2.62  | 0.00040073 |
| STM3651   | STM3651 | putative acetyltransferase            | -2.33 | 0.00129385 |
| STM3651   | STM3651 | putative acetyltransferase            | -2.55 | 0.00079589 |
| STM3679   | STM3679 | putative cytoplasmic protein          | 2.21  | 0.00150556 |
| STM3679   | STM3679 | putative cytoplasmic protein          | 2.12  | 0.00285911 |
| STM3680   | aldB    | aldehyde dehydrogenase B              | 3.95  | 0.0001015  |
| STM3680   | aldB    | aldehyde dehydrogenase B              | 3.15  | 0.00089176 |
| STM3687   | mtlR    | mannitol operon repressor             | 2.63  | 0.00085804 |
| STM3687   | mtlR    | mannitol operon repressor             | 2.41  | 0.00172229 |
| STM3763   | mgtB    | Mg2+ transporter                      | -2.06 | 0.01016394 |
| STM3763   | mgtB    | Mg2+ transporter                      | -2.61 | 0.00182337 |
| STM3764   | mgtC    | Mg2+ transport protein                | -4.2  | 0.00010524 |
| STM3764   | mgtC    | Mg2+ transport protein                | -4.36 | 0.00001691 |
| STM3794   | STM3794 | putative regulatory protein           | 2.09  | 0.03483971 |
| STM3794   | STM3794 | putative regulatory protein           | 2.06  | 0.00790423 |
| STM3808,S | ibpB    | small heat shock protein              | -2.19 | 0.00336363 |
| STM3808,S | ibpB    | small heat shock protein              | -2.78 | 0.00038379 |
| STM3815   | ccmE    | periplasmic heme-dependent peroxidase | -2.14 | 0.00152393 |
| STM3815   | ccmE    | periplasmic heme-dependent peroxidase | -2.49 | 0.00345587 |
| STM3815   | ccmE    | periplasmic heme-dependent peroxidase | -2.22 | 0.0042699  |
| STM3815   | ccmE    | periplasmic heme-dependent peroxidase | -2.49 | 0.00345587 |
| STM3891   | rrlC    | STM3891                               | 2.41  | 0.04740536 |
| STM3891   | rrlC    | STM3891                               | 2.23  | 0.04881141 |
| STM3931   | argX    | STM3931                               | 4.35  | 0.00011295 |
| STM3931   | argX    | STM3931                               | 3.93  | 0.00002488 |
| STM3932   | hisR    | STM3932                               | 3.63  | 0.00003443 |
| STM3932   | hisR    | STM3932                               | 3.53  | 0.00005251 |
| STM3934   | proM    | STM3934                               | 2.61  | 0.0061852  |
| STM3934   | proM    | STM3934                               | 2.56  | 0.00493238 |
| STM4014   | STM4014 | putative periplasmic protein          | -2.43 | 0.18947529 |
| STM4014   | STM4014 | putative periplasmic protein          | -3.48 | 0.02798201 |
| STM4087   | glpF    | glycerol diffusion                    | 3.23  | 0.00072139 |
| STM4087   | glpF    | glycerol diffusion                    | 2.66  | 0.00124042 |
| STM4132   | rrsB    | STM4132                               | 2.11  | 0.00348869 |
| STM4132   | rrsB    | STM4132                               | 2.02  | 0.01656088 |
| STM4142   | thrU    | STM4142                               | 5.22  | 0.00000417 |
| STM4142   | thrU    | STM4142                               | 4.86  | 0.00000502 |

|         |         |                                                    |       |            |
|---------|---------|----------------------------------------------------|-------|------------|
| STM4147 | secE    | translocase                                        | -2.28 | 0.07150837 |
| STM4147 | secE    | translocase                                        | -3.13 | 0.05971099 |
| STM4150 | rplA    | 50S ribosomal protein L1                           | -2.07 | 0.00296166 |
| STM4150 | rplA    | 50S ribosomal protein L1                           | -2.28 | 0.00143387 |
| STM4240 | yjbJ    | putative cytoplasmic protein                       | 5.4   | 0.00000424 |
| STM4240 | yjbJ    | putative cytoplasmic protein                       | 5.12  | 0.00000283 |
| STM4241 | zur     | transcriptional repressor                          | 3.56  | 0.00005361 |
| STM4241 | zur     | transcriptional repressor                          | 3.53  | 0.00009324 |
| STM4262 | STM4262 | putative ABC-type bacteriocin/lantibiotic exporter | -2.54 | 0.00097513 |
| STM4262 | STM4262 | putative ABC-type bacteriocin/lantibiotic exporter | -2.64 | 0.00033775 |
| STM4319 | phoN    | non-specific acid phosphatase                      | -2.21 | 0.00643769 |
| STM4319 | phoN    | non-specific acid phosphatase                      | -2.43 | 0.00052389 |
| STM4329 | groES   | co-chaperonin GroES                                | -2.24 | 0.00336571 |
| STM4329 | groES   | co-chaperonin GroES                                | -2.52 | 0.00245909 |
| STM4439 | cybC    | cytochrome b562                                    | -2.77 | 0.00462414 |
| STM4439 | cybC    | cytochrome b562                                    | -2.84 | 0.00598646 |
| STM4467 | STM4467 | arginine deiminase                                 | -3.13 | 0.00051824 |
| STM4467 | STM4467 | arginine deiminase                                 | -3.25 | 0.0032668  |
| STM4487 | leuX    | STM4487                                            | 3.3   | 0.00025458 |
| STM4487 | leuX    | STM4487                                            | 3.29  | 0.00026436 |
| STM4561 | osmY    | hyperosmotically-inducible periplasmic protein     | 2.85  | 0.00091792 |
| STM4561 | osmY    | hyperosmotically-inducible periplasmic protein     | 2.5   | 0.00083246 |
| STM4594 | sthA    | putative fimbrial chaparone                        | 3.96  | 0.00013256 |
| STM4594 | sthA    | putative fimbrial chaparone                        | 2.58  | 0.00527714 |

**Table S7.** *S. Typhimurium* genes differentially expressed ( $\log_2\text{ratio} \leq -2$  or  $\geq 2$ ) in intracellular *phoP* mutant compared to intracellular WT (270 genes, see Fig. 3 A)

| Systematic name | Gene        | Product                                               | $\log_2\text{Ratio}$<br>(M) | p value           |
|-----------------|-------------|-------------------------------------------------------|-----------------------------|-------------------|
| PSLT010         | srgB        | putative outer membrane protein                       | <b>-3.18</b>                | 0.00208817        |
| PSLT010         | srgB        | putative outer membrane protein                       | <b>-3.02</b>                | 0.02466669        |
| PSLT016         | pefD        | chaperone                                             | <b>-2.45</b>                | 0.01994782        |
| PSLT016         | pefD        | chaperone                                             | <b>-2.25</b>                | 0.06055057        |
| <b>PSLT037</b>  | <b>spvD</b> | <b>hydrophilic protein</b>                            | <b>-2.79</b>                | <b>0.00262265</b> |
| <b>PSLT037</b>  | <b>spvD</b> | <b>hydrophilic protein</b>                            | <b>-2.08</b>                | <b>0.09473559</b> |
| PSLT046         | PSLT046     | putative carbonic anhydrase                           | <b>-2.65</b>                | 0.00033436        |
| PSLT046         | PSLT046     | putative carbonic anhydrase                           | <b>-2.58</b>                | 0.00022134        |
| PSLT066         | ssbB        | single-strand DNA binding protein                     | <b>-3.76</b>                | 0.00276691        |
| PSLT066         | ssbB        | single-strand DNA binding protein                     | <b>-3.09</b>                | 0.00826867        |
| PSLT073         | traM        | mating signal protein                                 | <b>-3.26</b>                | 0.00185036        |
| PSLT073         | traM        | mating signal protein                                 | <b>-2.9</b>                 | 0.00074686        |
| PSLT079         | traE        | pilus assembly protein                                | <b>-2.56</b>                | 0.00597349        |
| PSLT079         | traE        | pilus assembly protein                                | <b>-2.5</b>                 | 0.00202572        |
| PSLT081         | traB        | pilus assembly protein                                | <b>-2.38</b>                | 0.00214648        |
| PSLT081         | traB        | pilus assembly protein                                | <b>-2.34</b>                | 0.00095841        |
| STM0019         | STM0019     | putative hydroxymethyltransferase                     | <b>-2.89</b>                | 0.00760328        |
| STM0019         | STM0019     | putative hydroxymethyltransferase                     | <b>-2.31</b>                | 0.02302336        |
| STM0054         | STM0054     | putative oxalacetate decarboxylase subunit beta       | <b>-2.81</b>                | 0.00136381        |
| STM0054         | STM0054     | putative oxalacetate decarboxylase subunit beta       | <b>-2.43</b>                | 0.04319258        |
| STM0056         | STM0056     | putative oxaloacetate decarboxylase subunit gamma     | <b>-3.99</b>                | 0.00008835        |
| STM0056         | STM0056     | putative oxaloacetate decarboxylase subunit gamma     | <b>-3.98</b>                | 0.0001113         |
| STM0057         | STM0057     | putative citrate-sodium symporter                     | <b>-2.24</b>                | 0.00536981        |
| STM0057         | STM0057     | putative citrate-sodium symporter                     | <b>-2.1</b>                 | 0.03929914        |
| STM0066         | carA        | carbamoyl-phosphate synthase small subunit            | <b>2.06</b>                 | 0.00182754        |
| STM0066         | carA        | carbamoyl-phosphate synthase small subunit            | <b>2.29</b>                 | 0.00051241        |
| STM0081         | STM0081     | putative secreted protein                             | <b>-2.8</b>                 | 0.00019809        |
| STM0081         | STM0081     | putative secreted protein                             | <b>-2.05</b>                | 0.00147181        |
| STM0086         | kefC        | glutathione-regulated potassium-efflux system protein | <b>-2.13</b>                | 0.00169706        |
| STM0086         | kefC        | glutathione-regulated potassium-efflux system protein | <b>-2.07</b>                | 0.03287109        |
| STM0152         | aceE        | pyruvate dehydrogenase E1 component                   | <b>2.27</b>                 | 0.0013473         |
| STM0152         | aceE        | pyruvate dehydrogenase E1 component                   | <b>2.72</b>                 | 0.00065841        |
| STM0154         | lpdA        | dihydrolipoamide dehydrogenase                        | <b>2.45</b>                 | 0.00034098        |
| STM0154         | lpdA        | dihydrolipoamide dehydrogenase                        | <b>2.72</b>                 | 0.00409701        |
| STM0225         | hlpA        | outer membrane protein H precursor                    | <b>2.76</b>                 | 0.00118281        |
| STM0225         | hlpA        | outer membrane protein H precursor                    | <b>2.8</b>                  | 0.0010174         |
| STM0252         | rriH        | STM0252                                               | <b>2.63</b>                 | 0.00123993        |
| STM0252         | rriH        | STM0252                                               | <b>2.75</b>                 | 0.00037284        |
| STM0279         | STM0279     | putative cytoplasmic protein                          | <b>-3.96</b>                | 0.00043721        |
| STM0279         | STM0279     | putative cytoplasmic protein                          | <b>-3.52</b>                | 0.00228343        |
| STM0294,1N      | STM0294,1N  | hypothetical protein STM0294,1N                       | <b>-3.34</b>                | 0.00062355        |
| STM0294,1N      | STM0294,1N  | hypothetical protein STM0294,1N                       | <b>-2.62</b>                | 0.0012345         |
| STM0295         | STM0295     | putative cytoplasmic protein                          | <b>-2.72</b>                | 0.00130299        |
| STM0295         | STM0295     | putative cytoplasmic protein                          | <b>-2.11</b>                | 0.01007301        |
| STM0339         | stbB        | putative fimbrial chaperone                           | <b>-6.4</b>                 | 0.00633031        |
| STM0339         | stbB        | putative fimbrial chaperone                           | <b>-2.31</b>                | 0.0029537         |
| STM0359         | STM0359     | putative cytoplasmic protein                          | <b>-3.05</b>                | 0.00019532        |
| STM0359         | STM0359     | putative cytoplasmic protein                          | <b>-2.56</b>                | 0.00028772        |
| STM0399         | brnQ        | branched-chain amino acid transporter                 | <b>-2.38</b>                | 0.00054961        |
| STM0399         | brnQ        | branched-chain amino acid transporter                 | <b>-2.06</b>                | 0.00349507        |
| STM0440         | cyoD        | cytochrome o ubiquinol oxidase subunit IV             | <b>2.78</b>                 | 0.00017006        |
| STM0440         | cyoD        | cytochrome o ubiquinol oxidase subunit IV             | <b>2.84</b>                 | 0.00016865        |
| STM0441         | cyoC        | cytochrome o ubiquinol oxidase subunit III            | <b>2.26</b>                 | 0.00053702        |
| STM0441         | cyoC        | cytochrome o ubiquinol oxidase subunit III            | <b>2.35</b>                 | 0.00063882        |
| STM0494         | ushA        | UDP-sugar hydrolase/5'-nucleotidase                   | <b>-2.97</b>                | 0.00252084        |
| STM0494         | ushA        | UDP-sugar hydrolase/5'-nucleotidase                   | <b>-2.87</b>                | 0.00100254        |

|           |           |                                                       |       |            |
|-----------|-----------|-------------------------------------------------------|-------|------------|
| STM0561   | STM0561   | sensor kinase                                         | -7.03 | 0.0000032  |
| STM0561   | STM0561   | sensor kinase                                         | -6.84 | 0.00085124 |
| STM0588   | entF      | enterobactin synthetase component F                   | 2.28  | 0.00041442 |
| STM0588   | entF      | enterobactin synthetase component F                   | 3.59  | 0.00009751 |
| STM0595   | entC      | isochorismate synthase                                | 2.25  | 0.00069291 |
| STM0595   | entC      | isochorismate synthase                                | 2.74  | 0.00034396 |
| STM0623   | citD      | citrate lyase acyl carrier protein gamma chain        | 2.25  | 0.00126591 |
| STM0623   | citD      | citrate lyase acyl carrier protein gamma chain        | 2.42  | 0.00063602 |
| STM0629   | cspE      | cold shock protein E                                  | 2.32  | 0.00211458 |
| STM0629   | cspE      | cold shock protein E                                  | 2.95  | 0.0022006  |
| STM0648   | leuS      | leucyl-tRNA synthetase                                | 2.11  | 0.00260697 |
| STM0648   | leuS      | leucyl-tRNA synthetase                                | 2.61  | 0.00081754 |
| STM0649,S | STM0649,S | putative hydrolase                                    | -2.25 | 0.00710432 |
| STM0649,S | STM0649,S | putative hydrolase                                    | -2.02 | 0.00127746 |
| STM0651   | STM0651   | 2-keto-3-deoxygluconate permease                      | -3.87 | 0.00861325 |
| STM0651   | STM0651   | 2-keto-3-deoxygluconate permease                      | -2.78 | 0.00026846 |
| STM0662   | gltL      | glutamate/aspartate transporter                       | -2.86 | 0.00097199 |
| STM0662   | gltL      | glutamate/aspartate transporter                       | -2.52 | 0.00978681 |
| STM0665   | gltI      | glutamate/aspartate transporter                       | 3.13  | 0.0000636  |
| STM0665   | gltI      | glutamate/aspartate transporter                       | 3.19  | 0.00007599 |
| STM0684   | nagB      | glucosamine-6-phosphate deaminase                     | 2.09  | 0.00134158 |
| STM0684   | nagB      | glucosamine-6-phosphate deaminase                     | 2.57  | 0.00044589 |
| STM0702   | kdpE      | response regulator                                    | -2.17 | 0.00074017 |
| STM0702   | kdpE      | response regulator                                    | -2.04 | 0.00085302 |
| STM0719   | STM0719   | putative UDP-galactopyranose mutase                   | -2.95 | 0.00147277 |
| STM0719   | STM0719   | putative UDP-galactopyranose mutase                   | -2.2  | 0.00094491 |
| STM0737   | sucB      | dihydrolipoamide acetyltransferase                    | 2.86  | 0.00018248 |
| STM0737   | sucB      | dihydrolipoamide acetyltransferase                    | 3.96  | 0.00004456 |
| STM0766   | dcoC      | putative oxaloacetate decarboxylase subunit gamma     | -3.03 | 0.00717617 |
| STM0766   | dcoC      | putative oxaloacetate decarboxylase subunit gamma     | -2.89 | 0.01095986 |
| STM0773   | galM      | galactose-1-epimerase                                 | 2.07  | 0.00161487 |
| STM0773   | galM      | galactose-1-epimerase                                 | 2.07  | 0.00241803 |
| STM0781   | modA      | molybdate transporter                                 | 2.56  | 0.00022561 |
| STM0781   | modA      | molybdate transporter                                 | 2.84  | 0.00034502 |
| STM0811   | ybhN      | hypothetical protein STM0811                          | -2.97 | 0.00437005 |
| STM0811   | ybhN      | hypothetical protein STM0811                          | -2.47 | 0.00599068 |
| STM0812   | ybhO      | cardiolipin synthase                                  | -3.24 | 0.00172939 |
| STM0812   | ybhO      | cardiolipin synthase                                  | -2.17 | 0.00481047 |
| STM0830   | glnH      | glutamine ABC transporter periplasmic-binding protein | 2.29  | 0.00044011 |
| STM0830   | glnH      | glutamine ABC transporter periplasmic-binding protein | 2.4   | 0.00077764 |
| STM0831   | dps       | DNA protection during starvation conditions           | 2.67  | 0.0005568  |
| STM0831   | dps       | DNA protection during starvation conditions           | 3.7   | 0.00012534 |
| STM0943   | cspD      | stress response protein                               | 2.64  | 0.00083825 |
| STM0943   | cspD      | stress response protein                               | 2.71  | 0.00084167 |
| STM0972   | STM0972   | SopD-like protein                                     | 3.09  | 0.00019758 |
| STM0972   | STM0972   | SopD-like protein                                     | 3.32  | 0.00007222 |
| STM0996   | ycbK      | putative outer membrane protein                       | 2.2   | 0.0028001  |
| STM0996   | ycbK      | putative outer membrane protein                       | 2.52  | 0.00059467 |
| STM1006   | STM1006   | excisionase                                           | -2.47 | 0.00029918 |
| STM1006   | STM1006   | excisionase                                           | -2.1  | 0.00166951 |
| STM1020   | STM1020   | hypothetical protein STM1020 [Phage Gifsy-2]          | -2.12 | 0.01200463 |
| STM1020   | STM1020   | hypothetical protein STM1020 [Phage Gifsy-2]          | -2.04 | 0.00776133 |
| STM1034   | STM1034   | putative RecA/RadA recombinase [Phage Gifsy-2]        | -2.46 | 0.00024539 |
| STM1034   | STM1034   | putative RecA/RadA recombinase [Phage Gifsy-2]        | -2.21 | 0.00106711 |
| STM1038   | STM1038   | probable major tail protein [Phage Gifsy-2]           | -3.06 | 0.00013482 |
| STM1038   | STM1038   | probable major tail protein [Phage Gifsy-2]           | -2.54 | 0.00114258 |
| STM1047   | STM1047   | probable tail assembly protein [Phage Gifsy-2]        | -2.62 | 0.00129675 |
| STM1047   | STM1047   | probable tail assembly protein [Phage Gifsy-2]        | -2.05 | 0.00177558 |
| STM1051   | ssel      | secreted effector protein [Phage Gifsy-2]             | 3.14  | 0.00017455 |
| STM1051   | ssel      | secreted effector protein [Phage Gifsy-2]             | 4.12  | 0.00001652 |
| STM1070   | ompA      | putative hydrogenase membrane component precursors    | 3.45  | 0.00012132 |

|                |             |                                                                     |              |                   |
|----------------|-------------|---------------------------------------------------------------------|--------------|-------------------|
| STM1070        | ompA        | putative hydrogenase membrane component precursor                   | <b>3.95</b>  | 0.00006087        |
| STM1071        | sulA        | cell division inhibitor                                             | <b>2.84</b>  | 0.00181142        |
| STM1071        | sulA        | cell division inhibitor                                             | <b>2.85</b>  | 0.00288504        |
| <b>STM1088</b> | <b>pipB</b> | <b>secreted effector protein</b>                                    | <b>3.95</b>  | <b>0.0003397</b>  |
| <b>STM1088</b> | <b>pipB</b> | <b>secreted effector protein</b>                                    | <b>5.1</b>   | <b>0.00001679</b> |
| <b>STM1091</b> | <b>sopB</b> | <b>secreted effector protein</b>                                    | <b>-2.85</b> | <b>0.00014078</b> |
| <b>STM1091</b> | <b>sopB</b> | <b>secreted effector protein</b>                                    | <b>-2.49</b> | <b>0.00075115</b> |
| STM1117        | agp         | glucose-1-phosphatase                                               | <b>2.2</b>   | 0.00066021        |
| STM1117        | agp         | glucose-1-phosphatase                                               | <b>2.37</b>  | 0.00033657        |
| STM1139        | csgG        | putative curli operon transcriptional regulator                     | <b>-2.65</b> | 0.00539909        |
| STM1139        | csgG        | putative curli operon transcriptional regulator                     | <b>-2.07</b> | 0.00220809        |
| STM1165        | grxB        | glutaredoxin 2                                                      | <b>2.83</b>  | 0.00027749        |
| STM1165        | grxB        | glutaredoxin 2                                                      | <b>3.6</b>   | 0.00004657        |
| STM1180        | flgH        | flagellar L-ring protein precursor                                  | <b>-3.17</b> | 0.00027324        |
| STM1180        | flgH        | flagellar L-ring protein precursor                                  | <b>-2.38</b> | 0.01926802        |
| STM1190        | yceD        | putative metal-binding protein                                      | <b>3.62</b>  | 0.00003781        |
| STM1190        | yceD        | putative metal-binding protein                                      | <b>3.74</b>  | 0.00015263        |
| STM1195        | fabG        | 3-ketoacyl-(acyl-carrier-protein) reductase                         | <b>2.68</b>  | 0.00024281        |
| STM1195        | fabG        | 3-ketoacyl-(acyl-carrier-protein) reductase                         | <b>2.74</b>  | 0.00025172        |
| STM1205        | ycfF        | putative protein kinase C inhibitor                                 | <b>2.16</b>  | 0.00092177        |
| STM1205        | ycfF        | putative protein kinase C inhibitor                                 | <b>2.16</b>  | 0.00117658        |
| STM1221        | cobB        | NAD-dependent deacetylase                                           | <b>2.86</b>  | 0.00160945        |
| STM1221        | cobB        | NAD-dependent deacetylase                                           | <b>3.31</b>  | 0.0000782         |
| STM1222        | potD        | spermidine/putrescine ABC transporter periplasmic substrate-binding | <b>3.74</b>  | 0.00017764        |
| STM1222        | potD        | spermidine/putrescine ABC transporter periplasmic substrate-binding | <b>3.85</b>  | 0.00013198        |
| STM1223        | potC        | spermidine/putrescine ABC transporter membrane component            | <b>3.44</b>  | 0.00009492        |
| STM1223        | potC        | spermidine/putrescine ABC transporter membrane component            | <b>4.38</b>  | 0.00002438        |
| <b>STM1224</b> | <b>sifA</b> | <b>secreted effector protein</b>                                    | <b>3.65</b>  | <b>0.00002309</b> |
| <b>STM1224</b> | <b>sifA</b> | <b>secreted effector protein</b>                                    | <b>3.75</b>  | <b>0.00004153</b> |
| STM1234,S      | trmU        | tRNA (5-methylaminomethyl-2-thiouridylate)-methyltransferase        | <b>2.38</b>  | 0.01438858        |
| STM1234,S      | trmU        | tRNA (5-methylaminomethyl-2-thiouridylate)-methyltransferase        | <b>2.66</b>  | 0.01629126        |
| <b>STM1246</b> | <b>pagC</b> | <b>virulence membrane protein PAGC precursor</b>                    | <b>-3.07</b> | <b>0.00015468</b> |
| <b>STM1246</b> | <b>pagC</b> | <b>virulence membrane protein PAGC precursor</b>                    | <b>-2.78</b> | <b>0.0010781</b>  |
| STM1286        | mipA        | MitA-interacting protein A                                          | <b>2.7</b>   | 0.00031956        |
| STM1286        | mipA        | MitA-interacting protein A                                          | <b>3.19</b>  | 0.00006704        |
| STM1297        | selD        | selenophosphate synthetase                                          | <b>-3.54</b> | 0.00010878        |
| STM1297        | selD        | selenophosphate synthetase                                          | <b>-3.46</b> | 0.00013555        |
| STM1329        | STM1329     | putative inner membrane protein                                     | <b>-2.11</b> | 0.00842382        |
| STM1329        | STM1329     | putative inner membrane protein                                     | <b>-2.05</b> | 0.01431392        |
| STM1334,c      | infC        | translation initiation factor IF-3                                  | <b>3.17</b>  | 0.00004917        |
| STM1334,c      | infC        | translation initiation factor IF-3                                  | <b>3.57</b>  | 0.00023303        |
| STM1335        | rpml        | 50S ribosomal protein L35                                           | <b>2.17</b>  | 0.00320161        |
| STM1335        | rpml        | 50S ribosomal protein L35                                           | <b>2.73</b>  | 0.00021719        |
| STM1351        | ydiT        | putative ferredoxin                                                 | <b>-2.94</b> | 0.00043273        |
| STM1351        | ydiT        | putative ferredoxin                                                 | <b>-2.41</b> | 0.00205984        |
| STM1360        | ydiN        | putative transport protein                                          | <b>-2.72</b> | 0.00625632        |
| STM1360        | ydiN        | putative transport protein                                          | <b>-2.21</b> | 0.02138386        |
| STM1369        | sufA        | iron-sulfur cluster assembly scaffold protein                       | <b>3.19</b>  | 0.00014842        |
| STM1369        | sufA        | iron-sulfur cluster assembly scaffold protein                       | <b>3.27</b>  | 0.00010246        |
| STM1370        | sufB        | putative ABC transporter protein                                    | <b>3.03</b>  | 0.00019382        |
| STM1370        | sufB        | putative ABC transporter protein                                    | <b>3.48</b>  | 0.00018798        |
| STM1371        | sufC        | putative transport protein                                          | <b>2.82</b>  | 0.00014908        |
| STM1371        | sufC        | putative transport protein                                          | <b>3.52</b>  | 0.00010183        |
| STM1372        | sufD        | cysteine desulfurase modulator                                      | <b>3.19</b>  | 0.00011382        |
| STM1372        | sufD        | cysteine desulfurase modulator                                      | <b>3.24</b>  | 0.00007001        |
| STM1373        | sufS        | selenocysteine lyase                                                | <b>2.72</b>  | 0.00070724        |
| STM1373        | sufS        | selenocysteine lyase                                                | <b>2.86</b>  | 0.00013721        |
| STM1377        | lpp         | murein lipoprotein                                                  | <b>2.27</b>  | 0.00057743        |
| STM1377        | lpp         | murein lipoprotein                                                  | <b>2.89</b>  | 0.00152994        |
| STM1381        | orf245      | putative cytoplasmic protein                                        | <b>-2.14</b> | 0.01197883        |
| STM1381        | orf245      | putative cytoplasmic protein                                        | <b>-2.13</b> | 0.11588606        |

|         |         |                                                 |       |            |
|---------|---------|-------------------------------------------------|-------|------------|
| STM1394 | ssaC    | outer membrane secretin precursor               | 3.37  | 0.00046613 |
| STM1394 | ssaC    | outer membrane secretin precursor               | 3.58  | 0.00017923 |
| STM1395 | ssaD    | virulence protein                               | 3.25  | 0.00418513 |
| STM1395 | ssaD    | virulence protein                               | 4.28  | 0.00001227 |
| STM1396 | ssaE    | secretion system effector                       | 3.26  | 0.00010416 |
| STM1396 | ssaE    | secretion system effector                       | 3.86  | 0.00010788 |
| STM1398 | sseB    | translocation machinery component               | 4.25  | 0.0000405  |
| STM1398 | sseB    | translocation machinery component               | 4.35  | 0.00015807 |
| STM1399 | sscA    | secretion system chaparone                      | 4.07  | 0.00002031 |
| STM1399 | sscA    | secretion system chaparone                      | 4.56  | 0.00006366 |
| STM1400 | sseC    | translocation machinery component               | 4.25  | 0.00000742 |
| STM1400 | sseC    | translocation machinery component               | 4.32  | 0.00001983 |
| STM1401 | sseD    | translocation machinery component               | 2.42  | 0.00066079 |
| STM1401 | sseD    | translocation machinery component               | 3.34  | 0.00018099 |
| STM1402 | sseE    | secreted effector protein                       | 3.12  | 0.00009862 |
| STM1402 | sseE    | secreted effector protein                       | 3.26  | 0.00004894 |
| STM1403 | sscB    | secretion system chaparone                      | 2.89  | 0.00015205 |
| STM1403 | sscB    | secretion system chaparone                      | 3.05  | 0.00014194 |
| STM1405 | sseG    | secreted effector protein                       | 2.25  | 0.01245671 |
| STM1405 | sseG    | secreted effector protein                       | 2.91  | 0.00135565 |
| STM1406 | ssaG    | type III secretion system apparatus protein     | 3.27  | 0.00013073 |
| STM1406 | ssaG    | type III secretion system apparatus protein     | 3.71  | 0.00006084 |
| STM1407 | ssaH    | type III secretion system apparatus protein     | 4.65  | 0.00000598 |
| STM1407 | ssaH    | type III secretion system apparatus protein     | 4.72  | 0.00001127 |
| STM1408 | ssaI    | type III secretion system apparatus protein     | 4.96  | 0.00000492 |
| STM1408 | ssaI    | type III secretion system apparatus protein     | 5.08  | 0.00002379 |
| STM1409 | ssaJ    | needle complex inner membrane lipoprotein       | 3.51  | 0.00003693 |
| STM1409 | ssaJ    | needle complex inner membrane lipoprotein       | 4.61  | 0.0000835  |
| STM1410 | STM1410 | putative cytoplasmic protein                    | 2.6   | 0.03534368 |
| STM1410 | STM1410 | putative cytoplasmic protein                    | 3.78  | 0.00006511 |
| STM1411 | ssaK    | type III secretion system apparatus protein     | 3.91  | 0.00002663 |
| STM1411 | ssaK    | type III secretion system apparatus protein     | 5.15  | 0.00000028 |
| STM1412 | ssaL    | type III secretion system apparatus protein     | 4.36  | 0.00015022 |
| STM1412 | ssaL    | type III secretion system apparatus protein     | 4.87  | 0.00000573 |
| STM1413 | ssaM    | type III secretion system apparatus protein     | 2.74  | 0.00019541 |
| STM1413 | ssaM    | type III secretion system apparatus protein     | 3.11  | 0.00008665 |
| STM1415 | ssaN    | type III secretion system ATPase                | 3.62  | 0.0000402  |
| STM1415 | ssaN    | type III secretion system ATPase                | 4.39  | 0.00001451 |
| STM1416 | ssaO    | type III secretion system apparatus protein     | 4.74  | 0.00009017 |
| STM1416 | ssaO    | type III secretion system apparatus protein     | 4.93  | 0.0000004  |
| STM1417 | ssaP    | type III secretion system apparatus protein     | 3.51  | 0.00002964 |
| STM1417 | ssaP    | type III secretion system apparatus protein     | 4.8   | 0.00003915 |
| STM1418 | ssaQ    | type III secretion protein                      | 3.27  | 0.00008707 |
| STM1418 | ssaQ    | type III secretion protein                      | 4.05  | 0.00002425 |
| STM1421 | ssaT    | type III secretion system apparatus protein     | 3.37  | 0.00106647 |
| STM1421 | ssaT    | type III secretion system apparatus protein     | 3.44  | 0.00219839 |
| STM1422 | ssaU    | type III secretion system apparatus protein     | 2.35  | 0.00070822 |
| STM1422 | ssaU    | type III secretion system apparatus protein     | 2.37  | 0.00063712 |
| STM1441 | STM1441 | putative inner membrane protein                 | 2.24  | 0.00509263 |
| STM1441 | STM1441 | putative inner membrane protein                 | 2.8   | 0.00021185 |
| STM1499 | STM1499 | putative dimethyl sulphoxide reductase chain A1 | -4.81 | 0.00000045 |
| STM1499 | STM1499 | putative dimethyl sulphoxide reductase chain A1 | -4.37 | 0.01547094 |
| STM1563 | osmC    | putative envelope protein                       | 2.95  | 0.0003636  |
| STM1563 | osmC    | putative envelope protein                       | 3.2   | 0.00018166 |
| STM1567 | adhP    | alcohol dehydrogenase                           | 2.27  | 0.00153444 |
| STM1567 | adhP    | alcohol dehydrogenase                           | 2.91  | 0.00020573 |
| STM1577 | narZ    | nitrate reductase 2 alpha subunit               | -3.28 | 0.00006686 |
| STM1577 | narZ    | nitrate reductase 2 alpha subunit               | -2.86 | 0.00075468 |
| STM1578 | narY    | nitrate reductase 2 beta subunit                | -3.33 | 0.00037125 |
| STM1578 | narY    | nitrate reductase 2 beta subunit                | -3.05 | 0.03160668 |
| STM1631 | sseJ    | secreted effector protein                       | 3.93  | 0.00006637 |

|                |              |                                                                  |              |                   |
|----------------|--------------|------------------------------------------------------------------|--------------|-------------------|
| <b>STM1631</b> | <b>sseJ</b>  | <b>secreted effector protein</b>                                 | <b>5.52</b>  | <b>0.00000197</b> |
| STM1632        | STM1632      | putative inner membrane protein                                  | <b>2.08</b>  | 0.00134945        |
| STM1632        | STM1632      | putative inner membrane protein                                  | <b>2.96</b>  | 0.00032502        |
| STM1682        | tpx          | thiol peroxidase                                                 | <b>2.16</b>  | 0.00207697        |
| STM1682        | tpx          | thiol peroxidase                                                 | <b>2.7</b>   | 0.00016658        |
| STM1698        | STM1698      | putative inner membrane protein                                  | <b>3.97</b>  | 0.00004381        |
| STM1698        | STM1698      | putative inner membrane protein                                  | <b>4.58</b>  | 0.00000775        |
| STM1721        | trpH         | hypothetical protein STM1721                                     | <b>2.06</b>  | 0.0025311         |
| STM1721        | trpH         | hypothetical protein STM1721                                     | <b>2.46</b>  | 0.00118688        |
| STM1729        | yciF         | putative cytoplasmic protein                                     | <b>-3.17</b> | 0.0001057         |
| STM1729        | yciF         | putative cytoplasmic protein                                     | <b>-2.75</b> | 0.00085738        |
| STM1779        | ipk          | 4-diphosphocytidyl-2-C-methyl-D-erythritol kinase                | <b>3.01</b>  | 0.00182133        |
| STM1779        | ipk          | 4-diphosphocytidyl-2-C-methyl-D-erythritol kinase                | <b>3.18</b>  | 0.00078491        |
| STM1846        | proQ         | putative solute/DNA competence effector                          | <b>2.41</b>  | 0.00557119        |
| STM1846        | proQ         | putative solute/DNA competence effector                          | <b>2.46</b>  | 0.00971398        |
| <b>STM1868</b> | <b>mig-3</b> | <b>phage-tail assembly-like protein</b>                          | <b>-3.23</b> | <b>0.00058721</b> |
| <b>STM1868</b> | <b>mig-3</b> | <b>phage-tail assembly-like protein</b>                          | <b>-2.27</b> | <b>0.00060968</b> |
| STM1868A       | STM1868A     | lytic enzyme                                                     | <b>2.7</b>   | 0.00290682        |
| STM1868A       | STM1868A     | lytic enzyme                                                     | <b>3.24</b>  | 0.00012564        |
| STM1883        | purT         | 5'-phosphoribosylglycinamide transformylase                      | <b>-2.39</b> | 0.00033123        |
| STM1883        | purT         | 5'-phosphoribosylglycinamide transformylase                      | <b>-2.29</b> | 0.00052374        |
| STM1896        | STM1896      | putative cytoplasmic protein                                     | <b>-2.5</b>  | 0.00127198        |
| STM1896        | STM1896      | putative cytoplasmic protein                                     | <b>-2.28</b> | 0.00447879        |
| STM1928        | otsA         | trehalose-6-phosphate synthase                                   | <b>-2.73</b> | 0.00244253        |
| STM1928        | otsA         | trehalose-6-phosphate synthase                                   | <b>-2.07</b> | 0.00098858        |
| STM2018        | cobU         | adenosylcobinamide kinase                                        | <b>-2.65</b> | 0.00283954        |
| STM2018        | cobU         | adenosylcobinamide kinase                                        | <b>-2.65</b> | 0.00136304        |
| STM2040        | pduC         | propanediol dehydratase large subunit                            | <b>-3.69</b> | 0.0556512         |
| STM2040        | pduC         | propanediol dehydratase large subunit                            | <b>-2.55</b> | 0.00145277        |
| STM2041        | pduD         | propanediol dehydratase medium subunit                           | <b>-4.23</b> | 0.00277785        |
| STM2041        | pduD         | propanediol dehydratase medium subunit                           | <b>-2.04</b> | 0.13665821        |
| STM2054        | pduT         | polyhedral body protein                                          | <b>-2.59</b> | 0.00092324        |
| STM2054        | pduT         | polyhedral body protein                                          | <b>-2.47</b> | 0.00180795        |
| STM2076        | hisA         | 1-(5-phosphoribosyl)-5-[(5-phosphoribosylamino)methylideneamino] | <b>2.51</b>  | 0.00066996        |
| STM2076        | hisA         | 1-(5-phosphoribosyl)-5-[(5-phosphoribosylamino)methylideneamino] | <b>2.79</b>  | 0.00174145        |
| STM2077        | hisF         | imidazole glycerol phosphate synthase subunit HisF               | <b>2.02</b>  | 0.00168014        |
| STM2077        | hisF         | imidazole glycerol phosphate synthase subunit HisF               | <b>2.32</b>  | 0.00177104        |
| STM2090        | rfbH         | CDP-6-deoxy-D-xylo-4-hexulose-3-dehydrase                        | <b>2.09</b>  | 0.00104502        |
| STM2090        | rfbH         | CDP-6-deoxy-D-xylo-4-hexulose-3-dehydrase                        | <b>2.38</b>  | 0.00237548        |
| STM2115        | wcaA         | putative glycosyl transferase                                    | <b>-2.87</b> | 0.00045075        |
| STM2115        | wcaA         | putative glycosyl transferase                                    | <b>-2.65</b> | 0.00069574        |
| STM2139        | STM2139      | putative inner membrane protein                                  | <b>3.41</b>  | 0.00010978        |
| STM2139        | STM2139      | putative inner membrane protein                                  | <b>4</b>     | 0.00006499        |
| STM2146        | thiD         | phosphomethylpyrimidine kinase                                   | <b>2.48</b>  | 0.00050886        |
| STM2146        | thiD         | phosphomethylpyrimidine kinase                                   | <b>2.55</b>  | 0.00058286        |
| STM2190        | mgIB         | galactose transport protein                                      | <b>2.06</b>  | 0.00299997        |
| STM2190        | mgIB         | galactose transport protein                                      | <b>2.18</b>  | 0.00067938        |
| STM2234        | STM2234      | putative phage tail fiber assembly protein                       | <b>3.71</b>  | 0.0000822         |
| STM2234        | STM2234      | putative phage tail fiber assembly protein                       | <b>4.27</b>  | 0.00001374        |
| STM2236        | STM2236      | hypothetical protein STM2236                                     | <b>2.12</b>  | 0.02461811        |
| STM2236        | STM2236      | hypothetical protein STM2236                                     | <b>2.68</b>  | 0.00180781        |
| STM2267        | ompC         | outer membrane protein C precursor                               | <b>2.27</b>  | 0.00051115        |
| STM2267        | ompC         | outer membrane protein C precursor                               | <b>2.76</b>  | 0.00040796        |
| STM2287        | STM2287      | putative cytoplasmic protein                                     | <b>3.94</b>  | 0.0003949         |
| STM2287        | STM2287      | putative cytoplasmic protein                                     | <b>4.76</b>  | 0.00000591        |
| STM2288        | STM2288      | putative cytoplasmic protein                                     | <b>2.98</b>  | 0.00044689        |
| STM2288        | STM2288      | putative cytoplasmic protein                                     | <b>3.06</b>  | 0.00009553        |
| STM2293        | STM2293      | competence damage-inducible protein A                            | <b>2.16</b>  | 0.0017009         |
| STM2293        | STM2293      | competence damage-inducible protein A                            | <b>2.33</b>  | 0.00072358        |
| STM2300        | STM2300      | putative cytoplasmic protein                                     | <b>-2.58</b> | 0.01150278        |
| STM2300        | STM2300      | putative cytoplasmic protein                                     | <b>-2.45</b> | 0.00146707        |

|         |         |                                                          |       |            |
|---------|---------|----------------------------------------------------------|-------|------------|
| STM2320 | nuoJ    | NADH dehydrogenase subunit J                             | -2.39 | 0.00032134 |
| STM2320 | nuoJ    | NADH dehydrogenase subunit J                             | -2.07 | 0.0154217  |
| STM2389 | yfcY    | acetyl-CoA acetyltransferase                             | -4.05 | 0.00001781 |
| STM2389 | yfcY    | acetyl-CoA acetyltransferase                             | -2.64 | 0.00059258 |
| STM2393 | yfdC    | hypothetical protein STM2393                             | -4.85 | 0.00008007 |
| STM2393 | yfdC    | hypothetical protein STM2393                             | -4.1  | 0.00001732 |
| STM2431 | ptsH    | phosphohistidinoprotein-hexose phosphotransferase        | 2.26  | 0.00162993 |
| STM2431 | ptsH    | phosphohistidinoprotein-hexose phosphotransferase        | 3.09  | 0.00094848 |
| STM2432 | ptsI    | PEP-protein phosphotransferase                           | 2.7   | 0.00110859 |
| STM2432 | ptsI    | PEP-protein phosphotransferase                           | 3.27  | 0.00034859 |
| STM2436 | ptsJ    | putative regulatory protein                              | -2.31 | 0.01314675 |
| STM2436 | ptsJ    | putative regulatory protein                              | -2.3  | 0.0296621  |
| STM2461 | eutG    | putative transport protein                               | -3.8  | 0.00202109 |
| STM2461 | eutG    | putative transport protein                               | -3.18 | 0.00006155 |
| STM2470 | eutS    | putative carboxysome structural protein                  | -4.67 | 0.00000376 |
| STM2470 | eutS    | putative carboxysome structural protein                  | -4.54 | 0.00001942 |
| STM2473 | talA    | transaldolase                                            | 2.45  | 0.00153515 |
| STM2473 | talA    | transaldolase                                            | 2.73  | 0.00038584 |
| STM2475 | STM2475 | putative cytoplasmic protein                             | -5.89 | 0.00002122 |
| STM2475 | STM2475 | putative cytoplasmic protein                             | -5.53 | 0.00015157 |
| STM2487 | purC    | phosphoribosylaminoimidazole-succinocarboxamide synthase | 2.09  | 0.00142964 |
| STM2487 | purC    | phosphoribosylaminoimidazole-succinocarboxamide synthase | 2.7   | 0.00055121 |
| STM2523 | gcpE    | 4-hydroxy-3-methylbut-2-en-1-yl diphosphate synthase     | 2.03  | 0.0011791  |
| STM2523 | gcpE    | 4-hydroxy-3-methylbut-2-en-1-yl diphosphate synthase     | 2.67  | 0.00584651 |
| STM2556 | hmpA    | dihydropteridine reductase 2/nitric oxide dioxygenase    | 3.14  | 0.00119879 |
| STM2556 | hmpA    | dihydropteridine reductase 2/nitric oxide dioxygenase    | 3.22  | 0.00057629 |
| STM2624 | STM2624 | hypothetical protein STM2624                             | -3.63 | 0.00013692 |
| STM2624 | STM2624 | hypothetical protein STM2624                             | -2.75 | 0.00024484 |
| STM2673 | rplS    | 50S ribosomal protein L19                                | 2.01  | 0.00624823 |
| STM2673 | rplS    | 50S ribosomal protein L19                                | 2.36  | 0.00379298 |
| STM2679 | yfjD    | hypothetical protein STM2679                             | -2.38 | 0.0011824  |
| STM2679 | yfjD    | hypothetical protein STM2679                             | -2.16 | 0.00090812 |
| STM2709 | STM2709 | base plate tail-like protein                             | -3.81 | 0.00341942 |
| STM2709 | STM2709 | base plate tail-like protein                             | -2.14 | 0.11474776 |
| STM2719 | STM2719 | terminase-like protein                                   | -2.33 | 0.00091195 |
| STM2719 | STM2719 | terminase-like protein                                   | -2.23 | 0.00433155 |
| STM2727 | STM2727 | hypothetical protein STM2727                             | -2.33 | 0.00036158 |
| STM2727 | STM2727 | hypothetical protein STM2727                             | -2.18 | 0.00094832 |
| STM2735 | STM2735 | hypothetical protein STM2735                             | -3.9  | 0.00030183 |
| STM2735 | STM2735 | hypothetical protein STM2735                             | -2.45 | 0.0007428  |
| STM2773 | iroB    | putative glycosyl transferase                            | 2.84  | 0.00011769 |
| STM2773 | iroB    | putative glycosyl transferase                            | 3.59  | 0.00010718 |
| STM2774 | iroC    | putative ABC transporter protein                         | 3.52  | 0.00014256 |
| STM2774 | iroC    | putative ABC transporter protein                         | 3.68  | 0.00023694 |
| STM2776 | iroE    | putative hydrolase                                       | 2.21  | 0.00695419 |
| STM2776 | iroE    | putative hydrolase                                       | 4.05  | 0.00002948 |
| STM2780 | pipB2   | secreted effector protein                                | 5.96  | 0.00000185 |
| STM2780 | pipB2   | secreted effector protein                                | 7.51  | 0.00000075 |
| STM2782 | mig-14  | putative transcriptional activator                       | -2.89 | 0.00130858 |
| STM2782 | mig-14  | putative transcriptional activator                       | -2.29 | 0.00207058 |
| STM2805 | nrdH    | glutaredoxin-like protein                                | 2.14  | 0.00138596 |
| STM2805 | nrdH    | glutaredoxin-like protein                                | 2.57  | 0.00041432 |
| STM2806 | nrdI    | hypothetical protein STM2806                             | 2.28  | 0.05656411 |
| STM2806 | nrdI    | hypothetical protein STM2806                             | 2.88  | 0.00656825 |
| STM2807 | nrdE    | ribonucleotide-diphosphate reductase alpha subunit       | 2.8   | 0.0007938  |
| STM2807 | nrdE    | ribonucleotide-diphosphate reductase alpha subunit       | 3.47  | 0.00034699 |
| STM2808 | nrdF    | ribonucleotide-diphosphate reductase beta subunit        | 3.18  | 0.00106201 |
| STM2808 | nrdF    | ribonucleotide-diphosphate reductase beta subunit        | 3.36  | 0.00015369 |
| STM2809 | proV    | glycine/betaine/proline transport protein                | 2.68  | 0.00047378 |
| STM2809 | proV    | glycine/betaine/proline transport protein                | 2.78  | 0.00558156 |
| STM2816 | STM2816 | putative glycoporin                                      | -2.64 | 0.00021154 |

|                |             |                                                                   |              |                   |
|----------------|-------------|-------------------------------------------------------------------|--------------|-------------------|
| STM2816        | STM2816     | putative glycoporin                                               | <b>-2.18</b> | 0.00136455        |
| STM2827        | alaS        | alanyl-tRNA synthetase                                            | <b>2.29</b>  | 0.00069283        |
| STM2827        | alaS        | alanyl-tRNA synthetase                                            | <b>2.37</b>  | 0.00046892        |
| STM2861        | sitA        | putative periplasmic binding protein                              | <b>3.64</b>  | 0.00005617        |
| STM2861        | sitA        | putative periplasmic binding protein                              | <b>3.69</b>  | 0.00011751        |
| STM2862        | sitB        | putative ATP-binding protein                                      | <b>3.17</b>  | 0.00021296        |
| STM2862        | sitB        | putative ATP-binding protein                                      | <b>4.22</b>  | 0.0000541         |
| STM2863        | sitC        | putative permease                                                 | <b>2.28</b>  | 0.00624157        |
| STM2863        | sitC        | putative permease                                                 | <b>2.38</b>  | 0.00685852        |
| STM2864        | sitD        | putative permease                                                 | <b>2.88</b>  | 0.00495998        |
| STM2864        | sitD        | putative permease                                                 | <b>3.21</b>  | 0.00004849        |
| <b>STM2892</b> | <b>invJ</b> | <b>needle length control protein</b>                              | <b>-2.84</b> | <b>0.00038248</b> |
| <b>STM2892</b> | <b>invJ</b> | <b>needle length control protein</b>                              | <b>-2.36</b> | <b>0.00095244</b> |
| <b>STM2893</b> | <b>invI</b> | <b>needle complex assembly protein</b>                            | <b>-2.43</b> | <b>0.00187374</b> |
| <b>STM2893</b> | <b>invI</b> | <b>needle complex assembly protein</b>                            | <b>-2.34</b> | <b>0.00050402</b> |
| STM2903        | STM2903     | putative cytoplasmic protein                                      | <b>-3.5</b>  | 0.00057252        |
| STM2903        | STM2903     | putative cytoplasmic protein                                      | <b>-3.29</b> | 0.00158855        |
| <b>STM2924</b> | <b>rpoB</b> | <b>RNA polymerase sigma factor</b>                                | <b>3.88</b>  | <b>0.0007221</b>  |
| <b>STM2924</b> | <b>rpoB</b> | <b>RNA polymerase sigma factor</b>                                | <b>3.88</b>  | <b>0.00064828</b> |
| STM2925        | nlpD        | lipoprotein                                                       | <b>2.52</b>  | 0.00031686        |
| STM2925        | nlpD        | lipoprotein                                                       | <b>2.84</b>  | 0.00010425        |
| STM2953        | pyrG        | CTP synthetase                                                    | <b>2.41</b>  | 0.00041108        |
| STM2953        | pyrG        | CTP synthetase                                                    | <b>2.52</b>  | 0.00050896        |
| STM2954        | mazG        | putative pyrophosphatase                                          | <b>-2.65</b> | 0.00044685        |
| STM2954        | mazG        | putative pyrophosphatase                                          | <b>-2.28</b> | 0.01113471        |
| STM2970        | sdaC        | putative serine transport protein                                 | <b>2.26</b>  | 0.00236957        |
| STM2970        | sdaC        | putative serine transport protein                                 | <b>2.63</b>  | 0.00021973        |
| STM2981        | ygdD        | hypothetical protein STM2981                                      | <b>-4.24</b> | 0.02103544        |
| STM2981        | ygdD        | hypothetical protein STM2981                                      | <b>-3.16</b> | 0.01779525        |
| STM2982        | gcvA        | gcv operon regulator                                              | <b>-3.32</b> | 0.00021151        |
| STM2982        | gcvA        | gcv operon regulator                                              | <b>-3.04</b> | 0.00272736        |
| STM3054        | gcvH        | glycine cleavage system protein H                                 | <b>2.51</b>  | 0.00175757        |
| STM3054        | gcvH        | glycine cleavage system protein H                                 | <b>2.9</b>   | 0.0001349         |
| STM3055        | gcvT        | aminomethyltransferase                                            | <b>2.48</b>  | 0.00175234        |
| STM3055        | gcvT        | aminomethyltransferase                                            | <b>2.83</b>  | 0.00013338        |
| STM3060        | ygfE        | putative cytoplasmic protein                                      | <b>-2.84</b> | 0.07234064        |
| STM3060        | ygfE        | putative cytoplasmic protein                                      | <b>-2.77</b> | 0.00183828        |
| STM3068        | fba         | fructose-bisphosphate aldolase                                    | <b>2.01</b>  | 0.0036419         |
| STM3068        | fba         | fructose-bisphosphate aldolase                                    | <b>2.52</b>  | 0.00125064        |
| STM3069        | pgk         | phosphoglycerate kinase                                           | <b>2.9</b>   | 0.00037909        |
| STM3069        | pgk         | phosphoglycerate kinase                                           | <b>3.05</b>  | 0.00012765        |
| STM3083        | STM3083     | putative mannitol dehydrogenase                                   | <b>-6.6</b>  | 0.00000136        |
| STM3083        | STM3083     | putative mannitol dehydrogenase                                   | <b>-4.26</b> | 0.02578489        |
| STM3133        | STM3133     | putative amidohydrolase                                           | <b>-2.15</b> | 0.00922321        |
| STM3133        | STM3133     | putative amidohydrolase                                           | <b>-2.13</b> | 0.00149006        |
| STM3139        | gsp         | glutathionylspermidine synthetase/glutathionylspermidine amidase  | <b>-2.1</b>  | 0.00072402        |
| STM3139        | gsp         | glutathionylspermidine synthetase/glutathionylspermidine amidase  | <b>-2.06</b> | 0.00385049        |
| STM3230        | yqjE        | putative inner membrane protein                                   | <b>2.28</b>  | 0.00097518        |
| STM3230        | yqjE        | putative inner membrane protein                                   | <b>2.65</b>  | 0.00106973        |
| STM3231        | yqjK        | putative inner membrane protein                                   | <b>2.01</b>  | 0.00175817        |
| STM3231        | yqjK        | putative inner membrane protein                                   | <b>2.01</b>  | 0.00287037        |
| STM3256        | STM3256     | putative phosphotransferase system mannitol/fructose-specific IIA | <b>-3.67</b> | 0.04508451        |
| STM3256        | STM3256     | putative phosphotransferase system mannitol/fructose-specific IIA | <b>-2.4</b>  | 0.0022652         |
| STM3297        | ftsJ        | 23S rRNA methyltransferase                                        | <b>2.45</b>  | 0.00288919        |
| STM3297        | ftsJ        | 23S rRNA methyltransferase                                        | <b>2.46</b>  | 0.0030232         |
| STM3340        | yhck        | transcriptional regulator NanR                                    | <b>-4.06</b> | 0.01094254        |
| STM3340        | yhck        | transcriptional regulator NanR                                    | <b>-2.21</b> | 0.00172865        |
| STM3352        | oadA        | oxaloacetate decarboxylase                                        | <b>-2.36</b> | 0.0338194         |
| STM3352        | oadA        | oxaloacetate decarboxylase                                        | <b>-2.34</b> | 0.03631579        |
| STM3359        | mdh         | malate dehydrogenase                                              | <b>2.69</b>  | 0.0008298         |
| STM3359        | mdh         | malate dehydrogenase                                              | <b>3.62</b>  | 0.00002707        |

|                |             |                                                            |              |                   |
|----------------|-------------|------------------------------------------------------------|--------------|-------------------|
| STM3384        | yhdG        | possible dehydrogenase                                     | <b>2.14</b>  | 0.00379067        |
| STM3384        | yhdG        | possible dehydrogenase                                     | <b>2.8</b>   | 0.01111311        |
| STM3396        | rrlD        | STM3396                                                    | <b>2.04</b>  | 0.00343004        |
| STM3396        | rrlD        | STM3396                                                    | <b>2.28</b>  | 0.00151463        |
| STM3414        | rplQ        | 50S ribosomal protein L17                                  | <b>2.48</b>  | 0.00640917        |
| STM3414        | rplQ        | 50S ribosomal protein L17                                  | <b>2.84</b>  | 0.00468764        |
| STM3420        | secY        | preprotein translocase SecY                                | <b>2.01</b>  | 0.00358742        |
| STM3420        | secY        | preprotein translocase SecY                                | <b>2.09</b>  | 0.00298328        |
| STM3422        | rpmD        | 50S ribosomal protein L30                                  | <b>2.3</b>   | 0.00341094        |
| STM3422        | rpmD        | 50S ribosomal protein L30                                  | <b>2.73</b>  | 0.00337918        |
| STM3426        | rpsH        | 30S ribosomal protein S8                                   | <b>2.15</b>  | 0.00151041        |
| STM3426        | rpsH        | 30S ribosomal protein S8                                   | <b>2.31</b>  | 0.00092471        |
| STM3427,S      | rpsN        | 30S ribosomal subunit protein S14                          | <b>2.3</b>   | 0.00367159        |
| STM3427,S      | rpsN        | 30S ribosomal subunit protein S14                          | <b>2.33</b>  | 0.00037658        |
| STM3428        | rplE        | 50S ribosomal protein L5                                   | <b>2.62</b>  | 0.00031398        |
| STM3428        | rplE        | 50S ribosomal protein L5                                   | <b>2.85</b>  | 0.00030526        |
| STM3429        | rplX        | 50S ribosomal protein L24                                  | <b>2.05</b>  | 0.00506956        |
| STM3429        | rplX        | 50S ribosomal protein L24                                  | <b>3.14</b>  | 0.00087033        |
| STM3430        | rplN        | 50S ribosomal protein L14                                  | <b>2.25</b>  | 0.00817837        |
| STM3430        | rplN        | 50S ribosomal protein L14                                  | <b>2.36</b>  | 0.00797996        |
| STM3475        | nirD        | nitrite reductase small subunit                            | <b>-4.81</b> | 0.00002589        |
| STM3475        | nirD        | nitrite reductase small subunit                            | <b>-3.71</b> | 0.00015368        |
| STM3487        | aroK        | shikimate kinase I                                         | <b>2.12</b>  | 0.00502696        |
| STM3487        | aroK        | shikimate kinase I                                         | <b>2.42</b>  | 0.00185474        |
| STM3491        | yrfC        | putative inner membrane protein                            | <b>-4.53</b> | 0.00550804        |
| STM3491        | yrfC        | putative inner membrane protein                            | <b>-2.42</b> | 0.32373041        |
| STM3529        | gldA        | glycerol dehydrogenase                                     | <b>-3.33</b> | 0.00030641        |
| STM3529        | gldA        | glycerol dehydrogenase                                     | <b>-2.42</b> | 0.00077633        |
| STM3558        | STM3558     | death-on-curing protein                                    | <b>-3.25</b> | 0.00010692        |
| STM3558        | STM3558     | death-on-curing protein                                    | <b>-3.06</b> | 0.00015577        |
| STM3625        | yhjV        | putative transport protein                                 | <b>-4.49</b> | 0.00000756        |
| STM3625        | yhjV        | putative transport protein                                 | <b>-3.02</b> | 0.00085096        |
| STM3640        | lpfA        | long polar fimbrial protein A precursor                    | <b>-2.41</b> | 0.03430451        |
| STM3640        | lpfA        | long polar fimbrial protein A precursor                    | <b>-2.04</b> | 0.00278326        |
| STM3663        | bax         | putative ATP-binding protein                               | <b>2.23</b>  | 0.00094204        |
| STM3663        | bax         | putative ATP-binding protein                               | <b>2.6</b>   | 0.00024869        |
| <b>STM3763</b> | <b>mgtB</b> | <b>Mg2+ transporter</b>                                    | <b>-2.82</b> | <b>0.00142542</b> |
| <b>STM3763</b> | <b>mgtB</b> | <b>Mg2+ transporter</b>                                    | <b>-2.18</b> | <b>0.00405442</b> |
| <b>STM3764</b> | <b>mgtC</b> | <b>Mg2+ transport protein</b>                              | <b>-5.45</b> | <b>0.00000026</b> |
| <b>STM3764</b> | <b>mgtC</b> | <b>Mg2+ transport protein</b>                              | <b>-4.77</b> | <b>0.00000053</b> |
| STM3774        | STM3774     | putative inner membrane protein                            | <b>-4.52</b> | 0.00006488        |
| STM3774        | STM3774     | putative inner membrane protein                            | <b>-3.62</b> | 0.01412864        |
| STM3796A,S     | STM3796A,S  | integral membrane protein                                  | <b>-2.66</b> | 0.00282556        |
| STM3796A,S     | STM3796A,S  | integral membrane protein                                  | <b>-2.18</b> | 0.00463003        |
| STM3815        | ccmE        | periplasmic heme-dependent peroxidase                      | <b>-2.71</b> | 0.00069098        |
| STM3815        | ccmE        | periplasmic heme-dependent peroxidase                      | <b>-2.38</b> | 0.00040588        |
| STM3815        | ccmE        | periplasmic heme-dependent peroxidase                      | <b>-2.31</b> | 0.00382767        |
| STM3815        | ccmE        | periplasmic heme-dependent peroxidase                      | <b>-2.26</b> | 0.00041495        |
| STM3823        | torC        | trimethylamine N-oxide reductase cytochrome c-like subunit | <b>-2.98</b> | 0.03454245        |
| STM3823        | torC        | trimethylamine N-oxide reductase cytochrome c-like subunit | <b>-2.01</b> | 0.06711761        |
| STM3931        | argX        | STM3931                                                    | <b>2.03</b>  | 0.00487878        |
| STM3931        | argX        | STM3931                                                    | <b>2.9</b>   | 0.00133522        |
| STM3991        | rrlA        | STM3991                                                    | <b>2.27</b>  | 0.00174246        |
| STM3991        | rrlA        | STM3991                                                    | <b>2.39</b>  | 0.00168728        |
| STM3996        | yihE        | putative type II homoserine kinase                         | <b>-2.86</b> | 0.08200201        |
| STM3996        | yihE        | putative type II homoserine kinase                         | <b>-2.39</b> | 0.00247131        |
| STM4014        | STM4014     | putative periplasmic protein                               | <b>-4.93</b> | 0.00167434        |
| STM4014        | STM4014     | putative periplasmic protein                               | <b>-2.64</b> | 0.0758244         |
| STM4075        | ydeY        | putative sugar transport protein                           | <b>-2.83</b> | 0.0007394         |
| STM4075        | ydeY        | putative sugar transport protein                           | <b>-2.45</b> | 0.00252911        |
| STM4081        | tpiA        | triosephosphate isomerase                                  | <b>2.3</b>   | 0.00146889        |

|                |             |                                                          |              |                   |
|----------------|-------------|----------------------------------------------------------|--------------|-------------------|
| STM4081        | tpiA        | triosephosphate isomerase                                | <b>3.37</b>  | 0.0001407         |
| STM4086        | glpK        | glycerol kinase                                          | <b>3.21</b>  | 0.00015461        |
| STM4086        | glpK        | glycerol kinase                                          | <b>3.5</b>   | 0.00006553        |
| STM4087        | glpF        | glycerol diffusion                                       | <b>3.87</b>  | 0.00002304        |
| STM4087        | glpF        | glycerol diffusion                                       | <b>4.58</b>  | 0.00004127        |
| STM4132        | rrsB        | STM4132                                                  | <b>2.14</b>  | 0.01233411        |
| STM4132        | rrsB        | STM4132                                                  | <b>2.17</b>  | 0.01331303        |
| STM4132        | rrsB        | STM4132                                                  | <b>2.31</b>  | 0.00452344        |
| STM4132        | rrsB        | STM4132                                                  | <b>2.31</b>  | 0.00166054        |
| STM4135        | rrlB        | STM4135                                                  | <b>2.39</b>  | 0.00140246        |
| STM4135        | rrlB        | STM4135                                                  | <b>2.67</b>  | 0.00053681        |
| STM4142        | thrU        | STM4142                                                  | <b>2.25</b>  | 0.00348061        |
| STM4142        | thrU        | STM4142                                                  | <b>2.49</b>  | 0.00135255        |
| STM4144        | glyT        | STM4144                                                  | <b>2.19</b>  | 0.00103988        |
| STM4144        | glyT        | STM4144                                                  | <b>2.49</b>  | 0.00161938        |
| STM4147        | secE        | translocase                                              | <b>-3.84</b> | 0.00019228        |
| STM4147        | secE        | translocase                                              | <b>-2.9</b>  | 0.07178946        |
| STM4151        | rplJ        | 50S ribosomal protein L10                                | <b>2.2</b>   | 0.00140693        |
| STM4151        | rplJ        | 50S ribosomal protein L10                                | <b>2.27</b>  | 0.00316853        |
| STM4164        | thiC        | thiamine biosynthesis protein ThiC                       | <b>2.26</b>  | 0.0016935         |
| STM4164        | thiC        | thiamine biosynthesis protein ThiC                       | <b>2.26</b>  | 0.00645563        |
| STM4190        | pepE        | peptidase E                                              | <b>-2.16</b> | 0.00084024        |
| STM4190        | pepE        | peptidase E                                              | <b>-2.1</b>  | 0.0012666         |
| STM4199        | STM4199     | putative cytoplasmic protein                             | <b>-2.44</b> | 0.00074091        |
| STM4199        | STM4199     | putative cytoplasmic protein                             | <b>-2.22</b> | 0.00304671        |
| STM4205        | STM4205     | putative phage glycosyltransferase                       | <b>-5.01</b> | 0.00686021        |
| STM4205        | STM4205     | putative phage glycosyltransferase                       | <b>-2.86</b> | 0.00203825        |
| STM4215        | STM4215     | putative cytoplasmic protein                             | <b>-2.61</b> | 0.00038097        |
| STM4215        | STM4215     | putative cytoplasmic protein                             | <b>-2.02</b> | 0.00928817        |
| STM4221        | pgi         | glucose-6-phosphate isomerase                            | <b>2.1</b>   | 0.0058492         |
| STM4221        | pgi         | glucose-6-phosphate isomerase                            | <b>3.59</b>  | 0.00009483        |
| STM4224        | yjbG        | putative periplasmic protein                             | <b>-2.14</b> | 0.0081934         |
| STM4224        | yjbG        | putative periplasmic protein                             | <b>-2.03</b> | 0.00121823        |
| STM4306        | STM4306     | putative anaerobic dimethylsulfoxide reductase subunit B | <b>-2.41</b> | 0.00031877        |
| STM4306        | STM4306     | putative anaerobic dimethylsulfoxide reductase subunit B | <b>-2.18</b> | 0.00107852        |
| STM4310        | STM4310     | putative inner membrane protein                          | <b>-3.32</b> | 0.00005275        |
| STM4310        | STM4310     | putative inner membrane protein                          | <b>-2.89</b> | 0.00808688        |
| STM4315        | STM4315     | putative DNA-binding protein                             | <b>-2.65</b> | 0.00061895        |
| STM4315        | STM4315     | putative DNA-binding protein                             | <b>-2.31</b> | 0.00064164        |
| <b>STM4319</b> | <b>phoN</b> | <b>non-specific acid phosphatase</b>                     | <b>-3.66</b> | <b>0.00001894</b> |
| <b>STM4319</b> | <b>phoN</b> | <b>non-specific acid phosphatase</b>                     | <b>-2.66</b> | <b>0.0004933</b>  |
| STM4344        | yjeA        | lysyl-tRNA synthetase                                    | <b>-4.11</b> | 0.05005005        |
| STM4344        | yjeA        | lysyl-tRNA synthetase                                    | <b>-2.53</b> | 0.00440508        |
| STM4356        | yjeF        | putative sugar kinase                                    | <b>-2.49</b> | 0.01786272        |
| STM4356        | yjeF        | putative sugar kinase                                    | <b>-2.04</b> | 0.29520582        |
| STM4377        | aidB        | putative acyl-CoA dehydrogenase                          | <b>-2.76</b> | 0.00035924        |
| STM4377        | aidB        | putative acyl-CoA dehydrogenase                          | <b>-2.71</b> | 0.00144918        |
| STM4391        | rpsF        | 30S ribosomal protein S6                                 | <b>2.59</b>  | 0.00816442        |
| STM4391        | rpsF        | 30S ribosomal protein S6                                 | <b>2.67</b>  | 0.00502477        |
| STM4415        | fbp         | fructose-1,6-bisphosphatase                              | <b>2.19</b>  | 0.00087833        |
| STM4415        | fbp         | fructose-1,6-bisphosphatase                              | <b>2.46</b>  | 0.00048795        |
| STM4439        | cybC        | cytochrome b562                                          | <b>-2.26</b> | 0.01461133        |
| STM4439        | cybC        | cytochrome b562                                          | <b>-2.23</b> | 0.00980011        |
| STM4467        | STM4467     | arginine deiminase                                       | <b>-3.73</b> | 0.00188589        |
| STM4467        | STM4467     | arginine deiminase                                       | <b>-2.32</b> | 0.00435046        |
| STM4477        | pepA        | leucyl aminopeptidase                                    | <b>2.48</b>  | 0.00029537        |
| STM4477        | pepA        | leucyl aminopeptidase                                    | <b>3.55</b>  | 0.00046738        |
| STM4488        | STM4488     | putative integrase                                       | <b>-3.23</b> | 0.00049586        |
| STM4488        | STM4488     | putative integrase                                       | <b>-2.36</b> | 0.00311026        |
| STM4524        | hsdS        | type I restriction enzyme specificity protein            | <b>-2.71</b> | 0.01188847        |
| STM4524        | hsdS        | type I restriction enzyme specificity protein            | <b>-2.27</b> | 0.08012223        |

**TABLE S8.** Plasmids and oligonucleotides used for chromosome epitope tagging.

| Plasmid / primer   | Plasmid function / oligonucleotide sequence (5'-3') <sup>a</sup>                                    | Reference  |
|--------------------|-----------------------------------------------------------------------------------------------------|------------|
| pSUB11             | Template plasmid used to amplify the 3'-end of the gene fused to a 3xFLAG tag and the Kan cassette. | (1)        |
| pSU315             | Template plasmid used to amplify the 3'-end of the gene fused to an HA tag and the Kan cassette.    | (1)        |
| pKD46              | Plasmid expressing the lambda Red recombinase.                                                      | (1)        |
| <i>pagC</i> -flag1 | AAAAATAAACGGCTTCAACGTCGGGGTTGGATACCGTTTC <b>GACTACAAAGACCATGACGG</b>                                | This study |
| <i>pagC</i> -flag2 | GGCGGTGCGGAAGGCGAACCTTCCGCATAGCTTATGCTTTC <b>CATATGAATATCCTCCTTAG</b>                               | This study |
| <i>mgtC</i> -flag1 | CGATAATATCACCGCAATTC <b>ACTGGAGCATTGATAGTCAAGACTACAAAGACCATGACGG</b>                                | This study |
| <i>mgtC</i> -flag2 | TTATACGCCTGGCGTAATGTTGCAATTGAATAAAAA <b>ACTACATATGAATATCCTCCTTAG</b>                                | This study |
| <i>virK</i> -Fw    | GCTATCATATTCTGGATACAATAATACAAGAGGTCAACAGCCTCTCCCGGG <b>ACTACAAAGACCATGACGG</b>                      | This study |
| <i>virK</i> -Rv    | AAGATCCGCTGAACGGTAGCAGGATCTGCACATCCGCGTATGAAATAGTTC <b>CATATGAATATCCTCCTTAG</b>                     | This study |
| <i>pagP</i> -Fw    | GTTTCGTATAACAACGGAAACGTCTATTTTCGCCTGGATGCGTTTCCAGTTT <b>GACTACAAAGACCATGACGG</b>                    | This study |
| <i>pagP</i> -Rv    | TATTGTTTTTTAAGACTTTTTAATTCACAACTGAAGCATACCC <b>TTCCCCACATATGAATATCCTCCTTAG</b>                      | This study |
| <i>pagN</i> -Fw    | ACACAAAGGCTGCCTCCAATGACTTCATGCTCGGCATTACTTACGCCTTT <b>GACTACAAAGACCATGACGG</b>                      | This study |
| <i>pagN</i> -Rv    | TCCATTGCGCCTTCGGGAACCCACAGGACCAGCTATTTTACCGATAGTG <b>TCATATGAATATCCTCCTTAG</b>                      | This study |

a) Sequences artificially introduced in the primers corresponding to the FLAG- or HA-tag sequences are indicated in bold.

Reference:

1. **Uzzau, S., N. Figueroa-Bossi, S. Rubino, and L. Bossi.** 2001. Epitope tagging of chromosomal genes in *Salmonella*. Proc. Natl. Acad. Sci. U S A **98**:15264-15269.
